# Supplementary material
Source: PubMed Central journal article supplement (PMC8492123)
Supplement: ciaa1123_suppl_supplementary_dataset_1.pdf [file ciaa1123_suppl_supplementary_dataset_1.pdf]

| seqname                       | tax_id  | accession       | description                                                                                             | modified_date | download_date | version_num | source                                           | keywords                        | organism                                         | length | ambig_count | strain      | mol_type    | isolate | isolation_source                                                                                                                  | seq_start | seq_stop | is_type | collection    | species |
|-------------------------------|---------|-----------------|---------------------------------------------------------------------------------------------------------|---------------|---------------|-------------|--------------------------------------------------|---------------------------------|--------------------------------------------------|--------|-------------|-------------|-------------|---------|-----------------------------------------------------------------------------------------------------------------------------------|-----------|----------|---------|---------------|---------|
| AJ233897_1_1521               | 43      | AJ233897        | Cystobacter fuscus 16S rRNA gene, strain Cb 16                                                          | 13-May-05     | 4-Jan-18      | 1           | Cystobacter fuscus                               | 16S ribosomal RNA;16S rRNA      | Cystobacter fuscus                               | 1521   | 0           | Cb 16       | genomic DNA |         |                                                                                                                                   | 1         | 1521     | FALSE   | ncbi_filtered | 43      |
| AJ233899_1_1515               | 43      | AJ233899        | Cystobacter fuscus 16S rRNA gene, strain Cb F39                                                         | 13-May-05     | 4-Jan-18      | 1           | Cystobacter fuscus                               | 16S ribosomal RNA;16S rRNA      | Cystobacter fuscus                               | 1515   | 0           | Cb F39      | genomic DNA |         |                                                                                                                                   | 1         | 1515     | FALSE   | ncbi_filtered | 43      |
| EU262995_1_1312               | 43      | EU262995        | Cystobacter fuscus strain BJ41 16S ribosomal RNA gene, complete sequence                                | 30-Jan-08     | 4-Jan-18      | 1           | Cystobacter fuscus                               |                                 | Cystobacter fuscus                               | 1312   | 0           | BJ41        | genomic DNA |         |                                                                                                                                   | 1         | 1312     | FALSE   | ncbi_filtered | 43      |
| NZ_ANAH0200068_241_1781       | 1242864 | NZ_ANAH0200068  | Cystobacter fuscus DSM 2262 contig58, whole genome shotgun sequence                                     | 9-Apr-17      | 4-Jan-18      | 1           | Cystobacter fuscus DSM 2262                      | WGS;RefSeq                      | Cystobacter fuscus DSM 2262                      | 1541   | 0           | DSM 2262    | genomic DNA |         |                                                                                                                                   | 241       | 1781     | TRUE    | ncbi_filtered | 43      |
| NZ_CP022098_7686045_7687585   | 43      | NZ_CP022098     | Cystobacter fuscus strain DSM 52655, complete genome                                                    | 18-Sep-17     | 4-Jan-18      | 1           | Cystobacter fuscus                               | RefSeq                          | Cystobacter fuscus                               | 1541   | 0           | DSM 52655   | genomic DNA |         | loamy soil beneath bamboo                                                                                                         | 7686045   | 7687585  | FALSE   | ncbi_filtered | 43      |
| AF426102_1_1465               | 491080  | AF426102        | Treponema pallidum subsp. pertenue 16S ribosomal RNA gene, partial sequence                             | 30-Oct-01     | 4-Jan-18      | 1           | Treponema pallidum subsp. pertenue str. Gauthier |                                 | Treponema pallidum subsp. pertenue str. Gauthier | 1465   | 1           | Gauthier    | genomic DNA |         |                                                                                                                                   | 1         | 1465     | FALSE   | ncbi_filtered | 160     |
| NC_016842_279256_280821       | 491078  | NC_016842       | Treponema pallidum subsp. pertenue str. SamoaD, complete genome                                         | 30-Mar-17     | 4-Jan-18      | 1           | Treponema pallidum subsp. pertenue str. SamoaD   | RefSeq                          | Treponema pallidum subsp. pertenue str. SamoaD   | 1566   | 0           | SamoaD      | genomic DNA |         |                                                                                                                                   | 279256    | 280821   | FALSE   | ncbi_filtered | 160     |
| NZ_CP003679_279725_281331     | 105955  | NZ_CP003679     | Treponema pallidum subsp. pallidum str. Sea 81-4, complete genome                                       | 21-Oct-17     | 4-Jan-18      | 1           | Treponema pallidum subsp. pallidum str. Sea 81-4 | RefSeq                          | Treponema pallidum subsp. pallidum str. Sea 81-4 | 1607   | 0           | Sea 81-4    | genomic DNA |         |                                                                                                                                   | 279725    | 281331   | FALSE   | ncbi_filtered | 160     |
| AV621301_1_1507               | 196     | AV621301        | Campylobacter fetus strain 230 16S ribosomal RNA gene, partial sequence                                 | 27-Jun-04     | 4-Jan-18      | 1           | Campylobacter fetus                              |                                 | Campylobacter fetus                              | 1507   | 3           | 23D         | genomic DNA |         |                                                                                                                                   | 1         | 1507     | FALSE   | ncbi_filtered | 196     |
| JQ743021_1_1405               | 196     | JQ743021        | Campylobacter fetus strain campy-7 16S ribosomal RNA gene, partial sequence                             | 10-Apr-13     | 4-Jan-18      | 1           | Campylobacter fetus                              |                                 | Campylobacter fetus                              | 1405   | 0           | campy-7     | genomic DNA |         |                                                                                                                                   | 1         | 1405     | FALSE   | ncbi_filtered | 196     |
| MG5012_1_1461                 | 196     | MG5012          | Campylobacter fetus strain 16S ribosomal RNA gene, partial sequence                                     | 27-Apr-93     | 4-Jan-18      | 1           | Campylobacter fetus                              | 16S ribosomal RNA               | Campylobacter fetus                              | 1461   | 14          | rRNA        | genomic DNA |         |                                                                                                                                   | 1         | 1461     | FALSE   | ncbi_filtered | 196     |
| NZ_FAUT01000001_699964_701480 | 32019   | NZ_FAUT01000001 | Campylobacter fetus subsp. fetus strain 006A-0196, whole genome shotgun sequence                        | 4-Apr-17      | 4-Jan-18      | 1           | Campylobacter fetus subsp. fetus                 | WGS;RefSeq                      | Campylobacter fetus subsp. fetus                 | 1517   | 0           | 006A-0196   | genomic DNA |         | feces                                                                                                                             | 699964    | 701480   | FALSE   | ncbi_filtered | 196     |
| NZ_FAUJ01000002_352_1870      | 32019   | NZ_FAUJ01000002 | Campylobacter fetus subsp. fetus strain 006A-0073, whole genome shotgun sequence                        | 4-Apr-17      | 4-Jan-18      | 1           | Campylobacter fetus subsp. fetus                 | WGS;RefSeq                      | Campylobacter fetus subsp. fetus                 | 1519   | 0           | 006A-0073   | genomic DNA |         | feces                                                                                                                             | 352       | 1870     | FALSE   | ncbi_filtered | 196     |
| KF703950_1_1366               | 197     | KF703950        | Campylobacter jejuni strain 4354D 16S ribosomal RNA gene, partial sequence                              | 24-Feb-14     | 4-Jan-18      | 1           | Campylobacter jejuni                             |                                 | Campylobacter jejuni                             | 1366   | 3           | 4354D       | genomic DNA |         | American crow feces                                                                                                               | 1         | 1366     | FALSE   | ncbi_filtered | 197     |
| KF703968_1_1259               | 197     | KF703968        | Campylobacter jejuni strain 4743C 16S ribosomal RNA gene, partial sequence                              | 24-Feb-14     | 4-Jan-18      | 1           | Campylobacter jejuni                             |                                 | Campylobacter jejuni                             | 1259   | 7           | 4743C       | genomic DNA |         | American crow feces                                                                                                               | 1         | 1259     | FALSE   | ncbi_filtered | 197     |
| KF703989_1_1366               | 197     | KF703989        | Campylobacter jejuni strain 6825H 16S ribosomal RNA gene, partial sequence                              | 24-Feb-14     | 4-Jan-18      | 1           | Campylobacter jejuni                             |                                 | Campylobacter jejuni                             | 1366   | 5           | 6825H       | genomic DNA |         | American crow feces                                                                                                               | 1         | 1366     | FALSE   | ncbi_filtered | 197     |
| NZ_AANR01000007_1011_2523     | 360108  | NZ_AANR01000007 | Campylobacter jejuni subsp. jejuni 260.94 c_jejuni_subsp_jejuni_26094_43, whole genome shotgun sequence | 15-Mar-17     | 4-Jan-18      | 1           | Campylobacter jejuni subsp. jejuni 260.94        | WGS;RefSeq                      | Campylobacter jejuni subsp. jejuni 260.94        | 1513   | 0           | 260.94      | genomic DNA |         |                                                                                                                                   | 1011      | 2523     | FALSE   | ncbi_filtered | 197     |
| NZ_CP019006_401903_403420     | 32022   | NZ_CP019006     | Campylobacter jejuni subsp. jejuni strain 35925, complete genome                                        | 16-Mar-17     | 4-Jan-18      | 1           | Campylobacter jejuni subsp. jejuni               | RefSeq                          | Campylobacter jejuni subsp. jejuni               | 1518   | 0           | 35925       | genomic DNA |         |                                                                                                                                   | 401903    | 403420   | FALSE   | ncbi_filtered | 197     |
| AF550659_1_1604               | 203     | AF550659        | Campylobacter rectus strain LMG 7611 16S ribosomal RNA gene, partial sequence                           | 5-Jun-09      | 4-Jan-18      | 1           | Campylobacter rectus                             |                                 | Campylobacter rectus                             | 1604   | 0           | LMG 7611    | genomic DNA |         |                                                                                                                                   | 1         | 1604     | FALSE   | ncbi_filtered | 203     |
| JN713167_1_1491               | 203     | JN713167        | Campylobacter rectus canine oral taxon O10 clone O1003 16S ribosomal RNA gene, partial sequence         | 9-May-12      | 4-Jan-18      | 1           | Campylobacter rectus                             | ENV                             | Campylobacter rectus                             | 1691   | 0           |             | genomic DNA |         | oral cavity subgingival plaque                                                                                                    | 1         | 1691     | FALSE   | ncbi_filtered | 203     |
| LC011041_1_1659               | 203     | LC011041        | Campylobacter rectus gene for 16S ribosomal RNA, partial sequence, strain: JCM 6302                     | 22-Nov-14     | 4-Jan-18      | 1           | Campylobacter rectus                             |                                 | Campylobacter rectus                             | 1659   | 0           | JCM 6302    | genomic DNA |         |                                                                                                                                   | 1         | 1659     | FALSE   | ncbi_filtered | 203     |
| LC147456_1_1385               | 203     | LC147456        | Campylobacter rectus gene for 16S ribosomal RNA, partial sequence, strain:104317                        | 27-Apr-16     | 4-Jan-18      | 1           | Campylobacter rectus                             |                                 | Campylobacter rectus                             | 1385   | 0           | 104317      | genomic DNA |         |                                                                                                                                   | 1         | 1385     | FALSE   | ncbi_filtered | 203     |
| NZ_ACFU01000050_372_1885      | 55218   | NZ_ACFU01000050 | Campylobacter rectus RM3267 contig0004, whole genome shotgun sequence                                   | 15-Nov-17     | 4-Jan-18      | 1           | Campylobacter rectus RM3267                      | WGS;RefSeq                      | Campylobacter rectus RM3267                      | 1514   | 0           | RM3267      | genomic DNA |         | oral                                                                                                                              | 372       | 1885     | FALSE   | ncbi_filtered | 203     |
| GU56414_1_1398                | 204     | GU56414         | Campylobacter showae strain AGU3 16S ribosomal RNA gene, partial sequence                               | 13-Mar-10     | 4-Jan-18      | 1           | Campylobacter showae                             |                                 | Campylobacter showae                             | 1398   | 0           | AGU3        | genomic DNA |         | oral cavity                                                                                                                       | 1         | 1398     | FALSE   | ncbi_filtered | 204     |
| JQ228541_1_1440               | 204     | JQ228541        | Campylobacter showae strain WAL 18653 16S ribosomal RNA gene, partial sequence                          | 13-Oct-12     | 4-Jan-18      | 1           | Campylobacter showae                             |                                 | Campylobacter showae                             | 1440   | 0           | WAL 18653   | genomic DNA |         | dental plaque                                                                                                                     | 1         | 1440     | FALSE   | ncbi_filtered | 204     |
| K096290_1_1433                | 204     | K096290         | Campylobacter showae culture-collection KCDM:2587 16S ribosomal RNA gene, partial sequence              | 26-Dec-16     | 4-Jan-18      | 1           | Campylobacter showae                             |                                 | Campylobacter showae                             | 1433   | 0           | ChDC PV-A29 | genomic DNA |         | periodontitis subgingival dental plaque                                                                                           | 1         | 1433     | FALSE   | ncbi_filtered | 204     |
| NZ_AVCQ01000030_48_1561       | 553219  | NZ_AVCQ01000030 | Campylobacter showae RM3277 contig0003, whole genome shotgun sequence                                   | 15-Nov-17     | 4-Jan-18      | 1           | Campylobacter showae RM3277                      | WGS;RefSeq                      | Campylobacter showae RM3277                      | 1514   | 0           | RM3277      | genomic DNA |         | biological product [ENVO:02000043]                                                                                                | 48        | 1561     | FALSE   | ncbi_filtered | 204     |
| NZ_AOTD01000077_177_1692      | 1073353 | NZ_AOTD01000077 | Campylobacter showae CCS7C contig_leqid77, whole genome shotgun sequence                                | 11-Apr-17     | 4-Jan-18      | 1           | Campylobacter showae CCS7C                       | WGS;RefSeq                      | Campylobacter showae CCS7C                       | 1516   | 0           | CCS7C       | genomic DNA |         | colon Adenocarcinoma surgical section                                                                                             | 177       | 1692     | FALSE   | ncbi_filtered | 204     |
| AJ704545_1_1451               | 238     | AJ704545        | Chryseobacterium meningosepticum partial 16S rRNA gene, strain ATCC 51720                               | 20-May-04     | 4-Jan-18      | 1           | Elizabethkingia meningoseptica                   | 16S ribosomal RNA;16S rRNA gene | Elizabethkingia meningoseptica                   | 1451   | 0           | ATCC 51720  | genomic DNA |         |                                                                                                                                   | 1         | 1451     | FALSE   | ncbi_filtered | 238     |
| AY468482_1_1464               | 238     | AY468482        | Chryseobacterium meningosepticum strain LDVH 337.01 16S ribosomal RNA gene, partial sequence            | 1-Aug-05      | 4-Jan-18      | 1           | Elizabethkingia meningoseptica                   |                                 | Elizabethkingia meningoseptica                   | 1464   | 0           | LDVH 337.01 | genomic DNA |         | isolated in laboratory facilities (France) from internal organs of clawed frog (Xenopus laevis) with hemorrhagic septicemia       | 1         | 1464     | FALSE   | ncbi_filtered | 238     |
| FJ816020_1_1402               | 238     | FJ816020        | Elizabethkingia meningoseptica strain G3-1-08 16S ribosomal RNA gene, partial sequence                  | 15-Dec-09     | 4-Jan-18      | 1           | Elizabethkingia meningoseptica                   |                                 | Elizabethkingia meningoseptica                   | 1402   | 0           | G3-1-08     | genomic DNA |         | midgut                                                                                                                            | 1         | 1402     | FALSE   | ncbi_filtered | 238     |
| HM480364_1_1429               | 238     | HM480364        | Elizabethkingia meningoseptica strain BAB-227 16S ribosomal RNA gene, partial sequence                  | 11-Aug-10     | 4-Jan-18      | 1           | Elizabethkingia meningoseptica                   |                                 | Elizabethkingia meningoseptica                   | 1429   | 0           | BAB-227     | genomic DNA |         | oil contaminated soil                                                                                                             | 1         | 1429     | FALSE   | ncbi_filtered | 238     |
| HQ154560_1_1483               | 238     | HQ154560        | Elizabethkingia meningoseptica strain R3-4A 16S ribosomal RNA gene, partial sequence                    | 4-Oct-10      | 4-Jan-18      | 1           | Elizabethkingia meningoseptica                   |                                 | Elizabethkingia meningoseptica                   | 1483   | 0           | R3-4A       | genomic DNA |         | midgut                                                                                                                            | 1         | 1483     | FALSE   | ncbi_filtered | 238     |
| KR806354_1_1387               | 253     | KR806354        | Chryseobacterium indologenes strain 5-X4D 16S ribosomal RNA gene, partial sequence                      | 28-May-14     | 4-Jan-18      | 1           | Chryseobacterium indologenes                     |                                 | Chryseobacterium indologenes                     | 1387   | 0           | 5-X4D       | genomic DNA |         |                                                                                                                                   | 1         | 1387     | FALSE   | ncbi_filtered | 253     |
| KP875404_1_1281               | 253     | KP875404        | Chryseobacterium indologenes strain CS 16S ribosomal RNA gene, partial sequence                         | 2-Jun-16      | 4-Jan-18      | 1           | Chryseobacterium indologenes                     |                                 | Chryseobacterium indologenes                     | 1281   | 0           | CS          | genomic DNA |         |                                                                                                                                   | 1         | 1281     | FALSE   | ncbi_filtered | 253     |
| KX28235_1_1491                | 253     | KX28235         | Chryseobacterium indologenes strain F709 16S ribosomal RNA gene, partial sequence                       | 1-Apr-16      | 4-Jan-18      | 1           | Chryseobacterium indologenes                     |                                 | Chryseobacterium indologenes                     | 1387   | 0           | F709        | genomic DNA |         |                                                                                                                                   | 1         | 1387     | FALSE   | ncbi_filtered | 253     |
| KX28235_1_1491                | 253     | KX28235         | Chryseobacterium indologenes strain Amic_5 16S ribosomal RNA gene, partial sequence                     | 7-Aug-16      | 4-Jan-18      | 1           | Chryseobacterium indologenes                     |                                 | Chryseobacterium indologenes                     | 1491   | 0           | Amic_5      | genomic DNA |         | soil                                                                                                                              | 1         | 1491     | FALSE   | ncbi_filtered | 253     |
| MF510497_1_1377               | 253     | MF510497        | Chryseobacterium indologenes strain J22 16S ribosomal RNA gene, partial sequence                        | 29-Oct-17     | 4-Jan-18      | 1           | Chryseobacterium indologenes                     |                                 | Chryseobacterium indologenes                     | 1377   | 0           | J22         | genomic DNA |         |                                                                                                                                   | 1         | 1377     | FALSE   | ncbi_filtered | 253     |
| AB680700_1_1388               | 266     | AB680700        | Paracoccus denitrificans strain NBR3 1491D 16S ribosomal RNA gene, partial sequence                     | 28-Jan-12     | 4-Jan-18      | 1           | Paracoccus denitrificans                         |                                 | Paracoccus denitrificans                         | 1388   | 0           | NBR3 1491D  | genomic DNA |         |                                                                                                                                   | 1         | 1388     | FALSE   | ncbi_filtered | 266     |
| AY157621_1_1387               | 266     | AY157621        | Paracoccus denitrificans isolate NKN15 16S ribosomal RNA gene, partial sequence                         | 19-Feb-03     | 4-Jan-18      | 1           | Paracoccus denitrificans                         |                                 | Paracoccus denitrificans                         | 1387   | 0           |             | genomic DNA | NKN15   |                                                                                                                                   | 1         | 1387     | FALSE   | ncbi_filtered | 266     |
| FM207553_1_1333               | 266     | FM207553        | Paracoccus denitrificans partial 16S rRNA gene, isolate E4                                              | 23-Mar-09     | 4-Jan-18      | 1           | Paracoccus denitrificans                         |                                 | Paracoccus denitrificans                         | 1333   | 0           |             | genomic DNA | E4      | soil                                                                                                                              | 1         | 1333     | FALSE   | ncbi_filtered | 266     |
| HG917908_1_1376               | 266     | HG917908        | Paracoccus denitrificans partial 16S rRNA gene, strain DSM 415                                          | 11-Feb-14     | 4-Jan-18      | 1           | Paracoccus denitrificans                         |                                 | Paracoccus denitrificans                         | 1376   | 0           | DSM 415     | genomic DNA |         |                                                                                                                                   | 1         | 1376     | FALSE   | ncbi_filtered | 266     |
| NZ_PPGA01000028_51377_52843   | 266     | NZ_PPGA01000028 | Paracoccus denitrificans strain ISTOD1 HFCABNI_28, whole genome shotgun sequence                        | 24-Feb-18     | 27-Feb-18     | 1           | Paracoccus denitrificans                         | WGS;RefSeq                      | Paracoccus denitrificans                         | 1467   | 0           | ISTOD1      | genomic DNA |         | Okhla sewage treatment plant                                                                                                      | 51377     | 52843    | FALSE   | ncbi_filtered | 266     |
| AB114607_1_1528               | 292     | AB114607        | Burkholderia cepacia gene for 16S ribosomal RNA, strain CN22                                            | 7-Jan-04      | 4-Jan-18      | 1           | Burkholderia cepacia                             |                                 | Burkholderia cepacia                             | 1528   | 0           | CN22        | genomic DNA |         |                                                                                                                                   | 1         | 1528     | FALSE   | ncbi_filtered | 292     |
| EF114400_1_1477               | 292     | EF114400        | Burkholderia cepacia isolate MSMB10 16S ribosomal RNA gene, partial sequence                            | 9-Jul-09      | 4-Jan-18      | 1           | Burkholderia cepacia                             |                                 | Burkholderia cepacia                             | 1477   | 0           |             | genomic DNA | MSMB10  |                                                                                                                                   | 1         | 1477     | FALSE   | ncbi_filtered | 292     |
| EF78443_1_1463                | 292     | EF78443         | Burkholderia cepacia strain 2Pe4 16S ribosomal RNA gene, partial sequence                               | 4-Jan-08      | 4-Jan-18      | 1           | Burkholderia cepacia                             |                                 | Burkholderia cepacia                             | 1463   | 0           | 2Pe4        | genomic DNA |         | rice                                                                                                                              | 1         | 1463     | FALSE   | ncbi_filtered | 292     |
| EU305400_1_1520               | 292     | EU305400        | Burkholderia cepacia strain PSB3 16S ribosomal RNA gene, partial sequence                               | 8-Jan-08      | 4-Jan-18      | 1           | Burkholderia cepacia                             |                                 | Burkholderia cepacia                             | 1525   | 0           | PSB3        | genomic DNA |         |                                                                                                                                   | 1         | 1525     | FALSE   | ncbi_filtered | 292     |
| KC790448_1_1393               | 292     | KC790448        | Burkholderia cepacia strain TY 16S ribosomal RNA gene, partial sequence                                 | 7-May-13      | 4-Jan-18      | 1           | Burkholderia cepacia                             |                                 | Burkholderia cepacia                             | 1390   | 0           | TY          | genomic DNA |         |                                                                                                                                   | 1         | 1390     | FALSE   | ncbi_filtered | 292     |
| EU434509_1_1378               | 293     | EU434509        | Brevundimonas diminuta strain b215 16S ribosomal RNA gene, partial sequence                             | 3-Jun-09      | 4-Jan-18      | 1           | Brevundimonas diminuta                           |                                 | Brevundimonas diminuta                           | 1378   | 0           | b215        | genomic DNA |         | receiving river of the antibiotic production wastewater effluent receiving river of the antibiotic production wastewater effluent | 1         | 1378     | FALSE   | ncbi_filtered | 293     |
| EU434530_1_1378               | 293     | EU434530        | Brevundimonas diminuta strain b333 16S ribosomal RNA gene, partial sequence                             | 3-Jun-09      | 4-Jan-18      | 1           | Brevundimonas diminuta                           |                                 | Brevundimonas diminuta                           | 1378   | 0           | b333        | genomic DNA |         |                                                                                                                                   | 1         | 1378     | FALSE   | ncbi_filtered | 293     |
| EU977683_1_1382               | 293     | EU977683        | Brevundimonas diminuta strain ZP06AC 16S ribosomal RNA gene, partial sequence                           | 8-Jul-13      | 4-Jan-18      | 1           | Brevundimonas diminuta                           |                                 | Brevundimonas diminuta                           | 1382   | 1           | ZP06AC      | genomic DNA |         | Kennedy Space Center clean-room floor                                                                                             | 1         | 1382     | FALSE   | ncbi_filtered | 293     |
| FJ50592_1_13                  |         |                 |                                                                                                         |               |               |             |                                                  |                                 |                                                  |        |             |             |             |         |                                                                                                                                   |           |          |         |               |         |

| seqname                     | tax_id | accession       | description                                                                                 | modified_date | download_date | version | num | source                                                                        | keywords   | organism                             | length | ambig_count | strain          | mol_type    | isolate | isolation_source                                                                                       | seq_start | seq_end | is_type | collection    | species |
|-----------------------------|--------|-----------------|---------------------------------------------------------------------------------------------|---------------|---------------|---------|-----|-------------------------------------------------------------------------------|------------|--------------------------------------|--------|-------------|-----------------|-------------|---------|--------------------------------------------------------------------------------------------------------|-----------|---------|---------|---------------|---------|
| AV118112_1_1466             | 303    | AV118112        | <i>Pseudomonas putida</i> strain BW11M1 16S ribosomal RNA gene, partial sequence            | 16-Feb-16     | 4-Jan-18      | 1       |     | Pseudomonas putida                                                            |            | <i>Pseudomonas putida</i>            | 1466   | 1           | BW11M1          | genomic DNA |         | banana rhizosphere                                                                                     | 1         | 1466    | FALSE   | ncbi_filtered | 303     |
| GQ330565_1_1415             | 303    | GQ330565        | <i>Pseudomonas putida</i> strain L13 16S ribosomal RNA gene, partial sequence               | 2-Aug-09      | 4-Jan-18      | 1       |     | Pseudomonas putida                                                            |            | <i>Pseudomonas putida</i>            | 1415   | 0           | L13             | genomic DNA |         |                                                                                                        | 1         | 1415    | FALSE   | ncbi_filtered | 303     |
| KJ719396_1_1384             | 303    | KJ719396        | <i>Pseudomonas putida</i> strain GN81 16S ribosomal RNA gene, partial sequence              | 3-Sep-14      | 4-Jan-18      | 1       |     | Pseudomonas putida                                                            |            | <i>Pseudomonas putida</i>            | 1384   | 0           | GN81            | genomic DNA |         | water                                                                                                  | 1         | 1384    | FALSE   | ncbi_filtered | 303     |
| KP418808_1_1378             | 303    | KP418808        | <i>Pseudomonas putida</i> strain PFF93 16S ribosomal RNA gene, partial sequence             | 27-May-15     | 4-Jan-18      | 1       |     | Pseudomonas putida                                                            |            | <i>Pseudomonas putida</i>            | 1378   | 0           | PFF93           | genomic DNA |         | rhizospheres                                                                                           | 1         | 1378    | FALSE   | ncbi_filtered | 303     |
| NC_010322_2092721_2094267   | 76869  | NC_010322       | <i>Pseudomonas putida</i> GB-1, complete genome                                             | 19-May-17     | 4-Jan-18      | 1       |     | Pseudomonas putida GB-1                                                       | RefSeq     | <i>Pseudomonas putida</i> GB-1       | 1547   | 0           | GB-1            | genomic DNA |         |                                                                                                        | 2092721   | 2094267 | FALSE   | ncbi_filtered | 303     |
| AF368755_1_1505             | 304    | AF368755        | <i>Pseudomonas saccharophila</i> 16S ribosomal RNA gene, partial sequence                   | 28-Mar-02     | 4-Jan-18      | 1       |     | Pelomonas saccharophila                                                       |            | <i>Pelomonas saccharophila</i>       | 1505   | 0           | 1-May           | genomic DNA |         |                                                                                                        | 1         | 1505    | FALSE   | ncbi_filtered | 304     |
| F1513082_1_1394             | 304    | F1513082        | <i>Pelomonas saccharophila</i> strain del-2 16S ribosomal RNA gene, partial sequence        | 4-Jan-09      | 4-Jan-18      | 1       |     | Pelomonas saccharophila                                                       |            | <i>Pelomonas saccharophila</i>       | 1394   | 0           | del-2           | genomic DNA |         | wastewater treatment system of a pesticide manufacturer                                                | 1         | 1394    | FALSE   | ncbi_filtered | 304     |
| FM886888_1_1399             | 304    | FM886888        | <i>Pelomonas saccharophila</i> partial 16S rRNA gene, strain OTS_M_215                      | 26-Aug-10     | 4-Jan-18      | 1       |     | Pelomonas saccharophila                                                       |            | <i>Pelomonas saccharophila</i>       | 1399   | 0           | OTS_M_215       | genomic DNA |         | floodplain                                                                                             | 1         | 1399    | FALSE   | ncbi_filtered | 304     |
| FJ304445_1_1376             | 304    | FJ304445        | <i>Pelomonas saccharophila</i> strain C92 16S ribosomal RNA gene, partial sequence          | 11-Jul-11     | 4-Jan-18      | 1       |     | Pelomonas saccharophila                                                       |            | <i>Pelomonas saccharophila</i>       | 1376   | 0           | C92             | genomic DNA |         | white clover rhizosphere soil                                                                          | 1         | 1376    | FALSE   | ncbi_filtered | 304     |
| NR_115049_1_1471            | 304    | NR_115049       | <i>Pelomonas saccharophila</i> strain ATCC 15946 16S ribosomal RNA gene, partial sequence   | 3-Feb-15      | 4-Jan-18      | 1       |     | Pelomonas saccharophila                                                       | RefSeq     | <i>Pelomonas saccharophila</i>       | 1471   | 0           | ATCC 15946      | rRNA        |         |                                                                                                        | 1         | 1471    | TRUE    | ncbi_filtered | 304     |
| KC789785_1_1308             | 305    | KC789785        | <i>Ralstonia solanacearum</i> strain BGR26 16S ribosomal RNA gene, partial sequence         | 2-Jul-13      | 4-Jan-18      | 1       |     | Ralstonia solanacearum                                                        |            | <i>Ralstonia solanacearum</i>        | 1308   | 0           | BGR26           | genomic DNA |         | soil                                                                                                   | 1         | 1308    | FALSE   | ncbi_filtered | 305     |
| KF240799_1_1424             | 305    | KF240799        | <i>Ralstonia solanacearum</i> strain Phg-L2 16S ribosomal RNA gene, partial sequence        | 4-Aug-13      | 4-Jan-18      | 1       |     | Ralstonia solanacearum                                                        |            | <i>Ralstonia solanacearum</i>        | 1424   | 0           | Phg-L2          | genomic DNA |         | infected fruits, vascular tissue and stem                                                              | 1         | 1424    | FALSE   | ncbi_filtered | 305     |
| KT359576_1_1317             | 305    | KT359576        | <i>Ralstonia solanacearum</i> strain BS 16S ribosomal RNA gene, partial sequence            | 25-Sep-15     | 4-Jan-18      | 1       |     | Ralstonia solanacearum                                                        |            | <i>Ralstonia solanacearum</i>        | 1317   | 0           | BS              | genomic DNA |         | explant roots                                                                                          | 1         | 1317    | FALSE   | ncbi_filtered | 305     |
| KY010339_1_1568             | 305    | KY010339        | <i>Ralstonia solanacearum</i> strain BT_HNGU_38 16S ribosomal RNA gene, partial sequence    | 25-Oct-16     | 4-Jan-18      | 1       |     | Ralstonia solanacearum                                                        |            | <i>Ralstonia solanacearum</i>        | 1568   | 15          | BT_HNGU_38      | genomic DNA |         | Wild Bird fecal                                                                                        | 1         | 1568    | FALSE   | ncbi_filtered | 305     |
| NCJ70100002_156859_158403   | 305    | NCJ70100002     | <i>Ralstonia solanacearum</i> strain UW700 16S ribosomal RNA gene, partial sequence         | 14-Aug-17     | 4-Jan-18      | 1       |     | Ralstonia solanacearum                                                        | WGS        | <i>Ralstonia solanacearum</i>        | 1545   | 0           | UW700           | genomic DNA |         | agricultural field                                                                                     | 156859    | 158403  | FALSE   | ncbi_filtered | 305     |
| FJ768951_1_1456             | 316    | FJ768951        | <i>Pseudomonas stutzeri</i> 16S ribosomal RNA gene, partial sequence                        | 29-Mar-09     | 4-Jan-18      | 1       |     | Pseudomonas stutzeri                                                          |            | <i>Pseudomonas stutzeri</i>          | 1456   | 0           | WY20081         | genomic DNA |         | waste water                                                                                            | 1         | 1456    | FALSE   | ncbi_filtered | 316     |
| GU339277_1_1500             | 316    | GU339277        | <i>Pseudomonas stutzeri</i> strain EH49 16S ribosomal RNA gene, partial sequence            | 7-Feb-10      | 4-Jan-18      | 1       |     | Pseudomonas stutzeri                                                          |            | <i>Pseudomonas stutzeri</i>          | 1500   | 0           | EH49            | genomic DNA |         | sampling site R2, Rajkot industrial estate (polluted with oil spills from coconut-extracting industry) | 1         | 1500    | FALSE   | ncbi_filtered | 316     |
| KC660146_1_1444             | 316    | KC660146        | <i>Pseudomonas stutzeri</i> strain PST-03 16S ribosomal RNA gene, partial sequence          | 27-Feb-13     | 4-Jan-18      | 1       |     | Pseudomonas stutzeri                                                          |            | <i>Pseudomonas stutzeri</i>          | 1444   | 0           | PST-03          | genomic DNA |         | ocean water                                                                                            | 1         | 1444    | FALSE   | ncbi_filtered | 316     |
| KU161262_1_1489             | 316    | KU161262        | <i>Pseudomonas stutzeri</i> strain TLA-30 16S ribosomal RNA gene, partial sequence          | 28-Apr-16     | 4-Jan-18      | 1       |     | Pseudomonas stutzeri                                                          |            | <i>Pseudomonas stutzeri</i>          | 1489   | 0           | TLA-30          | genomic DNA |         | young landfill leachate                                                                                | 1         | 1489    | FALSE   | ncbi_filtered | 316     |
| POU01000011_3723_5260       | 316    | POU01000011     | <i>Pseudomonas stutzeri</i> strain 28a39                                                    | 17-Jan-18     | 22-Jan-18     | 1       |     | Pseudomonas stutzeri                                                          | WGS        | <i>Pseudomonas stutzeri</i>          | 1538   | 0           | 28a39           | genomic DNA |         | soil                                                                                                   | 3723      | 5260    | FALSE   | ncbi_filtered | 316     |
| JG689181_1_1417             | 329    | JG689181        | <i>Ralstonia pickettii</i> strain B1R01 16S ribosomal RNA gene, partial sequence            | 6-Jul-16      | 4-Jan-18      | 1       |     | Ralstonia pickettii                                                           |            | <i>Ralstonia pickettii</i>           | 1417   | 0           | B1R01           | genomic DNA |         | mineral water                                                                                          | 1         | 1417    | FALSE   | ncbi_filtered | 329     |
| JM010987_1_1442             | 329    | JM010987        | <i>Ralstonia pickettii</i> strain C2 16S ribosomal RNA gene, partial sequence               | 25-Jul-12     | 4-Jan-18      | 1       |     | Ralstonia pickettii                                                           |            | <i>Ralstonia pickettii</i>           | 1442   | 0           | C2              | genomic DNA |         | biotope mineral and soil                                                                               | 1         | 1442    | FALSE   | ncbi_filtered | 329     |
| MF102046_1_1410             | 329    | MF102046        | <i>Ralstonia pickettii</i> strain MR-CH-12 16S ribosomal RNA gene, partial sequence         | 20-May-17     | 4-Jan-18      | 1       |     | Ralstonia pickettii                                                           |            | <i>Ralstonia pickettii</i>           | 1410   | 0           | MR-CH-12        | genomic DNA |         | farmland soil near heavy metal-contaminated waste dump                                                 | 1         | 1410    | FALSE   | ncbi_filtered | 329     |
| NC_010678_818859_820405     | 402626 | NC_010678       | <i>Ralstonia pickettii</i> 12J chromosome 2, complete sequence                              | 19-May-17     | 4-Jan-18      | 1       |     | Ralstonia pickettii 12J                                                       | RefSeq     | <i>Ralstonia pickettii</i> 12J       | 1547   | 0           | 12J             | genomic DNA |         |                                                                                                        | 818859    | 820405  | FALSE   | ncbi_filtered | 329     |
| NC_02032537_542216_543762   | 329    | NC_02032537     | <i>Ralstonia pickettii</i> strain FDAARGOS_410 chromosome 1, complete sequence              | 1-Oct-17      | 4-Jan-18      | 1       |     | Ralstonia pickettii                                                           | RefSeq     | <i>Ralstonia pickettii</i>           | 1547   | 0           | FDAARGOS_410    | genomic DNA |         | Endotracheal aspirate                                                                                  | 542216    | 543762  | FALSE   | ncbi_filtered | 329     |
| F1472857_1_1473             | 330    | F1472857        | <i>Pseudomonas pseudoalcaligenes</i> strain JMS 16S ribosomal RNA gene, partial sequence    | 29-Dec-08     | 4-Jan-18      | 1       |     | Pseudomonas pseudoalcaligenes                                                 |            | <i>Pseudomonas pseudoalcaligenes</i> | 1473   | 0           | JMS             | genomic DNA |         |                                                                                                        | 1         | 1473    | FALSE   | ncbi_filtered | 330     |
| JF911373_1_1403             | 330    | JF911373        | <i>Pseudomonas pseudoalcaligenes</i> strain ECAe51 16S ribosomal RNA gene, partial sequence | 6-Oct-11      | 4-Jan-18      | 1       |     | Pseudomonas pseudoalcaligenes                                                 |            | <i>Pseudomonas pseudoalcaligenes</i> | 1403   | 0           | ECAe51          | genomic DNA |         |                                                                                                        | 1         | 1403    | FALSE   | ncbi_filtered | 330     |
| KF873510_1_1440             | 330    | KF873510        | <i>Pseudomonas pseudoalcaligenes</i> strain JGR2 16S ribosomal RNA gene, partial sequence   | 28-Feb-14     | 4-Jan-18      | 1       |     | Pseudomonas pseudoalcaligenes                                                 |            | <i>Pseudomonas pseudoalcaligenes</i> | 1440   | 0           | JGR2            | genomic DNA |         | root and rhizospheric soil in heavy metal-contaminated wetland                                         | 1         | 1440    | FALSE   | ncbi_filtered | 330     |
| KJ588061_1_1479             | 330    | KJ588061        | <i>Pseudomonas pseudoalcaligenes</i> strain P55 16S ribosomal RNA gene, partial sequence    | 26-Apr-14     | 4-Jan-18      | 1       |     | Pseudomonas pseudoalcaligenes                                                 |            | <i>Pseudomonas pseudoalcaligenes</i> | 1479   | 0           | P55             | genomic DNA |         | soil                                                                                                   | 1         | 1479    | FALSE   | ncbi_filtered | 330     |
| LC339940_1_1529             | 330    | LC339940        | <i>Pseudomonas pseudoalcaligenes</i> strain Hiro-2 16S ribosomal RNA, partial sequence      | 1-Dec-17      | 4-Jan-18      | 1       |     | Pseudomonas pseudoalcaligenes                                                 |            | <i>Pseudomonas pseudoalcaligenes</i> | 1529   | 0           | Hiro-2          | genomic DNA |         | deep marine sediment                                                                                   | 1         | 1529    | FALSE   | ncbi_filtered | 330     |
| AY364329_1_1403             | 358    | AY364329        | <i>Agrobacterium tumefaciens</i> strain UP-3 16S ribosomal RNA gene, partial sequence       | 1-Sep-03      | 4-Jan-18      | 1       |     | Agrobacterium tumefaciens (Rhizobium radiobacter)                             |            | <i>Agrobacterium tumefaciens</i>     | 1403   | 0           | UP-3            | genomic DNA |         |                                                                                                        | 1         | 1403    | FALSE   | ncbi_filtered | 358     |
| EU118772_1_1490             | 358    | EU118772        | <i>Agrobacterium tumefaciens</i> strain AGL 3 16S ribosomal RNA gene, partial sequence      | 17-Sep-07     | 4-Jan-18      | 1       |     | Agrobacterium tumefaciens (Rhizobium radiobacter)                             |            | <i>Agrobacterium tumefaciens</i>     | 1390   | 0           | AGL 3           | genomic DNA |         | contaminated soil at a metallurgic site                                                                | 1         | 1390    | FALSE   | ncbi_filtered | 358     |
| GU580896_1_1319             | 358    | GU580896        | <i>Agrobacterium tumefaciens</i> strain F268 16S ribosomal RNA gene, partial sequence       | 13-Dec-12     | 4-Jan-18      | 1       |     | Agrobacterium tumefaciens (Rhizobium radiobacter)                             |            | <i>Agrobacterium tumefaciens</i>     | 1419   | 0           | F268            | genomic DNA |         |                                                                                                        | 1         | 1419    | FALSE   | ncbi_filtered | 358     |
| JG659883_1_1421             | 358    | JG659883        | <i>Agrobacterium tumefaciens</i> strain R7-522 16S ribosomal RNA gene, partial sequence     | 23-Dec-15     | 4-Jan-18      | 1       |     | Agrobacterium tumefaciens (Agrobacterium radiobacter = Rhizobium radiobacter) |            | <i>Agrobacterium tumefaciens</i>     | 1421   | 0           | R7-522          | genomic DNA |         | plant tissue                                                                                           | 1         | 1421    | FALSE   | ncbi_filtered | 358     |
| KY874047_1_1366             | 358    | KY874047        | <i>Agrobacterium tumefaciens</i> strain CDF1 16S ribosomal RNA gene, partial sequence       | 10-Apr-17     | 4-Jan-18      | 1       |     | Agrobacterium tumefaciens (Agrobacterium radiobacter = Rhizobium radiobacter) |            | <i>Agrobacterium tumefaciens</i>     | 1366   | 0           | CD1             | genomic DNA |         |                                                                                                        | 1         | 1366    | FALSE   | ncbi_filtered | 358     |
| D12791_1_1438               | 381    | D12791          | <i>Mesorhizobium loti</i> gene for 16S rRNA, strain: IAM 13588                              | 27-Sep-07     | 4-Jan-18      | 1       |     | Mesorhizobium loti                                                            |            | <i>Mesorhizobium loti</i>            | 1438   | 7           | IAM 13588       | genomic DNA |         |                                                                                                        | 1         | 1438    | FALSE   | ncbi_filtered | 381     |
| HQ424924_1_1217             | 381    | HQ424924        | <i>Mesorhizobium loti</i> strain UC3 16S ribosomal RNA gene, partial sequence               | 4-May-11      | 4-Jan-18      | 1       |     | Mesorhizobium loti                                                            |            | <i>Mesorhizobium loti</i>            | 1217   | 0           | UC3             | genomic DNA |         | root nodules                                                                                           | 1         | 1217    | FALSE   | ncbi_filtered | 381     |
| NC_127101000026_66788_68277 | 381    | NC_127101000026 | <i>Mesorhizobium loti</i> strain NZP2014 contig_9, whole genome shotgun sequence            | 5-Apr-17      | 4-Jan-18      | 1       |     | Mesorhizobium loti                                                            | WGS,RefSeq | <i>Mesorhizobium loti</i>            | 1490   | 0           | NZP2014         | genomic DNA |         |                                                                                                        | 66788     | 68277   | FALSE   | ncbi_filtered | 381     |
| U50165_1_1480               | 93548  | U50165          | <i>Mesorhizobium loti</i> strain R8Bb 16S ribosomal RNA gene, partial sequence              | 9-Sep-96      | 4-Jan-18      | 1       |     | Mesorhizobium loti R8Bb                                                       |            | <i>Mesorhizobium loti</i> R8Bb       | 1480   | 0           | R8Bb, USDA 3462 | genomic DNA |         |                                                                                                        | 1         | 1480    | FALSE   | ncbi_filtered | 381     |
| X67230_1_1437               | 381    | X67230          | <i>Mesorhizobium loti</i> strain LMG 4284 16S ribosomal RNA, 16S rRNA gene                  | 14-Apr-04     | 4-Jan-18      | 1       |     | Mesorhizobium loti                                                            |            | <i>Mesorhizobium loti</i>            | 1437   | 1           | LMG 4284        | genomic DNA |         |                                                                                                        | 1         | 1437    | FALSE   | ncbi_filtered | 381     |
| AF150804_1_1452             | 426    | AF150804        | <i>Methylosinus trichosporium</i> 16S ribosomal RNA gene, partial sequence                  | 26-Jul-16     | 4-Jan-18      | 1       |     | Methylosinus trichosporium                                                    |            | <i>Methylosinus trichosporium</i>    | 1452   | 0           |                 | genomic DNA |         |                                                                                                        | 1         | 1452    | FALSE   | ncbi_filtered | 426     |
| AJ458477_1_1405             | 426    | AJ458477        | <i>Methylosinus trichosporium</i> partial 16S rRNA gene, strain SM6 (MV 6-3060)             | 1-Jul-02      | 4-Jan-18      | 1       |     | Methylosinus trichosporium                                                    |            | <i>Methylosinus trichosporium</i>    | 1405   | 0           | SM6 (MV 6-3060) | genomic DNA |         | water                                                                                                  | 1         | 1405    | FALSE   | ncbi_filtered | 426     |
| AJ458492_1_1388             | 426    | AJ458492        | <i>Methylosinus trichosporium</i> partial 16S rRNA gene, strain M23                         | 1-Jul-02      | 4-Jan-18      | 1       |     | Methylosinus trichosporium                                                    |            | <i>Methylosinus trichosporium</i>    | 1388   | 0           | M23             | genomic DNA |         | mangrove roots                                                                                         | 1         | 1388    | FALSE   | ncbi_filtered | 426     |
| AJ458496_1_1404             | 426    | AJ458496        | <i>Methylosinus trichosporium</i> partial 16S rRNA gene, strain KS24b                       | 1-Jul-02      | 4-Jan-18      | 1       |     | Methylosinus trichosporium                                                    |            | <i>Methylosinus trichosporium</i>    | 1404   | 0           | KS24b           | genomic DNA |         | ooc surface sediment                                                                                   | 1         | 1404    | FALSE   | ncbi_filtered | 426     |
| KC353469_1_1409             | 426    | KC353469        | <i>Methylosinus trichosporium</i> strain NT85 16S ribosomal RNA gene, partial sequence      | 24-Feb-13     | 4-Jan-18      | 1       |     | Methylosinus trichosporium                                                    |            | <i>Methylosinus trichosporium</i>    | 1409   | 0           | NT85            | genomic DNA |         | methane-rich landfill sediment                                                                         | 1         | 1409    | FALSE   | ncbi_filtered | 426     |
| AJ458468_1_1401             | 428    | AJ458468        | <i>Methylosinus sporium</i> partial 16S rRNA gene, strain 44/2                              | 1-Jul-02      | 4-Jan-18      | 1       |     | Methylosinus sporium                                                          |            | <i>Methylosinus sporium</i>          | 1401   | 0           | 44/2            | genomic DNA |         | water from spring bog                                                                                  | 1         | 1401    | FALSE   | ncbi_filtered | 428     |
| AJ458478_1_1401             | 428    | AJ458478        | <i>Methylosinus sporium</i> partial 16S rRNA gene, strain SE2                               | 1-Jul-02      | 4-Jan-18      | 1       |     | Methylosinus sporium                                                          |            | <i>Methylosinus sporium</i>          | 1401   | 0           | SE2             | genomic DNA |         | water                                                                                                  | 1         | 1401    | FALSE   | ncbi_filtered | 428     |
| AJ458486_1_1407             | 428    | AJ458486        | <i>Methylosinus sporium</i> partial 16S rRNA gene, strain B                                 | 1-Jul-02      | 4-Jan-18      | 1       |     | Methylosinus sporium                                                          |            | <i>Methylosinus sporium</i>          | 1407   | 1           | B               | genomic DNA |         | lagoon water                                                                                           | 1         | 1407    | FALSE   | ncbi_filtered | 428     |
| AJ458489_1_1405             | 428    | AJ458489        | <i>Methylosinus sporium</i> partial 16S rRNA gene, strain F10/1b                            | 1-Jul-02      | 4-Jan-18      | 1       |     | Methylosinus sporium                                                          |            | <i>Methylosinus sporium</i>          | 1405   | 0           | F10/1b          | genomic DNA |         | surface sediment of dystrophic peat bog lake                                                           | 1         | 1405    | FALSE   | ncbi_filtered | 428     |
| A                           |        |                 |                                                                                             |               |               |         |     |                                                                               |            |                                      |        |             |                 |             |         |                                                                                                        |           |         |         |               |         |

| seqname                      | tax_id  | accession       | description                                                                                                   | modified_date | download_date | version | num_source | keywords                           | organism                                         | length | ambig_count | strain      | mol_type    | isolate          | isolation_source | seq_start | seq_stop | is_type | collection    | species |
|------------------------------|---------|-----------------|---------------------------------------------------------------------------------------------------------------|---------------|---------------|---------|------------|------------------------------------|--------------------------------------------------|--------|-------------|-------------|-------------|------------------|------------------|-----------|----------|---------|---------------|---------|
| AF005165_1_1445              | 477     | AF005165        | Moraxella lacunata 16S ribosomal RNA gene, partial sequence                                                   | 15-Apr-98     | 4-Jan-18      | 1       |            |                                    | Moraxella lacunata                               | 1445   | 0           | E2371       | genomic DNA |                  |                  | 1         | 1445     | FALSE   | ncbi_filtered | 477     |
| AF005168_1_1445              | 477     | AF005168        | Moraxella lacunata 16S ribosomal RNA gene, partial sequence                                                   | 15-Apr-98     | 4-Jan-18      | 1       |            |                                    | Moraxella lacunata                               | 1445   | 0           | A947        | genomic DNA |                  |                  | 1         | 1445     | FALSE   | ncbi_filtered | 477     |
| NZ_BJUK01000202_3762_5302    | 1223506 | NZ_BJUK01000202 | Moraxella lacunata NBRC 102154, whole genome shotgun sequence                                                 | 12-Apr-17     | 4-Jan-18      | 1       |            | WGS,STANDARD_DRAFT,RefSeq          | Moraxella lacunata NBRC 102154                   | 1541   | 0           | NBRC 102154 | genomic DNA |                  |                  | 3762      | 5302     | TRUE    | ncbi_filtered | 477     |
| NZ_LZDR01000047_4047_5581    | 477     | NZ_LZDR01000047 | Moraxella lacunata strain CCUG 65142 contig_28, whole genome shotgun sequence                                 | 13-Apr-17     | 4-Jan-18      | 1       |            | WGS,RefSeq                         | Moraxella lacunata                               | 1535   | 0           | CCUG 65142  | genomic DNA | cornea           |                  | 4047      | 5581     | FALSE   | ncbi_filtered | 477     |
| AF005176_1_1445              | 478     | AF005176        | Moraxella nonliquefaciens 16S ribosomal RNA gene, partial sequence                                            | 15-Apr-98     | 4-Jan-18      | 1       |            |                                    | Moraxella nonliquefaciens                        | 1445   | 0           | P2581/88    | genomic DNA |                  |                  | 1         | 1445     | FALSE   | ncbi_filtered | 478     |
| AY526574_1_1451              | 478     | AY526574        | Moraxella nonliquefaciens isolate MDU1744 16S ribosomal RNA gene, partial sequence                            | 9-Aug-04      | 4-Jan-18      | 1       |            |                                    | Moraxella nonliquefaciens                        | 1451   | 1           |             | genomic DNA | MDU1744          |                  | 1         | 1451     | FALSE   | ncbi_filtered | 478     |
| NZ_117799_1_1502             | 478     | NZ_117799       | Moraxella nonliquefaciens strain CCUG 348 16S ribosomal RNA gene, partial sequence                            | 3-Feb-15      | 4-Jan-18      | 1       |            | RefSeq                             | Moraxella nonliquefaciens                        | 1502   | 0           | CCUG 348    | rRNA        |                  |                  | 1         | 1502     | TRUE    | ncbi_filtered | 478     |
| NZ_LXTW01000013_4312_5847    | 478     | NZ_LXTW01000013 | Moraxella nonliquefaciens strain CCUG 348 contig_20, whole genome shotgun sequence                            | 13-Apr-17     | 4-Jan-18      | 1       |            | WGS,RefSeq                         | Moraxella nonliquefaciens                        | 1536   | 0           | CCUG 348    | genomic DNA | nose swab        |                  | 4312      | 5847     | TRUE    | ncbi_filtered | 478     |
| AY831725_1_1477              | 483     | AY831725        | Neisseria cinerea 16S ribosomal RNA gene, partial sequence                                                    | 14-Dec-04     | 4-Jan-18      | 1       |            |                                    | Neisseria cinerea                                | 1477   | 0           |             | genomic DNA |                  |                  | 1         | 1477     | FALSE   | ncbi_filtered | 483     |
| KF646791_1_1486              | 483     | KF646791        | Neisseria cinerea strain 402128/2013 16S ribosomal RNA gene, partial sequence                                 | 25-Nov-13     | 4-Jan-18      | 1       |            |                                    | Neisseria cinerea                                | 1486   | 0           | 402128/2013 | genomic DNA |                  |                  | 1         | 1486     | FALSE   | ncbi_filtered | 483     |
| NZ_ACDY02000011_18002_19552  | 546262  | NZ_ACDY02000011 | Neisseria cinerea ATCC 14685 N_cinerea-1.0.2.Contig1.1, whole genome shotgun sequence                         | 7-Apr-17      | 4-Jan-18      | 1       |            | WGS,RefSeq                         | Neisseria cinerea ATCC 14685                     | 1551   | 0           | ATCC 14685  | genomic DNA |                  |                  | 18002     | 19552    | TRUE    | ncbi_filtered | 483     |
| KC178505_1_1406              | 484     | KC178505        | Neisseria flavescens strain 1258a 16S ribosomal RNA gene, partial sequence                                    | 5-Feb-13      | 4-Jan-18      | 1       |            |                                    | Neisseria flavescens                             | 1406   | 0           | 1258a       | genomic DNA |                  |                  | 1         | 1406     | FALSE   | ncbi_filtered | 484     |
| KF737271_1_1453              | 484     | KF737271        | Neisseria flavescens strain CHDC B580 16S ribosomal RNA gene, partial sequence                                | 14-Jan-14     | 4-Jan-18      | 1       |            |                                    | Neisseria flavescens                             | 1453   | 0           | CHDC B580   | genomic DNA |                  |                  | 1         | 1453     | FALSE   | ncbi_filtered | 484     |
| KY347879_1_1284              | 484     | KY347879        | Neisseria flavescens strain HKG 258 16S ribosomal RNA gene, partial sequence                                  | 16-Apr-17     | 4-Jan-18      | 1       |            |                                    | Neisseria flavescens                             | 1284   | 0           | HKG 258     | genomic DNA |                  |                  | 1         | 1284     | FALSE   | ncbi_filtered | 484     |
| KY347882_1_1286              | 484     | KY347882        | Neisseria flavescens strain HKG 261 16S ribosomal RNA gene, partial sequence                                  | 16-Apr-17     | 4-Jan-18      | 1       |            |                                    | Neisseria flavescens                             | 1286   | 0           | HKG 261     | genomic DNA |                  |                  | 1         | 1286     | FALSE   | ncbi_filtered | 484     |
| NZ_ACQV01000002_9069_10621   | 596320  | NZ_ACQV01000002 | Neisseria flavescens SK114 ctg111840793883, whole genome shotgun sequence                                     | 7-Apr-17      | 4-Jan-18      | 1       |            | WGS,RefSeq                         | Neisseria flavescens SK114                       | 1553   | 0           | SK114       | genomic DNA |                  |                  | 9069      | 10621    | FALSE   | ncbi_filtered | 484     |
| AF146369_1_1385              | 485     | AF146369        | Neisseria gonorrhoeae 16S ribosomal RNA gene, partial sequence                                                | 17-Jun-99     | 4-Jan-18      | 1       |            |                                    | Neisseria gonorrhoeae                            | 1385   | 1           | 76993       | genomic DNA |                  |                  | 1         | 1385     | FALSE   | ncbi_filtered | 485     |
| ATPE01000073_254_1807        | 1352531 | ATPE01000073    | Neisseria gonorrhoeae SK708 contig164, whole genome shotgun sequence                                          | 10-Jun-15     | 4-Jan-18      | 1       |            | WGS                                | Neisseria gonorrhoeae SK708                      | 1585   | 0           | SK708       | genomic DNA |                  |                  | 254       | 1807     | FALSE   | ncbi_filtered | 485     |
| MF480363_1_1533              | 485     | MF480363        | Neisseria gonorrhoeae strain 46_16 16S ribosomal RNA gene, partial sequence                                   | 15-Feb-18     | 27-Feb-18     | 1       |            |                                    | Neisseria gonorrhoeae                            | 1533   | 0           | 46_16       | genomic DNA |                  |                  | 1         | 1533     | FALSE   | ncbi_filtered | 485     |
| NZ_Q22240_172405_1726053     | 528354  | NZ_Q22240       | Neisseria gonorrhoeae MS11, complete genome                                                                   | 24-Mar-17     | 4-Jan-18      | 1       |            | RefSeq                             | Neisseria gonorrhoeae MS11                       | 1549   | 0           | MS11        | genomic DNA |                  |                  | 172405    | 1726053  | FALSE   | ncbi_filtered | 485     |
| NZ_CQOI01000012_45903_47453  | 485     | NZ_CQOI01000012 | Neisseria gonorrhoeae strain GCG5129, whole genome shotgun sequence                                           | 11-Apr-17     | 4-Jan-18      | 1       |            | WGS,RefSeq                         | Neisseria gonorrhoeae                            | 1551   | 0           | GCG5129     | genomic DNA |                  |                  | 45903     | 47453    | FALSE   | ncbi_filtered | 485     |
| GU561416_1_1429              | 487     | GU561416        | Neisseria meningitidis strain TTE14 16S ribosomal RNA gene, partial sequence                                  | 13-Mar-10     | 4-Jan-18      | 1       |            |                                    | Neisseria meningitidis                           | 1429   | 0           | TTE14       | genomic DNA |                  |                  | 1         | 1429     | FALSE   | ncbi_filtered | 487     |
| KC561932_1_1322              | 487     | KC561932        | Neisseria meningitidis strain C15240 16S ribosomal RNA gene, partial sequence                                 | 25-Sep-13     | 4-Jan-18      | 1       |            |                                    | Neisseria meningitidis                           | 1322   | 0           | C15240      | genomic DNA |                  |                  | 1         | 1322     | FALSE   | ncbi_filtered | 487     |
| NZ_017515_608844_608395      | 935593  | NZ_017515       | Neisseria meningitidis M04-240196, complete genome                                                            | 21-Mar-17     | 4-Jan-18      | 1       |            | RefSeq                             | Neisseria meningitidis M04-240196                | 1552   | 0           | M04-240196  | genomic DNA |                  |                  | 608844    | 608395   | FALSE   | ncbi_filtered | 487     |
| NZ_CP016658_1160156_1161706  | 487     | NZ_CP016658     | Neisseria meningitidis strain M24730, complete genome                                                         | 21-Mar-17     | 4-Jan-18      | 1       |            | RefSeq                             | Neisseria meningitidis                           | 1551   | 0           | M24730      | genomic DNA |                  |                  | 1160156   | 1161706  | FALSE   | ncbi_filtered | 487     |
| NZ_JUTTO1000108_337_1887     | 487     | NZ_JUTTO1000108 | Neisseria meningitidis strain 768_NMEN 445_6341_373068_271_348, whole genome shotgun sequence                 | 17-Mar-17     | 4-Jan-18      | 1       |            | WGS,RefSeq                         | Neisseria meningitidis                           | 1551   | 0           | 768_NMEN    | genomic DNA |                  |                  | 337       | 1887     | FALSE   | ncbi_filtered | 487     |
| AB910739_1_1502              | 488     | AB910739        | Neisseria mucosa gene for 16S ribosomal RNA, partial sequence                                                 | 21-Feb-14     | 4-Jan-18      | 1       |            |                                    | Neisseria mucosa                                 | 1502   | 0           | JCM 12992   | genomic DNA |                  |                  | 1         | 1502     | TRUE    | ncbi_filtered | 488     |
| KC178470_1_1407              | 488     | KC178470        | Neisseria mucosa strain 3742 16S ribosomal RNA gene, partial sequence                                         | 5-Feb-13      | 4-Jan-18      | 1       |            |                                    | Neisseria mucosa                                 | 1407   | 0           | 3742        | genomic DNA |                  |                  | 1         | 1407     | FALSE   | ncbi_filtered | 488     |
| KC178480_1_1406              | 488     | KC178480        | Neisseria mucosa strain 5305b 16S ribosomal RNA gene, partial sequence                                        | 5-Feb-13      | 4-Jan-18      | 1       |            |                                    | Neisseria mucosa                                 | 1406   | 0           | 5305b       | genomic DNA |                  |                  | 1         | 1406     | FALSE   | ncbi_filtered | 488     |
| KC178491_1_1406              | 488     | KC178491        | Neisseria mucosa strain 5567a 16S ribosomal RNA gene, partial sequence                                        | 5-Feb-13      | 4-Jan-18      | 1       |            |                                    | Neisseria mucosa                                 | 1406   | 2           | 5567a       | genomic DNA |                  |                  | 1         | 1406     | FALSE   | ncbi_filtered | 488     |
| X0096322_1_1464              | 488     | X0096322        | Neisseria mucosa culture-collection KCOM2642 16S ribosomal RNA gene, partial sequence                         | 26-Dec-16     | 4-Jan-18      | 1       |            |                                    | Neisseria mucosa                                 | 1464   | 1           | ChDC PV-A84 | genomic DNA |                  |                  | 1         | 1464     | FALSE   | ncbi_filtered | 488     |
| KT591873_1_1416              | 90367   | KT591873        | Neisseria elongata subsp. nitroreducens strain NE31508527 16S ribosomal RNA gene, partial sequence            | 8-Sep-15      | 4-Jan-18      | 1       |            |                                    | Neisseria elongata subsp. nitroreducens          | 1416   | 0           | NE31508527  | genomic DNA |                  |                  | 1         | 1416     | FALSE   | ncbi_filtered | 495     |
| NR_025893_1_1476             | 214482  | NR_025893       | Neisseria elongata subsp. elongata 16S ribosomal RNA, partial sequence                                        | 24-Oct-17     | 4-Jan-18      | 1       |            | RefSeq;ribosomal RNA small subunit | Neisseria elongata subsp. elongata               | 1476   | 5           | ATCC 25295  | rRNA        |                  |                  | 1         | 1476     | TRUE    | ncbi_filtered | 495     |
| NZ_CP007726_1614659_1616209  | 546263  | NZ_CP007726     | Neisseria elongata subsp. glycolytica ATCC 29315, complete genome                                             | 10-Apr-17     | 4-Jan-18      | 1       |            |                                    | Neisseria elongata subsp. glycolytica ATCC 29315 | 1551   | 0           | ATCC 29315  | genomic DNA | Throat           |                  | 1614659   | 1616209  | TRUE    | ncbi_filtered | 495     |
| NZ_FPFS01000021_4322_5872    | 214482  | NZ_FPFS01000021 | Neisseria elongata subsp. elongata 16S ribosomal RNA, partial sequence                                        | 14-Apr-17     | 4-Jan-18      | 1       |            | WGS,RefSeq                         | Neisseria elongata subsp. elongata               | 1551   | 0           | ATCC 25295  | genomic DNA |                  |                  | 4322      | 5872     | TRUE    | ncbi_filtered | 495     |
| NZ_JVVT01000083_4321_5871    | 88199   | NZ_JVVT01000083 | Neisseria elongata subsp. glycolytica strain 1279_NMEN 560_9530_980582_182_150, whole genome shotgun sequence | 10-Apr-17     | 4-Jan-18      | 1       |            | WGS,RefSeq                         | Neisseria elongata subsp. glycolytica            | 1551   | 0           | 1279_NMEN   | genomic DNA |                  |                  | 4321      | 5871     | FALSE   | ncbi_filtered | 495     |
| AF320620_1_1476              | 539     | AF320620        | Eikenella corrodens 16S ribosomal RNA gene, partial sequence                                                  | 2-Jan-01      | 4-Jan-18      | 1       |            |                                    | Eikenella corrodens                              | 1476   | 1           |             | genomic DNA | 1664276          |                  | 1         | 1476     | FALSE   | ncbi_filtered | 539     |
| GQ422740_1_1516              | 539     | GQ422740        | Eikenella corrodens strain Moore D25 16S ribosomal RNA gene, partial sequence                                 | 14-Sep-09     | 4-Jan-18      | 1       |            |                                    | Eikenella corrodens                              | 1516   | 0           | Moore D25   | genomic DNA |                  |                  | 1         | 1516     | FALSE   | ncbi_filtered | 539     |
| KY933769_1_1503              | 539     | KY933769        | Eikenella corrodens strain CHDC B230 16S ribosomal RNA gene, partial sequence                                 | 12-Jun-15     | 4-Jan-18      | 1       |            |                                    | Eikenella corrodens                              | 1503   | 1           | CHDC B230   | genomic DNA |                  |                  | 1         | 1503     | FALSE   | ncbi_filtered | 539     |
| NZ_EC097319_3806_3357        | 546274  | NZ_EC097319     | Eikenella corrodens ATCC 23834 SclD3, whole genome shotgun sequence                                           | 30-Mar-17     | 4-Jan-18      | 1       |            | WGS,RefSeq                         | Eikenella corrodens ATCC 23834                   | 1552   | 0           | ATCC 23834  | genomic DNA |                  |                  | 3806      | 3357     | TRUE    | ncbi_filtered | 539     |
| NZ_LXSG01000001_3785_3335    | 539     | NZ_LXSG01000001 | Eikenella corrodens strain NML04-0072 Eikcor_contig000001, whole genome shotgun sequence                      | 5-Apr-17      | 4-Jan-18      | 1       |            | WGS,RefSeq                         | Eikenella corrodens                              | 1551   | 0           | NML04-0072  | genomic DNA |                  |                  | 3785      | 5335     | FALSE   | ncbi_filtered | 539     |
| KY434109_1_1501              | 546     | KY434109        | Citrobacter freundii strain MFC-pH7 02 16S ribosomal RNA gene, partial sequence                               | 27-Nov-17     | 4-Jan-18      | 1       |            |                                    | Citrobacter freundii                             | 1501   | 0           | MFC-pH7 02  | genomic DNA |                  |                  | 1         | 1501     | FALSE   | ncbi_filtered | 546     |
| KY575142_1_1366              | 546     | KY575142        | Citrobacter freundii strain T150 16S ribosomal RNA gene, partial sequence                                     | 12-Feb-17     | 4-Jan-18      | 1       |            |                                    | Citrobacter freundii                             | 1366   | 0           | T150        | genomic DNA | Human-Skin       |                  | 1         | 1366     | FALSE   | ncbi_filtered | 546     |
| LN864409_1_1450              | 546     | LN864409        | Citrobacter freundii partial 16S rRNA gene, strain SA-1                                                       | 21-Jan-16     | 4-Jan-18      | 1       |            |                                    | Citrobacter freundii                             | 1450   | 0           | SA-1        | genomic DNA | Chimpanzee stool |                  | 1         | 1450     | FALSE   | ncbi_filtered | 546     |
| MG011554_1_1453              | 546     | MG011554        | Citrobacter freundii strain HIW2200909 16S ribosomal RNA gene, partial sequence                               | 1-Nov-17      | 4-Jan-18      | 1       |            |                                    | Citrobacter freundii                             | 1453   | 0           | HIW2200909  | genomic DNA | water            |                  | 1         | 1453     | FALSE   | ncbi_filtered | 546     |
| NZ_IRT01000053_554339_555893 | 546     | NZ_IRT01000053  | Citrobacter freundii strain RU2 BH15 NODE_63_5001169, whole genome shotgun sequence                           | 4-Apr-17      | 4-Jan-18      | 1       |            | WGS,RefSeq                         | Citrobacter freundii                             | 1555   | 0           | RU2 BH15    | genomic DNA |                  |                  | 554339    | 555893   | FALSE   | ncbi_filtered | 546     |
| EIUS5208_1_1501              | 548     | EIUS5208        | Enterobacter aerogenes strain CTS930 16S ribosomal RNA gene, partial sequence                                 | 9-Sep-14      | 4-Jan-18      | 1       |            |                                    | Klebsiella aerogenes                             | 1501   | 0           | CTS930      | genomic DNA |                  |                  | 1         | 1501     | FALSE   | ncbi_filtered | 548     |
| KR611991_1_1438              | 548     | KR611991        | Enterobacter aerogenes strain RPR-CCFL1 16S ribosomal RNA gene, partial sequence                              | 17-Jun-15     | 4-Jan-18      | 1       |            |                                    | Klebsiella aerogenes                             | 1438   | 1           | RPR-CCFL1   | genomic DNA |                  |                  | 1         | 1438     | FALSE   | ncbi_filtered | 548     |
| MF185383_1_1499              | 548     | MF185383        | Klebsiella aerogenes strain RPWL15 16S ribosomal RNA gene, partial sequence                                   | 27-Aug-17     | 4-Jan-18      | 1       |            |                                    | Klebsiella aerogenes                             | 1499   | 0           | RPWL15      | genomic DNA |                  |                  | 1         | 1499     | FALSE   | ncbi_filtered | 548     |
| NC_020181_3310217_3311760    | 935296  | NC_020181       | Enterobacter aerogenes EA1509E complete genome                                                                | 1-Apr-17      | 4-Jan-18      | 1       |            | RefSeq                             | Klebsiella aerogenes EA1509E                     | 1544   | 0           | EA1509E     | genomic DNA |                  |                  | 3310217   | 3311760  | FALSE   | ncbi_filtered | 548     |
| NZ_XTQ01000059_219_1771      | 548     | NZ_XTQ01000059  | Klebsiella aerogenes strain DDE1 rep_c59, whole genome shotgun sequence                                       | 3-Apr-17      | 4-Jan-18      | 1       |            | WGS,RefSeq                         | Klebsiella aerogenes                             | 1553   | 0           | DDE1        | genomic DNA | Root tissue      |                  | 219       | 1771     | FALSE   | ncbi_filtered | 548     |
| GQ374472_1_1493              | 549     | GQ374472        | Pantoea agglomerans strain X12 16S ribosomal RNA gene, partial sequence                                       | 23-Aug-09     | 4-Jan-18      | 1       |            |                                    | Pantoea agglomerans                              | 1493   | 0           | X12         | genomic DNA |                  |                  | 1         | 1493     | FALSE   | ncbi_filtered | 549     |
| HM130694_1_1494              | 549     | HM130694        | Pantoea agglomerans strain BJCP3 16S ribosomal RNA gene, partial sequence                                     | 30-Jun-10     | 4-Jan-18      | 1       |            |                                    | Pantoea agglomerans                              | 1494   | 0           | BJCP3       | genomic DNA |                  |                  | 1         | 1494     | FALSE   |               |         |

| seqname                        | tax_id  | accession       | description                                                                          | modified_date | download_date | version | num | source | keywords                        | organism                         | length | ambig_count | strain                         | mol_type    | isolate | isolation_source                                                                         | seq_start | seq_stop | is_type | collection    | species |
|--------------------------------|---------|-----------------|--------------------------------------------------------------------------------------|---------------|---------------|---------|-----|--------|---------------------------------|----------------------------------|--------|-------------|--------------------------------|-------------|---------|------------------------------------------------------------------------------------------|-----------|----------|---------|---------------|---------|
| K0573718_1_1364                | 562     | K0573718        | Escherichia coli strain CZUB2 16S ribosomal RNA gene, partial sequence               | 22-Apr-17     | 4-Jan-18      | 1       |     |        |                                 | Escherichia coli                 | 1364   | 7           | CZUB2                          | genomic DNA |         | Camel_reproductive_tract,Uterus.                                                         | 1         | 1364     | FALSE   | ncbi_filtered | 562     |
| NZ_AJFN01000063_134485_135686  | 868152  | NZ_AJFN01000063 | Escherichia coli DECAD gncDEC4D.contig.62_1, whole genome shotgun sequence           | 23-Nov-17     | 4-Jan-18      | 1       |     |        | WGS,RefSeq                      | Escherichia coli DECAD           | 1202   | 0           | DECAD                          | genomic DNA |         | calf                                                                                     | 134485    | 135686   | FALSE   | ncbi_filtered | 562     |
| NZ_FZEX01000065_3259_4814      | 562     | NZ_FZEX01000065 | Escherichia coli isolate F1_22A, whole genome shotgun sequence                       | 23-Sep-17     | 4-Jan-18      | 1       |     |        | WGS,RefSeq                      | Escherichia coli                 | 1556   | 6           |                                | genomic DNA | F1_22A  | Pig rectal swab                                                                          | 3259      | 4814     | FALSE   | ncbi_filtered | 562     |
| FN433037_1_1478                | 564     | FN433037        | Escherichia fergusonii partial 16S rRNA gene, isolate CCM27B                         | 30-Jul-09     | 4-Jan-18      | 1       |     |        |                                 | Escherichia fergusonii           | 1478   | 0           |                                | genomic DNA | CCM27B  | Elephant dung sample                                                                     | 1         | 1478     | FALSE   | ncbi_filtered | 564     |
| KP252795_1_1335                | 564     | KP252795        | Escherichia fergusonii strain VMB14 16S ribosomal RNA gene, partial sequence         | 25-Sep-13     | 4-Jan-18      | 1       |     |        |                                 | Escherichia fergusonii           | 1335   | 0           | VMB14                          | genomic DNA |         |                                                                                          | 1         | 1335     | FALSE   | ncbi_filtered | 564     |
| KJ626263_1_1394                | 564     | KJ626263        | Escherichia fergusonii strain E2 16S ribosomal RNA gene, partial sequence            | 30-Mar-15     | 4-Jan-18      | 1       |     |        |                                 | Escherichia fergusonii           | 1394   | 0           | E2                             | genomic DNA |         |                                                                                          | 1         | 1394     | FALSE   | ncbi_filtered | 564     |
| KR82244_1_1479                 | 564     | KR82244         | Escherichia fergusonii strain Sum4 16S ribosomal RNA gene, partial sequence          | 31-Oct-15     | 4-Jan-18      | 1       |     |        |                                 | Escherichia fergusonii           | 1479   | 0           | Sum4                           | genomic DNA |         | urine                                                                                    | 1         | 1479     | FALSE   | ncbi_filtered | 564     |
| KX980484_1_1451                | 564     | KX980484        | Escherichia fergusonii strain RPK62 16S ribosomal RNA gene, partial sequence         | 15-Jan-17     | 4-Jan-18      | 1       |     |        |                                 | Escherichia fergusonii           | 1451   | 0           | RPK62                          | genomic DNA |         |                                                                                          | 1         | 1451     | FALSE   | ncbi_filtered | 564     |
| HQ407263_1_1507                | 565     | HQ407263        | Escherichia hermannii strain T88 16S ribosomal RNA gene, partial sequence            | 6-Mar-12      | 4-Jan-18      | 1       |     |        |                                 | Atlantibacter hermannii          | 1507   | 0           | T88                            | genomic DNA |         | midgut                                                                                   | 1         | 1507     | FALSE   | ncbi_filtered | 565     |
| KU510074_1_1428                | 565     | KU510074        | Escherichia hermannii strain ES2 16S ribosomal RNA gene, partial sequence            | 19-Jan-16     | 4-Jan-18      | 1       |     |        |                                 | Atlantibacter hermannii          | 1428   | 0           | ES2                            | genomic DNA |         | atmospheric particulate matter                                                           | 1         | 1428     | FALSE   | ncbi_filtered | 565     |
| MG706150_1_1427                | 565     | MG706150        | Atlantibacter hermannii strain SHCOPD2017-1 16S ribosomal RNA gene, partial sequence | 26-Dec-17     | 4-Jan-18      | 1       |     |        |                                 | Atlantibacter hermannii          | 1427   | 0           | SHCOPD2017-1                   | genomic DNA |         |                                                                                          | 1         | 1427     | FALSE   | ncbi_filtered | 565     |
| MG890239_1_1388                | 565     | MG890239        | Atlantibacter hermannii strain AB3-SW6 16S ribosomal RNA gene, partial sequence      | 9-Feb-18      | 14-Feb-18     | 1       |     |        |                                 | Atlantibacter hermannii          | 1388   | 0           | AB3-SW6                        | genomic DNA |         |                                                                                          | 1         | 1388     | FALSE   | ncbi_filtered | 565     |
| XK0675_1_1445                  | 565     | XK0675          | E.hermannii 16S rRNA gene                                                            | 29-Mar-96     | 4-Jan-18      | 1       |     |        | 16S ribosomal RNA               | Atlantibacter hermannii          | 1445   | 12          |                                | genomic DNA |         |                                                                                          | 1         | 1445     | FALSE   | ncbi_filtered | 565     |
| AY253923_1_1463                | 569     | AY253923        | Hafnia alvei isolate m-49 16S ribosomal RNA gene, partial sequence                   | 15-Apr-04     | 4-Jan-18      | 1       |     |        |                                 | Hafnia alvei                     | 1463   | 6           |                                | genomic DNA | m 49    |                                                                                          | 1         | 1463     | FALSE   | ncbi_filtered | 569     |
| HQ634925_1_1293                | 569     | HQ634925        | Hafnia alvei strain 5-12 16S ribosomal RNA gene, partial sequence                    | 1-Jun-11      | 4-Jan-18      | 1       |     |        |                                 | Hafnia alvei                     | 1293   | 0           | 12-May                         | genomic DNA |         | intestinal tract                                                                         | 1         | 1293     | FALSE   | ncbi_filtered | 569     |
| JN409468_1_1448                | 569     | JN409468        | Hafnia alvei strain SP19 16S ribosomal RNA gene, partial sequence                    | 16-Oct-11     | 4-Jan-18      | 1       |     |        |                                 | Hafnia alvei                     | 1448   | 0           | SP19                           | genomic DNA |         | contaminated luncheon sausage                                                            | 1         | 1448     | FALSE   | ncbi_filtered | 569     |
| KC210872_1_1420                | 569     | KC210872        | Hafnia alvei strain H3-4 16S ribosomal RNA gene, partial sequence                    | 25-Feb-13     | 4-Jan-18      | 1       |     |        |                                 | Hafnia alvei                     | 1420   | 0           | H3-4                           | genomic DNA |         |                                                                                          | 1         | 1420     | FALSE   | ncbi_filtered | 569     |
| MF429189_1_1389                | 569     | MF429189        | Hafnia alvei strain CAU1586 16S ribosomal RNA gene, partial sequence                 | 10-Aug-17     | 4-Jan-18      | 1       |     |        |                                 | Hafnia alvei                     | 1389   | 0           | CAU1586                        | genomic DNA |         | milk                                                                                     | 1         | 1389     | FALSE   | ncbi_filtered | 569     |
| AI871858_1_1454                | 571     | AI871858        | Klebsiella oxytoca partial 16S rRNA gene, type strain SB17ST                         | 10-Feb-06     | 4-Jan-18      | 1       |     |        | 16S ribosomal RNA;16S rRNA gene | Klebsiella oxytoca               | 1454   | 2           | type strain:SB1755:AT CC 13182 | genomic DNA |         |                                                                                          | 1         | 1454     | FALSE   | ncbi_filtered | 571     |
| JF501606_1_1434                | 571     | JF501606        | Klebsiella oxytoca strain MX-26 16S ribosomal RNA gene, partial sequence             | 25-Jun-11     | 4-Jan-18      | 1       |     |        |                                 | Klebsiella oxytoca               | 1434   | 6           | MX-26                          | genomic DNA |         | rhizosphere soil                                                                         | 1         | 1434     | FALSE   | ncbi_filtered | 571     |
| NZ_CP008788_1138816_1140369    | 133852  | NZ_CP008788     | Klebsiella oxytoca K0N1H1, complete genome                                           | 21-Feb-17     | 4-Jan-18      | 1       |     |        | RefSeq                          | Klebsiella oxytoca K0N1H1        | 1554   | 0           | K0N1H1                         | genomic DNA |         | perirectal swab                                                                          | 1138816   | 1140369  | FALSE   | ncbi_filtered | 571     |
| NZ_CP011636_923038_924591      | 571     | NZ_CP011636     | Klebsiella oxytoca strain CAU1374, complete genome                                   | 21-Feb-17     | 4-Jan-18      | 1       |     |        | RefSeq                          | Klebsiella oxytoca               | 1554   | 0           | CAU1374                        | genomic DNA |         | Perirectal                                                                               | 923038    | 924591   | FALSE   | ncbi_filtered | 571     |
| NZ_K0238000_1425532_1427085    | 883116  | NZ_K0238000     | Klebsiella oxytoca 09-7231 supercont1.2, whole genome shotgun sequence               | 25-Feb-17     | 4-Jan-18      | 1       |     |        | WGS;HIGH_QUALITY_DRAFT;RefSeq   | Klebsiella oxytoca 09-7231       | 1554   | 0           | Sep-31                         | genomic DNA |         |                                                                                          | 1425532   | 1427085  | FALSE   | ncbi_filtered | 571     |
| EU078620_1_1534                | 573     | EU078620        | Klebsiella pneumoniae strain HR11 16S ribosomal RNA gene, partial sequence           | 1-Sep-07      | 4-Jan-18      | 1       |     |        |                                 | Klebsiella pneumoniae            | 1534   | 0           | HR11                           | genomic DNA |         |                                                                                          | 1         | 1534     | FALSE   | ncbi_filtered | 573     |
| GU339298_1_1498                | 573     | GU339298        | Klebsiella pneumoniae strain EH73 16S ribosomal RNA gene, partial sequence           | 7-Feb-10      | 4-Jan-18      | 1       |     |        |                                 | Klebsiella pneumoniae            | 1498   | 0           | EH73                           | genomic DNA |         | sitesite R3, 1000 m away from sties R1 and R2 at Rajkot industrial estate (control site) | 1         | 1498     | FALSE   | ncbi_filtered | 573     |
| KP100331_1_1471                | 573     | KP100331        | Klebsiella pneumoniae strain VITP2 16S ribosomal RNA gene, partial sequence          | 17-Mar-15     | 4-Jan-18      | 1       |     |        |                                 | Klebsiella pneumoniae            | 1471   | 0           | VITP2                          | genomic DNA |         | saliva                                                                                   | 1         | 1471     | FALSE   | ncbi_filtered | 573     |
| KV417867_1_1482                | 573     | KV417867        | Klebsiella pneumoniae strain KL1 16S ribosomal RNA gene, partial sequence            | 13-Sep-17     | 4-Jan-18      | 1       |     |        |                                 | Klebsiella pneumoniae            | 1482   | 0           | KL1                            | genomic DNA |         | activated sludge from sewage treatment plant                                             | 1         | 1482     | FALSE   | ncbi_filtered | 573     |
| NZ_NGTO1000001_5126454_5128007 | 573     | NZ_NGTO1000001  | Klebsiella pneumoniae strain MGH158 scaffold00001, whole genome shotgun sequence     | 24-May-17     | 4-Jan-18      | 1       |     |        | WGS,RefSeq                      | Klebsiella pneumoniae            | 1554   | 0           | MGH158                         | genomic DNA |         |                                                                                          | 5126454   | 5128007  | FALSE   | ncbi_filtered | 573     |
| AM933754_1_1532                | 580     | AM933754        | Kluyvera cryocrescens partial 16S rRNA gene, isolate 169                             | 29-Jun-08     | 4-Jan-18      | 1       |     |        |                                 | Kluyvera cryocrescens            | 1532   | 0           |                                | genomic DNA |         | 169 clinical sample                                                                      | 1         | 1532     | FALSE   | ncbi_filtered | 580     |
| AM933757_1_1500                | 580     | AM933757        | Kluyvera cryocrescens partial 16S rRNA gene, isolate 4701                            | 29-Jun-08     | 4-Jan-18      | 1       |     |        |                                 | Kluyvera cryocrescens            | 1500   | 0           |                                | genomic DNA |         | 4701 clinical sample                                                                     | 1         | 1500     | FALSE   | ncbi_filtered | 580     |
| K018413_1_1497                 | 580     | K018413         | Kluyvera cryocrescens strain NCIM2490 16S ribosomal RNA gene, partial sequence       | 18-Jun-16     | 4-Jan-18      | 1       |     |        |                                 | Kluyvera cryocrescens            | 1497   | 0           | NCIM2490                       | genomic DNA |         |                                                                                          | 1         | 1497     | FALSE   | ncbi_filtered | 580     |
| KV010117_1_1508                | 580     | KV010117        | Kluyvera cryocrescens strain BT_HNGU_14 16S ribosomal RNA gene, partial sequence     | 25-Oct-16     | 4-Jan-18      | 1       |     |        |                                 | Kluyvera cryocrescens            | 1508   | 13          | BT_HNGU_14                     | genomic DNA |         | Wild Bird fecal                                                                          | 1         | 1508     | FALSE   | ncbi_filtered | 580     |
| NR_028803_1_1459               | 580     | NR_028803       | Kluyvera cryocrescens strain 12993 16S ribosomal RNA gene, partial sequence          | 3-Feb-15      | 4-Jan-18      | 1       |     |        | RefSeq                          | Kluyvera cryocrescens            | 1459   | 0           | 12993.ATCC 33435               | rRNA        |         |                                                                                          | 1         | 1459     | TRUE    | ncbi_filtered | 580     |
| JX482502_1_1459                | 582     | JX482502        | Morganella morganii strain C3 16S ribosomal RNA gene, partial sequence               | 9-Mar-14      | 4-Jan-18      | 1       |     |        |                                 | Morganella morganii              | 1459   | 3           | C3                             | genomic DNA |         | animal surgical site infection                                                           | 1         | 1459     | FALSE   | ncbi_filtered | 582     |
| KC683829_1_1466                | 582     | KC683829        | Morganella morganii strain MFS05 16S ribosomal RNA gene, partial sequence            | 11-Mar-13     | 4-Jan-18      | 1       |     |        |                                 | Morganella morganii              | 1466   | 0           | MFS05                          | genomic DNA |         | mangrove soil                                                                            | 1         | 1466     | FALSE   | ncbi_filtered | 582     |
| KP401283_1_1407                | 582     | KP401283        | Morganella morganii strain IHR-BCF2 16S ribosomal RNA gene, partial sequence         | 4-Jul-15      | 4-Jan-18      | 1       |     |        |                                 | Morganella morganii              | 1407   | 0           | IHR-BCF2                       | genomic DNA |         | gut                                                                                      | 1         | 1407     | FALSE   | ncbi_filtered | 582     |
| KU988846_1_1507                | 582     | KU988846        | Morganella morganii strain VITRSJ14 16S ribosomal RNA gene, partial sequence         | 9-Feb-16      | 4-Jan-18      | 1       |     |        |                                 | Morganella morganii              | 1507   | 0           | VITRSJ14                       | genomic DNA |         |                                                                                          | 1         | 1507     | FALSE   | ncbi_filtered | 582     |
| NZ_CP023505_2575140_2576689    | 582     | NZ_CP023505     | Morganella morganii strain FDAARGOS_365, complete genome                             | 1-Oct-17      | 4-Jan-18      | 1       |     |        | RefSeq                          | Morganella morganii              | 1550   | 0           | FDAARGOS_365                   | genomic DNA |         |                                                                                          | 2575140   | 2576689  | FALSE   | ncbi_filtered | 582     |
| DQ123840_1_1522                | 614     | DQ123840        | Serratia liquefaciens 16S ribosomal RNA gene, partial sequence                       | 1-Jan-06      | 4-Jan-18      | 1       |     |        |                                 | Serratia liquefaciens            | 1522   | 0           | JF-1116                        | genomic DNA |         | Stool                                                                                    | 2575140   | 2576689  | FALSE   | ncbi_filtered | 614     |
| HQ335000_1_1451                | 614     | HQ335000        | Serratia liquefaciens strain V3 16S ribosomal RNA gene, partial sequence             | 5-Nov-13      | 4-Jan-18      | 1       |     |        |                                 | Serratia liquefaciens            | 1451   | 0           | V3                             | genomic DNA |         | Callinectes fish ball                                                                    | 1         | 1451     | FALSE   | ncbi_filtered | 614     |
| NC_021741_4081350_4082897      | 1346614 | NC_021741       | Serratia liquefaciens ATCC 27592, complete genome                                    | 8-Apr-17      | 4-Jan-18      | 1       |     |        | RefSeq                          | Serratia liquefaciens ATCC 27592 | 1548   | 0           | ATCC 27592                     | genomic DNA |         |                                                                                          | 4081350   | 4082897  | TRUE    | ncbi_filtered | 614     |
| NZ_CP011303_5102581_5104126    | 614     | NZ_CP011303     | Serratia liquefaciens strain HUMV-21, complete genome                                | 10-Apr-17     | 4-Jan-18      | 1       |     |        |                                 | Serratia liquefaciens            | 1546   | 0           | HUMV-21                        | genomic DNA |         | skin ulcer                                                                               | 5102581   | 5104126  | FALSE   | ncbi_filtered | 614     |
| AU550467_1_1498                | 615     | AU550467        | Serratia marcescens partial 16S rRNA gene                                            | 30-Mar-03     | 4-Jan-18      | 1       |     |        | 16S ribosomal RNA;16S rRNA gene | Serratia marcescens              | 1498   | 0           |                                | genomic DNA |         |                                                                                          | 1         | 1498     | FALSE   | ncbi_filtered | 615     |
| AY514434_1_1424                | 615     | AY514434        | Serratia marcescens strain N2.4 16S ribosomal RNA gene, partial sequence             | 31-Jan-04     | 4-Jan-18      | 1       |     |        |                                 | Serratia marcescens              | 1424   | 0           | N2.4                           | genomic DNA |         |                                                                                          | 1         | 1424     | FALSE   | ncbi_filtered | 615     |
| GD154657_1_1315                | 615     | GD154657        | Serratia marcescens strain MB11 16S ribosomal RNA gene, partial sequence             | 20-Jun-09     | 4-Jan-18      | 1       |     |        |                                 | Serratia marcescens              | 1315   | 1           | MB11                           | genomic DNA |         |                                                                                          | 1         | 1315     | FALSE   | ncbi_filtered | 615     |
| JF681292_1_1471                | 615     | JF681292        | Serratia marcescens strain EU93 16S ribosomal RNA gene, partial sequence             | 9-Apr-12      | 4-Jan-18      | 1       |     |        |                                 | Serratia marcescens              | 1462   | 1           | EU93                           | genomic DNA |         | root                                                                                     | 1         | 1462     | FALSE   | ncbi_filtered | 615     |
| KR822482_1_1471                | 615     | KR822482        | Serratia marcescens strain TWS-2 16S ribosomal RNA gene, partial sequence            | 27-Oct-16     | 4-Jan-18      | 1       |     |        |                                 | Serratia marcescens              | 1471   | 5           | TWS-2                          | genomic DNA |         | gut                                                                                      | 1         | 1471     | FALSE   | ncbi_filtered | 615     |
| AM184231_1_1468                | 621     | AM184231        | Shigella boydii partial 16S rRNA gene, strain WAB1890                                | 30-Jun-06     | 4-Jan-18      | 1       |     |        |                                 | Shigella boydii                  | 1468   | 3           | WAB1890                        | genomic DNA |         | river water                                                                              | 1         | 1468     | FALSE   | ncbi_filtered | 621     |
| AY966959_1_1502                | 621     | AY966959        | Shigella boydii strain 3555-77 16S ribosomal RNA gene, partial sequence              | 5-Jan-05      | 4-Jan-18      | 1       |     |        |                                 | Shigella boydii                  | 1502   | 0           | 3555-77                        | genomic DNA |         |                                                                                          | 1         | 1502     | FALSE   | ncbi_filtered | 621     |
| CP001063_3885569_3887110       | 344609  | CP001063        | Shigella boydii CDC 3083-94, complete genome                                         | 31-Jan-14     | 4-Jan-18      | 1       |     |        |                                 | Shigella boydii CDC 3083-94      | 1542   | 0           | B5512, CDC 3083-94             | genomic DNA |         |                                                                                          | 3885569   | 3887110  | FALSE   | ncbi_filtered | 621     |
| EU554433_1_1475                | 621     | EU554433        | Shigella boydii strain Ag07 16S ribosomal RNA gene, partial sequence                 | 23-Apr-08     | 4-Jan-18      | 1       |     |        |                                 | Shigella boydii                  | 1475   | 0           | Ag07                           | genomic DNA |         | larval gut                                                                               | 1         | 1475     | FALSE   | ncbi_filtered | 621     |
| KY776568_1_1503                | 621     | KY776568        | Shigella boydii strain FC1851_2 16S ribosomal RNA gene, partial sequence             | 26-Nov-17     | 4-Jan-18      | 1       |     |        |                                 | Shigella boydii                  | 1503   | 0           | FC1851_2                       | genomic DNA |         |                                                                                          | 1         | 1503     | FALSE   | ncbi_filtered | 621     |
| CP019680_2941755_2943310       | 624     | CP019680        | Shigella sonnei strain 75/02, complete genome                                        | 19-May-17     | 4-Jan-18      | 1       |     |        |                                 | Shigella sonnei                  | 1556   | 0           | 75/02                          | genomic DNA |         |                                                                                          |           |          |         |               |         |

| seqname                       | tax_id  | accession        | description                                                                                                | modified_date | download_date | version | num | source | keywords                      | organism                                 | length | ambig_count | strain       | mol_type    | isolate    | isolation_source                           | seq_start | seq_stop | is_type | collection    | species |
|-------------------------------|---------|------------------|------------------------------------------------------------------------------------------------------------|---------------|---------------|---------|-----|--------|-------------------------------|------------------------------------------|--------|-------------|--------------|-------------|------------|--------------------------------------------|-----------|----------|---------|---------------|---------|
| MF445125_1_1443               | 648     | MF445125         | Aeromonas caviae strain J1 16S ribosomal RNA gene, partial sequence                                        | 13-Jul-17     | 4-Jan-18      | 1       |     |        |                               | Aeromonas caviae (Aeromonas punctata)    | 1443   | 0           | J1           | genomic DNA |            | perch branchia                             | 1         | 1443     | FALSE   | ncbi_filtered | 648     |
| MF629673_1_1446               | 648     | MF629673         | Aeromonas caviae strain p5 16S ribosomal RNA gene, partial sequence                                        | 15-Aug-17     | 4-Jan-18      | 1       |     |        |                               | Aeromonas caviae (Aeromonas punctata)    | 1446   | 0           | p5           | genomic DNA |            | kidney                                     | 1         | 1446     | FALSE   | ncbi_filtered | 648     |
| JF171302_1_1490               | 650     | JF171302         | Aeromonas jandaei strain p5 16S ribosomal RNA gene, partial sequence                                       | 14-Sep-11     | 4-Jan-18      | 1       |     |        |                               | Aeromonas jandaei                        | 1490   | 0           | HX201006-2   | genomic DNA |            | liver                                      | 1         | 1490     | FALSE   | ncbi_filtered | 650     |
| JX426061_1_1394               | 650     | JX426061         | Aeromonas jandaei strain HX201006-2 16S ribosomal RNA gene, partial sequence                               | 1-Oct-12      | 4-Jan-18      | 1       |     |        |                               | Aeromonas jandaei                        | 1394   | 0           | HME8596      | genomic DNA |            | lake                                       | 1         | 1394     | FALSE   | ncbi_filtered | 650     |
| KX980469_1_1480               | 650     | KX980469         | Aeromonas jandaei strain RPK47 16S ribosomal RNA gene, partial sequence                                    | 15-Jan-17     | 4-Jan-18      | 1       |     |        |                               | Aeromonas jandaei                        | 1480   | 0           | RPK47        | genomic DNA |            |                                            | 1         | 1480     | FALSE   | ncbi_filtered | 650     |
| MF952526_1_1454               | 650     | MF952526         | Aeromonas jandaei strain BM7 16S ribosomal RNA gene, complete sequence                                     | 31-Oct-17     | 4-Jan-18      | 1       |     |        |                               | Aeromonas jandaei                        | 1454   | 0           | BM7          | genomic DNA |            | lake water                                 | 1         | 1454     | FALSE   | ncbi_filtered | 650     |
| NZ_JWUR0100052_1_1555         | 650     | NZ_JWUR0100052   | Aeromonas jandaei strain L14h Contig_52, whole genome shotgun sequence                                     | 10-Apr-17     | 4-Jan-18      | 1       |     |        | WGS,RefSeq                    | Aeromonas jandaei                        | 1555   | 0           | L14h         | genomic DNA |            | lake water                                 | 1         | 1555     | FALSE   | ncbi_filtered | 650     |
| JF313400_1_1418               | 114517  | JF313400         | Aeromonas veronii bv. sobria strain Fars89A12 16S ribosomal RNA gene, partial sequence                     | 5-Jan-16      | 4-Jan-18      | 1       |     |        |                               | Aeromonas veronii bv. sobria             | 1418   | 11          | Fars89A12    | genomic DNA |            | kidney of diseased fish                    | 1         | 1418     | FALSE   | ncbi_filtered | 654     |
| KC210787_1_1391               | 654     | KC210787         | Aeromonas veronii strain TY3 16S ribosomal RNA gene, partial sequence                                      | 25-Feb-13     | 4-Jan-18      | 1       |     |        |                               | Aeromonas veronii (Aeromonas ichthosmia) | 1391   | 0           | TY3          | genomic DNA |            |                                            | 1         | 1391     | FALSE   | ncbi_filtered | 654     |
| KF413417_1_1449               | 654     | KF413417         | Aeromonas veronii strain HL-7 16S ribosomal RNA gene, partial sequence                                     | 8-Sep-13      | 4-Jan-18      | 1       |     |        |                               | Aeromonas veronii (Aeromonas ichthosmia) | 1449   | 0           | HL-7         | genomic DNA |            | blood                                      | 1         | 1449     | FALSE   | ncbi_filtered | 654     |
| KR094120_1_1506               | 654     | KR094120         | Aeromonas veronii strain JYG1 16S ribosomal RNA gene, partial sequence                                     | 17-May-15     | 4-Jan-18      | 1       |     |        |                               | Aeromonas veronii (Aeromonas ichthosmia) | 1506   | 0           | JYG1         | genomic DNA |            |                                            | 1         | 1506     | FALSE   | ncbi_filtered | 654     |
| MF716700_1_1435               | 654     | MF716700         | Aeromonas veronii strain DC2-2-1 16S ribosomal RNA gene, partial sequence                                  | 28-Aug-17     | 4-Jan-18      | 1       |     |        |                               | Aeromonas veronii (Aeromonas ichthosmia) | 1435   | 0           | DC2-2-1      | genomic DNA |            | Grass carp culture pond                    | 1         | 1435     | FALSE   | ncbi_filtered | 654     |
| AB681359_1_1470               | 659     | AB681359         | Photobacterium phosphoreum gene for 16S rRNA, partial sequence, strain NBRC 101059                         | 28-Jan-12     | 4-Jan-18      | 1       |     |        |                               | Photobacterium phosphoreum               | 1470   | 0           | NBRC 101059  | genomic DNA |            |                                            | 1         | 1470     | FALSE   | ncbi_filtered | 659     |
| AB682147_1_1470               | 659     | AB682147         | Photobacterium phosphoreum gene for 16S rRNA, partial sequence, strain NBRC 104104                         | 28-Jan-12     | 4-Jan-18      | 1       |     |        |                               | Photobacterium phosphoreum               | 1470   | 11          | NBRC 104104  | genomic DNA |            |                                            | 1         | 1470     | FALSE   | ncbi_filtered | 659     |
| AV849399_1_1467               | 659     | AV849399         | Photobacterium phosphoreum strain FS-1.1 16S ribosomal RNA gene, partial sequence                          | 24-Jun-09     | 4-Jan-18      | 1       |     |        |                               | Photobacterium phosphoreum               | 1467   | 6           | FS-1.1       | genomic DNA |            | milkfish skin                              | 1         | 1467     | FALSE   | ncbi_filtered | 659     |
| JM665072_1_1555               | 659     | JM665072         | Photobacterium phosphoreum strain PB-CS-01 16S ribosomal RNA gene, partial sequence                        | 13-Sep-12     | 4-Jan-18      | 1       |     |        |                               | Photobacterium phosphoreum               | 1555   | 0           | PB-CS-01     | genomic DNA |            | commercial pork contaminated by sea food   | 1         | 1555     | FALSE   | ncbi_filtered | 659     |
| Z19107_1_1460                 | 659     | Z19107           | Photobacterium phosphoreum 16S rRNA gene                                                                   | 31-Aug-01     | 4-Jan-18      | 1       |     |        | 16S ribosomal RNA             | Photobacterium phosphoreum               | 1460   | 0           |              | genomic DNA | Og61       |                                            | 1         | 1460     | FALSE   | ncbi_filtered | 659     |
| EU185340_1_1376               | 726     | EU185340         | Haemophilus haemolyticus strain 1216 16S ribosomal RNA gene, partial sequence                              | 9-Oct-07      | 4-Jan-18      | 1       |     |        |                               | Haemophilus haemolyticus                 | 1376   | 0           | 1216         | genomic DNA |            |                                            | 1         | 1376     | FALSE   | ncbi_filtered | 726     |
| EU185365_1_1376               | 726     | EU185365         | Haemophilus haemolyticus strain 24P12H3 16S ribosomal RNA gene, partial sequence                           | 9-Oct-07      | 4-Jan-18      | 1       |     |        |                               | Haemophilus haemolyticus                 | 1376   | 0           | 24P12H3      | genomic DNA |            |                                            | 1         | 1376     | FALSE   | ncbi_filtered | 726     |
| JN227784_1_1462               | 726     | JN227784         | Haemophilus haemolyticus strain M19385 16S ribosomal RNA gene, partial sequence                            | 1-Jan-12      | 4-Jan-18      | 1       |     |        |                               | Haemophilus haemolyticus                 | 1462   | 0           | M19385       | genomic DNA |            |                                            | 1         | 1462     | FALSE   | ncbi_filtered | 726     |
| NR_104930_1_1486              | 726     | NR_104930        | Haemophilus haemolyticus strain CP 103290 16S ribosomal RNA, partial sequence                              | 24-Oct-17     | 4-Jan-18      | 1       |     |        | RefSeq                        | Haemophilus haemolyticus                 | 1486   | 0           | CP 103290    | rRNA        |            | sputum, chest infection                    | 1         | 1486     | TRUE    | ncbi_filtered | 726     |
| EU185468_1_1421               | 727     | EU185468         | Haemophilus influenzae strain C1359 16S ribosomal RNA gene, partial sequence                               | 9-Oct-07      | 4-Jan-18      | 1       |     |        |                               | Haemophilus influenzae                   | 1421   | 0           | C1359        | genomic DNA |            |                                            | 1         | 1421     | FALSE   | ncbi_filtered | 727     |
| EU185479_1_1409               | 727     | EU185479         | Haemophilus influenzae strain H20 16S ribosomal RNA gene, partial sequence                                 | 9-Oct-07      | 4-Jan-18      | 1       |     |        |                               | Haemophilus influenzae                   | 1409   | 0           | H20          | genomic DNA |            |                                            | 1         | 1409     | FALSE   | ncbi_filtered | 727     |
| JN227834_1_1462               | 727     | JN227834         | Haemophilus influenzae strain M19388 16S ribosomal RNA gene, partial sequence                              | 1-Jan-12      | 4-Jan-18      | 1       |     |        |                               | Haemophilus influenzae                   | 1462   | 5           | M19388       | genomic DNA |            |                                            | 1         | 1462     | FALSE   | ncbi_filtered | 727     |
| NZ_ABBW01000015_28814_30361   | 521004  | NZ_ABBW01000015  | Haemophilus influenzae 6P18H1 ctg36, whole genome shotgun sequence                                         | 22-Mar-17     | 4-Jan-18      | 1       |     |        | WGS,RefSeq                    | Haemophilus influenzae 6P18H1            | 1548   | 0           | 6P18H1       | genomic DNA |            |                                            | 28814     | 30361    | FALSE   | ncbi_filtered | 727     |
| NZ_NEAH01000081_89_1632       | 727     | NZ_NEAH01000081  | Haemophilus influenzae strain 19P68H7                                                                      | 14-Mar-18     | 19-Mar-18     | 1       |     |        | WGS,RefSeq                    | Haemophilus influenzae                   | 1544   | 0           | 19P68H7      | genomic DNA |            | sputum                                     | 89        | 1632     | FALSE   | ncbi_filtered | 727     |
| FJ939584_1_1362               | 729     | FJ939584         | Haemophilus parainfluenzae strain PN100 16S ribosomal RNA (rnl) gene, partial sequence                     | 3-Aug-09      | 4-Jan-18      | 1       |     |        |                               | Haemophilus parainfluenzae               | 1362   | 1           | PN100        | genomic DNA |            |                                            | 1         | 1362     | FALSE   | ncbi_filtered | 729     |
| GU561422_1_1420               | 729     | GU561422         | Haemophilus parainfluenzae strain GRG10 16S ribosomal RNA gene, partial sequence                           | 13-Mar-10     | 4-Jan-18      | 1       |     |        |                               | Haemophilus parainfluenzae               | 1420   | 0           | GRG10        | genomic DNA |            | oral cavity                                | 1         | 1420     | FALSE   | ncbi_filtered | 729     |
| NZ_AFSQ01000002_151920_153465 | 888828  | NZ_AFSQ01000002  | Haemophilus parainfluenzae ATCC 33392 ctg1129647027310, whole genome shotgun sequence                      | 2-Apr-17      | 4-Jan-18      | 1       |     |        | WGS,RefSeq                    | Haemophilus parainfluenzae ATCC 33392    | 1546   | 0           | ATCC 33392   | genomic DNA |            | skin, finger                               | 151920    | 153465   | TRUE    | ncbi_filtered | 729     |
| NZ_L2MX01000023_159_1704      | 729     | NZ_L2MX01000023  | Haemophilus parainfluenzae strain CCUG 62654 contig_3, whole genome shotgun sequence                       | 5-Apr-17      | 4-Jan-18      | 1       |     |        | WGS,RefSeq                    | Haemophilus parainfluenzae               | 1546   | 0           | CCUG 62654   | genomic DNA |            | Urethra                                    | 159       | 1704     | FALSE   | ncbi_filtered | 729     |
| NZ_MPJ01000004_1_1316         | 729     | NZ_MPJ01000004   | Haemophilus parainfluenzae strain 60884 B Hc-2 Contig_12, whole genome shotgun sequence                    | 6-Apr-17      | 4-Jan-18      | 1       |     |        | WGS,RefSeq                    | Haemophilus parainfluenzae               | 1316   | 0           | 60884 B Hc-2 | genomic DNA |            |                                            | 1         | 1316     | FALSE   | ncbi_filtered | 729     |
| AY365453_1_1290               | 732     | AY365453         | Haemophilus aphrophilus strain 6757 16S ribosomal RNA gene, partial sequence                               | 10-Feb-04     | 4-Jan-18      | 1       |     |        |                               | Aggregatibacter aphrophilus              | 1290   | 0           | 6757         | genomic DNA |            |                                            | 1         | 1290     | FALSE   | ncbi_filtered | 732     |
| GU470905_1_1515               | 732     | GU470905         | Aggregatibacter aphrophilus strain F0387 16S ribosomal RNA gene, partial sequence                          | 20-Sep-10     | 4-Jan-18      | 1       |     |        |                               | Aggregatibacter aphrophilus              | 1515   | 0           | F0387        | genomic DNA |            | oral microbiome                            | 1         | 1515     | FALSE   | ncbi_filtered | 732     |
| NBTN0200001_1454691_1456234   | 732     | NBTN0200001      | Aggregatibacter aphrophilus strain FDAARGOS_248 scf71800000010_quiver_pilon, whole genome shotgun sequence | 19-Jan-18     | 22-Jan-18     | 1       |     |        | WGS                           | Aggregatibacter aphrophilus              | 1544   | 0           | FDAARGOS_248 | genomic DNA |            | Abscess                                    | 1454691   | 1456234  | FALSE   | ncbi_filtered | 732     |
| NZ_CP012067_1420239_1421782   | 732     | NZ_CP012067      | Aggregatibacter aphrophilus strain W10433, complete genome                                                 | 3-Apr-17      | 4-Jan-18      | 1       |     |        | RefSeq                        | Aggregatibacter aphrophilus              | 1544   | 0           | W10433       | genomic DNA |            | curette                                    | 1420239   | 1421782  | FALSE   | ncbi_filtered | 732     |
| NZ_MAEQ01000009_1_1459        | 732     | NZ_MAEQ01000009  | Aggregatibacter aphrophilus strain ATCC 7901 Contig_17, whole genome shotgun sequence                      | 24-Jul-17     | 4-Jan-18      | 1       |     |        | WGS,RefSeq                    | Aggregatibacter aphrophilus              | 1459   | 0           | ATCC 7901    | genomic DNA |            | Spinal fluid                               | 1         | 1459     | FALSE   | ncbi_filtered | 732     |
| GU561424_1_1419               | 735     | GU561424         | Haemophilus parahaemolyticus strain TTE8 16S ribosomal RNA gene, partial sequence                          | 13-Mar-10     | 4-Jan-18      | 1       |     |        |                               | Haemophilus parahaemolyticus             | 1419   | 0           | TTE8         | genomic DNA |            | oral cavity                                | 1         | 1419     | FALSE   | ncbi_filtered | 735     |
| JF506634_1_1362               | 735     | JF506634         | Haemophilus parahaemolyticus strain CCUG 36104 16S ribosomal RNA gene, partial sequence                    | 27-Mar-12     | 4-Jan-18      | 1       |     |        |                               | Haemophilus parahaemolyticus             | 1362   | 1           | CCUG 36104   | genomic DNA |            |                                            | 1         | 1362     | FALSE   | ncbi_filtered | 735     |
| JF506636_1_1362               | 735     | JF506636         | Haemophilus parahaemolyticus strain HK 48 16S ribosomal RNA gene, partial sequence                         | 27-Mar-12     | 4-Jan-18      | 1       |     |        |                               | Haemophilus parahaemolyticus             | 1362   | 1           | HK 48        | genomic DNA |            |                                            | 1         | 1362     | FALSE   | ncbi_filtered | 735     |
| JF506638_1_1362               | 735     | JF506638         | Haemophilus parahaemolyticus strain HK 1211 16S ribosomal RNA gene, partial sequence                       | 27-Mar-12     | 4-Jan-18      | 1       |     |        |                               | Haemophilus parahaemolyticus             | 1362   | 0           | HK 1211      | genomic DNA |            |                                            | 1         | 1362     | FALSE   | ncbi_filtered | 735     |
| NZ_AJSU010000047_41_1584      | 1095744 | NZ_AJSU010000047 | Haemophilus parahaemolyticus HK385 contig00047, whole genome shotgun sequence                              | 22-Nov-17     | 4-Jan-18      | 1       |     |        | WGS,HIGH_QUALITY_DRAFT,RefSeq | Haemophilus parahaemolyticus HK385       | 1544   | 0           | HK385        | genomic DNA |            | biological product [ENVO:02000043]         | 41        | 1584     | FALSE   | ncbi_filtered | 735     |
| NZ_AJMU010000030_188_1731     | 1095743 | NZ_AJMU010000030 | Haemophilus paraprohaemolyticus HK411 contig00058, whole genome shotgun sequence                           | 23-Nov-17     | 4-Jan-18      | 1       |     |        | WGS,HIGH_QUALITY_DRAFT,RefSeq | Haemophilus paraprohaemolyticus HK411    | 1544   | 0           | HK411        | genomic DNA |            | biological product [ENVO:02000043]         | 188       | 1731     | FALSE   | ncbi_filtered | 736     |
| AF300472_1_1461               | 739     | AF300472         | Aggregatibacter segnis 16S ribosomal RNA gene, partial sequence                                            | 2-Oct-00      | 4-Jan-18      | 1       |     |        |                               | Aggregatibacter segnis                   | 1461   | 0           |              | genomic DNA | VA24579_00 |                                            | 1         | 1461     | FALSE   | ncbi_filtered | 739     |
| AY365447_1_1349               | 739     | AY365447         | Aggregatibacter segnis strain 11G275 16S ribosomal RNA gene, partial sequence                              | 10-Feb-04     | 4-Jan-18      | 1       |     |        |                               | Aggregatibacter segnis                   | 1349   | 0           | 11G275       | genomic DNA |            |                                            | 1         | 1349     | FALSE   | ncbi_filtered | 739     |
| JN711257_1_1531               | 739     | JN711257         | Aggregatibacter segnis canine oral taxon 093 clone Oe003 16S ribosomal RNA gene, partial sequence          | 9-May-12      | 4-Jan-18      | 1       |     |        | ENV                           | Aggregatibacter segnis                   | 1531   | 0           |              | genomic DNA |            | oral cavity subgingival plaque             | 1         | 1531     | FALSE   | ncbi_filtered | 739     |
| NZ_GL62202_65_1613            | 888057  | NZ_GL62202       | Aggregatibacter segnis ATCC 33393 SCFFOLD3, whole genome shotgun sequence                                  | 7-Apr-17      | 4-Jan-18      | 1       |     |        | WGS,STANDARD_DRAFT,RefSeq     | Aggregatibacter segnis ATCC 33393        | 1549   | 0           | ATCC 33393   | genomic DNA |            | oral cavity                                | 65        | 1613     | TRUE    | ncbi_filtered | 739     |
| NZ_JUNA01000027_244_1792      | 739     | NZ_JUNA01000027  | Aggregatibacter segnis strain 933_AAPH 134_1851_398070_98_124, whole genome shotgun sequence               | 10-Apr-17     | 4-Jan-18      | 1       |     |        | WGS,RefSeq                    | Aggregatibacter segnis                   | 1549   | 0           | 933_AAPH     | genomic DNA |            |                                            | 244       | 1792     | FALSE   | ncbi_filtered | 739     |
| NC_017058_58826_560035        | 1105110 | NC_017058        | Rickettsia australis str. Cutlack, complete genome                                                         | 7-Sep-17      | 4-Jan-18      | 1       |     |        | RefSeq                        | Rickettsia australis str. Cutlack        | 1550   | 0           | Cutlack      | genomic DNA |            |                                            | 58826     | 560035   | FALSE   | ncbi_filtered | 787     |
| U12459_1_1455                 | 1196662 | U12459           | Rickettsia australis Phillips 16S rRNA gene, partial sequence                                              | 9-Sep-96      | 4-Jan-18      | 1       |     |        |                               | Rickettsia australis str. Phillips       | 1455   | 2           | Phillips     | genomic DNA |            |                                            | 1         | 1455     | FALSE   | ncbi_filtered | 787     |
| U17644_1_1491                 | 787     | U17644           | Rickettsia australis 16S ribosomal RNA gene, partial sequence                                              | 4-Feb-95      | 4-Jan-18      | 1       |     |        |                               | Rickettsia australis                     | 1491   | 0           | PHS          | rRNA        |            |                                            | 1         | 1491     | FALSE   | ncbi_filtered | 787     |
| CP016418_878896_880452        | 813     | CP016418         | Chlamydia trachomatis strain SB002739 sequence                                                             | 16-Sep-16     | 4-Jan-18      | 1       |     |        |                               | Chlamydia trachomatis                    | 1557   | 0           | SB002739     | genomic DNA |            | Right conjunctiva of a child with trachoma | 878896    | 880452   | FALSE   | ncbi_filtered | 813     |
| DB5722_1_1548                 | 813     | DB5722           | Chlamy                                                                                                     |               |               |         |     |        |                               |                                          |        |             |              |             |            |                                            |           |          |         |               |         |

| seqname                       | tax_id  | accession       | description                                                                                                                | modified_date | download_date | version | num_source | keywords                                                                | organism                                   | length | ambig_count | strain          | mol_type    | isolate                                | isolation_source                   | seq_start | seq_stop | is_type | collection    | species |
|-------------------------------|---------|-----------------|----------------------------------------------------------------------------------------------------------------------------|---------------|---------------|---------|------------|-------------------------------------------------------------------------|--------------------------------------------|--------|-------------|-----------------|-------------|----------------------------------------|------------------------------------|-----------|----------|---------|---------------|---------|
| NZ_CP013020_329933_3931472    | 821     | NZ_CP013020     | Bacteroides vulgatus strain mpk genome                                                                                     | 18-Apr-17     | 4-Jan-18      | 1       |            | Bacteroides vulgatus RefSeq                                             | Bacteroides vulgatus                       | 1540   | 0           | mpk             | genomic DNA |                                        | healthy mouse fecal sample         | 3929393   | 9331472  | FALSE   | ncbi_filtered | 821     |
| AB238923_1_1486               | 823     | AB238923        | Parabacteroides distasonis gene for 16S ribosomal RNA, partial sequence, strain: JCM 13400                                 | 9-Nov-12      | 4-Jan-18      | 1       |            | Parabacteroides distasonis RefSeq                                       | Parabacteroides distasonis                 | 1486   | 0           | JCM 13400       | genomic DNA | Jun-72                                 |                                    | 1         | 1486     | FALSE   | ncbi_filtered | 823     |
| NC_009615_3411862_3413403     | 435591  | NC_009615       | Parabacteroides distasonis ATCC 8503, complete genome                                                                      | 19-May-17     | 4-Jan-18      | 1       |            | Parabacteroides distasonis ATCC 8503 RefSeq                             | Parabacteroides distasonis ATCC 8503       | 1542   | 0           | ATCC 8503       | genomic DNA |                                        |                                    | 3411862   | 3413403  | TRUE    | ncbi_filtered | 823     |
| NZ_CDRH01001198_170_1709      | 823     | NZ_CDRH01001198 | Parabacteroides distasonis strain 2b7a, whole genome shotgun sequence                                                      | 12-Jun-17     | 4-Jan-18      | 1       |            | Parabacteroides distasonis WGS,RefSeq                                   | Parabacteroides distasonis                 | 1540   | 0           | 2b7a            | genomic DNA |                                        |                                    | 170       | 1709     | FALSE   | ncbi_filtered | 823     |
| NZ_H976495_2719934_2721473    | 999416  | NZ_H976495      | Parabacteroides distasonis CLO3T12C09 supercont1.1, whole genome shotgun sequence                                          | 12-Jun-17     | 4-Jan-18      | 1       |            | Parabacteroides distasonis CLO3T12C09 WGS,HIGH_QUALITY_DRAFT,RefSeq     | Parabacteroides distasonis CLO3T12C09      | 1540   | 0           | CLO3T12C09      | genomic DNA |                                        | biological product [ENVO:02000043] | 2719934   | 2721473  | FALSE   | ncbi_filtered | 823     |
| NZ_NJFXJ0000046_3479_5018     | 823     | NZ_NJFXJ0000046 | Parabacteroides distasonis strain An199 whole genome shotgun sequence                                                      | 12-Jun-17     | 4-Jan-18      | 1       |            | Parabacteroides distasonis WGS,RefSeq                                   | Parabacteroides distasonis                 | 1540   | 0           | An199           | genomic DNA |                                        | caecum                             | 3479      | 5018     | FALSE   | ncbi_filtered | 823     |
| GI017667_1_1380               | 827     | GI017667        | An199_contig_46, whole genome shotgun sequence                                                                             | 30-May-12     |               |         |            |                                                                         | Campylobacter ureolyticus                  | 1380   | 0           | UNSWE           | genomic DNA |                                        |                                    | 1         | 1380     | FALSE   | ncbi_filtered | 827     |
| GI017669_1_1396               | 827     | GI017669        | Bacteroides ureolyticus strain UNSWV 16S ribosomal RNA gene, partial sequence                                              | 30-May-12     | 4-Jan-18      | 1       |            | Campylobacter ureolyticus RefSeq                                        | Campylobacter ureolyticus                  | 1396   | 0           | UNSWV           | genomic DNA |                                        |                                    | 1         | 1396     | FALSE   | ncbi_filtered | 827     |
| NR_117766_1_1312              | 112102  | NR_117766       | Bacteroides ureolyticus strain DSM 20703 16S ribosomal RNA gene, partial sequence                                          | 3-Feb-15      | 4-Jan-18      | 1       |            | Campylobacter ureolyticus DSM 20703 RefSeq                              | Campylobacter ureolyticus DSM 20703        | 1312   | 0           | DSM 20703       | rRNA        |                                        |                                    | 1         | 1312     | TRUE    | ncbi_filtered | 827     |
| NZ_CP012195_1536087_1537603   | 1032069 | NZ_CP012195     | Campylobacter ureolyticus RIGS 9880, complete genome                                                                       | 10-Aug-17     | 4-Jan-18      | 1       |            | Campylobacter ureolyticus RIGS 9880 RefSeq                              | Campylobacter ureolyticus RIGS 9880        | 1517   | 0           | RIGS 9880       | genomic DNA |                                        |                                    | 1536087   | 1537603  | FALSE   | ncbi_filtered | 827     |
| NZ_KE340326_680_2196          | 883165  | NZ_KE340326     | Campylobacter ureolyticus ACS-301-V-Sch3b acmBc-supercont1.1, whole genome shotgun sequence                                | 8-Apr-17      | 4-Jan-18      | 1       |            | Campylobacter ureolyticus ACS-301-V-Sch3b WGS,HIGH_QUALITY_DRAFT,RefSeq | Campylobacter ureolyticus ACS-301-V-Sch3b  | 1517   | 0           | ACS-301-V-Sch3b | genomic DNA |                                        |                                    | 680       | 2196     | FALSE   | ncbi_filtered | 827     |
| AF125217_1_1470               | 831     | AF125217        | Butyrivibrio fibrisolvens 16S ribosomal RNA gene, partial sequence                                                         | 30-May-01     | 4-Jan-18      | 1       |            | Butyrivibrio fibrisolvens RefSeq                                        | Butyrivibrio fibrisolvens                  | 1470   | 0           | 8B35            | genomic DNA |                                        |                                    | 1         | 1470     | FALSE   | ncbi_filtered | 831     |
| AY347530_1_1494               | 831     | AY347530        | Butyrivibrio fibrisolvens strain Q/10 16S ribosomal RNA gene, partial sequence                                             | 19-Aug-03     | 4-Jan-18      | 1       |            | Butyrivibrio fibrisolvens RefSeq                                        | Butyrivibrio fibrisolvens                  | 1494   | 5           | Q/10            | genomic DNA |                                        |                                    | 1         | 1494     | FALSE   | ncbi_filtered | 831     |
| KF156791_1_1489               | 831     | KF156791        | Butyrivibrio fibrisolvens strain AR14 16S ribosomal RNA gene, partial sequence                                             | 27-Jun-14     | 4-Jan-18      | 1       |            | Butyrivibrio fibrisolvens RefSeq                                        | Butyrivibrio fibrisolvens                  | 1489   | 0           | AR14            | genomic DNA | rumen                                  |                                    | 1         | 1489     | FALSE   | ncbi_filtered | 831     |
| U41168_1_1533                 | 831     | U41168          | Butyrivibrio fibrisolvens OB156 rRNA gene                                                                                  | 7-Nov-96      | 4-Jan-18      | 1       |            | Butyrivibrio fibrisolvens RefSeq                                        | Butyrivibrio fibrisolvens                  | 1533   | 0           | OB156           | genomic DNA |                                        |                                    | 1         | 1533     | FALSE   | ncbi_filtered | 831     |
| U77339_1_1476                 | 831     | U77339          | Butyrivibrio fibrisolvens strain H10D 16S ribosomal RNA gene, partial sequence                                             | 15-Jan-99     | 4-Jan-18      | 1       |            | Butyrivibrio fibrisolvens RefSeq                                        | Butyrivibrio fibrisolvens                  | 1476   | 0           | H10D            | genomic DNA |                                        |                                    | 1         | 1476     | FALSE   | ncbi_filtered | 831     |
| CP028106_548957_550477        | 469615  | CP028106        | Fusobacterium gonidiformans ATCC 25563 chromosome, complete genome                                                         | 26-Mar-18     | 28-Mar-18     | 1       |            | Fusobacterium gonidiformans ATCC 25563 RefSeq                           | Fusobacterium gonidiformans ATCC 25563     | 1521   | 0           | ATCC 25563      | genomic DNA | Tonsil                                 |                                    | 548957    | 550477   | FALSE   | ncbi_filtered | 849     |
| AF481217_1_1474               | 189726  | AF481217        | Fusobacterium nucleatum E9_12 16S ribosomal RNA gene, partial sequence                                                     | 7-May-09      | 4-Jan-18      | 1       |            | Fusobacterium nucleatum E9_12 RefSeq                                    | Fusobacterium nucleatum E9_12              | 1474   | 0           | E9_12           | genomic DNA | endodontic infection                   |                                    | 1         | 1474     | FALSE   | ncbi_filtered | 851     |
| NPNC01000116_57_1618          | 76859   | NPNC01000116    | Fusobacterium nucleatum subsp. animalis strain P2_LM NODE_116_length_1612_cov_124085_ID_231, whole genome shotgun sequence | 8-Nov-17      | 4-Jan-18      | 1       |            | Fusobacterium nucleatum subsp. animalis WGS                             | Fusobacterium nucleatum subsp. animalis    | 1562   | 0           | P2_LM           | genomic DNA | liver metastasis                       |                                    | 57        | 1618     | FALSE   | ncbi_filtered | 851     |
| NR_113378_1_1480              | 76859   | NR_113378       | Fusobacterium nucleatum subsp. animalis strain JCM 11025 16S ribosomal RNA gene, partial sequence                          | 3-Feb-15      | 4-Jan-18      | 1       |            | Fusobacterium nucleatum subsp. animalis RefSeq                          | Fusobacterium nucleatum subsp. animalis    | 1480   | 0           | JCM 11025       | rRNA        |                                        |                                    | 1         | 1480     | TRUE    | ncbi_filtered | 851     |
| NZ_CP022123_1493675_1495222   | 76857   | NZ_CP022123     | Fusobacterium nucleatum subsp. polymorphum strain KCOM 1275, complete genome                                               | 3-Jul-17      | 4-Jan-18      | 1       |            | Fusobacterium nucleatum subsp. polymorphum RefSeq                       | Fusobacterium nucleatum subsp. polymorphum | 1548   | 0           | KCOM 1275       | genomic DNA | subgingival plaque                     |                                    | 1493675   | 1495222  | FALSE   | ncbi_filtered | 851     |
| NZ_K0518364_22104_23670       | 1316588 | NZ_K0518364     | Fusobacterium nucleatum CT-7, whole genome shotgun sequence                                                                | 2-Apr-17      | 4-Jan-18      | 1       |            | Fusobacterium nucleatum CT-7 WGS,HIGH_QUALITY_DRAFT,RefSeq              | Fusobacterium nucleatum CT-7               | 1567   | 0           | CT-7            | genomic DNA |                                        |                                    | 22104     | 23670    | FALSE   | ncbi_filtered | 851     |
| ACOP02000011_248_1746         | 411483  | ACOP02000011    | Faecalibacterium prausnitzii AT2-165 F prausnitzii-10.1_Con08, whole genome shotgun sequence                               | 3-Sep-09      | 4-Jan-18      | 1       |            | Faecalibacterium prausnitzii AT2-165 WGS                                | Faecalibacterium prausnitzii AT2-165       | 1499   | 0           | A2-165          | genomic DNA |                                        |                                    | 248       | 1746     | FALSE   | ncbi_filtered | 853     |
| HQ457031_1_1308               | 853     | HQ457031        | Faecalibacterium prausnitzii strain HTF1 16S ribosomal RNA gene, partial sequence                                          | 11-Jan-12     | 4-Jan-18      | 1       |            | Faecalibacterium prausnitzii RefSeq                                     | Faecalibacterium prausnitzii               | 1308   | 3           | HTF-1           | genomic DNA | feces                                  |                                    | 1         | 1308     | FALSE   | ncbi_filtered | 853     |
| JM037416_1_1278               | 853     | JM037416        | Faecalibacterium prausnitzii strain L2-39 16S ribosomal RNA gene, partial sequence                                         | 11-Jan-12     | 4-Jan-18      | 1       |            | Faecalibacterium prausnitzii RefSeq                                     | Faecalibacterium prausnitzii               | 1278   | 4           | L2-39           | genomic DNA | feces                                  |                                    | 1         | 1278     | FALSE   | ncbi_filtered | 853     |
| NZ_NMT01000005_3184_4486      | 853     | NZ_NMT01000005  | Faecalibacterium prausnitzii strain CNM1 4541 NODE_19_length_4486_cov_300106_ID_29868, whole genome shotgun sequence       | 17-Oct-17     | 4-Jan-18      | 1       |            | Faecalibacterium prausnitzii WGS,RefSeq                                 | Faecalibacterium prausnitzii               | 1303   | 0           | CNM1 4541       | genomic DNA |                                        |                                    | 3184      | 4486     | FALSE   | ncbi_filtered | 853     |
| NZ_NMT01000017_3683_5201      | 853     | NZ_NMT01000017  | Faecalibacterium prausnitzii strain CNM1 4573 NODE_31_length_5276_cov_244127_ID_29386, whole genome shotgun sequence       | 17-Oct-17     | 4-Jan-18      | 1       |            | Faecalibacterium prausnitzii WGS,RefSeq                                 | Faecalibacterium prausnitzii               | 1519   | 0           | CNM1 4573       | genomic DNA |                                        |                                    | 3683      | 5201     | FALSE   | ncbi_filtered | 853     |
| NR_044689_1_1466              | 855     | NR_044689       | Fusobacterium simiae strain ATCC 33568 16S ribosomal RNA, partial sequence                                                 | 24-Oct-17     | 4-Jan-18      | 2       |            | Fusobacterium simiae RefSeq                                             | Fusobacterium simiae                       | 1466   | 8           | ATCC 33568      | rRNA        |                                        |                                    | 1         | 1466     | TRUE    | ncbi_filtered | 855     |
| NR_113318_1_1466              | 855     | NR_113318       | Fusobacterium simiae strain JCM 17465 16S ribosomal RNA gene, partial sequence                                             | 3-Feb-15      | 4-Jan-18      | 1       |            | Fusobacterium simiae RefSeq                                             | Fusobacterium simiae                       | 1466   | 0           | JCM 17465       | rRNA        |                                        |                                    | 1         | 1466     | TRUE    | ncbi_filtered | 855     |
| CP028103_1277186_1278709      | 469618  | CP028103        | Fusobacterium varium ATCC 27725 chromosome, complete genome                                                                | 26-Mar-18     | 28-Mar-18     | 1       |            | Fusobacterium varium ATCC 27725 RefSeq                                  | Fusobacterium varium ATCC 27725            | 1524   | 0           | ATCC 27725      | genomic DNA | feces                                  |                                    | 1277186   | 1278709  | FALSE   | ncbi_filtered | 856     |
| LT584100_1_1372               | 856     | LT584100        | Fusobacterium varium partial 16S rRNA gene, strain CCLG 4858                                                               | 14-Jul-16     | 4-Jan-18      | 1       |            | Fusobacterium varium RefSeq                                             | Fusobacterium varium                       | 1372   | 0           | CCLG 4858       | genomic DNA | Human feces,purulent infections of man |                                    | 1         | 1372     | TRUE    | ncbi_filtered | 856     |
| NZ_APO17968_1617705_1619228   | 856     | NZ_APO17968     | Fusobacterium varium DNA, complete genome                                                                                  | 27-Sep-17     | 4-Jan-18      | 1       |            | Fusobacterium varium RefSeq                                             | Fusobacterium varium                       | 1524   | 0           | P1137-g1        | genomic DNA |                                        |                                    | 1617705   | 1619228  | FALSE   | ncbi_filtered | 856     |
| NZ_APO17968_216975_217598     | 856     | NZ_APO17968     | Fusobacterium varium DNA, complete genome                                                                                  | 27-Sep-17     | 4-Jan-18      | 1       |            | Fusobacterium varium RefSeq                                             | Fusobacterium varium                       | 1524   | 0           | P1137-g1        | genomic DNA |                                        |                                    | 216975    | 217598   | FALSE   | ncbi_filtered | 856     |
| NZ_CP024699_868820_870361     | 860     | NZ_CP024699     | Fusobacterium periodonticum strain KCOM 1261, complete genome                                                              | 15-Nov-17     | 4-Jan-18      | 1       |            | Fusobacterium periodonticum RefSeq                                      | Fusobacterium periodonticum                | 1542   | 0           | KCOM 1261       | genomic DNA | Tongue                                 |                                    | 868820    | 870361   | FALSE   | ncbi_filtered | 860     |
| NZ_CP024701_618750_620291     | 860     | NZ_CP024701     | Fusobacterium periodonticum strain KCOM 1277, complete genome                                                              | 15-Nov-17     | 4-Jan-18      | 1       |            | Fusobacterium periodonticum RefSeq                                      | Fusobacterium periodonticum                | 1542   | 0           | KCOM 1277       | genomic DNA | Subgingival dental plaque              |                                    | 618750    | 620291   | FALSE   | ncbi_filtered | 860     |
| NZ_GG702384_118_1665          | 469621  | NZ_GG702384     | Fusobacterium periodonticum 1_1_41FAA supercont1.1, whole genome shotgun sequence                                          | 7-Apr-17      | 4-Jan-18      | 1       |            | Fusobacterium periodonticum 1_1_41FAA WGS,RefSeq                        | Fusobacterium periodonticum 1_1_41FAA      | 1548   | 0           | 1_1_41FAA       | genomic DNA | biological product [ENVO:02000043]     |                                    | 118       | 1665     | FALSE   | ncbi_filtered | 860     |
| NZ_KN173679_30_1576           | 469599  | NZ_KN173679     | Fusobacterium periodonticum 2_1_31 acDB-supercont3.3, whole genome shotgun sequence                                        | 9-Apr-17      | 4-Jan-18      | 1       |            | Fusobacterium periodonticum 2_1_31 WGS,HIGH_QUALITY_DRAFT,RefSeq        | Fusobacterium periodonticum 2_1_31         | 1547   | 0           | 2_1_31          | genomic DNA | biological product [ENVO:02000043]     |                                    | 30        | 1576     | FALSE   | ncbi_filtered | 860     |
| NZ_PEQW01000001_229361_230094 | 860     | NZ_PEQW01000001 | Fusobacterium periodonticum strain KCOM 1265 contig1, whole genome shotgun sequence                                        | 10-Nov-17     | 4-Jan-18      | 1       |            | Fusobacterium periodonticum WGS,RefSeq                                  | Fusobacterium periodonticum                | 1544   | 0           | KCOM 1265       | genomic DNA | Subgingival dental plaque              |                                    | 229361    | 230094   | FALSE   | ncbi_filtered | 860     |
| AY196918_1_1476               | 907     | AY196918        | Megasphaera elsdenii strain N4U-150 16S ribosomal RNA gene, partial sequence                                               | 3-Jul-03      | 4-Jan-18      | 1       |            | Megasphaera elsdenii RefSeq                                             | Megasphaera elsdenii                       | 1476   | 10          | 13-Apr          | genomic DNA |                                        |                                    | 1         | 1476     | FALSE   | ncbi_filtered | 907     |
| CP027569_989823_991387        | 907     | CP027569        | Megasphaera elsdenii strain NCIM8702410 chromosome, complete genome                                                        | 17-Mar-18     | 22-Mar-18     | 1       |            | Megasphaera elsdenii RefSeq                                             | Megasphaera elsdenii                       | 1565   | 0           | NCIM8702410     | genomic DNA |                                        |                                    | 989823    | 991387   | FALSE   | ncbi_filtered | 907     |
| KT006903_1_1475               | 907     | KT006903        | Megasphaera elsdenii strain N4U-150 16S ribosomal RNA gene, partial sequence                                               | 9-Nov-15      | 4-Jan-18      | 1       |            | Megasphaera elsdenii RefSeq                                             | Megasphaera elsdenii                       | 1475   | 0           | N4U-150         | genomic DNA | pig feces                              |                                    | 1         | 1475     | FALSE   | ncbi_filtered | 907     |
| KX130891_1_1243               | 907     | KX130891        | Megasphaera elsdenii strain SA3 16S ribosomal RNA gene, partial sequence                                                   | 1-Jun-16      | 4-Jan-18      | 1       |            | Megasphaera elsdenii RefSeq                                             | Megasphaera elsdenii                       | 1243   | 0           | SA3             | genomic DNA |                                        |                                    | 1         | 1243     | FALSE   | ncbi_filtered | 907     |
| NZ_CP009240_2437550_2439118   | 1458465 | NZ_CP009240     | Megasphaera elsdenii 14-14, complete genome                                                                                | 4-Apr-17      | 4-Jan-18      | 1       |            | Megasphaera elsdenii RefSeq                                             | Megasphaera elsdenii 14-14                 | 1569   | 0           | 14-14           | genomic DNA | healthy swine cecal tissue samples     |                                    | 2437550   | 2439118  | FALSE   | ncbi_filtered | 907     |
| LT23690_1_1483                | 1014    | LT23690         | Weeksella virosa partial 16S rRNA gene, strain Marseille-P708                                                              | 21-Mar-16     | 4-Jan-18      | 1       |            | Weeksella virosa RefSeq                                                 | Weeksella virosa                           | 1483   | 1           | Marseille-P708  | genomic DNA | human gu                               |                                    | 1         | 1483     | FALSE   | ncbi_filtered | 1014    |
| NC_015144_1342933_1344458     | 865938  | NC_015144       | Weeksella virosa DSM 16922, complete genome                                                                                | 7-Apr-17      | 4-Jan-18      | 1       |            | Weeksella virosa DSM 16922 GSC,MIGS-2.1,RefSeq                          | Weeksella virosa DSM 16922                 | 1526   | 0           | DSM 16922       | genomic DNA | urine                                  |                                    | 1342933   | 1344458  | TRUE    | ncbi_filtered | 1014    |
| NC_015144_2060130_2061836     | 865938  | NC_015144       | Weeksella virosa DSM 16922, complete genome                                                                                | 7-Apr-17      | 4-Jan-18      | 1       |            | Weeksella virosa DSM 16922 GSC,MIGS-2.1,RefSeq                          | Weeksella virosa DSM 16922                 | 1527   | 0           | DSM 16922       | genomic DNA | urine                                  |                                    | 2060130   | 2061836  | TRUE    | ncbi_filtered | 1014    |
| NC_015144_378272_379798       | 865938  | NC_015144       | Weeksella virosa DSM 16922, complete genome                                                                                | 7-Apr-17      | 4-Jan-18      | 1       |            | Weeksella virosa DSM 16922 GSC,MIGS-2.1,RefSeq                          | Weeksella virosa DSM 16922                 | 1527   | 0           | DSM 16922       | genomic DNA | urine                                  |                                    | 378272    | 379798   | TRUE    | ncbi_filtered | 1014    |
| NR_113835_1_1445              | 1014    | NR_113835       | Weeksella virosa strain NBRC 16016 16S ribosomal RNA gene, partial sequence                                                | 3-Feb-15      | 4-Jan-18      | 1       |            | Weeksella virosa RefSeq                                                 | Weeksella virosa                           | 1445   | 2           | NBRC 16016      | rRNA        |                                        |                                    | 1         | 1445     | TRUE    | ncbi_filtered | 1014    |
| GU561333_1_1405               | 1017    | GU561333        | Capnocytophaga gingivalis strain Gum10 16S ribosomal RNA gene, partial sequence                                            | 13-Mar-10     | 4-Jan-18      | 1       |            | Capnocytophaga gingivalis RefSeq                                        | Capnocytophaga gingivalis                  | 1405   | 0           | Gum10           | genomic DNA |                                        |                                    |           |          |         |               |         |

| seqname                   | tax_id  | accession       | description                                                                                             | modified_date | download_date | version_num | source                                            | keywords                          | organism                                          | length | ambig_count | strain             | mol_type    | isolate    | isolation_source                                                                                                                                                           | seq_start | seq_stop | is_type | collection    | species |
|---------------------------|---------|-----------------|---------------------------------------------------------------------------------------------------------|---------------|---------------|-------------|---------------------------------------------------|-----------------------------------|---------------------------------------------------|--------|-------------|--------------------|-------------|------------|----------------------------------------------------------------------------------------------------------------------------------------------------------------------------|-----------|----------|---------|---------------|---------|
| NZ_CP016033_196401_197891 | 1112    | NZ_CP016033     | Porphyrobacter neustonensis strain DSM 9434, complete genome                                            | 12-Apr-17     | 4-Jan-18      | 1           | Porphyrobacter neustonensis                       | GSC:MixS;MG3.3.0;RefSeq           | Porphyrobacter neustonensis                       | 1491   | 0           | DSM 9434           | genomic DNA |            | eutrophic freshwater pond                                                                                                                                                  | 196401    | 197891   | TRUE    | ncbi_filtered | 1112    |
| DQ286460_1_1394           | 1258    | DQ286460        | Peptoniphilus ascharyoticus 16S ribosomal RNA gene, partial sequence                                    | 9-Dec-06      | 4-Jan-18      | 1           | Peptoniphilus ascharyoticus                       |                                   | Peptoniphilus ascharyoticus                       | 1394   | 3           | ATCC 29743         | genomic DNA |            |                                                                                                                                                                            | 1         | 1394     | FALSE   | ncbi_filtered | 1258    |
| KP944180_1_1414           | 1258    | KP944180        | Peptoniphilus ascharyoticus strain 1312-10216 16S ribosomal RNA gene, partial sequence                  | 1-Sep-15      | 4-Jan-18      | 1           | Peptoniphilus ascharyoticus                       |                                   | Peptoniphilus ascharyoticus                       | 1414   | 0           | 1312-10216         | genomic DNA |            | puncture fluid                                                                                                                                                             | 1         | 1414     | FALSE   | ncbi_filtered | 1258    |
| KP944181_1_1424           | 1258    | KP944181        | Peptoniphilus ascharyoticus strain W16018C2 16S ribosomal RNA gene, partial sequence                    | 1-Sep-15      | 4-Jan-18      | 1           | Peptoniphilus ascharyoticus                       |                                   | Peptoniphilus ascharyoticus                       | 1424   | 0           | W16018C2           | genomic DNA |            | tissue                                                                                                                                                                     | 1         | 1424     | FALSE   | ncbi_filtered | 1258    |
| AB691574_1_1483           | 1260    | AB691574        | Finegoldia magna gene for 16S ribosomal RNA, partial sequence, strain: JCM 6491                         | 9-Nov-12      | 4-Jan-18      | 1           | Finegoldia magna                                  |                                   | Finegoldia magna                                  | 1483   | 0           | JCM 6491           | genomic DNA |            |                                                                                                                                                                            | 1         | 1483     | FALSE   | ncbi_filtered | 1260    |
| NZ_AFUI0100003_1853_3379  | 866779  | NZ_AFUI0100003  | Finegoldia magna SY403409CC01050417                                                                     | 22-Nov-17     | 4-Jan-18      | 1           | Finegoldia magna SY403409CC01050417               | WGS;RefSeq                        | Finegoldia magna SY403409CC01050417               | 1527   | 0           | SY403409CC01050417 | genomic DNA |            | biological product [ENVO:02000043]                                                                                                                                         | 1853      | 3379     | FALSE   | ncbi_filtered | 1260    |
| NZ_CM000955_1263580       | 525282  | NZ_CM000955     | Finegoldia magna ATCC 53516 chromosome, whole genome shotgun sequence                                   | 30-Mar-17     | 4-Jan-18      | 1           | Finegoldia magna ATCC 53516                       | WGS;NONCONTIGUOUS_FINISHED;RefSeq | Finegoldia magna ATCC 53516                       | 1530   | 0           | ATCC 53516         | genomic DNA |            | biological product [ENVO:02000043]                                                                                                                                         | 263851    | 263880   | FALSE   | ncbi_filtered | 1260    |
| NZ_NDYO1000057_113_1642   | 1260    | NZ_NDYO1000057  | Finegoldia magna strain CCGU 54800 5S, whole genome shotgun sequence                                    | 23-Oct-17     | 4-Jan-18      | 1           | Finegoldia magna                                  | WGS;RefSeq                        | Finegoldia magna                                  | 1530   | 0           | CCGU 54800         | genomic DNA |            | orthopedic joint implant                                                                                                                                                   | 113       | 1642     | FALSE   | ncbi_filtered | 1260    |
| NZ_NDYO1000030_0_1457     | 1260    | NZ_NDYO1000030  | Finegoldia magna strain 127273 30c, whole genome shotgun sequence                                       | 23-Oct-17     | 4-Jan-18      | 1           | Finegoldia magna                                  | WGS;RefSeq                        | Finegoldia magna                                  | 1449   | 0           | 127273             | genomic DNA |            | orthopedic joint implant                                                                                                                                                   | 9         | 1457     | FALSE   | ncbi_filtered | 1260    |
| AB640888_1_1479           | 1261    | AB640888        | Peptostreptococcus anaerobius gene for 16S ribosomal RNA, partial sequence, strain: JCM 1470            | 9-Nov-12      | 4-Jan-18      | 1           | Peptostreptococcus anaerobius                     |                                   | Peptostreptococcus anaerobius                     | 1479   | 0           | JCM 1470           | genomic DNA |            |                                                                                                                                                                            | 1         | 1479     | FALSE   | ncbi_filtered | 1261    |
| NR_118652_1_1462          | 1261    | NR_118652       | Peptostreptococcus anaerobius strain ATCC 27337 16S ribosomal RNA, partial sequence                     | 24-Oct-17     | 4-Jan-18      | 1           | Peptostreptococcus anaerobius                     | RefSeq                            | Peptostreptococcus anaerobius                     | 1462   | 9           | ATCC 27337         | rRNA        |            |                                                                                                                                                                            | 1         | 1462     | TRUE    | ncbi_filtered | 1261    |
| NZ_KX829083_1_1425        | 1035196 | NZ_KX829083     | Peptostreptococcus anaerobius VPI 4330 = DSM 2949 strain VPI 4330 SclF05, whole genome shotgun sequence | 1-Apr-17      | 4-Jan-18      | 1           | Peptostreptococcus anaerobius VPI 4330 = DSM 2949 | WGS;HIGH_QUALITY_DRAFT;RefSeq     | Peptostreptococcus anaerobius VPI 4330 = DSM 2949 | 1425   | 0           | VPI 4330           | genomic DNA |            | oral cavity                                                                                                                                                                | 1         | 1425     | TRUE    | ncbi_filtered | 1261    |
| NZ_KQ026705_1_1424        | 1261    | NZ_KQ026705     | Peptostreptococcus anaerobius strain KA00810 Scaffold62, whole genome shotgun sequence                  | 4-Apr-17      | 4-Jan-18      | 1           | Peptostreptococcus anaerobius                     | WGS;HIGH_QUALITY_DRAFT;RefSeq     | Peptostreptococcus anaerobius                     | 1424   | 0           | KA00810            | genomic DNA |            | vagina                                                                                                                                                                     | 1         | 1424     | FALSE   | ncbi_filtered | 1261    |
| E1196531_1_1400           | 1270    | E1196531        | Micrococcus luteus clone B14 16S ribosomal RNA gene, partial sequence                                   | 30-Oct-07     | 4-Jan-18      | 1           | Micrococcus luteus                                |                                   | Micrococcus luteus                                | 1400   | 0           |                    | genomic DNA |            | manure plot of Jin Shiji organic pear orchard using traditional dull and stereotyped cultivation law from April to October 2006 air collected by Andersen FA-1 air sampler | 1         | 1400     | FALSE   | ncbi_filtered | 1270    |
| HQ323416_1_1487           | 1270    | HQ323416        | Micrococcus luteus strain A4 16S ribosomal RNA gene, partial sequence                                   | 24-Jan-11     | 4-Jan-18      | 1           | Micrococcus luteus                                |                                   | Micrococcus luteus                                | 1487   | 1           | A4                 | genomic DNA |            |                                                                                                                                                                            | 1         | 1487     | FALSE   | ncbi_filtered | 1270    |
| JN878531_1_1499           | 1270    | JN878531        | Micrococcus luteus strain PCSH-2 16S ribosomal RNA gene, partial sequence                               | 24-May-12     | 4-Jan-18      | 1           | Micrococcus luteus                                |                                   | Micrococcus luteus                                | 1499   | 0           | PCSH-2             | genomic DNA |            | sludge                                                                                                                                                                     | 1         | 1499     | FALSE   | ncbi_filtered | 1270    |
| KJ734882_1_1400           | 1270    | KJ734882        | Micrococcus luteus strain ZBGLK13 16S ribosomal RNA gene, partial sequence                              | 10-Jun-14     | 4-Jan-18      | 1           | Micrococcus luteus                                |                                   | Micrococcus luteus                                | 1400   | 0           | ZBGLK13            | genomic DNA |            |                                                                                                                                                                            | 1         | 1400     | FALSE   | ncbi_filtered | 1270    |
| NC_012803_419925_421456   | 465515  | NC_012803       | Micrococcus luteus NCTC 2665, complete genome                                                           | 10-Apr-17     | 4-Jan-18      | 1           | Micrococcus luteus NCTC 2665                      | RefSeq                            | Micrococcus luteus NCTC 2665                      | 1532   | 0           | NCTC 2665          | genomic DNA |            | commercial airline cabin air                                                                                                                                               | 419925    | 421456   | TRUE    | ncbi_filtered | 1270    |
| EU379259_1_1397           | 1273    | EU379259        | Micrococcus luteus strain 1RN-SA 16S ribosomal RNA gene, partial sequence                               | 22-Dec-11     | 4-Jan-18      | 1           | Micrococcus luteus                                |                                   | Micrococcus luteus                                | 1397   | 4           | 1RN-SA             | genomic DNA |            | commercial airline cabin air                                                                                                                                               | 1         | 1397     | FALSE   | ncbi_filtered | 1273    |
| EU379260_1_1396           | 1273    | EU379260        | Micrococcus luteus strain 1RN-SB 16S ribosomal RNA gene, partial sequence                               | 22-Dec-11     | 4-Jan-18      | 1           | Micrococcus luteus                                |                                   | Micrococcus luteus                                | 1396   | 6           | 1RN-SB             | genomic DNA |            | commercial airline cabin air                                                                                                                                               | 1         | 1396     | FALSE   | ncbi_filtered | 1273    |
| EU379262_1_1411           | 1273    | EU379262        | Micrococcus luteus strain 1RN-SD 16S ribosomal RNA gene, partial sequence                               | 22-Dec-11     | 4-Jan-18      | 1           | Micrococcus luteus                                |                                   | Micrococcus luteus                                | 1411   | 7           | 1RN-SD             | genomic DNA |            | commercial airline cabin air                                                                                                                                               | 1         | 1411     | FALSE   | ncbi_filtered | 1273    |
| HM209730_1_1445           | 1273    | HM209730        | Micrococcus luteus strain GCA726 16S ribosomal RNA gene, partial sequence                               | 6-Sep-10      | 4-Jan-18      | 1           | Micrococcus luteus                                |                                   | Micrococcus luteus                                | 1445   | 0           | GCA726             | genomic DNA |            | air at university garden                                                                                                                                                   | 1         | 1445     | FALSE   | ncbi_filtered | 1273    |
| HQ323457_1_1498           | 1273    | HQ323457        | Micrococcus luteus strain S2 16S ribosomal RNA gene, partial sequence                                   | 24-Jan-11     | 4-Jan-18      | 1           | Micrococcus luteus                                |                                   | Micrococcus luteus                                | 1498   | 0           | S2                 | genomic DNA |            | air collected by Andersen FA-1 air sampler                                                                                                                                 | 1         | 1498     | FALSE   | ncbi_filtered | 1273    |
| HE716946_1_1391           | 1274    | HE716946        | Dermaococcus nishinomiyaensis partial 16S rRNA gene, strain JPR-05                                      | 5-Mar-14      | 4-Jan-18      | 1           | Dermaococcus nishinomiyaensis                     |                                   | Dermaococcus nishinomiyaensis                     | 1391   | 0           | JPR-06             | genomic DNA |            |                                                                                                                                                                            | 1         | 1391     | FALSE   | ncbi_filtered | 1274    |
| KR090610_1_1429           | 1274    | KR090610        | Dermaococcus nishinomiyaensis isolate T. 15_0004 16S ribosomal RNA gene, partial sequence               | 2-May-16      | 4-Jan-18      | 1           | Dermaococcus nishinomiyaensis                     |                                   | Dermaococcus nishinomiyaensis                     | 1429   | 0           |                    | genomic DNA | T. 15_0004 | blood                                                                                                                                                                      | 1         | 1429     | FALSE   | ncbi_filtered | 1274    |
| KU922179_1_1371           | 1274    | KU922179        | Dermaococcus nishinomiyaensis strain DS1 16S ribosomal RNA gene, partial sequence                       | 14-Jan-17     | 4-Jan-18      | 1           | Dermaococcus nishinomiyaensis                     |                                   | Dermaococcus nishinomiyaensis                     | 1371   | 0           | DS1                | genomic DNA |            | air                                                                                                                                                                        | 1         | 1371     | FALSE   | ncbi_filtered | 1274    |
| MF467812_1_1206           | 1274    | MF467812        | Dermaococcus nishinomiyaensis strain A-11 16S ribosomal RNA gene, partial sequence                      | 19-Feb-18     | 27-Feb-18     | 1           | Dermaococcus nishinomiyaensis                     |                                   | Dermaococcus nishinomiyaensis                     | 1206   | 0           | A-11               | genomic DNA |            | drill hole (2 m)                                                                                                                                                           | 1         | 1206     | FALSE   | ncbi_filtered | 1274    |
| MF467816_1_1318           | 1274    | MF467816        | Dermaococcus nishinomiyaensis strain A-36 16S ribosomal RNA gene, partial sequence                      | 19-Feb-18     | 27-Feb-18     | 1           | Dermaococcus nishinomiyaensis                     |                                   | Dermaococcus nishinomiyaensis                     | 1318   | 0           | A-36               | genomic DNA |            | muddoil                                                                                                                                                                    | 1         | 1318     | FALSE   | ncbi_filtered | 1274    |
| HG000002_1_1432           | 1275    | HG000002        | Kocuria rosea partial 16S rRNA gene, strain PrD                                                         | 28-Jun-13     | 4-Jan-18      | 1           | Kocuria rosea                                     |                                   | Kocuria rosea                                     | 1432   | 0           | PrD                | genomic DNA |            | host rhizosphere                                                                                                                                                           | 1         | 1432     | FALSE   | ncbi_filtered | 1275    |
| JQ558883_1_1409           | 1275    | JQ558883        | Kocuria rosea strain 19 16S ribosomal RNA gene, partial sequence                                        | 9-Apr-13      | 4-Jan-18      | 1           | Kocuria rosea                                     |                                   | Kocuria rosea                                     | 1409   | 7           | 19                 | genomic DNA |            | host female                                                                                                                                                                | 1         | 1409     | FALSE   | ncbi_filtered | 1275    |
| KJ439573_1_1450           | 1275    | KJ439573        | Kocuria rosea strain ACTM12 16S ribosomal RNA gene, partial sequence                                    | 9-Sep-14      | 4-Jan-18      | 1           | Kocuria rosea                                     |                                   | Kocuria rosea                                     | 1450   | 0           | ACTM12             | genomic DNA |            | soil sample                                                                                                                                                                | 1         | 1450     | FALSE   | ncbi_filtered | 1275    |
| KU147456_1_1410           | 1275    | KU147456        | Kocuria rosea strain DQ223 16S ribosomal RNA gene, partial sequence                                     | 3-May-16      | 4-Jan-18      | 1           | Kocuria rosea                                     |                                   | Kocuria rosea                                     | 1410   | 0           | DQ223              | genomic DNA |            | Xileng Daqu                                                                                                                                                                | 1         | 1410     | FALSE   | ncbi_filtered | 1275    |
| KU922520_1_1406           | 1275    | KU922520        | Kocuria rosea strain SSW13 16S ribosomal RNA gene, partial sequence                                     | 14-Jan-17     | 4-Jan-18      | 1           | Kocuria rosea                                     |                                   | Kocuria rosea                                     | 1406   | 0           | SSW13              | genomic DNA |            | air                                                                                                                                                                        | 1         | 1406     | FALSE   | ncbi_filtered | 1275    |
| KF493200_1_1448           | 1280    | KF493200        | Staphylococcus aureus strain ATCC 41577 16S ribosomal RNA gene, partial sequence                        | 24-Aug-13     | 4-Jan-18      | 1           | Staphylococcus aureus                             |                                   | Staphylococcus aureus                             | 1448   | 1           | ATCC 41577         | genomic DNA |            |                                                                                                                                                                            | 1         | 1448     | FALSE   | ncbi_filtered | 1280    |
| KX373896_1_1291           | 1280    | KX373896        | Staphylococcus aureus strain KV8 16S ribosomal RNA gene, partial sequence                               | 16-Jun-16     | 4-Jan-18      | 1           | Staphylococcus aureus                             |                                   | Staphylococcus aureus                             | 1291   | 0           | KV8                | genomic DNA |            | bronchial-abscess                                                                                                                                                          | 1         | 1291     | FALSE   | ncbi_filtered | 1280    |
| KX638758_1_1310           | 1280    | KX638758        | Staphylococcus aureus strain SQ1 16S ribosomal RNA gene, partial sequence                               | 8-Aug-17      | 4-Jan-18      | 1           | Staphylococcus aureus                             |                                   | Staphylococcus aureus                             | 1310   | 0           | SQ1                | genomic DNA |            | human excrement                                                                                                                                                            | 1         | 1310     | FALSE   | ncbi_filtered | 1280    |
| KX638783_1_1310           | 1280    | KX638783        | Staphylococcus aureus strain DL6 16S ribosomal RNA gene, partial sequence                               | 8-Aug-17      | 4-Jan-18      | 1           | Staphylococcus aureus                             |                                   | Staphylococcus aureus                             | 1310   | 0           | DL6                | genomic DNA |            | human excrement                                                                                                                                                            | 1         | 1310     | FALSE   | ncbi_filtered | 1280    |
| NZ_CUIV01000053_03_1648   | 1280    | NZ_CUIV01000053 | Staphylococcus aureus strain BSAR708, whole genome shotgun sequence                                     | 5-Mar-17      | 4-Jan-18      | 1           | Staphylococcus aureus                             | WGS;RefSeq                        | Staphylococcus aureus                             | 1586   | 0           | BSAR708            | genomic DNA |            | not known                                                                                                                                                                  | 63        | 1648     | FALSE   | ncbi_filtered | 1280    |
| K0057496_1_1475           | 1281    | K0057496        | Staphylococcus carnosus strain a1 16S ribosomal RNA gene, partial sequence                              | 18-Dec-16     | 4-Jan-18      | 1           | Staphylococcus carnosus                           |                                   | Staphylococcus carnosus                           | 1475   | 0           | a1                 | genomic DNA |            | hudy                                                                                                                                                                       | 1         | 1475     | FALSE   | ncbi_filtered | 1281    |
| K0057500_1_1485           | 1281    | K0057500        | Staphylococcus carnosus strain a23 16S ribosomal RNA gene, partial sequence                             | 18-Dec-16     | 4-Jan-18      | 1           | Staphylococcus carnosus                           |                                   | Staphylococcus carnosus                           | 1485   | 0           | a23                | genomic DNA |            | hudy                                                                                                                                                                       | 1         | 1485     | FALSE   | ncbi_filtered | 1281    |
| LC145699_1_1414           | 1281    | LC145699        | Staphylococcus carnosus gene for 16S ribosomal RNA, partial sequence, strain: K21522                    | 2-May-17      | 4-Jan-18      | 1           | Staphylococcus carnosus                           |                                   | Staphylococcus carnosus                           | 1414   | 0           | K21522             | genomic DNA |            | traditional Thai fermented shrimp (kung-som)                                                                                                                               | 1         | 1414     | FALSE   | ncbi_filtered | 1281    |
| MG669294_1_1518           | 1281    | MG669294        | Staphylococcus carnosus strain HSP-S1 16S ribosomal RNA gene, partial sequence                          | 17-Dec-17     | 4-Jan-18      | 1           | Staphylococcus carnosus                           |                                   | Staphylococcus carnosus                           | 1518   | 0           | HSP-S1             | genomic DNA |            | Hunan smoked pork                                                                                                                                                          | 1         | 1518     | FALSE   | ncbi_filtered | 1281    |
| NC_012121_121792_123348   | 396513  | NC_012121       | Staphylococcus carnosus subsp. carnosus TM300 complete genome                                           | 6-Apr-17      | 4-Jan-18      | 1           | Staphylococcus carnosus subsp. carnosus TM300     | RefSeq;complete genome            | Staphylococcus carnosus subsp. carnosus TM300     | 1557   | 0           | TM300              | genomic DNA |            |                                                                                                                                                                            | 121792    | 123348   | FALSE   | ncbi_filtered | 1281    |
| JQ958849_1_1484           | 1282    | JQ958849        | Staphylococcus epidermidis strain 21 16S ribosomal RNA gene, partial sequence                           | 9-Apr-13      | 4-Jan-18      | 1           | Staphylococcus epidermidis                        |                                   | Staphylococcus epidermidis                        | 1484   | 11          | 21                 | genomic DNA |            | host female                                                                                                                                                                | 1         | 1484     | FALSE   | ncbi_filtered | 1282    |
| KC329827_1_1515           | 1282    | KC329827        | Staphylococcus epidermidis strain 14F 16S ribosomal RNA gene, partial sequence                          | 2-Feb-13      | 4-Jan-18      | 1           | Staphylococcus epidermidis                        |                                   | Staphylococcus epidermidis                        | 1515   | 0           | 14F                | genomic DNA |            | tuber                                                                                                                                                                      | 1         | 1515     | FALSE   | ncbi_filtered | 1282    |
| KJ571204_1_1497           | 1282    | KJ571204        | Staphylococcus epidermidis strain K3H17 16S ribosomal RNA gene, partial sequence                        | 4-Apr-15      | 4-Jan-18      | 1           | Staphylococcus epidermidis                        |                                   | Staphylococcus epidermidis                        | 1497   | 0           | K3H17              | genomic DNA |            | Beach sands                                                                                                                                                                | 1         | 1497     | FALSE   | ncbi_filtered | 1282    |
| KP726933_1_1525           | 1282    | KP726933        | Staphylococcus epidermidis strain MKAS 02 16S ribosomal RNA gene, partial sequence                      | 27-Jul-15     | 4-Jan-18      | 1           | Staphylococcus epidermidis                        |                                   | Staphylococcus epidermidis                        | 1525   | 0           | MKAS 02            | genomic DNA |            |                                                                                                                                                                            | 1         | 1525     | FALSE   | ncbi_filtered | 1282    |
| MG937601_1_1424           | 1282    | MG937601        | Staphylococcus epidermidis strain SML_1345 16S ribosomal RNA gene, partial sequence                     | 17-Feb-18     | 4-Jan-18      | 1           | Staphylococcus epidermidis                        |                                   | Staphylococcus epidermidis                        | 1424   | 0           | SML_1345           | genomic DNA |            |                                                                                                                                                                            | 1         | 1424     | FALSE   | ncbi_filtered | 1282    |
| FN393800_1_1367           | 1283    | FN393800        | Staphylococcus haemolyticus partial 16S rRNA gene, strain ES-230-1b                                     | 21-May-09     | 4-Jan-18      | 1           | Staphylococcus haemolyticus                       |                                   | Staphylococcus haemolyticus                       | 1367   | 1           | ES-230-1b          | genomic DNA |            | ESTEC clean room                                                                                                                                                           | 1         | 1367     | FALSE   | ncbi_filtered | 1283    |
| JF343133_1_1443           | 1283    | JF343133        | Staphylococcus haemolyticus strain IARI-CS-32 16S ribosomal RNA gene, partial sequence                  | 24-May-11     | 4-Jan-18      | 1           | Staphylococcus haemolyticus                       |                                   | Staphylococcus haemolyticus                       | 1443   | 0           | IARI-CS-32         | genomic DNA |            | lake sediments                                                                                                                                                             | 1         | 1443     | FALSE   | ncbi_filtered | 1283    |
| KF541100_1_1520           | 1283    | KF541100        | Staphylococcus haemolyticus                                                                             |               |               |             |                                                   |                                   |                                                   |        |             |                    |             |            |                                                                                                                                                                            |           |          |         |               |         |

| seqname                       | tax_id  | accession       | description                                                                                                         | modified_date | download_date | version | num | source                                        | keywords                  | organism                                      | length | ambig_count | strain      | mol_type    | isolate | isolation_source                             | seq_start | seq_stop | is_type | collection    | species |
|-------------------------------|---------|-----------------|---------------------------------------------------------------------------------------------------------------------|---------------|---------------|---------|-----|-----------------------------------------------|---------------------------|-----------------------------------------------|--------|-------------|-------------|-------------|---------|----------------------------------------------|-----------|----------|---------|---------------|---------|
| EU071624_1_1419               | 1290    | EU071624        | Staphylococcus hominis strain EHF52_AU1He 16S ribosomal RNA gene, partial sequence                                  | 22-Aug-07     | 4-Jan-18      | 1       |     | Staphylococcus hominis                        |                           | Staphylococcus hominis                        | 1419   | 4           | EHF52_AU1He | genomic DNA |         | ESTEC HYDRA facility                         | 1         | 1419     | FALSE   | ncbi_filtered | 1290    |
| EUK37114_1_1530               | 1290    | EUK37114        | Staphylococcus hominis strain 388 16S ribosomal RNA gene, partial sequence                                          | 28-Apr-09     | 4-Jan-18      | 1       |     | Staphylococcus hominis                        |                           | Staphylococcus hominis                        | 1530   | 0           | 388         | genomic DNA |         |                                              | 1         | 1530     | FALSE   | ncbi_filtered | 1290    |
| KC300465_1_1500               | 1290    | KC300465        | Staphylococcus hominis strain KO-18 16S ribosomal RNA gene, partial sequence                                        | 18-Feb-13     | 4-Jan-18      | 1       |     | Staphylococcus hominis                        |                           | Staphylococcus hominis                        | 1500   | 0           | KO-18       | genomic DNA |         | tidal pool                                   | 1         | 1500     | FALSE   | ncbi_filtered | 1290    |
| KM817269_1_1520               | 145393  | KM817269        | Staphylococcus hominis subsp. novobiosepticus strain IHB B 16653 16S ribosomal RNA gene, partial sequence           | 3-Feb-16      | 4-Jan-18      | 1       |     | Staphylococcus hominis subsp. novobiosepticus |                           | Staphylococcus hominis subsp. novobiosepticus | 1520   | 0           | IHB B 16653 | genomic DNA |         | Galandarr saffron farm, District Puhama, J&K | 1         | 1520     | FALSE   | ncbi_filtered | 1290    |
| KY436487_1_1328               | 1290    | KY436487        | Staphylococcus hominis 16S ribosomal RNA gene, partial sequence                                                     | 26-Jul-17     | 4-Jan-18      | 1       |     | Staphylococcus hominis                        |                           | Staphylococcus hominis                        | 1328   | 0           | GTC 1228    | genomic DNA |         | mangrove plant                               | 1         | 1328     | FALSE   | ncbi_filtered | 1290    |
| EU867330_1_1393               | 1292    | EU867330        | Staphylococcus warneri strain CGGE2014 16S ribosomal RNA gene, partial sequence                                     | 24-Sep-10     | 4-Jan-18      | 1       |     | Staphylococcus warneri                        |                           | Staphylococcus warneri                        | 1393   | 0           | CGGE2014    | genomic DNA |         |                                              | 1         | 1393     | FALSE   | ncbi_filtered | 1292    |
| GQ205669_1_1434               | 1292    | GQ205669        | Staphylococcus warneri strain FUA 3227 16S ribosomal RNA gene, partial sequence                                     | 13-Mar-13     | 4-Jan-18      | 1       |     | Staphylococcus warneri                        |                           | Staphylococcus warneri                        | 1445   | 5           | FUA 3227    | genomic DNA |         | vagina                                       | 1         | 1445     | FALSE   | ncbi_filtered | 1292    |
| JN64590_1_1525                | 1292    | JN64590         | Staphylococcus warneri strain LEH1_SA 16S ribosomal RNA gene, partial sequence                                      | 18-Dec-13     | 4-Jan-18      | 1       |     | Staphylococcus warneri                        |                           | Staphylococcus warneri                        | 1534   | 0           | LEH1_SA     | genomic DNA |         | midgut                                       | 1         | 1534     | FALSE   | ncbi_filtered | 1292    |
| KM087099_1_1323               | 1292    | KM087099        | Staphylococcus warneri strain AIMST_Pbp4 16S ribosomal RNA gene, partial sequence                                   | 2-Nov-14      | 4-Jan-18      | 1       |     | Staphylococcus warneri                        |                           | Staphylococcus warneri                        | 1323   | 0           | AIMST_Pbp4  | genomic DNA |         | petiole tissue                               | 1         | 1323     | FALSE   | ncbi_filtered | 1292    |
| KX349994_1_1457               | 1292    | KX349994        | Staphylococcus warneri strain F2-1-6 16S ribosomal RNA gene, partial sequence                                       | 22-Jun-16     | 4-Jan-18      | 1       |     | Staphylococcus warneri                        |                           | Staphylococcus warneri                        | 1457   | 0           | F2-1-6      | genomic DNA |         |                                              | 1         | 1457     | FALSE   | ncbi_filtered | 1292    |
| GU907519_1_1448               | 1302    | GU907519        | Streptococcus gordonii strain C163 16S ribosomal RNA gene, partial sequence                                         | 27-Apr-10     | 4-Jan-18      | 1       |     | Streptococcus gordonii                        |                           | Streptococcus gordonii                        | 1448   | 0           | C163        | genomic DNA |         | sputum of adult cystic fibrosis patient      | 1         | 1448     | FALSE   | ncbi_filtered | 1302    |
| KC589351_1_1327               | 1302    | KC589351        | Streptococcus gordonii strain CHDC B679 16S ribosomal RNA gene, partial sequence                                    | 21-May-13     | 4-Jan-18      | 1       |     | Streptococcus gordonii                        |                           | Streptococcus gordonii                        | 1327   | 0           | CHDC B679   | genomic DNA |         | oral cavity                                  | 1         | 1327     | FALSE   | ncbi_filtered | 1302    |
| LOBS01000001_3335_4896        | 1302    | LOBS01000001    | Streptococcus gordonii strain ATCC 10558 Scaffold10_1, whole genome shotgun sequence                                | 18-Dec-15     | 4-Jan-18      | 1       |     | Streptococcus gordonii                        | WGS                       | Streptococcus gordonii                        | 1562   | 0           | ATCC 10558  | genomic DNA |         | blood                                        | 3335      | 4896     | TRUE    | ncbi_filtered | 1302    |
| NR_115561_1_1413              | 1302    | NR_115561       | Streptococcus gordonii strain NCTC865 16S ribosomal RNA, partial sequence                                           | 24-Oct-17     | 4-Jan-18      | 1       |     | Streptococcus gordonii                        | RefSeq                    | Streptococcus gordonii                        | 1413   | 1           | NCTC865     | rRNA        |         |                                              | 1         | 1413     | TRUE    | ncbi_filtered | 1302    |
| NZ_JWC001000114_218_1768      | 1302    | NZ_JWC001000114 | Streptococcus gordonii strain 1116_SGOR 1340_5102_233807, whole genome shotgun sequence                             | 3-Apr-17      | 4-Jan-18      | 1       |     | Streptococcus gordonii                        | WGS,RefSeq                | Streptococcus gordonii                        | 1551   | 0           | 1116_SGOR   | genomic DNA |         |                                              | 218       | 1768     | FALSE   | ncbi_filtered | 1302    |
| KT898825_1_1354               | 1303    | KT898825        | Streptococcus oralis strain SS276 16S ribosomal RNA gene, partial sequence                                          | 25-Oct-15     | 4-Jan-18      | 1       |     | Streptococcus oralis                          |                           | Streptococcus oralis                          | 1354   | 0           | SS276       | genomic DNA |         |                                              | 1         | 1354     | FALSE   | ncbi_filtered | 1303    |
| NC_015291_185147_186698       | 927666  | NC_015291       | Streptococcus oralis Uo5 complete genome sequence                                                                   | 30-Mar-17     | 4-Jan-18      | 1       |     | Streptococcus oralis Uo5                      | RefSeq,complete genome    | Streptococcus oralis Uo5                      | 1552   | 0           | Uo5         | genomic DNA |         |                                              | 185147    | 186698   | FALSE   | ncbi_filtered | 1303    |
| NR_115734_1_1472              | 1303    | NR_115734       | Streptococcus oralis strain CCUG 24891 16S ribosomal RNA gene, partial sequence                                     | 3-Feb-15      | 4-Jan-18      | 1       |     | Streptococcus oralis                          | RefSeq                    | Streptococcus oralis                          | 1472   | 2           | CCUG 24891  | rRNA        |         |                                              | 1         | 1472     | TRUE    | ncbi_filtered | 1303    |
| NZ_AORX01000001_759545_761909 | 1282665 | NZ_AORX01000001 | Streptococcus oralis subsp. tigurinus 1366 whole genome shotgun sequence                                            | 1-Apr-17      | 4-Jan-18      | 1       |     | Streptococcus oralis subsp. tigurinus 1366    | WGS,RefSeq                | Streptococcus oralis subsp. tigurinus 1366    | 1555   | 0           | 1366        | genomic DNA |         | joint aspirate                               | 759545    | 761909   | FALSE   | ncbi_filtered | 1303    |
| NZ_NCLY01000024_217_1769      | 1458253 | NZ_NCLY01000024 | Streptococcus oralis subsp. dentisani strain RH_70047_11_0, oralis_JW_70047_11_ID_21, whole genome shotgun sequence | 21-Apr-17     | 4-Jan-18      | 1       |     | Streptococcus oralis subsp. dentisani         | WGS,RefSeq                | Streptococcus oralis subsp. dentisani         | 1553   | 0           | RH_70047_11 | genomic DNA |         |                                              | 217       | 1769     | FALSE   | ncbi_filtered | 1303    |
| AF459433_1_1545               | 1304    | AF459433        | Streptococcus salivarius 16S ribosomal RNA gene, partial sequence                                                   | 26-Sep-03     | 4-Jan-18      | 1       |     | Streptococcus salivarius                      |                           | Streptococcus salivarius                      | 1545   | 0           |             | genomic DNA |         |                                              | 1         | 1545     | FALSE   | ncbi_filtered | 1304    |
| GU561396_1_1429               | 1304    | GU561396        | Streptococcus salivarius strain H1_9 16S ribosomal RNA gene, partial sequence                                       | 13-Mar-10     | 4-Jan-18      | 1       |     | Streptococcus salivarius                      |                           | Streptococcus salivarius                      | 1429   | 0           | H1_9        | genomic DNA |         | oral cavity                                  | 1         | 1429     | FALSE   | ncbi_filtered | 1304    |
| KC699126_1_1426               | 1304    | KC699126        | Streptococcus salivarius strain CNM343_12 16S ribosomal RNA gene, partial sequence                                  | 13-Sep-13     | 4-Jan-18      | 1       |     | Streptococcus salivarius                      |                           | Streptococcus salivarius                      | 1426   | 10          | CNM343_12   | genomic DNA |         | ewe bulk tank milk                           | 1         | 1426     | FALSE   | ncbi_filtered | 1304    |
| KM674039_1_1384               | 1304    | KM674039        | Streptococcus salivarius strain MRS_54-1 16S ribosomal RNA gene, partial sequence                                   | 15-Aug-16     | 4-Jan-18      | 1       |     | Streptococcus salivarius                      |                           | Streptococcus salivarius                      | 1384   | 0           | MRS_54-1    | genomic DNA |         | Human fecal sample                           | 1         | 1384     | FALSE   | ncbi_filtered | 1304    |
| NZ_CP014144_1926265_1927816   | 1304    | NZ_CP014144     | Streptococcus salivarius strain JF, complete genome                                                                 | 4-Apr-17      | 4-Jan-18      | 1       |     | Streptococcus salivarius                      | RefSeq                    | Streptococcus salivarius                      | 1552   | 0           | JF          | genomic DNA |         |                                              | 1926265   | 1927816  | FALSE   | ncbi_filtered | 1304    |
| GU561370_1_1451               | 1305    | GU561370        | Streptococcus sanguinis strain GumJ19 16S ribosomal RNA gene, partial sequence                                      | 13-Mar-10     | 4-Jan-18      | 1       |     | Streptococcus sanguinis                       |                           | Streptococcus sanguinis                       | 1451   | 0           | GumJ19      | genomic DNA |         | oral cavity                                  | 1         | 1451     | FALSE   | ncbi_filtered | 1305    |
| KF933773_1_1509               | 1305    | KF933773        | Streptococcus sanguinis strain CHDC B259 16S ribosomal RNA gene, partial sequence                                   | 12-Jun-15     | 4-Jan-18      | 1       |     | Streptococcus sanguinis                       |                           | Streptococcus sanguinis                       | 1509   | 0           | CHDC B259   | genomic DNA |         | oral cavity                                  | 1         | 1509     | FALSE   | ncbi_filtered | 1305    |
| KT887244_1_1429               | 1305    | KT887244        | Streptococcus sanguinis strain IMAU1196 16S ribosomal RNA gene, partial sequence                                    | 14-Oct-15     | 4-Jan-18      | 1       |     | Streptococcus sanguinis                       |                           | Streptococcus sanguinis                       | 1429   | 0           | IMAU1196    | genomic DNA |         |                                              | 1         | 1429     | FALSE   | ncbi_filtered | 1305    |
| NZ_GL831108_3293_4846         | 888825  | NZ_GL831108     | Streptococcus sanguinis VMC66 SCAFFOLD2, whole genome shotgun sequence                                              | 16-Oct-17     | 4-Jan-18      | 1       |     | Streptococcus sanguinis VMC66                 | WGS,STANDARD_DRAFT,RefSeq | Streptococcus sanguinis VMC66                 | 1554   | 0           | VMC66       | genomic DNA |         | blood                                        | 3293      | 4846     | FALSE   | ncbi_filtered | 1305    |
| NZ_LAWK01000009_3391_4946     | 1305    | NZ_LAWK01000009 | Streptococcus sanguinis strain MB451 Contig9, whole genome shotgun sequence                                         | 5-Apr-17      | 4-Jan-18      | 1       |     | Streptococcus sanguinis                       | WGS,RefSeq                | Streptococcus sanguinis                       | 1556   | 0           | MB451       | genomic DNA |         | Subacute bacterial endocarditis              | 3391      | 4946     | FALSE   | ncbi_filtered | 1305    |
| EF990662_1_1553               | 1308    | EF990662        | Streptococcus thermophilus strain T1 16S ribosomal RNA gene, partial sequence                                       | 21-Jul-07     | 4-Jan-18      | 1       |     | Streptococcus thermophilus                    |                           | Streptococcus thermophilus                    | 1553   | 0           | T1          | genomic DNA |         |                                              | 1         | 1553     | FALSE   | ncbi_filtered | 1308    |
| HM058449_1_1473               | 1308    | HM058449        | Streptococcus thermophilus strain MGC21-2 16S ribosomal RNA gene, partial sequence                                  | 22-Jun-12     | 4-Jan-18      | 1       |     | Streptococcus thermophilus                    |                           | Streptococcus thermophilus                    | 1473   | 0           | MGC21-2     | genomic DNA |         |                                              | 1         | 1473     | FALSE   | ncbi_filtered | 1308    |
| HQ293114_1_1345               | 1308    | HQ293114        | Streptococcus thermophilus strain NWL91 16S ribosomal RNA gene, partial sequence                                    | 10-Mar-11     | 4-Jan-18      | 1       |     | Streptococcus thermophilus                    |                           | Streptococcus thermophilus                    | 1345   | 0           | NWL91       | genomic DNA |         |                                              | 1         | 1345     | FALSE   | ncbi_filtered | 1308    |
| KM257649_1_1454               | 1308    | KM257649        | Streptococcus thermophilus strain WV550 16S ribosomal RNA gene, partial sequence                                    | 8-Nov-14      | 4-Jan-18      | 1       |     | Streptococcus thermophilus                    |                           | Streptococcus thermophilus                    | 1454   | 0           | WV550       | genomic DNA |         | wooden dairy equipment                       | 1         | 1454     | FALSE   | ncbi_filtered | 1308    |
| NR_042778_1_1539              | 1308    | NR_042778       | Streptococcus thermophilus strain ATCC 19258 16S ribosomal RNA, partial sequence                                    | 24-Oct-17     | 4-Jan-18      | 1       |     | Streptococcus thermophilus                    | RefSeq                    | Streptococcus thermophilus                    | 1539   | 0           | ATCC 19258  | rRNA        |         |                                              | 1         | 1539     | TRUE    | ncbi_filtered | 1308    |
| CP019803_171703_173245        | 1311    | CP019803        | Streptococcus agalactiae strain SA73, complete genome                                                               | 16-Jan-18     | 22-Jan-18     | 1       |     | Streptococcus agalactiae                      |                           | Streptococcus agalactiae                      | 1543   | 0           | SA73        | genomic DNA |         | brain                                        | 171703    | 173245   | FALSE   | ncbi_filtered | 1311    |
| JF423942_1_1502               | 1311    | JF423942        | Streptococcus agalactiae strain HN0201 16S ribosomal RNA gene, partial sequence                                     | 18-Apr-11     | 4-Jan-18      | 1       |     | Streptococcus agalactiae                      |                           | Streptococcus agalactiae                      | 1502   | 0           | HN0201      | genomic DNA |         |                                              | 1         | 1502     | FALSE   | ncbi_filtered | 1311    |
| JF423947_1_1495               | 1311    | JF423947        | Streptococcus agalactiae strain HN0303 16S ribosomal RNA gene, partial sequence                                     | 18-Apr-11     | 4-Jan-18      | 1       |     | Streptococcus agalactiae                      |                           | Streptococcus agalactiae                      | 1495   | 0           | HN0303      | genomic DNA |         |                                              | 1         | 1495     | FALSE   | ncbi_filtered | 1311    |
| KF792055_1_1477               | 1311    | KF792055        | Streptococcus agalactiae strain m1 16S ribosomal RNA gene, partial sequence                                         | 7-Oct-14      | 4-Jan-18      | 1       |     | Streptococcus agalactiae                      |                           | Streptococcus agalactiae                      | 1477   | 0           | m1          | genomic DNA |         |                                              | 1         | 1477     | FALSE   | ncbi_filtered | 1311    |
| NZ_ATOR01000028_121_1676      | 1333574 | NZ_ATOR01000028 | Streptococcus agalactiae MC629 16S ribosomal RNA gene, partial sequence                                             | 18-Mar-17     | 4-Jan-18      | 1       |     | Streptococcus agalactiae MC629                | WGS,RefSeq                | Streptococcus agalactiae MC629                | 1556   | 0           | MC629       | genomic DNA |         | stool sample of individual with bacteremia   | 121       | 1676     | FALSE   | ncbi_filtered | 1311    |
| GU907525_1_1420               | 1313    | GU907525        | Streptococcus pneumoniae strain C30 16S ribosomal RNA gene, partial sequence                                        | 27-Apr-10     | 4-Jan-18      | 1       |     | Streptococcus pneumoniae                      |                           | Streptococcus pneumoniae                      | 1420   | 0           | C30         | genomic DNA |         | sputum of adult cystic fibrosis patient      | 1         | 1420     | FALSE   | ncbi_filtered | 1313    |
| JBOV01000016_1854_3407        | 1449970 | JBOV01000016    | Streptococcus pneumoniae B1598 whole genome shotgun sequence                                                        | 11-Aug-17     | 4-Jan-18      | 1       |     | Streptococcus pneumoniae B1598                | WGS                       | Streptococcus pneumoniae B1598                | 1554   | 0           | B1598       | genomic DNA |         | ocular swab                                  | 1854      | 3407     | FALSE   | ncbi_filtered | 1313    |
| NZ_CKVA01000001_562_2114      | 1313    | NZ_CKVA01000001 | Streptococcus pneumoniae strain SMRU2014, whole genome shotgun sequence                                             | 10-Mar-17     | 4-Jan-18      | 1       |     | Streptococcus pneumoniae                      | WGS,RefSeq                | Streptococcus pneumoniae                      | 1553   | 0           | SMRU2014    | genomic DNA |         | nasopharynx                                  | 562       | 2114     | FALSE   | ncbi_filtered | 1313    |
| NZ_CPKU01000074_51_1602       | 1313    | NZ_CPKU01000074 | Streptococcus pneumoniae strain LMG1250, whole genome shotgun sequence                                              | 11-Mar-17     | 4-Jan-18      | 1       |     | Streptococcus pneumoniae                      | WGS,RefSeq                | Streptococcus pneumoniae                      | 1552   | 0           | LMG1250     | genomic DNA |         | not known                                    | 51        | 1602     | FALSE   | ncbi_filtered | 1313    |
| NZ_FYVG01000005_7574_9126     | 1313    | NZ_FYVG01000005 | Streptococcus pneumoniae strain Uo54385, whole genome shotgun sequence                                              | 5-Jul-17      | 4-Jan-18      | 1       |     | Streptococcus pneumoniae                      | WGS,RefSeq                | Streptococcus pneumoniae                      | 1553   | 0           | Uo54385     | genomic DNA |         | Nasopharynx                                  | 7574      | 9126     | FALSE   | ncbi_filtered | 1313    |
| AEK01000012_1_1384            | 905067  | AEK01000012     | Streptococcus parasanguinis strain F0405, whole genome shotgun sequence                                             | 7-Jun-13      | 4-Jan-18      | 1       |     | Streptococcus parasanguinis F0405             | WGS,HIGH_QUALITY_DRAFT    | Streptococcus parasanguinis F0405             | 1384   | 0           | F0405       | genomic DNA |         |                                              | 1         | 1384     | FALSE   | ncbi_filtered | 1318    |
| KC817218_1_1421               | 1318    | KC817218        | Streptococcus parasanguinis strain C357 16S ribosomal RNA gene, partial sequence                                    | 3-Jul-14      | 4-Jan-18      | 1       |     | Streptococcus parasanguinis                   |                           | Streptococcus parasanguinis                   | 1421   | 1           | C357        | genomic DNA |         | Southern Alberta Cystic Fibrosis Clinic      | 1         | 1421     | FALSE   | ncbi_filtered | 1318    |
| KF933795_1_1509               | 1318    | KF933795        | Streptococcus parasanguinis strain CHDC B671 16S ribosomal RNA gene, partial sequence                               | 12-Jun-15     | 4-Jan-18      | 1       |     | Streptococcus parasanguinis                   |                           | Streptococcus parasanguinis                   | 1509   | 0           | CHDC B671   | genomic DNA |         | oral cavity                                  | 1         | 1509     | FALSE   | ncbi_filtered | 1318    |
| NC_017905_17269_18824         | 1114965 | NC_017905       | Streptococcus parasanguinis strain FW213, complete genome                                                           | 30-Mar-17     | 4-Jan-18      | 1       |     | Streptococcus parasanguinis FW213             | RefSeq                    | Streptococcus parasanguinis FW213             | 1556   | 0           | FW213       | genomic DNA |         |                                              | 17269     | 18824    | FALSE   | ncbi_filtered | 1318    |
| NZ_VEO01000014_27164_28718    | 1318    | NZ_VEO01000014  | Streptococcus parasanguinis strain 512_SPAR 418_32054_713                                                           |               |               |         |     |                                               |                           |                                               |        |             |             |             |         |                                              |           |          |         |               |         |



| seqname                         | tax_id  | accession       | description                                                                                      | modified_date | download_date | version_num | source                             | keywords                        | organism                           | length | ambig_count | strain           | mol_type    | isolate   | isolation_source                   | seq_start | seq_stop | is_type | collection    | species |
|---------------------------------|---------|-----------------|--------------------------------------------------------------------------------------------------|---------------|---------------|-------------|------------------------------------|---------------------------------|------------------------------------|--------|-------------|------------------|-------------|-----------|------------------------------------|-----------|----------|---------|---------------|---------|
| KR26015_1_1500                  | 1351    | KR26015         | Enterococcus faecalis strain CGLB146 16S ribosomal RNA gene, partial sequence                    | 12-Mar-14     | 4-Jan-18      | 1           | Enterococcus faecalis              |                                 | Enterococcus faecalis              | 1500   | 0           | CGLB146          | genomic DNA |           | rennet                             | 1         | 1500     | FALSE   | ncbi_filtered | 1351    |
| KU317789_1_1369                 | 1351    | KU317789        | Enterococcus faecalis strain M2 16S ribosomal RNA gene, partial sequence                         | 25-May-16     | 4-Jan-18      | 1           | Enterococcus faecalis              |                                 | Enterococcus faecalis              | 1369   | 0           | M2               | genomic DNA |           |                                    | 1         | 1369     | FALSE   | ncbi_filtered | 1351    |
| KO37542_1_1313                  | 1351    | KO37542         | Enterococcus faecalis strain L1A1M6 16S ribosomal RNA gene, partial sequence                     | 31-Oct-16     | 4-Jan-18      | 1           | Enterococcus faecalis              |                                 | Enterococcus faecalis              | 1313   | 0           | L1A1M6           | genomic DNA |           | cheese                             | 1         | 1313     | FALSE   | ncbi_filtered | 1351    |
| NZ_LUOP01000215_60_1661         | 1351    | NZ_LUOP01000215 | Enterococcus faecalis strain 903_EFLS 894_1831_221977_674_38N_199_ whole genome shotgun sequence | 26-Mar-17     | 4-Jan-18      | 1           | Enterococcus faecalis              | WGS,RefSeq                      | Enterococcus faecalis              | 1602   | 0           | 903_EFLS         | genomic DNA |           |                                    | 60        | 1661     | FALSE   | ncbi_filtered | 1351    |
| AY12570_1_1555                  | 1352    | AY12570         | Enterococcus faecium 16S ribosomal RNA gene, complete sequence                                   | 23-Dec-02     | 4-Jan-18      | 1           | Enterococcus faecium               |                                 | Enterococcus faecium               | 1555   | 1           |                  | genomic DNA |           |                                    | 1         | 1555     | FALSE   | ncbi_filtered | 1352    |
| JX19730_1_1421                  | 1352    | JX19730         | Enterococcus faecium strain KW13 16S ribosomal RNA gene, partial sequence                        | 20-Mar-13     | 4-Jan-18      | 1           | Enterococcus faecium               |                                 | Enterococcus faecium               | 1421   | 0           | KW13             | genomic DNA |           |                                    | 1         | 1421     | FALSE   | ncbi_filtered | 1352    |
| JX27809_1_1519                  | 1352    | JX27809         | Enterococcus faecium strain Arla-18 16S ribosomal RNA gene, partial sequence                     | 10-Sep-12     | 4-Jan-18      | 1           | Enterococcus faecium               |                                 | Enterococcus faecium               | 1519   | 0           | Arla-18          | genomic DNA |           | Arla Fontina cheese                | 1         | 1519     | FALSE   | ncbi_filtered | 1352    |
| KO062013_1_1456                 | 1352    | KO062013        | Enterococcus faecium strain L286 16S ribosomal RNA gene, partial sequence                        | 19-May-17     | 4-Jan-18      | 2           | Enterococcus faecium               |                                 | Enterococcus faecium               | 1456   | 0           | L286             | genomic DNA |           |                                    | 1         | 1456     | FALSE   | ncbi_filtered | 1352    |
| LC03808_1_1546                  | 1352    | LC03808         | Enterococcus faecium gene for 16S ribosomal RNA, partial sequence, isolate: W39                  | 12-Sep-15     | 4-Jan-18      | 1           | Enterococcus faecium               |                                 | Enterococcus faecium               | 1546   | 0           |                  | genomic DNA | W39       | human feces                        | 1         | 1546     | FALSE   | ncbi_filtered | 1352    |
| EF025908_1_1546                 | 1353    | EF025908        | Enterococcus gallinarum strain 228 16S ribosomal RNA gene, partial sequence                      | 12-Oct-07     | 4-Jan-18      | 1           | Enterococcus gallinarum            |                                 | Enterococcus gallinarum            | 1546   | 0           | 228              | genomic DNA |           | rumen of methanogen-free sheep     | 1         | 1546     | FALSE   | ncbi_filtered | 1353    |
| FJ380127_1_1435                 | 1353    | FJ380127        | Enterococcus gallinarum strain Ags-8 16S ribosomal RNA gene, partial sequence                    | 1-Nov-11      | 4-Jan-18      | 1           | Enterococcus gallinarum            |                                 | Enterococcus gallinarum            | 1435   | 0           | Ags-8            | genomic DNA |           |                                    | 1         | 1435     | FALSE   | ncbi_filtered | 1353    |
| GU811873_1_1421                 | 1353    | GU811873        | Enterococcus gallinarum strain SWP01 16S ribosomal RNA gene, partial sequence                    | 17-Apr-10     | 4-Jan-18      | 1           | Enterococcus gallinarum            |                                 | Enterococcus gallinarum            | 1421   | 0           | SWP01            | genomic DNA |           |                                    | 1         | 1421     | FALSE   | ncbi_filtered | 1353    |
| KP254559_1_1465                 | 1353    | KP254559        | Enterococcus gallinarum strain 998 (BR46) 16S ribosomal RNA gene, partial sequence               | 26-Feb-15     | 4-Jan-18      | 1           | Enterococcus gallinarum            |                                 | Enterococcus gallinarum            | 1465   | 0           | 998 (BR46)       | genomic DNA |           | female host midgut                 | 1         | 1465     | FALSE   | ncbi_filtered | 1353    |
| MG231265_1_1466                 | 1353    | MG231265        | Enterococcus gallinarum strain DBS-LAZ-10/17 16S ribosomal RNA gene, partial sequence            | 25-Oct-17     | 4-Jan-18      | 1           | Enterococcus gallinarum            |                                 | Enterococcus gallinarum            | 1466   | 0           | DBS-LAZ-10/17    | genomic DNA |           |                                    | 1         | 1466     | FALSE   | ncbi_filtered | 1353    |
| GU255468_1_1349                 | 1354    | GU255468        | Enterococcus hirae strain ST3 16S ribosomal RNA gene, partial sequence                           | 1-Feb-10      | 4-Jan-18      | 1           | Enterococcus hirae                 |                                 | Enterococcus hirae                 | 1349   | 2           | ST3              | genomic DNA |           | goat milk                          | 1         | 1349     | FALSE   | ncbi_filtered | 1354    |
| KC113201_1_1467                 | 1354    | KC113201        | Enterococcus hirae strain K34 16S ribosomal RNA gene, partial sequence                           | 9-Jan-13      | 4-Jan-18      | 1           | Enterococcus hirae                 |                                 | Enterococcus hirae                 | 1467   | 0           | K34              | genomic DNA |           | kung-som                           | 1         | 1467     | FALSE   | ncbi_filtered | 1354    |
| KT761039_1_1404                 | 1354    | KT761039        | Enterococcus hirae strain RCB827 16S ribosomal RNA gene, partial sequence                        | 19-Sep-15     | 4-Jan-18      | 1           | Enterococcus hirae                 |                                 | Enterococcus hirae                 | 1404   | 0           | RCB827           | genomic DNA |           | bat guano                          | 1         | 1404     | FALSE   | ncbi_filtered | 1354    |
| KO752826_1_1465                 | 1354    | KO752826        | Enterococcus hirae strain SNNU0205 16S ribosomal RNA gene, partial sequence                      | 23-Aug-16     | 4-Jan-18      | 1           | Enterococcus hirae                 |                                 | Enterococcus hirae                 | 1465   | 0           | SNNU0205         | genomic DNA |           |                                    | 1         | 1465     | FALSE   | ncbi_filtered | 1354    |
| MF326301_1_1478                 | 1354    | MF326301        | Enterococcus hirae strain 1-W-14 16S ribosomal RNA gene, partial sequence                        | 18-Jun-17     | 4-Jan-18      | 1           | Enterococcus hirae                 |                                 | Enterococcus hirae                 | 1478   | 1           | 1-W-14           | genomic DNA |           |                                    | 1         | 1478     | FALSE   | ncbi_filtered | 1354    |
| AM157431_1_1554                 | 1358    | AM157431        | Lactococcus lactis 16S rRNA gene, clone SC4                                                      | 16-Mar-07     | 4-Jan-18      | 1           | Lactococcus lactis                 | 16S ribosomal RNA;16S rRNA gene | Lactococcus lactis                 | 1554   | 0           |                  | genomic DNA | mother C4 | breast milk                        | 1         | 1554     | FALSE   | ncbi_filtered | 1358    |
| HO286592_1_1435                 | 1358    | HO286592        | Lactococcus lactis strain LC 16S ribosomal RNA gene, partial sequence                            | 10-Nov-10     | 4-Jan-18      | 1           | Lactococcus lactis                 |                                 | Lactococcus lactis                 | 1435   | 0           | LC               | genomic DNA |           | pickled vegetable                  | 1         | 1435     | FALSE   | ncbi_filtered | 1358    |
| KT124581_1_1427                 | 1358    | KT124581        | Lactococcus lactis strain PT570 16S ribosomal RNA gene, partial sequence                         | 13-Sep-15     | 4-Jan-18      | 1           | Lactococcus lactis                 |                                 | Lactococcus lactis                 | 1427   | 0           | PT570            | genomic DNA |           | vestedda-like cheese               | 1         | 1427     | FALSE   | ncbi_filtered | 1358    |
| MS5836_1_1496                   | 1359    | MS5836          | Streptococcus cremoris 16S ribosomal RNA                                                         | 27-Apr-93     | 4-Jan-18      | 1           | Lactococcus lactis subsp. cremoris | 16S ribosomal RNA               | Lactococcus lactis subsp. cremoris | 1496   | 9           |                  | rRNA        |           |                                    | 1         | 1496     | FALSE   | ncbi_filtered | 1358    |
| MG754632_1_1451                 | 1358    | MG754632        | Lactococcus lactis strain Sourdough_N6 16S ribosomal RNA gene, partial sequence                  | 11-Jan-18     | 22-Jan-18     | 1           | Lactococcus lactis                 |                                 | Lactococcus lactis                 | 1451   | 0           | Sourdough_N6     | genomic DNA |           |                                    | 1         | 1451     | FALSE   | ncbi_filtered | 1358    |
| KV083747_1_1506                 | 1376    | KV083747        | Aerococcus urinae strain 16H-271M0669 16S ribosomal RNA gene, partial sequence                   | 21-Oct-17     | 4-Jan-18      | 1           | Aerococcus urinae                  |                                 | Aerococcus urinae                  | 1506   | 0           | 16H-271M0669     | genomic DNA |           | urine                              | 1         | 1506     | FALSE   | ncbi_filtered | 1376    |
| NZ_015278_1342385_1343939       | 866775  | NC_015278       | Aerococcus urinae ACS-120-V-Col10a, complete genome                                              | 7-Apr-17      | 4-Jan-18      | 1           | Aerococcus urinae ACS-120-V-Col10a | RefSeq                          | Aerococcus urinae ACS-120-V-Col10a | 1555   | 0           | ACS-120-V-Col10a | genomic DNA |           |                                    | 1342385   | 1343939  | FALSE   | ncbi_filtered | 1376    |
| PNG80100004_3990_5544           | 1376    | PNG80100004     | Aerococcus urinae strain UMB0072b_21837_8_75.4, whole genome shotgun sequence                    | 10-Jan-18     | 12-Jan-18     | 1           | Aerococcus urinae                  | WGS                             | Aerococcus urinae                  | 1555   | 0           | UMB0072b         | genomic DNA |           | catheter                           | 3990      | 5544     | FALSE   | ncbi_filtered | 1376    |
| PHN50100027_736_2290            | 1376    | PHN50100027     | Aerococcus urinae strain UMB0088_10933_8_23.27, whole genome shotgun sequence                    | 10-Jan-18     | 12-Jan-18     | 1           | Aerococcus urinae                  | WGS                             | Aerococcus urinae                  | 1555   | 0           | UMB0088          | genomic DNA |           | catheter                           | 736       | 2290     | FALSE   | ncbi_filtered | 1376    |
| U64457_1_1484                   | 1376    | U64457          | Aerococcus urinae 16S ribosomal RNA                                                              | 1-Nov-96      | 4-Jan-18      | 1           | Aerococcus urinae                  |                                 | Aerococcus urinae                  | 1484   | 1           | G1-84            | genomic DNA |           |                                    | 1         | 1484     | FALSE   | ncbi_filtered | 1376    |
| JF496443_1_1427                 | 1377    | JF496443        | Aerococcus viridans strain EA52-14 16S ribosomal RNA gene, partial sequence                      | 19-Aug-11     | 4-Jan-18      | 1           | Aerococcus viridans                |                                 | Aerococcus viridans                | 1427   | 0           | EA52-14          | genomic DNA |           | soil crust                         | 1         | 1427     | FALSE   | ncbi_filtered | 1377    |
| KV861729_1_1385                 | 1377    | KV861729        | Aerococcus viridans strain IRP51 16S ribosomal RNA gene, partial sequence                        | 9-Apr-17      | 4-Jan-18      | 1           | Aerococcus viridans                |                                 | Aerococcus viridans                | 1245   | 0           | IRP51            | genomic DNA |           | sugarcane rhizosphere soil         | 1         | 1245     | FALSE   | ncbi_filtered | 1377    |
| MF429267_1_1246                 | 1377    | MF429267        | Aerococcus viridans strain CAU9683 16S ribosomal RNA gene, partial sequence                      | 10-Aug-17     | 4-Jan-18      | 1           | Aerococcus viridans                |                                 | Aerococcus viridans                | 1386   | 0           | CAU9683          | genomic DNA |           | rubing                             | 1         | 1386     | FALSE   | ncbi_filtered | 1377    |
| MG576151_1_1494                 | 1377    | MG576151        | Aerococcus viridans strain SNSK 102 16S ribosomal RNA gene, partial sequence                     | 5-Dec-17      | 4-Jan-18      | 1           | Aerococcus viridans                |                                 | Aerococcus viridans                | 1494   | 0           | SNSK 102         | genomic DNA |           | Neonatal Blood samples             | 1         | 1494     | FALSE   | ncbi_filtered | 1377    |
| NR_118723_1_1497                | 1377    | NR_118723       | Aerococcus viridans strain ATCC 11563 16S ribosomal RNA, partial sequence                        | 27-Oct-17     | 4-Jan-18      | 2           | Aerococcus viridans                | RefSeq                          | Aerococcus viridans                | 1497   | 0           | ATCC 11563       | rRNA        |           |                                    | 1         | 1497     | TRUE    | ncbi_filtered | 1377    |
| AM157450_1_1517                 | 1379    | AM157450        | Gemella haemolysans 16S rRNA gene, clone 12V4                                                    | 16-Mar-07     | 4-Jan-18      | 1           | Gemella haemolysans                | 16S ribosomal RNA;16S rRNA gene | Gemella haemolysans                | 1497   | 1           |                  | genomic DNA | mother V4 | breast milk                        | 1         | 1517     | FALSE   | ncbi_filtered | 1379    |
| GU561408_1_1297                 | 1379    | GU561408        | Gemella haemolysans strain GumJ21A 16S ribosomal RNA gene, partial sequence                      | 13-Mar-10     | 4-Jan-18      | 1           | Gemella haemolysans                |                                 | Gemella haemolysans                | 1297   | 0           | GumJ21A          | genomic DNA |           |                                    | 1         | 1297     | FALSE   | ncbi_filtered | 1379    |
| JF803540_1_1432                 | 1379    | JF803540        | Gemella haemolysans strain M347 16S ribosomal RNA gene, partial sequence                         | 8-May-11      | 4-Jan-18      | 1           | Gemella haemolysans                |                                 | Gemella haemolysans                | 1432   | 0           | M347             | genomic DNA |           | oral cavity                        | 1         | 1432     | FALSE   | ncbi_filtered | 1379    |
| NZ_ACD02000012_336_1896         | 546270  | NZ_ACD02000012  | Gemella haemolysans ATCC 10379 cti119035638548, whole genome shotgun sequence                    | 7-Apr-17      | 4-Jan-18      | 1           | Gemella haemolysans ATCC 10379     | WGS,RefSeq                      | Gemella haemolysans ATCC 10379     | 1561   | 0           | ATCC 10379       | genomic DNA |           | biological product [DNVO:02000043] | 336       | 1896     | TRUE    | ncbi_filtered | 1379    |
| NZ_GL883587_3994_5528           | 562981  | NZ_GL883587     | Gemella haemolysans M341 supercont1.6, whole genome shotgun sequence                             | 7-Apr-17      | 4-Jan-18      | 1           | Gemella haemolysans M341           | WGS,HIGH_QUALITY_DRAFT,RefSeq   | Gemella haemolysans M341           | 1535   | 0           | M341             | genomic DNA |           |                                    | 3994      | 5528     | FALSE   | ncbi_filtered | 1379    |
| LC038309_1_1481                 | 1381    | LC038309        | Atopobium minutum gene for 16S ribosomal RNA, partial sequence, strain JCM 1118                  | 20-Mar-15     | 4-Jan-18      | 1           | Atopobium minutum                  |                                 | Atopobium minutum                  | 1481   | 0           | JCM 1118         | genomic DNA |           |                                    | 1         | 1481     | TRUE    | ncbi_filtered | 1381    |
| MF375481_1_1338                 | 1381    | MF375481        | Atopobium minutum strain DSM 20585 16S ribosomal RNA gene, partial sequence                      | 11-Oct-17     | 4-Jan-18      | 1           | Atopobium minutum                  |                                 | Atopobium minutum                  | 1338   | 0           | DSM 20585        | genomic DNA |           |                                    | 1         | 1338     | FALSE   | ncbi_filtered | 1381    |
| NR_044838_1_1454                | 1381    | NR_044838       | Atopobium minutum strain NCFB 2751 16S ribosomal RNA, partial sequence                           | 24-Oct-17     | 4-Jan-18      | 1           | Atopobium minutum                  | RefSeq                          | Atopobium minutum                  | 1454   | 2           | NCFB 2751        | rRNA        |           |                                    | 1         | 1454     | TRUE    | ncbi_filtered | 1381    |
| NR_117765_1_1345                | 1381    | NR_117765       | Atopobium minutum strain DSM 20586 16S ribosomal RNA gene, partial sequence                      | 3-Feb-15      | 4-Jan-18      | 1           | Atopobium minutum                  | RefSeq                          | Atopobium minutum                  | 1345   | 1           | DSM 20586        | rRNA        |           |                                    | 1         | 1345     | TRUE    | ncbi_filtered | 1381    |
| NZ_FNSH01000001_1347283_1348808 | 1381    | NZ_FNSH01000001 | Atopobium minutum strain DSM 20586, whole genome shotgun sequence                                | 13-Apr-17     | 4-Jan-18      | 1           | Atopobium minutum                  | WGS,RefSeq                      | Atopobium minutum                  | 1526   | 0           | DSM 20586        | genomic DNA |           |                                    | 1347283   | 1348808  | TRUE    | ncbi_filtered | 1381    |
| KF933801_1_1472                 | 1382    | KF933801        | Atopobium parvulum strain CHDC 8703 16S ribosomal RNA gene, partial sequence                     | 12-Jun-15     | 4-Jan-18      | 1           | Atopobium parvulum                 |                                 | Atopobium parvulum                 | 1472   | 0           | CHDC 8703        | genomic DNA |           | oral cavity                        | 1         | 1472     | FALSE   | ncbi_filtered | 1382    |
| NC_013203_1457021_1458537       | 521095  | NC_013203       | Atopobium parvulum DSM 20469, complete genome                                                    | 7-Apr-17      | 4-Jan-18      | 1           | Atopobium parvulum DSM 20469       | RefSeq                          | Atopobium parvulum DSM 20469       | 1517   | 0           | DSM 20469        | genomic DNA |           |                                    | 1457021   | 1458537  | TRUE    | ncbi_filtered | 1382    |
| NZ_IRND01000008_282_1798        | 1287474 | NZ_IRND01000008 | Atopobium parvulum DNF0906 contig8, whole genome shotgun sequence                                | 9-Apr-17      | 4-Jan-18      | 1           | Atopobium parvulum DNF0906         | WGS,HIGH_QUALITY_DRAFT,RefSeq   | Atopobium parvulum DNF0906         | 1517   | 0           | DNF0906          | genomic DNA |           | vagina                             | 282       | 1798     | FALSE   | ncbi_filtered | 1382    |
| SA4206_1_1396                   | 1382    | SA4206          | 16S rRNA [Streptococcus parvulus, rRNA Partial, 1396 nt]                                         | 8-May-93      | 4-Jan-18      | 1           | Atopobium parvulum                 |                                 | Atopobium parvulum                 | 1396   | 0           |                  | rRNA        |           |                                    | 1         | 1396     | FALSE   | ncbi_filtered | 1382    |
| DO981456_1_1371                 | 1397    | DO981456        | Bacillus circulans isolate SB1 16S ribosomal RNA gene, partial sequence                          | 3-Aug-07      | 4-Jan-18      | 1           | Bacillus circulans                 |                                 | Bacillus circulans                 | 1371   | 0           |                  | genomic DNA | SB1       | agricultural soil                  | 1         | 1371     | FALSE   | ncbi_filtered | 1397    |
| EU116046_1_1314                 | 1397    | EU116046        | Bacillus circulans strain D1 16S ribosomal RNA gene, partial sequence                            | 17-Jun-10     | 4-Jan-18      | 1           | Bacillus circulans                 |                                 | Bacillus circulans                 | 1314   | 0           | D1               | genomic DNA |           | soil                               | 1         | 1314     | FALSE   | ncbi_filtered | 1397    |
| JQ337953_1_1441                 | 1397    | JQ337953        | Bacillus circulans strain HT-200 16S ribosomal RNA gene, partial sequence                        | 21-Apr-12     | 4-Jan-18      | 1           | Bacillus circulans                 |                                 | Bacillus circulans                 | 1441   | 0           | L2               | genomic DNA |           | Lonar Lake                         | 1         | 1441     | FALSE   | ncbi_filtered | 1397    |
| KS26907_1_1456                  | 1397    | KS26907         | Bacillus circulans strain HT-200 16S ribosomal RNA gene, partial sequence                        | 18-Jun-14     | 4-Jan-18      | 1           | Bacillus circulans                 |                                 | Bacillus circulans                 | 1456   | 0           | HT-200           | genomic DNA |           |                                    |           |          |         |               |         |

| seqname                        | tax_id  | accession      | description                                                                                    | modified_date | download_date | version | num | source | keywords                               | organism                                        | length | ambig_count | strain       | mol_type    | isolate | isolation_source                                                   | seq_start | seq_end | is_type | collection    | species |
|--------------------------------|---------|----------------|------------------------------------------------------------------------------------------------|---------------|---------------|---------|-----|--------|----------------------------------------|-------------------------------------------------|--------|-------------|--------------|-------------|---------|--------------------------------------------------------------------|-----------|---------|---------|---------------|---------|
| NZ_PDH01000004_7726_9215       | 1509    | NZ_PDH01000004 | Clostridium sporogenes strain FDAARGOS_423 pAMERTCC_44.contig.3, whole genome shotgun sequence | 20-Oct-17     | 4-Jan-18      | 1       |     |        | WGS,RefSeq                             | Clostridium sporogenes                          | 1490   | 0           | FDAARGOS_423 | genomic DNA |         | Cotton plant                                                       | 7726      | 9215    | FALSE   | ncbi_filtered | 1509    |
| GQ456207_1_1440                | 1522    | GQ456207       | [Clostridium] innocuum strain A-C3-1 16S ribosomal RNA gene, partial sequence                  | 1-May-15      | 4-Jan-18      | 2       |     |        | [Clostridium] innocuum                 | [Clostridium] innocuum                          | 1440   | 0           | A-C3-1       | genomic DNA |         | caecum of a male wild-type C57BL/6 mouse                           | 1         | 1440    | FALSE   | ncbi_filtered | 1522    |
| HQ259734_1_1476                | 1522    | HQ259734       | Clostridium innocuum strain LCR25 16S ribosomal RNA gene, partial sequence                     | 15-Nov-10     | 4-Jan-18      | 1       |     |        | [Clostridium] innocuum                 | [Clostridium] innocuum                          | 1476   | 1           | LCR25        | genomic DNA |         | infant feces                                                       | 1         | 1476    | FALSE   | ncbi_filtered | 1522    |
| KR364751_1_1526                | 1522    | KR364751       | [Clostridium] innocuum strain 146 16S ribosomal RNA gene, partial sequence                     | 28-Nov-16     | 4-Jan-18      | 1       |     |        | [Clostridium] innocuum                 | [Clostridium] innocuum                          | 1526   | 0           | 146          | genomic DNA |         | gut                                                                | 1         | 1526    | FALSE   | ncbi_filtered | 1522    |
| NZ_KB850943_1733812_1735360    | 999413  | NZ_KB850943    | [Clostridium] innocuum 2959 acBmF-supercorn1.1, whole genome shotgun sequence                  | 19-May-17     | 4-Jan-18      | 1       |     |        | WGS,HIGH_QUALITY_DRAFT,RefSeq          | [Clostridium] innocuum 2959                     | 1549   | 0           | 2959         | genomic DNA |         |                                                                    | 1733812   | 1735360 | FALSE   | ncbi_filtered | 1522    |
| NZ_NXN01000003_1013619_1015160 | 1522    | NZ_NXN01000003 | [Clostridium] innocuum strain 2959 unlitg_0_quiver, whole genome shotgun sequence              | 12-Dec-17     | 4-Jan-18      | 1       |     |        | WGS,RefSeq                             | [Clostridium] innocuum                          | 1542   | 0           | 2959         | genomic DNA |         |                                                                    | 1013619   | 1015160 | FALSE   | ncbi_filtered | 1522    |
| AV699288_1_1524                | 1547    | AV699288       | Clostridium ramosum isolate M91 16S ribosomal RNA gene, partial sequence                       | 29-Aug-04     | 4-Jan-18      | 1       |     |        | RefSeq                                 | Erysipelatoclostridium ramosum                  | 1524   | 0           |              | genomic DNA | M91     | camel digestive system                                             | 1         | 1524    | FALSE   | ncbi_filtered | 1547    |
| NR_029247_1_1519               | 1547    | NR_029247      | Erysipelatoclostridium ramosum strain 113-1 16S ribosomal RNA gene, partial sequence           | 3-Feb-15      | 4-Jan-18      | 1       |     |        | RefSeq                                 | Erysipelatoclostridium ramosum                  | 1519   | 0           | 113-1        | rRNA        |         |                                                                    | 1         | 1519    | TRUE    | ncbi_filtered | 1547    |
| NZ_DS499659_225009_226541      | 445974  | NZ_DS499659    | Erysipelatoclostridium ramosum DSM 1402 ScfII_02_10, whole genome shotgun sequence             | 7-Apr-17      | 4-Jan-18      | 1       |     |        | WGS,RefSeq                             | Erysipelatoclostridium ramosum DSM 1402         | 1533   | 0           | DSM 1402     | genomic DNA |         | biological product (ENVO:02000043)                                 | 225009    | 226541  | TRUE    | ncbi_filtered | 1547    |
| NC_015565_181837_183375        | 868595  | NC_015565      | Desulfotomaculum nigrificans CO-1-SRB, complete genome                                         | 4-Sep-17      | 4-Jan-18      | 1       |     |        | RefSeq                                 | Desulfotomaculum nigrificans CO-1-SRB           | 1539   | 0           | CO-1-SRB     | genomic DNA |         | sludge from an anaerobic bioreactor treating paper mill wastewater | 181837    | 183375  | FALSE   | ncbi_filtered | 1565    |
| NC_015565_437107_438646        | 868595  | NC_015565      | Desulfotomaculum nigrificans CO-1-SRB, complete genome                                         | 4-Sep-17      | 4-Jan-18      | 1       |     |        | RefSeq                                 | Desulfotomaculum nigrificans CO-1-SRB           | 1540   | 0           | CO-1-SRB     | genomic DNA |         | sludge from an anaerobic bioreactor treating paper mill wastewater | 437107    | 438646  | FALSE   | ncbi_filtered | 1565    |
| NC_015565_538814_540351        | 868595  | NC_015565      | Desulfotomaculum nigrificans CO-1-SRB, complete genome                                         | 4-Sep-17      | 4-Jan-18      | 1       |     |        | RefSeq                                 | Desulfotomaculum nigrificans CO-1-SRB           | 1538   | 0           | CO-1-SRB     | genomic DNA |         | sludge from an anaerobic bioreactor treating paper mill wastewater | 538814    | 540351  | FALSE   | ncbi_filtered | 1565    |
| NR_044832_1_1430               | 1565    | NR_044832      | Desulfotomaculum nigrificans strain NCIMB 8395 16S ribosomal RNA, partial sequence             | 24-Oct-17     | 4-Jan-18      | 2       |     |        | RefSeq                                 | Desulfotomaculum nigrificans                    | 1430   | 14          | NCIMB 8395   | rRNA        |         |                                                                    | 1         | 1430    | TRUE    | ncbi_filtered | 1565    |
| NZ_K912183_271265_2713967      | 696369  | NZ_K912183     | Desulfotomaculum nigrificans DSM 574 DesinDRAFT_DNA.1, whole genome shotgun sequence           | 9-Apr-17      | 4-Jan-18      | 1       |     |        | WGS,IMPROVED_HIGH_QUALITY_DRAFT,RefSeq | Desulfotomaculum nigrificans DSM 574            | 1603   | 0           | DSM 574      | genomic DNA |         | fresh water                                                        | 271265    | 2713967 | TRUE    | ncbi_filtered | 1565    |
| AJ171351_1_1507                | 1575    | AJ171351       | Leifsonia xylii 16S rRNA gene, isolate CV86                                                    | 16-Jul-05     | 4-Jan-18      | 1       |     |        | RefSeq                                 | Leifsonia xylii                                 | 1507   | 0           |              | genomic DNA | CV86    | alkaline groundwater                                               | 1         | 1507    | FALSE   | ncbi_filtered | 1575    |
| JN208893_1_1385                | 1575    | JN208893       | Leifsonia xylii strain IPR-Pv515 16S ribosomal RNA gene, partial sequence                      | 5-Apr-12      | 4-Jan-18      | 1       |     |        | RefSeq                                 | Leifsonia xylii                                 | 1385   | 0           | IPR-Pv515    | genomic DNA |         |                                                                    | 1         | 1385    | FALSE   | ncbi_filtered | 1575    |
| KF241145_1_1485                | 1575    | KF241145       | Leifsonia xylii 16S ribosomal RNA gene, partial sequence                                       | 1-Jan-14      | 4-Jan-18      | 1       |     |        | RefSeq                                 | Leifsonia xylii                                 | 1485   | 0           | SC-2         | genomic DNA |         | stem                                                               | 1         | 1485    | FALSE   | ncbi_filtered | 1575    |
| KO38240_1_1227                 | 1575    | KO38240        | Leifsonia xylii strain PS32 16S ribosomal RNA gene, partial sequence                           | 31-Oct-16     | 4-Jan-18      | 1       |     |        | RefSeq                                 | Leifsonia xylii                                 | 1227   | 0           | PS32         | genomic DNA |         | Rhizosphere soil of King chilli                                    | 1         | 1227    | FALSE   | ncbi_filtered | 1575    |
| NC_022438_2472871_2474398      | 1389489 | NC_022438      | Leifsonia xylii subsp. cydodontis DSM 46306, complete genome                                   | 9-Apr-17      | 4-Jan-18      | 1       |     |        | RefSeq                                 | Leifsonia xylii subsp. cydodontis DSM 46306     | 1528   | 0           | DSM 46306    | genomic DNA |         |                                                                    | 2472871   | 2474398 | TRUE    | ncbi_filtered | 1575    |
| GU454852_1_1410                | 1579    | GU454852       | Lactobacillus acidophilus strain 821-2 16S ribosomal RNA gene, partial sequence                | 15-Nov-10     | 4-Jan-18      | 1       |     |        | RefSeq                                 | Lactobacillus acidophilus                       | 1410   | 0           | 821-2        | genomic DNA |         |                                                                    | 1         | 1410    | FALSE   | ncbi_filtered | 1579    |
| KJ558388_1_1368                | 1579    | KJ558388       | Lactobacillus acidophilus strain ZT-11 16S ribosomal RNA gene, partial sequence                | 22-Apr-14     | 4-Jan-18      | 1       |     |        | RefSeq                                 | Lactobacillus acidophilus                       | 1368   | 0           | ZT-11        | genomic DNA |         |                                                                    | 1         | 1368    | FALSE   | ncbi_filtered | 1579    |
| KT722160_1_1297                | 1579    | KT722160       | Lactobacillus acidophilus strain ZGP-Lac.18 16S ribosomal RNA gene, partial sequence           | 8-Sep-15      | 4-Jan-18      | 1       |     |        | RefSeq                                 | Lactobacillus acidophilus                       | 1297   | 0           | ZGP-Lac.18   | genomic DNA |         |                                                                    | 1         | 1297    | FALSE   | ncbi_filtered | 1579    |
| KT45881_1_1366                 | 1579    | KT45881        | Lactobacillus acidophilus strain MLB02 16S ribosomal RNA gene, partial sequence                | 6-Feb-16      | 4-Jan-18      | 1       |     |        | RefSeq                                 | Lactobacillus acidophilus                       | 1366   | 0           | MLB02        | genomic DNA |         | milk                                                               | 1         | 1366    | FALSE   | ncbi_filtered | 1579    |
| KU922757_1_1460                | 1579    | KU922757       | Lactobacillus acidophilus strain L2-16 16S ribosomal RNA gene, partial sequence                | 22-Oct-16     | 4-Jan-18      | 1       |     |        | RefSeq                                 | Lactobacillus acidophilus                       | 1460   | 0           | L2-16        | genomic DNA |         |                                                                    | 1         | 1460    | FALSE   | ncbi_filtered | 1579    |
| D16548_1_1521                  | 1582    | D16548         | Lactobacillus casei gene for 16S rRNA                                                          | 6-Jun-02      | 4-Jan-18      | 1       |     |        | RefSeq                                 | Lactobacillus casei                             | 1521   | 3           | JCM 1133     | genomic DNA |         |                                                                    | 1         | 1521    | FALSE   | ncbi_filtered | 1582    |
| JN560835_1_1446                | 1582    | JN560835       | Lactobacillus casei strain 06 16S ribosomal RNA gene, partial sequence                         | 31-Aug-11     | 4-Jan-18      | 1       |     |        | RefSeq                                 | Lactobacillus casei                             | 1446   | 0           | 6            | genomic DNA |         |                                                                    | 1         | 1446    | FALSE   | ncbi_filtered | 1582    |
| KM350163_1_1475                | 1582    | KM350163       | Lactobacillus casei strain LC1 16S ribosomal RNA gene, partial sequence                        | 11-Nov-14     | 4-Jan-18      | 1       |     |        | RefSeq                                 | Lactobacillus casei                             | 1475   | 0           | LC1          | genomic DNA |         | cheese                                                             | 1         | 1475    | FALSE   | ncbi_filtered | 1582    |
| KR612227_1_1451                | 1582    | KR612227       | Lactobacillus casei strain P5C6 16S ribosomal RNA gene, partial sequence                       | 15-Aug-15     | 4-Jan-18      | 1       |     |        | RefSeq                                 | Lactobacillus casei                             | 1451   | 0           | P5C6         | genomic DNA |         | soy curd                                                           | 1         | 1451    | FALSE   | ncbi_filtered | 1582    |
| KT124595_1_1464                | 1582    | KT124595       | Lactobacillus casei strain PT1318 16S ribosomal RNA gene, partial sequence                     | 13-Sep-15     | 4-Jan-18      | 1       |     |        | RefSeq                                 | Lactobacillus casei                             | 1464   | 0           | PT1318       | genomic DNA |         | vasteda-like cheese                                                | 1         | 1464    | FALSE   | ncbi_filtered | 1582    |
| HM218613_1_1448                | 1587    | HM218613       | Lactobacillus helveticus strain NM155-5 16S ribosomal RNA gene, partial sequence               | 20-Sep-10     | 4-Jan-18      | 1       |     |        | RefSeq                                 | Lactobacillus helveticus                        | 1448   | 1           | NM155-5      | genomic DNA |         | fermented dairy products                                           | 1         | 1448    | FALSE   | ncbi_filtered | 1587    |
| HMS81523_1_1476                | 1587    | HMS81523       | Lactobacillus helveticus strain K1/R0052 16S ribosomal RNA gene, partial sequence              | 24-Nov-10     | 4-Jan-18      | 1       |     |        | RefSeq                                 | Lactobacillus helveticus                        | 1476   | 0           | K1/R0052     | genomic DNA |         |                                                                    | 1         | 1476    | FALSE   | ncbi_filtered | 1587    |
| KM448565_1_1474                | 1587    | KM448565       | Lactobacillus helveticus strain MIM60419-1 16S ribosomal RNA gene, partial sequence            | 6-Oct-15      | 4-Jan-18      | 1       |     |        | RefSeq                                 | Lactobacillus helveticus                        | 1474   | 0           | MIM60419-1   | genomic DNA |         | food                                                               | 1         | 1474    | FALSE   | ncbi_filtered | 1587    |
| KX430837_1_1508                | 1587    | KX430837       | Lactobacillus helveticus strain GM2 16S ribosomal RNA gene, partial sequence                   | 27-Jun-16     | 4-Jan-18      | 1       |     |        | RefSeq                                 | Lactobacillus helveticus                        | 1508   | 0           | GM2          | genomic DNA |         | goat milk                                                          | 1         | 1508    | FALSE   | ncbi_filtered | 1587    |
| MG550986_1_1467                | 1587    | MG550986       | Lactobacillus helveticus strain NNAFU1327 16S ribosomal RNA gene, partial sequence             | 26-Nov-17     | 4-Jan-18      | 1       |     |        | RefSeq                                 | Lactobacillus helveticus                        | 1467   | 0           | NNAFU1327    | genomic DNA |         | naturally fermented yak milk                                       | 1         | 1467    | FALSE   | ncbi_filtered | 1587    |
| GU138567_1_1488                | 1590    | GU138567       | Lactobacillus plantarum strain IMAU10239 16S ribosomal RNA gene, partial sequence              | 15-Dec-09     | 4-Jan-18      | 1       |     |        | RefSeq                                 | Lactobacillus plantarum                         | 1488   | 0           | LSM44-2      | genomic DNA |         | starter doughs for Chinese steamed bread                           | 1         | 1488    | FALSE   | ncbi_filtered | 1590    |
| K0057499_1_1508                | 1590    | K0057499       | Lactobacillus plantarum strain a22 16S ribosomal RNA gene, partial sequence                    | 18-Dec-16     | 4-Jan-18      | 1       |     |        | RefSeq                                 | Lactobacillus plantarum                         | 1508   | 0           | a22          | genomic DNA |         | hudy                                                               | 1         | 1508    | FALSE   | ncbi_filtered | 1590    |
| K0057543_1_1511                | 1590    | K0057543       | Lactobacillus plantarum strain a62 16S ribosomal RNA gene, partial sequence                    | 18-Dec-16     | 4-Jan-18      | 1       |     |        | RefSeq                                 | Lactobacillus plantarum                         | 1511   | 0           | a62          | genomic DNA |         | hudy                                                               | 1         | 1511    | FALSE   | ncbi_filtered | 1590    |
| MG809194_1_1475                | 1590    | MG809194       | Lactobacillus plantarum strain 6-16S ribosomal RNA gene, partial sequence                      | 9-Feb-18      | 14-Feb-18     | 1       |     |        | RefSeq                                 | Lactobacillus plantarum                         | 1475   | 0           | 6-11         | genomic DNA |         | Fermented sowthistle                                               | 1         | 1475    | FALSE   | ncbi_filtered | 1590    |
| NC_014554_2918606_2920181      | 889932  | NC_014554      | Lactobacillus plantarum subsp. plantarum ST-III, complete genome                               | 22-Mar-17     | 4-Jan-18      | 1       |     |        | RefSeq                                 | Lactobacillus plantarum subsp. plantarum ST-III | 1576   | 0           | ST-III       | genomic DNA |         |                                                                    | 2918606   | 2920181 | FALSE   | ncbi_filtered | 1590    |
| AF243165_1_1522                | 1596    | AF243165       | Lactobacillus gasseri strain KCSa 16S ribosomal RNA gene, partial sequence                     | 7-Aug-02      | 4-Jan-18      | 1       |     |        | RefSeq                                 | Lactobacillus gasseri                           | 1522   | 0           | KCSa         | genomic DNA |         |                                                                    | 1         | 1522    | FALSE   | ncbi_filtered | 1596    |
| KF739067_1_1416                | 1596    | KF739067       | Lactobacillus gasseri strain B6 16S ribosomal RNA gene, partial sequence                       | 19-Jan-14     | 4-Jan-18      | 1       |     |        | RefSeq                                 | Lactobacillus gasseri                           | 1416   | 0           | B6           | genomic DNA |         | vaginal sample                                                     | 1         | 1416    | FALSE   | ncbi_filtered | 1596    |
| KP090118_1_1482                | 1596    | KP090118       | Lactobacillus gasseri strain LE93 16S ribosomal RNA gene, partial sequence                     | 30-Mar-15     | 4-Jan-18      | 1       |     |        | RefSeq                                 | Lactobacillus gasseri                           | 1482   | 0           | LE93         | genomic DNA |         | vaginal tract of healthy woman                                     | 1         | 1482    | FALSE   | ncbi_filtered | 1596    |
| KP090119_1_1482                | 1596    | KP090119       | Lactobacillus gasseri strain LE4 16S ribosomal RNA gene, partial sequence                      | 30-Mar-15     | 4-Jan-18      | 1       |     |        | RefSeq                                 | Lactobacillus gasseri                           | 1482   | 0           | LE4          | genomic DNA |         | vaginal tract of healthy woman                                     | 1         | 1482    | FALSE   | ncbi_filtered | 1596    |
| MS8820_1_1521                  | 1596    | MS8820         | Lactobacillus gasseri 16S ribosomal RNA                                                        | 27-Apr-93     | 4-Jan-18      | 1       |     |        | RefSeq                                 | Lactobacillus gasseri                           | 1521   | 10          |              | rRNA        |         | Rice wine, Takju                                                   | 1         | 1521    | FALSE   | ncbi_filtered | 1596    |
| AB368899_1_1481                | 1597    | AB368899       | Lactobacillus paracasei gene for 16S rRNA, partial sequence, strain: T2-2                      | 19-Nov-09     | 4-Jan-18      | 1       |     |        | RefSeq                                 | Lactobacillus paracasei                         | 1481   | 0           | T2-2         | genomic DNA |         |                                                                    | 1         | 1481    | FALSE   | ncbi_filtered | 1597    |
| AB795644_1_1452                | 1597    | AB795644       | Lactobacillus paracasei gene for 16S ribosomal RNA, partial sequence, strain: 183              | 7-Mar-13      | 4-Jan-18      | 1       |     |        | RefSeq                                 | Lactobacillus paracasei                         | 1452   | 0           | q1181        | genomic DNA |         | life rubbish soil                                                  | 1         | 1452    | FALSE   | ncbi_filtered | 1597    |
| AY773952_1_1450                | 1597    | AY773952       | Lactobacillus paracasei isolate 2C 16S ribosomal RNA gene, complete sequence                   | 20-Dec-06     | 4-Jan-18      | 1       |     |        | RefSeq                                 | Lactobacillus paracasei                         | 1450   | 0           |              | genomic DNA | 2C      |                                                                    | 1         | 1450    | FALSE   | ncbi_filtered | 1597    |
| KC836720_1_1398                | 1597    | KC836720       | Lactobacillus paracasei strain RU39-2 16S ribosomal RNA gene, partial sequence                 | 27-May-13     | 4-Jan-18      | 1       |     |        | RefSeq                                 | Lactobacillus paracasei                         | 1398   | 0           | RU39-2       | genomic DNA |         |                                                                    | 1         | 1398    | FALSE   | ncbi_filtered | 1597    |
| NZ_CP013921_1589584_1591162    | 1597    | NZ_CP013921    | Lactobacillus paracasei strain KL1, complete genome                                            | 5-Apr-17      | 4-Jan-18      | 1       |     |        | RefSeq                                 | Lactobacillus paracasei                         | 1579   | 0           | KL1          | genomic DNA |         | milk                                                               | 1589584   | 1591162 | FALSE   | ncbi_filtered | 1597    |
| EU381122_1_1433                | 1598    | EU381122       | Lactobacillus reuteri strain Is21 16S ribosomal RNA gene, partial sequence                     | 2-Feb-08      | 4-Jan-18      | 1       |     |        | RefSeq                                 | Lactobacillus reuteri                           | 1433   | 0           | b21          | genomic DNA |         | feces of ICR mouse                                                 | 1         | 1433    | FALSE   | ncbi_filtered | 1598    |
| KY930476_1_1476                | 1598    | KY930476       | Lactobacillus reuteri strain FD3 16S ribosomal RNA gene, partial sequence                      | 11-Nov-17     | 4-Jan-18      | 1       |     |        | RefSeq                                 | Lactobacillus reuteri                           | 1476   | 0           | FD3          | genomic DNA |         |                                                                    | 1         | 1476    | FALSE   | nc            |         |

| seqname                     | tax_id  | accession      | description                                                                          | modified_date | download_date | version_num | source                               | keywords                           | organism                             | length | ambig_count | strain     | mol_type    | isolate | isolation_source                                 | seq_start | seq_stop | is_type | collection    | species |
|-----------------------------|---------|----------------|--------------------------------------------------------------------------------------|---------------|---------------|-------------|--------------------------------------|------------------------------------|--------------------------------------|--------|-------------|------------|-------------|---------|--------------------------------------------------|-----------|----------|---------|---------------|---------|
| KX68171_1_1427              | 1604    | KX68171        | Lactobacillus amylovorus strain 05-3A07 16S ribosomal RNA gene, partial sequence     | 30-Oct-17     | 4-Jan-18      | 1           | Lactobacillus amylovorus             |                                    | Lactobacillus amylovorus             | 1427   | 0           | 05-3A07    | genomic DNA |         | feces                                            | 1         | 1427     | FALSE   | ncbi_filtered | 1604    |
| AB859011_1_1508             | 1613    | AB859011       | Lactobacillus fermentum gene for 16S ribosomal RNA, partial sequence, strain: P8CC11 | 23-Oct-13     | 4-Jan-18      | 1           | Lactobacillus fermentum              |                                    | Lactobacillus fermentum              | 1508   | 0           | P8CC11     | genomic DNA |         | sourdough                                        | 1         | 1508     | FALSE   | ncbi_filtered | 1613    |
| JQ084644_1_1471             | 1613    | JQ084644       | Lactobacillus fermentum strain LAB-10 16S ribosomal RNA gene, partial sequence       | 30-Jan-12     | 4-Jan-18      | 1           | Lactobacillus fermentum              |                                    | Lactobacillus fermentum              | 1471   | 0           | LAB-10     | genomic DNA |         |                                                  | 1         | 1471     | FALSE   | ncbi_filtered | 1613    |
| KF060259_1_1515             | 1613    | KF060259       | Lactobacillus fermentum strain FMAC283 16S ribosomal RNA gene, partial sequence      | 1-Jul-13      | 4-Jan-18      | 1           | Lactobacillus fermentum              |                                    | Lactobacillus fermentum              | 1515   | 0           | FMAC283    | genomic DNA |         | traditional caciocavallo palermitano type cheese | 1         | 1515     | FALSE   | ncbi_filtered | 1613    |
| MF139038_1_1466             | 1613    | MF139038       | Lactobacillus fermentum strain SC_4 16S ribosomal RNA gene, partial sequence         | 27-May-17     | 4-Jan-18      | 1           | Lactobacillus fermentum              |                                    | Lactobacillus fermentum              | 1466   | 0           | SC_4       | genomic DNA |         |                                                  | 1         | 1466     | FALSE   | ncbi_filtered | 1613    |
| MF139039_1_1475             | 1613    | MF139039       | Lactobacillus fermentum strain SC_14 16S ribosomal RNA gene, partial sequence        | 27-May-17     | 4-Jan-18      | 1           | Lactobacillus fermentum              |                                    | Lactobacillus fermentum              | 1475   | 0           | SC_14      | genomic DNA |         |                                                  | 1         | 1475     | FALSE   | ncbi_filtered | 1613    |
| JQ805628_1_1427             | 1623    | JQ805628       | Lactobacillus ruminis strain IMAUF8008 16S ribosomal RNA gene, partial sequence      | 7-May-12      | 4-Jan-18      | 1           | Lactobacillus ruminis                |                                    | Lactobacillus ruminis                | 1475   | 0           | IMAUF8008  | genomic DNA |         | feces                                            | 1         | 1475     | FALSE   | ncbi_filtered | 1623    |
| JQ805632_1_1584             | 1623    | JQ805632       | Lactobacillus ruminis strain IMAUF8012 16S ribosomal RNA gene, partial sequence      | 6-Nov-15      | 4-Jan-18      | 2           | Lactobacillus ruminis                |                                    | Lactobacillus ruminis                | 1584   | 0           | IMAUF8012  | genomic DNA |         | feces                                            | 1         | 1584     | FALSE   | ncbi_filtered | 1623    |
| JQ805642_1_1579             | 1623    | JQ805642       | Lactobacillus ruminis strain IMAUF8022 16S ribosomal RNA gene, partial sequence      | 6-Nov-15      | 4-Jan-18      | 2           | Lactobacillus ruminis                |                                    | Lactobacillus ruminis                | 1579   | 0           | IMAUF8022  | genomic DNA |         | feces                                            | 1         | 1579     | FALSE   | ncbi_filtered | 1623    |
| K7221545_1_1409             | 1623    | K7221545       | Lactobacillus ruminis strain 15.6 16S ribosomal RNA gene, partial sequence           | 29-Nov-15     | 4-Jan-18      | 1           | Lactobacillus ruminis                |                                    | Lactobacillus ruminis                | 1409   | 0           | 15.6       | genomic DNA |         | human stool                                      | 1         | 1409     | FALSE   | ncbi_filtered | 1623    |
| NC_015975_1507392_1508963   | 1069534 | NC_015975      | Lactobacillus ruminis ATCC 27782, complete genome                                    | 10-Apr-17     | 4-Jan-18      | 1           | Lactobacillus ruminis ATCC 27782     | RefSeq                             | Lactobacillus ruminis ATCC 27782     | 1572   | 0           | ATCC 27782 | genomic DNA |         |                                                  | 1507392   | 1508963  | FALSE   | ncbi_filtered | 1623    |
| AB175733_1_1463             | 1624    | AB175733       | Lactobacillus salivarius gene for 16S rRNA, strain:LSA8                              | 3-Apr-07      | 4-Jan-18      | 1           | Lactobacillus salivarius             |                                    | Lactobacillus salivarius             | 1461   | 2           | LSA8       | genomic DNA |         |                                                  | 1         | 1461     | FALSE   | ncbi_filtered | 1624    |
| AB731447_1_1451             | 1624    | AB731447       | Lactobacillus salivarius gene for 16S rRNA, partial sequence, strain: AA13           | 22-Jul-12     | 4-Jan-18      | 1           | Lactobacillus salivarius             |                                    | Lactobacillus salivarius             | 1453   | 0           | AA13       | genomic DNA |         | oral cavity of desert animals (foxes)            | 1         | 1453     | FALSE   | ncbi_filtered | 1624    |
| AB911536_1_1502             | 1624    | AB911536       | Lactobacillus salivarius gene for 16S rRNA, partial sequence, strain: JCM 8699       | 26-Feb-14     | 4-Jan-18      | 1           | Lactobacillus salivarius             |                                    | Lactobacillus salivarius             | 1502   | 3           | JCM 8699   | genomic DNA |         |                                                  | 1         | 1502     | FALSE   | ncbi_filtered | 1624    |
| KC561125_1_1502             | 1624    | KC561125       | Lactobacillus salivarius strain Es2 16S ribosomal RNA gene, partial sequence         | 16-Feb-13     | 4-Jan-18      | 1           | Lactobacillus salivarius             |                                    | Lactobacillus salivarius             | 1502   | 0           | Es2        | genomic DNA |         | intestinal sample of Iranian native chicken      | 1         | 1502     | FALSE   | ncbi_filtered | 1624    |
| K0014907_1_1544             | 1624    | K0014907       | Lactobacillus salivarius strain KLB242 16S ribosomal RNA gene, partial sequence      | 22-May-16     | 4-Jan-18      | 1           | Lactobacillus salivarius             |                                    | Lactobacillus salivarius             | 1544   | 0           | KLB242     | genomic DNA |         |                                                  | 1         | 1544     | FALSE   | ncbi_filtered | 1624    |
| AY957475_1_1489             | 1652    | AY957475       | Alloicoccus otitis 16S ribosomal RNA gene, partial sequence                          | 30-Mar-05     | 4-Jan-18      | 1           | Alloicoccus otitis                   |                                    | Alloicoccus otitis                   | 1489   | 0           |            | genomic DNA |         | 1 year old child with otitis perforata           | 1         | 1489     | FALSE   | ncbi_filtered | 1652    |
| NR_026088_1_1525            | 1652    | NR_026088      | Alloicoccus otitis strain NCFB 2890 16S ribosomal RNA gene, partial sequence         | 3-Feb-15      | 4-Jan-18      | 1           | Alloicoccus otitis                   | RefSeq;16S ribosomal RNA homologue | Alloicoccus otitis                   | 1525   | 5           | NCFB 2890  | rRNA        |         |                                                  | 1         | 1525     | TRUE    | ncbi_filtered | 1652    |
| NR_113771_1_1474            | 1652    | NR_113771      | Alloicoccus otitis strain NBR8 15545 16S ribosomal RNA gene, partial sequence        | 3-Feb-15      | 4-Jan-18      | 1           | Alloicoccus otitis                   | RefSeq                             | Alloicoccus otitis                   | 1474   | 5           | NBR8 15545 | rRNA        |         |                                                  | 1         | 1474     | TRUE    | ncbi_filtered | 1652    |
| NZ_JH992958_483505_485063   | 883081  | NZ_JH992958    | Alloicoccus otitis ATCC 51267 supercont1.2, whole genome shotgun sequence            | 17-Apr-17     | 4-Jan-18      | 1           | Alloicoccus otitis ATCC 51267        | WGS;HIGH_QUALITY_DRAFT;RefSeq      | Alloicoccus otitis ATCC 51267        | 1559   | 0           | ATCC 51267 | genomic DNA |         |                                                  | 483505    | 485063   | TRUE    | ncbi_filtered | 1652    |
| NZ_JH992962_112579_114137   | 883081  | NZ_JH992962    | Alloicoccus otitis ATCC 51267 supercont1.6, whole genome shotgun sequence            | 17-Apr-17     | 4-Jan-18      | 1           | Alloicoccus otitis ATCC 51267        | WGS;HIGH_QUALITY_DRAFT;RefSeq      | Alloicoccus otitis ATCC 51267        | 1559   | 0           | ATCC 51267 | genomic DNA |         |                                                  | 112579    | 114137   | TRUE    | ncbi_filtered | 1652    |
| AI63359_1_1533              | 1655    | AI63359        | Actinomyces naeslundii 16S rRNA gene                                                 | 11-Jul-05     | 4-Jan-18      | 1           | Actinomyces naeslundii               |                                    | Actinomyces naeslundii               | 1533   | 1           |            | genomic DNA |         | alkaline groundwater                             | 1         | 1533     | FALSE   | ncbi_filtered | 1655    |
| JF803528_1_1394             | 1655    | JF803528       | Actinomyces naeslundii strain M166 16S ribosomal RNA gene, partial sequence          | 8-May-11      | 4-Jan-18      | 1           | Actinomyces naeslundii               |                                    | Actinomyces naeslundii               | 1394   | 0           | M166       | genomic DNA |         | cystic fibrosis sputum                           | 1         | 1394     | FALSE   | ncbi_filtered | 1655    |
| NZ_MSLA0100015_65300_66869  | 1655    | NZ_MSLA0100015 | Actinomyces naeslundii strain R13240                                                 | 6-Apr-17      | 4-Jan-18      | 1           | Actinomyces naeslundii               | WGS;RefSeq                         | Actinomyces naeslundii               | 1570   | 0           | R13240     | genomic DNA |         | subphrenic abscess                               | 65300     | 66869    | FALSE   | ncbi_filtered | 1655    |
| NZ_MSR0100009_36785_38354   | 1655    | NZ_MSR0100009  | Actinomyces naeslundii strain S44D 544D_contig009, whole genome shotgun sequence     | 6-Apr-17      | 4-Jan-18      | 1           | Actinomyces naeslundii               | WGS;RefSeq                         | Actinomyces naeslundii               | 1570   | 0           | S44D       | genomic DNA |         | Plaque (aries -)                                 | 36785     | 38354    | FALSE   | ncbi_filtered | 1655    |
| PKKX0100004_222198_223748   | 1655    | PKKX0100004    | Actinomyces naeslundii strain UMB0731_21837_8_63_4, whole genome shotgun sequence    | 28-Dec-17     | 4-Jan-18      | 1           | Actinomyces naeslundii               | WGS                                | Actinomyces naeslundii               | 1551   | 0           | UMB0731    | genomic DNA |         |                                                  | 222198    | 223748   | FALSE   | ncbi_filtered | 1655    |
| AB621359_1_1505             | 1656    | AB621359       | Actinomyces viscosus gene for 16S ribosomal RNA, partial sequence, strain: JCM 8352  | 9-Nov-12      | 4-Jan-18      | 1           | Actinomyces viscosus                 |                                    | Actinomyces viscosus                 | 1505   | 0           | JCM 8352   | genomic DNA |         |                                                  | 1         | 1505     | FALSE   | ncbi_filtered | 1656    |
| AJ234046_1_1445             | 1656    | AJ234046       | Actinomyces viscosus 16S rRNA gene, strain CCGU 33710                                | 30-Jan-01     | 4-Jan-18      | 1           | Actinomyces viscosus                 | 16S ribosomal RNA;16S rRNA         | Actinomyces viscosus                 | 1445   | 10          | CCGU 33710 | genomic DNA |         |                                                  | 1         | 1445     | FALSE   | ncbi_filtered | 1656    |
| AJ234053_1_1371             | 1656    | AJ234053       | Actinomyces viscosus 16S rRNA gene, strain CCGU 34288                                | 30-Jan-01     | 4-Jan-18      | 1           | Actinomyces viscosus                 | 16S ribosomal RNA;16S rRNA         | Actinomyces viscosus                 | 1371   | 7           | CCGU 34288 | genomic DNA |         |                                                  | 1         | 1371     | FALSE   | ncbi_filtered | 1656    |
| AJ234056_1_1445             | 1656    | AJ234056       | Actinomyces viscosus 16S rRNA gene, strain CCGU 35332                                | 30-Jan-01     | 4-Jan-18      | 1           | Actinomyces viscosus                 | 16S ribosomal RNA;16S rRNA         | Actinomyces viscosus                 | 1445   | 3           | CCGU 35332 | genomic DNA |         |                                                  | 1         | 1445     | FALSE   | ncbi_filtered | 1656    |
| LC037217_1_1502             | 1656    | LC037217       | Actinomyces viscosus gene for 16S ribosomal RNA, partial sequence, strain: DSM 8351  | 25-Mar-15     | 4-Jan-18      | 1           | Actinomyces viscosus                 |                                    | Actinomyces viscosus                 | 1502   | 0           | JCM 8351   | genomic DNA |         |                                                  | 1         | 1502     | FALSE   | ncbi_filtered | 1656    |
| AF479270_1_1446             | 1659    | AF479270       | Actinomyces israelii strain A1 16S ribosomal RNA gene, partial sequence              | 6-Mar-02      | 4-Jan-18      | 1           | Actinomyces israelii                 |                                    | Actinomyces israelii                 | 1446   | 0           | A1         | genomic DNA |         |                                                  | 1         | 1446     | FALSE   | ncbi_filtered | 1659    |
| KF932789_1_1508             | 1659    | KF932789       | Actinomyces israelii strain CHDC 8632 16S ribosomal RNA gene, partial sequence       | 12-Jun-15     | 4-Jan-18      | 1           | Actinomyces israelii                 |                                    | Actinomyces israelii                 | 1508   | 0           | CHDC 8632  | genomic DNA |         | oral cavity                                      | 1         | 1508     | FALSE   | ncbi_filtered | 1659    |
| NR_026227_1_1411            | 1659    | NR_026227      | Actinomyces israelii strain CIP 103259 16S ribosomal RNA, partial sequence           | 24-Oct-17     | 4-Jan-18      | 1           | Actinomyces israelii                 | RefSeq;ribosomal RNA               | Actinomyces israelii                 | 1441   | 2           | CIP 103259 | rRNA        |         |                                                  | 1         | 1441     | TRUE    | ncbi_filtered | 1659    |
| NR_114401_1_1542            | 1659    | NR_114401      | Actinomyces israelii strain JCM 12964 16S ribosomal RNA gene, partial sequence       | 3-Feb-15      | 4-Jan-18      | 1           | Actinomyces israelii                 | RefSeq                             | Actinomyces israelii                 | 1512   | 0           | JCM 12964  | rRNA        |         |                                                  | 1         | 1512     | TRUE    | ncbi_filtered | 1659    |
| AJ234041_1_1397             | 1660    | AJ234041       | Actinomyces odontolyticus 16S rRNA gene, strain CCGU 28084                           | 17-Feb-00     | 4-Jan-18      | 1           | Actinomyces odontolyticus            | 16S ribosomal RNA;16S rRNA         | Actinomyces odontolyticus            | 1397   | 2           | CCGU 28084 | genomic DNA |         |                                                  | 1         | 1397     | FALSE   | ncbi_filtered | 1660    |
| AJ234043_1_1392             | 1660    | AJ234043       | Actinomyces odontolyticus 16S rRNA gene, strain CCGU 32897                           | 30-Jan-01     | 4-Jan-18      | 1           | Actinomyces odontolyticus            | 16S ribosomal RNA;16S rRNA         | Actinomyces odontolyticus            | 1392   | 6           | CCGU 32897 | genomic DNA |         |                                                  | 1         | 1392     | FALSE   | ncbi_filtered | 1660    |
| GQ131411_1_1514             | 1660    | GQ131411       | Actinomyces odontolyticus strain F0309 16S ribosomal RNA gene, partial sequence      | 20-Sep-10     | 4-Jan-18      | 1           | Actinomyces odontolyticus            |                                    | Actinomyces odontolyticus            | 1514   | 0           | F0309      | genomic DNA |         |                                                  | 1         | 1514     | FALSE   | ncbi_filtered | 1660    |
| NZ_DS264586_1771944_1773497 | 414166  | NZ_DS264586    | Actinomyces odontolyticus ATCC 17982 Scfd021, whole genome shotgun sequence          | 7-Apr-17      | 4-Jan-18      | 1           | Actinomyces odontolyticus ATCC 17982 | WGS;RefSeq                         | Actinomyces odontolyticus ATCC 17982 | 1554   | 0           | ATCC 17982 | genomic DNA |         | biological product [ENVO:02000043]               | 1771944   | 1773497  | FALSE   | ncbi_filtered | 1660    |
| NZ_GG753639_96916_98468     | 649742  | NZ_GG753639    | Actinomyces odontolyticus F0309 Scfd0, whole genome shotgun sequence                 | 7-Apr-17      | 4-Jan-18      | 1           | Actinomyces odontolyticus F0309      | WGS;RefSeq                         | Actinomyces odontolyticus F0309      | 1553   | 0           | F0309      | genomic DNA |         | biological product [ENVO:02000043]               | 96916     | 98468    | FALSE   | ncbi_filtered | 1660    |
| EJ221365_1_1443             | 1665    | EJ221365       | Arthro bacter globiformis strain B255 16S ribosomal RNA gene, partial sequence       | 2-Feb-09      | 4-Jan-18      | 1           | Arthro bacter globiformis            |                                    | Arthro bacter globiformis            | 1443   | 0           | B255       | genomic DNA |         | wheat rhizosphere                                | 1         | 1443     | FALSE   | ncbi_filtered | 1665    |
| KC414683_1_1454             | 1665    | KC414683       | Arthro bacter globiformis strain KUCC1703 16S ribosomal RNA gene, partial sequence   | 13-Feb-13     | 4-Jan-18      | 1           | Arthro bacter globiformis            |                                    | Arthro bacter globiformis            | 1454   | 0           | KUCC1703   | genomic DNA |         | rhizosphere                                      | 1         | 1454     | FALSE   | ncbi_filtered | 1665    |
| KF387686_1_1385             | 1665    | KF387686       | Arthro bacter globiformis strain BCK2 16S ribosomal RNA gene, partial sequence       | 28-Aug-13     | 4-Jan-18      | 1           | Arthro bacter globiformis            |                                    | Arthro bacter globiformis            | 1385   | 0           | BCK2       | genomic DNA |         |                                                  | 1         | 1385     | FALSE   | ncbi_filtered | 1665    |
| KY753216_1_1424             | 1665    | KY753216       | Arthro bacter globiformis strain MR-17 16S ribosomal RNA gene, partial sequence      | 19-Jun-17     | 4-Jan-18      | 1           | Arthro bacter globiformis            |                                    | Arthro bacter globiformis            | 1424   | 0           | MR-17      | genomic DNA |         | soil                                             | 1         | 1424     | FALSE   | ncbi_filtered | 1665    |
| KY753354_1_1397             | 1665    | KY753354       | Arthro bacter globiformis strain movR-1 16S ribosomal RNA gene, partial sequence     | 19-Jun-17     | 4-Jan-18      | 1           | Arthro bacter globiformis            |                                    | Arthro bacter globiformis            | 1397   | 0           | movR-1     | genomic DNA |         | plants from alpine grassland, 2970 m elevation   | 1         | 1397     | FALSE   | ncbi_filtered | 1665    |
| FJ263367_1_1432             | 1671    | FJ263367       | Arthro bacter ovoidans strain RC28 16S ribosomal RNA gene, partial sequence          | 26-Oct-08     | 4-Jan-18      | 1           | Pseudarthro bacter ovoidans          |                                    | Pseudarthro bacter ovoidans          | 1432   | 0           | RC28       | genomic DNA |         |                                                  | 1         | 1432     | FALSE   | ncbi_filtered | 1671    |
| FM955886_1_1525             | 1671    | FM955886       | Arthro bacter ovoidans 16S rRNA gene, strain Asd MS-7                                | 20-Jan-09     | 4-Jan-18      | 1           | Pseudarthro bacter ovoidans          |                                    | Pseudarthro bacter ovoidans          | 1525   | 0           | Asd MS-7   | genomic DNA |         | soft and sandy sediment sample                   | 1         | 1525     | FALSE   | ncbi_filtered | 1671    |
| JF496255_1_1392             | 1671    | JF496255       | Arthro bacter ovoidans strain XA1-5 16S ribosomal RNA gene, partial sequence         | 19-Aug-11     | 4-Jan-18      | 1           | Pseudarthro bacter ovoidans          |                                    | Pseudarthro bacter ovoidans          | 1392   | 0           | XA1-5      | genomic DNA |         | soil crust                                       | 1         | 1392     | FALSE   | ncbi_filtered | 1671    |
| JF496497_1_1387             | 1671    | JF496497       | Arthro bacter ovoidans strain WA6-9 16S ribosomal RNA gene, partial sequence         | 19-Aug-11     | 4-Jan-18      | 1           | Pseudarthro bacter ovoidans          |                                    | Pseudarthro bacter ovoidans          | 1387   | 0           | WA6-9      | genomic DNA |         | soil crust                                       | 1         | 1387     | FALSE   | ncbi_filtered | 1671    |
| KR085845_1_1469             | 1671    | KR085845       | Arthro bacter ovoidans strain IHBB 11072 16S ribosomal RNA gene, partial sequence    | 11-Aug-15     | 4-Jan-18      | 1           | Pseudarthro bacter ovoidans          |                                    | Pseudarthro bacter ovoidans          | 1469   | 0           | IHBB 11072 | genomic DNA |         | Chandra Tal Lake Water                           | 1         | 1469     | FALSE   | ncbi_filtered | 1671    |
| KJ705017_1_1485             | 1680    | KJ705017       | Bifidobacterium adolescentis strain VB-ES42 16S ribosomal RNA gene, partial sequence | 15-Mar-17     | 4-Jan-18      | 1           | Bifidobacterium adolescentis         |                                    | Bifidobacterium adolescentis         | 148    |             |            |             |         |                                                  |           |          |         |               |         |

| seqname                        | tax_id  | accession        | description                                                                                  | modified_date | download_date | version_num | source                                        | keywords                        | organism                              | length | ambig_count | strain                  | mol_type    | isolate | isolation_source                                | seq_start | seq_stop | is_top | collection    | species |
|--------------------------------|---------|------------------|----------------------------------------------------------------------------------------------|---------------|---------------|-------------|-----------------------------------------------|---------------------------------|---------------------------------------|--------|-------------|-------------------------|-------------|---------|-------------------------------------------------|-----------|----------|--------|---------------|---------|
| NR_029262_1_1482               | 1698    | NR_029262        | Brevibacterium epidermidis strain P159 16S ribosomal RNA gene, partial sequence              | 3-Feb-15      | 4-Jan-18      | 1           | Brevibacterium epidermidis                    | RefSeq                          | Brevibacterium epidermidis            | 1482   | 1           | P159; CCLG 30540        | rRNA        |         |                                                 | 1         | 1482     | TRUE   | ncbi_filtered | 1698    |
| NZ_BCSJ01000023_304_1837       | 1349751 | NZ_BCSJ01000023  | Brevibacterium epidermidis NBRC 14811, whole genome shotgun sequence                         | 16-Apr-17     | 4-Jan-18      | 1           | Brevibacterium epidermidis NBRC 14811         | WGS;STANDARD_DRAFT;RefSeq       | Brevibacterium epidermidis NBRC 14811 | 1534   | 0           | NBRC 14811              | genomic DNA |         |                                                 | 304       | 1837     | TRUE   | ncbi_filtered | 1698    |
| KY346501_1_1368                | 1717    | KY346501         | Corynebacterium diphtheriae strain Cdp1 16S ribosomal RNA gene, partial sequence             | 19-Dec-16     | 4-Jan-18      | 1           | Corynebacterium diphtheriae                   |                                 | Corynebacterium diphtheriae           | 1368   | 2           | Cdp1                    | genomic DNA |         |                                                 | 1         | 1368     | FALSE  | ncbi_filtered | 1717    |
| KY346503_1_1368                | 1717    | KY346503         | Corynebacterium diphtheriae strain Cdp3 16S ribosomal RNA gene, partial sequence             | 19-Dec-16     | 4-Jan-18      | 1           | Corynebacterium diphtheriae                   |                                 | Corynebacterium diphtheriae           | 1368   | 12          | Cdp3                    | genomic DNA |         |                                                 | 1         | 1368     | FALSE  | ncbi_filtered | 1717    |
| LT960553_1_1530                | 1717    | LT960553         | Corynebacterium diphtheriae partial 16S rRNA gene, strain FRC0043                            | 22-Oct-17     | 4-Jan-18      | 1           | Corynebacterium diphtheriae                   |                                 | Corynebacterium diphtheriae           | 1530   | 0           | FRC0043                 | genomic DNA |         |                                                 | 1         | 1530     | FALSE  | ncbi_filtered | 1717    |
| NZ_MKYH01000020_448_1858       | 1717    | NZ_MKYH01000020  | Corynebacterium diphtheriae strain r2379 contig00020, whole genome shotgun sequence          | 3-Aug-17      | 4-Jan-18      | 1           | Corynebacterium diphtheriae                   | WGS;RefSeq                      | Corynebacterium diphtheriae           | 1411   | 0           | r2379                   | genomic DNA |         | throat swab                                     | 448       | 1858     | FALSE  | ncbi_filtered | 1717    |
| NZ_MKY0101000003_237803_239336 | 1717    | NZ_MKY0101000003 | Corynebacterium diphtheriae strain r2358 contig00003, whole genome shotgun sequence          | 3-Aug-17      | 4-Jan-18      | 1           | Corynebacterium diphtheriae                   | WGS;RefSeq                      | Corynebacterium diphtheriae           | 1514   | 0           | r2358                   | genomic DNA |         | throat swab                                     | 237803    | 239336   | FALSE  | ncbi_filtered | 1717    |
| FM213373_1_1404                | 1725    | FM213373         | Corynebacterium xerosis partial 16S rRNA gene, strain s94845                                 | 8-Sep-10      | 4-Jan-18      | 4           | Corynebacterium xerosis                       |                                 | Corynebacterium xerosis               | 1404   | 0           | S649845                 | genomic DNA |         |                                                 | 1         | 1404     | FALSE  | ncbi_filtered | 1725    |
| KF171710_1_1362                | 1725    | KF171710         | Corynebacterium xerosis strain NS1 16S ribosomal RNA gene, partial sequence                  | 8-Jul-13      | 4-Jan-18      | 1           | Corynebacterium xerosis                       |                                 | Corynebacterium xerosis               | 1362   | 1           | NS1                     | genomic DNA |         | skin                                            | 1         | 1362     | FALSE  | ncbi_filtered | 1725    |
| KU252652_1_1450                | 1725    | KU252652         | Corynebacterium xerosis strain J23 16S ribosomal RNA gene, partial sequence                  | 11-Oct-16     | 4-Jan-18      | 1           | Corynebacterium xerosis                       |                                 | Corynebacterium xerosis               | 1450   | 0           | J23                     | genomic DNA |         | raw milk                                        | 1         | 1450     | FALSE  | ncbi_filtered | 1725    |
| KU252662_1_1432                | 1725    | KU252662         | Corynebacterium xerosis strain N1 16S ribosomal RNA gene, partial sequence                   | 11-Oct-16     | 4-Jan-18      | 1           | Corynebacterium xerosis                       |                                 | Corynebacterium xerosis               | 1432   | 0           | N1                      | genomic DNA |         | raw milk                                        | 1         | 1432     | FALSE  | ncbi_filtered | 1725    |
| KU315398_1_1439                | 1725    | KU315398         | Corynebacterium xerosis strain Ln2 16S ribosomal RNA gene, partial sequence                  | 14-May-16     | 4-Jan-18      | 1           | Corynebacterium xerosis                       |                                 | Corynebacterium xerosis               | 1439   | 1           | Ln2                     | genomic DNA |         | chicken manure                                  | 1         | 1439     | FALSE  | ncbi_filtered | 1725    |
| NR_044731_1_1487               | 1735    | NR_044731        | Holdemanelia biformis strain DSM 3989 16S ribosomal RNA, partial sequence                    | 24-Oct-17     | 4-Jan-18      | 2           | Holdemanelia biformis                         | RefSeq                          | Holdemanelia biformis                 | 1487   | 13          | DSM 3989                | rRNA        |         |                                                 | 1         | 1487     | TRUE   | ncbi_filtered | 1735    |
| NZ_D5996836_3656_5203          | 518637  | NZ_D5996836      | Holdemanelia biformis DSM 3989 Sctf00, whole genome shotgun sequence                         | 17-Apr-17     | 4-Jan-18      | 1           | Holdemanelia biformis DSM 3989                | WGS;RefSeq                      | Holdemanelia biformis DSM 3989        | 1548   | 0           | DSM 3989                | genomic DNA |         | biological product [ENVO:02000043]              | 3656      | 5203     | TRUE   | ncbi_filtered | 1735    |
| LC011042_1_1385                | 1737    | LC011042         | [Eubacterium] tenue gene for 16S ribosomal RNA, partial sequence, strain: JCM 6486           | 22-Nov-14     | 4-Jan-18      | 1           | [Eubacterium] tenue                           |                                 | [Eubacterium] tenue                   | 1388   | 0           | JCM 6486                | genomic DNA |         |                                                 | 1         | 1388     | TRUE   | ncbi_filtered | 1737    |
| NR_104812_1_1498               | 1737    | NR_104812        | [Eubacterium] tenue strain DSM 20695 16S ribosomal RNA gene, partial sequence                | 3-Feb-15      | 4-Jan-18      | 1           | [Eubacterium] tenue                           | RefSeq                          | [Eubacterium] tenue                   | 1495   | 0           | DSM 20695               | rRNA        |         |                                                 | 1         | 1495     | TRUE   | ncbi_filtered | 1737    |
| NR_115796_1_1248               | 1737    | NR_115796        | [Eubacterium] tenue strain ATCC 25553 16S ribosomal RNA gene, partial sequence               | 3-Feb-15      | 4-Jan-18      | 1           | [Eubacterium] tenue                           | RefSeq                          | [Eubacterium] tenue                   | 1248   | 0           | ATCC 25553              | rRNA        |         |                                                 | 1         | 1248     | TRUE   | ncbi_filtered | 1737    |
| NR_117174_1_1492               | 1737    | NR_117174        | [Eubacterium] tenue strain DSM 20695 16S ribosomal RNA gene, partial sequence                | 3-Feb-15      | 4-Jan-18      | 1           | [Eubacterium] tenue                           | RefSeq                          | [Eubacterium] tenue                   | 1492   | 0           | DSM 20695               | rRNA        |         |                                                 | 1         | 1492     | TRUE   | ncbi_filtered | 1737    |
| NR_118732_1_1361               | 1737    | NR_118732        | [Eubacterium] tenue strain ATCC 25553 16S ribosomal RNA, partial sequence                    | 23-Oct-17     | 4-Jan-18      | 2           | [Eubacterium] tenue                           | RefSeq                          | [Eubacterium] tenue                   | 1361   | 3           | ATCC 25553              | rRNA        |         |                                                 | 1         | 1361     | TRUE   | ncbi_filtered | 1737    |
| AB097215_1_1526                | 1747    | AB097215         | Propionibacterium acnes gene for 16S ribosomal RNA, complete sequence                        | 3-Dec-02      | 4-Jan-18      | 1           | Cutibacterium acnes (Propionibacterium acnes) |                                 | Cutibacterium acnes                   | 1526   | 1           | IFM10239                | genomic DNA |         |                                                 | 1         | 1526     | FALSE  | ncbi_filtered | 1747    |
| F1957858_1_1464                | 1747    | F1957858         | Propionibacterium acnes strain JPL_3 16S ribosomal RNA gene, partial sequence                | 26-Apr-10     | 4-Jan-18      | 1           | Cutibacterium acnes (Propionibacterium acnes) |                                 | Cutibacterium acnes                   | 1464   | 1           | JPL_3                   | genomic DNA |         |                                                 | 1         | 1464     | FALSE  | ncbi_filtered | 1747    |
| JF430008_1_1246                | 1747    | JF430008         | Propionibacterium acnes strain 1508-10 16S ribosomal RNA gene, partial sequence              | 2-May-11      | 4-Jan-18      | 1           | Cutibacterium acnes (Propionibacterium acnes) |                                 | Cutibacterium acnes                   | 1246   | 0           | 1508-10                 | genomic DNA |         | conjunctival scraping                           | 1         | 1246     | FALSE  | ncbi_filtered | 1747    |
| KM099490_1_1521                | 1747    | KM099490         | Propionibacterium acnes strain A45-1 16S ribosomal RNA gene, partial sequence                | 8-Oct-14      | 4-Jan-18      | 1           | Cutibacterium acnes (Propionibacterium acnes) |                                 | Cutibacterium acnes                   | 1521   | 0           | A45-1                   | genomic DNA |         | Acne vulgaris                                   | 1         | 1521     | FALSE  | ncbi_filtered | 1747    |
| KY674895_1_1207                | 1734925 | KY674895         | Propionibacterium acnes subsp. acnes strain HKG 307 16S ribosomal RNA gene, partial sequence | 15-Aug-17     | 4-Jan-18      | 1           | Cutibacterium acnes subsp. acnes              |                                 | Cutibacterium acnes subsp. acnes      | 1207   | 0           | HKG 307                 | genomic DNA |         | skin lesion of acne patient                     | 1         | 1207     | FALSE  | ncbi_filtered | 1747    |
| AA16941_1_1439                 | 1774    | AA16941          | Mycobacterium chelonae partial 16S rRNA gene, strain M8834                                   | 6-Jun-03      | 4-Jan-18      | 1           | Mycobacterium chelonae                        | 16S ribosomal RNA;16S rRNA gene | Mycobacterium chelonae                | 1439   | 1           | M8834                   | genomic DNA |         |                                                 | 1         | 1439     | FALSE  | ncbi_filtered | 1774    |
| AY457082_1_1481                | 1774    | AY457082         | Mycobacterium chelonae strain ATCC 19237 16S ribosomal RNA gene, partial sequence            | 17-Sep-13     | 4-Jan-18      | 1           | Mycobacterium chelonae                        |                                 | Mycobacterium chelonae                | 1481   | 0           | ATCC 19237              | genomic DNA |         |                                                 | 1         | 1481     | FALSE  | ncbi_filtered | 1774    |
| K779812_1_1384                 | 1774    | K779812          | Mycobacterium chelonae strain D16Q16 16S ribosomal RNA gene, partial sequence                | 8-Mar-16      | 4-Jan-18      | 1           | Mycobacterium chelonae                        |                                 | Mycobacterium chelonae                | 1384   | 0           | D16Q16                  | genomic DNA |         | water work                                      | 1         | 1384     | FALSE  | ncbi_filtered | 1774    |
| K779813_1_1384                 | 1774    | K779813          | Mycobacterium chelonae strain D16Q15 16S ribosomal RNA gene, partial sequence                | 8-Mar-16      | 4-Jan-18      | 1           | Mycobacterium chelonae                        |                                 | Mycobacterium chelonae                | 1384   | 0           | D16Q15                  | genomic DNA |         | tap water                                       | 1         | 1384     | FALSE  | ncbi_filtered | 1774    |
| NZ_CP007220_1429567_1431089    | 1460372 | NZ_CP007220      | Mycobacterium chelonae CCLG 47445, complete genome                                           | 5-Apr-17      | 4-Jan-18      | 1           | Mycobacterium chelonae CCLG 47445             | RefSeq                          | Mycobacterium chelonae CCLG 47445     | 1523   | 0           | CCLG 47445              | genomic DNA |         |                                                 | 1429567   | 1431089  | TRUE   | ncbi_filtered | 1774    |
| AJ581472_1_1425                | 1778    | AJ581472         | Mycobacterium goodii partial 16S rRNA gene, strain agh3                                      | 2-Mar-06      | 4-Jan-18      | 1           | Mycobacterium goodii                          | 16S ribosomal RNA;16S rRNA gene | Mycobacterium goodii                  | 1525   | 0           | agh3                    | genomic DNA |         |                                                 | 1         | 1525     | FALSE  | ncbi_filtered | 1778    |
| GU142923_1_1491                | 1778    | GU142923         | Mycobacterium goodii strain M138 16S ribosomal RNA gene, partial sequence                    | 18-Oct-11     | 4-Jan-18      | 1           | Mycobacterium goodii                          |                                 | Mycobacterium goodii                  | 1491   | 0           | M138                    | genomic DNA |         | urine                                           | 1         | 1491     | FALSE  | ncbi_filtered | 1778    |
| HE575951_1_1448                | 1778    | HE575951         | Mycobacterium goodii partial 16S rRNA gene, strain 16.2 AW                                   | 1-Jun-12      | 4-Jan-18      | 1           | Mycobacterium goodii                          |                                 | Mycobacterium goodii                  | 1448   | 0           | 16.2 AW                 | genomic DNA |         | water preparation basis for metalworking fluids | 1         | 1448     | FALSE  | ncbi_filtered | 1778    |
| HE575965_1_1386                | 1778    | HE575965         | Mycobacterium goodii partial 16S rRNA gene, strain 18-20.6 AW                                | 1-Jun-12      | 4-Jan-18      | 1           | Mycobacterium goodii                          |                                 | Mycobacterium goodii                  | 1386   | 0           | 18-20.6 AW              | genomic DNA |         | water preparation basis for metalworking fluids | 1         | 1386     | FALSE  | ncbi_filtered | 1778    |
| NZ_LKTM01000253_13845_15386    | 1778    | NZ_LKTM01000253  | Mycobacterium goodii strain CTRI 14-8773 contig_62, whole genome shotgun sequence            | 11-Apr-17     | 4-Jan-18      | 1           | Mycobacterium goodii                          | WGS;RefSeq                      | Mycobacterium goodii                  | 1542   | 0           | CTRI 14-8773            | genomic DNA |         | sputum of patient with mycobacteriosis          | 13845     | 15386    | FALSE  | ncbi_filtered | 1778    |
| M29556_1_1368                  | 1790    | M29556           | Mycobacterium asiaticum strain ATCC 25276 16S ribosomal RNA                                  | 24-Jun-93     | 4-Jan-18      | 1           | Mycobacterium asiaticum                       | 16S ribosomal RNA               | Mycobacterium asiaticum               | 1368   | 13          |                         | rRNA        |         |                                                 | 1         | 1368     | FALSE  | ncbi_filtered | 1790    |
| NR_118917_1_1468               | 1790    | NR_118917        | Mycobacterium asiaticum strain ATCC 25276 16S ribosomal RNA gene, partial sequence           | 3-Feb-15      | 4-Jan-18      | 1           | Mycobacterium asiaticum                       | RefSeq                          | Mycobacterium asiaticum               | 1468   | 0           | ATCC 25276              | rRNA        |         |                                                 | 1         | 1468     | TRUE   | ncbi_filtered | 1790    |
| NZ_HG964937_283256_284799      | 1265310 | NZ_HG964937      | Mycobacterium asiaticum DSM 44297, whole genome shotgun sequence                             | 22-Oct-17     | 4-Jan-18      | 1           | Mycobacterium asiaticum DSM 44297             | WGS;RefSeq                      | Mycobacterium asiaticum DSM 44297     | 1544   | 0           | DSM 44297               | genomic DNA |         |                                                 | 283256    | 284799   | TRUE   | ncbi_filtered | 1790    |
| NZ_LZLQ01000124_161750_163290  | 1790    | NZ_LZLQ01000124  | Mycobacterium asiaticum strain 1245139.5 contig_71, whole genome shotgun sequence            | 5-Apr-17      | 4-Jan-18      | 1           | Mycobacterium asiaticum                       | WGS;RefSeq                      | Mycobacterium asiaticum               | 1541   | 0           | 1245139.5               | genomic DNA |         |                                                 | 161750    | 163290   | FALSE  | ncbi_filtered | 1790    |
| NZ_LZLQ01000244_30407_31950    | 1790    | NZ_LZLQ01000244  | Mycobacterium asiaticum strain 1245335.1 contig_95, whole genome shotgun sequence            | 5-Apr-17      | 4-Jan-18      | 1           | Mycobacterium asiaticum                       | WGS;RefSeq                      | Mycobacterium asiaticum               | 1544   | 0           | 1245335.1               | genomic DNA |         |                                                 | 30407     | 31950    | FALSE  | ncbi_filtered | 1790    |
| AB177887_1_1512                | 1833    | AB177887         | Rhodococcus erythropolis strain:TUT582                                                       | 8-Oct-05      | 4-Jan-18      | 1           | Rhodococcus erythropolis                      |                                 | Rhodococcus erythropolis              | 1512   | 0           | TUT582                  | genomic DNA |         |                                                 | 1         | 1512     | FALSE  | ncbi_filtered | 1833    |
| AB612122_1_1301                | 1833    | AB612122         | Rhodococcus erythropolis gene for 16S rRNA, partial sequence                                 | 4-Feb-11      | 4-Jan-18      | 1           | Rhodococcus erythropolis                      |                                 | Rhodococcus erythropolis              | 1301   | 0           | SK-1                    | genomic DNA |         |                                                 | 1         | 1301     | FALSE  | ncbi_filtered | 1833    |
| EU481631_1_1418                | 1833    | EU481631         | Rhodococcus erythropolis strain DSQ4 16S ribosomal RNA gene, partial sequence                | 11-Mar-08     | 4-Jan-18      | 1           | Rhodococcus erythropolis                      |                                 | Rhodococcus erythropolis              | 1418   | 0           | DSQ4                    | genomic DNA |         |                                                 | 1         | 1418     | FALSE  | ncbi_filtered | 1833    |
| KY293331_1_1389                | 1833    | KY293331         | Rhodococcus erythropolis strain IN119 16S ribosomal RNA gene, partial sequence               | 25-Oct-15     | 4-Jan-18      | 1           | Rhodococcus erythropolis                      |                                 | Rhodococcus erythropolis              | 1389   | 2           | IN119                   | genomic DNA |         | hydrocarbon-contaminated soil                   | 1         | 1389     | FALSE  | ncbi_filtered | 1833    |
| NZ_CP011295_4221777_4223299    | 1833    | NZ_CP011295      | Rhodococcus erythropolis strain BG43, complete genome                                        | 3-Apr-17      | 4-Jan-18      | 1           | Rhodococcus erythropolis                      | RefSeq                          | Rhodococcus erythropolis              | 1523   | 10          | BG43                    | genomic DNA |         | soil                                            | 4221777   | 4223299  | FALSE  | ncbi_filtered | 1833    |
| NC_017093_4544012_4545534      | 512565  | NC_017093        | Actinoplanes missouriensis 431 DNA, complete genome                                          | 17-Apr-17     | 4-Jan-18      | 1           | Actinoplanes missouriensis 431                | RefSeq                          | Actinoplanes missouriensis 431        | 1523   | 0           | 431                     | genomic DNA |         |                                                 | 4544012   | 4545534  | TRUE   | ncbi_filtered | 1866    |
| NC_017093_495134_496655        | 512565  | NC_017093        | Actinoplanes missouriensis 431 DNA, complete genome                                          | 17-Apr-17     | 4-Jan-18      | 1           | Actinoplanes missouriensis 431                | RefSeq                          | Actinoplanes missouriensis 431        | 1522   | 0           | 431                     | genomic DNA |         |                                                 | 495134    | 496655   | TRUE   | ncbi_filtered | 1866    |
| NR_042015_1_1484               | 1866    | NR_042015        | Actinoplanes missouriensis strain IM5NJ 22051 16S ribosomal RNA gene, partial sequence       | 3-Feb-15      | 4-Jan-18      | 1           | Actinoplanes missouriensis                    | RefSeq                          | Actinoplanes missouriensis            | 1484   | 0           | IM5NJ 22051             | rRNA        |         |                                                 | 1         | 1484     | TRUE   | ncbi_filtered | 1866    |
| AJ494865_1_1519                | 1887    | AJ494865         | Streptomyces albobrevius partial 16S rRNA gene, type strain NRRL B-1305T                     | 13-Jan-06     | 4-Jan-18      | 1           | Streptomyces albobrevius                      | 16S ribosomal RNA;16S rRNA gene | Streptomyces albobrevius              | 1519   | 0           | NRRL B-1305 = DSM 40003 | genomic DNA |         |                                                 | 1         | 1519     | FALSE  | ncbi_filtered | 1887    |
| EU841557_1_1441                | 1887    | EU841557         | Streptomyces albobrevius strain HBU183454 16S ribosomal RNA gene, partial sequence           | 27-Jul-08     | 4-Jan-18      | 1           | Streptomyces albobrevius                      |                                 | Streptomyces albobrevius              | 1441   | 0           | HBU183454               | genomic DNA |         |                                                 | 1         | 1441     | FALSE  | ncbi_filtered | 1887    |
| FJ486338_1_1443                | 1887    | FJ486338         | Streptomyces albobrevius strain HBU174069 16S ribosomal RNA gene, partial sequence           | 15-Dec-08     | 4-Jan-18      | 1           | Streptomyces albobrevius                      |                                 | Streptomyces albobrevius              | 1443   | 0           | HBU174069               | genomic DNA |         |                                                 | 1         | 1443     | FALSE  | ncbi_filtered | 1887    |
| GQ268024_1_1342                | 1887    | GQ268024         | Streptomyces albobrevius strain NBE40 16S ribosomal RNA gene, partial sequence               | 31-Jul-15     | 4-Jan-18      |             |                                               |                                 |                                       |        |             |                         |             |         |                                                 |           |          |        |               |         |

| seqname                      | tax_id  | accession       | description                                                                                         | modified_date | download_date | version_num | source                                            | keywords                      | organism                                          | length | ambig_count | strain                 | mol_type       | isolate | isolation_source                                           | seq_start | seq_stop | is_top | collection        | species |
|------------------------------|---------|-----------------|-----------------------------------------------------------------------------------------------------|---------------|---------------|-------------|---------------------------------------------------|-------------------------------|---------------------------------------------------|--------|-------------|------------------------|----------------|---------|------------------------------------------------------------|-----------|----------|--------|-------------------|---------|
| NFD02000001_1497887_1499432  | 2052    | NFD02000001     | Mobiluncus mulleris strain FDAARGOS_303 scf718000000010_quiver_pilon, whole genome shotgun sequence | 19-Jan-18     | 22-Jan-18     | 1           | Mobiluncus mulleris                               | WGS                           | Mobiluncus mulleris                               | 1546   | 0           | FDARGOS_303            | genomic DNA    |         | Vaginal secretion from patient in Seattle, WA              | 1497887   | 1499432  | FALSE  | ncbi_filtered     | 2052    |
| NZ_ADBR01000053_3789_5337    | 596328  | NZ_ADBR01000053 | Mobiluncus mulleris 28-1 contig00018, whole genome shotgun sequence                                 | 7-Apr-17      | 4-Jan-18      | 1           | Mobiluncus mulleris 28-1                          | WGS,RefSeq                    | Mobiluncus mulleris 28-1                          | 1549   | 0           | 28-1                   | genomic DNA    |         | biological product [ENVO:02000043]                         | 3789      | 5337     | FALSE  | ncbi_filtered     | 2052    |
| AF397061_1_1478              | 2055    | AF397061        | Gordonia terrae AB111113 16S ribosomal RNA gene, partial sequence                                   | 18-Nov-09     | 4-Jan-18      | 1           | Gordonia terrae                                   |                               | Gordonia terrae                                   | 1478   | 0           | AB111113               | genomic DNA    |         |                                                            | 1         | 1478     | FALSE  | ncbi_filtered     | 2055    |
| FJ959396_1_1395              | 2055    | FJ959396        | Gordonia terrae strain MR6527 16S ribosomal RNA gene, partial sequence                              | 8-Jun-09      | 4-Jan-18      | 1           | Gordonia terrae                                   |                               | Gordonia terrae                                   | 1395   | 0           | MR6527                 | genomic DNA    |         |                                                            | 1         | 1395     | FALSE  | ncbi_filtered     | 2055    |
| K0078081_1_1348              | 2055    | K0078081        | Gordonia terrae strain LP80127 16S ribosomal RNA gene, partial sequence                             | 24-May-16     | 4-Jan-18      | 1           | Gordonia terrae                                   |                               | Gordonia terrae                                   | 1348   | 0           | LP80127                | genomic DNA    |         |                                                            | 1         | 1348     | FALSE  | ncbi_filtered     | 2055    |
| KX530784_1_1462              | 2055    | KX530784        | Gordonia terrae strain RTAE45 16S ribosomal RNA gene, partial sequence                              | 17-Jul-16     | 4-Jan-18      | 1           | Gordonia terrae                                   |                               | Gordonia terrae                                   | 1462   | 0           | RTAE45                 | genomic DNA    |         | wheat roots                                                | 1         | 1462     | FALSE  | ncbi_filtered     | 2055    |
| NR_119121_1_1319             | 2055    | NR_119121       | Gordonia terrae strain ATCC 25594 16S ribosomal RNA, partial sequence                               | 24-Oct-17     | 4-Jan-18      | 1           | Gordonia terrae                                   | RefSeq                        | Gordonia terrae                                   | 1319   | 3           | ATCC 25594             | rRNA           |         |                                                            | 1         | 1319     | TRUE   | ncbi_filtered     | 2055    |
| NC_013523_579557_581066      | 479434  | NC_013523       | Sphaerobacter thermophilus DSM 20745 chromosome 1, complete sequence                                | 17-Apr-17     | 4-Jan-18      | 1           | Sphaerobacter thermophilus DSM 20745              | RefSeq                        | Sphaerobacter thermophilus DSM 20745              | 1510   | 0           | DSM 20745              | genomic DNA    |         |                                                            | 579557    | 581066   | TRUE   | ncbi_filtered     | 2057    |
| NC_013524_554473_555981      | 479434  | NC_013524       | Sphaerobacter thermophilus DSM 20745 chromosome 2, complete sequence                                | 17-Apr-17     | 4-Jan-18      | 1           | Sphaerobacter thermophilus DSM 20745              | RefSeq                        | Sphaerobacter thermophilus DSM 20745              | 1509   | 0           | DSM 20745              | genomic DNA    |         |                                                            | 554473    | 555981   | TRUE   | ncbi_filtered     | 2057    |
| NR_042118_1_1500             | 2057    | NR_042118       | Sphaerobacter thermophilus strain DSM 20745 16S ribosomal RNA, partial sequence                     | 24-Oct-17     | 4-Jan-18      | 1           | Sphaerobacter thermophilus                        | RefSeq                        | Sphaerobacter thermophilus                        | 1500   | 0           | DSM 20745              | rRNA           |         |                                                            | 1         | 1500     | TRUE   | ncbi_filtered     | 2057    |
| NC_000908_170001_171538      | 243273  | NC_000908       | Mycoplasma genitalium G37, complete genome                                                          | 7-Apr-17      | 4-Jan-18      | 2           | Mycoplasma genitalium G37                         | RefSeq                        | Mycoplasma genitalium G37                         | 1539   | 0           | G-37                   | genomic DNA    |         |                                                            | 170001    | 171538   | TRUE   | ncbi_filtered     | 2097    |
| NC_018495_109999_171407      | 662938  | NC_018495       | Mycoplasma genitalium M2321, complete genome                                                        | 7-Apr-17      | 4-Jan-18      | 1           | Mycoplasma genitalium M2321                       | RefSeq                        | Mycoplasma genitalium M2321                       | 1539   | 0           | M2321                  | genomic DNA    |         |                                                            | 109999    | 171407   | FALSE  | ncbi_filtered     | 2097    |
| NC_018496_169673_171211      | 662946  | NC_018496       | Mycoplasma genitalium M6282, complete genome                                                        | 7-Apr-17      | 4-Jan-18      | 1           | Mycoplasma genitalium M6282                       | RefSeq                        | Mycoplasma genitalium M6282                       | 1539   | 0           | M6282                  | genomic DNA    |         |                                                            | 169673    | 171211   | FALSE  | ncbi_filtered     | 2097    |
| NC_018497_169844_171382      | 662945  | NC_018497       | Mycoplasma genitalium M6320, complete genome                                                        | 7-Apr-17      | 4-Jan-18      | 1           | Mycoplasma genitalium M6320                       | RefSeq                        | Mycoplasma genitalium M6320                       | 1539   | 0           | M6320                  | genomic DNA    |         |                                                            | 169844    | 171382   | FALSE  | ncbi_filtered     | 2097    |
| A002625_245_1857             | 347256  | A002625         | Mycoplasma hominis 16S rRNA, rrmB operon, strain PG21                                               | 11-Aug-98     | 4-Jan-18      | 1           | Mycoplasma hominis ATCC 23114                     |                               | Mycoplasma hominis ATCC 23114                     | 1613   | 0           | PG21                   | genomic DNA    |         |                                                            | 245       | 1857     | TRUE   | ncbi_filtered     | 2098    |
| CP02641_360939_362459        | 2098    | CP02641         | Mycoplasma hominis isolate 2539 chromosome, complete genome                                         | 31-Jan-18     | 14-Feb-18     | 1           | Mycoplasma hominis                                |                               | Mycoplasma hominis                                | 1521   | 0           |                        | genomic DNA    |         | 2539                                                       | 360939    | 362459   | FALSE  | ncbi_filtered     | 2098    |
| NC_013511_380267_381796      | 347256  | NC_013511       | Mycoplasma hominis ATCC 23114 chromosome complete genome                                            | 30-Mar-17     | 4-Jan-18      | 1           | Mycoplasma hominis ATCC 23114                     | RefSeq,complete genome        | Mycoplasma hominis ATCC 23114                     | 1530   | 0           | ATCC 23114             | genomic DNA    |         |                                                            | 380267    | 381796   | TRUE   | ncbi_filtered     | 2098    |
| NZ_CP009677_527893_529420    | 2098    | NZ_CP009677     | Mycoplasma hominis strain AF1, complete genome                                                      | 3-Apr-17      | 4-Jan-18      | 1           | Mycoplasma hominis                                | RefSeq                        | Mycoplasma hominis                                | 1528   | 0           | AF1                    | genomic DNA    |         | patients with intra-amniotic infection and premature labor | 527893    | 529420   | FALSE  | ncbi_filtered     | 2098    |
| NZ_IRWZ01000011_83_1610      | 2098    | NZ_IRWZ01000011 | Mycoplasma hominis strain AF3 contig00010, whole genome shotgun sequence                            | 3-Apr-17      | 4-Jan-18      | 1           | Mycoplasma hominis                                | WGS,RefSeq                    | Mycoplasma hominis                                | 1528   | 0           | AF3                    | genomic DNA    |         | patients with intra-amniotic infection and premature labor | 83        | 1610     | FALSE  | ncbi_filtered     | 2098    |
| NZ_AXZ01000001_108004_109535 | 1266997 | NZ_AXZ01000001  | Mycoplasma salivarium ATCC 23064 F8000RAFT_scaffold00001_1_C, whole genome shotgun sequence         | 17-Apr-17     | 4-Jan-18      | 1           | Mycoplasma salivarium ATCC 23064                  | WGS,RefSeq                    | Mycoplasma salivarium ATCC 23064                  | 1532   | 0           | ATCC 23064             | genomic DNA    |         |                                                            | 108004    | 109535   | TRUE   | ncbi_filtered     | 2124    |
| LB8642_1_1585                | 2130    | LB8642          | Ureaplasma urealyticum 16S ribosomal RNA                                                            | 25-Feb-94     | 4-Jan-18      | 1           | Ureaplasma urealyticum                            |                               | Ureaplasma urealyticum                            | 1585   | 0           | 27                     | unassigned DNA |         |                                                            | 1         | 1585     | FALSE  | ncbi_filtered     | 2130    |
| NC_011374_149403_150935      | 565575  | NC_011374       | Ureaplasma urealyticum serovar 10 str. ATCC 33699, complete genome                                  | 29-Mar-17     | 4-Jan-18      | 1           | Ureaplasma urealyticum serovar 10 str. ATCC 33699 | RefSeq                        | Ureaplasma urealyticum serovar 10 str. ATCC 33699 | 1533   | 0           | ATCC 33699             | genomic DNA    |         |                                                            | 149403    | 150935   | FALSE  | ncbi_filtered     | 2130    |
| NZ_AAZR01000004_76719_78232  | 561503  | NZ_AAZR01000004 | Ureaplasma urealyticum serovar 5 str. ATCC 27817 contig_110546453570, whole genome shotgun sequence | 15-Nov-17     | 4-Jan-18      | 1           | Ureaplasma urealyticum serovar 5 str. ATCC 27817  | WGS,RefSeq                    | Ureaplasma urealyticum serovar 5 str. ATCC 27817  | 1514   | 0           | ATCC 27817             | genomic DNA    |         |                                                            | 76719     | 78232    | FALSE  | ncbi_filtered     | 2130    |
| U06094_1_1439                | 2130    | U06094          | Ureaplasma urealyticum 7 (serovar 1) 16S ribosomal RNA gene                                         | 1-Jul-94      | 4-Jan-18      | 1           | Ureaplasma urealyticum                            |                               | Ureaplasma urealyticum                            | 1439   | 0           | 7 (serovar 1)          | unassigned DNA |         |                                                            | 1         | 1439     | FALSE  | ncbi_filtered     | 2130    |
| U06096_1_1434                | 2130    | U06096          | Ureaplasma urealyticum 23 (serovar 2) 16S ribosomal RNA gene                                        | 1-Jul-94      | 4-Jan-18      | 1           | Ureaplasma urealyticum                            |                               | Ureaplasma urealyticum                            | 1434   | 0           | 23 (serovar 2)         | unassigned DNA |         |                                                            | 1         | 1434     | FALSE  | ncbi_filtered     | 2130    |
| NZ_F0Y01000048_177_1628      | 1120918 | NZ_F0Y01000048  | Acetivomaculum ruminis DSM 5522, whole genome shotgun sequence                                      | 29-Jul-17     | 4-Jan-18      | 1           | Acetivomaculum ruminis DSM 5522                   | WGS,RefSeq                    | Acetivomaculum ruminis DSM 5522                   | 1452   | 0           | DSM 5522               | genomic DNA    |         |                                                            | 177       | 1628     | TRUE   | ncbi_filtered     | 2382    |
| ADE001000001_3969_5506       | 68953   | ADE001000001    | CG56v8475UC7816420Lctg6, whole genome shotgun sequence                                              | 21-May-12     | 4-Jan-18      | 1           | Gardnerella vaginalis 6420LIT                     | WGS                           | Gardnerella vaginalis 6420LIT                     | 1538   | 0           | 6420LIT                | genomic DNA    |         |                                                            | 3969      | 5506     | FALSE  | ncbi_filtered     | 2702    |
| JQ354973_1_1363              | 2702    | JQ354973        | Gardnerella vaginalis strain N153 16S ribosomal RNA gene, partial sequence                          | 5-Feb-13      | 4-Jan-18      | 1           | Gardnerella vaginalis                             |                               | Gardnerella vaginalis                             | 1363   | 0           | N153                   | genomic DNA    |         | vagina                                                     | 1         | 1363     | FALSE  | ncbi_filtered     | 2702    |
| JQ354976_1_1365              | 2702    | JQ354976        | Gardnerella vaginalis strain N165 16S ribosomal RNA gene, partial sequence                          | 5-Feb-13      | 4-Jan-18      | 1           | Gardnerella vaginalis                             |                               | Gardnerella vaginalis                             | 1365   | 0           | N165                   | genomic DNA    |         | vagina                                                     | 1         | 1365     | FALSE  | ncbi_filtered     | 2702    |
| JX860317_1_1391              | 2702    | JX860317        | Gardnerella vaginalis strain JCP8108 16S ribosomal RNA gene, partial sequence                       | 1-May-13      | 4-Jan-18      | 1           | Gardnerella vaginalis                             |                               | Gardnerella vaginalis                             | 1391   | 0           | JCP8108                | genomic DNA    |         | vaginal swab                                               | 1         | 1391     | FALSE  | ncbi_filtered     | 2702    |
| NZ_K0961867_123458_124993    | 2702    | NZ_K0961867     | Gardnerella vaginalis strain CMW7788 Scaffold85, whole genome shotgun sequence                      | 10-Apr-17     | 4-Jan-18      | 1           | Gardnerella vaginalis                             | WGS,HIGH_QUALITY_DRAFT,RefSeq | Gardnerella vaginalis                             | 1536   | 0           | CMW7788                | genomic DNA    |         | vagina                                                     | 123458    | 124993   | FALSE  | ncbi_filtered     | 2702    |
| KF007166_1_1354              | 2741    | KF007166        | Peptococcus sp. S9 B-15 16S ribosomal RNA gene, partial sequence                                    | 28-May-15     | 4-Jan-18      | 1           | Peptococcus sp. S9 B-15                           |                               | Peptococcus niger                                 | 1354   | 0           | S9 B-15                | genomic DNA    |         | vaginal swab                                               | 1         | 1354     | TRUE   | freddicks_isolate | 2741    |
| NR_029221_1_1393             | 2741    | NR_029221       | Peptococcus niger strain DSM 20475 16S ribosomal RNA gene, partial sequence                         | 3-Feb-15      | 4-Jan-18      | 1           | Peptococcus niger                                 | RefSeq                        | Peptococcus niger                                 | 1393   | 0           | DSM 20475              | rRNA           |         |                                                            | 1         | 1393     | TRUE   | ncbi_filtered     | 2741    |
| NR_113393_1_1528             | 2741    | NR_113393       | Peptococcus niger strain JCM 6506 16S ribosomal RNA gene, partial sequence                          | 3-Feb-15      | 4-Jan-18      | 1           | Peptococcus niger                                 | RefSeq                        | Peptococcus niger                                 | 1528   | 0           | JCM 6506               | rRNA           |         |                                                            | 1         | 1528     | TRUE   | ncbi_filtered     | 2741    |
| EJ730909_1_1388              | 13688   | EJ730909        | Novosphingobium capsulatum strain 172 16S ribosomal RNA gene, partial sequence                      | 10-Mar-09     | 4-Jan-18      | 1           | Novosphingobium capsulatum                        |                               | Novosphingobium capsulatum                        | 1388   | 1           | 172                    | genomic DNA    |         |                                                            | 1         | 1388     | FALSE  | ncbi_filtered     | 13688   |
| EJ730916_1_1384              | 13688   | EJ730916        | Novosphingobium capsulatum strain 213 16S ribosomal RNA gene, partial sequence                      | 10-Mar-09     | 4-Jan-18      | 1           | Novosphingobium capsulatum                        |                               | Novosphingobium capsulatum                        | 1384   | 0           | 213                    | genomic DNA    |         |                                                            | 1         | 1384     | FALSE  | ncbi_filtered     | 13688   |
| NR_025838_1_1443             | 13688   | NR_025838       | Novosphingobium capsulatum strain Gifu 11526 16S ribosomal RNA gene, partial sequence               | 3-Feb-15      | 4-Jan-18      | 1           | Novosphingobium capsulatum                        | RefSeq                        | Novosphingobium capsulatum                        | 1443   | 0           | Gifu 11526; ATCC 14666 | rRNA           |         |                                                            | 1         | 1443     | TRUE   | ncbi_filtered     | 13688   |
| NR_113591_1_1410             | 13688   | NR_113591       | Novosphingobium capsulatum strain NBRC 12533 16S ribosomal RNA gene, partial sequence               | 3-Feb-15      | 4-Jan-18      | 1           | Novosphingobium capsulatum                        | RefSeq                        | Novosphingobium capsulatum                        | 1410   | 0           | NBRC 12533             | rRNA           |         |                                                            | 1         | 1410     | TRUE   | ncbi_filtered     | 13688   |
| CP020925_3231421_3232916     | 13690   | CP020925        | Sphingobium yanoikuyae strain SHI, complete genome                                                  | 30-Oct-17     | 4-Jan-18      | 1           | Sphingobium yanoikuyae (Sphingomonas yanoikuyae)  |                               | Sphingobium yanoikuyae                            | 1496   | 0           | SHI                    | genomic DNA    |         | Soil                                                       | 3231421   | 3232916  | FALSE  | ncbi_filtered     | 13690   |
| QJ383896_1_1370              | 13690   | QJ383896        | Sphingobium yanoikuyae strain L11 16S ribosomal RNA gene, partial sequence                          | 1-Dec-15      | 4-Jan-18      | 1           | Sphingobium yanoikuyae (Sphingomonas yanoikuyae)  |                               | Sphingobium yanoikuyae                            | 1370   | 0           | L11                    | genomic DNA    |         | rhizosphere soil                                           | 1         | 1370     | FALSE  | ncbi_filtered     | 13690   |
| JF459932_1_1383              | 13690   | JF459932        | Sphingobium yanoikuyae strain W18R15 16S ribosomal RNA gene, partial sequence                       | 12-Mar-13     | 4-Jan-18      | 1           | Sphingobium yanoikuyae (Sphingomonas yanoikuyae)  |                               | Sphingobium yanoikuyae                            | 1383   | 0           | W18R15                 | genomic DNA    |         | water treatment plant - raw water                          | 1         | 1383     | FALSE  | ncbi_filtered     | 13690   |
| JF459945_1_1356              | 13690   | JF459945        | Sphingobium yanoikuyae strain T4CP8 16S ribosomal RNA gene, partial sequence                        | 12-Mar-13     | 4-Jan-18      | 1           | Sphingobium yanoikuyae (Sphingomonas yanoikuyae)  |                               | Sphingobium yanoikuyae                            | 1356   | 0           | T4CP8                  | genomic DNA    |         | tap water                                                  | 1         | 1356     | FALSE  | ncbi_filtered     | 13690   |
| KM871861_1_1387              | 13690   | KM871861        | Sphingobium yanoikuyae strain CH-1-2-1 16S ribosomal RNA gene, partial sequence                     | 31-Jan-15     | 4-Jan-18      | 1           | Sphingobium yanoikuyae (Sphingomonas yanoikuyae)  |                               | Sphingobium yanoikuyae                            | 1387   | 0           | CH-1-2-1               | genomic DNA    |         | digestive gland                                            | 1         | 1387     | FALSE  | ncbi_filtered     | 13690   |
| AB027536_1_1459              | 552531  | AB027536        | Bifidobacterium animalis gene for 16S rRNA                                                          | 8-Jan-00      | 4-Jan-18      | 1           | Bifidobacterium animalis subsp. lactis BB-12      |                               | Bifidobacterium animalis subsp. lactis BB-12      | 1459   | 1           | BB-12                  | genomic DNA    |         |                                                            | 1         | 1459     | FALSE  | ncbi_filtered     | 28025   |
| JN020357_1_1387              | 28025   | JN020357        | Bifidobacterium animalis strain A6 16S ribosomal RNA gene, partial sequence                         | 7-Jun-11      | 4-Jan-18      | 1           | Bifidobacterium animalis                          |                               | Bifidobacterium animalis                          | 1387   | 0           | A6                     | genomic DNA    |         | feces of healthy woman                                     | 1         | 1387     | FALSE  | ncbi_filtered     | 28025   |
| JN020359_1_1313              | 28025   | JN020359        | Bifidobacterium animalis strain I1 16S ribosomal RNA gene, partial sequence                         | 7-Jun-11      | 4-Jan-18      | 1           | Bifidobacterium animalis                          |                               | Bifidobacterium animalis                          | 1313   | 0           | I1                     | genomic DNA    |         | feces of healthy woman                                     | 1         | 1313     | FALSE  | ncbi_filtered     | 28025   |
| JD000251_1_1381              | 302912  | JD000251        | Bifidobacterium animalis subsp. animalis strain 3 I1 16S ribosomal RNA gene, partial sequence       | 4-Feb-12      | 4-Jan-18      | 1           | Bifidobacterium animalis subsp. animalis          |                               | Bifidobacterium animalis subsp. animalis          | 1381   | 0           | 3 I1                   | genomic DNA    |         | digestive tract                                            | 1         | 1381     | FALSE  | ncbi_filtered     | 28025   |
| MY092496_1_1374              | 28025   | MY092496        | Bifidobacterium animalis strain NBIF-3 16S ribosomal RNA gene, partial sequence                     | 7-Oct-14      | 4-Jan-18      | 1           | Bifidobacterium animalis                          |                               | Bifidobacterium animalis                          | 1374   | 0           | NBIF-3                 | genomic DNA    |         | adult feces                                                | 1         | 1374     | FALSE  | ncbi_filtered     | 28025   |
| AM93257_1_1475               | 28035   | AM93257         | Staphylococcus lugdunensis strain Inje L3 16S ribosomal RNA gene, partial sequence                  | 15-Feb-05     | 4-Jan-18      | 1           | Staphylococcus lugdunensis                        |                               | Staphylococcus lugdunensis                        | 1475   | 0           | Inje L3                | genomic DNA    |         |                                                            | 1         | 1475     | FALSE  | ncbi_filtered     | 28035   |
| CP020761_1160586_1162141     | 28035   | CP020761        | Staphylococcus lugdunensis strain VISLISI_37 genome                                                 | 1-May-17      | 4-Jan-18      | 1           |                                                   |                               |                                                   |        |             |                        |                |         |                                                            |           |          |        |                   |         |

| seqname                    | tax_id  | accession       | description                                                                                  | modified_date | download_date | version_num | source                                  | keywords                      | organism                                | length | ambig_count | strain              | mol_type    | isolate                                             | isolation_source | seq_start | seq_stop | is_type | collection    | species |
|----------------------------|---------|-----------------|----------------------------------------------------------------------------------------------|---------------|---------------|-------------|-----------------------------------------|-------------------------------|-----------------------------------------|--------|-------------|---------------------|-------------|-----------------------------------------------------|------------------|-----------|----------|---------|---------------|---------|
| FJ387578_1_1450            | 28092   | FJ387578        | Burkholderia andropogonis strain 1068 16S ribosomal RNA gene, partial sequence               | 29-Aug-12     | 4-Jan-18      | 1           | Robbia andropogonis                     |                               | Robbia andropogonis                     | 1450   | 0           | 1068                | genomic DNA |                                                     |                  | 1         | 1450     | FALSE   | ncbi_filtered | 28092   |
| FJ387581_1_1448            | 28092   | FJ387581        | Burkholderia andropogonis strain 6173 16S ribosomal RNA gene, partial sequence               | 29-Aug-12     | 4-Jan-18      | 1           | Robbia andropogonis                     |                               | Robbia andropogonis                     | 1448   | 0           | 6173                | genomic DNA |                                                     |                  | 1         | 1448     | FALSE   | ncbi_filtered | 28092   |
| FJ387587_1_1438            | 28092   | FJ387587        | Burkholderia andropogonis strain 6893 16S ribosomal RNA gene, partial sequence               | 29-Aug-12     | 4-Jan-18      | 1           | Robbia andropogonis                     |                               | Robbia andropogonis                     | 1438   | 0           | 6893                | genomic DNA |                                                     |                  | 1         | 1438     | FALSE   | ncbi_filtered | 28092   |
| FJ387588_1_1439            | 28092   | FJ387588        | Burkholderia andropogonis strain 7665 16S ribosomal RNA gene, partial sequence               | 29-Aug-12     | 4-Jan-18      | 1           | Robbia andropogonis                     |                               | Robbia andropogonis                     | 1439   | 0           | 7665                | genomic DNA |                                                     |                  | 1         | 1439     | FALSE   | ncbi_filtered | 28092   |
| D12789_1_1438              | 28101   | D12789          | Phyllobacterium myrsinacearum gene for 16S rRNA, strain: IAM 13584                           | 27-Sep-07     | 4-Jan-18      | 1           | Phyllobacterium myrsinacearum           |                               | Phyllobacterium myrsinacearum           | 1438   | 6           | IAM 13584           | genomic DNA |                                                     |                  | 1         | 1438     | FALSE   | ncbi_filtered | 28101   |
| D12790_1_1430              | 28101   | D12790          | Phyllobacterium myrsinacearum gene for 16S rRNA, strain: IAM 13587                           | 27-Sep-07     | 4-Jan-18      | 1           | Phyllobacterium myrsinacearum           |                               | Phyllobacterium myrsinacearum           | 1430   | 8           | IAM 13587           | genomic DNA |                                                     |                  | 1         | 1430     | FALSE   | ncbi_filtered | 28101   |
| EU169165_1_1363            | 28101   | EU169165        | Phyllobacterium myrsinacearum strain B65 16S ribosomal RNA gene, partial sequence            | 21-Oct-07     | 4-Jan-18      | 1           | Phyllobacterium myrsinacearum           |                               | Phyllobacterium myrsinacearum           | 1363   | 0           | B65                 | genomic DNA | rhizosphere soil of Bashania fangiana               |                  | 1         | 1363     | FALSE   | ncbi_filtered | 28101   |
| EU169173_1_1353            | 28101   | EU169173        | Phyllobacterium myrsinacearum strain B18 16S ribosomal RNA gene, partial sequence            | 21-Oct-07     | 4-Jan-18      | 1           | Phyllobacterium myrsinacearum           |                               | Phyllobacterium myrsinacearum           | 1353   | 0           | B18                 | genomic DNA | rhizosphere soil of Bashania fangiana               |                  | 1         | 1353     | FALSE   | ncbi_filtered | 28101   |
| PV01000014_536_2016        | 28101   | PV01000014      | Phyllobacterium myrsinacearum strain DSM 5892 ZB100013, whole genome shotgun sequence        | 7-Mar-18      | 14-Mar-18     | 1           | Phyllobacterium myrsinacearum           | WGS                           | Phyllobacterium myrsinacearum           | 1491   | 0           | DSM 5892            | genomic DNA |                                                     |                  | 526       | 2016     | TRUE    | ncbi_filtered | 28101   |
| AB053940_1_1486            | 28112   | AB053940        | Tannerella forsythia gene for 16S rRNA, strain: HA3                                          | 9-Nov-12      | 4-Jan-18      | 1           | Tannerella forsythia                    |                               | Tannerella forsythia                    | 1486   | 0           | HA3                 | genomic DNA |                                                     |                  | 1         | 1486     | FALSE   | ncbi_filtered | 28112   |
| DQ341410_1_1477            | 28112   | DQ341410        | Tannerella forsythens strain RMA 8563 16S ribosomal RNA gene, partial sequence               | 17-Jul-06     | 4-Jan-18      | 1           | Tannerella forsythia                    |                               | Tannerella forsythia                    | 1477   | 0           | RMA 8563            | genomic DNA | monkey                                              |                  | 1         | 1477     | FALSE   | ncbi_filtered | 28112   |
| NR_040839_1_1466           | 28112   | NR_040839       | Tannerella forsythia strain ATCC 43037 16S ribosomal RNA gene, partial sequence              | 3-Feb-15      | 4-Jan-18      | 1           | Tannerella forsythia                    | RefSeq                        | Tannerella forsythia                    | 1466   | 2           | ATCC 43037          | rRNA        |                                                     |                  | 1         | 1466     | TRUE    | ncbi_filtered | 28112   |
| NZ_AP013044_700709_702248  | 1307832 | NZ_AP013044     | Tannerella forsythia 3313 DNA, complete genome                                               | 4-Apr-17      | 4-Jan-18      | 1           | Tannerella forsythia 3313               | RefSeq                        | Tannerella forsythia 3313               | 1540   | 0           | 3313                | genomic DNA |                                                     |                  | 700709    | 702248   | FALSE   | ncbi_filtered | 28112   |
| NZ_MEH00100050_3901_5440   | 28112   | NZ_MEH00100050  | NODE_54_length_5875_cov_61.5743, whole genome shotgun sequence                               | 12-Jun-17     | 4-Jan-18      | 1           | Tannerella forsythia                    | WGS,RefSeq                    | Tannerella forsythia                    | 1540   | 0           | 9610                | genomic DNA | human oral cavity                                   |                  | 3901      | 5440     | FALSE   | ncbi_filtered | 28112   |
| AB686660_1_1490            | 28123   | AB686660        | Porphyromonas asaccharolytica gene for 16S ribosomal RNA, partial sequence, strain: JCM 6323 | 9-Nov-12      | 4-Jan-18      | 1           | Porphyromonas asaccharolytica           |                               | Porphyromonas asaccharolytica           | 1490   | 0           | JCM 6323            | genomic DNA |                                                     |                  | 1         | 1490     | FALSE   | ncbi_filtered | 28123   |
| NC_015501_135292_1353831   | 879243  | NC_015501       | Porphyromonas asaccharolytica DSM 20707, complete genome                                     | 7-Apr-17      | 4-Jan-18      | 1           | Porphyromonas asaccharolytica DSM 20707 | GSC,MIGS-2,RefSeq             | Porphyromonas asaccharolytica DSM 20707 | 1490   | 0           | DSM 20707           | genomic DNA | empyema                                             |                  | 1352292   | 1353831  | TRUE    | ncbi_filtered | 28123   |
| NR_044635_1_1478           | 28123   | NR_044635       | Porphyromonas asaccharolytica strain DSM 20707 16S ribosomal RNA, partial sequence           | 24-Oct-17     | 4-Jan-18      | 1           | Porphyromonas asaccharolytica           | RefSeq                        | Porphyromonas asaccharolytica           | 1478   | 8           | DSM 20707           | rRNA        |                                                     |                  | 1         | 1478     | TRUE    | ncbi_filtered | 28123   |
| L16491_1_1475              | 28124   | L16491          | Porphyromonas endodontalis ATCC 35406 16S ribosomal RNA gene, complete sequence              | 29-Jan-01     | 4-Jan-18      | 1           | Porphyromonas endodontalis              |                               | Porphyromonas endodontalis              | 1475   | 8           |                     | genomic DNA |                                                     |                  | 1         | 1475     | FALSE   | ncbi_filtered | 28124   |
| NZ_ACN01000001_1414_1955   | 553175  | NZ_ACN01000001  | Porphyromonas endodontalis ATCC 35406 contig0088, whole genome shotgun sequence              | 17-Apr-17     | 4-Jan-18      | 1           | Porphyromonas endodontalis ATCC 35406   | WGS,RefSeq                    | Porphyromonas endodontalis ATCC 35406   | 1542   | 0           | ATCC 35406          | genomic DNA | biological product [ENVO:02000043]                  |                  | 414       | 1955     | TRUE    | ncbi_filtered | 28124   |
| AB547674_1_1479            | 28125   | AB547674        | Prevotella bivia gene for 16S ribosomal RNA, partial sequence, strain: JCM 6332              | 9-Nov-12      | 4-Jan-18      | 1           | Prevotella bivia                        |                               | Prevotella bivia                        | 1479   | 0           | JCM 6332            | genomic DNA |                                                     |                  | 1         | 1479     | FALSE   | ncbi_filtered | 28125   |
| JN867273_1_1430            | 28125   | JN867273        | Prevotella bivia strain SEQ198 16S ribosomal RNA gene, partial sequence                      | 30-Mar-12     | 4-Jan-18      | 1           | Prevotella bivia                        |                               | Prevotella bivia                        | 1430   | 2           | SEQ198              | genomic DNA | human clinical isolate                              |                  | 1         | 1430     | FALSE   | ncbi_filtered | 28125   |
| JN867307_1_1408            | 28125   | JN867307        | Prevotella bivia strain SEQ234 16S ribosomal RNA gene, partial sequence                      | 30-Mar-12     | 4-Jan-18      | 1           | Prevotella bivia                        |                               | Prevotella bivia                        | 1408   | 1           | SEQ234              | genomic DNA | human clinical isolate                              |                  | 1         | 1408     | FALSE   | ncbi_filtered | 28125   |
| JN867318_1_1428            | 28125   | JN867318        | Prevotella bivia strain SEQ245 16S ribosomal RNA gene, partial sequence                      | 30-Mar-12     | 4-Jan-18      | 1           | Prevotella bivia                        |                               | Prevotella bivia                        | 1428   | 3           | SEQ245              | genomic DNA | human clinical isolate                              |                  | 1         | 1428     | FALSE   | ncbi_filtered | 28125   |
| NR_044629_1_1471           | 28125   | NR_044629       | Prevotella bivia strain ATCC 29303 16S ribosomal RNA, partial sequence                       | 24-Oct-17     | 4-Jan-18      | 1           | Prevotella bivia                        | RefSeq                        | Prevotella bivia                        | 1471   | 10          | ATCC 29303          | rRNA        |                                                     |                  | 1         | 1471     | TRUE    | ncbi_filtered | 28125   |
| JN867226_1_1334            | 28127   | JN867226        | Prevotella buccalis strain SEQ057 16S ribosomal RNA gene, partial sequence                   | 30-Mar-12     | 4-Jan-18      | 1           | Prevotella buccalis                     |                               | Prevotella buccalis                     | 1334   | 3           | SEQ057              | genomic DNA | human clinical isolate                              |                  | 1         | 1334     | FALSE   | ncbi_filtered | 28127   |
| JN867243_1_1335            | 28127   | JN867243        | Prevotella buccalis strain SEQ077 16S ribosomal RNA gene, partial sequence                   | 30-Mar-12     | 4-Jan-18      | 1           | Prevotella buccalis                     |                               | Prevotella buccalis                     | 1335   | 9           | SEQ077              | genomic DNA | human clinical isolate                              |                  | 1         | 1335     | FALSE   | ncbi_filtered | 28127   |
| JN867261_1_1433            | 28127   | JN867261        | Prevotella buccalis strain SEQ186 16S ribosomal RNA gene, partial sequence                   | 30-Mar-12     | 4-Jan-18      | 1           | Prevotella buccalis                     |                               | Prevotella buccalis                     | 1433   | 3           | SEQ186              | genomic DNA | human clinical isolate                              |                  | 1         | 1433     | FALSE   | ncbi_filtered | 28127   |
| NR_113098_1_1409           | 28127   | NR_113098       | Prevotella buccalis strain JCM 12246 16S ribosomal RNA gene, partial sequence                | 3-Feb-15      | 4-Jan-18      | 1           | Prevotella buccalis                     | RefSeq                        | Prevotella buccalis                     | 1493   | 0           | JCM 12246           | rRNA        |                                                     |                  | 1         | 1493     | TRUE    | ncbi_filtered | 28127   |
| NZ_JRNP01000093_4_1538     | 1401078 | NZ_JRNP01000093 | Prevotella buccalis DNF00985 contig093, whole genome shotgun sequence                        | 9-Apr-17      | 4-Jan-18      | 1           | Prevotella buccalis DNF00985            | WGS,HIGH_QUALITY_DRAFT,RefSeq | Prevotella buccalis DNF00985            | 1538   | 0           | DNF00985            | genomic DNA | vagina                                              |                  | 4         | 1538     | FALSE   | ncbi_filtered | 28127   |
| JN867252_1_1410            | 28128   | JN867252        | Prevotella corporis strain SEQ176 16S ribosomal RNA gene, partial sequence                   | 30-Mar-12     | 4-Jan-18      | 1           | Prevotella corporis                     |                               | Prevotella corporis                     | 1410   | 3           | SEQ176              | genomic DNA | human clinical isolate                              |                  | 1         | 1410     | FALSE   | ncbi_filtered | 28128   |
| JN867255_1_1409            | 28128   | JN867255        | Prevotella corporis strain SEQ179 16S ribosomal RNA gene, partial sequence                   | 30-Mar-12     | 4-Jan-18      | 1           | Prevotella corporis                     |                               | Prevotella corporis                     | 1409   | 0           | SEQ179              | genomic DNA | human clinical isolate                              |                  | 1         | 1409     | FALSE   | ncbi_filtered | 28128   |
| JN867271_1_1429            | 28128   | JN867271        | Prevotella corporis strain SEQ196 16S ribosomal RNA gene, partial sequence                   | 30-Mar-12     | 4-Jan-18      | 1           | Prevotella corporis                     |                               | Prevotella corporis                     | 1429   | 5           | SEQ196              | genomic DNA | human clinical isolate                              |                  | 1         | 1429     | FALSE   | ncbi_filtered | 28128   |
| NR_044627_1_1473           | 28128   | NR_044627       | Prevotella corporis strain Lambe 532-70A 16S ribosomal RNA, partial sequence                 | 24-Oct-17     | 4-Jan-18      | 1           | Prevotella corporis                     | RefSeq                        | Prevotella corporis                     | 1473   | 8           | Lambe 532-70A       | rRNA        |                                                     |                  | 1         | 1473     | TRUE    | ncbi_filtered | 28128   |
| NR_113099_1_1479           | 28128   | NR_113099       | Prevotella corporis strain JCM 8529 16S ribosomal RNA gene, partial sequence                 | 3-Feb-15      | 4-Jan-18      | 1           | Prevotella corporis                     | RefSeq                        | Prevotella corporis                     | 1479   | 0           | JCM 8529            | rRNA        |                                                     |                  | 1         | 1479     | TRUE    | ncbi_filtered | 28128   |
| JN867254_1_1402            | 28130   | JN867254        | Prevotella disiens strain SEQ178 16S ribosomal RNA gene, partial sequence                    | 30-Mar-12     | 4-Jan-18      | 1           | Prevotella disiens                      |                               | Prevotella disiens                      | 1402   | 4           | SEQ178              | genomic DNA | human clinical isolate                              |                  | 1         | 1402     | FALSE   | ncbi_filtered | 28130   |
| JN867299_1_1415            | 28130   | JN867299        | Prevotella disiens strain SEQ226 16S ribosomal RNA gene, partial sequence                    | 30-Mar-12     | 4-Jan-18      | 1           | Prevotella disiens                      |                               | Prevotella disiens                      | 1415   | 4           | SEQ226              | genomic DNA | human clinical isolate                              |                  | 1         | 1415     | FALSE   | ncbi_filtered | 28130   |
| KF280302_1_1301            | 28130   | KF280302        | Prevotella disiens strain DNF00882 16S ribosomal RNA gene, partial sequence                  | 14-Aug-13     | 4-Jan-18      | 1           | Prevotella disiens                      |                               | Prevotella disiens                      | 1301   | 2           | DNF00882            | genomic DNA | vaginal fluid from subject with bacterial vaginosis |                  | 1         | 1301     | FALSE   | ncbi_filtered | 28130   |
| NR_113103_1_1492           | 28130   | NR_113103       | Prevotella disiens strain JCM 6334 16S ribosomal RNA gene, partial sequence                  | 3-Feb-15      | 4-Jan-18      | 1           | Prevotella disiens                      | RefSeq                        | Prevotella disiens                      | 1492   | 0           | JCM 6334            | rRNA        |                                                     |                  | 1         | 1492     | TRUE    | ncbi_filtered | 28130   |
| NZ_AEO01000016_12981_14517 | 866771  | NZ_AEO01000016  | Prevotella disiens FB035-09AN ctg1125417240314, whole genome shotgun sequence                | 15-Nov-17     | 4-Jan-18      | 1           | Prevotella disiens FB035-09AN           | WGS,RefSeq                    | Prevotella disiens FB035-09AN           | 1537   | 0           | FB035-09AN          | genomic DNA | biological product [ENVO:02000043]                  |                  | 12981     | 14517    | FALSE   | ncbi_filtered | 28130   |
| AP018049_1431991_1433518   | 28132   | AP018049        | Prevotella melaninogenica DNA, complete genome, strain: GAI 07411                            | 1-Sep-17      | 4-Jan-18      | 1           | Prevotella melaninogenica               |                               | Prevotella melaninogenica               | 1528   | 0           | GAI 07411           | genomic DNA |                                                     |                  | 1431991   | 1433518  | FALSE   | ncbi_filtered | 28132   |
| JF830512_1_1478            | 28132   | JF830512        | Prevotella melaninogenica strain C561 16S ribosomal RNA gene, partial sequence               | 8-Mar-11      | 4-Jan-18      | 1           | Prevotella melaninogenica               |                               | Prevotella melaninogenica               | 1478   | 2           | C561                | genomic DNA | cystic fibrosis sputum                              |                  | 1         | 1478     | FALSE   | ncbi_filtered | 28132   |
| JN867264_1_1424            | 28132   | JN867264        | Prevotella melaninogenica strain SEQ189 16S ribosomal RNA gene, partial sequence             | 30-Mar-12     | 4-Jan-18      | 1           | Prevotella melaninogenica               |                               | Prevotella melaninogenica               | 1424   | 3           | SEQ189              | genomic DNA | human clinical isolate                              |                  | 1         | 1424     | FALSE   | ncbi_filtered | 28132   |
| JN867295_1_1432            | 28132   | JN867295        | Prevotella melaninogenica strain SEQ220 16S ribosomal RNA gene, partial sequence             | 30-Mar-12     | 4-Jan-18      | 1           | Prevotella melaninogenica               |                               | Prevotella melaninogenica               | 1432   | 3           | SEQ220              | genomic DNA | human clinical isolate                              |                  | 1         | 1432     | FALSE   | ncbi_filtered | 28132   |
| NC_014370_1506639_1508175  | 553174  | NC_014370       | Prevotella melaninogenica ATCC 25845 chromosome 1, complete sequence                         | 7-Apr-17      | 4-Jan-18      | 1           | Prevotella melaninogenica ATCC 25845    | RefSeq                        | Prevotella melaninogenica ATCC 25845    | 1537   | 0           | ATCC 25845          | genomic DNA |                                                     |                  | 1506639   | 1508175  | TRUE    | ncbi_filtered | 28132   |
| GIU409727_1_1453           | 28135   | GIU409727       | Prevotella oris clone_J045 16S ribosomal RNA gene, partial sequence                          | 22-Sep-10     | 4-Jan-18      | 1           | Prevotella oris                         |                               | Prevotella oris                         | 1453   | 0           |                     | genomic DNA | oral cavity                                         |                  | 1         | 1453     | FALSE   | ncbi_filtered | 28135   |
| JN867292_1_1412            | 28135   | JN867292        | Prevotella oris strain SEQ217 16S ribosomal RNA gene, partial sequence                       | 30-Mar-12     | 4-Jan-18      | 1           | Prevotella oris                         |                               | Prevotella oris                         | 1412   | 6           | SEQ217              | genomic DNA | human clinical isolate                              |                  | 1         | 1412     | FALSE   | ncbi_filtered | 28135   |
| NZ_BAIC0100066_43_1576     | 1122989 | NZ_BAIC0100066  | Prevotella oris DSM 18711 = JCM 12252, whole genome shotgun sequence                         | 9-Apr-17      | 4-Jan-18      | 1           | Prevotella oris DSM 18711 = JCM 12252   | WGS,RefSeq,STANDARD_DRAFT     | Prevotella oris DSM 18711 = JCM 12252   | 1534   | 0           | JCM 12252           | genomic DNA |                                                     |                  | 43        | 1576     | TRUE    | ncbi_filtered | 28135   |
| NZ_GG703886_206984_208520  | 649760  | NZ_GG703886     | Prevotella oris F0302 scf35, whole genome shotgun sequence                                   | 7-Apr-17      | 4-Jan-18      | 1           | Prevotella oris F0302                   | WGS,RefSeq                    | Prevotella oris F0302                   | 1537   | 0           | F0302               | genomic DNA | biological product [ENVO:02000043]                  |                  | 206984    | 208520   | FALSE   | ncbi_filtered | 28135   |
| NZ_GL349585_4077_5612      | 563008  | NZ_GL349585     | Prevotella oris C735 supercont1.22, whole genome shotgun sequence                            | 7-Apr-17      | 4-Jan-18      | 1           | Prevotella oris C735                    | WGS,RefSeq                    | Prevotella oris C735                    | 1536   | 0           | C735                | genomic DNA | biological product [ENVO:02000043]                  |                  | 4077      | 5612     | FALSE   | ncbi_filtered | 28135   |
| NR_029147_1_1510           | 28136   | NR_029147       | Prevotella oulorum strain WPH 179 16S ribosomal RNA gene, partial sequence                   | 3-Feb-15      | 4-Jan-18      | 1           | Prevotella oulorum                      | RefSeq                        | Prevotella oulorum                      | 1510   | 0           | WPH 179; ATCC 43324 | rRNA        |                                                     |                  | 1         | 1510     | TRUE    | ncbi_filtered | 28136   |
| NZ_BAIQ0100092_249_1784    | 1136497 | NZ_BAIQ0100092  | Prevotella oulorum JCM 14966, whole genome shotgun sequence                                  | 9-Apr-17      | 4-Jan-18      |             |                                         |                               |                                         |        |             |                     |             |                                                     |                  |           |          |         |               |         |

| seqname                   | tax_id | accession       | description                                                                                        | modified_date | download_date | version_num | source                                    | keywords             | organism                                  | length | ambig_count | strain              | mol_type    | isolate                                                                                    | isolation_source | seq_start | seq_stop | is_top | collection    | species |
|---------------------------|--------|-----------------|----------------------------------------------------------------------------------------------------|---------------|---------------|-------------|-------------------------------------------|----------------------|-------------------------------------------|--------|-------------|---------------------|-------------|--------------------------------------------------------------------------------------------|------------------|-----------|----------|--------|---------------|---------|
| NR_025428_1_1366          | 28210  | NR_025428       | Chelatoxococcus asaccharovorans strain TE2 16S ribosomal RNA gene, partial sequence                | 3-Feb-15      | 4-Jan-18      | 1           | Chelatoxococcus asaccharovorans           | RefSeq               | Chelatoxococcus asaccharovorans           | 1366   | 0           | TE2                 | rRNA        |                                                                                            |                  | 1         | 1366     | TRUE   | ncbi_filtered | 28210   |
| NC_004432_1236488_1238013 | 272633 | NC_004432       | Mycoplasma penetrans HF-2 DNA, complete genome                                                     | 17-Apr-17     | 4-Jan-18      | 1           | Mycoplasma penetrans HF-2                 | RefSeq               | Mycoplasma penetrans HF-2                 | 1526   | 0           | HF-2                | genomic DNA |                                                                                            |                  | 1236488   | 1238013  | FALSE  | ncbi_filtered | 28227   |
| NR_118664_1_1452          | 28227  | NR_118664       | Mycoplasma penetrans strain GTU-54-611 16S ribosomal RNA, partial sequence                         | 24-Oct-17     | 4-Jan-18      | 1           | Mycoplasma penetrans                      | RefSeq               | Mycoplasma penetrans                      | 1452   | 0           | GTU-54-611          | rRNA        |                                                                                            |                  | 1         | 1452     | TRUE   | ncbi_filtered | 28227   |
| GU561418_1_1416           | 28449  | GU561418        | Neisseria subflava strain GH11 16S ribosomal RNA gene, partial sequence                            | 13-Mar-10     | 4-Jan-18      | 1           | Neisseria subflava                        |                      | Neisseria subflava                        | 1416   | 0           | GH11                | genomic DNA | oral cavity                                                                                |                  | 1         | 1416     | FALSE  | ncbi_filtered | 28449   |
| KC178512_1_1406           | 28449  | KC178512        | Neisseria subflava strain 4899a 16S ribosomal RNA gene, partial sequence                           | 5-Feb-13      | 4-Jan-18      | 1           | Neisseria subflava                        |                      | Neisseria subflava                        | 1406   | 0           | 4899a               | genomic DNA | mouth                                                                                      |                  | 1         | 1406     | FALSE  | ncbi_filtered | 28449   |
| KO096300_1_1463           | 28449  | KO096300        | Neisseria subflava culture-collection KCOM:2600 16S ribosomal RNA gene, partial sequence           | 26-Dec-16     | 4-Jan-18      | 1           | Neisseria subflava                        |                      | Neisseria subflava                        | 1463   | 0           | CHDC PV-A42         | genomic DNA | tongue subgingival dental plaque                                                           |                  | 1         | 1463     | FALSE  | ncbi_filtered | 28449   |
| KO096303_1_1463           | 28449  | KO096303        | Neisseria subflava culture-collection KCOM:2604 16S ribosomal RNA gene, partial sequence           | 26-Dec-16     | 4-Jan-18      | 1           | Neisseria subflava                        |                      | Neisseria subflava                        | 1463   | 0           | CHDC PV-A46         | genomic DNA | tongue subgingival dental plaque                                                           |                  | 1         | 1463     | FALSE  | ncbi_filtered | 28449   |
| KO096317_1_1463           | 28449  | KO096317        | Neisseria subflava culture-collection KCOM:2627 16S ribosomal RNA gene, partial sequence           | 26-Dec-16     | 4-Jan-18      | 1           | Neisseria subflava                        |                      | Neisseria subflava                        | 1463   | 0           | CHDC PV-A69         | genomic DNA | gingivitis subgingival dental plaque                                                       |                  | 1         | 1463     | FALSE  | ncbi_filtered | 28449   |
| AB100739_1_1430           | 28454  | AB100739        | Sphingobacterium multivorum gene for 16S rRNA, partial sequence                                    | 29-Jan-03     | 4-Jan-18      | 1           | Sphingobacterium multivorum               |                      | Sphingobacterium multivorum               | 1430   | 0           | IAM15026            | genomic DNA | dairy product                                                                              |                  | 1         | 1430     | FALSE  | ncbi_filtered | 28454   |
| AB680405_1_1455           | 28454  | AB680405        | Sphingobacterium multivorum strain-NBRC 13310 16S ribosomal RNA gene, partial sequence             | 28-Jan-12     | 4-Jan-18      | 1           | Sphingobacterium multivorum               |                      | Sphingobacterium multivorum               | 1455   | 5           | NBRC 13310          | genomic DNA |                                                                                            |                  | 1         | 1455     | FALSE  | ncbi_filtered | 28454   |
| AB680731_1_1455           | 28454  | AB680731        | Sphingobacterium multivorum gene for 16S rRNA, partial sequence, strain: NBRC 14983                | 28-Jan-12     | 4-Jan-18      | 1           | Sphingobacterium multivorum               |                      | Sphingobacterium multivorum               | 1455   | 11          | NBRC 14983          | genomic DNA |                                                                                            |                  | 1         | 1455     | FALSE  | ncbi_filtered | 28454   |
| EU240953_1_1398           | 28454  | EU240953        | Sphingobacterium multivorum strain DW-7 16S ribosomal RNA gene, partial sequence                   | 13-Jan-08     | 4-Jan-18      | 1           | Sphingobacterium multivorum               |                      | Sphingobacterium multivorum               | 1398   | 0           | DW-7                | genomic DNA |                                                                                            |                  | 1         | 1398     | FALSE  | ncbi_filtered | 28454   |
| X0082881_1_1381           | 28454  | X0082881        | Sphingobacterium multivorum strain BR-51 16S ribosomal RNA gene, partial sequence                  | 25-May-16     | 4-Jan-18      | 1           | Sphingobacterium multivorum               |                      | Sphingobacterium multivorum               | 1381   | 0           | BR-51               | genomic DNA | root                                                                                       |                  | 1         | 1381     | FALSE  | ncbi_filtered | 28454   |
| NR_026120_1_1461          | 29321  | NR_026120       | Turicella otitidis strain 23A/92 16S ribosomal RNA gene, partial sequence                          | 3-Feb-15      | 4-Jan-18      | 1           | Turicella otitidis                        | RefSeq;ribosomal RNA | Turicella otitidis                        | 1461   | 6           | 23A/92, DSM 8821    | rRNA        |                                                                                            |                  | 1         | 1461     | TRUE   | ncbi_filtered | 29321   |
| NZ_HF541869_3460_5028     | 883169 | NZ_HF541869     | Turicella otitidis ATCC 51513, whole genome shotgun sequence                                       | 8-Apr-17      | 4-Jan-18      | 1           | Turicella otitidis ATCC 51513             | WGS;RefSeq           | Turicella otitidis ATCC 51513             | 1569   | 0           | ATCC 51513          | genomic DNA |                                                                                            |                  | 3460      | 5028     | TRUE   | ncbi_filtered | 29321   |
| NZ_LBNF01000094_61_1632   | 29321  | NZ_LBNF01000094 | Turicella otitidis strain T01 PROKKA_contig000094, whole genome shotgun sequence                   | 10-Apr-17     | 4-Jan-18      | 1           | Turicella otitidis                        | WGS;RefSeq           | Turicella otitidis                        | 1572   | 0           | T01                 | genomic DNA | central line catheter tip culture                                                          |                  | 61        | 1632     | FALSE  | ncbi_filtered | 29321   |
| AY169415_1_1490           | 29361  | AY169415        | Clostridium nexile 16S ribosomal RNA gene, partial sequence                                        | 4-Apr-03      | 4-Jan-18      | 1           | Tyzzerella nexilis                        |                      | Tyzzerella nexilis                        | 1490   | 0           |                     | genomic DNA | low temperature anaerobic enrichment of a Greenland ice core sample from 3042 meters depth |                  | 1         | 1490     | FALSE  | ncbi_filtered | 29361   |
| NR_029248_1_1517          | 29361  | NR_029248       | Tyzzerella nexilis strain DSM 1787 16S ribosomal RNA, partial sequence                             | 24-Oct-17     | 4-Jan-18      | 1           | Tyzzerella nexilis                        | RefSeq               | Tyzzerella nexilis                        | 1517   | 4           | DSM 1787            | rRNA        |                                                                                            |                  | 1         | 1517     | TRUE   | ncbi_filtered | 29361   |
| JN713195_1_1519           | 29374  | JN713195        | Fillifactor villosus canine oral taxon 031 clone ODD49 16S ribosomal RNA gene, partial sequence    | 9-May-12      | 4-Jan-18      | 1           | Fillifactor villosus                      | ENV                  | Fillifactor villosus                      | 1519   | 0           |                     | genomic DNA | oral cavity subgingival plaque                                                             |                  | 1         | 1519     | FALSE  | ncbi_filtered | 29374   |
| KM462034_1_1519           | 29374  | KM462034        | Fillifactor villosus clone TE129 16S ribosomal RNA gene, partial sequence                          | 8-Dec-14      | 4-Jan-18      | 1           | Fillifactor villosus                      |                      | Fillifactor villosus                      | 1519   | 0           |                     | genomic DNA |                                                                                            |                  | 1         | 1519     | FALSE  | ncbi_filtered | 29374   |
| KM462084_1_1519           | 29374  | KM462084        | Fillifactor villosus clone TF096 16S ribosomal RNA gene, partial sequence                          | 8-Dec-14      | 4-Jan-18      | 1           | Fillifactor villosus                      |                      | Fillifactor villosus                      | 1519   | 0           |                     | genomic DNA |                                                                                            |                  | 1         | 1519     | FALSE  | ncbi_filtered | 29374   |
| NR_041928_1_1450          | 29374  | NR_041928       | Fillifactor villosus strain DSM 1645 16S ribosomal RNA gene, partial sequence                      | 3-Feb-15      | 4-Jan-18      | 1           | Fillifactor villosus                      | RefSeq               | Fillifactor villosus                      | 1450   | 0           | DSM 1645            | rRNA        |                                                                                            |                  | 1         | 1450     | TRUE   | ncbi_filtered | 29374   |
| JM969368_1_1496           | 29378  | JM969368        | Staphylococcus arlettae strain ac1p1-T5A 16S ribosomal RNA gene, partial sequence                  | 1-Feb-12      | 4-Jan-18      | 1           | Staphylococcus arlettae                   |                      | Staphylococcus arlettae                   | 1496   | 0           | ac1p1-T5A           | genomic DNA | midgut                                                                                     |                  | 1         | 1496     | FALSE  | ncbi_filtered | 29378   |
| KC989939_1_1479           | 29378  | KC989939        | Staphylococcus arlettae strain K11-10-92 16S ribosomal RNA gene, partial sequence                  | 10-Jun-15     | 4-Jan-18      | 1           | Staphylococcus arlettae                   |                      | Staphylococcus arlettae                   | 1479   | 0           | K11-10-92           | genomic DNA | desert soil from Jodag, Little earn of Kutch                                               |                  | 1         | 1479     | FALSE  | ncbi_filtered | 29378   |
| KF478183_1_1528           | 29378  | KF478183        | Staphylococcus arlettae strain IHB B 8022 16S ribosomal RNA gene, partial sequence                 | 14-Aug-13     | 4-Jan-18      | 1           | Staphylococcus arlettae                   |                      | Staphylococcus arlettae                   | 1528   | 0           | IHB B 8022          | genomic DNA | tea roots                                                                                  |                  | 1         | 1528     | FALSE  | ncbi_filtered | 29378   |
| KJ197175_1_1410           | 29378  | KJ197175        | Staphylococcus arlettae strain LH-Ka6 16S ribosomal RNA gene, partial sequence                     | 26-May-14     | 4-Jan-18      | 1           | Staphylococcus arlettae                   |                      | Staphylococcus arlettae                   | 1410   | 0           | LH-Ka6              | genomic DNA | gut of mulberry leafhopper                                                                 |                  | 1         | 1410     | FALSE  | ncbi_filtered | 29378   |
| KJ848510_1_1462           | 29378  | KJ848510        | Staphylococcus arlettae strain BT 141 16S ribosomal RNA gene, partial sequence                     | 30-Jun-14     | 4-Jan-18      | 1           | Staphylococcus arlettae                   |                      | Staphylococcus arlettae                   | 1462   | 0           | BT 141              | genomic DNA | gut                                                                                        |                  | 1         | 1462     | FALSE  | ncbi_filtered | 29378   |
| JG624770_1_1412           | 29379  | JG624770        | Staphylococcus auricularis culture-collection EWax5 16S ribosomal RNA gene, partial sequence       | 11-Apr-12     | 4-Jan-18      | 1           | Staphylococcus auricularis                |                      | Staphylococcus auricularis                | 1412   | 1           |                     | genomic DNA | cerumen                                                                                    |                  | 1         | 1412     | FALSE  | ncbi_filtered | 29379   |
| JG624773_1_1413           | 29379  | JG624773        | Staphylococcus auricularis culture-collection EWax2 16S ribosomal RNA gene, partial sequence       | 11-Apr-12     | 4-Jan-18      | 1           | Staphylococcus auricularis                |                      | Staphylococcus auricularis                | 1413   | 1           |                     | genomic DNA | cerumen                                                                                    |                  | 1         | 1413     | FALSE  | ncbi_filtered | 29379   |
| JG624774_1_1410           | 29379  | JG624774        | Staphylococcus auricularis culture-collection EWax1 16S ribosomal RNA gene, partial sequence       | 11-Apr-12     | 4-Jan-18      | 1           | Staphylococcus auricularis                |                      | Staphylococcus auricularis                | 1410   | 1           |                     | genomic DNA | cerumen                                                                                    |                  | 1         | 1410     | FALSE  | ncbi_filtered | 29379   |
| NR_036897_1_1475          | 29379  | NR_036897       | Staphylococcus auricularis strain WK 811M 16S ribosomal RNA gene, partial sequence                 | 3-Feb-15      | 4-Jan-18      | 1           | Staphylococcus auricularis                | RefSeq               | Staphylococcus auricularis                | 1475   | 0           | WK 811M, ATCC 33753 | rRNA        |                                                                                            |                  | 1         | 1475     | TRUE   | ncbi_filtered | 29379   |
| NR_118683_1_1470          | 29379  | NR_118683       | Staphylococcus auricularis strain ATCC 33753 16S ribosomal RNA gene, partial sequence              | 3-Feb-15      | 4-Jan-18      | 1           | Staphylococcus auricularis                | RefSeq               | Staphylococcus auricularis                | 1470   | 2           | ATCC 33753          | rRNA        |                                                                                            |                  | 1         | 1470     | TRUE   | ncbi_filtered | 29379   |
| AY346310_1_1565           | 29380  | AY346310        | Staphylococcus caprae HCP4 16S ribosomal RNA gene, partial sequence                                | 19-Aug-03     | 4-Jan-18      | 1           | Staphylococcus caprae                     |                      | Staphylococcus caprae                     | 1565   | 0           | HCP4                | genomic DNA | effluent of treatment plant wastewater with dye residues                                   |                  | 1         | 1565     | FALSE  | ncbi_filtered | 29380   |
| HG421011_1_1516           | 29380  | HG421011        | Staphylococcus caprae partial 16S rRNA gene, strain 53                                             | 8-Aug-13      | 4-Jan-18      | 1           | Staphylococcus caprae                     |                      | Staphylococcus caprae                     | 1516   | 0           | 53                  | genomic DNA | forest soil                                                                                |                  | 1         | 1516     | FALSE  | ncbi_filtered | 29380   |
| KF993661_1_1475           | 29380  | KF993661        | Staphylococcus caprae strain 3B 16S ribosomal RNA gene, partial sequence                           | 8-May-14      | 4-Jan-18      | 1           | Staphylococcus caprae                     |                      | Staphylococcus caprae                     | 1475   | 0           | 3B                  | genomic DNA | volat forearm                                                                              |                  | 1         | 1475     | FALSE  | ncbi_filtered | 29380   |
| KX223392_1_1419           | 29380  | KX223392        | Staphylococcus caprae strain NOR-36 16S ribosomal RNA gene, partial sequence                       | 23-Jan-17     | 4-Jan-18      | 1           | Staphylococcus caprae                     |                      | Staphylococcus caprae                     | 1419   | 0           | NOR-36              | genomic DNA | activated sludge                                                                           |                  | 1         | 1419     | FALSE  | ncbi_filtered | 29380   |
| NZ_GG696777_109_1664      | 525378 | NZ_GG696777     | Staphylococcus caprae M23864-W1 SCAFFOLDS, whole genome shotgun sequence                           | 7-Apr-17      | 4-Jan-18      | 1           | Staphylococcus caprae M23864-W1           | WGS;RefSeq           | Staphylococcus caprae M23864-W1           | 1556   | 0           | M23864-W1           | genomic DNA |                                                                                            |                  | 109       | 1664     | FALSE  | ncbi_filtered | 29380   |
| AY161046_1_1448           | 29382  | AY161046        | Staphylococcus cohnii strain PLC-9 16S ribosomal RNA gene, partial sequence                        | 19-Jan-03     | 4-Jan-18      | 1           | Staphylococcus cohnii                     |                      | Staphylococcus cohnii                     | 1448   | 0           | PLC-9               | genomic DNA |                                                                                            |                  | 1         | 1448     | FALSE  | ncbi_filtered | 29382   |
| KT260738_1_1345           | 29382  | KT260738        | Staphylococcus cohnii strain RCBS26 16S ribosomal RNA gene, partial sequence                       | 19-Sep-15     | 4-Jan-18      | 1           | Staphylococcus cohnii                     |                      | Staphylococcus cohnii                     | 1345   | 0           | RCBS26              | genomic DNA | cave ceiling soil                                                                          |                  | 1         | 1345     | FALSE  | ncbi_filtered | 29382   |
| KU894780_1_1503           | 29382  | KU894780        | UNVERIFIED: Staphylococcus cohnii 16S ribosomal RNA gene, partial sequence                         | 14-Nov-16     | 4-Jan-18      | 1           | Staphylococcus cohnii                     | UNVERIFIED_ORGANISM  | Staphylococcus cohnii                     | 1503   | 0           |                     | genomic DNA | gut                                                                                        |                  | 1         | 1503     | FALSE  | ncbi_filtered | 29382   |
| MG205924_1_1326           | 29382  | MG205924        | Staphylococcus cohnii strain NIOER202 16S ribosomal RNA gene, partial sequence                     | 22-Oct-17     | 4-Jan-18      | 1           | Staphylococcus cohnii                     |                      | Staphylococcus cohnii                     | 1326   | 0           | NIOER202            | genomic DNA | water from station G5                                                                      |                  | 1         | 1326     | FALSE  | ncbi_filtered | 29382   |
| NZ_LATV01000016_1_1254    | 74704  | NZ_LATV01000016 | Staphylococcus cohnii subsp. cohnii strain 532 Contig_26, whole genome shotgun sequence            | 3-Apr-17      | 4-Jan-18      | 1           | Staphylococcus cohnii subsp. cohnii       | WGS;RefSeq           | Staphylococcus cohnii subsp. cohnii       | 1254   | 0           | 532                 | genomic DNA | catheter                                                                                   |                  | 1         | 1254     | FALSE  | ncbi_filtered | 29382   |
| EU855228_1_1514           | 29385  | EU855228        | Staphylococcus saprophyticus strain CTSP11 16S ribosomal RNA gene, partial sequence                | 9-Sep-14      | 4-Jan-18      | 1           | Staphylococcus saprophyticus              |                      | Staphylococcus saprophyticus              | 1514   | 0           | CTSP11              | genomic DNA | strained soy paste                                                                         |                  | 1         | 1514     | FALSE  | ncbi_filtered | 29385   |
| JQ304794_1_1403           | 29385  | JQ304794        | Staphylococcus saprophyticus strain ECP804 16S ribosomal RNA gene, partial sequence                | 12-Feb-12     | 4-Jan-18      | 1           | Staphylococcus saprophyticus              |                      | Staphylococcus saprophyticus              | 1403   | 0           | ECP804              | genomic DNA | soil                                                                                       |                  | 1         | 1403     | FALSE  | ncbi_filtered | 29385   |
| KT003250_1_1464           | 29385  | KT003250        | Staphylococcus saprophyticus strain HN-4 16S ribosomal RNA gene, partial sequence                  | 29-Jun-15     | 4-Jan-18      | 1           | Staphylococcus saprophyticus              |                      | Staphylococcus saprophyticus              | 1464   | 0           | HN-4                | genomic DNA | spacecraft surface                                                                         |                  | 1         | 1464     | FALSE  | ncbi_filtered | 29385   |
| KT720168_1_1425           | 147453 | KT720168        | Staphylococcus saprophyticus subsp. bovis strain W128_3.1 16S ribosomal RNA gene, partial sequence | 28-Nov-15     | 4-Jan-18      | 1           | Staphylococcus saprophyticus subsp. bovis |                      | Staphylococcus saprophyticus subsp. bovis | 1425   | 0           | W128_3.1            | genomic DNA | Phoenix Faring spacecraft surfaces                                                         |                  | 1         | 1425     | FALSE  | ncbi_filtered | 29385   |
| KY992543_1_1564           | 29385  | KY992543        | Staphylococcus saprophyticus strain TA2 16S ribosomal RNA gene, partial sequence                   | 2-May-17      | 4-Jan-18      | 1           | Staphylococcus saprophyticus              |                      | Staphylococcus saprophyticus              | 1564   | 0           | TA2                 | genomic DNA |                                                                                            |                  | 1         | 1564     | FALSE  | ncbi_filtered | 29385   |
| FJ357580_1_1439           | 29388  | FJ357580        | Staphylococcus capitis strain BBEC-1d 16S ribosomal RNA gene, partial sequence                     | 13-Jan-09     | 4-Jan-18      | 1           | Staphylococcus capitis                    |                      | Staphylococcus capitis                    | 1439   | 3           | BBEC-1d             | genomic DNA | egg                                                                                        |                  | 1         | 1439     | FALSE  | ncbi_filtered | 29388   |
| FJ357585_1_1434           | 29388  | FJ357585        | Staphylococcus capitis strain BBEC-01d 16S ribosomal RNA gene, partial sequence                    | 13-Jan-09     | 4-Jan-18      | 1           | Staphylococcus capitis                    |                      | Staphylococcus capitis                    | 1434   | 1           | BBEC-01d            | genomic DNA | egg                                                                                        |                  | 1         | 1434     | FALSE  | ncbi_filtered | 29388   |
| KR149341_1_1462           | 29388  | KR149341        | Staphylococcus capitis strain Sc-C81 16S ribosomal RNA gene, partial sequence                      | 12-May-16     | 4-Jan-18      | 1           | Staphylococcus capitis                    |                      | Staphylococcus capitis                    | 1462   | 1           | Sc-C81              | genomic DNA | fumigated vinegar                                                                          |                  | 1         | 1462     | FALSE  | ncbi_filtered | 29388   |
| KR800414_1_1495           | 29388  | KR800414        | Staphylococcus capitis strain 11J 16S ribosomal RNA gene, partial sequence                         | 4-Sep-16      | 4-Jan-18      | 1           | Staphylococcus capitis                    |                      | Staphylococcus capitis                    |        |             |                     |             |                                                                                            |                  |           |          |        |               |         |

| seqname                      | tax_id  | accession       | description                                                                                          | modified_date | download_date | version_num | source                         | keywords                        | organism                       | length | ambig_count | strain     | mol_type    | isolate | isolation_source                                  | seq_start | seq_stop | is_type | collection    | species |
|------------------------------|---------|-----------------|------------------------------------------------------------------------------------------------------|---------------|---------------|-------------|--------------------------------|---------------------------------|--------------------------------|--------|-------------|------------|-------------|---------|---------------------------------------------------|-----------|----------|---------|---------------|---------|
| KC329832_1_1482              | 29430   | KC329832        | Acinetobacter haemolyticus strain 30A 16S ribosomal RNA gene, partial sequence                       | 2-Feb-13      | 4-Jan-18      | 1           | Acinetobacter haemolyticus     |                                 | Acinetobacter haemolyticus     | 1482   | 0           | 30A        | genomic DNA |         | tuber                                             | 1         | 1482     | FALSE   | ncbi_filtered | 29430   |
| KJ806450_1_1372              | 29430   | KJ806450        | Acinetobacter haemolyticus strain A-81A 16S ribosomal RNA gene, partial sequence                     | 28-May-14     | 4-Jan-18      | 1           | Acinetobacter haemolyticus     |                                 | Acinetobacter haemolyticus     | 1372   | 0           | A-81A      | genomic DNA |         |                                                   | 1         | 1372     | FALSE   | ncbi_filtered | 29430   |
| KF726971_1_1308              | 29430   | KF726971        | Acinetobacter haemolyticus strain RCBS79 16S ribosomal RNA gene, partial sequence                    | 19-Sep-15     | 4-Jan-18      | 1           | Acinetobacter haemolyticus     |                                 | Acinetobacter haemolyticus     | 1308   | 0           | RCBS79     | genomic DNA |         | bat guano                                         | 1         | 1308     | FALSE   | ncbi_filtered | 29430   |
| K7767696_1_1443              | 29430   | K7767696        | Acinetobacter haemolyticus strain B31 16S ribosomal RNA gene, partial sequence                       | 29-Sep-15     | 4-Jan-18      | 1           | Acinetobacter haemolyticus     |                                 | Acinetobacter haemolyticus     | 1443   | 0           | B31        | genomic DNA |         | milk                                              | 1         | 1443     | FALSE   | ncbi_filtered | 29430   |
| AJ239281_1_1355              | 29434   | AJ239281        | Neisseria pharyngis 16S rRNA gene (partial), strain NCTC4590                                         | 1-Jul-99      | 4-Jan-18      | 1           | Neisseria pharyngis            | 16S ribosomal RNA;16S rRNA gene | Neisseria pharyngis            | 1355   | 0           | NCTC4590   | genomic DNA |         |                                                   | 1         | 1355     | FALSE   | ncbi_filtered | 29434   |
| KM225744_1_1491              | 29434   | KM225744        | Neisseria pharyngis strain B8 16S ribosomal RNA gene, partial sequence                               | 23-Oct-14     | 4-Jan-18      | 1           | Neisseria pharyngis            |                                 | Neisseria pharyngis            | 1491   | 0           | B8         | genomic DNA |         | interproximal dental plaque                       | 1         | 1491     | FALSE   | ncbi_filtered | 29434   |
| AV649435_1_1487              | 29448   | AV649435        | Bradyrhizobium elkanii strain BR3281 16S ribosomal RNA gene, partial sequence                        | 18-Jul-04     | 4-Jan-18      | 1           | Bradyrhizobium elkanii         |                                 | Bradyrhizobium elkanii         | 1487   | 0           | BR3281     | genomic DNA |         |                                                   | 1         | 1487     | FALSE   | ncbi_filtered | 29448   |
| AY904744_1_1450              | 29448   | AY904744        | Bradyrhizobium elkanii strain SEMIA 6028 16S ribosomal RNA gene, partial sequence                    | 23-May-06     | 4-Jan-18      | 1           | Bradyrhizobium elkanii         |                                 | Bradyrhizobium elkanii         | 1450   | 0           | SEMIA 6028 | genomic DNA |         | root nodule                                       | 1         | 1450     | FALSE   | ncbi_filtered | 29448   |
| AY904789_1_1450              | 29448   | AY904789        | Bradyrhizobium elkanii strain SEMIA 6440 16S ribosomal RNA gene, partial sequence                    | 23-May-06     | 4-Jan-18      | 1           | Bradyrhizobium elkanii         |                                 | Bradyrhizobium elkanii         | 1450   | 0           | SEMIA 6440 | genomic DNA |         | root nodule                                       | 1         | 1450     | FALSE   | ncbi_filtered | 29448   |
| FJ025102_1_1468              | 29448   | FJ025102        | Bradyrhizobium elkanii strain SEMIA 6399 16S ribosomal RNA gene, partial sequence                    | 10-Feb-17     | 4-Jan-18      | 1           | Bradyrhizobium elkanii         |                                 | Bradyrhizobium elkanii         | 1468   | 0           | SEMIA 6399 | genomic DNA |         | nodule                                            | 1         | 1468     | FALSE   | ncbi_filtered | 29448   |
| KP744138_1_1222              | 29448   | KP744138        | Bradyrhizobium elkanii strain DRO1 16S ribosomal RNA gene, partial sequence                          | 5-Apr-15      | 4-Jan-18      | 1           | Bradyrhizobium elkanii         |                                 | Bradyrhizobium elkanii         | 1222   | 0           | DRO1       | genomic DNA |         | mineral water                                     | 1         | 1222     | FALSE   | ncbi_filtered | 29448   |
| AF439640_1_1409              | 29466   | AF439640        | Veillonella parvula 16S ribosomal RNA gene, partial sequence                                         | 12-May-04     | 4-Jan-18      | 1           | Veillonella parvula            |                                 | Veillonella parvula            | 1409   | 2           | CIP 60.1   | genomic DNA |         |                                                   | 1         | 1409     | FALSE   | ncbi_filtered | 29466   |
| GU350451_1_1540              | 29466   | GU350451        | Veillonella parvula strain X002 16S ribosomal RNA gene, partial sequence                             | 30-Jan-10     | 4-Jan-18      | 1           | Veillonella parvula            |                                 | Veillonella parvula            | 1540   | 0           | X002       | genomic DNA |         | oral microbiome                                   | 1         | 1540     | FALSE   | ncbi_filtered | 29466   |
| GU574206_1_1443              | 29466   | GU574206        | Veillonella parvula strain GR72 16S ribosomal RNA gene, partial sequence                             | 24-Mar-10     | 4-Jan-18      | 1           | Veillonella parvula            |                                 | Veillonella parvula            | 1443   | 0           | GR72       | genomic DNA |         | oral cavity                                       | 1         | 1443     | FALSE   | ncbi_filtered | 29466   |
| KF052121_1_1420              | 29466   | KF052121        | Veillonella parvula strain ML1 16S ribosomal RNA gene, partial sequence                              | 26-Sep-13     | 4-Jan-18      | 1           | Veillonella parvula            |                                 | Veillonella parvula            | 1420   | 0           | ML1        | genomic DNA |         | rumen                                             | 1         | 1420     | FALSE   | ncbi_filtered | 29466   |
| NZ_CP019721_8060_9628        | 29466   | NZ_CP019721     | Veillonella parvula strain UTDB1-3, complete genome                                                  | 23-Feb-17     | 4-Jan-18      | 1           | Veillonella parvula            | RefSeq                          | Veillonella parvula            | 1569   | 0           | UTDB1-3    | genomic DNA |         | singubingval plaque                               | 8060      | 9628     | FALSE   | ncbi_filtered | 29466   |
| KM462003_1_1524              | 29524   | KM462003        | Porphyromonas circumdentaria clone TED45 16S ribosomal RNA gene, partial sequence                    | 8-Dec-14      | 4-Jan-18      | 1           | Porphyromonas circumdentaria   |                                 | Porphyromonas circumdentaria   | 1524   | 0           |            | genomic DNA |         |                                                   | 1         | 1524     | FALSE   | ncbi_filtered | 29524   |
| KM462038_1_1524              | 29524   | KM462038        | Porphyromonas circumdentaria clone TE136 16S ribosomal RNA gene, partial sequence                    | 8-Dec-14      | 4-Jan-18      | 1           | Porphyromonas circumdentaria   |                                 | Porphyromonas circumdentaria   | 1524   | 0           |            | genomic DNA |         |                                                   | 1         | 1524     | FALSE   | ncbi_filtered | 29524   |
| KM462040_1_1524              | 29524   | KM462040        | Porphyromonas circumdentaria clone TE141 16S ribosomal RNA gene, partial sequence                    | 8-Dec-14      | 4-Jan-18      | 1           | Porphyromonas circumdentaria   |                                 | Porphyromonas circumdentaria   | 1524   | 0           |            | genomic DNA |         |                                                   | 1         | 1524     | FALSE   | ncbi_filtered | 29524   |
| NR_113083_1_1476             | 29524   | NR_113083       | Porphyromonas circumdentaria strain JCM 13864 16S ribosomal RNA gene, partial sequence               | 3-Feb-15      | 4-Jan-18      | 1           | Porphyromonas circumdentaria   | RefSeq                          | Porphyromonas circumdentaria   | 1476   | 0           | JCM 13864  | rRNA        |         |                                                   | 1         | 1476     | TRUE    | ncbi_filtered | 29524   |
| NZ_FUXE01000032_302_1843     | 29524   | NZ_FUXE01000032 | Porphyromonas circumdentaria strain ATCC 51356, whole genome shotgun sequence                        | 10-Mar-17     | 4-Jan-18      | 1           | Porphyromonas circumdentaria   | WGS,RefSeq                      | Porphyromonas circumdentaria   | 1542   | 0           | ATCC 51356 | genomic DNA |         |                                                   | 302       | 1843     | TRUE    | ncbi_filtered | 29524   |
| AB681049_1_1452              | 29529   | AB681049        | Chitinophaga arvensicola gene for 16S rRNA, partial sequence, strain: NBRC 16134                     | 28-Jan-12     | 4-Jan-18      | 1           | Chitinophaga arvensicola       |                                 | Chitinophaga arvensicola       | 1452   | 4           | NBRC 16134 | genomic DNA |         |                                                   | 1         | 1452     | FALSE   | ncbi_filtered | 29529   |
| AB681051_1_1452              | 29529   | AB681051        | Chitinophaga arvensicola gene for 16S rRNA, partial sequence, strain: NBRC 16137                     | 28-Jan-12     | 4-Jan-18      | 1           | Chitinophaga arvensicola       |                                 | Chitinophaga arvensicola       | 1452   | 0           | NBRC 16137 | genomic DNA |         |                                                   | 1         | 1452     | FALSE   | ncbi_filtered | 29529   |
| AB908086_1_1394              | 29529   | AB908086        | Chitinophaga arvensicola gene for 16S ribosomal RNA, partial sequence, strain: MRP-16                | 7-Feb-14      | 4-Jan-18      | 1           | Chitinophaga arvensicola       |                                 | Chitinophaga arvensicola       | 1394   | 0           | MRP-16     | genomic DNA |         | Dioscorea batatas rhizoplane                      | 1         | 1394     | FALSE   | ncbi_filtered | 29529   |
| AM237312_1_1449              | 29529   | AM237312        | Chitinophaga arvensicola partial 16S rRNA gene, strain FX1                                           | 12-Dec-06     | 4-Jan-18      | 1           | Chitinophaga arvensicola       | 16S ribosomal RNA;16S rRNA gene | Chitinophaga arvensicola       | 1449   | 0           | FX1        | genomic DNA |         | sphagnum peat                                     | 1         | 1449     | FALSE   | ncbi_filtered | 29529   |
| NR_113715_1_1452             | 29529   | NR_113715       | Chitinophaga arvensicola strain NBRC 14973 16S ribosomal RNA gene, partial sequence                  | 3-Feb-15      | 4-Jan-18      | 1           | Chitinophaga arvensicola       | RefSeq                          | Chitinophaga arvensicola       | 1452   | 5           | NBRC 14973 | rRNA        |         |                                                   | 1         | 1452     | TRUE    | ncbi_filtered | 29529   |
| KJ657047_1_1263              | 29533   | KJ657047        | Flavobacterium pectinovorum strain DSM 36368 16S ribosomal RNA gene, partial sequence                | 12-Nov-12     | 4-Jan-18      | 1           | Flavobacterium pectinovorum    |                                 | Flavobacterium pectinovorum    | 1263   | 3           | DSM 36368  | genomic DNA |         |                                                   | 1         | 1263     | FALSE   | ncbi_filtered | 29533   |
| KF704086_1_1378              | 29533   | KF704086        | Flavobacterium pectinovorum strain AD-R2 16S ribosomal RNA gene, partial sequence                    | 10-Dec-13     | 4-Jan-18      | 1           | Flavobacterium pectinovorum    |                                 | Flavobacterium pectinovorum    | 1378   | 0           | AD-R2      | genomic DNA |         |                                                   | 1         | 1378     | FALSE   | ncbi_filtered | 29533   |
| KJ589515_1_1381              | 29533   | KJ589515        | Flavobacterium pectinovorum strain D2B2 16S ribosomal RNA gene, partial sequence                     | 11-Jun-14     | 4-Jan-18      | 1           | Flavobacterium pectinovorum    |                                 | Flavobacterium pectinovorum    | 1381   | 0           | D2B2       | genomic DNA |         |                                                   | 1         | 1381     | FALSE   | ncbi_filtered | 29533   |
| KP762208_1_1252              | 29533   | KP762208        | Flavobacterium pectinovorum strain B21CS2014 16S ribosomal RNA gene, partial sequence                | 12-Aug-15     | 4-Jan-18      | 1           | Flavobacterium pectinovorum    |                                 | Flavobacterium pectinovorum    | 1252   | 1           | B21CS2014  | genomic DNA |         | ballast water                                     | 1         | 1252     | FALSE   | ncbi_filtered | 29533   |
| NZ_FRB00100014_3719_5236     | 29533   | NZ_FRB00100014  | Flavobacterium pectinovorum strain DSM 6368, whole genome shotgun sequence                           | 17-Aug-17     | 4-Jan-18      | 1           | Flavobacterium pectinovorum    | WGS,RefSeq                      | Flavobacterium pectinovorum    | 1518   | 0           | DSM 6368   | genomic DNA |         |                                                   | 3719      | 5236     | TRUE    | ncbi_filtered | 29533   |
| DQ473538_1_1526              | 29581   | DQ473538        | Janthinobacterium lividum strain GA01 16S ribosomal RNA gene, complete sequence                      | 1-May-07      | 4-Jan-18      | 1           | Janthinobacterium lividum      |                                 | Janthinobacterium lividum      | 1526   | 6           | GA01       | genomic DNA |         |                                                   | 1         | 1526     | FALSE   | ncbi_filtered | 29581   |
| KT369907_1_1395              | 29581   | KT369907        | Janthinobacterium lividum strain YF11-3(4) 16S ribosomal RNA gene, partial sequence                  | 1-Oct-15      | 4-Jan-18      | 1           | Janthinobacterium lividum      |                                 | Janthinobacterium lividum      | 1395   | 1           | YF11-3(4)  | genomic DNA |         | Ollian mountain                                   | 1         | 1395     | FALSE   | ncbi_filtered | 29581   |
| KY742771_1_1375              | 29581   | KY742771        | Janthinobacterium lividum strain 267.12.1 16S ribosomal RNA gene, partial sequence                   | 30-Aug-17     | 4-Jan-18      | 1           | Janthinobacterium lividum      |                                 | Janthinobacterium lividum      | 1375   | 2           | 267.12.1   | genomic DNA |         | skin                                              | 1         | 1375     | FALSE   | ncbi_filtered | 29581   |
| NZ_AHH01000021_217508_219048 | 111221  | NZ_AHH01000021  | Janthinobacterium lividum strain PAMC 25724 ctg718000005886, whole genome shotgun sequence           | 18-May-17     | 4-Jan-18      | 1           | Janthinobacterium lividum      | WGS,RefSeq                      | Janthinobacterium lividum      | 1541   | 0           | PAMC 25724 | genomic DNA |         | glacier's cryoconite from Alps mountain           | 217508    | 219048   | FALSE   | ncbi_filtered | 29581   |
| NZ_JFVR01000027_17_1557      | 29581   | NZ_JFVR01000027 | Janthinobacterium lividum strain RIT308 contig33, whole genome shotgun sequence                      | 2-Apr-17      | 4-Jan-18      | 1           | Janthinobacterium lividum      | WGS,RefSeq                      | Janthinobacterium lividum      | 1541   | 0           | RIT308     | genomic DNA |         | Willow (Salix sp.)                                | 17        | 1557     | FALSE   | ncbi_filtered | 29581   |
| FXY01000049_297_1830         | 1255616 | FXY01000049     | Brevibacterium iodinum ATCC 49514 genome assembly, contig: Contig1049, whole genome shotgun sequence | 23-Nov-17     | 4-Jan-18      | 1           | Brevibacterium iodinum         | WGS                             | Brevibacterium iodinum         | 1534   | 0           | ATCC 49514 | genomic DNA |         |                                                   | 297       | 1830     | TRUE    | ncbi_filtered | 31943   |
| JQ014187_1_1435              | 31943   | JQ014187        | Brevibacterium iodinum strain JS111 16S ribosomal RNA gene, partial sequence                         | 17-Jan-12     | 4-Jan-18      | 1           | Brevibacterium iodinum         |                                 | Brevibacterium iodinum         | 1435   | 13          | JS111      | genomic DNA |         | heavy metal contaminated soil                     | 1         | 1435     | FALSE   | ncbi_filtered | 31943   |
| JX393074_1_1490              | 31943   | JX393074        | Brevibacterium iodinum strain GCM1 16S ribosomal RNA gene, partial sequence                          | 21-Oct-12     | 4-Jan-18      | 1           | Brevibacterium iodinum         |                                 | Brevibacterium iodinum         | 1490   | 0           | GCM1       | genomic DNA |         | gut                                               | 1         | 1490     | FALSE   | ncbi_filtered | 31943   |
| KJ193903_1_1380              | 31943   | KJ193903        | Brevibacterium iodinum strain NBMR13 16S ribosomal RNA gene, partial sequence                        | 11-Apr-14     | 4-Jan-18      | 1           | Brevibacterium iodinum         |                                 | Brevibacterium iodinum         | 1230   | 0           | NBMR13     | genomic DNA |         | intestinal mucus of olive flounder                | 1         | 1230     | FALSE   | ncbi_filtered | 31943   |
| KO056048_1_1287              | 31943   | KO056048        | Brevibacterium iodinum strain NIES-118 16S ribosomal RNA gene, partial sequence                      | 13-Dec-16     | 4-Jan-18      | 1           | Brevibacterium iodinum         |                                 | Brevibacterium iodinum         | 1387   | 0           | NIES-118   | genomic DNA |         |                                                   | 1         | 1387     | FALSE   | ncbi_filtered | 31943   |
| GQ895736_1_1390              | 31998   | GQ895736        | Methylobacterium radiotolerans strain DX-T3-Q2 16S ribosomal RNA gene, partial sequence              | 14-Oct-09     | 4-Jan-18      | 1           | Methylobacterium radiotolerans |                                 | Methylobacterium radiotolerans | 1390   | 0           | DX-T3-Q2   | genomic DNA |         | heavy metal polluted soil near Deving copper mine | 1         | 1390     | FALSE   | ncbi_filtered | 31998   |
| GU294321_1_1490              | 31998   | GU294321        | Methylobacterium radiotolerans strain LM2 16S ribosomal RNA gene, partial sequence                   | 27-Jan-10     | 4-Jan-18      | 1           | Methylobacterium radiotolerans |                                 | Methylobacterium radiotolerans | 1490   | 0           | LM2        | genomic DNA |         | leaf                                              | 1         | 1490     | FALSE   | ncbi_filtered | 31998   |
| JO659454_1_1369              | 31998   | JO659454        | Methylobacterium radiotolerans strain L7-747 16S ribosomal RNA gene, partial sequence                | 23-Dec-15     | 4-Jan-18      | 1           | Methylobacterium radiotolerans |                                 | Methylobacterium radiotolerans | 1369   | 0           | L7-747     | genomic DNA |         | plant tissue                                      | 1         | 1369     | FALSE   | ncbi_filtered | 31998   |
| JO660061_1_1439              | 31998   | JO660061        | Methylobacterium radiotolerans strain 52-47 16S ribosomal RNA gene, partial sequence                 | 23-Dec-15     | 4-Jan-18      | 1           | Methylobacterium radiotolerans |                                 | Methylobacterium radiotolerans | 1439   | 0           | 52-47      | genomic DNA |         | plant tissue                                      | 1         | 1439     | FALSE   | ncbi_filtered | 31998   |
| NC_010510_146434_147952      | 426355  | NC_010510       | Methylobacterium radiotolerans JCM 2831 plasmid pMRAD01, complete sequence                           | 19-May-17     | 4-Jan-18      | 1           | Methylobacterium radiotolerans | RefSeq                          | Methylobacterium radiotolerans | 1519   | 0           | JCM 2831   | genomic DNA |         |                                                   | 146434    | 147952   | TRUE    | ncbi_filtered | 31998   |
| AF232712_1_1435              | 32002   | AF232712        | Achromobacter denitrificans subsp. denitrificans 16S ribosomal RNA gene, partial sequence            | 11-Oct-00     | 4-Jan-18      | 1           | Achromobacter denitrificans    |                                 | Achromobacter denitrificans    | 1435   | 0           | AF232712   | genomic DNA |         |                                                   | 1         | 1435     | FALSE   | ncbi_filtered | 32002   |
| EU301775_1_1264              | 32002   | EU301775        | Achromobacter denitrificans strain L2 16S ribosomal RNA gene, partial sequence                       | 18-Dec-07     | 4-Jan-18      | 1           | Achromobacter denitrificans    |                                 | Achromobacter denitrificans    | 1264   | 0           | L2         | genomic DNA |         | soil                                              | 1         | 1264     | FALSE   | ncbi_filtered | 32002   |
| KM268799_1_1432              | 32002   | KM268799        | Achromobacter denitrificans strain BTC3 16S ribosomal RNA gene, complete sequence                    | 15-Nov-14     | 4-Jan-18      | 1           | Achromobacter denitrificans    |                                 | Achromobacter denitrificans    | 1432   | 0           | BTC3       | genomic DNA |         | soil                                              | 1         | 1432     | FALSE   | ncbi_filtered | 32002   |
| K799661_1_1399               | 32002   | K799661         | Achromobacter denitrificans strain IL_4 16S ribosomal RNA gene, partial sequence                     | 3-Oct-15      | 4-Jan-18      | 1           | Achromobacter denitrificans    |                                 | Achromobacter denitrificans    | 1399   | 0           | IL_4       | genomic DNA |         | waste water treatment plant                       | 1         | 1399     | FALSE   | ncbi_filtered | 32002   |
| KX229786_1_1454              | 32002   | KX229786        | Achromobacter denitrificans strain SW2 16S ribosomal RNA gene, partial sequence                      | 7-Aug-16      | 4-Jan-18      | 1           | Achromobacter denitrificans    |                                 | Achromobacter denitrificans    | 1454   | 0           | SW2        |             |         |                                                   |           |          |         |               |         |



| seqname                       | tax_id  | accession       | description                                                                                          | modified_date | download_date | version | num_source                                    | keywords                        | organism                                      | length | ambig_count | strain               | mol_type    | isolate                 | isolation_source                   | seq_start | seq_stop | is_top        | collection    | species |
|-------------------------------|---------|-----------------|------------------------------------------------------------------------------------------------------|---------------|---------------|---------|-----------------------------------------------|---------------------------------|-----------------------------------------------|--------|-------------|----------------------|-------------|-------------------------|------------------------------------|-----------|----------|---------------|---------------|---------|
| NZ_AUIB01000007_114169_115700 | 1123001 | NZ_AUIB01000007 | Propionimicrobium lymphophilum DSM 4903                                                              | 8-Apr-17      | 4-Jan-18      | 1       | Propionimicrobium lymphophilum DSM 4903       | WGS;RefSeq                      | Propionimicrobium lymphophilum DSM 4903       | 1532   | 0           | DSM 4903             | genomic DNA |                         |                                    | 114169    | 115700   | TRUE          | ncbi_filtered | 33012   |
| NZ_KE150269_832675_834204     | 883161  | NZ_KE150269     | Propionimicrobium lymphophilum ACS-093-V-SCH5 acit-supercorn-complete, whole genome shotgun sequence | 8-Apr-17      | 4-Jan-18      | 1       | Propionimicrobium lymphophilum ACS-093-V-SCH5 | WGS;HIGH_QUALITY_DRAFT;RefSeq   | Propionimicrobium lymphophilum ACS-093-V-SCH5 | 1530   | 0           | ACS-093-V-SCH5       | genomic DNA |                         |                                    | 832675    | 834204   | FALSE         | ncbi_filtered | 33012   |
| NZ_ABXA01000039_532_2066      | 561177  | NZ_ABXA01000039 | Anaerococcus hydrogenalis DSM 7454 A_hydrogenalis-1.0_Cont154.1, whole genome shotgun sequence       | 7-Apr-17      | 4-Jan-18      | 1       | Anaerococcus hydrogenalis DSM 7454            | WGS;RefSeq                      | Anaerococcus hydrogenalis DSM 7454            | 1535   | 0           | DSM 7454             | genomic DNA |                         | biological product [ENVO.02000043] | 532       | 2066     | TRUE          | ncbi_filtered | 33029   |
| NZ_K0955441_36_1570           | 33029   | NZ_K0955441     | Anaerococcus hydrogenalis strain MUR7738A Scaffold0253, whole genome shotgun sequence                | 11-Apr-17     | 4-Jan-18      | 1       | Anaerococcus hydrogenalis                     | WGS;HIGH_QUALITY_DRAFT;RefSeq   | Anaerococcus hydrogenalis                     | 1535   | 0           | MUR7738A             | genomic DNA |                         | Vagina                             | 36        | 1570     | FALSE         | ncbi_filtered | 33029   |
| PNHP01000002_336617_338151    | 33029   | PNHP01000002    | Anaerococcus hydrogenalis strain LMB0204 ERR1203615.17957.1_27.2, whole genome shotgun sequence      | 10-Jan-18     | 12-Jan-18     | 1       | Anaerococcus hydrogenalis                     | WGS                             | Anaerococcus hydrogenalis                     | 1535   | 0           | UMB0204              | genomic DNA |                         | catheter                           | 336617    | 338151   | FALSE         | ncbi_filtered | 33029   |
| NR_042753_1_1423              | 997350  | NR_042753       | Peptoniphilus indolicus strain CCG 46591 16S ribosomal RNA gene, partial sequence                    | 3-Feb-15      | 4-Jan-18      | 1       | Peptoniphilus indolicus ATCC 29427            | RefSeq                          | Peptoniphilus indolicus ATCC 29427            | 1423   | 2           | CCUG 46591           | rRNA        |                         |                                    | 1         | 1423     | TRUE          | ncbi_filtered | 33030   |
| NR_115153_1_1299              | 997350  | NR_115153       | Peptoniphilus indolicus strain CCG 17639 16S ribosomal RNA gene, partial sequence                    | 3-Feb-15      | 4-Jan-18      | 1       | Peptoniphilus indolicus ATCC 29427            | RefSeq                          | Peptoniphilus indolicus ATCC 29427            | 1299   | 1           | CCUG 17639           | rRNA        |                         |                                    | 1         | 1299     | TRUE          | ncbi_filtered | 33030   |
| NR_117566_1_1287              | 997350  | NR_117566       | Peptoniphilus indolicus strain ATCC 29427 16S ribosomal RNA gene, partial sequence                   | 3-Feb-15      | 4-Jan-18      | 1       | Peptoniphilus indolicus ATCC 29427            | RefSeq                          | Peptoniphilus indolicus ATCC 29427            | 1287   | 0           | ATCC 29427           | rRNA        |                         |                                    | 1         | 1287     | TRUE          | ncbi_filtered | 33030   |
| AB971812_1_1488               | 33031   | AB971812        | Peptoniphilus lacrimalis strain JCM 8139                                                             | 3-Jul-14      | 4-Jan-18      | 1       | Peptoniphilus lacrimalis                      | RefSeq                          | Peptoniphilus lacrimalis                      | 1488   | 0           | JCM 8139             | genomic DNA |                         |                                    | 1         | 1488     | TRUE          | ncbi_filtered | 33031   |
| JRNL01000120_1_1526           | 1401070 | JRNL01000120    | Peptoniphilus lacrimalis DNF00528 contig120, whole genome shotgun sequence                           | 26-Sep-14     | 4-Jan-18      | 1       | Peptoniphilus lacrimalis DNF00528             | WGS;HIGH_QUALITY_DRAFT          | Peptoniphilus lacrimalis DNF00528             | 1526   | 0           | DNF00528             | genomic DNA |                         | vagina                             | 1         | 1526     | FALSE         | ncbi_filtered | 33031   |
| KMG24632_1_1489               | 33031   | KMG24632        | Peptoniphilus lacrimalis strain E4-1295686 16S ribosomal RNA gene, partial sequence                  | 3-Feb-15      | 4-Jan-18      | 1       | Peptoniphilus lacrimalis                      | RefSeq                          | Peptoniphilus lacrimalis                      | 1489   | 0           | E4-1295686           | genomic DNA |                         | blood specimen                     | 1         | 1489     | FALSE         | ncbi_filtered | 33031   |
| NZ_ADD001000050_69_1603       | 596330  | NZ_ADD001000050 | Peptoniphilus lacrimalis 315-B contig0049, whole genome shotgun sequence                             | 15-Nov-17     | 4-Jan-18      | 1       | Peptoniphilus lacrimalis 315-B                | WGS;RefSeq                      | Peptoniphilus lacrimalis 315-B                | 1535   | 0           | 315-B                | rRNA        |                         | biological product [ENVO.02000043] | 69        | 1603     | FALSE         | ncbi_filtered | 33031   |
| NR_113565_1_1489              | 33031   | NR_113565       | Anaerococcus lactolyticus strain JCM 8140 16S ribosomal RNA gene, partial sequence                   | 3-Feb-15      | 4-Jan-18      | 1       | Anaerococcus lactolyticus                     | RefSeq                          | Anaerococcus lactolyticus                     | 1489   | 0           | JCM 8140             | rRNA        |                         |                                    | 1         | 1489     | TRUE          | ncbi_filtered | 33032   |
| NZ_JRMW01000023_272_1807      | 1284686 | NZ_JRMW01000023 | Anaerococcus lactolyticus 57-1-13 contig23, whole genome shotgun sequence                            | 9-Apr-17      | 4-Jan-18      | 1       | Anaerococcus lactolyticus 57-1-13             | WGS;RefSeq                      | Anaerococcus lactolyticus 57-1-13             | 1536   | 0           | 57-1-13              | genomic DNA |                         | vagina                             | 272       | 1807     | FALSE         | ncbi_filtered | 33032   |
| AM176521_1_1450               | 33033   | AM176521        | Micromonas micros partial 16S rRNA gene, isolate gao022                                              | 26-Mar-08     | 4-Jan-18      | 1       | Parvimonas micra                              | 16S ribosomal RNA;16S rRNA gene | Parvimonas micra                              | 1450   | 0           | genomic DNA          | gao022      | pus from pleural cavity | 1                                  | 1450      | FALSE    | ncbi_filtered | 33033         |         |
| KP944177_1_1421               | 33033   | KP944177        | Parvimonas micra strain 1002-10071 16S ribosomal RNA gene, partial sequence                          | 1-Sep-15      | 4-Jan-18      | 1       | Parvimonas micra                              | RefSeq                          | Parvimonas micra                              | 1421   | 0           | 1002-10071           | genomic DNA |                         | pus                                | 1         | 1421     | FALSE         | ncbi_filtered | 33033   |
| KP944178_1_1421               | 33033   | KP944178        | Parvimonas micra strain NN01105 16S ribosomal RNA gene, partial sequence                             | 1-Sep-15      | 4-Jan-18      | 1       | Parvimonas micra                              | RefSeq                          | Parvimonas micra                              | 1432   | 0           | NN01105              | genomic DNA |                         | ascites                            | 1         | 1432     | FALSE         | ncbi_filtered | 33033   |
| NZ_AQU01000035_50_1481        | 1408286 | NZ_AQU01000035  | Parvimonas micra A293 Contig35, whole genome shotgun sequence                                        | 9-Apr-17      | 4-Jan-18      | 1       | Parvimonas micra A293                         | WGS;RefSeq                      | Parvimonas micra A293                         | 1432   | 0           | A293                 | genomic DNA |                         | abdominal abscess                  | 50        | 1481     | FALSE         | ncbi_filtered | 33033   |
| NZ_CP009761_137054_138584     | 33033   | NZ_CP009761     | Parvimonas micra strain KCOM 1535, complete genome                                                   | 9-Apr-17      | 4-Jan-18      | 1       | Parvimonas micra                              | RefSeq                          | Parvimonas micra                              | 1531   | 0           | KCOM 1535; CHDC 8708 | genomic DNA |                         | periapical abscess                 | 137054    | 138584   | FALSE         | ncbi_filtered | 33033   |
| AB558162_1_1427               | 33034   | AB558162        | Anaerococcus prevotii gene for 16S ribosomal RNA, partial sequence, strain: JCM 6490                 | 9-Nov-12      | 4-Jan-18      | 1       | Anaerococcus prevotii                         | RefSeq                          | Anaerococcus prevotii                         | 1427   | 0           | JCM 6490             | genomic DNA |                         |                                    | 1         | 1427     | TRUE          | ncbi_filtered | 33034   |
| AB971807_1_1488               | 33034   | AB971807        | Anaerococcus prevotii gene for 16S ribosomal RNA, partial sequence, strain: JCM 6508                 | 3-Jul-14      | 4-Jan-18      | 1       | Anaerococcus prevotii                         | RefSeq                          | Anaerococcus prevotii                         | 1488   | 4           | JCM 6508             | genomic DNA |                         |                                    | 1         | 1488     | TRUE          | ncbi_filtered | 33034   |
| NC_013171_235843_237376       | 525919  | NC_013171       | Anaerococcus prevotii DSM 20548, complete genome                                                     | 7-Apr-17      | 4-Jan-18      | 1       | Anaerococcus prevotii DSM 20548               | RefSeq                          | Anaerococcus prevotii DSM 20548               | 1534   | 0           | DSM 20548            | genomic DNA |                         |                                    | 235843    | 237376   | TRUE          | ncbi_filtered | 33034   |
| NC_013171_643490_645021       | 525919  | NC_013171       | Anaerococcus prevotii DSM 20548, complete genome                                                     | 7-Apr-17      | 4-Jan-18      | 1       | Anaerococcus prevotii DSM 20548               | RefSeq                          | Anaerococcus prevotii DSM 20548               | 1534   | 0           | DSM 20548            | genomic DNA |                         |                                    | 643490    | 645021   | TRUE          | ncbi_filtered | 33034   |
| NR_041939_1_1381              | 525919  | NR_041939       | Anaerococcus prevotii strain CCG 41932 16S ribosomal RNA gene, partial sequence                      | 3-Feb-15      | 4-Jan-18      | 1       | Anaerococcus prevotii DSM 20548               | RefSeq                          | Anaerococcus prevotii DSM 20548               | 1381   | 2           | CCUG 41932           | rRNA        |                         |                                    | 1         | 1381     | TRUE          | ncbi_filtered | 33034   |
| GQ42749_1_1501                | 33036   | GQ42749         | Anaerococcus tetradus strain F0127 16S ribosomal RNA gene, partial sequence                          | 14-Sep-09     | 4-Jan-18      | 1       | Anaerococcus tetradus                         | RefSeq                          | Anaerococcus tetradus                         | 1501   | 0           | F0127                | genomic DNA |                         | dental plaque                      | 1         | 1501     | FALSE         | ncbi_filtered | 33036   |
| LC036320_1_1487               | 33036   | LC036320        | Anaerococcus tetradus strain JCM 1564                                                                | 20-Mar-15     | 4-Jan-18      | 1       | Anaerococcus tetradus                         | RefSeq                          | Anaerococcus tetradus                         | 1487   | 1           | JCM 1564             | genomic DNA |                         |                                    | 1         | 1487     | TRUE          | ncbi_filtered | 33036   |
| NR_041941_1_1418              | 33036   | NR_041941       | Anaerococcus tetradus strain CCG 46590 16S ribosomal RNA gene, partial sequence                      | 3-Feb-15      | 4-Jan-18      | 1       | Anaerococcus tetradus                         | RefSeq                          | Anaerococcus tetradus                         | 1418   | 1           | CCUG 46590           | rRNA        |                         |                                    | 1         | 1418     | TRUE          | ncbi_filtered | 33036   |
| NZ_GG666301_63377_64908       | 525255  | NZ_GG666301     | Anaerococcus tetradus ATCC 35098 SCAFFOLD7, whole genome shotgun sequence                            | 7-Apr-17      | 4-Jan-18      | 1       | Anaerococcus tetradus ATCC 35098              | WGS;RefSeq                      | Anaerococcus tetradus ATCC 35098              | 1532   | 0           | ATCC 35098           | genomic DNA |                         | biological product [ENVO.02000043] | 63377     | 64908    | TRUE          | ncbi_filtered | 33036   |
| NZ_KQ955130_49_1579           | 33036   | NZ_KQ955130     | Anaerococcus tetradus strain MIBR151 Scaffold335, whole genome shotgun sequence                      | 11-Apr-17     | 4-Jan-18      | 1       | Anaerococcus tetradus                         | WGS;HIGH_QUALITY_DRAFT;RefSeq   | Anaerococcus tetradus                         | 1531   | 0           | MIBR151              | genomic DNA |                         | Vagina                             | 49        | 1579     | FALSE         | ncbi_filtered | 33036   |
| NR_114314_1_1488              | 655811  | NR_114314       | Anaerococcus vaginalis strain JCM 8138 16S ribosomal RNA gene, partial sequence                      | 3-Feb-15      | 4-Jan-18      | 1       | Anaerococcus vaginalis ATCC 51170             | RefSeq                          | Anaerococcus vaginalis ATCC 51170             | 1488   | 0           | JCM 8138             | rRNA        |                         |                                    | 1         | 1488     | TRUE          | ncbi_filtered | 33037   |
| NR_115508_1_1375              | 33037   | NR_115508       | Anaerococcus vaginalis strain GIFU 12669 16S ribosomal RNA gene, partial sequence                    | 3-Feb-15      | 4-Jan-18      | 1       | Anaerococcus vaginalis                        | RefSeq                          | Anaerococcus vaginalis                        | 1375   | 11          | GIFU 12669           | rRNA        |                         |                                    | 1         | 1375     | TRUE          | ncbi_filtered | 33037   |
| NZ_H978624_3707_5240          | 33037   | NZ_H978624      | Anaerococcus vaginalis strain PH9, whole genome shotgun sequence                                     | 8-Apr-17      | 4-Jan-18      | 1       | Anaerococcus vaginalis                        | WGS;RefSeq                      | Anaerococcus vaginalis                        | 1534   | 0           | PH9                  | genomic DNA |                         | host stool sample                  | 3707      | 5240     | FALSE         | ncbi_filtered | 33037   |
| AB910746_1_1492               | 33039   | AB910746        | [Ruminococcus] torques gene for 16S ribosomal RNA, partial sequence                                  | 21-Feb-14     | 4-Jan-18      | 1       | [Ruminococcus] torques                        | RefSeq                          | [Ruminococcus] torques                        | 1492   | 0           | JCM 6553             | genomic DNA |                         |                                    | 1         | 1492     | FALSE         | ncbi_filtered | 33039   |
| NR_036777_1_1418              | 33039   | NR_036777       | [Ruminococcus] torques strain VPI B2-51 16S ribosomal RNA gene, partial sequence                     | 3-Feb-15      | 4-Jan-18      | 1       | [Ruminococcus] torques                        | RefSeq                          | [Ruminococcus] torques                        | 1418   | 4           | VPI B2-51            | rRNA        |                         |                                    | 1         | 1418     | TRUE          | ncbi_filtered | 33039   |
| NZ_DS264352_1769_3308         | 411460  | NZ_DS264352     | Ruminococcus torques ATCC 27756 Sctf029, whole genome shotgun sequence                               | 10-Apr-17     | 4-Jan-18      | 1       | Ruminococcus torques ATCC 27756               | WGS;RefSeq                      | Ruminococcus torques ATCC 27756               | 1540   | 0           | ATCC 27756           | genomic DNA |                         | biological product [ENVO.02000043] | 1769      | 3308     | TRUE          | ncbi_filtered | 33039   |
| NZ_CVXU01000014_293_1820      | 33043   | NZ_CVXU01000014 | Coprococcus eutactus strain 27895TDY5834963, whole genome shotgun sequence                           | 11-Apr-17     | 4-Jan-18      | 1       | Coprococcus eutactus                          | WGS;RefSeq                      | Coprococcus eutactus                          | 1528   | 0           | 27895TDY5834963      | genomic DNA |                         | faeces                             | 293       | 1820     | FALSE         | ncbi_filtered | 33043   |
| NZ_CYY01000018_9976_11503     | 33043   | NZ_CYY01000018  | Coprococcus eutactus strain 27895TDY5608843, whole genome shotgun sequence                           | 11-Apr-17     | 4-Jan-18      | 1       | Coprococcus eutactus                          | WGS;RefSeq                      | Coprococcus eutactus                          | 1528   | 0           | 27895TDY5608843      | genomic DNA |                         | faeces                             | 9976      | 11503    | FALSE         | ncbi_filtered | 33043   |
| NZ_DS483526_247523_249049     | 411474  | NZ_DS483526     | Coprococcus eutactus ATCC 27759 Sctf0_02_6, whole genome shotgun sequence                            | 7-Apr-17      | 4-Jan-18      | 1       | Coprococcus eutactus ATCC 27759               | WGS;RefSeq                      | Coprococcus eutactus ATCC 27759               | 1527   | 0           | ATCC 27759           | genomic DNA |                         | biological product [ENVO.02000043] | 247523    | 249049   | TRUE          | ncbi_filtered | 33043   |
| NZ_DS483535_832_2324          | 411474  | NZ_DS483535     | Coprococcus eutactus ATCC 27759 Sctf0_02_15, whole genome shotgun sequence                           | 7-Apr-17      | 4-Jan-18      | 1       | Coprococcus eutactus ATCC 27759               | WGS;RefSeq                      | Coprococcus eutactus ATCC 27759               | 1493   | 0           | ATCC 27759           | genomic DNA |                         | biological product [ENVO.02000043] | 832       | 2324     | TRUE          | ncbi_filtered | 33043   |
| NZ_DS483539_196_1722          | 411474  | NZ_DS483539     | Coprococcus eutactus ATCC 27759 Sctf0_02_19, whole genome shotgun sequence                           | 7-Apr-17      | 4-Jan-18      | 1       | Coprococcus eutactus ATCC 27759               | WGS;RefSeq                      | Coprococcus eutactus ATCC 27759               | 1527   | 0           | ATCC 27759           | genomic DNA |                         | biological product [ENVO.02000043] | 196       | 1722     | TRUE          | ncbi_filtered | 33043   |
| KF11700_1_1401                | 33053   | KF11700         | Neisseria perflava strain Pa11 16S ribosomal RNA gene, partial sequence                              | 3-Jul-13      | 4-Jan-18      | 1       | Neisseria perflava                            | RefSeq                          | Neisseria perflava                            | 1401   | 0           | Pa11                 | genomic DNA |                         |                                    | 1         | 1401     | FALSE         | ncbi_filtered | 33053   |
| KO96313_1_1463                | 33053   | KO96313         | Neisseria perflava culture-collection KCOM:2623 16S ribosomal RNA gene, partial sequence             | 26-Dec-16     | 4-Jan-18      | 1       | Neisseria perflava                            | RefSeq                          | Neisseria perflava                            | 1463   | 0           | CHDC PV-A65          | genomic DNA |                         | tongue subgingival dental plaque   | 1         | 1463     | FALSE         | ncbi_filtered | 33053   |
| KO96333_1_1464                | 33053   | KO96333         | Neisseria perflava culture-collection KCOM:2660 16S ribosomal RNA gene, partial sequence             | 26-Dec-16     | 4-Jan-18      | 1       | Neisseria perflava                            | RefSeq                          | Neisseria perflava                            | 1464   | 0           | CHDC PV-A102         | genomic DNA |                         | tongue subgingival dental plaque   | 1         | 1464     | FALSE         | ncbi_filtered | 33053   |
| PKP01000002_281_1826          | 33053   | PKP01000002     | Neisseria perflava strain ERR1203623.17957.1_35.2, whole genome shotgun sequence                     | 28-Dec-17     | 4-Jan-18      | 1       | Neisseria perflava                            | WGS                             | Neisseria perflava                            | 1546   | 0           | UMB0210              | genomic DNA |                         |                                    | 281       | 1826     | FALSE         | ncbi_filtered | 33053   |
| EU954559_1_1431               | 33883   | EU954559        | Microbacterium arborescens strain 3-3 16S ribosomal RNA gene, partial sequence                       | 21-Apr-08     | 4-Jan-18      | 1       | Microbacterium arborescens                    | RefSeq                          | Microbacterium arborescens                    | 1431   | 0           | 3-Mar                | genomic DNA |                         | root and leaves                    | 1         | 1431     | FALSE         | ncbi_filtered | 33883   |
| JN644505_1_1513               | 33883   | JN644505        | Microbacterium arborescens strain JBB_28 16S ribosomal RNA gene, partial sequence                    | 18-Dec-13     | 4-Jan-18      | 1       | Microbacterium arborescens                    | RefSeq                          | Microbacterium arborescens                    | 1513   | 0           | JBB_28               | genomic DNA |                         | midgut                             | 1         | 1513     | FALSE         | ncbi_filtered | 33883   |
| JQ039986_1_1437               | 33883   | JQ039986        | Microbacterium arborescens strain YNA63 16S ribosomal RNA gene, partial sequence                     | 7-Feb-12      | 4-Jan-18      | 1       | Microbacterium arborescens                    | RefSeq                          | Microbacterium arborescens                    | 1437   | 0           | YNA63                | genomic DNA |                         | root                               | 1         | 1437     | FALSE         | ncbi_filtered | 33883   |
| KM874406_1_1401               | 33883   | KM874406        | Microbacterium arborescens strain NE1E7 16S ribosomal RNA gene, partial sequence                     | 1-Aug-17      | 4-Jan-18      | 1       | Microbacterium arborescens                    | RefSeq                          | Microbacterium arborescens                    | 1401   | 0           | NE1E7                | genomic DNA |                         |                                    |           |          |               |               |         |

| seqname                       | tax_id  | accession       | description                                                                               | modified_date | download_date | version | num_source | keywords                  | organism                         | length | ambig_count | strain                  | mol_type    | isolate | isolation_source                                           | seq_start | seq_stop | is_type | collection    | species |
|-------------------------------|---------|-----------------|-------------------------------------------------------------------------------------------|---------------|---------------|---------|------------|---------------------------|----------------------------------|--------|-------------|-------------------------|-------------|---------|------------------------------------------------------------|-----------|----------|---------|---------------|---------|
| KY260521_1_1453               | 33946   | KY260521        | Kurthia gibsonii strain RC309 16S ribosomal RNA gene, partial sequence                    | 19-Sep-15     | 4-Jan-18      | 1       |            |                           | Kurthia gibsonii                 | 1453   | 0           | RC309                   | genomic DNA |         | bat guano                                                  | 1         | 1453     | FALSE   | ncbi_filtered | 33946   |
| KY316491_1_1416               | 33946   | KY316491        | Kurthia gibsonii strain Zlynn1000-52 16S ribosomal RNA gene, partial sequence             | 3-May-17      | 4-Jan-18      | 1       |            |                           | Kurthia gibsonii                 | 1456   | 0           | Zlynn1000-52            | genomic DNA |         | Mount Emei soil                                            | 1         | 1416     | FALSE   | ncbi_filtered | 33946   |
| NC_007940_537796_539304       | 336407  | NC_007940       | Rickettsia belli RML369-C, complete genome                                                | 6-Apr-17      | 4-Jan-18      | 1       |            | RefSeq                    | Rickettsia belli RML369-C        | 1509   | 0           | RML369-C                | genomic DNA |         |                                                            | 537796    | 539304   | TRUE    | ncbi_filtered | 33990   |
| NC_009883_100810_1009668      | 339186  | NC_009883       | Rickettsia belli OSU 85-389, complete genome                                              | 6-Apr-17      | 4-Jan-18      | 1       |            | RefSeq                    | Rickettsia belli OSU 85-389      | 1509   | 0           | OSU 85-389              | genomic DNA |         |                                                            | 100810    | 1009668  | FALSE   | ncbi_filtered | 33990   |
| NZ_LAO100100001_281107_282615 | 1359193 | NZ_LAO100100001 | Rickettsia belli str. RML An4 RMLAn4.comig_0_1, whole genome shotgun sequence             | 10-Apr-17     | 4-Jan-18      | 1       |            | WGS;RefSeq                | Rickettsia belli str. RML An4    | 1509   | 0           | RML An4                 | genomic DNA |         |                                                            | 281107    | 282615   | FALSE   | ncbi_filtered | 33990   |
| NZ_LAO100100001_686613_688121 | 1359194 | NZ_LAO100100001 | Rickettsia belli str. RML Mogi mogi.comig_0_1, whole genome shotgun sequence              | 10-Apr-17     | 4-Jan-18      | 1       |            | WGS;RefSeq                | Rickettsia belli str. RML Mogi   | 1509   | 0           | RML Mogi                | genomic DNA |         |                                                            | 686613    | 688121   | FALSE   | ncbi_filtered | 33990   |
| U11014_1_1501                 | 33990   | U11014          | Rickettsia belli rRNA gene, complete sequence                                             | 9-Sep-96      | 4-Jan-18      | 1       |            |                           | Rickettsia belli                 | 1501   | 0           | strains 369-C and G2D42 | genomic DNA |         |                                                            | 1         | 1501     | FALSE   | ncbi_filtered | 33990   |
| AF127397_1_1383               | 33996   | AF127397        | Glucanacetobacter diazotrophicus isolate SR11212 16S ribosomal RNA gene, partial sequence | 17-Nov-99     | 4-Jan-18      | 1       |            |                           | Glucanacetobacter diazotrophicus | 1383   | 4           |                         | genomic DNA | SR11212 |                                                            | 1         | 1383     | FALSE   | ncbi_filtered | 33996   |
| AY230810_1_1393               | 33996   | AY230810        | Glucanacetobacter diazotrophicus clone UAP-AC10 16S ribosomal RNA gene, partial sequence  | 2-Apr-03      | 4-Jan-18      | 1       |            |                           | Glucanacetobacter diazotrophicus | 1393   | 0           |                         | genomic DNA |         |                                                            | 1         | 1393     | FALSE   | ncbi_filtered | 33996   |
| JX87291_1_1354                | 33996   | JX87291         | Glucanacetobacter diazotrophicus strain SCES 16S ribosomal RNA gene, partial sequence     | 16-Dec-12     | 4-Jan-18      | 1       |            |                           | Glucanacetobacter diazotrophicus | 1354   | 0           | SCES                    | genomic DNA |         |                                                            | 1         | 1354     | FALSE   | ncbi_filtered | 33996   |
| KP969069_1_1484               | 33996   | KP969069        | Glucanacetobacter diazotrophicus strain 16S 16S ribosomal RNA gene, partial sequence      | 11-Aug-15     | 4-Jan-18      | 1       |            |                           | Glucanacetobacter diazotrophicus | 1484   | 0           | 16S                     | genomic DNA |         | roots                                                      | 1         | 1484     | FALSE   | ncbi_filtered | 33996   |
| KP974662_1_1447               | 33996   | KP974662        | Glucanacetobacter diazotrophicus strain 160-1 16S ribosomal RNA gene, partial sequence    | 11-Aug-15     | 4-Jan-18      | 1       |            |                           | Glucanacetobacter diazotrophicus | 1447   | 0           | 160-1                   | genomic DNA |         | roots                                                      | 1         | 1447     | FALSE   | ncbi_filtered | 33996   |
| AJ505785_1_1313               | 34004   | AJ505785        | Paracoccus aminovorans partial 16S rRNA gene, isolate GP43                                | 15-Aug-02     | 4-Jan-18      | 1       |            |                           | Paracoccus aminovorans           | 1313   | 0           |                         | genomic DNA | GP43    |                                                            | 1         | 1313     | FALSE   | ncbi_filtered | 34004   |
| HQ005404_1_1457               | 34004   | HQ005404        | Paracoccus aminovorans strain CT 16S ribosomal RNA gene, partial sequence                 | 30-Aug-10     | 4-Jan-18      | 1       |            |                           | Paracoccus aminovorans           | 1457   | 0           | CT                      | genomic DNA |         |                                                            | 1         | 1457     | FALSE   | ncbi_filtered | 34004   |
| NZ_FOPU01000070_3853_5319     | 34004   | NZ_FOPU01000070 | Paracoccus aminovorans strain DSM 8537, whole genome shotgun sequence                     | 13-Apr-17     | 4-Jan-18      | 1       |            | WGS;RefSeq                | Paracoccus aminovorans           | 1467   | 0           | DSM 8537                | genomic DNA |         |                                                            | 3853      | 5319     | TRUE    | ncbi_filtered | 34004   |
| JF459976_1_1370               | 34015   | JF459976        | Blastomonas natoria strain T4AR3 16S ribosomal RNA gene, partial sequence                 | 12-Mar-13     | 4-Jan-18      | 2       |            |                           | Blastomonas natoria              | 1370   | 0           | T4AR3                   | genomic DNA |         | tap water                                                  | 1         | 1370     | FALSE   | ncbi_filtered | 34015   |
| JF459978_1_1378               | 34015   | JF459978        | Blastomonas natoria strain T6AR1 16S ribosomal RNA gene, partial sequence                 | 12-Mar-13     | 4-Jan-18      | 1       |            |                           | Blastomonas natoria              | 1378   | 0           | T6AR1                   | genomic DNA |         | tap water                                                  | 1         | 1378     | FALSE   | ncbi_filtered | 34015   |
| JF459980_1_1375               | 34015   | JF459980        | Blastomonas natoria strain T7BR15 16S ribosomal RNA gene, partial sequence                | 12-Mar-13     | 4-Jan-18      | 2       |            |                           | Blastomonas natoria              | 1375   | 0           | T7BR15                  | genomic DNA |         | tap water                                                  | 1         | 1375     | FALSE   | ncbi_filtered | 34015   |
| NR_040824_1_1477              | 34015   | NR_040824       | Blastomonas natoria strain DSM 3183 16S ribosomal RNA, partial sequence                   | 24-Oct-17     | 4-Jan-18      | 1       |            | RefSeq                    | Blastomonas natoria              | 1477   | 0           | DSM 3183                | rRNA        |         |                                                            | 1         | 1477     | TRUE    | ncbi_filtered | 34015   |
| Y13774_1_1421                 | 34015   | Y13774          | Blastomonas natoria 16S rRNA gene, partial                                                | 8-Mar-00      | 4-Jan-18      | 1       |            |                           | Blastomonas natoria              | 1421   | 2           | DSM 3183 type strain    | genomic DNA |         |                                                            | 1         | 1421     | FALSE   | ncbi_filtered | 34015   |
| AB643586_1_1492               | 34062   | AB643586        | Moraxella osloensis gene for 16S ribosomal RNA, partial sequence, strain: KMC 41          | 26-Apr-12     | 4-Jan-18      | 1       |            |                           | Moraxella osloensis              | 1492   | 1           | KMC 41                  | genomic DNA |         |                                                            | 1         | 1492     | FALSE   | ncbi_filtered | 34062   |
| AB643587_1_1492               | 34062   | AB643587        | Moraxella osloensis gene for 16S ribosomal RNA, partial sequence, strain: KMC 43          | 26-Apr-12     | 4-Jan-18      | 1       |            |                           | Moraxella osloensis              | 1492   | 2           | KMC 43                  | genomic DNA |         |                                                            | 1         | 1492     | FALSE   | ncbi_filtered | 34062   |
| HM217989_1_1455               | 34062   | HM217989        | Moraxella osloensis strain S44-4 16S ribosomal RNA gene, partial sequence                 | 20-Sep-10     | 4-Jan-18      | 1       |            |                           | Moraxella osloensis              | 1455   | 0           | S44-4                   | genomic DNA |         | fermented dairy products                                   | 1         | 1455     | FALSE   | ncbi_filtered | 34062   |
| KF891346_1_1402               | 34062   | KF891346        | Moraxella osloensis strain JU-WE3 16S ribosomal RNA gene, partial sequence                | 2-Feb-14      | 4-Jan-18      | 1       |            |                           | Moraxella osloensis              | 1402   | 0           | JU-WE3                  | genomic DNA |         |                                                            | 1         | 1402     | FALSE   | ncbi_filtered | 34062   |
| NZ_CP014234_1603801_1605347   | 34062   | NZ_CP014234     | Moraxella osloensis strain CCLUG 350, complete genome                                     | 11-Apr-17     | 4-Jan-18      | 1       |            | RefSeq                    | Moraxella osloensis              | 1547   | 0           | CCLUG 350               | genomic DNA |         | withdrawn fluid                                            | 1603801   | 1605347  | TRUE    | ncbi_filtered | 34062   |
| EU977737_1_1312               | 34073   | EU977737        | Variovorax paradoxus strain LP01PD 16S ribosomal RNA gene, partial sequence               | 8-Jul-13      | 4-Jan-18      | 1       |            |                           | Variovorax paradoxus             | 1312   | 2           | LP01PD                  | genomic DNA |         | Kennedy Space Center clean-room floor                      | 1         | 1312     | FALSE   | ncbi_filtered | 34073   |
| KC128901_1_1417               | 34073   | KC128901        | Variovorax paradoxus strain LZP7 16S ribosomal RNA gene, partial sequence                 | 26-Dec-12     | 4-Jan-18      | 1       |            |                           | Variovorax paradoxus             | 1417   | 0           | LZP7                    | genomic DNA |         | rheosphere soil                                            | 1         | 1417     | FALSE   | ncbi_filtered | 34073   |
| KO150839_1_1399               | 34073   | KO150839        | Variovorax paradoxus strain HatC38 16S ribosomal RNA gene, partial sequence               | 8-Jun-16      | 4-Jan-18      | 1       |            |                           | Variovorax paradoxus             | 1399   | 0           | HatC38                  | genomic DNA |         | root                                                       | 1         | 1399     | FALSE   | ncbi_filtered | 34073   |
| NZ_LKTU01000127_5981_7523     | 34073   | NZ_LKTU01000127 | Variovorax paradoxus strain H061 H061_contig000127, whole genome shotgun sequence         | 11-Apr-17     | 4-Jan-18      | 1       |            | WGS;RefSeq                | Variovorax paradoxus             | 1543   | 0           | H061                    | genomic DNA |         | drinking water                                             | 5981      | 7523     | FALSE   | ncbi_filtered | 34073   |
| NZ_LVHG01000094_389_1931      | 34073   | NZ_LVHG01000094 | Variovorax paradoxus strain KB5 contig_79, whole genome shotgun sequence                  | 5-Apr-17      | 4-Jan-18      | 1       |            | WGS;RefSeq                | Variovorax paradoxus             | 1543   | 0           | KB5                     | genomic DNA |         | apoplast                                                   | 389       | 1931     | FALSE   | ncbi_filtered | 34073   |
| AM709637_1_1451               | 128403  | AM709637        | Scytonema hoffmanni PCC 7110 partial ribosomal RNA operon, strain PCC 7110                | 9-Jul-07      | 4-Jan-18      | 1       |            |                           | Scytonema hoffmanni PCC 7110     | 1451   | 5           | PCC 7110                | genomic DNA |         |                                                            | 1         | 1451     | TRUE    | ncbi_filtered | 34078   |
| ANNX0200016_736599_738092     | 128403  | ANNX0200016     | Scytonema hoffmanni PCC 7110 Scaffold1_13, whole genome shotgun sequence                  | 11-Mar-16     | 4-Jan-18      | 1       |            | WGS                       | Scytonema hoffmanni PCC 7110     | 1494   | 0           | PCC 7110                | genomic DNA |         | a limestone cave                                           | 736599    | 738092   | TRUE    | ncbi_filtered | 34078   |
| ANNX0200020_670240_671731     | 128403  | ANNX0200020     | Scytonema hoffmanni PCC 7110 Scaffold1_17, whole genome shotgun sequence                  | 11-Mar-16     | 4-Jan-18      | 1       |            | WGS                       | Scytonema hoffmanni PCC 7110     | 1492   | 0           | PCC 7110                | genomic DNA |         | a limestone cave                                           | 670240    | 671731   | TRUE    | ncbi_filtered | 34078   |
| ANNX0200047_644436_645927     | 128403  | ANNX0200047     | Scytonema hoffmanni PCC 7110 Scaffold1_41, whole genome shotgun sequence                  | 11-Mar-16     | 4-Jan-18      | 1       |            | WGS                       | Scytonema hoffmanni PCC 7110     | 1492   | 0           | PCC 7110                | genomic DNA |         | a limestone cave                                           | 644436    | 645927   | TRUE    | ncbi_filtered | 34078   |
| AB680842_1_1455               | 34087   | AB680842        | Sphingobacterium faecium gene for 16S rRNA, partial sequence, strain: NBRC 15337          | 28-Jan-12     | 4-Jan-18      | 1       |            |                           | Sphingobacterium faecium         | 1455   | 0           | NBRC 15337              | genomic DNA |         |                                                            | 1         | 1455     | FALSE   | ncbi_filtered | 34087   |
| FJ950574_1_1449               | 34087   | FJ950574        | Sphingobacterium faecium strain c34 16S ribosomal RNA gene, partial sequence              | 25-May-10     | 4-Jan-18      | 1       |            |                           | Sphingobacterium faecium         | 1449   | 0           | c34                     | genomic DNA |         | oxytetracycline production wastewater treatment plant      | 1         | 1449     | FALSE   | ncbi_filtered | 34087   |
| KJ726588_1_1391               | 34087   | KJ726588        | Sphingobacterium faecium strain Gen5 16S ribosomal RNA gene, partial sequence             | 6-Jul-14      | 4-Jan-18      | 1       |            |                           | Sphingobacterium faecium         | 1391   | 0           | Gen5                    | genomic DNA |         | intestine                                                  | 1         | 1391     | FALSE   | ncbi_filtered | 34087   |
| KY472476_1_1386               | 34087   | KY472476        | Sphingobacterium faecium strain 239.12.1 16S ribosomal RNA gene, partial sequence         | 30-Aug-17     | 4-Jan-18      | 1       |            |                           | Sphingobacterium faecium         | 1386   | 3           | 239.12.1                | genomic DNA |         | skin                                                       | 1         | 1386     | FALSE   | ncbi_filtered | 34087   |
| LN995717_1_1482               | 34087   | LN995717        | Sphingobacterium faecium partial 16S rRNA gene, strain R-54745                            | 7-Dec-16      | 4-Jan-18      | 1       |            |                           | Sphingobacterium faecium         | 1482   | 2           | R-54745                 | genomic DNA |         |                                                            | 1         | 1482     | FALSE   | ncbi_filtered | 34087   |
| FJ200385_1_1392               | 36740   | FJ200385        | Dermbacter hominis strain 3361BRJ 16S ribosomal RNA gene, partial sequence                | 2-Jan-13      | 4-Jan-18      | 1       |            |                           | Dermbacter hominis               | 1392   | 0           | 3361BRJ                 | genomic DNA |         | clean room                                                 | 1         | 1392     | FALSE   | ncbi_filtered | 36740   |
| FJ263375_1_1426               | 36740   | FJ263375        | Dermbacter hominis strain RA7 16S ribosomal RNA gene, partial sequence                    | 26-Oct-08     | 4-Jan-18      | 1       |            |                           | Dermbacter hominis               | 1426   | 0           | RA7                     | genomic DNA |         | plants from alpine grassland, 2970 m elevation             | 1         | 1426     | FALSE   | ncbi_filtered | 36740   |
| JDR05100039_144_1675          | 1450519 | JDR05100039     | Dermbacter hominis 1368 contig00040, whole genome shotgun sequence                        | 10-Jun-14     | 4-Jan-18      | 1       |            | WGS                       | Dermbacter hominis 1368          | 1532   | 0           | 1368                    | genomic DNA |         | blood                                                      | 144       | 1675     | FALSE   | ncbi_filtered | 36740   |
| NR_026271_1_1511              | 36740   | NR_026271       | Dermbacter hominis strain DSM 7083 16S ribosomal RNA, partial sequence                    | 24-Oct-17     | 4-Jan-18      | 1       |            | RefSeq                    | Dermbacter hominis               | 1511   | 2           | DSM 7083                | rRNA        |         |                                                            | 1         | 1511     | TRUE    | ncbi_filtered | 36740   |
| NZ_BCSI01000020_146_1671      | 1349750 | NZ_BCSI01000020 | Dermbacter hominis NBRC 106157, whole genome shotgun sequence                             | 11-Apr-17     | 4-Jan-18      | 1       |            | WGS;STANDARD_DRAFT;RefSeq | Dermbacter hominis NBRC 106157   | 1526   | 0           | NBRC 106157             | genomic DNA |         |                                                            | 146       | 1671     | FALSE   | ncbi_filtered | 36740   |
| AF311398_1_1429               | 36808   | AF311398        | Corynebacterium bovis strain 52 16S ribosomal RNA gene, partial sequence                  | 23-Nov-00     | 4-Jan-18      | 1       |            |                           | Corynebacterium bovis            | 1429   | 0           | 52                      | genomic DNA |         |                                                            | 1         | 1429     | FALSE   | ncbi_filtered | 36808   |
| AF311407_1_1470               | 36808   | AF311407        | Corynebacterium bovis strain 68 16S ribosomal RNA gene, partial sequence                  | 23-Nov-00     | 4-Jan-18      | 1       |            |                           | Corynebacterium bovis            | 1470   | 0           | 68                      | genomic DNA |         |                                                            | 1         | 1470     | FALSE   | ncbi_filtered | 36808   |
| AF311418_1_1470               | 36808   | AF311418        | Corynebacterium bovis strain 140 16S ribosomal RNA gene, partial sequence                 | 23-Nov-00     | 4-Jan-18      | 1       |            |                           | Corynebacterium bovis            | 1470   | 0           | 140                     | genomic DNA |         |                                                            | 1         | 1470     | FALSE   | ncbi_filtered | 36808   |
| AY168882_1_1433               | 36808   | AY168882        | Corynebacterium bovis 16S ribosomal RNA gene, partial sequence                            | 15-Nov-04     | 4-Jan-18      | 1       |            |                           | Corynebacterium bovis            | 1433   | 0           |                         | genomic DNA |         | culture from young individual with purulent conjunctivitis | 1         | 1433     | FALSE   | ncbi_filtered | 36808   |
| NR_037042_1_1445              | 36808   | NR_037042       | Corynebacterium bovis strain Evans 16S ribosomal RNA gene, partial sequence               | 3-Feb-15      | 4-Jan-18      | 1       |            | RefSeq                    | Corynebacterium bovis            | 1445   | 3           | Evans; NCTC 3224        | rRNA        |         |                                                            | 1         | 1445     | TRUE    | ncbi_filtered | 36808   |
| KR995256_1_1324               | 36809   | KR995256        | Mycobacterium abscessus strain WH1001 16S ribosomal RNA gene, partial sequence            | 22-Jun-16     | 4-Jan-18      | 1       |            |                           | Mycobacterium abscessus          | 1324   | 0           | WH1001                  | genomic DNA |         | sputum                                                     | 1         | 1324     | FALSE   | ncbi_filtered | 36809   |
| KR995258_1_1322               | 36809   | KR995258        | Mycobacterium abscessus strain WH834 16S ribosomal RNA gene, partial sequence             | 22-Jun-16     | 4-Jan-18      | 1       |            |                           | Mycobacterium abscessus          | 1322   | 0           | WH834                   | genomic DNA |         | sputum                                                     | 1         | 1322     | FALSE   | ncbi_filtered | 36809   |
| KR995261_1_1321               | 36809   | KR995261        | Mycobacterium abscessus strain WH750 16S ribosomal RNA gene, partial sequence             | 22-Jun-16     | 4-Jan-18      | 1       |            |                           | Mycobacterium abscessus          | 1321   | 0           | WH750                   | genomic DNA |         | sputum                                                     | 1         | 1321     | FALSE   | ncbi_filtered | 36809   |
| KR995262_1_1315               | 36809   | KR995262        | Mycobacterium abscessus strain WH572 16S ribosomal RNA gene, partial sequence             | 22-Jun-16     | 4-Jan-18      | 1       |            |                           | Mycobacterium abscessus          | 1315   | 0           | WH572</                 |             |         |                                                            |           |          |         |               |         |

| seqname                     | tax_id  | accession       | description                                                                                               | modified_date | download_date | version_num | source                                         | keywords                                  | organism                                       | length | ambig_count | strain            | mol_type    | isolate                                            | isolation_source | seq_start | seq_stop | is_type | collection    | species |
|-----------------------------|---------|-----------------|-----------------------------------------------------------------------------------------------------------|---------------|---------------|-------------|------------------------------------------------|-------------------------------------------|------------------------------------------------|--------|-------------|-------------------|-------------|----------------------------------------------------|------------------|-----------|----------|---------|---------------|---------|
| NR_119119_1_1396            | 37637   | NR_119119       | Corynebacterium pseudodiphtheriticum strain CP 103420 16S ribosomal RNA, partial sequence                 | 24-Oct-17     | 4-Jan-18      | 1           | Corynebacterium pseudodiphtheriticum           | RefSeq                                    | Corynebacterium pseudodiphtheriticum           | 1396   | 3           | CIP 103420        | rRNA        |                                                    |                  | 1         | 1396     | TRUE    | ncbi_filtered | 37637   |
| NZ_IAIH01000003_197_1723    | 1121368 | NZ_IAIH01000003 | Corynebacterium pseudodiphtheriticum DSM 44287 O460DRAFT_scaff00000212_C, whole genome shotgun sequence   | 9-Apr-17      | 4-Jan-18      | 1           | Corynebacterium pseudodiphtheriticum DSM 44287 | WGS;IMPROVED_HIGH_QUALITY_DRAFT;RefSeq    | Corynebacterium pseudodiphtheriticum DSM 44287 | 1527   | 0           | DSM 44287         | genomic DNA |                                                    |                  | 197       | 1723     | TRUE    | ncbi_filtered | 37637   |
| AF367977_1_1506             | 37734   | AF367977        | Enterococcus casseliflavus CCM 4869 16S ribosomal RNA gene, partial sequence                              | 16-Aug-02     | 4-Jan-18      | 1           | Enterococcus casseliflavus                     |                                           | Enterococcus casseliflavus                     | 1506   | 0           | CCM 4869          | genomic DNA |                                                    |                  | 1         | 1506     | FALSE   | ncbi_filtered | 37734   |
| KP058539_1_1424             | 37734   | KP058539        | Enterococcus casseliflavus strain SL 10 16S ribosomal RNA gene, partial sequence                          | 25-Feb-15     | 4-Jan-18      | 1           | Enterococcus casseliflavus                     |                                           | Enterococcus casseliflavus                     | 1324   | 0           | SL 10             | genomic DNA | gut                                                |                  | 1         | 1324     | FALSE   | ncbi_filtered | 37734   |
| KT62986_1_1249              | 37734   | KT62986         | Enterococcus casseliflavus strain LZU-59-1 16S ribosomal RNA gene, partial sequence                       | 19-Dec-15     | 4-Jan-18      | 1           | Enterococcus casseliflavus                     |                                           | Enterococcus casseliflavus                     | 1429   | 0           | LZU-59-1          | genomic DNA | contaminated region of the Yellow River in Lanzhou |                  | 1         | 1429     | FALSE   | ncbi_filtered | 37734   |
| KU898940_1_1454             | 37734   | KU898940        | Enterococcus casseliflavus strain 200272 16S ribosomal RNA gene, partial sequence                         | 10-Jul-16     | 4-Jan-18      | 1           | Enterococcus casseliflavus                     |                                           | Enterococcus casseliflavus                     | 1454   | 0           | 200272            | genomic DNA | kernel                                             |                  | 1         | 1454     | FALSE   | ncbi_filtered | 37734   |
| K0078318_1_1442             | 37734   | K0078318        | Enterococcus casseliflavus strain PT1502 16S ribosomal RNA gene, partial sequence                         | 24-May-16     | 4-Jan-18      | 1           | Enterococcus casseliflavus                     |                                           | Enterococcus casseliflavus                     | 1442   | 0           | PT1502            | genomic DNA | tea                                                |                  | 1         | 1442     | FALSE   | ncbi_filtered | 37734   |
| CP024915_487207_488746      | 37921   | CP024915        | Arthrobacter agilis strain UMCV2 chromosome                                                               | 6-Feb-18      | 14-Feb-18     | 1           | Arthrobacter agilis                            |                                           | Arthrobacter agilis                            | 1540   | 0           | UMCV2             | genomic DNA | Zea mays rhizosphere                               |                  | 487207    | 488746   | FALSE   | ncbi_filtered | 37921   |
| EF154241_1_1408             | 37921   | EF154241        | Arthrobacter agilis 16S ribosomal RNA gene, partial sequence                                              | 11-Jan-07     | 4-Jan-18      | 1           | Arthrobacter agilis                            |                                           | Arthrobacter agilis                            | 1408   | 0           | 1                 | genomic DNA | soil                                               |                  | 1         | 1408     | FALSE   | ncbi_filtered | 37921   |
| FR691389_1_1475             | 37921   | FR691389        | Arthrobacter agilis partial 16S rRNA gene, strain R-43938                                                 | 26-Oct-11     | 4-Jan-18      | 1           | Arthrobacter agilis                            |                                           | Arthrobacter agilis                            | 1475   | 0           | R-43938           | genomic DNA |                                                    |                  | 1         | 1475     | FALSE   | ncbi_filtered | 37921   |
| JF505973_1_1281             | 37921   | JF505973        | Arthrobacter agilis strain KNUC9039 16S ribosomal RNA gene, partial sequence                              | 6-Jul-11      | 4-Jan-18      | 1           | Arthrobacter agilis                            |                                           | Arthrobacter agilis                            | 1281   | 0           | KNUC9039          | genomic DNA | concrete structure                                 |                  | 1         | 1281     | FALSE   | ncbi_filtered | 37921   |
| KJ812397_1_1456             | 37921   | KJ812397        | Arthrobacter agilis strain OAct554 16S ribosomal RNA gene, partial sequence                               | 30-Aug-14     | 4-Jan-18      | 1           | Arthrobacter agilis                            |                                           | Arthrobacter agilis                            | 1456   | 0           | OAct554           | genomic DNA | soil                                               |                  | 1         | 1456     | FALSE   | ncbi_filtered | 37921   |
| EU554443_1_1465             | 37923   | EU554443        | Kocuria kristinae strain Ag17 16S ribosomal RNA gene, partial sequence                                    | 23-Apr-08     | 4-Jan-18      | 1           | Kocuria kristinae                              |                                           | Kocuria kristinae                              | 1465   | 0           | Ag17              | genomic DNA | larval gut                                         |                  | 1         | 1465     | FALSE   | ncbi_filtered | 37923   |
| HQ808734_1_1291             | 37923   | HQ808734        | Kocuria kristinae strain F75031 16S ribosomal RNA gene, partial sequence                                  | 7-Feb-11      | 4-Jan-18      | 1           | Kocuria kristinae                              |                                           | Kocuria kristinae                              | 1291   | 0           | F75031            | genomic DNA |                                                    |                  | 1         | 1291     | FALSE   | ncbi_filtered | 37923   |
| KF054748_1_1475             | 37923   | KF054748        | Kocuria kristinae strain IARH-HHS2-64 16S ribosomal RNA gene, partial sequence                            | 8-Dec-15      | 4-Jan-18      | 1           | Kocuria kristinae                              |                                           | Kocuria kristinae                              | 1475   | 0           | IARH-HHS2-64      | genomic DNA | wheat rhizosphere                                  |                  | 1         | 1475     | FALSE   | ncbi_filtered | 37923   |
| L7600550_1_1264             | 37923   | L7600550        | Kocuria kristinae partial 16S rRNA gene, strain S222                                                      | 10-Aug-16     | 4-Jan-18      | 1           | Kocuria kristinae                              |                                           | Kocuria kristinae                              | 1264   | 0           | S222              | genomic DNA | sea water                                          |                  | 1         | 1264     | FALSE   | ncbi_filtered | 37923   |
| NZ_BCSM01000028_182_1020    | 1349768 | NZ_BCSM01000028 | Kocuria kristinae NBRC 15354, whole genome shotgun sequence                                               | 22-Oct-17     | 4-Jan-18      | 1           | Kocuria kristinae NBRC 15354                   | WGS;STANDARD_DRAFT;RefSeq                 | Kocuria kristinae NBRC 15354                   | 1539   | 0           | NBRC 15354        | genomic DNA |                                                    |                  | 182       | 1020     | TRUE    | ncbi_filtered | 37923   |
| AB359401_1_1481             | 38284   | AB359401        | Corynebacterium accolens gene for 16S rRNA, partial sequence, strain: TBS-12                              | 21-Feb-08     | 4-Jan-18      | 1           | Corynebacterium accolens                       |                                           | Corynebacterium accolens                       | 1481   | 2           | TBS-12            | genomic DNA | human conjunctiva                                  |                  | 1         | 1481     | FALSE   | ncbi_filtered | 38284   |
| GQ338419_1_1445             | 38284   | GQ338419        | Corynebacterium accolens strain CHL-821438 16S ribosomal RNA gene, partial sequence                       | 3-Mar-10      | 4-Jan-18      | 1           | Corynebacterium accolens                       |                                           | Corynebacterium accolens                       | 1445   | 0           | CHL-821438        | genomic DNA |                                                    |                  | 1         | 1445     | FALSE   | ncbi_filtered | 38284   |
| KC429646_1_1484             | 38284   | KC429646        | Corynebacterium accolens strain XFB-2 16S ribosomal RNA gene, partial sequence                            | 7-Dec-16      | 4-Jan-18      | 1           | Corynebacterium accolens                       |                                           | Corynebacterium accolens                       | 1484   | 0           | XFB-2             | genomic DNA | fresco surface                                     |                  | 1         | 1484     | FALSE   | ncbi_filtered | 38284   |
| NZ_GG666997_3843_5370       | 525260  | NZ_GG666997     | Corynebacterium accolens ATCC 49725 SCAFFOLD5, whole genome shotgun sequence                              | 7-Apr-17      | 4-Jan-18      | 1           | Corynebacterium accolens ATCC 49725            | WGS;RefSeq                                | Corynebacterium accolens ATCC 49725            | 1528   | 0           | ATCC 49725        | genomic DNA | biological product [ENVO:02000043]                 |                  | 3843      | 5370     | TRUE    | ncbi_filtered | 38284   |
| X80500_1_1300               | 38284   | X80500          | Corynebacterium accolens 16S rDNA                                                                         | 9-Feb-95      | 4-Jan-18      | 1           | Corynebacterium accolens                       | 16S ribosomal RNA;16S rRNA gene           | Corynebacterium accolens                       | 1393   | 2           | 287797+ATCC 49727 | genomic DNA |                                                    |                  | 1         | 1393     | FALSE   | ncbi_filtered | 38284   |
| KT98955_1_1429              | 144183  | KT98955         | Corynebacterium afermentans subsp. afermentans strain CIP 103499 16S ribosomal RNA gene, partial sequence | 26-Mar-16     | 4-Jan-18      | 1           | Corynebacterium afermentans subsp. afermentans |                                           | Corynebacterium afermentans subsp. afermentans | 1429   | 0           | CIP 103499        | genomic DNA | marine grass                                       |                  | 1         | 1429     | TRUE    | ncbi_filtered | 38286   |
| NR_026214_1_1236            | 38286   | NR_026214       | Corynebacterium afermentans strain CIP 103499 16S ribosomal RNA, partial sequence                         | 24-Oct-17     | 4-Jan-18      | 1           | Corynebacterium afermentans                    | RefSeq;small subunit rRNA                 | Corynebacterium afermentans                    | 1236   | 5           | CIP 103499        | rRNA        |                                                    |                  | 1         | 1236     | TRUE    | ncbi_filtered | 38286   |
| NR_044865_1_1325            | 144184  | NR_044865       | Corynebacterium afermentans subsp. lipophilum strain T18502 16S ribosomal RNA, partial sequence           | 24-Oct-17     | 4-Jan-18      | 1           | Corynebacterium afermentans subsp. lipophilum  | RefSeq                                    | Corynebacterium afermentans subsp. lipophilum  | 1325   | 6           | T18502            | rRNA        |                                                    |                  | 1         | 1325     | TRUE    | ncbi_filtered | 38286   |
| NZ_FTMH01000041_364_1891    | 38286   | NZ_FTMH01000041 | Corynebacterium afermentans strain DSM 44280, whole genome shotgun sequence                               | 16-Apr-17     | 4-Jan-18      | 1           | Corynebacterium afermentans                    | WGS;RefSeq                                | Corynebacterium afermentans                    | 1528   | 0           | DSM 44280         | genomic DNA |                                                    |                  | 364       | 1891     | TRUE    | ncbi_filtered | 38286   |
| X81874_1_1368               | 38286   | X81874          | Corynebacterium afermentans 16S rRNA, strain DMMAZ 545                                                    | 9-Jan-04      | 4-Jan-18      | 2           | Corynebacterium afermentans                    | 16S ribosomal RNA;16S rRNA gene;rRNA gene | Corynebacterium afermentans                    | 1368   | 3           | DMMAZ 545         | genomic DNA |                                                    |                  | 1         | 1368     | FALSE   | ncbi_filtered | 38286   |
| AJ439347_1_1513             | 38287   | AJ439347        | Corynebacterium fastidiosum partial 16S rRNA gene, strain CIP103808                                       | 28-Jul-04     | 4-Jan-18      | 1           | Corynebacterium fastidiosum                    | 16S ribosomal RNA;16S rRNA gene           | Corynebacterium fastidiosum                    | 1513   | 0           | CIP103808         | genomic DNA |                                                    |                  | 1         | 1513     | FALSE   | ncbi_filtered | 38287   |
| X84245_1_1491               | 38287   | X84245          | Corynebacterium fastidiosum 16S rRNA gene, strain CIP 103808                                              | 9-Jan-04      | 4-Jan-18      | 1           | Corynebacterium fastidiosum                    | 16S rDNA;16S ribosomal RNA                | Corynebacterium fastidiosum                    | 1491   | 3           | CIP 103808        | genomic DNA |                                                    |                  | 1         | 1491     | FALSE   | ncbi_filtered | 38287   |
| HM205109_1_1513             | 38288   | HM205109        | Corynebacterium genitalium strain CCLG 59401 16S ribosomal RNA gene, partial sequence                     | 15-Jun-10     | 4-Jan-18      | 1           | Corynebacterium genitalium                     |                                           | Corynebacterium genitalium                     | 1513   | 0           | CCLG 59401        | genomic DNA | unspecified industry                               |                  | 1         | 1513     | FALSE   | ncbi_filtered | 38288   |
| NZ_CM000961_1019758_1021285 | 585529  | NZ_CM000961     | Corynebacterium genitalium ATCC 33030 chromosome, whole genome shotgun sequence                           | 17-Apr-17     | 4-Jan-18      | 1           | Corynebacterium genitalium ATCC 33030          | WGS;NONCONTIGUOUS_FINISHED;RefSeq         | Corynebacterium genitalium ATCC 33030          | 1528   | 0           | ATCC 33030        | genomic DNA | biological product [ENVO:02000043]                 |                  | 1019758   | 1021285  | FALSE   | ncbi_filtered | 38288   |
| NZ_CM000961_2310351_2311881 | 585529  | NZ_CM000961     | Corynebacterium genitalium ATCC 33030 chromosome, whole genome shotgun sequence                           | 17-Apr-17     | 4-Jan-18      | 1           | Corynebacterium genitalium ATCC 33030          | WGS;NONCONTIGUOUS_FINISHED;RefSeq         | Corynebacterium genitalium ATCC 33030          | 1531   | 0           | ATCC 33030        | genomic DNA | biological product [ENVO:02000043]                 |                  | 2310351   | 2311881  | FALSE   | ncbi_filtered | 38288   |
| NZ_CM000961_693143_694670   | 585529  | NZ_CM000961     | Corynebacterium genitalium ATCC 33030 chromosome, whole genome shotgun sequence                           | 17-Apr-17     | 4-Jan-18      | 1           | Corynebacterium genitalium ATCC 33030          | WGS;NONCONTIGUOUS_FINISHED;RefSeq         | Corynebacterium genitalium ATCC 33030          | 1528   | 0           | ATCC 33030        | genomic DNA | biological product [ENVO:02000043]                 |                  | 693143    | 694670   | FALSE   | ncbi_filtered | 38288   |
| X84253_1_1332               | 585529  | X84253          | Corynebacterium genitalium 16S rRNA gene, strain NCTC 11859                                               | 9-Jan-04      | 4-Jan-18      | 1           | Corynebacterium genitalium ATCC 33030          | 16S rDNA;16S ribosomal RNA                | Corynebacterium genitalium ATCC 33030          | 1392   | 4           | NCTC 11859        | genomic DNA |                                                    |                  | 1         | 1392     | FALSE   | ncbi_filtered | 38288   |
| JQ963332_1_1344             | 38289   | JQ963332        | Corynebacterium jeikeium strain MK-4 16S ribosomal RNA gene, partial sequence                             | 18-Jul-12     | 4-Jan-18      | 1           | Corynebacterium jeikeium                       |                                           | Corynebacterium jeikeium                       | 1344   | 0           | MK-4              | genomic DNA | contaminated soil                                  |                  | 1         | 1344     | FALSE   | ncbi_filtered | 38289   |
| NZ_FMTZ01000002_420_1958    | 38289   | NZ_FMTZ01000002 | Corynebacterium jeikeium isolate BVI, whole genome shotgun sequence                                       | 30-Oct-16     | 4-Jan-18      | 1           | Corynebacterium jeikeium                       | WGS;RefSeq                                | Corynebacterium jeikeium                       | 1539   | 0           |                   | genomic DNA | BVI vaginal fluid                                  |                  | 420       | 1958     | FALSE   | ncbi_filtered | 38289   |
| NZ_JFCF01000023_86636_88170 | 38289   | NZ_JFCF01000023 | Corynebacterium jeikeium strain CJ14566 19S, whole genome shotgun sequence                                | 2-Apr-17      | 4-Jan-18      | 1           | Corynebacterium jeikeium                       | WGS;RefSeq                                | Corynebacterium jeikeium                       | 1535   | 0           | CJ14566           | genomic DNA |                                                    |                  | 86636     | 88170    | FALSE   | ncbi_filtered | 38289   |
| NZ_JFCH01000010_418_1951    | 38289   | NZ_JFCH01000010 | Corynebacterium jeikeium strain CJ47444 240, whole genome shotgun sequence                                | 2-Apr-17      | 4-Jan-18      | 1           | Corynebacterium jeikeium                       | WGS;RefSeq                                | Corynebacterium jeikeium                       | 1534   | 0           | CJ47444           | genomic DNA | pleural fluid                                      |                  | 418       | 1951     | FALSE   | ncbi_filtered | 38289   |
| NZ_JFCR01000004_1_1538      | 38289   | NZ_JFCR01000004 | Corynebacterium jeikeium strain CJ30952 136, whole genome shotgun sequence                                | 2-Apr-17      | 4-Jan-18      | 1           | Corynebacterium jeikeium                       | WGS;RefSeq                                | Corynebacterium jeikeium                       | 1538   | 0           | CJ30952           | genomic DNA | vertebral disk space                               |                  | 1         | 1538     | FALSE   | ncbi_filtered | 38289   |
| AB359390_1_1479             | 38290   | AB359390        | Corynebacterium maginleyi gene for 16S rRNA, partial sequence, strain: TBS-03                             | 21-Feb-08     | 4-Jan-18      | 1           | Corynebacterium maginleyi                      |                                           | Corynebacterium maginleyi                      | 1479   | 2           | TBS-01            | genomic DNA | human conjunctiva                                  |                  | 1         | 1479     | FALSE   | ncbi_filtered | 38290   |
| AF490772_1_1302             | 38290   | AF490772        | Corynebacterium maginleyi 16S ribosomal RNA gene, partial sequence                                        | 17-Dec-02     | 4-Jan-18      | 1           | Corynebacterium maginleyi                      |                                           | Corynebacterium maginleyi                      | 1302   | 0           |                   | genomic DNA |                                                    |                  | 1         | 1302     | FALSE   | ncbi_filtered | 38290   |
| NR_042138_1_1505            | 38290   | NR_042138       | Corynebacterium maginleyi strain JCL-2 16S ribosomal RNA gene, partial sequence                           | 3-Feb-15      | 4-Jan-18      | 1           | Corynebacterium maginleyi                      | RefSeq                                    | Corynebacterium maginleyi                      | 1505   | 0           | JCL-2             | rRNA        |                                                    |                  | 1         | 1505     | TRUE    | ncbi_filtered | 38290   |
| X80499_1_1393               | 38290   | X80499          | Corynebacterium maginleyi 16S rDNA                                                                        | 9-Feb-95      | 4-Jan-18      | 1           | Corynebacterium maginleyi                      | 16S ribosomal RNA;16S rRNA gene           | Corynebacterium maginleyi                      | 1393   | 2           | 1040997+CDC JCL2  | genomic DNA |                                                    |                  | 1         | 1393     | FALSE   | ncbi_filtered | 38290   |
| LN831312_1_1507             | 38301   | LN831312        | Corynebacterium minutissimum partial 16S rRNA gene, strain DSM 20651, clone 1                             | 26-Mar-15     | 4-Jan-18      | 1           | Corynebacterium minutissimum                   |                                           | Corynebacterium minutissimum                   | 1507   | 0           | DSM 20651         | genomic DNA |                                                    |                  | 1         | 1507     | TRUE    | ncbi_filtered | 38301   |
| LN831313_1_1506             | 38301   | LN831313        | Corynebacterium minutissimum partial 16S rRNA gene, strain DSM 20651, clone 2                             | 26-Mar-15     | 4-Jan-18      | 1           | Corynebacterium minutissimum                   |                                           | Corynebacterium minutissimum                   | 1506   | 0           | DSM 20651         | genomic DNA |                                                    |                  | 1         | 1506     | TRUE    | ncbi_filtered | 38301   |
| NZ_BRCR01000029_23_1549     | 1223512 | NZ_BRCR01000029 | Corynebacterium minutissimum NBRC 15361, whole genome shotgun sequence                                    | 11-Apr-17     | 4-Jan-18      | 1           | Corynebacterium minutissimum NBRC 15361        | WGS;STANDARD_DRAFT;RefSeq                 | Corynebacterium minutissimum NBRC 15361        | 1527   | 0           | NBRC 15361        | genomic DNA |                                                    |                  | 23        | 1549     | TRUE    | ncbi_filtered | 38301   |
| NZ_JSEF01000027_23_1551     | 38301   | NZ_JSEF01000027 | Corynebacterium minutissimum strain ATCC 23348 Unordered_Contig_027, whole genome shotgun sequence        | 10-Apr-17     | 4-Jan-18      | 1           | Corynebacterium minutissimum                   | WGS;RefSeq                                | Corynebacterium minutissimum                   | 1529   | 0           | ATCC 23348        | genomic DNA | skin                                               |                  | 23        | 1551     | TRUE    | ncbi_filtered | 38301   |
| NZ_LAYQ01000017_4782_6309   | 38301   | NZ_LAYQ01000017 | Corynebacterium minutissimum strain 1941 Contig_17, whole genome shotgun sequence                         | 10-Apr-17     | 4-Jan-18      | 1           | Corynebacterium minutissimum                   | WGS;RefSeq                                | Corynebacterium minutissimum                   | 1528   | 0           | 1941              | genomic DNA |                                                    |                  | 4782      | 6309     | FALSE   | ncbi_filtered | 38301   |
| NR_030708_1_1477            | 38302   | NR_030708       | Corynebacterium mycetoides strain NCTC 9864 16S ribosomal RNA gene, partial sequence                      | 3-Feb-15      | 4-Jan-18      | 1           | Corynebacterium mycetoides                     | RefSeq                                    | Corynebacterium mycetoides                     | 1477   | 1           | NCTC 9864         | rRNA        |                                                    |                  | 1         | 1477     | TRUE    | ncbi_filtered | 38302   |
| NR_119140_1_1396            |         |                 |                                                                                                           |               |               |             |                                                |                                           |                                                |        |             |                   |             |                                                    |                  |           |          |         |               |         |

| seqname                       | tax_id  | accession       | description                                                                                      | modified_date | download_date | version_num | source                               | keywords                      | organism                             | length | ambig_count | strain            | mol_type    | isolate   | isolation_source                                                                           | seq_start              | seq_stop | is_type | collection    | species       |       |
|-------------------------------|---------|-----------------|--------------------------------------------------------------------------------------------------|---------------|---------------|-------------|--------------------------------------|-------------------------------|--------------------------------------|--------|-------------|-------------------|-------------|-----------|--------------------------------------------------------------------------------------------|------------------------|----------|---------|---------------|---------------|-------|
| NR_117147_1_1524              | 39482   | NR_117147       | [Eubacterium] contortum strain DSM 3982 16S ribosomal RNA gene, partial sequence                 | 3-Feb-15      | 4-Jan-18      | 1           | Faecalcatena contorta                | RefSeq                        | Faecalcatena contorta                | 1524   | 0           | DSM 3982          | rRNA        |           |                                                                                            | 1                      | 1524     | TRUE    | ncbi_filtered | 39482         |       |
| NZ_CZU01000015_49_1589        | 39482   | NZ_CZU01000015  | Faecalcatena contorta strain 27895TDY5834876, whole genome shotgun sequence                      | 31-Mar-17     | 4-Jan-18      | 1           | Faecalcatena contorta                | WGS;RefSeq                    | Faecalcatena contorta                | 1541   | 0           | 27895TDY5834876   | genomic DNA |           | faeces                                                                                     | 49                     | 1589     | FALSE   | ncbi_filtered | 39482         |       |
| JNS83454_1_1453               | 39485   | JNS83454        | [Eubacterium] eligens strain 142 16S ribosomal RNA gene, partial sequence                        | 6-Mar-12      | 4-Jan-18      | 1           | [Eubacterium] eligens                |                               | [Eubacterium] eligens                | 1453   | 3           | 142               | genomic DNA |           | feces                                                                                      | 1                      | 1453     | FALSE   | ncbi_filtered | 39485         |       |
| NC_012778_15553_17092         | 515620  | NC_012778       | [Eubacterium] eligens ATCC 27750, complete genome                                                | 28-Aug-17     | 4-Jan-18      | 1           | [Eubacterium] eligens ATCC 27750     | RefSeq                        | [Eubacterium] eligens ATCC 27750     | 1540   | 0           | ATCC 27750        | genomic DNA |           |                                                                                            | 15553                  | 17092    | TRUE    | ncbi_filtered | 39485         |       |
| NC_012778_872324_873773       | 515620  | NC_012778       | [Eubacterium] eligens ATCC 27750, complete genome                                                | 28-Aug-17     | 4-Jan-18      | 1           | [Eubacterium] eligens ATCC 27750     | RefSeq                        | [Eubacterium] eligens ATCC 27750     | 1540   | 0           | ATCC 27750        | genomic DNA |           |                                                                                            | 872324                 | 873773   | TRUE    | ncbi_filtered | 39485         |       |
| NZ_CBU01000013_1948_3382      | 39485   | NZ_CBU01000013  | [Eubacterium] eligens strain 27895TDY5834875, whole genome shotgun sequence                      | 11-Apr-17     | 4-Jan-18      | 1           | [Eubacterium] eligens                | WGS;RefSeq                    | [Eubacterium] eligens                | 1435   | 0           | 27895TDY5834875   | genomic DNA |           | faeces                                                                                     | 1948                   | 3382     | FALSE   | ncbi_filtered | 39485         |       |
| NZ_CZBV01000019_3421_4951     | 39485   | NZ_CZBV01000019 | [Eubacterium] eligens strain 27895TDY5834878, whole genome shotgun sequence                      | 11-Apr-17     | 4-Jan-18      | 1           | [Eubacterium] eligens                | WGS;RefSeq                    | [Eubacterium] eligens                | 1540   | 0           | 27895TDY5834878   | genomic DNA |           | faeces                                                                                     | 3412                   | 4951     | FALSE   | ncbi_filtered | 39485         |       |
| JN093132_1_1351               | 39486   | JN093132        | Dorea formicigenerans strain SaLH1-10 16S ribosomal RNA gene, partial sequence                   | 12-Aug-11     | 4-Jan-18      | 2           | Dorea formicigenerans                |                               | Dorea formicigenerans                | 1351   | 0           | SaLH1-10          | genomic DNA |           |                                                                                            | 1                      | 1351     | FALSE   | ncbi_filtered | 39486         |       |
| NZ_AA02000006_102294_103835   | 41461   | NZ_AA02000006   | Dorea formicigenerans ATCC 27755 D_ formicigenerans-3.0.1_C0nt394, whole genome shotgun sequence | 7-Apr-17      | 4-Jan-18      | 1           | Dorea formicigenerans ATCC 27755     | WGS;RefSeq                    | Dorea formicigenerans ATCC 27755     | 1542   | 0           | ATCC 27755        | genomic DNA |           | biological product [ENVO:02000043]                                                         | 102294                 | 103835   | TRUE    | ncbi_filtered | 39486         |       |
| NZ_AA02000014_354455_355996   | 41461   | NZ_AA02000014   | Dorea formicigenerans ATCC 27755 D_ formicigenerans-3.0.1_C0nt390, whole genome shotgun sequence | 7-Apr-17      | 4-Jan-18      | 1           | Dorea formicigenerans ATCC 27755     | WGS;RefSeq                    | Dorea formicigenerans ATCC 27755     | 1542   | 0           | ATCC 27755        | genomic DNA |           | biological product [ENVO:02000043]                                                         | 354455                 | 355996   | TRUE    | ncbi_filtered | 39486         |       |
| NZ_HI126530_244_1785          | 742765  | NZ_HI126530     | Dorea formicigenerans 4_6_53AFAA supercont1.44, whole genome shotgun sequence                    | 7-Apr-17      | 4-Jan-18      | 1           | Dorea formicigenerans 4_6_53AFAA     | WGS;HIGH_QUALITY_DRAFT;RefSeq | Dorea formicigenerans 4_6_53AFAA     | 1542   | 0           | 4_6_53AFAA        | genomic DNA |           | biological product [ENVO:02000043]                                                         | 244                    | 1785     | FALSE   | ncbi_filtered | 39486         |       |
| NZ_CY01000009_505_2044        | 39488   | NZ_CY01000009   | [Eubacterium] hallii strain 27895TDY5834966, whole genome shotgun sequence                       | 11-Apr-17     | 4-Jan-18      | 1           | [Eubacterium] hallii                 | WGS;RefSeq                    | [Eubacterium] hallii                 | 1540   | 0           | 27895TDY5834966   | genomic DNA |           |                                                                                            | 505                    | 2044     | FALSE   | ncbi_filtered | 39488         |       |
| NZ_L1907978_10735_12275       | 39488   | NZ_L1907978     | [Eubacterium] hallii isolate EH1 genome assembly, chromosome: I                                  | 23-Sep-17     | 4-Jan-18      | 1           | [Eubacterium] hallii                 | RefSeq                        | [Eubacterium] hallii                 | 1541   | 0           |                   | genomic DNA | EH1       |                                                                                            | 10735                  | 12275    | FALSE   | ncbi_filtered | 39488         |       |
| NZ_L1907978_1100478_1102017   | 39488   | NZ_L1907978     | [Eubacterium] hallii isolate EH1 genome assembly, chromosome: I                                  | 23-Sep-17     | 4-Jan-18      | 1           | [Eubacterium] hallii                 | RefSeq                        | [Eubacterium] hallii                 | 1540   | 0           |                   | genomic DNA | EH1       |                                                                                            | 1100478                | 1102017  | FALSE   | ncbi_filtered | 39488         |       |
| NZ_L1907978_166589_168128     | 39488   | NZ_L1907978     | [Eubacterium] hallii isolate EH1 genome assembly, chromosome: I                                  | 23-Sep-17     | 4-Jan-18      | 1           | [Eubacterium] hallii                 | RefSeq                        | [Eubacterium] hallii                 | 1540   | 0           |                   | genomic DNA | EH1       |                                                                                            | 166589                 | 168128   | FALSE   | ncbi_filtered | 39488         |       |
| NZ_L1907978_739431_740969     | 39488   | NZ_L1907978     | [Eubacterium] hallii isolate EH1 genome assembly, chromosome: I                                  | 23-Sep-17     | 4-Jan-18      | 1           | [Eubacterium] hallii                 | RefSeq                        | [Eubacterium] hallii                 | 1539   | 0           |                   | genomic DNA | EH1       |                                                                                            | 739431                 | 740969   | FALSE   | ncbi_filtered | 39488         |       |
| A011522_1_1414                | 39490   | A011522         | Eubacterium ramulus 16S rRNA gene                                                                | 30-Sep-00     | 4-Jan-18      | 1           | Eubacterium ramulus                  |                               | Eubacterium ramulus                  | 1414   | 1           |                   | genomic DNA | Human gut |                                                                                            | 1                      | 1414     | FALSE   | ncbi_filtered | 39490         |       |
| NZ_CY01000009_1155_2696       | 39490   | NZ_CY01000009   | Eubacterium ramulus strain 27895TDY5608891, whole genome shotgun sequence                        | 11-Apr-17     | 4-Jan-18      | 1           | Eubacterium ramulus                  | WGS;RefSeq                    | Eubacterium ramulus                  | 1542   | 0           | 27895TDY5608891   | genomic DNA |           | faeces                                                                                     | 1155                   | 2696     | FALSE   | ncbi_filtered | 39490         |       |
| NZ_K271105_4_1458             | 1256908 | NZ_K271105      | Eubacterium ramulus ATCC 29099 Scaffold1475, whole genome shotgun sequence                       | 9-Apr-17      | 4-Jan-18      | 1           | Eubacterium ramulus ATCC 29099       | WGS;HIGH_QUALITY_DRAFT;RefSeq | Eubacterium ramulus ATCC 29099       | 1455   | 0           | ATCC 29099        | genomic DNA |           | gastrointestinal tract                                                                     | 4                      | 1458     | TRUE    | ncbi_filtered | 39490         |       |
| AY169428_1_1492               | 39491   | AY169428        | Eubacterium rectale 16S ribosomal RNA gene, partial sequence                                     | 4-Apr-03      | 4-Jan-18      | 1           | [Eubacterium] rectale                |                               | [Eubacterium] rectale                | 1492   | 0           |                   | genomic DNA |           | low temperature anaerobic enrichment of a Greenland ice core sample from 3042 meters depth | 1                      | 1492     | FALSE   | ncbi_filtered | 39491         |       |
| AY804151_1_1496               | 39491   | AY804151        | Eubacterium rectale strain S2542/7 16S ribosomal RNA gene, partial sequence                      | 2-Oct-06      | 4-Jan-18      | 1           | [Eubacterium] rectale                |                               | [Eubacterium] rectale                | 1496   | 0           | S2542/7           | genomic DNA |           |                                                                                            | 1                      | 1496     | FALSE   | ncbi_filtered | 39491         |       |
| NC_012781_1425067_1426610     | 515619  | NC_012781       | [Eubacterium] rectale ATCC 33656, complete genome                                                | 28-Aug-17     | 4-Jan-18      | 1           | [Eubacterium] rectale ATCC 33656     | RefSeq                        | [Eubacterium] rectale ATCC 33656     | 1544   | 0           | ATCC 33656        | genomic DNA |           |                                                                                            | 1425067                | 1426610  | TRUE    | ncbi_filtered | 39491         |       |
| NC_012781_2162758_2164301     | 515619  | NC_012781       | [Eubacterium] rectale ATCC 33656, complete genome                                                | 28-Aug-17     | 4-Jan-18      | 1           | [Eubacterium] rectale ATCC 33656     | RefSeq                        | [Eubacterium] rectale ATCC 33656     | 1544   | 0           | ATCC 33656        | genomic DNA |           |                                                                                            | 2162758                | 2164301  | TRUE    | ncbi_filtered | 39491         |       |
| ABCA0300019_5787_7283         | 428128  | ABCA0300019     | [Eubacterium] siraenum DSM 15702 E_3siraenum-3.0.1_C0nt498, whole genome shotgun sequence        | 4-Aug-12      | 4-Jan-18      | 1           | [Eubacterium] siraenum DSM 15702     | WGS                           | [Eubacterium] siraenum DSM 15702     | 1497   | 0           | DSM 15702         | genomic DNA |           |                                                                                            | 5787                   | 7283     | TRUE    | ncbi_filtered | 39492         |       |
| EU266550_1_1431               | 657319  | EU266550        | Eubacterium siraenum strain 70/3 16S ribosomal RNA gene, partial sequence                        | 1-Dec-08      | 4-Jan-18      | 1           | [Eubacterium] siraenum 70/3          |                               | [Eubacterium] siraenum 70/3          | 1431   | 2           | 70/3              | genomic DNA |           |                                                                                            | 1                      | 1431     | FALSE   | ncbi_filtered | 39492         |       |
| FP929059_295678_2959714       | 717961  | FP929059        | Eubacterium siraenum V105c8a draft genome                                                        | 27-Feb-15     | 4-Jan-18      | 1           | [Eubacterium] siraenum V105c8a       |                               | [Eubacterium] siraenum V105c8a       | 1497   | 0           | V105c8a           | genomic DNA |           |                                                                                            | 295678                 | 2959714  | FALSE   | ncbi_filtered | 39492         |       |
| NR_118679_1_1453              | 39492   | NR_118679       | [Eubacterium] siraenum strain ATCC 29066 16S ribosomal RNA gene, partial sequence                | 3-Feb-15      | 4-Jan-18      | 1           | [Eubacterium] siraenum               | RefSeq                        | [Eubacterium] siraenum               | 1453   | 13          | ATCC 29066        | rRNA        |           |                                                                                            | 1                      | 1453     | TRUE    | ncbi_filtered | 39492         |       |
| NZ_D5499538_60079_61596       | 428128  | NZ_D5499538     | [Eubacterium] siraenum DSM 15702 Scfid_03_30, whole genome shotgun sequence                      | 7-Apr-17      | 4-Jan-18      | 1           | [Eubacterium] siraenum DSM 15702     | WGS;RefSeq                    | [Eubacterium] siraenum DSM 15702     | 1518   | 0           | DSM 15702         | genomic DNA |           | biological product [ENVO:02000043]                                                         | 60079                  | 61596    | TRUE    | ncbi_filtered | 39492         |       |
| AJ289160_1_1476               | 126346  | AJ289160        | Cellvibrio mixtus subsp. mixtus partial 16S rRNA gene, strain ACM 2603                           | 6-Feb-01      | 4-Jan-18      | 1           | Cellvibrio mixtus subsp. mixtus      |                               | Cellvibrio mixtus subsp. mixtus      | 1476   | 1           | ACM 2603          | genomic DNA |           |                                                                                            | 1                      | 1476     | FALSE   | ncbi_filtered | 39650         |       |
| NR_041884_1_1494              | 39650   | NR_041884       | Cellvibrio mixtus strain ACM 2601 16S ribosomal RNA gene, partial sequence                       | 3-Feb-15      | 4-Jan-18      | 1           | Cellvibrio mixtus                    | RefSeq                        | Cellvibrio mixtus                    | 1494   | 0           | ACM 2601          | rRNA        |           |                                                                                            | 1                      | 1494     | TRUE    | ncbi_filtered | 39650         |       |
| NZ_ALB01000125_239_1778       | 1209072 | NZ_ALB01000125  | Cellvibrio mixtus subsp. mixtus J3-8 Scaffold25_1, whole genome shotgun sequence                 | 17-Apr-17     | 4-Jan-18      | 1           | Cellvibrio mixtus subsp. mixtus J3-8 | WGS;RefSeq                    | Cellvibrio mixtus subsp. mixtus J3-8 | 1540   | 0           | J3-8              | genomic DNA |           |                                                                                            | 239                    | 1778     | FALSE   | ncbi_filtered | 39650         |       |
| NZ_NH01000001_1797808_1799347 | 39650   | NZ_NH01000001   | Cellvibrio mixtus strain PSB8022 contig01, whole genome shotgun sequence                         | 27-Aug-17     | 4-Jan-18      | 1           | Cellvibrio mixtus                    | WGS;RefSeq                    | Cellvibrio mixtus                    | 1540   | 0           | PSB8022           | genomic DNA |           | Freshwater Pond                                                                            | 1797808                | 1799347  | FALSE   | ncbi_filtered | 39650         |       |
| CP020566_138961_140529        | 39777   | CP020566        | Veillonella atypica strain OK5, complete genome                                                  | 10-Apr-17     | 4-Jan-18      | 1           | Veillonella atypica                  |                               | Veillonella atypica                  | 1569   | 0           | OK5               | genomic DNA |           |                                                                                            | 138961                 | 140529   | FALSE   | ncbi_filtered | 39777         |       |
| GU561412_1_1445               | 39777   | GU561412        | Veillonella atypica strain MTO13 16S ribosomal RNA gene, partial sequence                        | 13-Mar-10     | 4-Jan-18      | 1           | Veillonella atypica                  |                               | Veillonella atypica                  | 1445   | 0           | MTO13             | genomic DNA |           | oral cavity                                                                                | 1                      | 1445     | FALSE   | ncbi_filtered | 39777         |       |
| NR_115354_1_1498              | 39777   | NR_115354       | Veillonella atypica strain KON 16S ribosomal RNA gene, partial sequence                          | 3-Feb-15      | 4-Jan-18      | 1           | Veillonella atypica                  | RefSeq                        | Veillonella atypica                  | 1498   | 2           | KON               | rRNA        |           |                                                                                            | 1                      | 1498     | TRUE    | ncbi_filtered | 39777         |       |
| NR_119170_1_1513              | 39777   | NR_119170       | Veillonella atypica strain KON 16S ribosomal RNA gene, partial sequence                          | 24-Oct-17     | 4-Jan-18      | 1           | Veillonella atypica                  | RefSeq                        | Veillonella atypica                  | 1513   | 5           | KON               | rRNA        |           |                                                                                            | 1                      | 1513     | TRUE    | ncbi_filtered | 39777         |       |
| NZ_AED50100059_32_1600        | 866778  | NZ_AED50100059  | Veillonella atypica ACS-134-V-Co7a contig0005, whole genome shotgun sequence                     | 15-Nov-17     | 4-Jan-18      | 1           | Veillonella atypica ACS-134-V-Co7a   | WGS;HIGH_QUALITY_DRAFT;RefSeq | Veillonella atypica ACS-134-V-Co7a   | 1569   | 0           | ACS-134-V-Co7a    | genomic DNA |           | biological product [ENVO:02000043]                                                         | 32                     | 1600     | FALSE   | ncbi_filtered | 39777         |       |
| GQ422726_1_1540               | 39778   | GQ422726        | Veillonella dispar clone X031 16S ribosomal RNA gene, partial sequence                           | 14-Sep-09     | 4-Jan-18      | 1           | Veillonella dispar                   | ENV                           | Veillonella dispar                   | 1540   | 0           |                   | genomic DNA |           | dental plaque                                                                              | 1                      | 1540     | FALSE   | ncbi_filtered | 39778         |       |
| GU561411_1_1451               | 39778   | GU561411        | Veillonella dispar strain MTO11 16S ribosomal RNA gene, partial sequence                         | 13-Mar-10     | 4-Jan-18      | 1           | Veillonella dispar                   |                               | Veillonella dispar                   | 1451   | 0           | MTO11             | genomic DNA |           | oral cavity                                                                                | 1                      | 1451     | FALSE   | ncbi_filtered | 39778         |       |
| KO096311_1_1488               | 39778   | KO096311        | Veillonella dispar culture-collection KCOM:2618 16S ribosomal RNA gene, partial sequence         | 26-Dec-16     | 4-Jan-18      | 1           | Veillonella dispar                   |                               | Veillonella dispar                   | 1488   | 0           | ChDC PV-A60       | genomic DNA |           | tongue subgingival dental plaque                                                           | 1                      | 1488     | FALSE   | ncbi_filtered | 39778         |       |
| NR_115355_1_1498              | 39778   | NR_115355       | Veillonella dispar strain ATCC 17748 16S ribosomal RNA gene, partial sequence                    | 3-Feb-15      | 4-Jan-18      | 1           | Veillonella dispar                   | RefSeq                        | Veillonella dispar                   | 1498   | 2           | ATCC 17748        | rRNA        |           |                                                                                            | 1                      | 1498     | TRUE    | ncbi_filtered | 39778         |       |
| NZ_GG667604_4351_5919         | 546273  | NZ_GG667604     | Veillonella dispar ATCC 17748 Scf100, whole genome shotgun sequence                              | 7-Apr-17      | 4-Jan-18      | 1           | Veillonella dispar ATCC 17748        | WGS;RefSeq                    | Veillonella dispar ATCC 17748        | 1569   | 0           | ATCC 17748        | genomic DNA |           | biological product [ENVO:02000043]                                                         | 4351                   | 5919     | TRUE    | ncbi_filtered | 39778         |       |
| AF537596_1_1477               | 39791   | AF537596        | Corynebacterium glucuronolyticum isolate 98-098 16S ribosomal RNA gene, partial sequence         | 31-Oct-02     | 4-Jan-18      | 1           | Corynebacterium glucuronolyticum     |                               | Corynebacterium glucuronolyticum     | 1477   | 1           |                   | genomic DNA |           | National Microbiology Laboratory Special Bacteriology Identifier 98-0098                   | human peritoneal fluid | 1        | 1477    | FALSE         | ncbi_filtered | 39791 |
| NR_036792_1_1483              | 39791   | NR_036792       | Corynebacterium glucuronolyticum strain GF 838 16S ribosomal RNA gene, partial sequence          | 3-Feb-15      | 4-Jan-18      | 1           | Corynebacterium glucuronolyticum     | RefSeq                        | Corynebacterium glucuronolyticum     | 1483   | 1           | GF 838, DSM 44120 | rRNA        |           |                                                                                            | 1                      | 1483     | TRUE    | ncbi_filtered | 39791         |       |
| NZ_FWWS01000036_92_1627       | 39791   | NZ_FWWS01000036 | Corynebacterium glucuronolyticum strain DSM 44120, whole genome shotgun sequence                 | 5-Sep-17      | 4-Jan-18      | 1           | Corynebacterium glucuronolyticum     | WGS;RefSeq                    | Corynebacterium glucuronolyticum     | 1536   | 0           | DSM 44120         | genomic DNA |           |                                                                                            | 92                     | 1627     | TRUE    | ncbi_filtered | 39791         |       |
| X84375_1_1323                 | 39791   | X84375          | Dialister pneumosintes strain R-27502 16S ribosomal RNA gene, partial sequence                   | 1-Sep-95      | 4-Jan-18      | 1           | Corynebacterium glucuronolyticum     |                               | Corynebacterium glucuronolyticum     | 1323   | 9           | CIP 104297T       | genomic DNA |           |                                                                                            | 1                      | 1323     | FALSE   | ncbi_filtered | 39791         |       |
| K0683931_1_1461               | 39950   | K0683931        | Dialister pneumosintes strain R-27502 16S ribosomal RNA gene, partial sequence                   | 1-Sep-17      | 4-Jan-18      | 1           | Dialister pneumosintes               |                               | Dialister pneumosintes               | 1461   | 0           | R-27502           | genomic DNA |           | Blood culture                                                                              | 1                      | 1461     | FALSE   | ncbi_filtered | 39950         |       |
| NZ_CP017037_222184_223760     | 39950   | NZ_CP017037     | Dialister pneumosintes strain FO677, complete genome                                             | 17-Apr-17     | 4-Jan-18      | 1           | Dialister pneumosintes               | RefSeq                        | Dialister pneumosintes               | 1577   | 0           | FO677             | genomic DNA |           | urette                                                                                     | 222184                 | 223760   | FALSE   | ncbi_filtered | 39950         |       |
| UI13040_1_1493                | 39950   | UI13040         | Dial                                                                                             |               |               |             |                                      |                               |                                      |        |             |                   |             |           |                                                                                            |                        |          |         |               |               |       |

| seqname                      | tax_id  | accession      | description                                                                                 | modified_date | download_date | version_num | source                         | keywords                        | organism                       | length | ambig_count | strain          | mol_type    | isolate                            | isolation_source                                                                                                         | seq_start | seq_stop | isotype | collection    | species |
|------------------------------|---------|----------------|---------------------------------------------------------------------------------------------|---------------|---------------|-------------|--------------------------------|---------------------------------|--------------------------------|--------|-------------|-----------------|-------------|------------------------------------|--------------------------------------------------------------------------------------------------------------------------|-----------|----------|---------|---------------|---------|
| HQ406757_1_1428              | 40216   | HQ406757       | Acinetobacter radioresistens strain TY375D 16S ribosomal RNA gene, partial sequence         | 30-Apr-12     | 4-Jan-18      | 1           | Acinetobacter radioresistens   |                                 | Acinetobacter radioresistens   | 1428   | 1           | TY375D          | genomic DNA |                                    | Stenococcus stellatus rhizosphere during dry season                                                                      | 1         | 1428     | FALSE   | ncbi_filtered | 40216   |
| J0618289_1_1431              | 40216   | J0618289       | Acinetobacter radioresistens strain SMAA 16S ribosomal RNA gene, partial sequence           | 20-Mar-12     | 4-Jan-18      | 1           | Acinetobacter radioresistens   |                                 | Acinetobacter radioresistens   | 1431   | 0           | SMAA            | genomic DNA |                                    | rhizosphere soil                                                                                                         | 1         | 1431     | FALSE   | ncbi_filtered | 40216   |
| KU922210_1_1437              | 40216   | KU922210       | Acinetobacter radioresistens strain D43 16S ribosomal RNA gene, partial sequence            | 14-Jan-17     | 4-Jan-18      | 1           | Acinetobacter radioresistens   |                                 | Acinetobacter radioresistens   | 1387   | 0           | D43             | genomic DNA | air                                |                                                                                                                          | 1         | 1387     | FALSE   | ncbi_filtered | 40216   |
| KY767533_1_1423              | 40216   | KY767533       | Acinetobacter radioresistens strain LJ16107 16S ribosomal RNA gene, partial sequence        | 19-Mar-17     | 4-Jan-18      | 1           | Acinetobacter radioresistens   |                                 | Acinetobacter radioresistens   | 1423   | 0           | LJ16107         | genomic DNA |                                    |                                                                                                                          | 1         | 1423     | FALSE   | ncbi_filtered | 40216   |
| AJ131916_1_1398              | 40324   | AJ131916       | Stenotrophomonas maltophilia, 16S rRNA gene, strain LMG 11002                               | 19-Nov-99     | 4-Jan-18      | 1           | Stenotrophomonas maltophilia   | 16S ribosomal RNA;16S rRNA gene | Stenotrophomonas maltophilia   | 1398   | 7           | LMG 11002       | genomic DNA |                                    |                                                                                                                          | 1         | 1398     | FALSE   | ncbi_filtered | 40324   |
| EU239136_1_1227              | 40324   | EU239136       | Stenotrophomonas maltophilia strain KNUC311 16S ribosomal RNA gene, partial sequence        | 2-Nov-08      | 4-Jan-18      | 1           | Stenotrophomonas maltophilia   |                                 | Stenotrophomonas maltophilia   | 1227   | 0           | KNUC311         | genomic DNA |                                    |                                                                                                                          | 1         | 1227     | FALSE   | ncbi_filtered | 40324   |
| KX350012_1_1446              | 40324   | KX350012       | Stenotrophomonas maltophilia strain F3-1-27 16S ribosomal RNA gene, partial sequence        | 22-Jun-16     | 4-Jan-18      | 1           | Stenotrophomonas maltophilia   |                                 | Stenotrophomonas maltophilia   | 1446   | 0           | F3-1-27         | genomic DNA |                                    |                                                                                                                          | 1         | 1446     | FALSE   | ncbi_filtered | 40324   |
| LNQV01001229_2896_4442       | 40324   | LNQV01001229   | Stenotrophomonas maltophilia strain SM17 17_10ntor_rep_c7890, whole genome shotgun sequence | 15-Jan-16     | 4-Jan-18      | 1           | Stenotrophomonas maltophilia   | WGS                             | Stenotrophomonas maltophilia   | 1547   | 0           | SM17            | genomic DNA | blood                              |                                                                                                                          | 2896      | 4442     | FALSE   | ncbi_filtered | 40324   |
| MG557805_1_1474              | 40324   | MG557805       | Stenotrophomonas maltophilia strain 309-3 16S ribosomal RNA gene, partial sequence          | 27-Nov-17     | 4-Jan-18      | 1           | Stenotrophomonas maltophilia   |                                 | Stenotrophomonas maltophilia   | 1474   | 0           | 309-3           | genomic DNA |                                    |                                                                                                                          | 1         | 1474     | FALSE   | ncbi_filtered | 40324   |
| NR_025930_1_1380             | 40518   | NR_025930      | Ruminococcus bromii strain ATCC 27255 16S ribosomal RNA gene, partial sequence              | 3-Feb-15      | 4-Jan-18      | 1           | Ruminococcus bromii            | RefSeq                          | Ruminococcus bromii            | 1380   | 10          | ATCC 27255      | rRNA        |                                    |                                                                                                                          | 1         | 1380     | TRUE    | ncbi_filtered | 40518   |
| NZ_LNBY0100029_3961_5496     | 40518   | NZ_LNBY0100029 | Ruminococcus bromii strain SAMG contig00029, whole genome shotgun sequence                  | 14-Dec-17     | 4-Jan-18      | 1           | Ruminococcus bromii            | WGS;RefSeq                      | Ruminococcus bromii            | 1536   | 0           | SAMG            | genomic DNA | feces                              |                                                                                                                          | 3961      | 5496     | FALSE   | ncbi_filtered | 40518   |
| NZ_NPHY0100005_3515_5050     | 40518   | NZ_NPHY0100005 | Ruminococcus bromii strain L2-36 contig00007, whole genome shotgun sequence                 | 14-Dec-17     | 4-Jan-18      | 1           | Ruminococcus bromii            | WGS;RefSeq                      | Ruminococcus bromii            | 1536   | 0           | L2-36           | genomic DNA | feces                              |                                                                                                                          | 3515      | 5050     | FALSE   | ncbi_filtered | 40518   |
| X85099_1_1478                | 40518   | X85099         | Ruminococcus bromii 16S rRNA gene                                                           | 8-Sep-95      | 4-Jan-18      | 1           | Ruminococcus bromii            | 16S rRNA;ribosomal RNA          | Ruminococcus bromii            | 1578   | 0           | 1478            | genomic DNA |                                    |                                                                                                                          | 1         | 1478     | FALSE   | ncbi_filtered | 40518   |
| AY169411_1_1488              | 40520   | AY169411       | Ruminococcus obeum clone 1-4 16S ribosomal RNA gene, partial sequence                       | 4-Apr-03      | 4-Jan-18      | 1           | Blautia obeum                  |                                 | Blautia obeum                  | 1488   | 0           |                 | genomic DNA |                                    | low temperature anaerobic enrichment of a Greenland ice core sample from 3042 meters depth                               | 1         | 1488     | FALSE   | ncbi_filtered | 40520   |
| NZ_CYZD0100006_674_2153      | 40520   | NZ_CYZD0100006 | Blautia obeum strain 27895TDY5608837, whole genome shotgun sequence                         | 4-Apr-17      | 4-Jan-18      | 1           | Blautia obeum                  | WGS;RefSeq                      | Blautia obeum                  | 1480   | 2           | 27895TDY5608837 | genomic DNA |                                    | faeces                                                                                                                   | 674       | 2153     | FALSE   | ncbi_filtered | 40520   |
| NZ_CB8A0100012_112571_141107 | 40520   | NZ_CB8A0100012 | Blautia obeum strain 27895TDY5834921, whole genome shotgun sequence                         | 4-Apr-17      | 4-Jan-18      | 1           | Blautia obeum                  | WGS;RefSeq                      | Blautia obeum                  | 1537   | 0           | 27895TDY5834921 | genomic DNA |                                    | faeces                                                                                                                   | 112571    | 141107   | FALSE   | ncbi_filtered | 40520   |
| NZ_DS264307_97033_98569      | 41149   | NZ_DS264307    | Blautia obeum ATCC 29174 Sctf0218, whole genome shotgun sequence                            | 10-Apr-17     | 4-Jan-18      | 1           | Blautia obeum ATCC 29174       | WGS;RefSeq                      | Blautia obeum ATCC 29174       | 1537   | 0           | ATCC 29174      | genomic DNA | biological product [ENVO:02000043] |                                                                                                                          | 97033     | 98569    | TRUE    | ncbi_filtered | 40520   |
| X85101_1_1457                | 40520   | X85101         | Blautia obeum 16S rRNA gene                                                                 | 6-Sep-95      | 4-Jan-18      | 1           | Blautia obeum                  | 16S rRNA;ribosomal RNA          | Blautia obeum                  | 1457   | 3           | 1457            | genomic DNA |                                    |                                                                                                                          | 1         | 1457     | FALSE   | ncbi_filtered | 40520   |
| GU086178_1_1311              | 40542   | GU086178       | Leptotrichia buccalis strain HKU27 16S ribosomal RNA gene, partial sequence                 | 7-Nov-09      | 4-Jan-18      | 1           | Leptotrichia buccalis          |                                 | Leptotrichia buccalis          | 1311   | 0           | HKU27           | genomic DNA |                                    |                                                                                                                          | 1         | 1311     | FALSE   | ncbi_filtered | 40542   |
| NC_013192_178161_179682      | 523794  | NC_013192      | Leptotrichia buccalis DSM 1135, complete genome                                             | 17-Apr-17     | 4-Jan-18      | 1           | Leptotrichia buccalis C-1013-b | RefSeq                          | Leptotrichia buccalis C-1013-b | 1522   | 0           | DSM 1135        | genomic DNA |                                    |                                                                                                                          | 178161    | 179682   | TRUE    | ncbi_filtered | 40542   |
| NC_013192_1958779_1960300    | 523794  | NC_013192      | Leptotrichia buccalis DSM 1135, complete genome                                             | 17-Apr-17     | 4-Jan-18      | 1           | Leptotrichia buccalis C-1013-b | RefSeq                          | Leptotrichia buccalis C-1013-b | 1522   | 0           | DSM 1135        | genomic DNA |                                    |                                                                                                                          | 1958779   | 1960300  | TRUE    | ncbi_filtered | 40542   |
| NC_013192_477541_479062      | 523794  | NC_013192      | Leptotrichia buccalis DSM 1135, complete genome                                             | 17-Apr-17     | 4-Jan-18      | 1           | Leptotrichia buccalis C-1013-b | RefSeq                          | Leptotrichia buccalis C-1013-b | 1522   | 0           | DSM 1135        | genomic DNA |                                    |                                                                                                                          | 477541    | 479062   | TRUE    | ncbi_filtered | 40542   |
| NR_114394_1_1473             | 40542   | NR_114394      | Leptotrichia buccalis 16S ribosomal RNA gene, partial sequence                              | 3-Feb-15      | 4-Jan-18      | 1           | Leptotrichia buccalis          | RefSeq                          | Leptotrichia buccalis          | 1473   | 0           | C-1013-b        | rRNA        |                                    |                                                                                                                          | 1         | 1473     | TRUE    | ncbi_filtered | 40542   |
| KP18828_1_1456               | 40543   | KP18828        | Sneathia sanguinegens strain 357015/2014 16S ribosomal RNA gene, partial sequence           | 27-May-15     | 4-Jan-18      | 1           | Sneathia sanguinegens          |                                 | Sneathia sanguinegens          | 1456   | 0           | 357015/2014     | genomic DNA |                                    |                                                                                                                          | 1         | 1456     | FALSE   | ncbi_filtered | 40543   |
| L37789_1_1462                | 40543   | L37789         | Sneathia sanguinegens 16S ribosomal RNA gene, complete sequence                             | 23-Sep-99     | 4-Jan-18      | 1           | Sneathia sanguinegens          | 16S ribosomal RNA               | Sneathia sanguinegens          | 1462   | 8           |                 | genomic DNA |                                    |                                                                                                                          | 1         | 1462     | FALSE   | ncbi_filtered | 40543   |
| NR_025487_1_1362             | 40543   | NR_025487      | Sneathia sanguinegens strain CCGU 41628 16S ribosomal RNA gene, partial sequence            | 3-Feb-15      | 4-Jan-18      | 1           | Sneathia sanguinegens          | RefSeq                          | Sneathia sanguinegens          | 1362   | 2           | CCGU 41628      | rRNA        |                                    |                                                                                                                          | 1         | 1362     | TRUE    | ncbi_filtered | 40543   |
| NZ_LOQF0100021_149_1673      | 40543   | NZ_LOQF0100021 | Sneathia sanguinegens strain CCGU41628 contig_24, whole genome shotgun sequence             | 16-Apr-17     | 4-Jan-18      | 1           | Sneathia sanguinegens          | WGS;RefSeq                      | Sneathia sanguinegens          | 1525   | 0           | CCGU41628       | genomic DNA |                                    |                                                                                                                          | 149       | 1673     | TRUE    | ncbi_filtered | 40543   |
| JN664114_1_1359              | 40545   | JN664114       | Sutterella wadsworthensis strain SW23 16S ribosomal RNA gene, partial sequence              | 8-Nov-11      | 4-Jan-18      | 1           | Sutterella wadsworthensis      |                                 | Sutterella wadsworthensis      | 1359   | 0           | SW23            | genomic DNA |                                    | colonic biopsy                                                                                                           | 1         | 1359     | FALSE   | ncbi_filtered | 40545   |
| L37786_1_1454                | 40545   | L37786         | Sutterella wadsworthensis strain 9054 16S ribosomal RNA gene, complete sequence             | 8-Aug-00      | 4-Jan-18      | 1           | Sutterella wadsworthensis      |                                 | Sutterella wadsworthensis      | 1454   | 0           | 9054            | genomic DNA |                                    |                                                                                                                          | 1         | 1454     | FALSE   | ncbi_filtered | 40545   |
| L723688_1_1498               | 40545   | L723688        | Sutterella wadsworthensis partial 16S rRNA gene, strain Marseille-P1463                     | 21-Mar-16     | 4-Jan-18      | 1           | Sutterella wadsworthensis      |                                 | Sutterella wadsworthensis      | 1498   | 3           | Marseille-P1463 | genomic DNA |                                    | human gu                                                                                                                 | 1         | 1498     | FALSE   | ncbi_filtered | 40545   |
| L755835_1_1498               | 40545   | L755835        | Sutterella wadsworthensis partial 16S rRNA gene, strain Marseille-P1463                     | 1-May-16      | 4-Jan-18      | 1           | Sutterella wadsworthensis      |                                 | Sutterella wadsworthensis      | 1498   | 1           | Marseille-P1463 | genomic DNA |                                    | Human stool                                                                                                              | 1         | 1498     | FALSE   | ncbi_filtered | 40545   |
| NR_104851_1_1449             | 40545   | NR_104851      | Sutterella wadsworthensis strain WAL 9799 16S ribosomal RNA gene, partial sequence          | 3-Feb-15      | 4-Jan-18      | 1           | Sutterella wadsworthensis      | RefSeq                          | Sutterella wadsworthensis      | 1449   | 0           | WAL 9799        | rRNA        |                                    |                                                                                                                          | 1         | 1449     | TRUE    | ncbi_filtered | 40545   |
| AJ505852_1_1482              | 40561   | AJ505852       | Zoogloea resiniphila partial 16S rRNA gene, strain PIV-3A2y                                 | 12-Mar-03     | 4-Jan-18      | 1           | Zoogloea resiniphila           | 16S ribosomal RNA;16S rRNA gene | Zoogloea resiniphila           | 1482   | 1           | PIV-3A2y        | genomic DNA |                                    | activated sewage sludge                                                                                                  | 1         | 1482     | FALSE   | ncbi_filtered | 40561   |
| AJ505854_1_1481              | 40561   | AJ505854       | Zoogloea resiniphila partial 16S rRNA gene, strain PIV-3C2y                                 | 12-Mar-03     | 4-Jan-18      | 1           | Zoogloea resiniphila           | 16S ribosomal RNA;16S rRNA gene | Zoogloea resiniphila           | 1481   | 1           | PIV-3C2y        | genomic DNA |                                    | activated sewage sludge                                                                                                  | 1         | 1481     | FALSE   | ncbi_filtered | 40561   |
| JQ95475_1_1413               | 40561   | JQ95475        | Zoogloea resiniphila strain IC52 16S ribosomal RNA gene, partial sequence                   | 22-Nov-13     | 4-Jan-18      | 1           | Zoogloea resiniphila           |                                 | Zoogloea resiniphila           | 1413   | 0           | IC52            | genomic DNA |                                    | wastewater during tertiary treatment                                                                                     | 1         | 1413     | FALSE   | ncbi_filtered | 40561   |
| KU321684_1_1530              | 40561   | KU321684       | Zoogloea resiniphila strain MMB 16S ribosomal RNA gene, partial sequence                    | 7-Apr-16      | 4-Jan-18      | 1           | Zoogloea resiniphila           |                                 | Zoogloea resiniphila           | 1530   | 0           | MMB             | genomic DNA |                                    |                                                                                                                          | 1         | 1530     | FALSE   | ncbi_filtered | 40561   |
| KU356572_1_1475              | 40561   | KU356572       | Zoogloea resiniphila strain T59 16S ribosomal RNA gene, partial sequence                    | 7-Apr-16      | 4-Jan-18      | 1           | Zoogloea resiniphila           |                                 | Zoogloea resiniphila           | 1475   | 0           | T59             | genomic DNA |                                    |                                                                                                                          | 1         | 1475     | FALSE   | ncbi_filtered | 40561   |
| AB649020_1_1445              | 40682   | AB649020       | Sphingomonas mali gene for 16S rRNA, partial sequence, strain: S32423                       | 29-Jul-11     | 4-Jan-18      | 1           | Sphingomonas mali              |                                 | Sphingomonas mali              | 1445   | 0           | S32423          | genomic DNA |                                    | paddy soil in experimental farm                                                                                          | 1         | 1445     | FALSE   | ncbi_filtered | 40682   |
| AB740933_1_1423              | 40682   | AB740933       | Sphingomonas mali gene for 16S rRNA, partial sequence, strain: GM289                        | 10-Aug-12     | 4-Jan-18      | 1           | Sphingomonas mali              |                                 | Sphingomonas mali              | 1423   | 1           | GM289           | genomic DNA |                                    | grassland soil in Kawatabi experimental farm of Tohoku University                                                        | 1         | 1423     | FALSE   | ncbi_filtered | 40682   |
| JN592470_1_1385              | 40682   | JN592470       | Sphingomonas mali strain CRII-53 16S ribosomal RNA gene, partial sequence                   | 16-Jan-12     | 4-Jan-18      | 1           | Sphingomonas mali              |                                 | Sphingomonas mali              | 1385   | 0           | CRII-53         | genomic DNA |                                    | non-flooded rice field                                                                                                   | 1         | 1385     | FALSE   | ncbi_filtered | 40682   |
| NR_026374_1_1424             | 40682   | NR_026374      | Sphingomonas mali strain IFO 15500 16S ribosomal RNA gene, partial sequence                 | 3-Feb-15      | 4-Jan-18      | 1           | Sphingomonas mali              | RefSeq                          | Sphingomonas mali              | 1442   | 4           | IFO 15500       | rRNA        |                                    |                                                                                                                          | 1         | 1442     | TRUE    | ncbi_filtered | 40682   |
| NZ_BCY0100023_9772_11265     | 1219048 | NZ_BCY0100023  | Sphingomonas mali NBRC 15500, whole genome shotgun sequence                                 | 17-Apr-17     | 4-Jan-18      | 1           | Sphingomonas mali NBRC 15500   | WGS;RefSeq;STANDARD_DRAFT       | Sphingomonas mali NBRC 15500   | 1494   | 0           | NBRC 15500      | genomic DNA |                                    |                                                                                                                          | 9772      | 11265    | TRUE    | ncbi_filtered | 40682   |
| EU678359_1_1399              | 41202   | EU678359       | Ewingella americana strain CH5 16S ribosomal RNA gene, partial sequence                     | 19-May-08     | 4-Jan-18      | 1           | Ewingella americana            |                                 | Ewingella americana            | 1399   | 0           | CH5             | genomic DNA |                                    |                                                                                                                          | 1         | 1399     | FALSE   | ncbi_filtered | 41202   |
| HE585220_1_1457              | 41202   | HE585220       | Ewingella americana partial 16S rRNA gene, strain LPPA 2027                                 | 13-Dec-12     | 4-Jan-18      | 1           | Ewingella americana            |                                 | Ewingella americana            | 1457   | 0           | LPPA 2027       | genomic DNA |                                    | Agaricus bisporus                                                                                                        | 1         | 1457     | FALSE   | ncbi_filtered | 41202   |
| HE585222_1_1464              | 41202   | HE585222       | Ewingella americana partial 16S rRNA gene, strain LPPA 2037                                 | 13-Dec-12     | 4-Jan-18      | 1           | Ewingella americana            |                                 | Ewingella americana            | 1464   | 0           | LPPA 2037       | genomic DNA |                                    | Agaricus bisporus                                                                                                        | 1         | 1464     | FALSE   | ncbi_filtered | 41202   |
| JF706505_1_1400              | 41202   | JF706505       | Ewingella americana strain PDD-32b-58 16S ribosomal RNA gene, partial sequence              | 8-Jan-13      | 4-Jan-18      | 1           | Ewingella americana            |                                 | Ewingella americana            | 1400   | 0           | PDD-32b-58      | genomic DNA |                                    | cloud water                                                                                                              | 1         | 1400     | FALSE   | ncbi_filtered | 41202   |
| KX129834_1_1337              | 41202   | KX129834       | Ewingella americana strain INAD1143 16S ribosomal RNA gene, partial sequence                | 31-May-16     | 4-Jan-18      | 1           | Ewingella americana            |                                 | Ewingella americana            | 1337   | 0           | INAD1143        | genomic DNA |                                    |                                                                                                                          | 1         | 1337     | FALSE   | ncbi_filtered | 41202   |
| AJ007801_1_1390              | 41276   | AJ007801       | Brevundimonas vesicularis 16S rRNA gene                                                     | 12-Mar-99     | 4-Jan-18      | 1           | Brevundimonas vesicularis      | 16S ribosomal RNA;16S rRNA gene | Brevundimonas vesicularis      | 1390   | 0           | ACM 2862 (T)    | genomic DNA |                                    |                                                                                                                          | 1         | 1390     | FALSE   | ncbi_filtered | 41276   |
| FI99941_1_1399               | 41276   | FI99941        | Brevundimonas vesicularis strain EQH12 16S ribosomal RNA gene, partial sequence             | 15-Aug-09     | 4-Jan-18      | 1           | Brevundimonas vesicularis      |                                 | Brevundimonas vesicularis      | 1399   | 0           | EQH12           | genomic DNA |                                    | 37 degrees 29 minutes to 37 degrees 45 minutes N, 101 degrees 12 minutes E to 101 degrees 33 minutes E, altitude: 3200 m | 1         | 1399     | FALSE   | ncbi_filtered | 41276   |
| KM488428_1_1358              | 41276   | KM488428       | Brevundimonas vesicularis strain D67 16S ribosomal RNA gene, partial sequence               | 30-Oct-14     | 4-Jan-18      | 1           | Brevundimonas vesicularis      |                                 | Brevundimonas vesicularis      | 1358   | 0           | D67             | genomic DNA |                                    | Chinampa soil                                                                                                            | 1         | 1358     | FALSE   | ncbi_filtered | 41276   |
| KR085853_1_1384              | 41276   | KR085853       | Brevundimonas vesicularis strain IHB8 1140 16S ribosomal RNA gene, partial sequence         | 11-Aug-15     | 4-Jan-18      | 1           | Brevundimonas vesicularis      |                                 |                                |        |             |                 |             |                                    |                                                                                                                          |           |          |         |               |         |

| seqname                      | tax_id  | accession       | description                                                                                         | modified_date | download_date | version | num_source | keywords                           | organism                                                | length | ambig_count | strain                 | mol_type    | isolate | isolation_source                                      | seq_start | seq_stop | is_type | collection    | species |
|------------------------------|---------|-----------------|-----------------------------------------------------------------------------------------------------|---------------|---------------|---------|------------|------------------------------------|---------------------------------------------------------|--------|-------------|------------------------|-------------|---------|-------------------------------------------------------|-----------|----------|---------|---------------|---------|
| NR_118691_1_1435             | 43064   | NR_118691       | Trichococcus pasteurii strain ATCC 35945 16S ribosomal RNA, partial sequence                        | 24-Oct-17     | 4-Jan-18      | 1       |            | Trichococcus pasteurii RefSeq      | Trichococcus pasteurii                                  | 1435   | 3           | ATCC 35945             | rRNA        |         |                                                       | 1         | 1435     | TRUE    | ncbi_filtered | 43064   |
| LN881578_1_1432              | 43143   | LN881578        | Tissierella creatinini partial 16S rRNA gene, isolate DG3                                           | 24-Sep-15     | 4-Jan-18      | 1       |            | Tissierella creatinini RefSeq      | Tissierella creatinini                                  | 1432   | 1           |                        | genomic DNA | DG3     | biogas plant                                          | 1         | 1432     | FALSE   | ncbi_filtered | 43143   |
| NR_104805_1_1520             | 43143   | NR_104805       | Tissierella creatinini strain BN11 16S ribosomal RNA gene, partial sequence                         | 3-Feb-15      | 4-Jan-18      | 1       |            | Tissierella creatinini RefSeq      | Tissierella creatinini                                  | 1520   | 0           | BN11                   | rRNA        |         |                                                       | 1         | 1520     | TRUE    | ncbi_filtered | 43143   |
| NR_117155_1_1518             | 43143   | NR_117155       | Tissierella creatinini strain DSM 9508 16S ribosomal RNA gene, partial sequence                     | 3-Feb-15      | 4-Jan-18      | 1       |            | Tissierella creatinini RefSeq      | Tissierella creatinini                                  | 1518   | 0           | DSM 9508               | rRNA        |         |                                                       | 1         | 1518     | TRUE    | ncbi_filtered | 43143   |
| NR_117378_1_1372             | 43143   | NR_117378       | Tissierella creatinini strain DSM 9508 16S ribosomal RNA gene, partial sequence                     | 3-Feb-15      | 4-Jan-18      | 1       |            | Tissierella creatinini RefSeq      | Tissierella creatinini                                  | 1372   | 0           | DSM 9508               | rRNA        |         |                                                       | 1         | 1372     | TRUE    | ncbi_filtered | 43143   |
| JF496362_1_1412              | 43670   | JF496362        | Cellulomonas cellasea strain A6-6 16S ribosomal RNA gene, partial sequence                          | 19-Aug-11     | 4-Jan-18      | 1       |            | Cellulomonas cellasea RefSeq       | Cellulomonas cellasea                                   | 1412   | 0           | A6-6                   | genomic DNA |         | soil crust                                            | 1         | 1412     | FALSE   | ncbi_filtered | 43670   |
| JN180132_1_1467              | 43670   | JN180132        | Cellulomonas cellasea strain 126188 16S ribosomal RNA gene, partial sequence                        | 31-Jul-11     | 4-Jan-18      | 1       |            | Cellulomonas cellasea RefSeq       | Cellulomonas cellasea                                   | 1467   | 3           | 126188                 | genomic DNA |         | soil                                                  | 1         | 1467     | FALSE   | ncbi_filtered | 43670   |
| JX840997_1_1481              | 43670   | JX840997        | Cellulomonas cellasea strain CB-281440 16S ribosomal RNA gene, partial sequence                     | 17-Mar-16     | 4-Jan-18      | 1       |            | Cellulomonas cellasea RefSeq       | Cellulomonas cellasea                                   | 1481   | 0           | CB-281440              | genomic DNA |         | rhizosphere soil from the Sierra Nevada National Park | 1         | 1481     | FALSE   | ncbi_filtered | 43670   |
| KP099961_1_1447              | 43670   | KP099961        | Cellulomonas cellasea strain HMF2762 16S ribosomal RNA gene, partial sequence                       | 17-Mar-15     | 4-Jan-18      | 1       |            | Cellulomonas cellasea RefSeq       | Cellulomonas cellasea                                   | 1447   | 0           | HMF2762                | genomic DNA |         | sediment                                              | 1         | 1447     | FALSE   | ncbi_filtered | 43670   |
| NR_037077_1_1453             | 43670   | NR_037077       | Cellulomonas cellasea strain NRS-124 16S ribosomal RNA gene, partial sequence                       | 3-Feb-15      | 4-Jan-18      | 1       |            | Cellulomonas cellasea RefSeq       | Cellulomonas cellasea                                   | 1453   | 0           | NRS-124, DSM 20118     | rRNA        |         |                                                       | 1         | 1453     | TRUE    | ncbi_filtered | 43670   |
| ACX0100029_19358_20885       | 862422  | ACX0100029      | Actinotalea fermentans ATCC 43279 = JCM 9966 = DSM 3133 contig30, whole genome shotgun sequence     | 16-Oct-14     | 4-Jan-18      | 1       |            | WGS                                | Actinotalea fermentans ATCC 43279 = JCM 9966 = DSM 3133 | 1528   | 0           | DSM 3133               | genomic DNA |         | municipal dumping ground                              | 19358     | 20885    | TRUE    | ncbi_filtered | 43671   |
| AY167843_1_1402              | 43671   | AY167843        | Actinotalea fermentans strain SAFR-046 16S ribosomal RNA gene, partial sequence                     | 9-Feb-09      | 4-Jan-18      | 1       |            | Actinotalea fermentans RefSeq      | Actinotalea fermentans                                  | 1402   | 0           | SAFR-046               | genomic DNA |         |                                                       | 1         | 1402     | FALSE   | ncbi_filtered | 43671   |
| JF505966_1_1398              | 43671   | JF505966        | Actinotalea fermentans strain KNUC9032 16S ribosomal RNA gene, partial sequence                     | 6-Jul-11      | 4-Jan-18      | 1       |            | Actinotalea fermentans RefSeq      | Actinotalea fermentans                                  | 1398   | 0           | KNUC9032               | genomic DNA |         | concrete structure                                    | 1         | 1398     | FALSE   | ncbi_filtered | 43671   |
| JF505994_1_1363              | 43671   | JF505994        | Actinotalea fermentans strain KNUC9060 16S ribosomal RNA gene, partial sequence                     | 6-Jul-11      | 4-Jan-18      | 1       |            | Actinotalea fermentans RefSeq      | Actinotalea fermentans                                  | 1363   | 0           | KNUC9060               | genomic DNA |         | concrete structure                                    | 1         | 1363     | FALSE   | ncbi_filtered | 43671   |
| NR_026176_1_1486             | 862422  | NR_026176       | Actinotalea fermentans strain DSM 3133 16S ribosomal RNA gene, partial sequence                     | 3-Feb-15      | 4-Jan-18      | 1       |            | Actinotalea fermentans RefSeq      | Actinotalea fermentans ATCC 43279 = JCM 9966 = DSM 3133 | 1486   | 2           | DSM 3133               | rRNA        |         |                                                       | 1         | 1486     | TRUE    | ncbi_filtered | 43671   |
| NZ_AP014938_991914_993450    | 43675   | NZ_AP014938     | Rothia mucluginosa strain NUM-Rm6536                                                                | 4-Apr-17      | 4-Jan-18      | 1       |            | Rothia mucluginosa RefSeq          | Rothia mucluginosa                                      | 1537   | 0           | NUM-Rm6536             | genomic DNA |         |                                                       | 991914    | 993450   | FALSE   | ncbi_filtered | 43675   |
| NZ_JUOQ0100030_3431_4966     | 43675   | NZ_JUOQ0100030  | Rothia mucluginosa strain 902_RMUC 47_4978_551143, whole genome shotgun sequence                    | 3-Apr-17      | 4-Jan-18      | 1       |            | WGS,RefSeq                         | Rothia mucluginosa                                      | 1536   | 0           | 902_RMUC               | genomic DNA |         |                                                       | 3431      | 4966     | FALSE   | ncbi_filtered | 43675   |
| NZ_VBL01000150_543_2078      | 43675   | NZ_VBL01000150  | Rothia mucluginosa strain 574_RMUC 419_5637_467872_168_254, whole genome shotgun sequence           | 3-Apr-17      | 4-Jan-18      | 1       |            | WGS,RefSeq                         | Rothia mucluginosa                                      | 1536   | 0           | 574_RMUC               | genomic DNA |         |                                                       | 543       | 2078     | FALSE   | ncbi_filtered | 43675   |
| NZ_VLX01000032_104_1638      | 43675   | NZ_VLX01000032  | Rothia mucluginosa strain 329_RMUC 58_5074_571308, whole genome shotgun sequence                    | 3-Apr-17      | 4-Jan-18      | 1       |            | WGS,RefSeq                         | Rothia mucluginosa                                      | 1535   | 0           | 329_RMUC               | genomic DNA |         |                                                       | 104       | 1638     | FALSE   | ncbi_filtered | 43675   |
| NZ_VNPO1000013_556_2091      | 43675   | NZ_VNPO1000013  | Rothia mucluginosa strain 268_RMUC 210_44751_2384953_188_126, whole genome shotgun sequence         | 3-Apr-17      | 4-Jan-18      | 1       |            | WGS,RefSeq                         | Rothia mucluginosa                                      | 1536   | 0           | 268_RMUC               | genomic DNA |         |                                                       | 556       | 2091     | FALSE   | ncbi_filtered | 43675   |
| AB490399_1_1400              | 43765   | AB490399        | Corynebacterium amycolatum gene for 16S ribosomal RNA, partial sequence                             | 12-Mar-09     | 4-Jan-18      | 1       |            | Corynebacterium amycolatum RefSeq  | Corynebacterium amycolatum                              | 1400   | 0           |                        | genomic DNA |         | Blood of 56-year old male                             | 1         | 1400     | FALSE   | ncbi_filtered | 43765   |
| MH109004_1_1322              | 43765   | MH109004        | Corynebacterium amycolatum strain 39PB5 16S ribosomal RNA gene, partial sequence                    | 28-Mar-18     | 31-Mar-18     | 1       |            | Corynebacterium amycolatum RefSeq  | Corynebacterium amycolatum                              | 1322   | 0           | 39PB5                  | genomic DNA |         | cervicovaginal fluid sample                           | 1         | 1322     | FALSE   | ncbi_filtered | 43765   |
| NR_119171_1_1476             | 43765   | NR_119171       | Corynebacterium amycolatum strain NCFB 2768 16S ribosomal RNA, partial sequence                     | 24-Oct-17     | 4-Jan-18      | 1       |            | Corynebacterium amycolatum RefSeq  | Corynebacterium amycolatum                              | 1476   | 3           | NCFB 2768              | rRNA        |         |                                                       | 1         | 1476     | TRUE    | ncbi_filtered | 43765   |
| NZ_ABZL01000033_117_1650     | 533204  | NZ_ABZL01000033 | Corynebacterium amycolatum strain SK46 contig0010, whole genome shotgun sequence                    | 15-Nov-17     | 4-Jan-18      | 1       |            | WGS,RefSeq                         | Corynebacterium amycolatum SK46                         | 1534   | 0           | SK46                   | genomic DNA |         | biological product [ENVO:02000043]                    | 117       | 1650     | FALSE   | ncbi_filtered | 43765   |
| NZ_MTP01000077_131_1870      | 43765   | NZ_MTP01000077  | Corynebacterium amycolatum strain ICIS 9 contig077, whole genome shotgun sequence                   | 17-Apr-17     | 4-Jan-18      | 1       |            | WGS,RefSeq                         | Corynebacterium amycolatum                              | 1540   | 0           | ICIS 9                 | genomic DNA |         | female urogenital tract                               | 331       | 1870     | FALSE   | ncbi_filtered | 43765   |
| AF543287_1_1518              | 43768   | AF543287        | Corynebacterium matruchotii strain CHC OS35 16S ribosomal RNA gene, partial sequence                | 14-Oct-02     | 4-Jan-18      | 1       |            | Corynebacterium matruchotii RefSeq | Corynebacterium matruchotii                             | 1518   | 0           | CHC OS35               | genomic DNA |         | oral isolate                                          | 1         | 1518     | FALSE   | ncbi_filtered | 43768   |
| NZ_ACSH0200003_412_1977      | 553207  | NZ_ACSH0200003  | Corynebacterium matruchotii ATCC 14266                                                              | 7-Apr-17      | 4-Jan-18      | 1       |            | WGS,NONCONTIGUOUS_FINISHED,RefSeq  | Corynebacterium matruchotii ATCC 14266                  | 1566   | 2           | ATCC 14266             | genomic DNA |         | biological product [ENVO:02000043]                    | 412       | 1977     | TRUE    | ncbi_filtered | 43768   |
| NZ_EG973313_3581_5140        | 566549  | NZ_EG973313     | Corynebacterium matruchotii ATCC 33806 Sctf13, whole genome shotgun sequence                        | 7-Apr-17      | 4-Jan-18      | 1       |            | WGS,RefSeq                         | Corynebacterium matruchotii ATCC 33806                  | 1560   | 0           | ATCC 33806             | genomic DNA |         | biological product [ENVO:02000043]                    | 3581      | 5140     | FALSE   | ncbi_filtered | 43768   |
| JX476066_1_1446              | 43769   | JX476066        | Corynebacterium propinquum culture-collection NML91-0124 16S ribosomal RNA gene, partial sequence   | 31-Aug-12     | 4-Jan-18      | 1       |            | Corynebacterium propinquum RefSeq  | Corynebacterium propinquum                              | 1446   | 1           | B41156                 | genomic DNA |         | respiratory tract                                     | 1         | 1446     | FALSE   | ncbi_filtered | 43769   |
| KT962243_1_1410              | 43769   | KT962243        | Corynebacterium propinquum strain Hilsa-KRC-1 16S ribosomal RNA gene, partial sequence              | 17-Jan-16     | 4-Jan-18      | 1       |            | Corynebacterium propinquum RefSeq  | Corynebacterium propinquum                              | 1410   | 0           | Hilsa-KRC-1            | genomic DNA |         |                                                       | 1         | 1410     | FALSE   | ncbi_filtered | 43769   |
| NR_037038_1_1443             | 43769   | NR_037038       | Corynebacterium propinquum strain B 77159 16S ribosomal RNA gene, partial sequence                  | 3-Feb-15      | 4-Jan-18      | 1       |            | Corynebacterium propinquum RefSeq  | Corynebacterium propinquum                              | 1443   | 1           | B 77159                | rRNA        |         |                                                       | 1         | 1443     | TRUE    | ncbi_filtered | 43769   |
| NR_119118_1_1396             | 43769   | NR_119118       | Corynebacterium propinquum strain CIP 103792 16S ribosomal RNA, partial sequence                    | 24-Oct-17     | 4-Jan-18      | 1       |            | Corynebacterium propinquum RefSeq  | Corynebacterium propinquum                              | 1396   | 3           | CIP 103792             | rRNA        |         |                                                       | 1         | 1396     | TRUE    | ncbi_filtered | 43769   |
| NZ_VJSD1000039_107097_108623 | 43769   | NZ_VJSD1000039  | Corynebacterium propinquum strain 149_CIEI 231_108982_1371500_54_137, whole genome shotgun sequence | 10-Apr-17     | 4-Jan-18      | 1       |            | WGS,RefSeq                         | Corynebacterium propinquum                              | 1527   | 0           | 149_CIEI               | genomic DNA |         |                                                       | 107097    | 108623   | FALSE   | ncbi_filtered | 43769   |
| KM001914_1_1456              | 43770   | KM001914        | Corynebacterium striatum strain 2454 16S ribosomal RNA gene, partial sequence                       | 24-Aug-14     | 4-Jan-18      | 1       |            | Corynebacterium striatum RefSeq    | Corynebacterium striatum                                | 1456   | 0           | 2454                   | genomic DNA |         | catheter tip                                          | 1         | 1456     | FALSE   | ncbi_filtered | 43770   |
| LTB01000004_493_2022         | 43770   | LTB01000004     | Corynebacterium striatum strain 2247 lasergene_16_len_T_92854, whole genome shotgun sequence        | 15-Nov-17     | 4-Jan-18      | 1       |            | WGS                                | Corynebacterium striatum                                | 1530   | 0           | 2247                   | genomic DNA |         |                                                       | 493       | 2022     | FALSE   | ncbi_filtered | 43770   |
| MH109026_1_1427              | 43770   | MH109026        | Corynebacterium striatum strain 3PB1 16S ribosomal RNA gene, partial sequence                       | 28-Mar-18     | 31-Mar-18     | 1       |            | Corynebacterium striatum RefSeq    | Corynebacterium striatum                                | 1427   | 1           | 3PB1                   | genomic DNA |         | cervicovaginal fluid sample                           | 1         | 1427     | FALSE   | ncbi_filtered | 43770   |
| NZ_JUSN01000100_65_1594      | 43770   | NZ_JUSN01000100 | Corynebacterium striatum strain 797_CAUR 780_101331_3527691_534_348, whole genome shotgun sequence  | 3-Apr-17      | 4-Jan-18      | 1       |            | WGS,RefSeq                         | Corynebacterium striatum                                | 1530   | 0           | 797_CAUR               | genomic DNA |         |                                                       | 65        | 1594     | FALSE   | ncbi_filtered | 43770   |
| NZ_LBCN0100004_208433_209956 | 43770   | NZ_LBCN0100004  | Consensus from Contig_5_mapping, whole genome shotgun sequence                                      | 10-Jan-18     | 12-Jan-18     | 1       |            | WGS,RefSeq                         | Corynebacterium striatum                                | 1524   | 0           | 2023                   | genomic DNA |         | patients                                              | 208433    | 209956   | FALSE   | ncbi_filtered | 43770   |
| NC_010545_131132_132661      | 504474  | NC_010545       | Corynebacterium urealyticum DSM 7119 complete genome                                                | 7-Apr-17      | 4-Jan-18      | 1       |            | RefSeq,complete genome             | Corynebacterium urealyticum DSM 7119                    | 1530   | 0           | DSM 7119               | genomic DNA |         |                                                       | 131132    | 132661   | TRUE    | ncbi_filtered | 43771   |
| NC_020230_1288135_1289665    | 1267754 | NC_020230       | Corynebacterium urealyticum DSM 7111 complete genome                                                | 8-Apr-17      | 4-Jan-18      | 1       |            | RefSeq                             | Corynebacterium urealyticum DSM 7111                    | 1531   | 0           | DSM 7111               | genomic DNA |         | ectopic kidney of a 9-year-old patient                | 1288135   | 1289665  | FALSE   | ncbi_filtered | 43771   |
| NC_020230_138964_140491      | 1267754 | NC_020230       | Corynebacterium urealyticum DSM 7111 complete genome                                                | 8-Apr-17      | 4-Jan-18      | 1       |            | RefSeq                             | Corynebacterium urealyticum DSM 7111                    | 1528   | 0           | DSM 7111               | genomic DNA |         | ectopic kidney of a 9-year-old patient                | 138964    | 140491   | FALSE   | ncbi_filtered | 43771   |
| NR_027597_1_1401             | 43771   | NR_027597       | Corynebacterium urealyticum strain DSM 7109 16S ribosomal RNA gene, partial sequence                | 3-Feb-15      | 4-Jan-18      | 1       |            | Corynebacterium urealyticum RefSeq | Corynebacterium urealyticum                             | 1401   | 2           | DSM 7109, ATCC 43042   | rRNA        |         |                                                       | 1         | 1401     | TRUE    | ncbi_filtered | 43771   |
| NR_021978_1_1511             | 504474  | NR_021978       | Corynebacterium urealyticum strain DSM 7109 16S ribosomal RNA gene, partial sequence                | 3-Feb-15      | 4-Jan-18      | 1       |            | Corynebacterium urealyticum RefSeq | Corynebacterium urealyticum DSM 7109                    | 1511   | 9           | DSM 7109               | rRNA        |         |                                                       | 1         | 1511     | TRUE    | ncbi_filtered | 43771   |
| AI439344_1_1502              | 43990   | AI439344        | Corynebacterium segmentosum partial 16S rRNA gene, strain CIP107068                                 | 28-Jul-04     | 4-Jan-18      | 1       |            | Corynebacterium segmentosum RefSeq | Corynebacterium segmentosum                             | 1502   | 0           | CIP107068, (C01G37878) | genomic DNA |         |                                                       | 1         | 1502     | FALSE   | ncbi_filtered | 43990   |
| X84437_1_1485                | 43990   | X84437          | Corynebacterium segmentosum partial 16S rRNA gene, strain NCTC 934                                  | 9-Jan-04      | 4-Jan-18      | 1       |            | Corynebacterium segmentosum RefSeq | Corynebacterium segmentosum                             | 1485   | 1           | NCTC 934               | genomic DNA |         |                                                       | 1         | 1485     | FALSE   | ncbi_filtered | 43990   |
| NR_119188_1_1478             | 43995   | NR_119188       | Johnsonella ignava strain ATCC 51276 16S ribosomal RNA, partial sequence                            | 24-Oct-17     | 4-Jan-18      | 1       |            | Johnsonella ignava RefSeq          | Johnsonella ignava                                      | 1478   | 7           | ATCC 51276             | rRNA        |         |                                                       | 1         | 1478     | TRUE    | ncbi_filtered | 43995   |
| NZ_HJ378846_4400_5938        | 679200  | NZ_HJ378846     | Johnsonella ignava ATCC 51276 supercont1.18, whole genome shotgun sequence                          | 17-Apr-17     | 4-Jan-18      | 1       |            | WGS,HIGH_QUALITY_DRAFT,RefSeq      | Johnsonella ignava ATCC 51276                           | 1539   | 0           | ATCC 51276             | genomic DNA |         | biological product [ENVO:02000043]                    | 4400      | 5938     | TRUE    | ncbi_filtered | 43995   |
| NR_044972_1_1506             | 44749   | NR_044972       | Sporobacter termitidis strain SYR 16S ribosomal RNA, partial sequence                               | 24-Oct-17     | 4-Jan-18      | 1       |            | RefSeq                             | Sporobacter termitidis                                  | 1506   | 6           | SYR                    | rRNA        |         |                                                       | 1         | 1506     | TRUE    | ncbi_filtered | 44749   |
| NZ_FQXV01000034_1_1426       | 1123282 | NZ_FQXV01000034 | Sporobacter termitidis DSM 10068, whole genome shotgun sequence                                     | 17-Apr-17     | 4-Jan-18      | 1       |            | WGS,RefSeq                         | Sporobacter termitidis DSM 10068                        | 1426   | 0           | DSM 10068              | genomic DNA |         |                                                       | 1         | 1426     | TRUE    | ncbi_filtered | 44749   |
| MF321833_1_1460              | 44750   | MF321833        | Corynebacterium auris strain JO-22 16S ribosomal RNA gene, partial sequence                         | 28-Jan-18     |               |         |            |                                    |                                                         |        |             |                        |             |         |                                                       |           |          |         |               |         |

| seqname                         | tax_id  | accession       | description                                                                                                  | modified_date | download_date | version | num_source | keywords                      | organism                           | length | ambig_count | strain                 | mol_type    | isolate    | isolation_source                                                                                              | seq_start | seq_end | is_type | collection    | species |
|---------------------------------|---------|-----------------|--------------------------------------------------------------------------------------------------------------|---------------|---------------|---------|------------|-------------------------------|------------------------------------|--------|-------------|------------------------|-------------|------------|---------------------------------------------------------------------------------------------------------------|-----------|---------|---------|---------------|---------|
| NZ_GG663514_3887_5518           | 511680  | NZ_GG663514     | Butyrivibrio crossotus DSM 2876 Sclfd10, whole genome shotgun sequence                                       | 7-Apr-17      | 4-Jan-18      | 1       |            | WGS;RefSeq                    | Butyrivibrio crossotus DSM 2876    | 1532   | 0           | DSM 2876               | genomic DNA |            | biological product [ENVO:02000043]                                                                            | 3987      | 5518    | TRUE    | ncbi_filtered | 45851   |
| X89981_1_1473                   | 45851   | X89981          | B. crossotus DNA for ribosomal RNA gene (strain NCCO 2416)                                                   | 13-Feb-96     | 4-Jan-18      | 1       |            | Butyrivibrio crossotus        | Butyrivibrio crossotus             | 1473   | 8           | NCCO 2416              | genomic DNA |            |                                                                                                               | 1         | 1473    | FALSE   | ncbi_filtered | 45851   |
| FJ380983_1_1436                 | 45972   | FJ380983        | Staphylococcus pasteurii strain BQNC3-01d 16S ribosomal RNA gene, partial sequence                           | 13-Jan-09     | 4-Jan-18      | 1       |            | Staphylococcus pasteurii      | Staphylococcus pasteurii           | 1436   | 3           | BQNC3-01d              | genomic DNA |            | third instar nymph                                                                                            | 1         | 1436    | FALSE   | ncbi_filtered | 45972   |
| GQ503327_1_1472                 | 45972   | GQ503327        | Staphylococcus pasteurii strain CK14 16S ribosomal RNA gene, partial sequence                                | 19-Sep-09     | 4-Jan-18      | 1       |            | Staphylococcus pasteurii      | Staphylococcus pasteurii           | 1472   | 0           | CK14                   | genomic DNA |            | soil sample from polluted industrial area contaminated with tannery effluents containing various heavy metals | 1         | 1472    | FALSE   | ncbi_filtered | 45972   |
| HQ219847_1_1455                 | 45972   | HQ219847        | Staphylococcus pasteurii strain ANA16 16S ribosomal RNA gene, partial sequence                               | 26-Oct-11     | 4-Jan-18      | 1       |            | Staphylococcus pasteurii      | Staphylococcus pasteurii           | 1455   | 1           | ANA16                  | genomic DNA |            | roots                                                                                                         | 1         | 1455    | FALSE   | ncbi_filtered | 45972   |
| KF803587_1_1462                 | 45972   | KF803587        | Staphylococcus pasteurii strain KG-54 16S ribosomal RNA gene, partial sequence                               | 30-Dec-14     | 4-Jan-18      | 1       |            | Staphylococcus pasteurii      | Staphylococcus pasteurii           | 1462   | 2           | KG-54                  | genomic DNA |            | oil field soil                                                                                                | 1         | 1462    | FALSE   | ncbi_filtered | 45972   |
| UV998077_1_1501                 | 45972   | UV998077        | Staphylococcus pasteurii partial 16S rRNA gene, strain mammoth-5                                             | 6-Feb-16      | 4-Jan-18      | 1       |            | Staphylococcus pasteurii      | Staphylococcus pasteurii           | 1501   | 0           | mammoth-5              | genomic DNA |            | Mammoth stool specimen                                                                                        | 1         | 1501    | FALSE   | ncbi_filtered | 45972   |
| AJ121375_1_1456                 | 46124   | AJ121375        | Granulicatella adiacens partial 16S rRNA gene, strain 10/833                                                 | 6-Jun-03      | 4-Jan-18      | 1       |            | Granulicatella adiacens       | Granulicatella adiacens            | 1456   | 4           | 10/833                 | genomic DNA |            |                                                                                                               | 1         | 1456    | FALSE   | ncbi_filtered | 46124   |
| AY879304_1_1529                 | 46124   | AY879304        | Granulicatella adiacens strain 04356101 16S ribosomal RNA gene, partial sequence                             | 18-Jan-08     | 4-Jan-18      | 1       |            | Granulicatella adiacens       | Granulicatella adiacens            | 1529   | 0           | 4356101                | genomic DNA |            |                                                                                                               | 1         | 1529    | FALSE   | ncbi_filtered | 46124   |
| FR822389_1_1499                 | 46124   | FR822389        | Granulicatella adiacens partial 16S rRNA gene, strain CCUG 60768                                             | 17-Feb-11     | 4-Jan-18      | 1       |            | Granulicatella adiacens       | Granulicatella adiacens            | 1495   | 0           | CCUG 60768             | genomic DNA |            | human blood, isolated in a one-year-old patient                                                               | 1         | 1495    | FALSE   | ncbi_filtered | 46124   |
| LC125191_1_1492                 | 46124   | LC125191        | Granulicatella adiacens gene for 16S ribosomal RNA, strain: GFO2                                             | 6-Jul-16      | 4-Jan-18      | 1       |            | Granulicatella adiacens       | Granulicatella adiacens            | 1492   | 0           | GFO2                   | genomic DNA |            | human endophthalmitis patient                                                                                 | 1         | 1492    | FALSE   | ncbi_filtered | 46124   |
| NZ_GG669400_3605_5158           | 638301  | NZ_GG669400     | Granulicatella adiacens ATCC 49175 SCAFFOLD6, whole genome shotgun sequence                                  | 17-Apr-17     | 4-Jan-18      | 1       |            | WGS;RefSeq                    | Granulicatella adiacens ATCC 49175 | 1554   | 0           | ATCC 49175             | genomic DNA |            | biological product [ENVO:02000043]                                                                            | 3605      | 5158    | TRUE    | ncbi_filtered | 46124   |
| AY879306_1_1517                 | 46125   | AY879306        | Abiotrophia defectiva strain 98233068 16S ribosomal RNA gene, partial sequence                               | 18-Jan-08     | 4-Jan-18      | 1       |            | Abiotrophia defectiva         | Abiotrophia defectiva              | 1517   | 0           | 98233068               | genomic DNA |            |                                                                                                               | 1         | 1517    | FALSE   | ncbi_filtered | 46125   |
| AY879308_1_1519                 | 46125   | AY879308        | Abiotrophia defectiva strain 98223019 16S ribosomal RNA gene, partial sequence                               | 18-Jan-08     | 4-Jan-18      | 1       |            | Abiotrophia defectiva         | Abiotrophia defectiva              | 1519   | 0           | 98223019               | genomic DNA |            |                                                                                                               | 1         | 1519    | FALSE   | ncbi_filtered | 46125   |
| KF574953_1_1444                 | 46125   | KF574953        | Abiotrophia defectiva strain 7057 16S ribosomal RNA gene, partial sequence                                   | 30-Nov-13     | 4-Jan-18      | 1       |            | Abiotrophia defectiva         | Abiotrophia defectiva              | 1444   | 0           | 7057                   | genomic DNA |            | blood                                                                                                         | 1         | 1444    | FALSE   | ncbi_filtered | 46125   |
| NR_025863_1_1411                | 46125   | NR_025863       | Abiotrophia defectiva strain Gifu 12707 16S ribosomal RNA gene, partial sequence                             | 3-Feb-15      | 4-Jan-18      | 1       |            | RefSeq;16S rRNA               | Abiotrophia defectiva              | 1411   | 6           | Gifu 12707; ATCC 49176 | rRNA        |            |                                                                                                               | 1         | 1411    | TRUE    | ncbi_filtered | 46125   |
| NZ_KJ535341_179899_181551       | 592010  | NZ_KJ535341     | Abiotrophia defectiva ATCC 49176 Sclfd1, whole genome shotgun sequence                                       | 17-Apr-17     | 4-Jan-18      | 1       |            | WGS;HIGH_QUALITY_DRAFT;RefSeq | Abiotrophia defectiva ATCC 49176   | 1563   | 0           | ATCC 49176             | genomic DNA |            | blood                                                                                                         | 179989    | 181151  | TRUE    | ncbi_filtered | 46125   |
| DD491195_1_1340                 | 46182   | DD491195        | Nonomuraea spiralis strain 4807 16S ribosomal RNA gene, partial sequence                                     | 13-May-06     | 4-Jan-18      | 1       |            | Nonomuraea spiralis           | Nonomuraea spiralis                | 1340   | 0           | 4807                   | genomic DNA |            |                                                                                                               | 1         | 1340    | FALSE   | ncbi_filtered | 46182   |
| NR_026001_1_1409                | 46182   | NR_026001       | Nonomuraea spiralis strain IFO 14097 16S ribosomal RNA gene, partial sequence                                | 3-Feb-15      | 4-Jan-18      | 1       |            | RefSeq                        | Nonomuraea spiralis                | 1409   | 0           | IFO 14097              | rRNA        |            |                                                                                                               | 1         | 1409    | TRUE    | ncbi_filtered | 46182   |
| AF202260_1_1541                 | 46206   | AF202260        | Pseudobutyryl ruminis strain pC-XS2 16S ribosomal RNA gene, partial sequence                                 | 14-Dec-99     | 4-Jan-18      | 1       |            | Pseudobutyryl ruminis         | Pseudobutyryl ruminis              | 1541   | 0           | pC-XS2                 | genomic DNA |            |                                                                                                               | 1         | 1541    | FALSE   | ncbi_filtered | 46206   |
| AF202261_1_1524                 | 46206   | AF202261        | Pseudobutyryl ruminis strain pC-XS6 16S ribosomal RNA gene, partial sequence                                 | 14-Dec-99     | 4-Jan-18      | 1       |            | Pseudobutyryl ruminis         | Pseudobutyryl ruminis              | 1524   | 1           | pC-XS6                 | genomic DNA |            |                                                                                                               | 1         | 1524    | FALSE   | ncbi_filtered | 46206   |
| EU346757_1_1482                 | 46206   | EU346757        | Pseudobutyryl ruminis strain CF1b 16S ribosomal RNA gene, partial sequence                                   | 4-Sep-08      | 4-Jan-18      | 1       |            | Pseudobutyryl ruminis         | Pseudobutyryl ruminis              | 1482   | 3           | CF1b                   | genomic DNA |            |                                                                                                               | 1         | 1482    | FALSE   | ncbi_filtered | 46206   |
| NZ_JNLH01000001_26802_26343     | 1458469 | NZ_JNLH01000001 | Pseudobutyryl ruminis HUN009 B015DRAFT_sc718000000004_quiver_dupTrim_9066_1.C, whole genome shotgun sequence | 22-Oct-17     | 4-Jan-18      | 1       |            | WGS;RefSeq                    | Pseudobutyryl ruminis HUN009       | 1542   | 0           | HUN009                 | genomic DNA |            |                                                                                                               | 24802     | 26343   | FALSE   | ncbi_filtered | 46206   |
| NZ_PDF01000003_529_2070         | 46206   | NZ_PDF01000003  | Pseudobutyryl ruminis strain JK626 contig000084, whole genome shotgun sequence                               | 31-Oct-17     | 4-Jan-18      | 1       |            | WGS;RefSeq                    | Pseudobutyryl ruminis              | 1542   | 0           | JK626                  | genomic DNA |            | rumen fluid                                                                                                   | 529       | 2070    | FALSE   | ncbi_filtered | 46206   |
| NR_027579_1_1402                | 471875  | NR_027579       | Ruminococcus lactaris strain ATCC 29176 16S ribosomal RNA gene, partial sequence                             | 3-Feb-15      | 4-Jan-18      | 1       |            | RefSeq                        | Ruminococcus lactaris ATCC 29176   | 1402   | 9           | ATCC 29176             | rRNA        |            |                                                                                                               | 1         | 1402    | TRUE    | ncbi_filtered | 46228   |
| NZ_DS990170_242301_243841       | 471875  | NZ_DS990170     | Ruminococcus lactaris ATCC 29176 Sclfd_02_7, whole genome shotgun sequence                                   | 7-Apr-17      | 4-Jan-18      | 1       |            | WGS;RefSeq                    | Ruminococcus lactaris ATCC 29176   | 1541   | 0           | ATCC 29176             | genomic DNA |            | biological product [ENVO:02000043]                                                                            | 242301    | 243841  | TRUE    | ncbi_filtered | 46228   |
| NZ_KJ669407_34789_36328         | 1073376 | NZ_KJ669407     | Ruminococcus lactaris CCS9_002D addUH-supercont1.1, whole genome shotgun sequence                            | 9-Apr-17      | 4-Jan-18      | 1       |            | WGS;HIGH_QUALITY_DRAFT;RefSeq | Ruminococcus lactaris CCS9_002D    | 1540   | 0           | CCS9_002D              | genomic DNA |            |                                                                                                               | 34789     | 36328   | FALSE   | ncbi_filtered | 46228   |
| NZ_KJ669407_912973_914513       | 1073376 | NZ_KJ669407     | Ruminococcus lactaris CCS9_002D addUH-supercont1.1, whole genome shotgun sequence                            | 9-Apr-17      | 4-Jan-18      | 1       |            | WGS;HIGH_QUALITY_DRAFT;RefSeq | Ruminococcus lactaris CCS9_002D    | 1541   | 0           | CCS9_002D              | genomic DNA |            |                                                                                                               | 912973    | 914513  | FALSE   | ncbi_filtered | 46228   |
| NZ_KJ669411_2289_3827           | 1073376 | NZ_KJ669411     | Ruminococcus lactaris CCS9_002D addUH-supercont1.5, whole genome shotgun sequence                            | 9-Apr-17      | 4-Jan-18      | 1       |            | WGS;HIGH_QUALITY_DRAFT;RefSeq | Ruminococcus lactaris CCS9_002D    | 1539   | 0           | CCS9_002D              | genomic DNA |            |                                                                                                               | 2289      | 3827    | FALSE   | ncbi_filtered | 46228   |
| AB238929_1_1492                 | 46503   | AB238929        | Parabacteroides merdae gene for 16S ribosomal RNA, partial sequence, strain: JCM 13405                       | 9-Nov-12      | 4-Jan-18      | 1       |            | Parabacteroides merdae        | Parabacteroides merdae             | 1492   | 0           | JCM 13405              | genomic DNA |            | May-88                                                                                                        | 1         | 1492    | FALSE   | ncbi_filtered | 46503   |
| AY169416_1_1303                 | 46503   | AY169416        | Bacteroides merdae 16S ribosomal RNA gene, partial sequence                                                  | 4-Apr-03      | 4-Jan-18      | 1       |            | Parabacteroides merdae        | Parabacteroides merdae             | 1303   | 0           |                        | genomic DNA |            | low temperature anaerobic enrichment of a Greenland ice core sample from 3042 meters depth                    | 1         | 1303    | FALSE   | ncbi_filtered | 46503   |
| EU136685_1_1203                 | 46503   | EU136685        | Parabacteroides merdae strain JCM9497 16S ribosomal RNA gene, partial sequence                               | 30-Apr-08     | 4-Jan-18      | 1       |            | Parabacteroides merdae        | Parabacteroides merdae             | 2023   | 0           | JCM 9497               | genomic DNA |            |                                                                                                               | 1         | 2023    | TRUE    | ncbi_filtered | 46503   |
| EU722738_1_1492                 | 46503   | EU722738        | Parabacteroides merdae 16S ribosomal RNA gene, partial sequence                                              | 29-Sep-08     | 4-Jan-18      | 1       |            | Parabacteroides merdae        | Parabacteroides merdae             | 1492   | 0           | B13                    | genomic DNA |            | human feces                                                                                                   | 1         | 1492    | FALSE   | ncbi_filtered | 46503   |
| NZ_CZAG01000004_62716_64251     | 46503   | NZ_CZAG01000004 | Parabacteroides merdae strain 27895TDYS834848, whole genome shotgun sequence                                 | 12-Jun-17     | 4-Jan-18      | 1       |            | WGS;RefSeq                    | Parabacteroides merdae             | 1536   | 0           | 27895TDYS834848        | genomic DNA |            | faeces                                                                                                        | 62716     | 64251   | FALSE   | ncbi_filtered | 46503   |
| DD497990_1_1441                 | 46507   | DD497990        | Bacteroides coagulans 16S ribosomal RNA gene, partial sequence                                               | 1-Jun-06      | 4-Jan-18      | 1       |            | [Bacteroides] coagulans       | [Bacteroides] coagulans            | 1441   | 0           |                        | genomic DNA |            |                                                                                                               | 1         | 1441    | FALSE   | ncbi_filtered | 46507   |
| NR_104900_1_1473                | 46507   | NR_104900       | [Bacteroides] coagulans strain EUH 581-73 16S ribosomal RNA gene, partial sequence                           | 3-Feb-15      | 4-Jan-18      | 1       |            | RefSeq                        | [Bacteroides] coagulans            | 1473   | 0           | EUH 581-73             | rRNA        |            |                                                                                                               | 1         | 1473    | TRUE    | ncbi_filtered | 46507   |
| NR_113066_1_1489                | 46507   | NR_113066       | [Bacteroides] coagulans strain JCM 12528 16S ribosomal RNA gene, partial sequence                            | 3-Feb-15      | 4-Jan-18      | 1       |            | RefSeq                        | [Bacteroides] coagulans            | 1489   | 0           | JCM 12528              | rRNA        |            |                                                                                                               | 1         | 1489    | TRUE    | ncbi_filtered | 46507   |
| AY445911_1_1452                 | 47229   | AY445911        | Massilia timonae VAZ7232_02 16S ribosomal RNA gene, partial sequence                                         | 30-Nov-03     | 4-Jan-18      | 1       |            | Massilia timonae              | Massilia timonae                   | 1452   | 6           |                        | genomic DNA | VAZ7232_02 | pharyngeal swab of a cystic fibrosis patient                                                                  | 1         | 1452    | FALSE   | ncbi_filtered | 47229   |
| EU240397_1_1343                 | 47229   | EU240397        | Massilia timonae strain B108 16S ribosomal RNA gene, partial sequence                                        | 26-Nov-07     | 4-Jan-18      | 1       |            | Massilia timonae              | Massilia timonae                   | 1343   | 1           | B108                   | genomic DNA |            |                                                                                                               | 1         | 1343    | FALSE   | ncbi_filtered | 47229   |
| EU240399_1_1323                 | 47229   | EU240399        | Massilia timonae strain B140 16S ribosomal RNA gene, partial sequence                                        | 26-Nov-07     | 4-Jan-18      | 1       |            | Massilia timonae              | Massilia timonae                   | 1323   | 0           | B140                   | genomic DNA |            |                                                                                                               | 1         | 1323    | FALSE   | ncbi_filtered | 47229   |
| NZ_JRYB01000001_1946941_1948479 | 47229   | NZ_JRYB01000001 | Massilia timonae strain NEU LOS5.unintig, whole genome shotgun sequence                                      | 13-Apr-17     | 4-Jan-18      | 1       |            | WGS;RefSeq                    | Massilia timonae                   | 1539   | 0           | NEU                    | genomic DNA |            | forest soil                                                                                                   | 1946941   | 1948479 | FALSE   | ncbi_filtered | 47229   |
| NZ_JRYB01000001_840155_841693   | 47229   | NZ_JRYB01000001 | Massilia timonae strain NEU LOS5.unintig, whole genome shotgun sequence                                      | 13-Apr-17     | 4-Jan-18      | 1       |            | WGS;RefSeq                    | Massilia timonae                   | 1539   | 0           | NEU                    | genomic DNA |            | forest soil                                                                                                   | 840155    | 841693  | FALSE   | ncbi_filtered | 47229   |
| NZ_GL636064_48_1584             | 887898  | NZ_GL636064     | Laetropia mirabilis ATCC 51599 SCAFFOLD3, whole genome shotgun sequence                                      | 17-Apr-17     | 4-Jan-18      | 1       |            | WGS;STANDARD_DRAFT;RefSeq     | Laetropia mirabilis ATCC 51599     | 1537   | 0           | ATCC 51599             | genomic DNA |            | oral cavity, gingival crevices                                                                                | 48        | 1584    | TRUE    | ncbi_filtered | 47671   |
| AY773957_1_1501                 | 47715   | AY773957        | Lactobacillus rhamnosus strain KM MSU 529 16S ribosomal RNA gene, complete sequence                          | 20-Dec-06     | 4-Jan-18      | 1       |            | Lactobacillus rhamnosus       | Lactobacillus rhamnosus            | 1501   | 0           |                        | genomic DNA | SD         |                                                                                                               | 1         | 1501    | FALSE   | ncbi_filtered | 47715   |
| KJ459039_1_1361                 | 47715   | KJ459039        | Lactobacillus rhamnosus strain KM MSU 529 16S ribosomal RNA gene, partial sequence                           | 15-Dec-15     | 4-Jan-18      | 1       |            | Lactobacillus rhamnosus       | Lactobacillus rhamnosus            | 1361   | 0           | KM MSU 529             | genomic DNA |            | newborn, 5 days (mother 33 years old)                                                                         | 1         | 1361    | FALSE   | ncbi_filtered | 47715   |
| KJ631122_1_1492                 | 47715   | KJ631122        | Lactobacillus rhamnosus 16S ribosomal RNA gene, partial sequence                                             | 31-Dec-16     | 4-Jan-18      | 1       |            | Lactobacillus rhamnosus       | Lactobacillus rhamnosus            | 1492   | 0           | IN4121                 | genomic DNA |            |                                                                                                               | 1         | 1492    | FALSE   | ncbi_filtered | 47715   |
| KJ88966_1_1323                  | 47715   | KJ88966         | Lactobacillus rhamnosus strain 7017 16S ribosomal RNA gene, partial sequence                                 | 31-Aug-14     | 4-Jan-18      | 1       |            | Lactobacillus rhamnosus       | Lactobacillus rhamnosus            | 1323   | 0           | 7017                   | genomic DNA |            | curd sample                                                                                                   | 1         | 1323    | FALSE   | ncbi_filtered | 47715   |
| KU315061_1_1498                 | 47715   | KU315061        | Lactobacillus rhamnosus strain TPS 16S ribosomal RNA gene, partial sequence                                  | 26-Apr-16     | 4-Jan-18      | 1       |            | Lactobacillus rhamnosus       | Lactobacillus rhamnosus            | 1498   | 0           | TP5                    | genomic DNA |            | Tuna persia cheese                                                                                            | 1         | 1498    | FALSE   | ncbi_filtered | 47715   |
| AB876545_1_1489                 | 47770   | AB876545        | Lactobacillus crispatus gene for 16S ribosomal RNA, partial sequence, strain BC4                             | 20-Feb-16     | 4-Jan-18      | 1       |            | Lactobacillus crispatus       | Lactobacillus crispatus            | 1508   | 0           | BC4                    | genomic DNA |            | vaginal swab                                                                                                  | 1         | 1508    | FALSE   | ncbi_filtered | 47770   |
| EF120374_1_1550                 | 47770   | EF120374        | Lactobacillus crispatus strain LAB32 16S ribosomal RNA gene, partial sequence                                | 3-Sep-07      | 4-Jan-18      | 1       |            | Lactobacillus crispatus       | Lactobacillus crispatus            | 1550   | 0           | LAB32                  | genomic DNA |            |                                                                                                               | 1         | 1550    | FALSE   | ncbi_filtered | 47770   |
| KF661292_1_1425                 | 47770   |                 |                                                                                                              |               |               |         |            |                               |                                    |        |             |                        |             |            |                                                                                                               |           |         |         |               |         |

| seqname                        | tax_id  | accession       | description                                                                                        | modified_date | download_date | version_num | source                                                         | keywords                               | organism                                       | length | ambig_count | strain             | mol_type    | isolate      | isolation_source                                                                                         | seq_start | seq_stop | is_type | collection    | species |
|--------------------------------|---------|-----------------|----------------------------------------------------------------------------------------------------|---------------|---------------|-------------|----------------------------------------------------------------|----------------------------------------|------------------------------------------------|--------|-------------|--------------------|-------------|--------------|----------------------------------------------------------------------------------------------------------|-----------|----------|---------|---------------|---------|
| JQ351770_1_1355                | 47886   | JQ351770        | <i>Pseudomonas luteola</i> strain CBN-1 16S ribosomal RNA gene, partial sequence                   | 18-Apr-12     | 4-Jan-18      | 1           | Pseudomonas luteola                                            |                                        | <i>Pseudomonas luteola</i>                     | 1355   | 0           | CBN-1              | genomic DNA |              |                                                                                                          | 1         | 1355     | FALSE   | ncbi_filtered | 47886   |
| KF360602_1_1496                | 47886   | KF360602        | <i>Pseudomonas luteola</i> strain BSP10 16S ribosomal RNA gene, partial sequence                   | 12-Aug-13     | 4-Jan-18      | 1           | Pseudomonas luteola                                            |                                        | <i>Pseudomonas luteola</i>                     | 1496   | 0           | BSP10              | genomic DNA |              | soils                                                                                                    | 1         | 1496     | FALSE   | ncbi_filtered | 47886   |
| KO301304_1_1506                | 47886   | KO301304        | <i>Pseudomonas luteola</i> strain SIC49 16S ribosomal RNA gene, partial sequence                   | 31-Dec-16     | 4-Jan-18      | 1           | Pseudomonas luteola                                            |                                        | <i>Pseudomonas luteola</i>                     | 1506   | 0           | SIC49              | genomic DNA |              | Sediment of San Jeronimo Monastery                                                                       | 1         | 1506     | FALSE   | ncbi_filtered | 47886   |
| NZ_BDAE0100066_457_1998        | 1215106 | NZ_BDAE0100066  | <i>Pseudomonas luteola</i> NBRC 103146, whole genome shotgun sequence                              | 17-Apr-17     | 4-Jan-18      | 1           | Pseudomonas luteola NBRC 103146                                | WGS;STANDARD_DRAFT;RefSeq              | <i>Pseudomonas luteola</i> NBRC 103146         | 1542   | 0           | NBRC 103146        | genomic DNA |              |                                                                                                          | 457       | 1998     | TRUE    | ncbi_filtered | 47886   |
| AY279002_1_1358                | 47917   | AY279002        | <i>Serratia fonticola</i> partial 16S rRNA gene, strain IB4                                        | 18-Apr-01     | 4-Jan-18      | 1           | <i>Serratia fonticola</i>                                      | 16S ribosomal RNA;16S rRNA gene        | <i>Serratia fonticola</i>                      | 1358   | 0           | IB4                | genomic DNA |              |                                                                                                          | 1         | 1358     | FALSE   | ncbi_filtered | 47917   |
| AY235502_1_1489                | 47917   | AY235502        | <i>Serratia fonticola</i> UTAD54 16S ribosomal RNA gene, partial sequence                          | 24-Jan-03     | 4-Jan-18      | 1           | <i>Serratia fonticola</i>                                      |                                        | <i>Serratia fonticola</i>                      | 1489   | 0           |                    | genomic DNA | UTAD54       | drinking water                                                                                           | 1         | 1489     | FALSE   | ncbi_filtered | 47917   |
| KJ726547_1_1397                | 47917   | KJ726547        | <i>Serratia fonticola</i> strain Amp16 16S ribosomal RNA gene, partial sequence                    | 6-Jul-14      | 4-Jan-18      | 1           | <i>Serratia fonticola</i>                                      |                                        | <i>Serratia fonticola</i>                      | 1397   | 0           | Amp16              | genomic DNA |              | intestine                                                                                                | 1         | 1397     | FALSE   | ncbi_filtered | 47917   |
| KU711982_1_1383                | 47917   | KU711982        | <i>Serratia fonticola</i> strain NHHS052 16S ribosomal RNA gene, partial sequence                  | 29-May-16     | 4-Jan-18      | 1           | <i>Serratia fonticola</i>                                      |                                        | <i>Serratia fonticola</i>                      | 1383   | 0           | NHHS052            | genomic DNA |              | gut of arthropod                                                                                         | 1         | 1383     | FALSE   | ncbi_filtered | 47917   |
| MG190848_1_1205                | 47917   | MG190848        | <i>Serratia fonticola</i> strain CP_D9 16S ribosomal RNA gene, partial sequence                    | 18-Dec-17     | 4-Jan-18      | 1           | <i>Serratia fonticola</i>                                      |                                        | <i>Serratia fonticola</i>                      | 1205   | 0           | CP_D9              | genomic DNA |              | Coregonus peled                                                                                          | 1         | 1205     | FALSE   | ncbi_filtered | 47917   |
| GQ284424_1_1501                | 47920   | GQ284424        | <i>Acidovorax delafieldii</i> strain THWCNS2 16S ribosomal RNA gene, partial sequence              | 29-Jul-09     | 4-Jan-18      | 1           | <i>Acidovorax delafieldii</i>                                  |                                        | <i>Acidovorax delafieldii</i>                  | 1501   | 0           | THWCNS2            | genomic DNA |              | sediment sample of natural spring                                                                        | 1         | 1501     | FALSE   | ncbi_filtered | 47920   |
| GQ284429_1_1474                | 47920   | GQ284429        | <i>Acidovorax delafieldii</i> strain THWCNS24 16S ribosomal RNA gene, partial sequence             | 29-Jul-09     | 4-Jan-18      | 1           | <i>Acidovorax delafieldii</i>                                  |                                        | <i>Acidovorax delafieldii</i>                  | 1474   | 0           | THWCNS24           | genomic DNA |              | sediment sample of natural spring                                                                        | 1         | 1474     | FALSE   | ncbi_filtered | 47920   |
| GQ284430_1_1470                | 47920   | GQ284430        | <i>Acidovorax delafieldii</i> strain THWCNS8 16S ribosomal RNA gene, partial sequence              | 29-Jul-09     | 4-Jan-18      | 1           | <i>Acidovorax delafieldii</i>                                  |                                        | <i>Acidovorax delafieldii</i>                  | 1470   | 0           | THWCNS8            | genomic DNA |              | sediment sample of natural spring                                                                        | 1         | 1470     | FALSE   | ncbi_filtered | 47920   |
| MF156928_1_1273                | 47920   | MF156928        | <i>Acidovorax delafieldii</i> strain A3 16S ribosomal RNA gene, partial sequence                   | 30-May-17     | 4-Jan-18      | 1           | <i>Acidovorax delafieldii</i>                                  |                                        | <i>Acidovorax delafieldii</i>                  | 1273   | 0           | A3                 | genomic DNA |              | activated sludge                                                                                         | 1         | 1273     | FALSE   | ncbi_filtered | 47920   |
| NZ_ACOQT0100424_160_1696       | 573060  | NZ_ACOQT0100424 | <i>Acidovorax delafieldii</i> ZAN c000941, whole genome shotgun sequence                           | 16-Nov-17     | 4-Jan-18      | 1           | <i>Acidovorax delafieldii</i> ZAN                              | WGS;RefSeq                             | <i>Acidovorax delafieldii</i> ZAN              | 1537   | 0           | ZAN                | genomic DNA |              |                                                                                                          | 160       | 1696     | FALSE   | ncbi_filtered | 47920   |
| K7749411_1_1360                | 48296   | K7749411        | <i>Acinetobacter pittii</i> strain WB-222 16S ribosomal RNA gene, partial sequence                 | 26-Jan-14     | 4-Jan-18      | 1           | <i>Acinetobacter pittii</i>                                    |                                        | <i>Acinetobacter pittii</i>                    | 1360   | 0           | WB-222             | genomic DNA |              |                                                                                                          | 1         | 1360     | FALSE   | ncbi_filtered | 48296   |
| K748634_1_1503                 | 48296   | K748634         | <i>Acinetobacter pittii</i> strain BR_12 16S ribosomal RNA gene, partial sequence                  | 8-Mar-16      | 4-Jan-18      | 1           | <i>Acinetobacter pittii</i>                                    |                                        | <i>Acinetobacter pittii</i>                    | 1503   | 0           | BR_12              | genomic DNA |              | Upper Ganges River water sample                                                                          | 1         | 1503     | FALSE   | ncbi_filtered | 48296   |
| K1922994_1_1436                | 48296   | K1922994        | <i>Acinetobacter pittii</i> strain W26 16S ribosomal RNA gene, partial sequence                    | 7-Aug-17      | 4-Jan-18      | 1           | <i>Acinetobacter pittii</i>                                    |                                        | <i>Acinetobacter pittii</i>                    | 1436   | 0           | W26                | genomic DNA |              | fish                                                                                                     | 1         | 1436     | FALSE   | ncbi_filtered | 48296   |
| MG818963_1_1483                | 48296   | MG818963        | <i>Acinetobacter pittii</i> strain FA-6 16S ribosomal RNA gene, partial sequence                   | 27-Jan-18     | 14-Feb-18     | 1           | <i>Acinetobacter pittii</i>                                    |                                        | <i>Acinetobacter pittii</i>                    | 1483   | 0           | FA-6               | genomic DNA |              | Patients                                                                                                 | 1         | 1483     | FALSE   | ncbi_filtered | 48296   |
| NC_016603_3221374_3322903      | 871585  | NC_016603       | <i>Acinetobacter pittii</i> PHEA-2 chromosome, complete genome                                     | 24-Aug-16     | 4-Jan-18      | 1           | <i>Acinetobacter pittii</i> PHEA-2                             | RefSeq                                 | <i>Acinetobacter pittii</i> PHEA-2             | 1530   | 0           | PHEA-2             | genomic DNA |              |                                                                                                          | 3221374   | 3322903  | FALSE   | ncbi_filtered | 48296   |
| JF459965_1_1369                | 48936   | JF459965        | <i>Novosphingobium subterraneum</i> strain WSAR49 16S ribosomal RNA gene, partial sequence         | 12-Mar-13     | 4-Jan-18      | 1           | <i>Novosphingobium subterraneum</i> (Sphingomonas subterranea) |                                        | <i>Novosphingobium subterraneum</i>            | 1369   | 0           | WSAR49             | genomic DNA |              | water treatment plant - treated water                                                                    | 1         | 1369     | FALSE   | ncbi_filtered | 48936   |
| JF459970_1_1451                | 48936   | JF459970        | <i>Novosphingobium subterraneum</i> strain B1AT18 16S ribosomal RNA gene, partial sequence         | 10-Mar-13     | 4-Jan-18      | 1           | <i>Novosphingobium subterraneum</i> (Sphingomonas subterranea) |                                        | <i>Novosphingobium subterraneum</i>            | 1451   | 0           | B1AT18             | genomic DNA |              | biofilm                                                                                                  | 1         | 1451     | FALSE   | ncbi_filtered | 48936   |
| K7345633_1_1371                | 48936   | K7345633        | <i>Novosphingobium subterraneum</i> strain U42 16S ribosomal RNA gene, partial sequence            | 12-Nov-15     | 4-Jan-18      | 1           | <i>Novosphingobium subterraneum</i> (Sphingomonas subterranea) |                                        | <i>Novosphingobium subterraneum</i>            | 1471   | 0           | U42                | genomic DNA |              | hot spring                                                                                               | 1         | 1371     | FALSE   | ncbi_filtered | 48936   |
| KU258276_1_1431                | 48936   | KU258276        | <i>Novosphingobium subterraneum</i> strain BL25 16S ribosomal RNA gene, partial sequence           | 12-Mar-16     | 4-Jan-18      | 1           | <i>Novosphingobium subterraneum</i> (Sphingomonas subterranea) |                                        | <i>Novosphingobium subterraneum</i>            | 1431   | 0           | BL25               | genomic DNA |              | lithic environment                                                                                       | 1         | 1431     | FALSE   | ncbi_filtered | 48936   |
| NZ_BCFZ0100083_4115_5606       | 1219057 | NZ_BCFZ0100083  | <i>Novosphingobium subterraneum</i> NBRC 16086, whole genome shotgun sequence                      | 12-Apr-17     | 4-Jan-18      | 1           | <i>Novosphingobium subterraneum</i> NBRC 16086                 | WGS;STANDARD_DRAFT;RefSeq              | <i>Novosphingobium subterraneum</i> NBRC 16086 | 1492   | 0           | NBRC 16086         | genomic DNA |              |                                                                                                          | 4115      | 5606     | TRUE    | ncbi_filtered | 48936   |
| NR_037119_1_1451               | 50715   | NR_037119       | <i>Acidiphtheria rubrifaciens</i> HS-AP3 16S ribosomal RNA gene, partial sequence                  | 3-Feb-15      | 4-Jan-18      | 1           | <i>Acidiphtheria rubrifaciens</i>                              | RefSeq                                 | <i>Acidiphtheria rubrifaciens</i>              | 1451   | 1           | HS-AP3;JCM 10600   | rRNA        |              |                                                                                                          | 1         | 1451     | TRUE    | ncbi_filtered | 50715   |
| NZ_BANB0100083_292_1786        | 1231350 | NZ_BANB0100083  | <i>Acidiphtheria rubrifaciens</i> HS-AP3, whole genome shotgun sequence                            | 17-Apr-17     | 4-Jan-18      | 1           | <i>Acidiphtheria rubrifaciens</i> HS-AP3                       | WGS;RefSeq;STANDARD_DRAFT              | <i>Acidiphtheria rubrifaciens</i> HS-AP3       | 1495   | 0           | HS-AP3             | genomic DNA |              |                                                                                                          | 292       | 1786     | TRUE    | ncbi_filtered | 50715   |
| AB680259_1_1475                | 51665   | AB680259        | <i>Aerococcus urinaeequi</i> gene for 16S rRNA, partial sequence, strain: NBRC 12216               | 28-Jan-12     | 4-Jan-18      | 1           | <i>Aerococcus urinaeequi</i>                                   |                                        | <i>Aerococcus urinaeequi</i>                   | 1475   | 1           | NBRC 12216         | genomic DNA |              |                                                                                                          | 1         | 1475     | FALSE   | ncbi_filtered | 51665   |
| KC634295_1_1210                | 51665   | KC634295        | <i>Aerococcus urinaeequi</i> strain OST1 16S ribosomal RNA gene, partial sequence                  | 26-Nov-13     | 4-Jan-18      | 1           | <i>Aerococcus urinaeequi</i>                                   |                                        | <i>Aerococcus urinaeequi</i>                   | 1210   | 0           | OST1               | genomic DNA |              |                                                                                                          | 1         | 1210     | FALSE   | ncbi_filtered | 51665   |
| KF817696_1_1394                | 51665   | KF817696        | <i>Aerococcus urinaeequi</i> strain AM-84 16S ribosomal RNA gene, partial sequence                 | 27-Jan-14     | 4-Jan-18      | 1           | <i>Aerococcus urinaeequi</i>                                   |                                        | <i>Aerococcus urinaeequi</i>                   | 1394   | 0           | AM-84              | genomic DNA |              |                                                                                                          | 1         | 1394     | FALSE   | ncbi_filtered | 51665   |
| K9197341_1_1286                | 51665   | K9197341        | <i>Aerococcus urinaeequi</i> strain STF_NIO_9 16S ribosomal RNA gene, partial sequence             | 26-Aug-14     | 4-Jan-18      | 1           | <i>Aerococcus urinaeequi</i>                                   |                                        | <i>Aerococcus urinaeequi</i>                   | 1286   | 0           | STF_NIO_9          | genomic DNA |              | seawater from subtropical front of the Indian sector of the Southern Ocean                               | 1         | 1286     | FALSE   | ncbi_filtered | 51665   |
| K7261128_1_1428                | 51665   | K7261128        | <i>Aerococcus urinaeequi</i> strain RCB916 16S ribosomal RNA gene, partial sequence                | 19-Sep-15     | 4-Jan-18      | 1           | <i>Aerococcus urinaeequi</i>                                   |                                        | <i>Aerococcus urinaeequi</i>                   | 1428   | 0           | RCB916             | genomic DNA |              | bat guano                                                                                                | 1         | 1428     | FALSE   | ncbi_filtered | 51665   |
| LN624398_1_1539                | 52769   | LN624398        | <i>Actinomyces gerencerisae</i> partial 16S rRNA gene, isolate Urmit                               | 14-Dec-14     | 4-Jan-18      | 1           | <i>Actinomyces gerencerisae</i>                                |                                        | <i>Actinomyces gerencerisae</i>                | 1539   | 0           |                    | genomic DNA | Urmit        | hip prosthesis collection                                                                                | 1         | 1539     | FALSE   | ncbi_filtered | 52769   |
| NR_029280_1_1379               | 52769   | NR_029280       | <i>Actinomyces gerencerisae</i> strain 2-606-032 16S ribosomal RNA gene, partial sequence          | 3-Feb-15      | 4-Jan-18      | 1           | <i>Actinomyces gerencerisae</i>                                | RefSeq                                 | <i>Actinomyces gerencerisae</i>                | 1379   | 1           | 2-606-032;DSM 6844 | rRNA        |              |                                                                                                          | 1         | 1379     | TRUE    | ncbi_filtered | 52769   |
| NZ_AUBN0100027_203_1785        | 1120943 | NZ_AUBN0100027  | G448DRAT_scaffold00024_2_c, whole genome shotgun sequence                                          | 17-Apr-17     | 4-Jan-18      | 1           | <i>Actinomyces gerencerisae</i> DSM 6844                       | WGS;IMPROVED_HIGH_QUALITY_DRAFT;RefSeq | <i>Actinomyces gerencerisae</i> DSM 6844       | 1583   | 0           | DSM 6844           | genomic DNA |              |                                                                                                          | 203       | 1785     | TRUE    | ncbi_filtered | 52769   |
| NR_026299_1_1404               | 58530   | NR_026299       | <i>Brevibacterium mcbrelii</i> ATCC 49030 16S ribosomal RNA gene, partial sequence                 | 3-Feb-15      | 4-Jan-18      | 1           | <i>Brevibacterium mcbrelii</i> ATCC 49030                      |                                        | <i>Brevibacterium mcbrelii</i> ATCC 49030      | 1404   | 10          | ATCC 49030         | rRNA        |              |                                                                                                          | 1         | 1404     | TRUE    | ncbi_filtered | 53363   |
| NZ_ADNU0100076_3_1528          | 58530   | NZ_ADNU0100076  | <i>Brevibacterium mcbrelii</i> ATCC 49030 contig00111, whole genome shotgun sequence               | 17-Apr-17     | 4-Jan-18      | 1           | <i>Brevibacterium mcbrelii</i> ATCC 49030                      | WGS;HIGH_QUALITY_DRAFT;RefSeq          | <i>Brevibacterium mcbrelii</i> ATCC 49030      | 1526   | 0           | ATCC 49030         | genomic DNA |              | biological product (ENVO:0200043)                                                                        | 3         | 1528     | TRUE    | ncbi_filtered | 53363   |
| AB234868_1_1237                | 53374   | AB234868        | <i>Corynebacterium coyleae</i> gene for 16S ribosomal RNA, partial sequence                        | 13-Sep-05     | 4-Jan-18      | 1           | <i>Corynebacterium coyleae</i>                                 |                                        | <i>Corynebacterium coyleae</i>                 | 1237   | 0           |                    | genomic DNA |              |                                                                                                          | 1         | 1237     | FALSE   | ncbi_filtered | 53374   |
| EU434595_1_1446                | 53374   | EU434595        | <i>Corynebacterium coyleae</i> strain e40 16S ribosomal RNA gene, partial sequence                 | 3-Jun-09      | 4-Jan-18      | 1           | <i>Corynebacterium coyleae</i>                                 |                                        | <i>Corynebacterium coyleae</i>                 | 1446   | 0           | e40                | genomic DNA |              | upstream of the river which received the effluent of an antibiotic production wastewater treatment plant | 1         | 1446     | FALSE   | ncbi_filtered | 53374   |
| NZ_FNRU0100002_1783858_1785385 | 53374   | NZ_FNRU0100002  | <i>Corynebacterium coyleae</i> strain DSM 44184, whole genome shotgun sequence                     | 21-Oct-17     | 4-Jan-18      | 1           | <i>Corynebacterium coyleae</i>                                 | WGS;RefSeq                             | <i>Corynebacterium coyleae</i>                 | 1528   | 0           | DSM 44184          | genomic DNA |              |                                                                                                          | 1783858   | 1785385  | TRUE    | ncbi_filtered | 53374   |
| NZ_FNRU0100002_2290179_2291705 | 53374   | NZ_FNRU0100002  | <i>Corynebacterium coyleae</i> strain DSM 44184, whole genome shotgun sequence                     | 21-Oct-17     | 4-Jan-18      | 1           | <i>Corynebacterium coyleae</i>                                 | WGS;RefSeq                             | <i>Corynebacterium coyleae</i>                 | 1527   | 0           | DSM 44184          | genomic DNA |              |                                                                                                          | 2290179   | 2291705  | TRUE    | ncbi_filtered | 53374   |
| NZ_FNRU0100002_917545_919072   | 53374   | NZ_FNRU0100002  | <i>Corynebacterium coyleae</i> strain DSM 44184, whole genome shotgun sequence                     | 21-Oct-17     | 4-Jan-18      | 1           | <i>Corynebacterium coyleae</i>                                 | WGS;RefSeq                             | <i>Corynebacterium coyleae</i>                 | 1528   | 0           | DSM 44184          | genomic DNA |              |                                                                                                          | 917545    | 919072   | TRUE    | ncbi_filtered | 53374   |
| K7380597_1_1427                | 53412   | K7380597        | <i>Pseudomonas resinovorans</i> strain S7 16S ribosomal RNA gene, partial sequence                 | 10-Jan-16     | 4-Jan-18      | 1           | <i>Pseudomonas resinovorans</i>                                |                                        | <i>Pseudomonas resinovorans</i>                | 1427   | 0           | S7                 | genomic DNA |              | sediment in langshui river of beijing                                                                    | 1         | 1427     | FALSE   | ncbi_filtered | 53412   |
| K7380599_1_1430                | 53412   | K7380599        | <i>Pseudomonas resinovorans</i> strain S9 16S ribosomal RNA gene, partial sequence                 | 10-Jan-16     | 4-Jan-18      | 1           | <i>Pseudomonas resinovorans</i>                                |                                        | <i>Pseudomonas resinovorans</i>                | 1430   | 0           | S9                 | genomic DNA |              | sediment in langshui river of beijing                                                                    | 1         | 1430     | FALSE   | ncbi_filtered | 53412   |
| KU179375_1_1479                | 53412   | KU179375        | <i>Pseudomonas resinovorans</i> strain L57 16S ribosomal RNA gene, partial sequence                | 5-Apr-16      | 4-Jan-18      | 1           | <i>Pseudomonas resinovorans</i>                                |                                        | <i>Pseudomonas resinovorans</i>                | 1479   | 0           | L57                | genomic DNA |              | intestinal tract of Pheretima caeosia in mount Emei                                                      | 1         | 1479     | FALSE   | ncbi_filtered | 53412   |
| LN867286_1_1438                | 53412   | LN867286        | <i>Pseudomonas resinovorans</i> partial 16S rRNA gene, isolate 0913CV11KN51                        | 1-Oct-15      | 4-Jan-18      | 1           | <i>Pseudomonas resinovorans</i>                                |                                        | <i>Pseudomonas resinovorans</i>                | 1438   | 0           |                    | genomic DNA | 0913CV11KN51 |                                                                                                          | 1         | 1438     | FALSE   | ncbi_filtered | 53412   |
| NR_026534_1_1438               | 53412   | NR_026534       | <i>Pseudomonas resinovorans</i> strain LMG 2274 16S ribosomal RNA gene, partial sequence           | 3-Feb-15      | 4-Jan-18      | 1           | <i>Pseudomonas resinovorans</i>                                | RefSeq                                 | <i>Pseudomonas resinovorans</i>                | 1465   | 8           | LMG 2274           | rRNA        |              |                                                                                                          | 1         | 1465     | TRUE    | ncbi_filtered | 53412   |
| AB695346_1_1365                | 53972   | AB695346        | <i>Rhodococcus corynebacterioides</i> gene for 16S ribosomal RNA, partial sequence, isolate: B0840 | 1-Feb-12      | 4-Jan-18      | 1           | <i>Rhodococcus corynebacterioides</i>                          |                                        | <i>Rhodococcus corynebacterioides</i>          | 1368   | 0           |                    | genomic DNA | B0840        | apple leaf                                                                                               | 1         | 1368     | FALSE   | ncbi_filtered | 53972   |
| AY167850_1_1334                | 53972   | AY167850        | <i>Rhodococcus corynebacterioides</i> strain SAFR-015 16S ribosomal RNA gene, partial sequence     | 9-Feb-09      | 4-Jan-18      | 1           |                                                                |                                        |                                                |        |             |                    |             |              |                                                                                                          |           |          |         |               |         |



| seqname                    | tax_id  | accession       | description                                                                                                | modified_date | download_date | version | num | source                                                   | keywords                      | organism                                                 | length | ambig_count | strain             | mol_type    | isolate                                                                  | isolation_source                                     | seq_start | seq_stop | is_type | collection    | species |
|----------------------------|---------|-----------------|------------------------------------------------------------------------------------------------------------|---------------|---------------|---------|-----|----------------------------------------------------------|-------------------------------|----------------------------------------------------------|--------|-------------|--------------------|-------------|--------------------------------------------------------------------------|------------------------------------------------------|-----------|----------|---------|---------------|---------|
| KC139425_1_1433            | 55211   | KC139425        | Erwinia persicina strain h-5 16S ribosomal RNA gene, partial sequence                                      | 5-Feb-13      | 4-Jan-18      | 1       |     | Erwinia persicina                                        |                               | Erwinia persicina                                        | 1433   | 0           | h-5                | genomic DNA |                                                                          |                                                      | 1         | 1433     | FALSE   | ncbi_filtered | 55211   |
| KC762218_1_1373            | 55211   | KC762218        | Erwinia persicina strain XH1102230201 16S ribosomal RNA gene, partial sequence                             | 27-Apr-13     | 4-Jan-18      | 1       |     | Erwinia persicina                                        |                               | Erwinia persicina                                        | 1373   | 0           | XH1102230201       | genomic DNA |                                                                          |                                                      | 1         | 1373     | FALSE   | ncbi_filtered | 55211   |
| NR_026049_1_1456           | 55211   | NR_026049       | Erwinia persicina strain HK 204 16S ribosomal RNA gene, partial sequence                                   | 3-Feb-15      | 4-Jan-18      | 1       |     | Erwinia persicina                                        | RefSeq                        | Erwinia persicina                                        | 1456   | 0           | HK 204; ATCC 35998 | rRNA        |                                                                          |                                                      | 1         | 1456     | TRUE    | ncbi_filtered | 55211   |
| AM942547_1_1293            | 55508   | AM942547        | Janthinobacterium agaricidammosum strain Jan1 16S ribosomal RNA gene, partial sequence                     | 16-Feb-10     | 4-Jan-18      | 1       |     | Janthinobacterium agaricidammosum                        |                               | Janthinobacterium agaricidammosum                        | 1293   | 2           | 3-Jan              | genomic DNA | CM1-29                                                                   | borehole 59, depth 9m, coal-tar contaminated aquifer | 1         | 1293     | FALSE   | ncbi_filtered | 55508   |
| A1167838_1_1436            | 55508   | A1167838        | Janthinobacterium agaricidammosum strain SAFR-022 16S ribosomal RNA gene, partial sequence                 | 9-Feb-09      | 4-Jan-18      | 1       |     | Janthinobacterium agaricidammosum                        |                               | Janthinobacterium agaricidammosum                        | 1436   | 8           | SAFR-022           | genomic DNA |                                                                          |                                                      | 1         | 1436     | FALSE   | ncbi_filtered | 55508   |
| JN652994_1_1384            | 55508   | JN652994        | Janthinobacterium agaricidammosum strain hp32 16S ribosomal RNA gene, partial sequence                     | 19-Oct-11     | 4-Jan-18      | 1       |     | Janthinobacterium agaricidammosum                        |                               | Janthinobacterium agaricidammosum                        | 1384   | 0           | hp32               | genomic DNA |                                                                          |                                                      | 1         | 1384     | FALSE   | ncbi_filtered | 55508   |
| KM658472_1_1388            | 55508   | KM658472        | Janthinobacterium agaricidammosum strain MAS001 16S ribosomal RNA gene, partial sequence                   | 19-Jan-15     | 4-Jan-18      | 1       |     | Janthinobacterium agaricidammosum                        |                               | Janthinobacterium agaricidammosum                        | 1388   | 0           | MAS001             | genomic DNA |                                                                          | Pellicella membranacea                               | 1         | 1388     | FALSE   | ncbi_filtered | 55508   |
| NZ_BCTH01000154_176_1716   | 134967  | NZ_BCTH01000154 | Janthinobacterium agaricidammosum NBRC 102515 = DSM 9628 strain NBRC 102515, whole genome shotgun sequence | 12-Apr-17     | 4-Jan-18      | 1       |     | Janthinobacterium agaricidammosum NBRC 102515 = DSM 9628 | WGS;STANDARD_DRAFT;RefSeq     | Janthinobacterium agaricidammosum NBRC 102515 = DSM 9628 | 1541   | 0           | NBRC 102515        | genomic DNA |                                                                          |                                                      | 176       | 1716     | TRUE    | ncbi_filtered | 55508   |
| JF803550_1_1370            | 55565   | JF803550        | Actinomyces graevenitzi strain C549 16S ribosomal RNA gene, partial sequence                               | 8-May-11      | 4-Jan-18      | 1       |     | Actinomyces graevenitzi                                  |                               | Actinomyces graevenitzi                                  | 1370   | 0           | C549               | genomic DNA |                                                                          | cystic fibrosis sputum                               | 1         | 1370     | FALSE   | ncbi_filtered | 55565   |
| NR_042167_1_1413           | 55565   | NR_042167       | Actinomyces graevenitzi strain CCG 27294 16S ribosomal RNA gene, partial sequence                          | 24-Oct-17     | 4-Jan-18      | 1       |     | Actinomyces graevenitzi                                  | RefSeq                        | Actinomyces graevenitzi                                  | 1413   | 0           | CCUG 27294         | rRNA        |                                                                          |                                                      | 1         | 1413     | TRUE    | ncbi_filtered | 55565   |
| NZ_JH470342_4061_5607      | 435830  | NZ_JH470342     | Actinomyces graevenitzi C83 supercont1.5, whole genome shotgun sequence                                    | 7-Apr-17      | 4-Jan-18      | 1       |     | Actinomyces graevenitzi C83                              | WGS;HIGH_QUALITY_DRAFT;RefSeq | Actinomyces graevenitzi C83                              | 1547   | 0           | C83                | genomic DNA |                                                                          | biological product (ENVO:02000043)                   | 4061      | 5607     | FALSE   | ncbi_filtered | 55565   |
| NZ_K951496_3430_4978       | 1321817 | NZ_K951496      | Actinomyces graevenitzi F0530 Scaffold049, whole genome shotgun sequence                                   | 9-Apr-17      | 4-Jan-18      | 1       |     | Actinomyces graevenitzi F0530                            | WGS;HIGH_QUALITY_DRAFT;RefSeq | Actinomyces graevenitzi F0530                            | 1549   | 0           | F0530              | genomic DNA |                                                                          | oral cavity-mouth                                    | 3430      | 4978     | FALSE   | ncbi_filtered | 55565   |
| PNHV01000006_110949_112493 | 55565   | PNHV01000006    | Actinomyces graevenitzi strain LIMB0286 ERR1203671.17957_1_B3.6, whole genome shotgun sequence             | 10-Jan-18     | 12-Jan-18     | 1       |     | Actinomyces graevenitzi                                  | WGS                           | Actinomyces graevenitzi                                  | 1545   | 0           | UMB0286            | genomic DNA |                                                                          | catheter                                             | 110949    | 112493   | FALSE   | ncbi_filtered | 55565   |
| AY849429_1_1467            | 56192   | AY849429        | Photobacterium illopicarium strain NCIMB 13476 16S ribosomal RNA gene, partial sequence                    | 24-Jun-09     | 4-Jan-18      | 1       |     | Photobacterium illopicarium                              |                               | Photobacterium illopicarium                              | 1467   | 2           | NCIMB 13476        | genomic DNA |                                                                          | spoiled cod fillet                                   | 1         | 1467     | FALSE   | ncbi_filtered | 56192   |
| AY849431_1_1467            | 56192   | AY849431        | Photobacterium illopicarium strain NCIMB 13481 16S ribosomal RNA gene, partial sequence                    | 24-Jun-09     | 4-Jan-18      | 1       |     | Photobacterium illopicarium                              |                               | Photobacterium illopicarium                              | 1467   | 4           | NCIMB 13481        | genomic DNA |                                                                          | spoiled cod fillet                                   | 1         | 1467     | FALSE   | ncbi_filtered | 56192   |
| AY849432_1_1467            | 56192   | AY849432        | Photobacterium illopicarium strain ATCC 51761 16S ribosomal RNA gene, partial sequence                     | 24-Jun-09     | 4-Jan-18      | 1       |     | Photobacterium illopicarium                              |                               | Photobacterium illopicarium                              | 1467   | 9           | ATCC 51761         | genomic DNA |                                                                          | Salmo salar pyloric caecum                           | 1         | 1467     | FALSE   | ncbi_filtered | 56192   |
| NR_043067_1_1467           | 56192   | NR_043067       | Photobacterium illopicarium strain ATCC 51760 16S ribosomal RNA gene, partial sequence                     | 3-Feb-15      | 4-Jan-18      | 1       |     | Photobacterium illopicarium                              | RefSeq                        | Photobacterium illopicarium                              | 1467   | 3           | ATCC 51760         | rRNA        |                                                                          | pyloric caeca                                        | 1         | 1467     | TRUE    | ncbi_filtered | 56192   |
| NR_111990_1_1410           | 56192   | NR_111990       | Photobacterium illopicarium strain ATCC 51760 16S ribosomal RNA gene, partial sequence                     | 3-Feb-15      | 4-Jan-18      | 1       |     | Photobacterium illopicarium                              | RefSeq                        | Photobacterium illopicarium                              | 1410   | 3           | ATCC 51760         | rRNA        |                                                                          |                                                      | 1         | 1410     | TRUE    | ncbi_filtered | 56192   |
| EF371496_1_1452            | 56976   | EF371496        | Aflipa genosp. 1 clone MRT-114 16S ribosomal RNA gene, partial sequence                                    | 11-Feb-07     | 4-Jan-18      | 1       |     | Aflipa genosp. 1                                         |                               | Aflipa genosp. 1                                         | 1452   | 0           |                    | genomic DNA |                                                                          | Jiaozhou Bay                                         | 1         | 1452     | FALSE   | ncbi_filtered | 56976   |
| U87762_1_1475              | 56976   | U87762          | Aflipa genosp. 1 strain G6457 16S ribosomal RNA gene, partial sequence                                     | 2-Aug-97      | 4-Jan-18      | 1       |     | Aflipa genosp. 1                                         |                               | Aflipa genosp. 1                                         | 1475   | 0           | G6457              | genomic DNA |                                                                          |                                                      | 1         | 1475     | FALSE   | ncbi_filtered | 56976   |
| U87763_1_1460              | 56976   | U87763          | Aflipa genosp. 1 strain F872 16S ribosomal RNA gene, partial sequence                                      | 2-Aug-97      | 4-Jan-18      | 1       |     | Aflipa genosp. 1                                         |                               | Aflipa genosp. 1                                         | 1460   | 0           | F872               | genomic DNA |                                                                          |                                                      | 1         | 1460     | FALSE   | ncbi_filtered | 56976   |
| U87764_1_1473              | 56977   | U87764          | Aflipa genosp. 2 strain G8965 16S ribosomal RNA gene, partial sequence                                     | 2-Aug-97      | 4-Jan-18      | 1       |     | Aflipa genosp. 2                                         |                               | Aflipa genosp. 2                                         | 1473   | 0           | G8965              | genomic DNA |                                                                          |                                                      | 1         | 1473     | FALSE   | ncbi_filtered | 56977   |
| U87765_1_1483              | 56977   | U87765          | Aflipa genosp. 2 strain G4438 16S ribosomal RNA gene, partial sequence                                     | 2-Aug-97      | 4-Jan-18      | 1       |     | Aflipa genosp. 2                                         |                               | Aflipa genosp. 2                                         | 1483   | 1           | G4438              | genomic DNA |                                                                          |                                                      | 1         | 1483     | FALSE   | ncbi_filtered | 56977   |
| U87772_1_1455              | 56981   | U87772          | Aflipa genosp. 6 16S ribosomal RNA gene, partial sequence                                                  | 2-Aug-97      | 4-Jan-18      | 1       |     | Aflipa genosp. 6                                         |                               | Aflipa genosp. 6                                         | 1455   | 0           | G8665              | genomic DNA |                                                                          |                                                      | 1         | 1455     | FALSE   | ncbi_filtered | 56981   |
| KU258254_1_1421            | 57002   | KU258254        | Amaricoccus tamworthensis strain BL3 16S ribosomal RNA gene, partial sequence                              | 12-Mar-16     | 4-Jan-18      | 1       |     | Amaricoccus tamworthensis                                |                               | Amaricoccus tamworthensis                                | 1421   | 0           | BL3                | genomic DNA |                                                                          | lithic environment                                   | 1         | 1421     | FALSE   | ncbi_filtered | 57002   |
| KU258255_1_1420            | 57002   | KU258255        | Amaricoccus tamworthensis strain BL4 16S ribosomal RNA gene, partial sequence                              | 12-Mar-16     | 4-Jan-18      | 1       |     | Amaricoccus tamworthensis                                |                               | Amaricoccus tamworthensis                                | 1420   | 0           | BL4                | genomic DNA |                                                                          | lithic environment                                   | 1         | 1420     | FALSE   | ncbi_filtered | 57002   |
| NR_026060_1_1424           | 57002   | NR_026060       | Amaricoccus tamworthensis strain Ben103 16S ribosomal RNA gene, partial sequence                           | 3-Feb-15      | 4-Jan-18      | 1       |     | Amaricoccus tamworthensis                                | RefSeq                        | Amaricoccus tamworthensis                                | 1424   | 0           | Ben103; ACM 5097   | rRNA        |                                                                          |                                                      | 1         | 1424     | TRUE    | ncbi_filtered | 57002   |
| AF537600_1_1469            | 57171   | AF537600        | Corynebacterium mucifaciens isolate 01-0118 16S ribosomal RNA gene, partial sequence                       | 31-Oct-02     | 4-Jan-18      | 1       |     | Corynebacterium mucifaciens                              |                               | Corynebacterium mucifaciens                              | 1469   | 1           |                    | genomic DNA | National Microbiology Laboratory Special Bacteriology Identifier 01-0118 | the blood culture of an immunocompromised patient    | 1         | 1469     | FALSE   | ncbi_filtered | 57171   |
| AF537601_1_1468            | 57171   | AF537601        | Corynebacterium mucifaciens isolate 97-0160 16S ribosomal RNA gene, partial sequence                       | 31-Oct-02     | 4-Jan-18      | 1       |     | Corynebacterium mucifaciens                              |                               | Corynebacterium mucifaciens                              | 1468   | 2           |                    | genomic DNA | National Microbiology Laboratory Special Bacteriology Identifier 97-0160 | blood culture                                        | 1         | 1468     | FALSE   | ncbi_filtered | 57171   |
| HQ337895_1_1208            | 57171   | HQ337895        | Corynebacterium mucifaciens strain 001199 16S ribosomal RNA gene, partial sequence                         | 15-Jul-11     | 4-Jan-18      | 1       |     | Corynebacterium mucifaciens                              |                               | Corynebacterium mucifaciens                              | 1208   | 0           | 1199               | genomic DNA |                                                                          |                                                      | 1         | 1208     | FALSE   | ncbi_filtered | 57171   |
| KU922264_1_1375            | 57171   | KU922264        | Corynebacterium mucifaciens strain L69 16S ribosomal RNA gene, partial sequence                            | 14-Jan-17     | 4-Jan-18      | 1       |     | Corynebacterium mucifaciens                              |                               | Corynebacterium mucifaciens                              | 1375   | 0           | L69                | genomic DNA |                                                                          | air                                                  | 1         | 1375     | FALSE   | ncbi_filtered | 57171   |
| KU922487_1_1376            | 57171   | KU922487        | Corynebacterium mucifaciens strain L44 16S ribosomal RNA gene, partial sequence                            | 14-Jan-17     | 4-Jan-18      | 1       |     | Corynebacterium mucifaciens                              |                               | Corynebacterium mucifaciens                              | 1376   | 0           | L44                | genomic DNA |                                                                          | air                                                  | 1         | 1376     | FALSE   | ncbi_filtered | 57171   |
| F1711178_1_1494            | 59505   | F1711178        | Actinotignum schaalii strain NML 98A095 16S ribosomal RNA gene, partial sequence                           | 14-Mar-09     | 4-Jan-18      | 1       |     | Actinotignum schaalii                                    |                               | Actinotignum schaalii                                    | 1494   | 0           | NML 98A095         | genomic DNA |                                                                          | blood culture                                        | 1         | 1494     | FALSE   | ncbi_filtered | 59505   |
| F1711188_1_1469            | 59505   | F1711188        | Actinotignum schaalii strain NML 070171 16S ribosomal RNA gene, partial sequence                           | 14-Mar-09     | 4-Jan-18      | 1       |     | Actinotignum schaalii                                    |                               | Actinotignum schaalii                                    | 1469   | 0           | NML 070171         | genomic DNA |                                                                          | blood culture                                        | 1         | 1469     | FALSE   | ncbi_filtered | 59505   |
| F1711193_1_1385            | 59505   | F1711193        | Actinotignum schaalii strain NML 080353-2 16S ribosomal RNA gene, partial sequence                         | 14-Mar-09     | 4-Jan-18      | 1       |     | Actinotignum schaalii                                    |                               | Actinotignum schaalii                                    | 1385   | 0           | NML 080353-2       | genomic DNA |                                                                          | blood culture                                        | 1         | 1385     | FALSE   | ncbi_filtered | 59505   |
| HQ992948_1_1500            | 59505   | HQ992948        | Actinotignum schaalii strain 34317 16S ribosomal RNA gene, partial sequence                                | 31-May-11     | 4-Jan-18      | 1       |     | Actinotignum schaalii                                    |                               | Actinotignum schaalii                                    | 1500   | 0           | 34317              | genomic DNA |                                                                          |                                                      | 1         | 1500     | FALSE   | ncbi_filtered | 59505   |
| NR_116869_1_1495           | 59505   | NR_116869       | Actinotignum schaalii strain CCG 27420 16S ribosomal RNA gene, partial sequence                            | 3-Feb-15      | 4-Jan-18      | 1       |     | Actinotignum schaalii                                    | RefSeq                        | Actinotignum schaalii                                    | 1495   | 0           | CCUG 27420         | rRNA        |                                                                          |                                                      | 1         | 1495     | TRUE    | ncbi_filtered | 59505   |
| AB649018_1_1445            | 59803   | AB649018        | Sphingomonas echinoides gene for 16S rRNA, partial sequence, strain: S32304                                | 29-Jul-11     | 4-Jan-18      | 1       |     | Sphingomonas echinoides                                  |                               | Sphingomonas echinoides                                  | 1445   | 0           | S32304             | genomic DNA |                                                                          | paddy soil in experimental farm                      | 1         | 1445     | FALSE   | ncbi_filtered | 59803   |
| AB649019_1_1445            | 59803   | AB649019        | Sphingomonas echinoides gene for 16S rRNA, partial sequence, strain: S32312                                | 29-Jul-11     | 4-Jan-18      | 1       |     | Sphingomonas echinoides                                  |                               | Sphingomonas echinoides                                  | 1445   | 0           | S32312             | genomic DNA |                                                                          | paddy soil in experimental farm                      | 1         | 1445     | FALSE   | ncbi_filtered | 59803   |
| KF923424_1_1451            | 59803   | KF923424        | Sphingomonas echinoides strain 14 16S ribosomal RNA gene, partial sequence                                 | 19-Mar-14     | 4-Jan-18      | 1       |     | Sphingomonas echinoides                                  |                               | Sphingomonas echinoides                                  | 1451   | 0           | 14                 | genomic DNA |                                                                          | permafrost soils                                     | 1         | 1451     | FALSE   | ncbi_filtered | 59803   |
| NR_024700_1_1463           | 59803   | NR_024700       | Sphingomonas echinoides strain ATCC 14820 16S ribosomal RNA gene, partial sequence                         | 3-Feb-15      | 4-Jan-18      | 1       |     | Sphingomonas echinoides (Pseudomonas echinoides)         | RefSeq                        | Sphingomonas echinoides                                  | 1463   | 5           | ATCC 14820         | rRNA        |                                                                          |                                                      | 1         | 1463     | TRUE    | ncbi_filtered | 59803   |
| NR_114697_1_1437           | 59803   | NR_114697       | Sphingomonas echinoides strain DSM 1805 16S ribosomal RNA gene, partial sequence                           | 3-Feb-15      | 4-Jan-18      | 1       |     | Sphingomonas echinoides                                  | RefSeq                        | Sphingomonas echinoides                                  | 1437   | 5           | DSM 1805           | rRNA        |                                                                          |                                                      | 1         | 1437     | TRUE    | ncbi_filtered | 59803   |
| HM807280_1_1479            | 59813   | HM807280        | Mycobacterium novocastrense strain HNTM1 16S ribosomal RNA gene, partial sequence                          | 7-Mar-11      | 4-Jan-18      | 1       |     | Mycobacterium novocastrense                              |                               | Mycobacterium novocastrense                              | 1479   | 0           | HNTM1              | genomic DNA |                                                                          |                                                      | 1         | 1479     | FALSE   | ncbi_filtered | 59813   |
| JX566889_1_1420            | 59813   | JX566889        | Mycobacterium novocastrense strain WK9 16S ribosomal RNA gene, partial sequence                            | 12-Nov-12     | 4-Jan-18      | 1       |     | Mycobacterium novocastrense                              |                               | Mycobacterium novocastrense                              | 1420   | 0           | WK9                | genomic DNA |                                                                          | surface water                                        | 1         | 1420     | FALSE   | ncbi_filtered | 59813   |
| NR_029208_1_1517           | 59813   | NR_029208       | Mycobacterium novocastrense strain 73 16S ribosomal RNA, partial sequence                                  | 24-Oct-17     | 4-Jan-18      | 1       |     | Mycobacterium novocastrense                              | RefSeq                        | Mycobacterium novocastrense                              | 1517   | 4           | 73; DSM 44203      | rRNA        |                                                                          |                                                      | 1         | 1517     | TRUE    | ncbi_filtered | 59813   |
| NZ_BCTA01000037_1_1439     | 59813   | NZ_BCTA01000037 | Mycobacterium novocastrense strain JCM18114, whole genome shotgun sequence                                 | 17-Apr-17     | 4-Jan-18      | 1       |     | Mycobacterium novocastrense                              | WGS;RefSeq;STANDARD_DRAFT     | Mycobacterium novocastrense                              | 1439   | 0           | JCM18114           | genomic DNA |                                                                          |                                                      | 1         | 1439     | TRUE    | ncbi_filtered | 59813   |
| F161866_1_1366             | 59814   | F161866         | Pantoea dispersa strain LMG 2605 16S ribosomal RNA gene, partial sequence                                  | 11-Feb-16     | 4-Jan-18      | 1       |     | Pantoea dispersa                                         |                               | Pantoea dispersa                                         | 1366   | 2           | LMG 2605           | genomic DNA |                                                                          |                                                      | 1         | 1366     | FALSE   | ncbi_filtered | 59814   |
| KC139443_1_1403            | 59814   | KC139443        | Pantoea dispersa strain B-4 16S ribosomal RNA gene, partial sequence                                       | 5-Feb-13      | 4-Jan-18      | 1       |     | Pantoea dispersa                                         |                               | Pantoea dispersa                                         | 1403   | 0           | B-4                | genomic DNA |                                                                          |                                                      | 1         | 1403     | FALSE   | ncbi_filtered | 59814   |
| KT310077_1_1471            | 59814   | KT310077        | Pantoea dispersa strain YB/JSRM - 01 16S ribosomal RNA gene, partial sequence                              | 7-Nov-15      | 4-Jan-18      | 1       |     | Pantoea dispersa                                         |                               | Pantoea dispersa                                         | 1471   | 1           | YB/JSRM - 01       | genomic DNA |                                                                          |                                                      | 1         | 1471     | FALSE   | ncbi          |         |

| seqname                     | tax_id  | accession       | description                                                                                   | modified_date | download_date | version | num_source | keywords                               | organism                           | length | ambig_count  | strain           | mol_type    | isolate                                                                  | isolation_source                                                                                                      | seq_start | seq_stop | is_type       | collection    | species |
|-----------------------------|---------|-----------------|-----------------------------------------------------------------------------------------------|---------------|---------------|---------|------------|----------------------------------------|------------------------------------|--------|--------------|------------------|-------------|--------------------------------------------------------------------------|-----------------------------------------------------------------------------------------------------------------------|-----------|----------|---------------|---------------|---------|
| MF101075_1_1346             | 60454   | MF101075        | Porphyrobacter tepidarius strain DIG-8 16S ribosomal RNA gene, partial sequence               | 19-Jun-17     | 4-Jan-18      | 1       |            | Porphyrobacter tepidarius              | Porphyrobacter tepidarius          | 1346   | 0            | DIG-8            | genomic DNA |                                                                          |                                                                                                                       | 1         | 1346     | FALSE         | ncbi_filtered | 60454   |
| NZ_MUVJ01000004_5113_6603   | 60454   | NZ_MUVJ01000004 | Porphyrobacter tepidarius strain DSM 10594 DSM10594_4_271593, whole genome shotgun sequence   | 24-May-17     | 4-Jan-18      | 1       |            | Porphyrobacter tepidarius              | WGS;RefSeq                         | 1491   | 0            | DSM 10594        | genomic DNA |                                                                          | brackish water                                                                                                        | 5113      | 6603     | TRUE          | ncbi_filtered | 60454   |
| AB898035_1_1414             | 60550   | AB898035        | Burkholderia pyrocinia gene for 16S ribosomal RNA, partial sequence, strain: Rai 3            | 5-Aug-14      | 4-Jan-18      | 1       |            | Burkholderia pyrocinia                 | Burkholderia pyrocinia             | 1414   | 0            | Rai 3            | genomic DNA |                                                                          | soil                                                                                                                  | 1         | 1414     | FALSE         | ncbi_filtered | 60550   |
| AI440713_1_1423             | 60550   | AI440713        | Burkholderia pyrocinia strain 16S rRNA gene, strain R11805                                    | 16-Jan-06     | 4-Jan-18      | 1       |            | Burkholderia pyrocinia                 | 16S ribosomal RNA;16S rRNA gene    | 1433   | 0            | R11805           | genomic DNA |                                                                          | soil                                                                                                                  | 1         | 1433     | FALSE         | ncbi_filtered | 60550   |
| NR_029210_1_1528            | 60550   | NR_029210       | Burkholderia pyrocinia strain 2327 16S ribosomal RNA gene, partial sequence                   | 3-Feb-15      | 4-Jan-18      | 1       |            | Burkholderia pyrocinia                 | RefSeq                             | 1528   | 0            | 2327_LMG_14191   | rRNA        |                                                                          |                                                                                                                       | 1         | 1528     | TRUE          | ncbi_filtered | 60550   |
| NR_112060_1_1506            | 60550   | NR_112060       | Burkholderia pyrocinia strain ATCC 15958 16S ribosomal RNA, partial sequence                  | 24-Oct-17     | 4-Jan-18      | 1       |            | Burkholderia pyrocinia                 | RefSeq                             | 1506   | 14           | ATCC 15958       | rRNA        |                                                                          |                                                                                                                       | 1         | 1506     | TRUE          | ncbi_filtered | 60550   |
| NZ_LQZU01000035_237_1772    | 60552   | NZ_LQZU01000035 | Burkholderia vietnamiensis strain MSMB1755 MSMB1755_130, whole genome shotgun sequence        | 11-Apr-17     | 4-Jan-18      | 1       |            | Burkholderia vietnamiensis             | WGS;RefSeq                         | 1536   | 0            | MSMB1755         | genomic DNA |                                                                          | Oya                                                                                                                   | 237       | 1772     | FALSE         | ncbi_filtered | 60550   |
| CP020394_1_1254             | 60552   | CP020394        | Burkholderia vietnamiensis strain FDAARGOS_239 chromosome 1, complete sequence                | 27-Mar-18     | 29-Mar-18     | 1       |            | Burkholderia vietnamiensis             | 1536                               | 0      | FDAARGOS_239 | genomic DNA      |             | soil                                                                     | 1207819                                                                                                               | 1209354   | FALSE    | ncbi_filtered | 60552         |         |
| FI436055_1_1524             | 60552   | FI436055        | Burkholderia vietnamiensis strain SYe-6586 16S ribosomal RNA gene, partial sequence           | 14-Jan-10     | 4-Jan-18      | 1       |            | Burkholderia vietnamiensis             | Burkholderia vietnamiensis         | 1524   | 0            | SYe-6586         | genomic DNA |                                                                          | sorghum rhizosphere                                                                                                   | 1         | 1524     | FALSE         | ncbi_filtered | 60552   |
| HQ220010_1_1399             | 60552   | HQ220010        | Burkholderia vietnamiensis strain AKB9 16S ribosomal RNA gene, partial sequence               | 26-Oct-11     | 4-Jan-18      | 1       |            | Burkholderia vietnamiensis             | Burkholderia vietnamiensis         | 1399   | 1            | AKB9             | genomic DNA |                                                                          | roots                                                                                                                 | 1         | 1399     | FALSE         | ncbi_filtered | 60552   |
| KX792233_1_1212             | 60552   | KX792233        | Burkholderia vietnamiensis strain AQS-12 16S ribosomal RNA gene, partial sequence             | 7-Sep-16      | 4-Jan-18      | 1       |            | Burkholderia vietnamiensis             | Burkholderia vietnamiensis         | 1212   | 0            | AQS-12           | genomic DNA |                                                                          | soil                                                                                                                  | 1         | 1212     | FALSE         | ncbi_filtered | 60552   |
| MG459269_1_1258             | 60552   | MG459269        | Burkholderia vietnamiensis strain BU97 16S ribosomal RNA gene, partial sequence               | 14-Nov-17     | 4-Jan-18      | 1       |            | Burkholderia vietnamiensis             | Burkholderia vietnamiensis         | 1258   | 0            | BU97             | genomic DNA |                                                                          |                                                                                                                       | 1         | 1258     | FALSE         | ncbi_filtered | 60552   |
| AF537593_1_1496             | 61592   | AF537593        | Corynebacterium durum isolate 99-0047 16S ribosomal RNA gene, partial sequence                | 31-Oct-02     | 4-Jan-18      | 1       |            | Corynebacterium durum                  | Corynebacterium durum              | 1496   | 1            |                  | genomic DNA | National Microbiology Laboratory Special Bacteriology Identifier 99-0047 | blood culture                                                                                                         | 1         | 1496     | FALSE         | ncbi_filtered | 61592   |
| GU561325_1_1418             | 61592   | GU561325        | Corynebacterium durum strain TTE12 16S ribosomal RNA gene, partial sequence                   | 13-Mar-10     | 4-Jan-18      | 1       |            | Corynebacterium durum                  | Corynebacterium durum              | 1418   | 0            | TTE12            | genomic DNA |                                                                          | oral cavity                                                                                                           | 1         | 1418     | FALSE         | ncbi_filtered | 61592   |
| NR_026539_1_1423            | 61592   | NR_026539       | Corynebacterium durum strain IBS G15036 16S ribosomal RNA gene, partial sequence              | 3-Feb-15      | 4-Jan-18      | 1       |            | Corynebacterium durum                  | RefSeq;16S rRNA                    | 1423   | 0            | IBS G15036       | rRNA        |                                                                          |                                                                                                                       | 1         | 1423     | TRUE          | ncbi_filtered | 61592   |
| FI823004_1_1416             | 61645   | FI823004        | Enterobacter asburiae strain g-62 16S ribosomal RNA gene, partial sequence                    | 25-Mar-09     | 4-Jan-18      | 1       |            | Enterobacter asburiae                  | Enterobacter asburiae              | 1416   | 0            | g-62             | genomic DNA |                                                                          |                                                                                                                       | 1         | 1416     | FALSE         | ncbi_filtered | 61645   |
| KT269693_1_1215             | 61645   | KT269693        | Enterobacter asburiae strain RCB751 16S ribosomal RNA gene, partial sequence                  | 19-Sep-15     | 4-Jan-18      | 1       |            | Enterobacter asburiae                  | Enterobacter asburiae              | 1215   | 0            | RCB751           | genomic DNA |                                                                          | bat guano                                                                                                             | 1         | 1215     | FALSE         | ncbi_filtered | 61645   |
| KU942481_1_1321             | 61645   | KU942481        | Enterobacter asburiae strain PWW1 16S ribosomal RNA gene, partial sequence                    | 29-Mar-16     | 4-Jan-18      | 1       |            | Enterobacter asburiae                  | Enterobacter asburiae              | 1321   | 0            | PWW1             | genomic DNA |                                                                          | stomach                                                                                                               | 1         | 1321     | FALSE         | ncbi_filtered | 61645   |
| NZ_CP007546_3038101_3039654 | 61645   | NZ_CP007546     | Enterobacter asburiae L1, complete genome                                                     | 2-Apr-17      | 4-Jan-18      | 1       |            | Enterobacter asburiae L1               | RefSeq                             | 1554   | 0            | L1               | genomic DNA |                                                                          | lettuce                                                                                                               | 3038101   | 3039654  | FALSE         | ncbi_filtered | 61645   |
| NZ_CP011591_2690385_2691940 | 61645   | NZ_CP011591     | Enterobacter asburiae strain CAV1043, complete genome                                         | 3-Apr-17      | 4-Jan-18      | 1       |            | Enterobacter asburiae                  | RefSeq                             | 1556   | 0            | CAV1043          | genomic DNA |                                                                          |                                                                                                                       | 2690385   | 2691940  | FALSE         | ncbi_filtered | 61645   |
| JN650546_1_1382             | 61646   | JN650546        | Enterobacter amnigenus strain DC86 16S ribosomal RNA gene, partial sequence                   | 19-Oct-11     | 4-Jan-18      | 1       |            | Lelliottia amnigena                    | Lelliottia amnigena                | 1382   | 0            | DC86             | genomic DNA |                                                                          | dolomite rock                                                                                                         | 1         | 1382     | FALSE         | ncbi_filtered | 61646   |
| K0054964_1_1462             | 61646   | K0054964        | Lelliottia amnigena strain KAR2 16S ribosomal RNA gene, complete sequence                     | 20-Jul-15     | 4-Jan-18      | 1       |            | Lelliottia amnigena                    | Lelliottia amnigena                | 1462   | 0            | KAR2             | genomic DNA |                                                                          | macerated tuber                                                                                                       | 1         | 1462     | FALSE         | ncbi_filtered | 61646   |
| NZ_CP015774_275188_276741   | 61646   | NZ_CP015774     | Lelliottia amnigena strain ZB04, complete genome                                              | 14-Jun-17     | 4-Jan-18      | 2       |            | Lelliottia amnigena                    | RefSeq                             | 1554   | 0            | ZB04             | genomic DNA |                                                                          | Midgut of silkworm                                                                                                    | 275188    | 276741   | FALSE         | ncbi_filtered | 61646   |
| NZ_CP023529_3317097_3318652 | 61646   | NZ_CP023529     | Lelliottia amnigena strain FDAARGOS_395, complete genome                                      | 1-Oct-17      | 4-Jan-18      | 1       |            | Lelliottia amnigena                    | RefSeq                             | 1556   | 0            | FDAARGOS_395     | genomic DNA |                                                                          | Soil                                                                                                                  | 3317097   | 3318652  | FALSE         | ncbi_filtered | 61646   |
| NZ_KX737778_388610_390165   | 1439331 | NZ_KX737778     | Lelliottia amnigena CHS 78 aedZ-supercoint1.2, whole genome shotgun sequence                  | 10-Apr-17     | 4-Jan-18      | 1       |            | Lelliottia amnigena CHS 78             | WGS;RefSeq                         | 1556   | 0            | CHS 78           | genomic DNA |                                                                          | Fluid                                                                                                                 | 388610    | 390165   | FALSE         | ncbi_filtered | 61646   |
| AF537607_1_1461             | 62629   | AF537607        | Corynebacterium thomssenii isolate 97-0130 16S ribosomal RNA gene, partial sequence           | 31-Oct-02     | 4-Jan-18      | 1       |            | Corynebacterium thomssenii             | Corynebacterium thomssenii         | 1461   | 0            |                  | genomic DNA | National Microbiology Laboratory Special Bacteriology Identifier 97-0130 | air sample culture                                                                                                    | 1         | 1461     | FALSE         | ncbi_filtered | 62629   |
| NR_024849_1_1472            | 62629   | NR_024849       | Corynebacterium thomssenii strain DSM 44276 16S ribosomal RNA gene, partial sequence          | 3-Feb-15      | 4-Jan-18      | 1       |            | Corynebacterium thomssenii             | RefSeq                             | 1472   | 0            | DSM 44276        | rRNA        |                                                                          |                                                                                                                       | 1         | 1472     | TRUE          | ncbi_filtered | 62629   |
| NR_114971_1_1510            | 66228   | NR_114971       | Actinomyces europaeus strain CCGJ 32789A 16S ribosomal RNA gene, partial sequence             | 3-Feb-15      | 4-Jan-18      | 1       |            | Actinomyces europaeus                  | RefSeq                             | 1510   | 0            | CCGJ 32789A      | rRNA        |                                                                          |                                                                                                                       | 1         | 1510     | TRUE          | ncbi_filtered | 66228   |
| NZ_KI150266_1572321_1573868 | 883069  | NZ_KI150266     | Actinomyces europaeus ACS-120-V-Col10b acsNW-supercont1.1, whole genome shotgun sequence      | 17-Apr-17     | 4-Jan-18      | 1       |            | Actinomyces europaeus ACS-120-V-Col10b | WGS;HIGH_QUALITY_DRAFT;RefSeq      | 1548   | 0            | ACS-120-V-Col10b | genomic DNA |                                                                          |                                                                                                                       | 1573221   | 1573868  | FALSE         | ncbi_filtered | 66228   |
| PHN0100005_128_1672         | 66228   | PHN0100005      | Actinomyces europaeus strain ERM1203664.1957_1_76.5, whole genome shotgun sequence            | 10-Jan-18     | 12-Jan-18     | 1       |            | Actinomyces europaeus                  | WGS                                | 1545   | 0            | UMB0652          | genomic DNA |                                                                          | catheter                                                                                                              | 128       | 1672     | FALSE         | ncbi_filtered | 66228   |
| FI61855_1_1366              | 66271   | FI61855         | Pantoea stewartii subsp. stewartii strain ATCC 29923 16S ribosomal RNA gene, partial sequence | 11-Feb-16     | 4-Jan-18      | 1       |            | Pantoea stewartii subsp. stewartii     | Pantoea stewartii subsp. stewartii | 1366   | 0            | ATCC 29923       | genomic DNA |                                                                          |                                                                                                                       | 1         | 1366     | FALSE         | ncbi_filtered | 66269   |
| GU942726_1_1473             | 66271   | GU942726        | Pantoea stewartii subsp. stewartii strain KNU28280 16S ribosomal RNA gene, partial sequence   | 16-May-10     | 4-Jan-18      | 1       |            | Pantoea stewartii subsp. stewartii     | Pantoea stewartii subsp. stewartii | 1473   | 2            | KNU28280         | genomic DNA |                                                                          |                                                                                                                       | 1         | 1473     | FALSE         | ncbi_filtered | 66269   |
| KJ803125_1_1273             | 66269   | KJ803125        | Pantoea stewartii strain MO09 16S ribosomal RNA gene, partial sequence                        | 9-Sep-14      | 4-Jan-18      | 1       |            | Pantoea stewartii                      | Pantoea stewartii                  | 1273   | 0            | MO09             | genomic DNA |                                                                          | waterfall                                                                                                             | 1         | 1273     | FALSE         | ncbi_filtered | 66269   |
| KJ146472_1_1451             | 66269   | KJ146472        | Pantoea stewartii strain 08BF117N 16S ribosomal RNA gene, partial sequence                    | 5-Jun-16      | 4-Jan-18      | 1       |            | Pantoea stewartii                      | Pantoea stewartii                  | 1451   | 0            | 08BF117N         | genomic DNA |                                                                          | agricultural soil                                                                                                     | 1         | 1451     | FALSE         | ncbi_filtered | 66269   |
| NR_104928_1_1524            | 66270   | NR_104928       | Pantoea stewartii subsp. indologenes strain CIP 104006 16S ribosomal RNA, partial sequence    | 24-Oct-17     | 4-Jan-18      | 1       |            | Pantoea stewartii subsp. indologenes   | RefSeq                             | 1524   | 0            | CIP 104006       | rRNA        |                                                                          | leafpot                                                                                                               | 1         | 1524     | TRUE          | ncbi_filtered | 66269   |
| EU570677_1_1442             | 66897   | EU570677        | Streptomyces griseorubens strain 173457 16S ribosomal RNA gene, partial sequence              | 20-Apr-08     | 4-Jan-18      | 1       |            | Streptomyces griseorubens              | Streptomyces griseorubens          | 1442   | 2            | 173457           | genomic DNA |                                                                          |                                                                                                                       | 1         | 1442     | FALSE         | ncbi_filtered | 66897   |
| EU593611_1_1438             | 66897   | EU593611        | Streptomyces griseorubens strain 17928 16S ribosomal RNA gene, partial sequence               | 21-Apr-08     | 4-Jan-18      | 1       |            | Streptomyces griseorubens              | Streptomyces griseorubens          | 1438   | 1            | 17928            | genomic DNA |                                                                          |                                                                                                                       | 1         | 1438     | FALSE         | ncbi_filtered | 66897   |
| KJ571075_1_1426             | 66897   | KJ571075        | Streptomyces griseorubens strain 12-6 16S ribosomal RNA gene, partial sequence                | 24-May-14     | 4-Jan-18      | 1       |            | Streptomyces griseorubens              | Streptomyces griseorubens          | 1421   | 0            | 6-Dec            | genomic DNA |                                                                          |                                                                                                                       | 1         | 1421     | FALSE         | ncbi_filtered | 66897   |
| KY120282_1_1466             | 66897   | KY120282        | Streptomyces griseorubens strain P574 16S ribosomal RNA gene, partial sequence                | 11-Nov-16     | 4-Jan-18      | 1       |            | Streptomyces griseorubens              | Streptomyces griseorubens          | 1466   | 0            | P574             | genomic DNA |                                                                          | Water Sample-Polar Frontal Region of the Antarctica                                                                   | 1         | 1466     | FALSE         | ncbi_filtered | 66897   |
| KY783422_1_1436             | 66897   | KY783422        | Streptomyces griseorubens strain MA-21 16S ribosomal RNA gene, partial sequence               | 4-Nov-17      | 4-Jan-18      | 1       |            | Streptomyces griseorubens              | Streptomyces griseorubens          | 1436   | 0            | MA-21            | genomic DNA |                                                                          |                                                                                                                       | 1         | 1436     | FALSE         | ncbi_filtered | 66897   |
| NR_041116_1_1474            | 67380   | NR_041116       | Streptomyces violaceus strain NBRC 13104 16S ribosomal RNA gene, partial sequence             | 3-Feb-15      | 4-Jan-18      | 1       |            | Streptomyces violaceus                 | RefSeq                             | 1474   | 0            | NBRC 13104       | rRNA        |                                                                          |                                                                                                                       | 1         | 1474     | TRUE          | ncbi_filtered | 67380   |
| AB741664_1_1324             | 67827   | AB741664        | Citrobacter werkmanii gene for 16S ribosomal RNA, partial sequence, strain: GTC 01321         | 1-Nov-13      | 4-Jan-18      | 1       |            | Citrobacter werkmanii                  | Citrobacter werkmanii              | 1324   | 0            | GTC 01321        | genomic DNA |                                                                          |                                                                                                                       | 1         | 1324     | FALSE         | ncbi_filtered | 67827   |
| FI581027_1_1530             | 67827   | FI581027        | Citrobacter werkmanii strain IITRL7 16S ribosomal RNA gene, partial sequence                  | 21-Jan-09     | 4-Jan-18      | 1       |            | Citrobacter werkmanii                  | Citrobacter werkmanii              | 1530   | 0            | IITRL7           | genomic DNA |                                                                          | pulp paper mill waste contaminated site containing phenolics, lignin, chlorophenol, mercaptane sulfide and few metals | 1         | 1530     | FALSE         | ncbi_filtered | 67827   |
| KP337928_1_1234             | 67827   | KP337928        | Citrobacter werkmanii strain SI-GU-38 16S ribosomal RNA gene, partial sequence                | 10-Jun-15     | 4-Jan-18      | 1       |            | Citrobacter werkmanii                  | Citrobacter werkmanii              | 1234   | 0            | SI-GU-38         | genomic DNA |                                                                          | larval gut                                                                                                            | 1         | 1234     | FALSE         | ncbi_filtered | 67827   |
| K8611996_1_1521             | 67827   | K8611996        | Citrobacter werkmanii strain RPR-CCF16 16S ribosomal RNA gene, partial sequence               | 17-Jun-15     | 4-Jan-18      | 1       |            | Citrobacter werkmanii                  | Citrobacter werkmanii              | 1521   | 4            | RPR-CCF16        | genomic DNA |                                                                          | Rampand reservoir water sample                                                                                        | 1         | 1521     | FALSE         | ncbi_filtered | 67827   |
| NZ_CP019986_3604727_3606282 | 67827   | NZ_CP019986     | Citrobacter werkmanii strain BF-6, complete genome                                            | 15-Mar-17     | 4-Jan-18      | 1       |            | Citrobacter werkmanii                  | RefSeq                             | 1556   | 0            | BF-6             | genomic DNA |                                                                          | Industrial starch water                                                                                               | 3604727   | 3606282  | FALSE         | ncbi_filtered | 67827   |
| EU741215_1_1492             | 68219   | EU741215        | Streptomyces iakyrus strain 13667L 16S ribosomal RNA gene, partial sequence                   | 30-Apr-09     | 4-Jan-18      | 1       |            | Streptomyces iakyrus                   | Streptomyces iakyrus               | 1492   | 1            | 13667L           | genomic DNA |                                                                          | beach sand                                                                                                            | 1         | 1492     | FALSE         | ncbi_filtered | 68219   |
| KC172010_1_1422             | 68219   | KC172010        | Streptomyces iakyrus strain JF35 16S ribosomal RNA gene, partial sequence                     | 5-Dec-12      | 4-Jan-18      | 1       |            | Streptomyces iakyrus                   | Streptomyces iakyrus               | 1422   | 0            | JF35             | genomic DNA |                                                                          | soil at elevation 34-60 meters, between 115 deg 52 min-117 deg 36 min N, 24 deg 26 min-35 deg-57 min E                | 1         | 1422     | FALSE         | ncbi_filtered | 68219   |
| KY007185_1_1388             | 68219   | KY007185        | Streptomyces iakyrus strain nenu_DS_30 16S ribosomal RNA gene, partial sequence               | 23-Oct-16     | 4-Jan-18      | 1       |            | Streptomyces iakyrus                   | Streptomyces iakyrus               | 1388   | 0            | nenu_DS_30       | genomic DNA |                                                                          | grassland soil                                                                                                        | 1         | 1388     | FALSE         | ncbi_filtered | 68219   |
| MG597593_1_1394             | 68219   | MG597593        | Streptomyces iakyrus strain TG10 16S ribosomal RNA gene, partial sequence                     | 10-Dec-17     | 4-Jan-18      | 1       |            | Streptomyces iakyrus                   | Streptomyces iakyrus               | 1394   | 0            | TG10             | genomic DNA |                                                                          |                                                                                                                       | 1         | 1394     | FALSE         | ncbi_filtered | 68219   |
| NR_114836_1_1448            | 68219   | NR_114836       | Streptomyces iakyrus strain SP 5482 16S ribosomal RNA gene, partial sequence                  | 3-Feb-15</    |               |         |            |                                        |                                    |        |              |                  |             |                                                                          |                                                                                                                       |           |          |               |               |         |

| seqname                     | tax_id  | accession       | description                                                                                           | modified_date | download_date | version_num | source                                              | keywords                               | organism                                            | length | ambig_count         | strain             | mol_type    | isolate                                                          | isolation_source                                            | seq_start | seq_stop | is_type | collection    | species       |       |
|-----------------------------|---------|-----------------|-------------------------------------------------------------------------------------------------------|---------------|---------------|-------------|-----------------------------------------------------|----------------------------------------|-----------------------------------------------------|--------|---------------------|--------------------|-------------|------------------------------------------------------------------|-------------------------------------------------------------|-----------|----------|---------|---------------|---------------|-------|
| NZ_AFN00100024_3286_4841    | 1005705 | NZ_AFN00100024  | Streptococcus infantis SK1076 ctg112915745490L whole genome shotgun sequence                          | 15-Nov-17     | 4-Jan-18      | 1           | Streptococcus infantis SK1076                       | WGS,RefSeq                             | Streptococcus infantis SK1076                       | 1556   | 0                   | SK1076             | genomic DNA |                                                                  | biological product [ENVO:021000043]                         | 3286      | 4841     | FALSE   | ncbi_filtered | 68892         |       |
| NZ_ALCH01000001_342_1892    | 1159208 | NZ_ALCH01000001 | Streptococcus infantis SPAR10 GA06201.contig.0, whole genome shotgun sequence                         | 24-Nov-17     | 4-Jan-18      | 1           | Streptococcus infantis SPAR10                       | WGS,RefSeq                             | Streptococcus infantis SPAR10                       | 1551   | 0                   | SPAR10             | genomic DNA |                                                                  | blood                                                       | 342       | 1892     | FALSE   | ncbi_filtered | 68892         |       |
| NZ_GL732443_66_1617         | 689204  | NZ_GL732443     | Streptococcus infantis ATCC 700779 SCAFFOLDS, whole genome shotgun sequence                           | 30-Mar-17     | 4-Jan-18      | 1           | Streptococcus infantis ATCC 700779                  | WGS,STANDARD_DRAFT,RefSeq              | Streptococcus infantis ATCC 700779                  | 1552   | 0                   | ATCC 700779        | genomic DNA |                                                                  |                                                             | 66        | 1617     | TRUE    | ncbi_filtered | 68892         |       |
| NR_024616_1_1472            | 68910   | NR_024616       | Deinococcus murrayi strain ALT-1B7 16S ribosomal RNA gene, partial sequence                           | 3-Feb-15      | 4-Jan-18      | 1           | Deinococcus murrayi                                 | RefSeq                                 | Deinococcus murrayi                                 | 1472   | 0                   | ALT-1B7; DSM 11303 | rRNA        |                                                                  |                                                             | 1         | 1472     | TRUE    | ncbi_filtered | 68910         |       |
| NZ_AWX10100018_78162_79669  | 1121383 | NZ_AWX10100018  | H565DRAFF_scaffold00010_10_C, whole genome shotgun sequence                                           | 17-Apr-17     | 4-Jan-18      | 1           | Deinococcus murrayi DSM 11303                       | WGS,RefSeq                             | Deinococcus murrayi DSM 11303                       | 1508   | 0                   | DSM 11303          | genomic DNA |                                                                  |                                                             | 78162     | 79669    | TRUE    | ncbi_filtered | 68910         |       |
| Y13042_1_1472               | 68910   | Y13042          | D.murrayi 16S rRNA gene, isolate RSG-1.2                                                              | 1-Nov-97      | 4-Jan-18      | 1           | Deinococcus murrayi                                 | 16S ribosomal RNA;16S rRNA gene        | Deinococcus murrayi                                 | 1472   | 0                   |                    | genomic DNA | RSG-1.2                                                          |                                                             | 1         | 1472     | FALSE   | ncbi_filtered | 68910         |       |
| Y13043_1_1473               | 68910   | Y13043          | D.murrayi 16S rRNA gene, isolate RSP5-7a                                                              | 1-Nov-97      | 4-Jan-18      | 1           | Deinococcus murrayi                                 | 16S ribosomal RNA;16S rRNA gene        | Deinococcus murrayi                                 | 1473   | 0                   |                    | genomic DNA | RSP5-7a                                                          |                                                             | 1         | 1473     | FALSE   | ncbi_filtered | 68910         |       |
| NZ_CP024021_4338889_4360373 | 69666   | NZ_CP024021     | Caulobacter mirabilis strain FWC 38, complete genome                                                  | 6-Nov-17      | 4-Jan-18      | 1           | Caulobacter mirabilis                               | RefSeq                                 | Caulobacter mirabilis                               | 1485   | 0                   | FWC 38             | genomic DNA |                                                                  | activated sludge from a Las Vegas sewage treatment facility | 4358889   | 4360373  | TRUE    | ncbi_filtered | 69666         |       |
| KP191046_1_1466             | 69966   | KP191046        | Macrocooccus caseolyticus strain H2 16S ribosomal RNA gene, partial sequence                          | 5-Apr-15      | 4-Jan-18      | 1           | Macrocooccus caseolyticus                           | Macrocooccus caseolyticus              | 1466                                                | 0      | H2                  | genomic DNA        |             | spleen                                                           |                                                             | 1         | 1466     | FALSE   | ncbi_filtered | 69966         |       |
| K0602008_1_1419             | 69966   | K0602008        | Macrocooccus caseolyticus strain CF19 16S ribosomal RNA gene, partial sequence                        | 17-May-16     | 4-Jan-18      | 1           | Macrocooccus caseolyticus                           | Macrocooccus caseolyticus              | 1419                                                | 0      | CF19                | genomic DNA        |             | air                                                              |                                                             | 1         | 1419     | FALSE   | ncbi_filtered | 69966         |       |
| MG722794_1_1425             | 69966   | MG722794        | Macrocooccus caseolyticus strain GCF52 16S ribosomal RNA gene, partial sequence                       | 31-Dec-17     | 4-Jan-18      | 1           | Macrocooccus caseolyticus                           | Macrocooccus caseolyticus              | 1425                                                | 0      | GCF52               | genomic DNA        |             | marine environment                                               |                                                             | 1         | 1425     | FALSE   | ncbi_filtered | 69966         |       |
| MG786578_1_1441             | 69966   | MG786578        | Macrocooccus caseolyticus strain CIMCSCG 16S ribosomal RNA gene, partial sequence                     | 20-Jan-18     | 22-Jan-18     | 1           | Macrocooccus caseolyticus                           | Macrocooccus caseolyticus              | 1441                                                | 0      | CIMCSCG             | genomic DNA        |             | Hypophthalmichthys molitrix                                      |                                                             | 1         | 1441     | FALSE   | ncbi_filtered | 69966         |       |
| MH044686_1_1361             | 69966   | MH044686        | Macrocooccus caseolyticus strain CCM 7927 16S ribosomal RNA gene, partial sequence                    | 17-Mar-18     | 22-Mar-18     | 1           | Macrocooccus caseolyticus                           | Macrocooccus caseolyticus              | 1561                                                | 0      | CCM 7927            | genomic DNA        |             | human, acute vaginitis                                           |                                                             | 1         | 1561     | FALSE   | ncbi_filtered | 69966         |       |
| M429514_1_1565              | 70255   | M429514         | Staphylococcus condimentii strain CAU8116 16S ribosomal RNA gene, partial sequence                    | 10-Aug-17     | 4-Jan-18      | 1           | Staphylococcus condimentii                          | Staphylococcus condimentii             | 1395                                                | 0      | CAU8116             | genomic DNA        |             | goat milk                                                        |                                                             | 1         | 1395     | FALSE   | ncbi_filtered | 70255         |       |
| NZ_CP015114_1411002_1412558 | 70255   | NZ_CP015114     | Staphylococcus condimentii strain DSM 11674, complete genome                                          | 12-Apr-17     | 4-Jan-18      | 1           | Staphylococcus condimentii                          | RefSeq                                 | Staphylococcus condimentii                          | 1557   | 0                   | DSM 11674          | genomic DNA |                                                                  | soy sauce mash                                              | 1411002   | 1412558  | TRUE    | ncbi_filtered | 70255         |       |
| NZ_CP015114_2567367_2568923 | 70255   | NZ_CP015114     | Staphylococcus condimentii strain DSM 11674, complete genome                                          | 12-Apr-17     | 4-Jan-18      | 1           | Staphylococcus condimentii                          | RefSeq                                 | Staphylococcus condimentii                          | 1557   | 0                   | DSM 11674          | genomic DNA |                                                                  | soy sauce mash                                              | 2567367   | 2568923  | TRUE    | ncbi_filtered | 70255         |       |
| NZ_CP015114_34049_35605     | 70255   | NZ_CP015114     | Staphylococcus condimentii strain DSM 11674, complete genome                                          | 12-Apr-17     | 4-Jan-18      | 1           | Staphylococcus condimentii                          | RefSeq                                 | Staphylococcus condimentii                          | 1557   | 0                   | DSM 11674          | genomic DNA |                                                                  | soy sauce mash                                              | 34049     | 35605    | TRUE    | ncbi_filtered | 70255         |       |
| NR_024875_1_1416            | 70586   | NR_024875       | Aquabacterium commune strain B8 16S ribosomal RNA gene, partial sequence                              | 3-Feb-15      | 4-Jan-18      | 1           | Aquabacterium commune                               | RefSeq                                 | Aquabacterium commune                               | 1416   | 0                   | B8; DSM 11901      | rRNA        |                                                                  |                                                             | 1         | 1416     | TRUE    | ncbi_filtered | 70586         |       |
| DQ095909_1_1434             | 70775   | DQ095909        | Pseudomonas plecoglossicida strain S20 16S ribosomal RNA gene, partial sequence                       | 17-Apr-13     | 4-Jan-18      | 1           | Pseudomonas plecoglossicida                         | Pseudomonas plecoglossicida            | 1434                                                | 0      | S20                 | genomic DNA        |             |                                                                  |                                                             | 1         | 1434     | FALSE   | ncbi_filtered | 70775         |       |
| FI52916_1_1390              | 70775   | FI52916         | Pseudomonas plecoglossicida strain PNP-F5 16S ribosomal RNA gene, partial sequence                    | 17-Jan-09     | 4-Jan-18      | 1           | Pseudomonas plecoglossicida                         | Pseudomonas plecoglossicida            | 1390                                                | 0      | PNP-F5              | genomic DNA        |             | soil                                                             |                                                             | 1         | 1390     | FALSE   | ncbi_filtered | 70775         |       |
| K054835_1_1462              | 70775   | K054835         | Pseudomonas plecoglossicida strain IARI-DV-5 16S ribosomal RNA gene, partial sequence                 | 29-Jun-13     | 4-Jan-18      | 1           | Pseudomonas plecoglossicida                         | Pseudomonas plecoglossicida            | 1462                                                | 0      | IARI-DV-5           | genomic DNA        |             | what phylosphere                                                 |                                                             | 1         | 1462     | FALSE   | ncbi_filtered | 70775         |       |
| K074593_1_1348              | 70775   | K074593         | Pseudomonas plecoglossicida strain TR1B_36 16S ribosomal RNA gene, partial sequence                   | 31-Aug-16     | 4-Jan-18      | 1           | Pseudomonas plecoglossicida                         | Pseudomonas plecoglossicida            | 1348                                                | 0      | TR1B_36             | genomic DNA        |             | tomato root                                                      |                                                             | 1         | 1348     | FALSE   | ncbi_filtered | 70775         |       |
| NZ_B8V1000080_246_1792      | 1215115 | NZ_B8V1000080   | Pseudomonas plecoglossicida NBRC 103162 = DSM 15088 strain NBRC 103162, whole genome shotgun sequence | 9-Apr-17      | 4-Jan-18      | 1           | Pseudomonas plecoglossicida NBRC 103162 = DSM 15088 | WGS,HIGH_QUALITY_DRAFT,RefSeq          | Pseudomonas plecoglossicida NBRC 103162 = DSM 15088 | 1547   | 0                   | NBRC 103162        | genomic DNA |                                                                  |                                                             |           | 246      | 1792    | TRUE          | ncbi_filtered | 70775 |
| EU333883_1_1426             | 71999   | EU333883        | Kocuria palustris strain K01-18 16S ribosomal RNA gene, complete sequence                             | 13-Jan-08     | 4-Jan-18      | 1           | Kocuria palustris                                   | Kocuria palustris                      | 1426                                                | 0      | K01-18              | genomic DNA        |             | soil from cold desert                                            |                                                             | 1         | 1426     | FALSE   | ncbi_filtered | 71999         |       |
| J077104_1_1430              | 71999   | J077104         | Kocuria palustris strain +Y113 16S ribosomal RNA gene, partial sequence                               | 17-Jul-12     | 4-Jan-18      | 1           | Kocuria palustris                                   | Kocuria palustris                      | 1430                                                | 0      | 0                   | genomic DNA        |             | fresh leaf                                                       |                                                             | 1         | 1430     | FALSE   | ncbi_filtered | 71999         |       |
| KF424687_1_1468             | 71999   | KF424687        | Kocuria palustris strain KH182 16S ribosomal RNA gene, partial sequence                               | 31-Dec-14     | 4-Jan-18      | 1           | Kocuria palustris                                   | Kocuria palustris                      | 1468                                                | 0      | XH182               | genomic DNA        |             | deep-sea sediments                                               |                                                             | 1         | 1468     | FALSE   | ncbi_filtered | 71999         |       |
| KF704371_1_1434             | 71999   | KF704371        | Kocuria palustris strain Abk-6 16S ribosomal RNA gene, partial sequence                               | 2-Oct-13      | 4-Jan-18      | 1           | Kocuria palustris                                   | Kocuria palustris                      | 1434                                                | 0      | Abk-6               | genomic DNA        |             | Hypenthalia cunea                                                |                                                             | 1         | 1434     | FALSE   | ncbi_filtered | 71999         |       |
| KP208639_1_1495             | 71999   | KP208639        | Kocuria palustris strain IHB B 17003 16S ribosomal RNA gene, partial sequence                         | 25-Sep-15     | 4-Jan-18      | 1           | Kocuria palustris                                   | Kocuria palustris                      | 1495                                                | 0      | IHB B 17003         | genomic DNA        |             | safranin rhizospheric soil                                       |                                                             | 1         | 1495     | FALSE   | ncbi_filtered | 71999         |       |
| AM292062_1_1445             | 72000   | AM292062        | Kocuria rhizophila partial 16S rRNA gene, isolate zf-S1-1                                             | 1-Dec-07      | 4-Jan-18      | 1           | Kocuria rhizophila                                  | 16S ribosomal RNA;16S rRNA gene        | Kocuria rhizophila                                  | 1445   | 1                   |                    | genomic DNA | zf-S1-1                                                          | ice ore                                                     |           | 1        | 1445    | FALSE         | ncbi_filtered | 72000 |
| EU554435_1_1448             | 72000   | EU554435        | Kocuria rhizophila strain Ag09 16S ribosomal RNA gene, partial sequence                               | 23-Apr-08     | 4-Jan-18      | 1           | Kocuria rhizophila                                  | Kocuria rhizophila                     | 1448                                                | 0      | Ag09                | genomic DNA        |             | larval gut                                                       |                                                             | 1         | 1448     | FALSE   | ncbi_filtered | 72000         |       |
| KM874398_1_1406             | 72000   | KM874398        | Kocuria rhizophila strain NM2E10 16S ribosomal RNA gene, partial sequence                             | 1-Aug-17      | 4-Jan-18      | 1           | Kocuria rhizophila                                  | Kocuria rhizophila                     | 1406                                                | 0      | NM2E10              | genomic DNA        |             | root                                                             |                                                             | 1         | 1406     | FALSE   | ncbi_filtered | 72000         |       |
| MF962607_1_1406             | 72000   | MF962607        | Kocuria rhizophila strain 39S6G 16S ribosomal RNA gene, partial sequence                              | 21-Sep-17     | 4-Jan-18      | 1           | Kocuria rhizophila                                  | Kocuria rhizophila                     | 1406                                                | 0      | 39S6G               | genomic DNA        |             | water phase of cross-linked potassium polycrylate superabsorbent |                                                             | 1         | 1406     | FALSE   | ncbi_filtered | 72000         |       |
| MG230492_1_1404             | 72000   | MG230492        | Kocuria rhizophila strain p5-2 16S ribosomal RNA gene, partial sequence                               | 25-Oct-17     | 4-Jan-18      | 1           | Kocuria rhizophila                                  | Kocuria rhizophila                     | 1404                                                | 0      | p5-2                | genomic DNA        |             | live poultry                                                     |                                                             | 1         | 1404     | FALSE   | ncbi_filtered | 72000         |       |
| AB542089_1_1398             | 72026   | AB542089        | Helicoccus ovis gene for 16S ribosomal RNA, partial sequence, strain: H21-Yamagata-00808              | 20-Jan-10     | 4-Jan-18      | 1           | Helicoccus ovis                                     | Helicoccus ovis                        | 1398                                                | 0      | H21-Yamagata-00808  | genomic DNA        |             | cattle                                                           |                                                             | 1         | 1398     | FALSE   | ncbi_filtered | 72026         |       |
| LC367054_1_1423             | 72026   | LC367054        | Helicoccus ovis T13_Yamagata_080813 gene for 16S ribosomal RNA, partial sequence                      | 3-Feb-18      | 14-Feb-18     | 1           | Helicoccus ovis                                     | Helicoccus ovis                        | 1423                                                | 1      | T13_Yamagata_080813 | genomic DNA        |             | Heart                                                            |                                                             | 1         | 1423     | FALSE   | ncbi_filtered | 72026         |       |
| LC367057_1_1423             | 72026   | LC367057        | Helicoccus ovis S88_Yamagata_110929 gene for 16S ribosomal RNA, partial sequence                      | 3-Feb-18      | 14-Feb-18     | 1           | Helicoccus ovis                                     | Helicoccus ovis                        | 1423                                                | 2      | S88_Yamagata_110929 | genomic DNA        |             | Lung                                                             |                                                             | 1         | 1423     | FALSE   | ncbi_filtered | 72026         |       |
| MG188744_1_1492             | 72026   | MG188744        | Helicoccus ovis strain Tongji 16S ribosomal RNA gene, partial sequence                                | 17-Oct-17     | 4-Jan-18      | 1           | Helicoccus ovis                                     | Helicoccus ovis                        | 1492                                                | 0      | Tongji              | genomic DNA        |             | artificial eye                                                   |                                                             | 1         | 1492     | FALSE   | ncbi_filtered | 72026         |       |
| KJ147072_1_1497             | 73030   | KJ147072        | Dechloromonas agitata OTU-b31 16S ribosomal RNA gene, partial sequence                                | 5-Jan-16      | 4-Jan-18      | 1           | Dechloromonas agitata                               | Dechloromonas agitata                  | 1497                                                | 0      |                     | genomic DNA        | OTU-b31     |                                                                  |                                                             | 1         | 1497     | FALSE   | ncbi_filtered | 73030         |       |
| MG205615_1_1209             | 73030   | MG205615        | Dechloromonas agitata strain A10 16S ribosomal RNA gene, partial sequence                             | 22-Oct-17     | 4-Jan-18      | 1           | Dechloromonas agitata                               | Dechloromonas agitata                  | 1506                                                | 0      | J3-1                | genomic DNA        |             | Radionuclide-contaminated groundwater, Russia                    |                                                             | 1         | 1506     | FALSE   | ncbi_filtered | 73030         |       |
| MG757543_1_1279             | 73030   | MG757543        | Dechloromonas agitata strain CKB 16S ribosomal RNA gene, partial sequence                             | 3-Feb-15      | 4-Jan-18      | 1           | Dechloromonas agitata                               | Dechloromonas agitata                  | 1506                                                | 0      | CKB; DSM 13637      | rRNA               |             | activated sludge                                                 |                                                             | 1         | 1279     | FALSE   | ncbi_filtered | 73030         |       |
| NR_024884_1_1506            | 73030   | NR_024884       | Dechloromonas agitata iS                                                                              | 20-Jun-17     | 4-Jan-18      | 1           | Dechloromonas agitata iS                            | WGS,IMPROVED_HIGH_QUALITY_DRAFT,RefSeq | Dechloromonas agitata iS                            | 1545   | 0                   | iS                 | genomic DNA |                                                                  | not provided, submitted under MIG5.2.1                      | 291128    | 292672   | FALSE   | ncbi_filtered | 73030         |       |
| AB643471_1_1467             | 74426   | AB643471        | Collinsella aerofaciens gene for 16S ribosomal RNA, partial sequence, strain: JCM 10774               | 9-Nov-12      | 4-Jan-18      | 1           | Collinsella aerofaciens                             | Collinsella aerofaciens                | 1467                                                | 0      | JCM 10774           | genomic DNA        |             |                                                                  |                                                             | 1         | 1467     | FALSE   | ncbi_filtered | 74426         |       |
| KP233257_1_1437             | 74426   | KP233257        | Collinsella aerofaciens strain D10-15 16S ribosomal RNA gene, partial sequence                        | 13-Jan-15     | 4-Jan-18      | 1           | Collinsella aerofaciens                             | Collinsella aerofaciens                | 1437                                                | 1      | D10-15              | genomic DNA        |             | feces                                                            |                                                             | 1         | 1437     | FALSE   | ncbi_filtered | 74426         |       |
| KP233339_1_1437             | 74426   | KP233339        | Collinsella aerofaciens strain D2-158 16S ribosomal RNA gene, partial sequence                        | 13-Jan-15     | 4-Jan-18      | 1           | Collinsella aerofaciens                             | Collinsella aerofaciens                | 1437                                                | 4      | D2-158              | genomic DNA        |             | feces                                                            |                                                             | 1         | 1437     | FALSE   | ncbi_filtered | 74426         |       |
| KP233396_1_1435             | 74426   | KP233396        | Collinsella aerofaciens strain D6-155 16S ribosomal RNA gene, partial sequence                        | 13-Jan-15     | 4-Jan-18      | 1           | Collinsella aerofaciens                             | Collinsella aerofaciens                | 1435                                                | 0      | D6-155              | genomic DNA        |             | feces                                                            |                                                             | 1         | 1435     | FALSE   | ncbi_filtered | 74426         |       |
| KP233442_1_1437             | 74426   | KP233442        | Collinsella aerofaciens strain D8-146 16S ribosomal RNA gene, partial sequence                        | 13-Jan-15     | 4-Jan-18      | 1           | Collinsella aerofaciens                             | Collinsella aerofaciens                | 1437                                                | 0      | D8-146              | genomic DNA        |             | feces                                                            |                                                             | 1         | 1437     | FALSE   | ncbi_filtered | 74426         |       |
| KJ940973_1_1457             | 74829   | KJ940973        | Pseudomonas balearica strain U7 16S ribosomal RNA gene, partial sequence                              | 13-Sep-14     | 4-Jan-18      | 1           | Pseudomonas balearica                               | Pseudomonas balearica                  | 1457                                                | 1      | U7                  | genomic DNA        |             |                                                                  |                                                             | 1         | 1457     | FALSE   | ncbi_filtered | 74829         |       |
| KU131271_1_1395             | 74829   | KU131271        | Pseudomonas balearica strain MSSRF DNB 16S ribosomal RNA gene, partial sequence                       | 23-Nov-15     | 4-Jan-18      | 1           | Pseudomonas balearica                               | Pseudomonas balearica                  | 1395                                                | 0      | MSSRF DNB           | genomic DNA        |             | mangrove rhizosphere                                             |                                                             | 1         | 1395     | FALSE   | ncbi_filtered | 74829         |       |
| KX713145_1_1473             | 74829   | KX713145        | Pseudomonas balearica strain S6 16S ribosomal RNA gene, partial sequence                              | 8-Feb-17      | 4-Jan-18      | 1           | Pseudomonas balearica                               | Pseudomonas balearica                  | 1473                                                | 0      | S6                  | genomic DNA        |             | gas pipeline enrichment                                          |                                                             | 1         | 1473     | FALSE   | ncbi_filtered | 74829         |       |
| NZ_CP007511_2240685_2342229 | 1123016 | NZ_CP007511     | Pseudomonas balearica DSM 6083, complete genome                                                       | 10-Apr-17     | 4-Jan-18      | 1           | Pseudomonas balearica DSM 6083                      | RefSeq                                 | Pseudomonas balearica DSM 6083                      | 1545   | 0                   | DSM6083 (=SPL402)  | genomic DNA |                                                                  | Wastewater                                                  | 2240685   | 2342229  | FALSE   | ncbi_filtered | 74829         |       |
| NZ_LINF0200028_469_2013     |         |                 |                                                                                                       |               |               |             |                                                     |                                        |                                                     |        |                     |                    |             |                                                                  |                                                             |           |          |         |               |               |       |

| seqname                     | tax_id | accession       | description                                                                                                                | modified_date | download_date | version | num_source | keywords                      | organism                              | length | ambig_count | strain                  | mol_type    | isolate                                                                                                                           | isolation_source                                                         | seq_start | seq_stop | is_type | collection    | species |
|-----------------------------|--------|-----------------|----------------------------------------------------------------------------------------------------------------------------|---------------|---------------|---------|------------|-------------------------------|---------------------------------------|--------|-------------|-------------------------|-------------|-----------------------------------------------------------------------------------------------------------------------------------|--------------------------------------------------------------------------|-----------|----------|---------|---------------|---------|
| EF561642_1_1408             | 76761  | EF561642        | <i>Pseudomonas veronii</i> strain T1/1 16S ribosomal RNA gene, partial sequence                                            | 15-Oct-09     | 4-Jan-18      | 1       |            |                               | <i>Pseudomonas veronii</i>            | 1408   | 4           | T1/1                    | genomic DNA |                                                                                                                                   |                                                                          | 1         | 1408     | FALSE   | ncbi_filtered | 76761   |
| JQ014173_1_1441             | 76761  | JQ014173        | <i>Pseudomonas veronii</i> strain JS128 16S ribosomal RNA gene, partial sequence                                           | 17-Jan-12     | 4-Jan-18      | 1       |            |                               | <i>Pseudomonas veronii</i>            | 1441   | 13          | JS128                   | genomic DNA | heavy metal contaminated soil                                                                                                     |                                                                          | 1         | 1441     | FALSE   | ncbi_filtered | 76761   |
| KT438072_1_1463             | 76761  | KT438072        | <i>Pseudomonas veronii</i> strain MS1 16S ribosomal RNA gene, partial sequence                                             | 30-Aug-15     | 4-Jan-18      | 1       |            |                               | <i>Pseudomonas veronii</i>            | 1463   | 0           | MS1                     | genomic DNA |                                                                                                                                   |                                                                          | 1         | 1463     | FALSE   | ncbi_filtered | 76761   |
| NR_028706_1_1521            | 76761  | NR_028706       | <i>Pseudomonas veronii</i> strain CP 104663 16S ribosomal RNA, partial sequence                                            | 24-Oct-17     | 4-Jan-18      | 1       |            | RefSeq                        | <i>Pseudomonas veronii</i>            | 1521   | 0           | CP_104663               | rRNA        |                                                                                                                                   |                                                                          | 1         | 1521     | TRUE    | ncbi_filtered | 76761   |
| AY206685_1_1533             | 77298  | AY206685        | <i>Pseudomonas jessenii</i> strain P506 16S ribosomal RNA, complete sequence                                               | 9-Mar-03      | 4-Jan-18      | 1       |            |                               | <i>Pseudomonas jessenii</i>           | 1533   | 4           | P506                    | genomic DNA | Spanish soil                                                                                                                      |                                                                          | 1         | 1533     | FALSE   | ncbi_filtered | 77298   |
| F150231_1_1387              | 77298  | F150231         | <i>Pseudomonas jessenii</i> 16S ribosomal RNA gene, partial sequence                                                       | 14-Jan-09     | 4-Jan-18      | 1       |            |                               | <i>Pseudomonas jessenii</i>           | 1387   | 0           | PNP-F2                  | genomic DNA | soil                                                                                                                              |                                                                          | 1         | 1387     | FALSE   | ncbi_filtered | 77298   |
| FM209480_1_1422             | 77298  | FM209480        | <i>Pseudomonas jessenii</i> partial 16S rRNA gene, strain T2P28                                                            | 11-Mar-11     | 4-Jan-18      | 1       |            |                               | <i>Pseudomonas jessenii</i>           | 1422   | 0           | T2P28                   | genomic DNA | faba bean nodules                                                                                                                 |                                                                          | 1         | 1422     | FALSE   | ncbi_filtered | 77298   |
| GU188917_1_1396             | 77298  | GU188917        | <i>Pseudomonas jessenii</i> strain BCHMAC15 16S ribosomal RNA gene, partial sequence                                       | 30-Nov-10     | 4-Jan-18      | 1       |            |                               | <i>Pseudomonas jessenii</i>           | 1396   | 1           | BCHMAC15                | genomic DNA | bark                                                                                                                              |                                                                          | 1         | 1396     | FALSE   | ncbi_filtered | 77298   |
| LN995693_1_1489             | 77298  | LN995693        | <i>Pseudomonas jessenii</i> partial 16S rRNA gene, strain R-52601                                                          | 7-Dec-16      | 4-Jan-18      | 1       |            |                               | <i>Pseudomonas jessenii</i>           | 1489   | 1           | R-52601                 | genomic DNA |                                                                                                                                   |                                                                          | 1         | 1489     | FALSE   | ncbi_filtered | 77298   |
| LN907851_1_1489             | 77585  | LN907851        | <i>Craurococcus roseus</i> partial 16S rRNA gene, type strain DSM 15488T                                                   | 19-Nov-15     | 4-Jan-18      | 1       |            |                               | <i>Craurococcus roseus</i>            | 1489   | 0           | type strain DSM 15488T  | genomic DNA |                                                                                                                                   |                                                                          | 1         | 1489     | FALSE   | ncbi_filtered | 77585   |
| NR_036877_1_1443            | 77585  | NR_036877       | <i>Craurococcus roseus</i> strain NS130 16S ribosomal RNA gene, partial sequence                                           | 3-Feb-15      | 4-Jan-18      | 1       |            | RefSeq                        | <i>Craurococcus roseus</i>            | 1443   | 0           | NS130                   | rRNA        |                                                                                                                                   |                                                                          | 1         | 1443     | TRUE    | ncbi_filtered | 77585   |
| PYG0100023_1_1369           | 77917  | PYG0100023      | <i>Fusobacterium naviforme</i> strain ATCC 25832 E153DRAFT_NODE_2_len_1485_cov_76_243095.23, whole genome shotgun sequence | 23-Mar-18     | 24-Mar-18     | 1       |            | WGS                           | <i>Fusobacterium naviforme</i>        | 1369   | 0           | ATCC 25832              | genomic DNA |                                                                                                                                   |                                                                          | 1         | 1369     | FALSE   | ncbi_filtered | 77917   |
| KC171993_1_1432             | 78544  | KC171993        | <i>Pseudomonas gessardii</i> strain JF14 16S ribosomal RNA gene, partial sequence                                          | 5-Dec-12      | 4-Jan-18      | 1       |            |                               | <i>Pseudomonas gessardii</i>          | 1432   | 0           | JF14                    | genomic DNA | soil at elevation 34-60 meters, between 115 deg 52 min-117 deg 36 min N, 24 deg 26 min-35 deg-57 min E                            |                                                                          | 1         | 1432     | FALSE   | ncbi_filtered | 78544   |
| KC790316_1_1433             | 78544  | KC790316        | <i>Pseudomonas gessardii</i> strain SN23 16S ribosomal RNA gene, partial sequence                                          | 7-Dec-15      | 4-Jan-18      | 1       |            |                               | <i>Pseudomonas gessardii</i>          | 1433   | 0           | SN23                    | genomic DNA | stem                                                                                                                              |                                                                          | 1         | 1433     | FALSE   | ncbi_filtered | 78544   |
| KF478209_1_1403             | 78544  | KF478209        | <i>Pseudomonas gessardii</i> strain TDR6 16S ribosomal RNA gene, partial sequence                                          | 14-Aug-13     | 4-Jan-18      | 1       |            |                               | <i>Pseudomonas gessardii</i>          | 1403   | 0           | TDR6                    | genomic DNA | hydrocarbon contaminated soil                                                                                                     |                                                                          | 1         | 1403     | FALSE   | ncbi_filtered | 78544   |
| KT184490_1_1425             | 78544  | KT184490        | <i>Pseudomonas gessardii</i> strain NPuril 16S ribosomal RNA gene, partial sequence                                        | 24-Nov-15     | 4-Jan-18      | 1       |            |                               | <i>Pseudomonas gessardii</i>          | 1325   | 0           | NPuril                  | genomic DNA |                                                                                                                                   |                                                                          | 1         | 1325     | FALSE   | ncbi_filtered | 78544   |
| K1783362_1_1371             | 78544  | K1783362        | <i>Pseudomonas gessardii</i> strain N-86 16S ribosomal RNA gene, partial sequence                                          | 24-Sep-17     | 4-Jan-18      | 1       |            |                               | <i>Pseudomonas gessardii</i>          | 1371   | 0           | N-86                    | genomic DNA | lake sediment core                                                                                                                |                                                                          | 1         | 1371     | FALSE   | ncbi_filtered | 78544   |
| KC292489_1_1525             | 80866  | KC292489        | <i>Delftia acidovorans</i> strain HL4-7 16S ribosomal RNA gene, partial sequence                                           | 18-Feb-13     | 4-Jan-18      | 1       |            |                               | <i>Delftia acidovorans</i>            | 1525   | 0           | HL4-7                   | genomic DNA |                                                                                                                                   |                                                                          | 1         | 1525     | FALSE   | ncbi_filtered | 80866   |
| KT369844_1_1385             | 80866  | KT369844        | <i>Delftia acidovorans</i> strain YF28-1(6) 16S ribosomal RNA gene, partial sequence                                       | 1-Oct-15      | 4-Jan-18      | 1       |            |                               | <i>Delftia acidovorans</i>            | 1385   | 0           | YF28-1(6)               | genomic DNA | Qilian mountain                                                                                                                   |                                                                          | 1         | 1385     | FALSE   | ncbi_filtered | 80866   |
| KU1712053_1_1379            | 80866  | KU1712053       | <i>Delftia acidovorans</i> strain NIHHS159 16S ribosomal RNA gene, partial sequence                                        | 29-May-16     | 4-Jan-18      | 1       |            |                               | <i>Delftia acidovorans</i>            | 1379   | 0           | NIHHS159                | genomic DNA | surface of arthropod                                                                                                              |                                                                          | 1         | 1379     | FALSE   | ncbi_filtered | 80866   |
| KXS10093_1_1430             | 80866  | KXS10093        | <i>Delftia acidovorans</i> strain BERC8 16S ribosomal RNA gene, partial sequence                                           | 4-Mar-17      | 4-Jan-18      | 1       |            |                               | <i>Delftia acidovorans</i>            | 1430   | 0           | BERC8                   | genomic DNA |                                                                                                                                   |                                                                          | 1         | 1430     | FALSE   | ncbi_filtered | 80866   |
| KY488832_1_1349             | 80866  | KY488832        | <i>Delftia acidovorans</i> strain EN142R3 16S ribosomal RNA gene, partial sequence                                         | 28-Jan-17     | 4-Jan-18      | 1       |            |                               | <i>Delftia acidovorans</i>            | 1349   | 4           | EN142R3                 | genomic DNA | plant                                                                                                                             |                                                                          | 1         | 1349     | FALSE   | ncbi_filtered | 80866   |
| JN713253_1_1347             | 81950  | JN713253        | <i>Gemella palatensis</i> canine oral taxon 089 clone OEO22 16S ribosomal RNA gene, partial sequence                       | 9-May-12      | 4-Jan-18      | 1       |            | ENV                           | <i>Gemella palatensis</i>             | 1347   | 0           |                         | genomic DNA | oral cavity subgingival plaque                                                                                                    |                                                                          | 1         | 1347     | FALSE   | ncbi_filtered | 81950   |
| NR_026469_1_1575            | 81950  | NR_026469       | <i>Gemella palatensis</i> strain M663-98-1 16S ribosomal RNA gene, partial sequence                                        | 3-Feb-15      | 4-Jan-18      | 1       |            | RefSeq                        | <i>Gemella palatensis</i>             | 1575   | 7           | M663-98-1; CCLG 39489   | rRNA        |                                                                                                                                   |                                                                          | 1         | 1375     | TRUE    | ncbi_filtered | 81950   |
| NR_029349_1_1351            | 82135  | NR_029349       | <i>Atopobium vaginae</i> strain 961*00022/98 16S ribosomal RNA gene, partial sequence                                      | 3-Feb-15      | 4-Jan-18      | 1       |            | RefSeq                        | <i>Atopobium vaginae</i>              | 1351   | 4           | 961*00022/98; DSM 15829 | rRNA        |                                                                                                                                   |                                                                          | 1         | 1351     | TRUE    | ncbi_filtered | 82135   |
| NZ_ACGK0200001_81970_83494  | 525256 | NZ_ACGK0200001  | <i>Atopobium vaginae</i> DSM 15829 Contig27.fasta, whole genome shotgun sequence                                           | 7-Apr-17      | 4-Jan-18      | 1       |            | WGS;RefSeq                    | <i>Atopobium vaginae</i> DSM 15829    | 1525   | 0           | DSM 15829               | genomic DNA | vagina                                                                                                                            |                                                                          | 81970     | 83494    | TRUE    | ncbi_filtered | 82135   |
| NZ_AEDQ01000024_3244_4771   | 866774 | NZ_AEDQ01000024 | <i>Atopobium vaginae</i> PB189-T1-4 contig00045, whole genome shotgun sequence                                             | 15-Nov-17     | 4-Jan-18      | 1       |            | WGS;HIGH_QUALITY_DRAFT;RefSeq | <i>Atopobium vaginae</i> PB189-T1-4   | 1528   | 0           | PB189-T1-4              | genomic DNA | biological product [ENVO:02000043]                                                                                                |                                                                          | 3244      | 4771     | TRUE    | ncbi_filtered | 82135   |
| LT558814_1_1507             | 82347  | LT558814        | <i>Faccklamia languida</i> partial 16S rRNA gene, strain Marseille-P1318                                                   | 1-May-16      | 4-Jan-18      | 1       |            |                               | <i>Faccklamia languida</i>            | 1507   | 0           | Marseille-P1318         | genomic DNA | Human stool                                                                                                                       |                                                                          | 1         | 1507     | FALSE   | ncbi_filtered | 82347   |
| NR_026487_1_1473            | 82347  | NR_026487       | <i>Faccklamia languida</i> strain 1144-97 16S ribosomal RNA gene, partial sequence                                         | 3-Feb-15      | 4-Jan-18      | 1       |            | RefSeq                        | <i>Faccklamia languida</i>            | 1473   | 3           | 1144-97; CCLG 37842     | rRNA        |                                                                                                                                   |                                                                          | 1         | 1473     | TRUE    | ncbi_filtered | 82347   |
| NZ_JH601133_1253826_1253831 | 883113 | NZ_JH601133     | <i>Faccklamia languida</i> CCLG 37842 supercont1.1, whole genome shotgun sequence                                          | 17-Apr-17     | 4-Jan-18      | 1       |            | WGS;HIGH_QUALITY_DRAFT;RefSeq | <i>Faccklamia languida</i> CCLG 37842 | 1556   | 0           | CCLG 37842              | genomic DNA | biological product [ENVO:02000043]                                                                                                |                                                                          | 1253826   | 1253831  | TRUE    | ncbi_filtered | 82347   |
| NZ_JH601133_1561278_1562833 | 883113 | NZ_JH601133     | <i>Faccklamia languida</i> CCLG 37842 supercont1.1, whole genome shotgun sequence                                          | 17-Apr-17     | 4-Jan-18      | 1       |            | WGS;HIGH_QUALITY_DRAFT;RefSeq | <i>Faccklamia languida</i> CCLG 37842 | 1556   | 0           | CCLG 37842              | genomic DNA | biological product [ENVO:02000043]                                                                                                |                                                                          | 1561278   | 1562833  | TRUE    | ncbi_filtered | 82347   |
| HQ202856_1_1457             | 82801  | HQ202856        | <i>Desemzia incerta</i> strain T-35 16S ribosomal RNA gene, partial sequence                                               | 24-Oct-10     | 4-Jan-18      | 1       |            |                               | <i>Desemzia incerta</i>               | 1457   | 0           | T-35                    | genomic DNA | soil                                                                                                                              |                                                                          | 1         | 1457     | FALSE   | ncbi_filtered | 82801   |
| HQ336336_1_1481             | 82801  | HQ336336        | <i>Desemzia incerta</i> strain NMRL00B-5 16S ribosomal RNA gene, partial sequence                                          | 4-Apr-11      | 4-Jan-18      | 1       |            |                               | <i>Desemzia incerta</i>               | 1481   | 0           | NMRL00B-5               | genomic DNA |                                                                                                                                   |                                                                          | 1         | 1481     | FALSE   | ncbi_filtered | 82801   |
| KY827814_1_1444             | 82801  | KY827814        | <i>Desemzia incerta</i> strain OA22 16S ribosomal RNA gene, partial sequence                                               | 27-Sep-17     | 4-Jan-18      | 1       |            |                               | <i>Desemzia incerta</i>               | 1444   | 0           | OA22                    | genomic DNA |                                                                                                                                   |                                                                          | 1         | 1444     | FALSE   | ncbi_filtered | 82801   |
| MH000676_1_1453             | 82801  | MH000676        | <i>Desemzia incerta</i> strain T25 16S ribosomal RNA gene, partial sequence                                                | 4-Mar-18      | 12-Mar-18     | 1       |            |                               | <i>Desemzia incerta</i>               | 1453   | 0           | T25                     | genomic DNA |                                                                                                                                   |                                                                          | 1         | 1453     | FALSE   | ncbi_filtered | 82801   |
| NR_119259_1_1390            | 82801  | NR_119259       | <i>Desemzia incerta</i> strain DSM 20581 16S ribosomal RNA gene, partial sequence                                          | 3-Feb-15      | 4-Jan-18      | 1       |            | RefSeq                        | <i>Desemzia incerta</i>               | 1390   | 0           | DSM 20581               | rRNA        |                                                                                                                                   |                                                                          | 1         | 1390     | TRUE    | ncbi_filtered | 82801   |
| EU434437_1_1470             | 82803  | EU434437        | <i>Trichococcus flocculiformis</i> strain a209 16S ribosomal RNA gene, partial sequence                                    | 3-Jun-09      | 4-Jan-18      | 1       |            |                               | <i>Trichococcus flocculiformis</i>    | 1470   | 0           | a209                    | genomic DNA | effluent of an antibiotic production wastewater treatment plant                                                                   |                                                                          | 1         | 1470     | FALSE   | ncbi_filtered | 82803   |
| EU434516_1_1475             | 82803  | EU434516        | <i>Trichococcus flocculiformis</i> strain b217 16S ribosomal RNA gene, partial sequence                                    | 3-Jun-09      | 4-Jan-18      | 1       |            |                               | <i>Trichococcus flocculiformis</i>    | 1475   | 0           | b217                    | genomic DNA | receiving river of the antibiotic production wastewater effluent receiving river of the antibiotic production wastewater effluent |                                                                          | 1         | 1475     | FALSE   | ncbi_filtered | 82803   |
| EU434522_1_1471             | 82803  | EU434522        | <i>Trichococcus flocculiformis</i> strain b328 16S ribosomal RNA gene, partial sequence                                    | 3-Jun-09      | 4-Jan-18      | 1       |            |                               | <i>Trichococcus flocculiformis</i>    | 1471   | 0           | b328                    | genomic DNA | receiving river of the antibiotic production wastewater effluent                                                                  |                                                                          | 1         | 1471     | FALSE   | ncbi_filtered | 82803   |
| EU434555_1_1476             | 82803  | EU434555        | <i>Trichococcus flocculiformis</i> strain b206 16S ribosomal RNA gene, partial sequence                                    | 3-Jun-09      | 4-Jan-18      | 1       |            |                               | <i>Trichococcus flocculiformis</i>    | 1476   | 0           | b206                    | genomic DNA | receiving river of the antibiotic production wastewater effluent                                                                  |                                                                          | 1         | 1476     | FALSE   | ncbi_filtered | 82803   |
| NZ_FIM201000022_41151_42717 | 82803  | NZ_FIM201000022 | <i>Trichococcus flocculiformis</i> isolate Trichococcus flocculiformis, whole genome shotgun sequence                      | 31-May-17     | 4-Jan-18      | 1       |            | WGS;RefSeq                    | <i>Trichococcus flocculiformis</i>    | 1567   | 0           |                         | genomic DNA | Trichococcus flocculiformis                                                                                                       |                                                                          | 41151     | 42717    | FALSE   | ncbi_filtered | 82803   |
| DQ086780_1_1353             | 82995  | DQ086780        | <i>Serratia grimesii</i> strain I21 16S ribosomal RNA gene, partial sequence                                               | 3-Jul-05      | 4-Jan-18      | 1       |            |                               | <i>Serratia grimesii</i>              | 1353   | 0           | I21                     | genomic DNA |                                                                                                                                   |                                                                          | 1         | 1353     | FALSE   | ncbi_filtered | 82995   |
| KC178579_1_1505             | 82995  | KC178579        | <i>Serratia grimesii</i> strain CI-05 16S ribosomal RNA gene, partial sequence                                             | 14-Jan-13     | 4-Jan-18      | 1       |            |                               | <i>Serratia grimesii</i>              | 1505   | 0           | CI-05                   | genomic DNA |                                                                                                                                   |                                                                          | 1         | 1505     | FALSE   | ncbi_filtered | 82995   |
| LT883155_351625_353164      | 82995  | LT883155        | <i>Serratia grimesii</i> isolate BXF1 genome assembly, chromosome: chr                                                     | 20-Nov-17     | 4-Jan-18      | 1       |            |                               | <i>Serratia grimesii</i>              | 1540   | 0           |                         | genomic DNA | BXF1                                                                                                                              | Diseased Pinus pinaster tree in Oliveira do Hospital, Coimbra (Portugal) | 351625    | 353164   | FALSE   | ncbi_filtered | 82995   |
| LT883155_876250_877789      | 82995  | LT883155        | <i>Serratia grimesii</i> isolate BXF1 genome assembly, chromosome: chr                                                     | 20-Nov-17     | 4-Jan-18      | 1       |            |                               | <i>Serratia grimesii</i>              | 1540   | 0           |                         | genomic DNA | BXF1                                                                                                                              | Diseased Pinus pinaster tree in Oliveira do Hospital, Coimbra (Portugal) | 876250    | 877789   | FALSE   | ncbi_filtered | 82995   |
| M6190850_1_1379             | 82995  | M6190850        | <i>Serratia grimesii</i> strain CP_D1 16S ribosomal RNA gene, partial sequence                                             | 18-Dec-17     | 4-Jan-18      | 1       |            |                               | <i>Serratia grimesii</i>              | 1379   | 0           | CP_D1                   | genomic DNA | Coregonus peled                                                                                                                   |                                                                          | 1         | 1379     | FALSE   | ncbi_filtered | 82995   |
| AF099202_1_1463             | 83776  | AF099202        | <i>Arthro bacter davidianii</i> 16S ribosomal RNA gene, partial sequence                                                   | 20-Feb-02     | 4-Jan-18      | 1       |            |                               | <i>Arthro bacter davidianii</i>       | 1463   | 0           | RSX II                  | genomic DNA |                                                                                                                                   |                                                                          | 1         | 1463     | FALSE   | ncbi_filtered | 83776   |
| NR_026491_1_1472            | 84024  | NR_026491       | <i>Clostridium sporicum</i> strain DS1 16S ribosomal RNA gene, partial sequence                                            | 3-Feb-15      | 4-Jan-18      | 1       |            | RefSeq                        | <i>Clostridium sporicum</i>           | 1472   | 0           | DS1; DSM 5521           | rRNA        |                                                                                                                                   |                                                                          | 1         | 1472     | TRUE    | ncbi_filtered | 84024   |
| NZ_CXZK0100047_1245_2689    | 84024  | NZ_CXZK0100047  | <i>Clostridium sporicum</i> strain 27895TDY5834856, whole genome shotgun sequence                                          | 17-Apr-17     | 4-Jan-18      | 1       |            | WGS;RefSeq                    | <i>Clostridium sporicum</i>           | 1445   | 0           | 27895TDY5834856         | genomic DNA | faeces                                                                                                                            |                                                                          | 1245      | 2689     | FALSE   | ncbi_filtered | 84024   |
| NR_029355_1_1435            | 84026  | NR_029355       | <i>[Clostridium] methylospirillum</i> strain R2 16S ribosomal RNA gene, partial sequence                                   | 3-Feb-15      | 4-Jan-18      | 1       |            | RefSeq                        | <i>[Clostridium] methylospirillum</i> | 1435   | 0           | R2; DSM 5476            | rRNA        |                                                                                                                                   |                                                                          | 1         | 1435     | TRUE    | ncbi_filtered | 84026   |
| NZ_EQ973341_3509_5040       | 537013 |                 |                                                                                                                            |               |               |         |            |                               |                                       |        |             |                         |             |                                                                                                                                   |                                                                          |           |          |         |               |         |

| seqname                     | tax_id  | accession       | description                                                                                                          | modified_date | download_date | version_num | source                                         | keywords                               | organism                                       | length | ambig_count | strain            | mol_type    | isolate     | isolation_source                                                                              | seq_start | seq_stop | is_type | collection    | species       |       |
|-----------------------------|---------|-----------------|----------------------------------------------------------------------------------------------------------------------|---------------|---------------|-------------|------------------------------------------------|----------------------------------------|------------------------------------------------|--------|-------------|-------------------|-------------|-------------|-----------------------------------------------------------------------------------------------|-----------|----------|---------|---------------|---------------|-------|
| AB775572_1_1311             | 84135   | AB775572        | Gemella sanguinis gene for 16S rRNA, partial sequence, strain: NTUH_2000                                             | 14-Jun-14     | 4-Jan-18      | 1           | Gemella sanguinis                              |                                        | Gemella sanguinis                              | 1311   | 0           | NTUH_2000         | genomic DNA |             | human blood culture                                                                           | 1         | 1311     | FALSE   | ncbi_filtered | 84135         |       |
| AB775573_1_1311             | 84135   | AB775573        | Gemella sanguinis gene for 16S rRNA, partial sequence, strain: NTUH_2825                                             | 14-Jun-14     | 4-Jan-18      | 1           | Gemella sanguinis                              |                                        | Gemella sanguinis                              | 1311   | 0           | NTUH_2825         | genomic DNA |             | human blood culture                                                                           | 1         | 1311     | FALSE   | ncbi_filtered | 84135         |       |
| AB775575_1_1311             | 84135   | AB775575        | Gemella sanguinis gene for 16S rRNA, partial sequence, strain: NTUH_8428                                             | 14-Jun-14     | 4-Jan-18      | 1           | Gemella sanguinis                              |                                        | Gemella sanguinis                              | 1311   | 0           | NTUH_8428         | genomic DNA |             | human blood culture                                                                           | 1         | 1311     | FALSE   | ncbi_filtered | 84135         |       |
| GU561409_1_1442             | 84135   | GU561409        | Gemella sanguinis strain PTE3 16S ribosomal RNA gene, partial sequence                                               | 13-Mar-10     | 4-Jan-18      | 1           | Gemella sanguinis                              |                                        | Gemella sanguinis                              | 1442   | 0           | PTE3              | genomic DNA |             | oral cavity                                                                                   | 1         | 1442     | FALSE   | ncbi_filtered | 84135         |       |
| NZ_ACRY0200003_306_1866     | 562983  | NZ_ACRY0200003  | Gemella sanguinis M325 acqcz-supercont2.3, whole genome shotgun sequence                                             | 8-Apr-17      | 4-Jan-18      | 1           | Gemella sanguinis M325                         | WGS;RefSeq                             | Gemella sanguinis M325                         | 1561   | 0           | M325              | genomic DNA |             |                                                                                               |           | 306      | 1866    | FALSE         | ncbi_filtered | 84135 |
| AM409316_1_1428             | 85044   | AM409316        | Williamsia muralis partial 16S rRNA gene, strain 957414                                                              | 26-Mar-08     | 4-Jan-18      | 1           | Williamsia muralis                             | 16S ribosomal RNA;16S rRNA gene        | Williamsia muralis                             | 1428   | 1           | 957414            | genomic DNA |             |                                                                                               |           | 1        | 1428    | FALSE         | ncbi_filtered | 85044 |
| AY986734_1_1438             | 85044   | AY986734        | Williamsia muralis isolate 500/04 16S ribosomal RNA gene, partial sequence                                           | 26-Jul-05     | 4-Jan-18      | 1           | Williamsia muralis                             |                                        | Williamsia muralis                             | 1438   | 0           |                   | genomic DNA | 500/04      |                                                                                               |           | 1        | 1438    | FALSE         | ncbi_filtered | 85044 |
| DQ223662_1_1423             | 85044   | DQ223662        | Williamsia muralis 16S ribosomal RNA gene, partial sequence                                                          | 18-Jun-06     | 4-Jan-18      | 1           | Williamsia muralis                             |                                        | Williamsia muralis                             | 1423   | 0           |                   | genomic DNA | zf-iHPH2    | ice cores, East Rongbuk Glacier, Mt. Qomolangma (Everest)                                     |           | 1        | 1423    | FALSE         | ncbi_filtered | 85044 |
| JN180186_1_1491             | 85044   | JN180186        | Williamsia muralis strain 3541 16S ribosomal RNA gene, partial sequence                                              | 31-Jul-11     | 4-Jan-18      | 1           | Williamsia muralis                             |                                        | Williamsia muralis                             | 1491   | 0           | 3541              | genomic DNA |             | soil                                                                                          |           | 1        | 1491    | FALSE         | ncbi_filtered | 85044 |
| NR_037083_1_1465            | 85044   | NR_037083       | Williamsia muralis strain MA140/96 16S ribosomal RNA gene, partial sequence                                          | 3-Feb-15      | 4-Jan-18      | 1           | Williamsia muralis                             | RefSeq                                 | Williamsia muralis                             | 1465   | 0           | MA140/96_DSM44343 | rRNA        |             |                                                                                               |           | 1        | 1465    | TRUE          | ncbi_filtered | 85044 |
| F1169468_1_1445             | 85698   | F1169468        | Achromobacter xylooxidans 16S ribosomal RNA gene, partial sequence                                                   | 2-Sep-09      | 4-Jan-18      | 1           | Achromobacter xylooxidans                      |                                        | Achromobacter xylooxidans                      | 1445   | 0           | ade-3             | genomic DNA |             | SINOPEC (refinery wastewater)                                                                 |           | 1        | 1445    | FALSE         | ncbi_filtered | 85698 |
| KJ781406_1_1386             | 85698   | KJ781406        | Achromobacter xylooxidans strain CF-536 16S ribosomal RNA gene, partial sequence                                     | 30-Jun-14     | 4-Jan-18      | 1           | Achromobacter xylooxidans                      |                                        | Achromobacter xylooxidans                      | 1386   | 0           | CF-536            | genomic DNA |             | domestic wastewater sediment                                                                  |           | 1        | 1386    | FALSE         | ncbi_filtered | 85698 |
| KU240050_1_1439             | 85698   | KU240050        | Achromobacter xylooxidans strain S3 16S ribosomal RNA gene, partial sequence                                         | 31-Jan-16     | 4-Jan-18      | 1           | Achromobacter xylooxidans                      |                                        | Achromobacter xylooxidans                      | 1439   | 0           | S3                | genomic DNA |             | mangrove soil                                                                                 |           | 1        | 1439    | FALSE         | ncbi_filtered | 85698 |
| KY488284_1_1352             | 85698   | KY488284        | Achromobacter xylooxidans strain EN14AR3 16S ribosomal RNA gene, partial sequence                                    | 28-Jan-17     | 4-Jan-18      | 1           | Achromobacter xylooxidans                      |                                        | Achromobacter xylooxidans                      | 1352   | 6           | EN14AR3           | genomic DNA |             | plant                                                                                         |           | 1        | 1352    | FALSE         | ncbi_filtered | 85698 |
| MG904943_1_1352             | 85698   | MG904943        | Achromobacter xylooxidans strain E27 16S ribosomal RNA gene, partial sequence                                        | 11-Feb-18     | 14-Feb-18     | 1           | Achromobacter xylooxidans                      |                                        | Achromobacter xylooxidans                      | 1352   | 0           | E27               | genomic DNA |             | Soil-Codazzi_Cesar                                                                            |           | 1        | 1352    | FALSE         | ncbi_filtered | 85698 |
| JG689182_1_1414             | 86182   | JG689182        | Curvibacter lanceolatus strain B1RO10 16S ribosomal RNA gene, partial sequence                                       | 6-Jul-16      | 4-Jan-18      | 1           | Curvibacter lanceolatus                        |                                        | Curvibacter lanceolatus                        | 1414   | 0           | B1RO10            | genomic DNA |             | mineral water                                                                                 |           | 1        | 1414    | FALSE         | ncbi_filtered | 86182 |
| NR_024702_1_1508            | 86182   | NR_024702       | Curvibacter lanceolatus strain ATCC 14669 16S ribosomal RNA gene, partial sequence                                   | 3-Feb-15      | 4-Jan-18      | 1           | Curvibacter lanceolatus                        | RefSeq                                 | Curvibacter lanceolatus                        | 1508   | 6           | ATCC 14669        | rRNA        |             |                                                                                               |           | 1        | 1508    | TRUE          | ncbi_filtered | 86182 |
| NR_114201_1_1436            | 86182   | NR_114201       | Curvibacter lanceolatus strain NBRC 103051 16S ribosomal RNA gene, partial sequence                                  | 3-Feb-15      | 4-Jan-18      | 1           | Curvibacter lanceolatus                        | RefSeq                                 | Curvibacter lanceolatus                        | 1456   | 0           | NBRC 103051       | rRNA        |             |                                                                                               |           | 1        | 1456    | TRUE          | ncbi_filtered | 86182 |
| GU971279_1_1455             | 86188   | GU971279        | Pseudomonas geniculata strain AF8 7 16S ribosomal RNA gene, partial sequence                                         | 28-Apr-10     | 4-Jan-18      | 1           | [Pseudomonas] geniculata                       |                                        | [Pseudomonas] geniculata                       | 1435   | 0           | AF8 7             | genomic DNA |             | limestone mine soil sample, 200 ft depth                                                      |           | 1        | 1435    | FALSE         | ncbi_filtered | 86188 |
| JF460765_1_1439             | 86188   | JF460765        | Pseudomonas geniculata strain Ka17 16S ribosomal RNA gene, partial sequence                                          | 27-Aug-11     | 4-Jan-18      | 1           | [Pseudomonas] geniculata                       |                                        | [Pseudomonas] geniculata                       | 1439   | 0           | Ka17              | genomic DNA |             |                                                                                               |           | 1        | 1439    | FALSE         | ncbi_filtered | 86188 |
| KJ396805_1_1417             | 86188   | KJ396805        | [Pseudomonas] geniculata strain IR21 16S ribosomal RNA gene, partial sequence                                        | 5-Oct-15      | 4-Jan-18      | 1           | [Pseudomonas] geniculata                       |                                        | [Pseudomonas] geniculata                       | 1417   | 0           | IR21              | genomic DNA |             | river water                                                                                   |           | 1        | 1417    | FALSE         | ncbi_filtered | 86188 |
| KT580576_1_1306             | 86188   | KT580576        | [Pseudomonas] geniculata strain 19 16S ribosomal RNA gene, partial sequence                                          | 29-Aug-15     | 4-Jan-18      | 1           | [Pseudomonas] geniculata                       |                                        | [Pseudomonas] geniculata                       | 1506   | 0           | Can1-49           | genomic DNA |             |                                                                                               |           | 1        | 1506    | FALSE         | ncbi_filtered | 86188 |
| KO218312_1_1582             | 86188   | KO218312        | [Pseudomonas] geniculata strain 19 16S ribosomal RNA gene, partial sequence                                          | 20-Jun-16     | 4-Jan-18      | 1           | [Pseudomonas] geniculata                       |                                        | [Pseudomonas] geniculata                       | 1382   | 0           | 19                | genomic DNA |             | male mucus                                                                                    |           | 1        | 1382    | FALSE         | ncbi_filtered | 86188 |
| NR_028608_1_1470            | 86332   | NR_028608       | Mogibacterium pumilum strain D2-18 16S ribosomal RNA gene, partial sequence                                          | 3-Feb-15      | 4-Jan-18      | 1           | Mogibacterium pumilum                          | RefSeq                                 | Mogibacterium pumilum                          | 1470   | 2           | D2-18;ATCC700696  | rRNA        |             |                                                                                               |           | 1        | 1470    | TRUE          | ncbi_filtered | 86332 |
| NZ_CP016199_1106004_1107522 | 86332   | NZ_CP016199     | Mogibacterium pumilum strain ATCC 700696 genome                                                                      | 10-Aug-17     | 4-Jan-18      | 1           | Mogibacterium pumilum                          | RefSeq                                 | Mogibacterium pumilum                          | 1519   | 0           | ATCC 700696       | genomic DNA |             | curlette                                                                                      |           | 1106004  | 1107522 | TRUE          | ncbi_filtered | 86332 |
| NZ_CP016199_1851380_1852899 | 86332   | NZ_CP016199     | Mogibacterium pumilum strain ATCC 700696 genome                                                                      | 10-Aug-17     | 4-Jan-18      | 1           | Mogibacterium pumilum                          | RefSeq                                 | Mogibacterium pumilum                          | 1519   | 0           | ATCC 700696       | genomic DNA |             |                                                                                               |           | 1851380  | 1852899 | TRUE          | ncbi_filtered | 86332 |
| LC096233_1_1455             | 86333   | LC096233        | Mogibacterium vesicum gene for 16S ribosomal RNA, partial sequence, strain: JCM 11203                                | 13-Nov-15     | 4-Jan-18      | 1           | Mogibacterium vesicum                          |                                        | Mogibacterium vesicum                          | 1455   | 1           | JCM 11203         | genomic DNA |             |                                                                                               |           | 1        | 1455    | TRUE          | ncbi_filtered | 86333 |
| NR_024712_1_1477            | 86333   | NR_024712       | Mogibacterium vesicum strain ATCC 700697 16S ribosomal RNA gene, partial sequence                                    | 3-Feb-15      | 4-Jan-18      | 1           | Mogibacterium vesicum                          | RefSeq                                 | Mogibacterium vesicum                          | 1477   | 0           | ATCC 700697       | rRNA        |             |                                                                                               |           | 1        | 1477    | TRUE          | ncbi_filtered | 86333 |
| AY167817_1_1338             | 86668   | AY167817        | Bacillus niacini strain SAFN-011 16S ribosomal RNA gene, partial sequence                                            | 9-Feb-09      | 4-Jan-18      | 1           | Bacillus niacini                               |                                        | Bacillus niacini                               | 1338   | 0           | SAFN-011          | genomic DNA |             |                                                                                               |           | 1        | 1338    | FALSE         | ncbi_filtered | 86668 |
| GU339292_1_1497             | 86668   | GU339292        | Bacillus niacini strain EH67 16S ribosomal RNA gene, partial sequence                                                | 7-Feb-10      | 4-Jan-18      | 1           | Bacillus niacini                               |                                        | Bacillus niacini                               | 1497   | 0           | EH67              | genomic DNA |             | sampling site R3, 1000 m away from sites R1 and R2 at Rajkot industrial estate (control site) |           | 1        | 1497    | FALSE         | ncbi_filtered | 86668 |
| KC818119_1_1475             | 86668   | KC818119        | Bacillus niacini strain BTH1 16S ribosomal RNA gene, partial sequence                                                | 28-May-13     | 4-Jan-18      | 1           | Bacillus niacini                               |                                        | Bacillus niacini                               | 1475   | 0           | BTH1              | genomic DNA |             | Bemisia tabaci honeydew                                                                       |           | 1        | 1475    | FALSE         | ncbi_filtered | 86668 |
| KX493312_1_1250             | 86668   | KX493312        | Bacillus niacini strain NBR5A 16S ribosomal RNA gene, partial sequence                                               | 28-Oct-17     | 4-Jan-18      | 1           | Bacillus niacini                               |                                        | Bacillus niacini                               | 1520   | 0           | NBR5A             | genomic DNA |             |                                                                                               |           | 1        | 1520    | FALSE         | ncbi_filtered | 86668 |
| LN774659_1_1227             | 86668   | LN774659        | Bacillus niacini partial 16S rRNA gene, isolate 1111MAR21U8                                                          | 27-Feb-15     | 4-Jan-18      | 1           | Bacillus niacini                               |                                        | Bacillus niacini                               | 1227   | 0           |                   | genomic DNA | 1111MAR21U8 | air sample                                                                                    |           | 1        | 1227    | FALSE         | ncbi_filtered | 86668 |
| KP192302_1_1415             | 87541   | KP192302        | Aerococcus christensenii strain KA00635 16S ribosomal RNA gene, partial sequence                                     | 1-Apr-15      | 4-Jan-18      | 1           | Aerococcus christensenii                       |                                        | Aerococcus christensenii                       | 1415   | 1           | KA00635           | genomic DNA |             | vaginal fluid from subject with bacterial vaginosis                                           |           | 1        | 1415    | FALSE         | ncbi_filtered | 87541 |
| NR_044929_1_1450            | 87541   | NR_044929       | Aerococcus christensenii strain CCG 28831 16S ribosomal RNA gene, partial sequence                                   | 3-Feb-15      | 4-Jan-18      | 2           | Aerococcus christensenii                       | RefSeq                                 | Aerococcus christensenii                       | 1450   | 11          | CCG 28831         | rRNA        |             |                                                                                               |           | 1        | 1450    | TRUE          | ncbi_filtered | 87541 |
| NZ_AMZK01000007_19_1574     | 525247  | NZ_AMZK01000007 | Aerococcus christensenii DSM 15819 = CCG 28831 strain DSM 15819 contig_cov_167.819351, whole genome shotgun sequence | 11-Apr-17     | 4-Jan-18      | 1           | Aerococcus christensenii DSM 15819 = CCG 28831 | WGS;RefSeq                             | Aerococcus christensenii DSM 15819 = CCG 28831 | 1556   | 0           | DSM 15819         | genomic DNA |             | vagina                                                                                        |           | 19       | 1574    | TRUE          | ncbi_filtered | 87541 |
| NZ_AENNO1000008_61_1612     | 901337  | NZ_AENNO1000008 | Eremococcus coleocola ACS-139-V-CoIB contig00020, whole genome shotgun sequence                                      | 15-Nov-17     | 4-Jan-18      | 1           | Eremococcus coleocola ACS-139-V-CoIB           | WGS;HIGH_QUALITY_DRAFT;RefSeq          | Eremococcus coleocola ACS-139-V-CoIB           | 1552   | 0           | ACS-139-V-CoIB    | genomic DNA |             | biological product [ENVO:02000043]                                                            |           | 61       | 1612    | FALSE         | ncbi_filtered | 88132 |
| NZ_AUAT01000051_59_1498     | 1121871 | NZ_AUAT01000051 | Eremococcus coleocola DSM 15696 whole genome shotgun sequence                                                        | 8-Apr-17      | 4-Jan-18      | 1           | Eremococcus coleocola DSM 15696                | WGS;IMPROVED_HIGH_QUALITY_DRAFT;RefSeq | Eremococcus coleocola DSM 15696                | 1440   | 0           | DSM 15696         | genomic DNA |             |                                                                                               |           | 59       | 1498    | TRUE          | ncbi_filtered | 88132 |
| FR865877_1_1471             | 88139   | FR865877        | Modestobacter multiseptatus partial 16S rRNA gene, strain CO2-17                                                     | 24-May-12     | 4-Jan-18      | 1           | Modestobacter multiseptatus                    |                                        | Modestobacter multiseptatus                    | 1471   | 0           | CO2-17            | genomic DNA |             | stone                                                                                         |           | 1        | 1471    | FALSE         | ncbi_filtered | 88139 |
| FR865878_1_1460             | 88139   | FR865878        | Modestobacter multiseptatus partial 16S rRNA gene, strain CO2-36                                                     | 24-May-12     | 4-Jan-18      | 1           | Modestobacter multiseptatus                    |                                        | Modestobacter multiseptatus                    | 1460   | 0           | CO2-36            | genomic DNA |             | stone                                                                                         |           | 1        | 1460    | FALSE         | ncbi_filtered | 88139 |
| FR865882_1_1425             | 88139   | FR865882        | Modestobacter multiseptatus partial 16S rRNA gene, strain CO3-45                                                     | 24-May-12     | 4-Jan-18      | 1           | Modestobacter multiseptatus                    |                                        | Modestobacter multiseptatus                    | 1425   | 0           | CO3-45            | genomic DNA |             | stone                                                                                         |           | 1        | 1425    | FALSE         | ncbi_filtered | 88139 |
| FR865895_1_1438             | 88139   | FR865895        | Modestobacter multiseptatus partial 16S rRNA gene, strain CO3-35                                                     | 24-May-12     | 4-Jan-18      | 1           | Modestobacter multiseptatus                    |                                        | Modestobacter multiseptatus                    | 1338   | 0           | CO3-35            | genomic DNA |             | stone                                                                                         |           | 1        | 1338    | FALSE         | ncbi_filtered | 88139 |
| FR865898_1_1428             | 88139   | FR865898        | Modestobacter multiseptatus partial 16S rRNA gene, strain CO3-43                                                     | 24-May-12     | 4-Jan-18      | 1           | Modestobacter multiseptatus                    |                                        | Modestobacter multiseptatus                    | 1428   | 0           | CO3-43            | genomic DNA |             | stone                                                                                         |           | 1        | 1428    | FALSE         | ncbi_filtered | 88139 |
| NR_026509_1_1421            | 88164   | NR_026509       | Lactobacillus formicilis strain TV1018 16S ribosomal RNA gene, partial sequence                                      | 3-Feb-15      | 4-Jan-18      | 1           | Lactobacillus formicilis                       | RefSeq                                 | Lactobacillus formicilis                       | 1421   | 1           | TV1018;DSM13171   | rRNA        |             |                                                                                               |           | 1        | 1421    | TRUE          | ncbi_filtered | 88164 |
| JX417442_1_1453             | 89065   | JX417442        | Pseudomonas abietaniphila strain 62 16S ribosomal RNA gene, partial sequence                                         | 4-Aug-12      | 4-Jan-18      | 1           | Pseudomonas abietaniphila                      |                                        | Pseudomonas abietaniphila                      | 1453   | 1           | 62                | genomic DNA |             |                                                                                               |           | 1        | 1453    | FALSE         | ncbi_filtered | 89065 |
| JX417443_1_1455             | 89065   | JX417443        | Pseudomonas abietaniphila strain 99 16S ribosomal RNA gene, partial sequence                                         | 4-Aug-12      | 4-Jan-18      | 1           | Pseudomonas abietaniphila                      |                                        | Pseudomonas abietaniphila                      | 1455   | 0           | 99                | genomic DNA |             |                                                                                               |           | 1        | 1455    | FALSE         | ncbi_filtered | 89065 |
| KP267838_1_1484             | 89065   | KP267838        | Pseudomonas abietaniphila strain RD17.8 16S ribosomal RNA gene, partial sequence                                     | 3-May-15      | 4-Jan-18      | 1           | Pseudomonas abietaniphila                      |                                        | Pseudomonas abietaniphila                      | 1484   | 0           | RD17.8            | genomic DNA |             | rhizospheric soil of Caesalpinia spinosa (lar)                                                |           | 1        | 1484    | FALSE         | ncbi_filtered | 89065 |
| NZ_BBQ01000017_79_1624      | 89065   | NZ_BBQ01000017  | Pseudomonas abietaniphila strain KF701, whole genome shotgun sequence                                                | 18-Apr-17     | 4-Jan-18      | 1           | Pseudomonas abietaniphila                      | WGS;RefSeq;STANDARD_DRAFT              | Pseudomonas abietaniphila                      | 1546   | 0           | KF701             | genomic DNA |             |                                                                                               |           | 79       | 1624    | FALSE         | ncbi_filtered | 89065 |
| NZ_FNCO01000040_3466_5011   | 89065   | NZ_FNCO01000040 | Pseudomonas abietaniphila strain ATCC 700689, whole genome shotgun sequence                                          | 13-Apr-17     | 4-Jan-18      | 1           | Pseudomonas abietaniphila                      | WGS;RefSeq                             | Pseudomonas abietaniphila                      | 1546   | 0           | ATCC 700689       | genomic DNA |             |                                                                                               |           | 3466     | 5011    | TRUE          | ncbi_filtered | 89065 |
| AB023971_1_1404             | 89152   | AB023971        | Clostridium hiranonis gene for 16S rRNA, partial sequence, strain HD-17                                              | 14-Jun-01     | 4-Jan-18      | 1           | [Clostridium] hiranonis                        |                                        | [Clostridium] hiranonis                        |        |             |                   |             |             |                                                                                               |           |          |         |               |               |       |

| seqname                       | tax_id  | accession      | description                                                                             | modified_date | download_date | version | num | source | keywords                      | organism                            | length | ambig | count | strain             | mol_type    | isolate | isolation_source                              | seq_start | seq_end | is_type | collection    | species |
|-------------------------------|---------|----------------|-----------------------------------------------------------------------------------------|---------------|---------------|---------|-----|--------|-------------------------------|-------------------------------------|--------|-------|-------|--------------------|-------------|---------|-----------------------------------------------|-----------|---------|---------|---------------|---------|
| KX110354_1_1349               | 93063   | KX110354       | Sphingomonas aquatilis strain MPR 1.16S ribosomal RNA gene, partial sequence            | 25-Jun-16     | 4-Jan-18      | 1       |     |        |                               | Sphingomonas aquatilis              | 1349   | 0     |       | MPR 1              | genomic DNA |         | rhizosphere of <i>Convolvulus pluriaculis</i> | 1         | 1349    | FALSE   | ncbi_filtered | 93063   |
| NR_024997_1_1442              | 93063   | NR_024997      | Sphingomonas aquatilis strain ISS-7 16S ribosomal RNA gene, partial sequence            | 3-Feb-15      | 4-Jan-18      | 1       |     |        | RefSeq                        | Sphingomonas aquatilis              | 1442   | 0     |       | ISS-7_KCTC 2881    | rRNA        |         |                                               | 1         | 1442    | TRUE    | ncbi_filtered | 93063   |
| JF459968_1_1348               | 93065   | JF459968       | Sphingopyxis taijensensis strain WZBP1 16S ribosomal RNA gene, partial sequence         | 12-Mar-13     | 4-Jan-18      | 1       |     |        |                               | Sphingopyxis taijensensis           | 1348   | 0     |       | WZBP1              | genomic DNA |         | water treatment plant - raw water             | 1         | 1348    | FALSE   | ncbi_filtered | 93065   |
| JF459984_1_1369               | 93065   | JF459984       | Sphingopyxis taijensensis strain T11CP10 16S ribosomal RNA gene, partial sequence       | 12-Mar-13     | 4-Jan-18      | 1       |     |        |                               | Sphingopyxis taijensensis           | 1369   | 0     |       | T11CP10            | genomic DNA |         | tap water                                     | 1         | 1369    | FALSE   | ncbi_filtered | 93065   |
| KX682020_1_1422               | 93065   | KX682020       | Sphingopyxis taijensensis strain GM-B9 16S ribosomal RNA gene, partial sequence         | 31-Oct-16     | 4-Jan-18      | 1       |     |        |                               | Sphingopyxis taijensensis           | 1422   | 0     |       | GM-B9              | genomic DNA |         | soil                                          | 1         | 1422    | FALSE   | ncbi_filtered | 93065   |
| KX682024_1_1425               | 93065   | KX682024       | Sphingopyxis taijensensis strain YS-H2 16S ribosomal RNA gene, partial sequence         | 31-Oct-16     | 4-Jan-18      | 1       |     |        |                               | Sphingopyxis taijensensis           | 1425   | 0     |       | YS-H2              | genomic DNA |         | soil                                          | 1         | 1425    | FALSE   | ncbi_filtered | 93065   |
| NR_024999_1_1443              | 93065   | NR_024999      | Sphingopyxis taijensensis strain JSS-54 16S ribosomal RNA gene, partial sequence        | 3-Feb-15      | 4-Jan-18      | 1       |     |        | RefSeq                        | Sphingopyxis taijensensis           | 1443   | 0     |       | JSS-54_KCTC 2884   | rRNA        |         |                                               | 1         | 1443    | TRUE    | ncbi_filtered | 93065   |
| KX258224_1_1364               | 93222   | KX258224       | Pandoraea sputorum strain HPO020 16S ribosomal RNA gene, partial sequence               | 22-Jan-17     | 4-Jan-18      | 1       |     |        |                               | Pandoraea sputorum                  | 1364   | 0     |       | HPO020             | genomic DNA |         | sputum                                        | 1         | 1364    | FALSE   | ncbi_filtered | 93222   |
| MF289224_1_1241               | 93222   | MF289224       | Pandoraea sputorum strain BPM32 16S ribosomal RNA gene, partial sequence                | 1-Jan-18      | 4-Jan-18      | 1       |     |        |                               | Pandoraea sputorum                  | 1241   | 0     |       | BPM32              | genomic DNA |         | Oil-contaminated Rail ties                    | 1         | 1241    | FALSE   | ncbi_filtered | 93222   |
| MF289228_1_1241               | 93222   | MF289228       | Pandoraea sputorum strain BFM38 16S ribosomal RNA gene, partial sequence                | 1-Jan-18      | 4-Jan-18      | 1       |     |        |                               | Pandoraea sputorum                  | 1264   | 0     |       | BFM38              | genomic DNA |         | Oil-contaminated Rail ties                    | 1         | 1264    | FALSE   | ncbi_filtered | 93222   |
| MG322027_1_1369               | 93222   | MG322027       | Pandoraea sputorum strain FSB_FMB 16S ribosomal RNA gene, partial sequence              | 5-Nov-17      | 4-Jan-18      | 1       |     |        |                               | Pandoraea sputorum                  | 1339   | 0     |       | FSB_FMB            | genomic DNA |         |                                               | 1         | 1339    | FALSE   | ncbi_filtered | 93222   |
| NZ_CP010431_4328972_4330509   | 93222   | NZ_CP010431    | Pandoraea sputorum strain DSM 21091, complete genome                                    | 17-Apr-17     | 4-Jan-18      | 2       |     |        | RefSeq                        | Pandoraea sputorum                  | 1538   | 0     |       | DSM 21091          | genomic DNA |         | cystic fibrosis patient sputum                | 4328972   | 4330509 | TRUE    | ncbi_filtered | 93222   |
| JX010989_1_1438               | 95485   | JX010989       | Burkholderia stabilis strain C8 16S ribosomal RNA gene, partial sequence                | 25-Jul-12     | 4-Jan-18      | 1       |     |        |                               | Burkholderia stabilis               | 1438   | 0     |       | C8                 | genomic DNA |         | biotope mineral and soil                      | 1         | 1438    | FALSE   | ncbi_filtered | 95485   |
| JX010996_1_1441               | 95485   | JX010996       | Burkholderia stabilis strain C35 16S ribosomal RNA gene, partial sequence               | 25-Jul-12     | 4-Jan-18      | 1       |     |        |                               | Burkholderia stabilis               | 1441   | 0     |       | C35                | genomic DNA |         | biotope mineral and soil                      | 1         | 1441    | FALSE   | ncbi_filtered | 95485   |
| KF47830_1_1425                | 95485   | KF47830        | Burkholderia stabilis strain IHB B 1062 16S ribosomal RNA gene, partial sequence        | 14-Aug-13     | 4-Jan-18      | 1       |     |        |                               | Burkholderia stabilis               | 1425   | 0     |       | IHB B 1062         | genomic DNA |         | tea rhizosphere                               | 1         | 1425    | FALSE   | ncbi_filtered | 95485   |
| KF836499_1_1397               | 95485   | KF836499       | Burkholderia stabilis strain SPP-21 16S ribosomal RNA gene, partial sequence            | 8-Feb-14      | 4-Jan-18      | 1       |     |        |                               | Burkholderia stabilis               | 1397   | 0     |       | SPP-21             | genomic DNA |         | soil                                          | 1         | 1397    | FALSE   | ncbi_filtered | 95485   |
| KV757579_1_1414               | 95485   | KV757579       | Burkholderia stabilis strain Bb_TC7 16S ribosomal RNA gene, partial sequence            | 18-Jul-17     | 4-Jan-18      | 1       |     |        |                               | Burkholderia stabilis               | 1414   | 0     |       | Bb_TC7             | genomic DNA |         |                                               | 1         | 1414    | FALSE   | ncbi_filtered | 95485   |
| KF361510_1_1293               | 95486   | KF361510       | Burkholderia cenocepacia strain YR1_007 16S ribosomal RNA gene, partial sequence        | 13-Aug-13     | 4-Jan-18      | 1       |     |        |                               | Burkholderia cenocepacia            | 1293   | 0     |       | YR1_007            | genomic DNA |         | Arachis hypogaea rhizosphere                  | 1         | 1293    | FALSE   | ncbi_filtered | 95486   |
| KU258293_1_1392               | 95486   | KU258293       | Burkholderia cenocepacia strain DG11 16S ribosomal RNA gene, partial sequence           | 12-Mar-16     | 4-Jan-18      | 1       |     |        |                               | Burkholderia cenocepacia            | 1392   | 0     |       | DG11               | genomic DNA |         | lithic environment                            | 1         | 1392    | FALSE   | ncbi_filtered | 95486   |
| LT158018_1_1472               | 95486   | LT158018       | Burkholderia cenocepacia partial 16S rRNA gene, MLST sequence type ST856, isolate BCC90 | 7-Mar-16      | 4-Jan-18      | 1       |     |        |                               | Burkholderia cenocepacia            | 1472   | 0     |       |                    | genomic DNA | BCC90   |                                               | 1         | 1472    | FALSE   | ncbi_filtered | 95486   |
| NC_008060_1786325_1787861     | 331271  | NC_008060      | Burkholderia cenocepacia AU 1054 chromosome 1, complete sequence                        | 18-May-17     | 4-Jan-18      | 1       |     |        | RefSeq                        | Burkholderia cenocepacia AU 1054    | 1537   | 0     |       | AU 1054            | genomic DNA |         |                                               | 1786325   | 1787861 | FALSE   | ncbi_filtered | 95486   |
| NZ_MUROI00009_2917014_2918498 | 95486   | NZ_MUROI00009  | Burkholderia cenocepacia strain VCS486                                                  | 10-Apr-17     | 4-Jan-18      | 1       |     |        | WGS,RefSeq                    | Burkholderia cenocepacia            | 1485   | 0     |       | VCS486             | genomic DNA |         | sputum                                        | 2917014   | 2918498 | FALSE   | ncbi_filtered | 95486   |
| KF72882_1_1318                | 98513   | KF72882        | VCS486_contig63, whole genome shotgun sequence                                          | 2-Jul-13      | 4-Jan-18      | 1       |     |        |                               | Phenylobacterium haematophilum      | 1318   | 0     |       | BG817              | genomic DNA |         | soil                                          | 1         | 1318    | FALSE   | ncbi_filtered | 98513   |
| NR_041991_1_1436              | 98513   | NR_041991      | Phenylobacterium haematophilum strain BG817 16S ribosomal RNA gene, partial sequence    | 3-Feb-15      | 4-Jan-18      | 1       |     |        | RefSeq                        | Phenylobacterium haematophilum      | 1436   | 0     |       |                    | rRNA        |         |                                               | 1         | 1436    | TRUE    | ncbi_filtered | 98513   |
| EU086786_1_1483               | 98671   | EU086786       | Phenylobacterium haematophilum strain 1366 16S ribosomal RNA gene, partial sequence     | 4-Nov-13      | 4-Jan-18      | 1       |     |        |                               | Pseudoglutamicibacter albus         | 1483   | 0     |       | 1366               | genomic DNA |         |                                               | 1         | 1483    | FALSE   | ncbi_filtered | 98671   |
| EU086816_1_1472               | 98671   | EU086816       | Phenylobacterium haematophilum strain 99-0063 16S ribosomal RNA gene, partial sequence  | 4-Nov-13      | 4-Jan-18      | 1       |     |        |                               | Pseudoglutamicibacter albus         | 1472   | 0     |       | 99-0063            | genomic DNA |         |                                               | 1         | 1472    | FALSE   | ncbi_filtered | 98671   |
| NR_025361_1_1501              | 98671   | NR_025361      | Phenylobacterium haematophilum strain CF-43 16S ribosomal RNA gene, partial sequence    | 3-Feb-15      | 4-Jan-18      | 1       |     |        | RefSeq                        | Pseudoglutamicibacter albus         | 1501   | 0     |       | CF-43_DSM 13068    | rRNA        |         |                                               | 1         | 1501    | TRUE    | ncbi_filtered | 98671   |
| NZ_RHNO1000005_3566_5107      | 1401063 | NZ_RHNO1000005 | Pseudoglutamicibacter albus strain UMB0722                                              | 17-Apr-17     | 4-Jan-18      | 1       |     |        | WGS,HIGH_QUALITY_DRAFT,RefSeq | Pseudoglutamicibacter albus DN00011 | 1542   | 1     |       | DN00011            | genomic DNA |         | vagina                                        | 3566      | 5107    | FALSE   | ncbi_filtered | 98671   |
| PKG01000010_83394_84932       | 98671   | PKG01000010    | Pseudoglutamicibacter albus strain UMB0722                                              | 28-Dec-17     | 4-Jan-18      | 1       |     |        | WGS                           | Pseudoglutamicibacter albus         | 1539   | 0     |       | UMB0722            | genomic DNA |         |                                               | 83394     | 84932   | FALSE   | ncbi_filtered | 98671   |
| EU410078_1_1482               | 99655   | EU410078       | Rhodospseudomonas faecalis strain RLD-53 16S ribosomal RNA gene, complete sequence      | 18-Nov-09     | 4-Jan-18      | 1       |     |        |                               | Rhodospseudomonas faecalis          | 1482   | 0     |       | RLD-53             | genomic DNA |         |                                               | 1         | 1482    | FALSE   | ncbi_filtered | 99655   |
| GU562623_1_1377               | 99655   | GU562623       | Rhodospseudomonas faecalis strain D15 16S ribosomal RNA gene, partial sequence          | 16-Mar-10     | 4-Jan-18      | 1       |     |        |                               | Rhodospseudomonas faecalis          | 1477   | 0     |       | D15                | genomic DNA |         | rice paddy                                    | 1         | 1377    | FALSE   | ncbi_filtered | 99655   |
| JX448375_1_1412               | 99655   | JX448375       | Rhodospseudomonas faecalis strain D15 16S ribosomal RNA gene, partial sequence          | 15-Aug-12     | 4-Jan-18      | 1       |     |        |                               | Rhodospseudomonas faecalis          | 1412   | 0     |       | D15                | genomic DNA |         |                                               | 1         | 1412    | FALSE   | ncbi_filtered | 99655   |
| KX082829_1_1325               | 99655   | KX082829       | Rhodospseudomonas faecalis strain SR-04 16S ribosomal RNA gene, partial sequence        | 25-May-16     | 4-Jan-18      | 1       |     |        |                               | Rhodospseudomonas faecalis          | 1325   | 0     |       | SR-04              | genomic DNA |         | root                                          | 1         | 1325    | FALSE   | ncbi_filtered | 99655   |
| LC066638_1_1382               | 99655   | LC066638       | Rhodospseudomonas faecalis strain CYP08 16S ribosomal RNA, partial sequence             | 6-Jan-17      | 4-Jan-18      | 1       |     |        |                               | Rhodospseudomonas faecalis          | 1382   | 0     |       |                    | genomic DNA |         | swine sewage wastewater                       | 1         | 1382    | FALSE   | ncbi_filtered | 99655   |
| EU911931_1_1515               | 99807   | EU911931       | Corynebacterium auriscanis strain CYP08 16S ribosomal RNA gene, partial sequence        | 27-Jun-11     | 4-Jan-18      | 2       |     |        |                               | Corynebacterium auriscanis          | 1515   | 0     |       | CYP08              | genomic DNA |         |                                               | 1         | 1515    | FALSE   | ncbi_filtered | 99807   |
| NZ_JRVI0000003_22429_23955    | 99807   | NZ_JRVI0000003 | Corynebacterium auriscanis strain CIP 106629                                            | 17-Apr-17     | 4-Jan-18      | 1       |     |        | WGS,RefSeq                    | Corynebacterium auriscanis          | 1527   | 0     |       | CIP 106629         | genomic DNA |         | clinical specimen from dog ear                | 22429     | 23955   | TRUE    | ncbi_filtered | 99807   |
| YJ1377_1_1397                 | 99807   | YJ1377         | Corynebacterium auriscanis 16S rRNA gene                                                | 5-Nov-99      | 4-Jan-18      | 2       |     |        |                               | Corynebacterium auriscanis          | 1397   | 1     |       | M135/96/2          | genomic DNA |         |                                               | 1         | 1397    | FALSE   | ncbi_filtered | 99807   |
| AB030222_1_1486               | 100886  | AB030222       | Catenibacterium mitsuokai strain JCM 10607                                              | 25-Aug-00     | 4-Jan-18      | 1       |     |        |                               | Catenibacterium mitsuokai           | 1486   | 0     |       | JCM 10607          | genomic DNA |         |                                               | 1         | 1486    | FALSE   | ncbi_filtered | 100886  |
| AB030223_1_1490               | 100886  | AB030223       | Catenibacterium mitsuokai strain JCM 10608                                              | 25-Aug-00     | 4-Jan-18      | 1       |     |        |                               | Catenibacterium mitsuokai           | 1490   | 0     |       | JCM 10608          | genomic DNA |         |                                               | 1         | 1490    | FALSE   | ncbi_filtered | 100886  |
| AB030226_1_1486               | 100886  | AB030226       | Catenibacterium mitsuokai strain JCM 10611                                              | 25-Aug-00     | 4-Jan-18      | 1       |     |        |                               | Catenibacterium mitsuokai           | 1486   | 0     |       | JCM 10611          | genomic DNA |         |                                               | 1         | 1486    | FALSE   | ncbi_filtered | 100886  |
| AB643465_1_1491               | 100886  | AB643465       | Catenibacterium mitsuokai strain JCM 10606                                              | 9-Nov-12      | 4-Jan-18      | 1       |     |        |                               | Catenibacterium mitsuokai           | 1491   | 0     |       | JCM 10606          | genomic DNA |         |                                               | 1         | 1491    | FALSE   | ncbi_filtered | 100886  |
| NZ_CBZ01000019_6127_6274      | 100886  | NZ_CBZ01000019 | Catenibacterium mitsuokai strain 27895TDY508825, whole genome shotgun sequence          | 15-Nov-17     | 4-Jan-18      | 1       |     |        | WGS,RefSeq                    | Catenibacterium mitsuokai           | 1528   | 0     |       | 27895TDY508825     | genomic DNA |         | faeces                                        | 61247     | 62774   | FALSE   | ncbi_filtered | 100886  |
| AM238669_1_1471               | 102148  | AM238669       | Solobacterium moorei strain N407 0592                                                   | 9-Apr-06      | 4-Jan-18      | 1       |     |        |                               | Solobacterium moorei                | 1471   | 0     |       | N407 0592          | genomic DNA |         | human blood                                   | 1         | 1471    | FALSE   | ncbi_filtered | 102148  |
| GU422964_1_1453               | 102148  | GU422964       | Solobacterium moorei clone_K010 16S ribosomal RNA gene, partial sequence                | 22-Sep-10     | 4-Jan-18      | 1       |     |        |                               | Solobacterium moorei                | 1453   | 0     |       |                    | genomic DNA |         | oral cavity                                   | 1         | 1453    | FALSE   | ncbi_filtered | 102148  |
| KX683895_1_1389               | 102148  | KX683895       | Solobacterium moorei strain CCUG 46647 16S ribosomal RNA gene, partial sequence         | 1-Sep-17      | 4-Jan-18      | 1       |     |        |                               | Solobacterium moorei                | 1399   | 0     |       | CCUG 46647         | genomic DNA |         | Human gland (throat, 3-year-old boy)          | 1         | 1399    | FALSE   | ncbi_filtered | 102148  |
| NR_036882_1_1487              | 102148  | NR_036882      | Solobacterium moorei strain RCAS9-74 16S ribosomal RNA gene, partial sequence           | 3-Feb-15      | 4-Jan-18      | 1       |     |        | RefSeq                        | Solobacterium moorei                | 1487   | 0     |       | RCAS9-74_JCM 10645 | rRNA        |         |                                               | 1         | 1487    | TRUE    | ncbi_filtered | 102148  |
| NZ_GL637672_3358_4890         | 706433  | NZ_GL637672    | Solobacterium moorei strain F0204 Sefid158, whole genome shotgun sequence               | 15-Jun-17     | 4-Jan-18      | 1       |     |        | WGS,HIGH_QUALITY_DRAFT,RefSeq | Solobacterium moorei F0204          | 1533   | 0     |       | F0204              | genomic DNA |         | biological product (ENV0.02000043)            | 3358      | 4890    | FALSE   | ncbi_filtered | 102148  |
| AJ243889_1_1440               | 103621  | AJ243889       | Actinomyces urogenitalis strain CCG 38702 16S ribosomal RNA gene, partial sequence      | 6-Jun-03      | 4-Jan-18      | 1       |     |        |                               | Actinomyces urogenitalis            | 1440   | 0     |       |                    | genomic DNA |         |                                               | 1         | 1440    | FALSE   | ncbi_filtered | 103621  |
| NR_025364_1_1423              | 103621  | NR_025364      | Actinomyces urogenitalis strain CCG 38702 16S ribosomal RNA gene, partial sequence      | 3-Feb-15      | 4-Jan-18      | 1       |     |        |                               | Actinomyces urogenitalis            | 1423   | 0     |       | CCUG 38702         | rRNA        |         |                                               | 1         | 1423    | TRUE    | ncbi_filtered | 103621  |
| NZ_D599580_230_1780           | 525246  | NZ_D599580     | Actinomyces urogenitalis strain DSM 15434, whole genome shotgun sequence                | 7-Apr-17      | 4-Jan-18      | 1       |     |        | WGS,RefSeq                    | Actinomyces urogenitalis DSM 15434  | 1551   | 0     |       | DSM 15434          | genomic DNA |         | biological product (ENV0.02000043)            | 230       | 1780    | TRUE    | ncbi_filtered | 103621  |
| PKH01000020_234_1780          | 103621  | PKH01000020    |                                                                                         |               |               |         |     |        |                               |                                     |        |       |       |                    |             |         |                                               |           |         |         |               |         |

| seqname                     | tax_id  | accession       | description                                                                                               | modified_date | download_date | version_num | source                                        | keywords                          | organism                                      | length | ambig_count | strain                    | mol_type    | isolate | isolation_source                   | seq_start | seq_stop | is_type | collection    | species |
|-----------------------------|---------|-----------------|-----------------------------------------------------------------------------------------------------------|---------------|---------------|-------------|-----------------------------------------------|-----------------------------------|-----------------------------------------------|--------|-------------|---------------------------|-------------|---------|------------------------------------|-----------|----------|---------|---------------|---------|
| FR80879_1_1421              | 10654   | FR80879         | Acinetobacter genomosp. 13TU strain BL Ac12 16S ribosomal RNA gene, partial sequence                      | 8-Nov-10      | 4-Jan-18      | 1           | Acinetobacter nosocomialis                    |                                   | Acinetobacter nosocomialis                    | 1421   | 0           | BL Ac12                   | genomic DNA |         |                                    | 1         | 1421     | FALSE   | ncbi_filtered | 10654   |
| HQ180187_1_1391             | 10654   | HQ180187        | Acinetobacter nosocomialis strain LMG 993 16S ribosomal RNA gene, partial sequence                        | 15-Oct-14     | 4-Jan-18      | 1           | Acinetobacter nosocomialis                    |                                   | Acinetobacter nosocomialis                    | 1391   | 0           | LMG 993                   | genomic DNA |         |                                    | 1         | 1391     | FALSE   | ncbi_filtered | 10654   |
| MF943157_1_1524             | 10654   | MF943157        | Acinetobacter nosocomialis strain FE5 16S ribosomal RNA gene, partial sequence                            | 16-Oct-17     | 4-Jan-18      | 1           | Acinetobacter nosocomialis                    |                                   | Acinetobacter nosocomialis                    | 1524   | 1           | FE5                       | genomic DNA |         | E-waste                            | 1         | 1524     | FALSE   | ncbi_filtered | 10654   |
| NZ_APCD01000123_173_1717    | 1265584 | NZ_APCD01000123 | Acinetobacter nosocomialis P020 contig_101_1, whole genome shotgun sequence                               | 7-Jun-17      | 4-Jan-18      | 1           | Acinetobacter nosocomialis P020               | WGS,RefSeq                        | Acinetobacter nosocomialis P020               | 1545   | 0           | P020                      | genomic DNA |         |                                    | 173       | 1717     | FALSE   | ncbi_filtered | 10654   |
| NZ_H930451_1415729_1417273  | 1183155 | NZ_H930451      | Acinetobacter nosocomialis Ab22222 supercont1.9, whole genome shotgun sequence                            | 30-Mar-17     | 4-Jan-18      | 1           | Acinetobacter nosocomialis Ab22222            | WGS,RefSeq                        | Acinetobacter nosocomialis Ab22222            | 1545   | 0           | Ab22222                   | genomic DNA |         |                                    | 1415729   | 1417273  | FALSE   | ncbi_filtered | 10654   |
| HQ220061_1_1432             | 107400  | HQ220061        | Methylobacterium fujiawense strain SNA3 16S ribosomal RNA gene, partial sequence                          | 26-Oct-11     | 4-Jan-18      | 1           | Methylobacterium fujiawense                   |                                   | Methylobacterium fujiawense                   | 1432   | 0           | SNA3                      | genomic DNA |         | roots                              | 1         | 1432     | FALSE   | ncbi_filtered | 107400  |
| HQ220126_1_1431             | 107400  | HQ220126        | Methylobacterium fujiawense strain STY4 16S ribosomal RNA gene, partial sequence                          | 26-Oct-11     | 4-Jan-18      | 1           | Methylobacterium fujiawense                   |                                   | Methylobacterium fujiawense                   | 1431   | 1           | STY4                      | genomic DNA |         | roots                              | 1         | 1431     | FALSE   | ncbi_filtered | 107400  |
| HQ220127_1_1438             | 107400  | HQ220127        | Methylobacterium fujiawense strain STY5 16S ribosomal RNA gene, partial sequence                          | 26-Oct-11     | 4-Jan-18      | 1           | Methylobacterium fujiawense                   |                                   | Methylobacterium fujiawense                   | 1438   | 0           | STY5                      | genomic DNA |         | roots                              | 1         | 1438     | FALSE   | ncbi_filtered | 107400  |
| K8708844_1_1398             | 107400  | K8708844        | Methylobacterium fujiawense strain 79J-21 16S ribosomal RNA gene, partial sequence                        | 31-Dec-16     | 4-Jan-18      | 1           | Methylobacterium fujiawense                   |                                   | Methylobacterium fujiawense                   | 1398   | 0           | 79J-21                    | genomic DNA |         | mulberry                           | 1         | 1398     | FALSE   | ncbi_filtered | 107400  |
| LC026002_1_1425             | 107400  | LC026002        | Methylobacterium fujiawense gene for 16S ribosomal RNA, partial sequence, strain: RMS                     | 6-Feb-15      | 4-Jan-18      | 1           | Methylobacterium fujiawense                   |                                   | Methylobacterium fujiawense                   | 1425   | 0           | RMS                       | genomic DNA |         | seeds of rice                      | 1         | 1425     | FALSE   | ncbi_filtered | 107400  |
| HQ857761_1_1442             | 108980  | HQ857761        | Acinetobacter ursingii strain BISS5 16S ribosomal RNA gene, partial sequence                              | 20-Jul-11     | 4-Jan-18      | 1           | Acinetobacter ursingii                        |                                   | Acinetobacter ursingii                        | 1442   | 0           | BISS5                     | genomic DNA |         | soil                               | 1         | 1442     | FALSE   | ncbi_filtered | 108980  |
| KJ585679_1_1441             | 108980  | KJ585679        | Acinetobacter ursingii strain VTM2R94 16S ribosomal RNA gene, partial sequence                            | 10-Jun-14     | 4-Jan-18      | 1           | Acinetobacter ursingii                        |                                   | Acinetobacter ursingii                        | 1431   | 0           | VTM2R94                   | genomic DNA |         | rumen                              | 1         | 1431     | FALSE   | ncbi_filtered | 108980  |
| NZ_AIEA01000080_434_1977    | 981336  | NZ_AIEA01000080 | Acinetobacter ursingii DSM 16037 = CIP 107286 strain DSM 16037 contig_0080, whole genome shotgun sequence | 10-Apr-17     | 4-Jan-18      | 1           | Acinetobacter ursingii DSM 16037 = CIP 107286 | WGS,RefSeq                        | Acinetobacter ursingii DSM 16037 = CIP 107286 | 1544   | 0           | DSM 16037                 | genomic DNA |         | blood of female with endocarditis  | 434       | 1977     | TRUE    | ncbi_filtered | 108980  |
| NZ_KB849721_159971_161514   | 1257043 | NZ_KB849721     | Acinetobacter ursingii ANC 3649 acru-supercont1.2, whole genome shotgun sequence                          | 1-Apr-17      | 4-Jan-18      | 1           | Acinetobacter ursingii ANC 3649               | WGS,RefSeq                        | Acinetobacter ursingii ANC 3649               | 1544   | 0           | ANC 3649                  | genomic DNA |         | Blood                              | 159971    | 161514   | FALSE   | ncbi_filtered | 108980  |
| NZ_KB849722_1140068_1141613 | 1257043 | NZ_KB849722     | Acinetobacter ursingii ANC 3649 acru-supercont1.3, whole genome shotgun sequence                          | 1-Apr-17      | 4-Jan-18      | 1           | Acinetobacter ursingii ANC 3649               | WGS,RefSeq                        | Acinetobacter ursingii ANC 3649               | 1546   | 0           | ANC 3649                  | genomic DNA |         | Blood                              | 1140068   | 1141613  | FALSE   | ncbi_filtered | 108980  |
| FR80881_1_1401              | 108981  | FR80881         | Acinetobacter schindleri strain BL Acso72 16S ribosomal RNA gene, partial sequence                        | 8-Nov-10      | 4-Jan-18      | 1           | Acinetobacter schindleri                      |                                   | Acinetobacter schindleri                      | 1401   | 0           | BL Acso72                 | genomic DNA |         |                                    | 1         | 1401     | FALSE   | ncbi_filtered | 108981  |
| K7261413_1_1461             | 108981  | K7261413        | Acinetobacter schindleri strain S7 16S ribosomal RNA gene, partial sequence                               | 12-Aug-15     | 4-Jan-18      | 1           | Acinetobacter schindleri                      |                                   | Acinetobacter schindleri                      | 1461   | 0           | S7                        | genomic DNA |         |                                    | 1         | 1461     | FALSE   | ncbi_filtered | 108981  |
| KY393041_1_1415             | 108981  | KY393041        | Acinetobacter schindleri strain MCDAD4 16S ribosomal RNA gene, partial sequence                           | 31-Dec-16     | 4-Jan-18      | 1           | Acinetobacter schindleri                      |                                   | Acinetobacter schindleri                      | 1415   | 0           | MCDAD4                    | genomic DNA |         | marine mud                         | 1         | 1415     | FALSE   | ncbi_filtered | 108981  |
| MG551527_1_1420             | 108981  | MG551527        | Acinetobacter schindleri strain XJ-10 16S ribosomal RNA gene, partial sequence                            | 26-Nov-17     | 4-Jan-18      | 1           | Acinetobacter schindleri                      |                                   | Acinetobacter schindleri                      | 1420   | 1           | XJ-10                     | genomic DNA |         | soil from Xinjiang Province        | 1         | 1420     | FALSE   | ncbi_filtered | 108981  |
| NZ_CP015615_24547_26091     | 108981  | NZ_CP015615     | Acinetobacter schindleri strain ACE, complete genome                                                      | 22-Oct-17     | 4-Jan-18      | 1           | Acinetobacter schindleri                      | RefSeq                            | Acinetobacter schindleri                      | 1545   | 0           | ACE                       | genomic DNA |         |                                    | 24547     | 26091    | FALSE   | ncbi_filtered | 108981  |
| AY029801_1_1485             | 109328  | AY029801        | Leptotrichia trevisanii strain LB11 16S ribosomal RNA gene, partial sequence                              | 23-Apr-08     | 4-Jan-18      | 1           | Leptotrichia trevisanii                       |                                   | Leptotrichia trevisanii                       | 1485   | 2           | LB11                      | genomic DNA |         |                                    | 1         | 1485     | FALSE   | ncbi_filtered | 109328  |
| AY029805_1_1485             | 109328  | AY029805        | Leptotrichia trevisanii strain LB06 16S ribosomal RNA gene, partial sequence                              | 23-Apr-08     | 4-Jan-18      | 1           | Leptotrichia trevisanii                       |                                   | Leptotrichia trevisanii                       | 1485   | 1           | LB06                      | genomic DNA |         |                                    | 1         | 1485     | FALSE   | ncbi_filtered | 109328  |
| GU561360_1_1398             | 109328  | GU561360        | Leptotrichia trevisanii strain T69 16S ribosomal RNA gene, partial sequence                               | 13-Mar-10     | 4-Jan-18      | 1           | Leptotrichia trevisanii                       |                                   | Leptotrichia trevisanii                       | 1398   | 0           | T69                       | genomic DNA |         | oral cavity                        | 1         | 1398     | FALSE   | ncbi_filtered | 109328  |
| NR_028769_1_1461            | 109328  | NR_028769       | Leptotrichia trevisanii strain 'WeeTe' 1999 16S ribosomal RNA gene, partial sequence                      | 3-Feb-15      | 4-Jan-18      | 1           | Leptotrichia trevisanii                       | RefSeq                            | Leptotrichia trevisanii                       | 1461   | 1           | 'WeeTe' 1999; ATCC 709097 | rRNA        |         |                                    | 1         | 1461     | TRUE    | ncbi_filtered | 109328  |
| AF243155_1_1511             | 109790  | AF243155        | Lactobacillus jensenii strain KC23 16S ribosomal RNA gene, partial sequence                               | 7-Aug-02      | 4-Jan-18      | 1           | Lactobacillus jensenii                        |                                   | Lactobacillus jensenii                        | 1511   | 0           | KC23                      | genomic DNA |         |                                    | 1         | 1511     | FALSE   | ncbi_filtered | 109790  |
| AF243159_1_1511             | 109790  | AF243159        | Lactobacillus jensenii strain KC36b 16S ribosomal RNA gene, partial sequence                              | 7-Aug-02      | 4-Jan-18      | 1           | Lactobacillus jensenii                        |                                   | Lactobacillus jensenii                        | 1511   | 0           | KC36b                     | genomic DNA |         |                                    | 1         | 1511     | FALSE   | ncbi_filtered | 109790  |
| NZ_AYU01000057_88_1658      | 1437662 | NZ_AYU01000057  | Lactobacillus jensenii DSM 20557 Scaffold57, whole genome shotgun sequence                                | 4-Apr-17      | 4-Jan-18      | 1           | Lactobacillus jensenii DSM 20557              | WGS,RefSeq                        | Lactobacillus jensenii DSM 20557              | 1571   | 0           | DSM 20557                 | genomic DNA |         | vaginal discharge                  | 88        | 1658     | TRUE    | ncbi_filtered | 109790  |
| NZ_AZRC01000054_96_1666     | 1434655 | NZ_AZRC01000054 | Lactobacillus jensenii IM59 contig_54, whole genome shotgun sequence                                      | 3-Apr-17      | 4-Jan-18      | 1           | Lactobacillus jensenii IM59                   | WGS,RefSeq                        | Lactobacillus jensenii IM59                   | 1571   | 0           | IM59                      | genomic DNA |         |                                    | 96        | 1666     | FALSE   | ncbi_filtered | 109790  |
| NZ_CM009953_591292_592869   | 525329  | NZ_CM009953     | Lactobacillus jensenii JV-V16 chromosome, whole genome shotgun sequence                                   | 30-Mar-17     | 4-Jan-18      | 1           | Lactobacillus jensenii JV-V16                 | WGS,NONCONTIGUOUS_FINISHED,RefSeq | Lactobacillus jensenii JV-V16                 | 1571   | 0           | JV-V16                    | genomic DNA |         | biological product [ENVO:02000043] | 591292    | 592869   | FALSE   | ncbi_filtered | 109790  |
| FR823144_1_1455             | 113107  | FR823144        | Streptococcus australis strain ToTD 16S ribosomal RNA gene, partial sequence                              | 6-Apr-09      | 4-Jan-18      | 1           | Streptococcus australis                       |                                   | Streptococcus australis                       | 1455   | 4           | ToTD                      | genomic DNA |         | oral cavity on tongue              | 1         | 1455     | FALSE   | ncbi_filtered | 113107  |
| KF933784_1_1452             | 113107  | KF933784        | Streptococcus australis strain CHDC B547 16S ribosomal RNA gene, partial sequence                         | 12-Jun-15     | 4-Jan-18      | 1           | Streptococcus australis                       |                                   | Streptococcus australis                       | 1513   | 0           | CHDC B547                 | genomic DNA |         | oral cavity                        | 1         | 1513     | FALSE   | ncbi_filtered | 113107  |
| KM225750_1_1393             | 113107  | KM225750        | Streptococcus australis strain C7 16S ribosomal RNA gene, partial sequence                                | 23-Oct-14     | 4-Jan-18      | 1           | Streptococcus australis                       |                                   | Streptococcus australis                       | 1492   | 0           | C7                        | genomic DNA |         | interproximal dental plaque        | 1         | 1492     | FALSE   | ncbi_filtered | 113107  |
| NR_114537_1_1337            | 888833  | NR_114537       | Streptococcus australis strain AT1 16S ribosomal RNA gene, partial sequence                               | 3-Feb-15      | 4-Jan-18      | 1           | Streptococcus australis ATCC 700641           | RefSeq                            | Streptococcus australis ATCC 700641           | 1337   | 2           | AT1; ATCC 700641          | rRNA        |         |                                    | 1         | 1337     | TRUE    | ncbi_filtered | 113107  |
| NZ_AFUD01000009_28014_29568 | 888833  | NZ_AFUD01000009 | Streptococcus australis ATCC 700641 ctg112991396274, whole genome shotgun sequence                        | 7-Apr-17      | 4-Jan-18      | 1           | Streptococcus australis ATCC 700641           | WGS,RefSeq                        | Streptococcus australis ATCC 700641           | 1555   | 0           | ATCC 700641               | genomic DNA |         |                                    | 28014     | 29568    | TRUE    | ncbi_filtered | 113107  |
| AJ277566_1_1455             | 113562  | AJ277566        | Actinoplanes derwentensis strain IFO 14935 16S ribosomal RNA gene, partial sequence                       | 7-Nov-03      | 4-Jan-18      | 1           | Actinoplanes derwentensis                     | 16S ribosomal RNA;16S rRNA gene   | Actinoplanes derwentensis                     | 1455   | 0           | IM59U 200277              | genomic DNA |         |                                    | 1         | 1455     | FALSE   | ncbi_filtered | 113562  |
| NR_024741_1_1473            | 113562  | NR_024741       | Actinoplanes derwentensis strain DSM 43941 genome assembly, chromosome I                                  | 3-Feb-15      | 4-Jan-18      | 1           | Actinoplanes derwentensis                     |                                   | Actinoplanes derwentensis                     | 1473   | 0           | IFO 14935                 | rRNA        |         |                                    | 1         | 1473     | TRUE    | ncbi_filtered | 113562  |
| NZ_1T629758_7338601_7340126 | 113562  | NZ_1T629758     | Actinoplanes derwentensis strain DSM 43941 genome assembly, chromosome I                                  | 29-Jul-17     | 4-Jan-18      | 1           | Actinoplanes derwentensis                     | RefSeq                            | Actinoplanes derwentensis                     | 1526   | 0           | DSM 43941                 | genomic DNA |         |                                    | 7338601   | 7340126  | TRUE    | ncbi_filtered | 113562  |
| NR_042016_1_1508            | 113570  | NR_042016       | Actinoplanes palleronii strain IMSNU 20038 16S ribosomal RNA, partial sequence                            | 24-Oct-17     | 4-Jan-18      | 1           | Actinoplanes palleronii                       | RefSeq                            | Actinoplanes palleronii                       | 1508   | 0           | IM59U 20038               | rRNA        |         |                                    | 1         | 1508     | TRUE    | ncbi_filtered | 113570  |
| NR_112103_1_1471            | 113570  | NR_112103       | Actinoplanes palleronii strain IFO 14916 16S ribosomal RNA, partial sequence                              | 24-Oct-17     | 4-Jan-18      | 1           | Actinoplanes palleronii                       | RefSeq                            | Actinoplanes palleronii                       | 1471   | 0           | IFO 14916                 | rRNA        |         |                                    | 1         | 1471     | TRUE    | ncbi_filtered | 113570  |
| JN713512_1_1475             | 114527  | JN713512        | Mogibacterium diversum canine oral taxon 348 clone 12082 16S ribosomal RNA gene, partial sequence         | 9-May-12      | 4-Jan-18      | 1           | Mogibacterium diversum                        | ENV                               | Mogibacterium diversum                        | 1475   | 0           |                           | genomic DNA |         | oral cavity subgingival plaque     | 1         | 1475     | FALSE   | ncbi_filtered | 114527  |
| NR_027191_1_1455            | 114527  | NR_027191       | Mogibacterium diversum strain HM-7 16S ribosomal RNA gene, partial sequence                               | 3-Feb-15      | 4-Jan-18      | 1           | Mogibacterium diversum                        | RefSeq;16S rRNA                   | Mogibacterium diversum                        | 1455   | 2           | HM-7; ATCC 709923         | rRNA        |         |                                    | 1         | 1455     | TRUE    | ncbi_filtered | 114527  |
| NZ_CP027228_1235607_1237126 | 114527  | NZ_CP027228     | Mogibacterium diversum strain CCGU 47132 chromosome, complete genome                                      | 16-Mar-18     | 19-Mar-18     | 1           | Mogibacterium diversum                        | RefSeq                            | Mogibacterium diversum                        | 1520   | 0           | CCGU 47132                | genomic DNA |         |                                    | 1235607   | 1237126  | TRUE    | ncbi_filtered | 114527  |
| LC096234_1_1455             | 114528  | LC096234        | Mogibacterium neglectum gene for 16S ribosomal RNA, partial sequence, strain: JCM 11204                   | 13-Nov-15     | 4-Jan-18      | 1           | Mogibacterium neglectum                       |                                   | Mogibacterium neglectum                       | 1455   | 0           | JCM 11204                 | genomic DNA |         |                                    | 1         | 1455     | TRUE    | ncbi_filtered | 114528  |
| NR_027203_1_1478            | 114528  | NR_027203       | Mogibacterium neglectum strain P9a-h 16S ribosomal RNA gene, partial sequence                             | 3-Feb-15      | 4-Jan-18      | 1           | Mogibacterium neglectum                       | RefSeq;16S rRNA                   | Mogibacterium neglectum                       | 1478   | 0           | P9a-h; ATCC 700924        | rRNA        |         |                                    | 1         | 1478     | TRUE    | ncbi_filtered | 114528  |
| AJ271894_1_1448             | 114702  | AJ271894        | Actinomyces lingnae 16S rRNA gene, strain CCGU 3286                                                       | 5-Feb-02      | 4-Jan-18      | 1           | Actinomyces lingnae                           | 16S ribosomal RNA;16S rRNA gene   | Actinomyces lingnae                           | 1448   | 1           | CCGU 3286S                | genomic DNA |         |                                    | 1         | 1448     | FALSE   | ncbi_filtered | 114702  |
| AB361624_1_1496             | 116085  | AB361624        | Coprococcus catus gene for 16S rRNA, partial sequence, strain: I8                                         | 20-Mar-08     | 4-Jan-18      | 1           | Coprococcus catus                             |                                   | Coprococcus catus                             | 1496   | 0           | I8                        | genomic DNA |         | Human feces                        | 1         | 1496     | FALSE   | ncbi_filtered | 116085  |
| EU266552_1_1440             | 117962  | EU266552        | Coprococcus catus strain GD/7 16S ribosomal RNA gene, partial sequence                                    | 1-Dec-08      | 4-Jan-18      | 1           | Coprococcus catus GD/7                        |                                   | Coprococcus catus GD/7                        | 1440   | 10          | GD/7                      | genomic DNA |         |                                    | 1         | 1440     | FALSE   | ncbi_filtered | 116085  |
| NR_024750_1_1315            | 116085  | NR_024750       | Coprococcus catus strain VPI-CE-61 16S ribosomal RNA gene, partial sequence                               | 3-Feb-15      | 4-Jan-18      | 1           | Coprococcus catus                             | RefSeq;16S rRNA                   | Coprococcus catus                             | 1315   | 3           | VPI-CE-61; ATCC 27761     | rRNA        |         |                                    | 1         | 1315     | TRUE    | ncbi_filtered | 116085  |
| AF233876_1_1443             | 117506  | AF233876        | Comamonas denitrificans strain 110 16S ribosomal RNA gene, partial sequence                               | 21-Jun-01     | 4-Jan-18      | 1           | Comamonas denitrificans                       |                                   | Comamonas denitrificans                       | 1443   | 0           | 110                       | genomic DNA |         |                                    | 1         | 1443     | FALSE   | ncbi_filtered | 117506  |
| DO836252_1_1520             | 117506  | DO836252        | Comamonas denitrificans strain 14 16S ribosomal RNA gene, partial sequence                                | 4-May-09</    |               |             |                                               |                                   |                                               |        |             |                           |             |         |                                    |           |          |         |               |         |

| seqname                     | tax_id  | accession      | description                                                                                             | modified_date | download_date | version_num | source                                              | keywords                        | organism                                    | length | ambig_count | strain               | mol_type    | isolate | isolation_source                                                                      | seq_start | seq_stop | is_type | collection    | species |
|-----------------------------|---------|----------------|---------------------------------------------------------------------------------------------------------|---------------|---------------|-------------|-----------------------------------------------------|---------------------------------|---------------------------------------------|--------|-------------|----------------------|-------------|---------|---------------------------------------------------------------------------------------|-----------|----------|---------|---------------|---------|
| NZ_CP014160_1490901_1492457 | 119206  | NZ_CP014160    | Aerococcus sanguinicola strain CCUG43001, complete genome                                               | 16-Apr-17     | 4-Jan-18      | 1           | Aerococcus sanguinicola                             | RefSeq                          | Aerococcus sanguinicola                     | 1557   | 0           | CCUG43001            | genomic DNA |         | Human blood                                                                           | 1490901   | 1492457  | TRUE    | ncbi_filtered | 119206  |
| NZ_CP014160_749932_751488   | 119206  | NZ_CP014160    | Aerococcus sanguinicola strain CCUG43001, complete genome                                               | 16-Apr-17     | 4-Jan-18      | 1           | Aerococcus sanguinicola                             | RefSeq                          | Aerococcus sanguinicola                     | 1557   | 0           | CCUG43001            | genomic DNA |         | Human blood                                                                           | 749932    | 751488   | TRUE    | ncbi_filtered | 119206  |
| NZ_CP014160_978767_980323   | 119206  | NZ_CP014160    | Aerococcus sanguinicola strain CCUG43001, complete genome                                               | 16-Apr-17     | 4-Jan-18      | 1           | Aerococcus sanguinicola                             | RefSeq                          | Aerococcus sanguinicola                     | 1557   | 0           | CCUG43001            | genomic DNA |         | Human blood                                                                           | 978767    | 980323   | TRUE    | ncbi_filtered | 119206  |
| CP026544_3438243_3439782    | 119219  | CP026544       | Cupriavidus metallidurans strain Ni-2 chromosome, complete genome                                       | 10-Feb-18     | 14-Feb-18     | 1           | Cupriavidus metallidurans (Ralstonia metallidurans) |                                 | Cupriavidus metallidurans                   | 1540   | 0           | Ni-2                 | genomic DNA |         | soil                                                                                  | 3438243   | 3439782  | FALSE   | ncbi_filtered | 119219  |
| FI644635_1_1365             | 119219  | FI644635       | Cupriavidus metallidurans strain XXXD-1 16S ribosomal RNA gene, partial sequence                        | 23-Feb-09     | 4-Jan-18      | 1           | Cupriavidus metallidurans (Ralstonia metallidurans) |                                 | Cupriavidus metallidurans                   | 1365   | 0           | XXXD-1               | genomic DNA |         | 475m deep mine lane in metal sulfide mine                                             | 1         | 1365     | FALSE   | ncbi_filtered | 119219  |
| JG659694_1_1440             | 119219  | JG659694       | Cupriavidus metallidurans strain RA-384 16S ribosomal RNA gene, partial sequence                        | 23-Dec-15     | 4-Jan-18      | 1           | Cupriavidus metallidurans (Ralstonia metallidurans) |                                 | Cupriavidus metallidurans                   | 1460   | 0           | RA-384               | genomic DNA |         | plant tissue                                                                          | 1         | 1460     | FALSE   | ncbi_filtered | 119219  |
| KI848522_1_1440             | 119219  | KI848522       | Cupriavidus metallidurans strain BT 157 16S ribosomal RNA gene, partial sequence                        | 30-Jun-14     | 4-Jan-18      | 1           | Cupriavidus metallidurans (Ralstonia metallidurans) |                                 | Cupriavidus metallidurans                   | 1440   | 0           | BT 157               | genomic DNA |         | gulf                                                                                  | 1         | 1440     | FALSE   | ncbi_filtered | 119219  |
| MGG64650_1_1437             | 119219  | MGG64650       | Cupriavidus metallidurans strain CR2 16S ribosomal RNA gene, partial sequence                           | 27-Jan-18     | 14-Feb-18     | 1           | Cupriavidus metallidurans (Ralstonia metallidurans) |                                 | Cupriavidus metallidurans                   | 1437   | 0           | CR2                  | genomic DNA |         | biofilter of a drinking water treatment plant                                         | 1         | 1437     | FALSE   | ncbi_filtered | 119219  |
| AJ276874_1_1420             | 119231  | AJ276874       | Campylobacter faecalis 16S rRNA gene, strain 1433                                                       | 6-Jun-03      | 4-Jan-18      | 1           | Campylobacter faecalis                              | 16S ribosomal RNA;16S rRNA gene | Campylobacter faecalis                      | 1420   | 2           | 1433                 | genomic DNA |         | stool sample isolate                                                                  | 1         | 1420     | FALSE   | ncbi_filtered | 119231  |
| AB041770_1_1407             | 122348  | AB041770       | Paracoccus kawasakiensis strain rsmm-01 16S ribosomal RNA gene, partial sequence                        | 13-Oct-01     | 4-Jan-18      | 1           | Paracoccus kawasakiensis                            |                                 | Paracoccus kawasakiensis                    | 1407   | 0           | AS-8                 | genomic DNA |         |                                                                                       | 1         | 1407     | FALSE   | ncbi_filtered | 122348  |
| JQ782899_1_1536             | 122355  | JQ782899       | Pseudomonas psychrophila strain rsmm-01 16S ribosomal RNA gene, partial sequence                        | 25-Apr-12     | 4-Jan-18      | 1           | Pseudomonas psychrophila                            |                                 | Pseudomonas psychrophila                    | 1536   | 0           | Amn-01               | genomic DNA |         | activated sludge of municipal wastewater treatment plant                              | 1         | 1536     | FALSE   | ncbi_filtered | 122355  |
| KC854926_1_1459             | 122355  | KC854926       | Pseudomonas psychrophila strain WF7 16S ribosomal RNA gene, partial sequence                            | 26-Aug-13     | 4-Jan-18      | 1           | Pseudomonas psychrophila                            | UNVERIFIED_ORGANISM             | Pseudomonas psychrophila                    | 1459   | 0           | WF7                  | genomic DNA |         | ginger foundation soil                                                                | 1         | 1459     | FALSE   | ncbi_filtered | 122355  |
| KR088583_1_1448             | 122355  | KR088583       | Pseudomonas psychrophila strain AB_52 16S ribosomal RNA gene, partial sequence                          | 30-Dec-15     | 4-Jan-18      | 1           | Pseudomonas psychrophila                            | UNVERIFIED                      | Pseudomonas psychrophila                    | 1448   | 0           | AB_52                | genomic DNA |         | groundwater                                                                           | 1         | 1448     | FALSE   | ncbi_filtered | 122355  |
| K7767880_1_1421             | 122355  | K7767880       | Pseudomonas psychrophila strain F33 16S ribosomal RNA gene, partial sequence                            | 29-Sep-15     | 4-Jan-18      | 1           | Pseudomonas psychrophila                            |                                 | Pseudomonas psychrophila                    | 1421   | 0           | F33                  | genomic DNA |         | milk                                                                                  | 1         | 1421     | FALSE   | ncbi_filtered | 122355  |
| NR_028619_1_1528            | 122355  | NR_028619      | Pseudomonas psychrophila strain E-3 16S ribosomal RNA, partial sequence                                 | 24-Oct-17     | 4-Jan-18      | 1           | Pseudomonas psychrophila                            | RefSeq                          | Pseudomonas psychrophila                    | 1528   | 1           | E-3; JCM 10889       | rRNA        |         |                                                                                       | 1         | 1528     | TRUE    | ncbi_filtered | 122355  |
| NR_134037_1_1362            | 123824  | NR_134037      | Frederiksenia canicola strain HPA21 16S ribosomal RNA, partial sequence                                 | 14-Dec-15     | 4-Jan-18      | 1           | Frederiksenia canicola                              | RefSeq                          | Frederiksenia canicola                      | 1362   | 0           | HPA21                | rRNA        |         | oral cavity                                                                           | 1         | 1362     | TRUE    | ncbi_filtered | 123824  |
| AF224307_1_1535             | 123834  | AF224307       | Haemophilus quentini 16S ribosomal RNA gene, partial sequence                                           | 13-Jun-00     | 4-Jan-18      | 1           | Haemophilus quentini                                |                                 | Haemophilus quentini                        | 1535   | 0           | MCCM 02026           | genomic DNA |         |                                                                                       | 1         | 1535     | FALSE   | ncbi_filtered | 123834  |
| NZ_MCI02000032_163_1708     | 123834  | NZ_MCI02000032 | Haemophilus quentini strain MP1 contig32, whole genome shotgun sequence                                 | 13-Apr-17     | 4-Jan-18      | 1           | Haemophilus quentini                                | WGS;RefSeq                      | Haemophilus quentini                        | 1546   | 0           | MP1                  | genomic DNA |         |                                                                                       | 163       | 1708     | FALSE   | ncbi_filtered | 123834  |
| KF358265_1_1447             | 128785  | KF358265       | Pseudoaeromonas mexicana strain M2-3 16S ribosomal RNA gene, partial sequence                           | 10-Mar-14     | 4-Jan-18      | 1           | Pseudoaeromonas mexicana                            |                                 | Pseudoaeromonas mexicana                    | 1447   | 0           | M2-3                 | genomic DNA |         | MTBE-contaminated soil sample                                                         | 1         | 1447     | FALSE   | ncbi_filtered | 128785  |
| KF358266_1_1447             | 128785  | KF358266       | Pseudoaeromonas mexicana strain M3 16S ribosomal RNA gene, partial sequence                             | 10-Mar-14     | 4-Jan-18      | 1           | Pseudoaeromonas mexicana                            |                                 | Pseudoaeromonas mexicana                    | 1453   | 0           | M3                   | genomic DNA |         | MTBE-contaminated soil sample                                                         | 1         | 1453     | FALSE   | ncbi_filtered | 128785  |
| KP050791_1_1447             | 128785  | KP050791       | Pseudoaeromonas mexicana strain EGE-B-3 16S ribosomal RNA gene, partial sequence                        | 21-Jun-16     | 4-Jan-18      | 1           | Pseudoaeromonas mexicana                            |                                 | Pseudoaeromonas mexicana                    | 1447   | 0           | EGE-B-3              | genomic DNA |         |                                                                                       | 1         | 1447     | FALSE   | ncbi_filtered | 128785  |
| K7581996_1_1447             | 128785  | K7581996       | Pseudoaeromonas mexicana strain YT-01 16S ribosomal RNA gene, partial sequence                          | 31-Aug-15     | 4-Jan-18      | 1           | Pseudoaeromonas mexicana                            |                                 | Pseudoaeromonas mexicana                    | 1447   | 0           | YT-01                | genomic DNA |         | sludge                                                                                | 1         | 1447     | FALSE   | ncbi_filtered | 128785  |
| NR_025105_1_1510            | 128785  | NR_025105      | Pseudoaeromonas mexicana strain AMX 268 16S ribosomal RNA, partial sequence                             | 24-Oct-17     | 4-Jan-18      | 1           | Pseudoaeromonas mexicana                            | RefSeq                          | Pseudoaeromonas mexicana                    | 1540   | 1           | AMX 268; ATCC 700993 | rRNA        |         | UASB reactor sludge                                                                   | 1         | 1540     | TRUE    | ncbi_filtered | 128785  |
| AF264034_1_1347             | 129556  | AF264034       | Butyrivibrio cf. fibrilosus EAT6 16S ribosomal RNA gene, partial sequence                               | 2-Jan-01      | 4-Jan-18      | 1           | Butyrivibrio cf. fibrilosus EAT6                    |                                 | Butyrivibrio cf. fibrilosus EAT6            | 1317   | 0           |                      | genomic DNA | EAT6    |                                                                                       | 1         | 1317     | FALSE   | ncbi_filtered | 129556  |
| JX417433_1_1455             | 129817  | JX417433       | Pseudomonas bremeri strain 56 16S ribosomal RNA gene, partial sequence                                  | 4-Aug-12      | 4-Jan-18      | 1           | Pseudomonas bremeri                                 |                                 | Pseudomonas bremeri                         | 1455   | 0           | 56                   | genomic DNA |         | mushroom                                                                              | 1         | 1455     | FALSE   | ncbi_filtered | 129817  |
| KU647658_1_1478             | 129817  | KU647658       | Pseudomonas bremeri strain BD11-00181 16S ribosomal RNA gene, partial sequence                          | 13-Feb-16     | 4-Jan-18      | 1           | Pseudomonas bremeri                                 |                                 | Pseudomonas bremeri                         | 1478   | 1           | BD11-00181           | genomic DNA |         | mineral water                                                                         | 1         | 1478     | TRUE    | ncbi_filtered | 129817  |
| KU750791_1_1475             | 129817  | KU750791       | Pseudomonas bremeri strain LMT2064-90 16S ribosomal RNA gene, partial sequence                          | 13-Mar-16     | 4-Jan-18      | 1           | Pseudomonas bremeri                                 |                                 | Pseudomonas bremeri                         | 1475   | 0           | LMT2064-90           | genomic DNA |         | rhizosphere from Lepidium meyenii                                                     | 1         | 1475     | FALSE   | ncbi_filtered | 129817  |
| KX187320_1_1451             | 129817  | KX187320       | Pseudomonas bremeri strain MG03 16S ribosomal RNA gene, partial sequence                                | 26-Jul-16     | 4-Jan-18      | 1           | Pseudomonas bremeri                                 |                                 | Pseudomonas bremeri                         | 1451   | 0           | MG03                 | genomic DNA |         | chili paste                                                                           | 1         | 1451     | FALSE   | ncbi_filtered | 129817  |
| MF957286_1_1405             | 129817  | MF957286       | Pseudomonas bremeri strain SBELC16 16S ribosomal RNA gene, partial sequence                             | 19-Sep-17     | 4-Jan-18      | 1           | Pseudomonas bremeri                                 |                                 | Pseudomonas bremeri                         | 1405   | 0           | SBELC16              | genomic DNA |         | coalmine area                                                                         | 1         | 1405     | FALSE   | ncbi_filtered | 129817  |
| KF030209_1_1502             | 131109  | KF030209       | Actinomyces bowdenii strain OH2481 16S ribosomal RNA gene, partial sequence                             | 24-Jun-13     | 4-Jan-18      | 1           | Actinomyces bowdenii                                |                                 | Actinomyces bowdenii                        | 1502   | 0           | OH2481               | genomic DNA |         | Surrey                                                                                | 1         | 1502     | FALSE   | ncbi_filtered | 131109  |
| NR_041982_1_1343            | 131109  | NR_041982      | Actinomyces bowdenii strain M1327/96/1 16S ribosomal RNA gene, partial sequence                         | 3-Feb-15      | 4-Jan-18      | 1           | Actinomyces bowdenii                                | RefSeq                          | Actinomyces bowdenii                        | 1513   | 0           | M1327/96/1           | rRNA        |         |                                                                                       | 1         | 1513     | TRUE    | ncbi_filtered | 131109  |
| HM210084_1_1516             | 131111  | HM210084       | Actinomyces turicensis strain A35750/P1 16S ribosomal RNA gene, partial sequence                        | 1-Jul-10      | 4-Jan-18      | 1           | Actinomyces turicensis                              |                                 | Actinomyces turicensis                      | 1346   | 0           | A35750/P1            | genomic DNA |         | wound swab from an 18 year old female diagnosed with a pilonidal cyst without abscess | 1         | 1346     | FALSE   | ncbi_filtered | 131111  |
| NR_037020_1_1453            | 131111  | NR_037020      | Actinomyces turicensis strain APL10 16S ribosomal RNA gene, partial sequence                            | 3-Feb-15      | 4-Jan-18      | 1           | Actinomyces turicensis                              | RefSeq                          | Actinomyces turicensis                      | 1453   | 2           | APL10; ATCC 51857    | rRNA        |         |                                                                                       | 1         | 1453     | TRUE    | ncbi_filtered | 131111  |
| NZ_JH815208_1599_3153       | 883077  | NZ_JH815208    | Actinomyces turicensis strain ACS-279-V-Co4 supercont1.1, whole genome shotgun sequence                 | 17-Apr-17     | 4-Jan-18      | 1           | Actinomyces turicensis                              | WGS;HIGH_QUALITY_DRAFT;RefSeq   | Actinomyces turicensis ACS-279-V-Co4        | 1555   | 0           | ACS-279-V-Co4        | genomic DNA |         | biological product (DNVO:02000043)                                                    | 1599      | 3153     | FALSE   | ncbi_filtered | 131111  |
| PKU0100013_1_1552           | 131111  | PKU0100013     | Actinomyces turicensis strain UMB0250 ER1203663.17957_1_75.13, whole genome shotgun sequence            | 28-Dec-17     | 4-Jan-18      | 1           | Actinomyces turicensis                              | WGS                             | Actinomyces turicensis                      | 1548   | 0           | UMB0250              | genomic DNA |         |                                                                                       | 5         | 1552     | FALSE   | ncbi_filtered | 131111  |
| AI292763_1_1366             | 134034  | AI292763       | Corynebacterium freneyi partial 16S rRNA gene, strain 20395347                                          | 19-Nov-01     | 4-Jan-18      | 1           | Corynebacterium freneyi                             | 16S ribosomal RNA;16S rRNA gene | Corynebacterium freneyi                     | 1366   | 0           | 20395347             | genomic DNA |         |                                                                                       | 1         | 1366     | FALSE   | ncbi_filtered | 134034  |
| EF462397_1_1374             | 134034  | EF462397       | Corynebacterium freneyi isolate 22 16S ribosomal RNA gene, partial sequence                             | 19-Feb-08     | 4-Jan-18      | 1           | Corynebacterium freneyi                             |                                 | Corynebacterium freneyi                     | 1374   | 9           |                      | genomic DNA |         | 22                                                                                    | 1         | 1374     | FALSE   | ncbi_filtered | 134034  |
| EF462398_1_1473             | 134034  | EF462398       | Corynebacterium freneyi isolate 2319 16S ribosomal RNA gene, partial sequence                           | 19-Feb-08     | 4-Jan-18      | 1           | Corynebacterium freneyi                             |                                 | Corynebacterium freneyi                     | 1473   | 0           |                      | genomic DNA |         | 2319                                                                                  | 1         | 1473     | FALSE   | ncbi_filtered | 134034  |
| NR_042025_1_1365            | 134034  | NR_042025      | Corynebacterium freneyi strain IPB 6695110 16S ribosomal RNA gene, partial sequence                     | 3-Feb-15      | 4-Jan-18      | 1           | Corynebacterium freneyi                             | RefSeq                          | Corynebacterium freneyi                     | 1365   | 1           | IPB 6695110          | rRNA        |         |                                                                                       | 1         | 1365     | TRUE    | ncbi_filtered | 134034  |
| NZ_INR0100043_3732_5260     | 1287475 | NZ_INR0100043  | Corynebacterium freneyi strain DNFO450 contig43, whole genome shotgun sequence                          | 17-Apr-17     | 4-Jan-18      | 1           | Corynebacterium freneyi                             | WGS;HIGH_QUALITY_DRAFT;RefSeq   | Corynebacterium freneyi DNFO450             | 1529   | 0           | DNFO450              | genomic DNA |         | vagina                                                                                | 3732      | 5260     | FALSE   | ncbi_filtered | 134034  |
| AB720138_1_1446             | 134533  | AB720138       | Acinetobacter parvus strain SPB 6695110 16S ribosomal RNA gene, partial sequence                        | 16-Nov-12     | 4-Jan-18      | 1           | Acinetobacter parvus                                |                                 | Acinetobacter parvus                        | 1446   | 1           | AS18                 | genomic DNA |         |                                                                                       | 1         | 1446     | FALSE   | ncbi_filtered | 134533  |
| KR06336_1_1355              | 134533  | KR06336        | Acinetobacter parvus strain 5-B2A 16S ribosomal RNA gene, partial sequence                              | 28-May-14     | 4-Jan-18      | 1           | Acinetobacter parvus                                |                                 | Acinetobacter parvus                        | 1355   | 0           | 5-B2A                | genomic DNA |         |                                                                                       | 1         | 1355     | FALSE   | ncbi_filtered | 134533  |
| NZ_ABE01000124_468_2012     | 981333  | NZ_ABE01000124 | Acinetobacter parvus DSM 16617 + CIP 108168 strain DSM 16617 contig_0124, whole genome shotgun sequence | 10-Apr-17     | 4-Jan-18      | 1           | Acinetobacter parvus DSM 16617 + CIP 108168         | WGS;RefSeq                      | Acinetobacter parvus DSM 16617 + CIP 108168 | 1545   | 0           | DSM 16617            | genomic DNA |         | ear from patient with otitis media                                                    | 468       | 2012     | TRUE    | ncbi_filtered | 134533  |
| NZ_KB849219_106628_108172   | 1217671 | NZ_KB849219    | Acinetobacter parvus strain NIPH 1103 acLZW-supercont1.12, whole genome shotgun sequence                | 6-Apr-17      | 4-Jan-18      | 1           | Acinetobacter parvus NIPH 1103                      | WGS;RefSeq                      | Acinetobacter parvus NIPH 1103              | 1545   | 0           | NIPH 1103            | genomic DNA |         | Skin                                                                                  | 106628    | 108172   | FALSE   | ncbi_filtered | 134533  |
| NZ_LACJ0100019_167_1710     | 134533  | NZ_LACJ0100019 | Acinetobacter parvus strain CM11 contig_25, whole genome shotgun sequence                               | 6-Apr-17      | 4-Jan-18      | 1           | Acinetobacter parvus                                | WGS;RefSeq                      | Acinetobacter parvus                        | 1544   | 0           | CM11                 | genomic DNA |         | intestine                                                                             | 167       | 1710     | FALSE   | ncbi_filtered | 134533  |
| JRVA0100019_167_1711        | 134534  | JRVA0100019    | Acinetobacter gyllenbergii strain FMP01 contig19, whole genome shotgun sequence                         | 8-Jul-16      | 4-Jan-18      | 1           | Acinetobacter gyllenbergii                          | WGS                             | Acinetobacter gyllenbergii                  | 1545   | 0           | FMP01                | genomic DNA |         | banana leaf                                                                           | 167       | 1711     | FALSE   | ncbi_filtered | 134534  |
| KJ806424_1_1362             | 134534  | KJ806424       | Acinetobacter gyllenbergii strain A-X15 16S ribosomal RNA gene, partial sequence                        | 28-May-14     | 4-Jan-18      | 1           | Acinetobacter gyllenbergii                          |                                 | Acinetobacter gyllenbergii                  | 1362   | 0           | A-X15                | genomic DNA |         |                                                                                       | 1         | 1362     | FALSE   | ncbi_filtered | 134534  |
| KJ806484_1_1371             | 134534  | KJ806484       | Acinetobacter gyllenbergii strain 5-89D 16S ribosomal RNA gene, partial sequence                        | 28-May-14     | 4-Jan-18      | 1           | Acinetobacter gyllenbergii                          |                                 | Acinetobacter gyllenbergii                  | 1371   | 0           | 5-89D                | genomic DNA |         |                                                                                       | 1         | 1371     | FALSE   | ncbi_filtered | 134534  |
| KY643485_1_1420             | 134534  | KY643485       | Acinetobacter gyllenbergii strain 28WNPMF 16S ribosomal RNA gene, partial sequence                      | 27-Feb-17     | 4-Jan-18      | 1           | Acinetobacter gyllenbergii                          |                                 | Acinetobacter gyllenbergii                  | 1420   | 0           | 28WNPMF              | genomic DNA |         | Borehole Water                                                                        | 1         | 1420     | FALSE   | ncbi_filtered | 134534  |
| LC014140_1_1497             | 134534  | LC014140       | Acinetobacter gyllenbergii strain NBRC 110496, partial sequence                                         | 18-Dec-14     | 4-Jan-18      | 1           | Acinetobacter gyllenbergii                          | </                              |                                             |        |             |                      |             |         |                                                                                       |           |          |         |               |         |



| seqname                       | tax_id  | accession       | description                                                                                         | modified_date | download_date | version | num_source | keywords                                   | organism                              | length | ambig_count | strain                | mol_type    | isolate | isolation_source                                                  | seq_start | seq_stop | is_type | collection    | species |
|-------------------------------|---------|-----------------|-----------------------------------------------------------------------------------------------------|---------------|---------------|---------|------------|--------------------------------------------|---------------------------------------|--------|-------------|-----------------------|-------------|---------|-------------------------------------------------------------------|-----------|----------|---------|---------------|---------|
| LC037221_1_1505               | 135083  | LC037221        | Selenomonas noxia gene for 16S ribosomal RNA, partial sequence, strain: JCM 8546                    | 25-Mar-15     | 4-Jan-18      | 1       |            | Selenomonas noxia                          | Selenomonas noxia                     | 1505   | 5           | JCM 8546              | genomic DNA |         |                                                                   | 1         | 1505     | TRUE    | ncbi_filtered | 135083  |
| AB047504_1_1470               | 135951  | AB047504        | Actinoplanes rutilosporangii gene for 16S rRNA, partial sequence                                    | 15-Dec-01     | 4-Jan-18      | 1       |            | Actinoplanes rutilosporangii               | Actinoplanes rutilosporangii          | 1470   | 0           | IFO 13970T            | genomic DNA |         |                                                                   | 1         | 1470     | FALSE   | ncbi_filtered | 135951  |
| GU904674_1_1365               | 136093  | GU904674        | Globicatella sulfidifaciens strain AB60 16S ribosomal RNA gene, partial sequence                    | 9-Sep-10      | 4-Jan-18      | 1       |            | Globicatella sulfidifaciens                | Globicatella sulfidifaciens           | 1365   | 0           | AB60                  | genomic DNA |         | alkaline fermented food condiments (Maari Baabab fermented seeds) | 1         | 1365     | FALSE   | ncbi_filtered | 136093  |
| LN871833_1_1465               | 136093  | LN871833        | Globicatella sulfidifaciens partial 16S rRNA gene, isolate TID-6                                    | 8-Sep-16      | 4-Jan-18      | 1       |            | Globicatella sulfidifaciens                | Globicatella sulfidifaciens           | 1465   | 0           |                       | genomic DNA | TID-6   | human patient                                                     | 1         | 1465     | FALSE   | ncbi_filtered | 136093  |
| NR_025437_1_1490              | 136093  | NR_025437       | Globicatella sulfidifaciens strain CCG 44365 16S ribosomal RNA gene, partial sequence               | 3-Feb-15      | 4-Jan-18      | 1       |            | Globicatella sulfidifaciens                | Globicatella sulfidifaciens           | 1490   | 7           | CCUG 44365            | rRNA        |         |                                                                   | 1         | 1490     | TRUE    | ncbi_filtered | 136093  |
| NZ_FUJ001000039_193_1747      | 1121925 | NZ_FUJ001000039 | Globicatella sulfidifaciens DSM 15739, whole genome shotgun sequence                                | 10-Mar-17     | 4-Jan-18      | 1       |            | Globicatella sulfidifaciens DSM 15739      | Globicatella sulfidifaciens DSM 15739 | 1555   | 0           | DSM 15739             | genomic DNA |         |                                                                   | 193       | 1747     | TRUE    | ncbi_filtered | 136093  |
| AY167851_1_1324               | 136100  | AY167851        | Knoella sinensis strain SAFR-013 16S ribosomal RNA gene, partial sequence                           | 9-Feb-09      | 4-Jan-18      | 1       |            | Knoella sinensis                           | Knoella sinensis                      | 1324   | 0           | SAFR-013              | genomic DNA |         |                                                                   | 1         | 1324     | FALSE   | ncbi_filtered | 136100  |
| NZ_AVPJ01000034_3705_5235     | 1385520 | NZ_AVPJ01000034 | Knoella sinensis KCTC 19936 contig36, whole genome shotgun sequence                                 | 17-Apr-17     | 4-Jan-18      | 1       |            | Knoella sinensis KCTC 19936                | Knoella sinensis KCTC 19936           | 1531   | 0           | KCTC 19936            | genomic DNA |         | cave                                                              | 3705      | 5235     | TRUE    | ncbi_filtered | 136100  |
| AJ279038_1_1506               | 137461  | AJ279038        | Aerosphaera taetra 16S rRNA gene, strain CCG 43036T                                                 | 15-Dec-01     | 4-Jan-18      | 1       |            | Aerosphaera taetra                         | Aerosphaera taetra                    | 1506   | 0           | CCUG 43036T           | genomic DNA |         |                                                                   | 1         | 1506     | FALSE   | ncbi_filtered | 137461  |
| EF111256_1_1293               | 137461  | EF111256        | Aerosphaera taetra strain RBEZCD-116 16S ribosomal RNA gene, partial sequence                       | 12-Dec-06     | 4-Jan-18      | 1       |            | Aerosphaera taetra                         | Aerosphaera taetra                    | 1293   | 0           | RBEZCD-116            | genomic DNA |         | Bogota River site E2-Se-Arm                                       | 1         | 1293     | FALSE   | ncbi_filtered | 137461  |
| AB022026_1_1407               | 137732  | AB022026        | Abiotrophia elegans gene for 16S rRNA, partial sequence, strain HHCS                                | 4-Sep-99      | 4-Jan-18      | 1       |            | Granulicatella elegans                     | Granulicatella elegans                | 1407   | 1           | HHCS                  | genomic DNA |         |                                                                   | 1         | 1407     | FALSE   | ncbi_filtered | 137732  |
| JN801174_1_1440               | 137732  | JN801174        | Granulicatella elegans strain WHMH11 16S ribosomal RNA gene, partial sequence                       | 12-Nov-11     | 4-Jan-18      | 1       |            | Granulicatella elegans                     | Granulicatella elegans                | 1440   | 0           | WHMH11                | genomic DNA |         | blood                                                             | 1         | 1440     | FALSE   | ncbi_filtered | 137732  |
| NR_028682_1_1538              | 137732  | NR_028682       | Granulicatella elegans strain B1333 16S ribosomal RNA, partial sequence                             | 24-Oct-17     | 4-Jan-18      | 1       |            | Granulicatella elegans                     | Granulicatella elegans                | 1538   | 0           | B1333; ATCC 700633    | rRNA        |         |                                                                   | 1         | 1538     | TRUE    | ncbi_filtered | 137732  |
| NZ_KJ391971_413602_415161     | 626369  | NZ_KJ391971     | Granulicatella elegans ATCC 700633 supercont2.1, whole genome shotgun sequence                      | 17-Apr-17     | 4-Jan-18      | 1       |            | Granulicatella elegans ATCC 700633         | WGS;HIGH_QUALITY_DRAFT;RefSeq         | 1560   | 0           | ATCC 700633           | genomic DNA |         |                                                                   | 413602    | 415161   | TRUE    | ncbi_filtered | 137732  |
| Y15408_30_1400                | 137732  | Y15408          | Granulicatella elegans 16S rRNA gene, strain 2640-91                                                | 26-Sep-00     | 4-Jan-18      | 1       |            | Granulicatella elegans                     | Granulicatella elegans                | 30     | 1731        | 2640-91               | genomic DNA |         |                                                                   | 30        | 1400     | FALSE   | ncbi_filtered | 137732  |
| EU977834_1_1440               | 138336  | EU977834        | Blastococcus saxobidens strain ZP01A 16S ribosomal RNA gene, partial sequence                       | 8-Jul-13      | 4-Jan-18      | 1       |            | Blastococcus saxobidens                    | Blastococcus saxobidens               | 1440   | 1           | ZP01A                 | genomic DNA |         | Kennedy Space Center clean-room floor                             | 1         | 1440     | FALSE   | ncbi_filtered | 138336  |
| FR865876_1_1451               | 138336  | FR865876        | Blastococcus saxobidens partial 16S rRNA gene, strain CI-1                                          | 24-May-12     | 4-Jan-18      | 1       |            | Blastococcus saxobidens                    | Blastococcus saxobidens               | 1451   | 0           | CI-1                  | genomic DNA |         | stone                                                             | 1         | 1451     | FALSE   | ncbi_filtered | 138336  |
| KM364560_1_1364               | 138336  | KM364560        | Blastococcus saxobidens 16S ribosomal RNA gene, partial sequence                                    | 31-Dec-15     | 4-Jan-18      | 1       |            | Blastococcus saxobidens                    | Blastococcus saxobidens               | 1364   | 0           | TPS418                | genomic DNA |         | Marine sediments collected at 7 m depth                           | 1         | 1364     | FALSE   | ncbi_filtered | 138336  |
| KU258212_1_1470               | 138336  | KU258212        | Blastococcus saxobidens strain AL15 16S ribosomal RNA gene, partial sequence                        | 12-Mar-16     | 4-Jan-18      | 1       |            | Blastococcus saxobidens                    | Blastococcus saxobidens               | 1470   | 0           | AL15                  | genomic DNA |         | lithic environment                                                | 1         | 1470     | FALSE   | ncbi_filtered | 138336  |
| NC_016943_135353_165080       | 146883  | NC_016943       | Blastococcus saxobidens DD2 complete genome                                                         | 18-May-17     | 4-Jan-18      | 1       |            | Blastococcus saxobidens DD2                | RefSeq;complete genome                | 1528   | 0           | DD2                   | genomic DNA |         |                                                                   | 135353    | 165080   | FALSE   | ncbi_filtered | 138336  |
| JN713151_1_1526               | 143361  | JN713151        | Filifactor alovis canine oral taxon O01 clone OB017 16S ribosomal RNA gene, partial sequence        | 9-May-12      | 4-Jan-18      | 1       |            | Filifactor alovis                          | ENV                                   | 1526   | 0           |                       | genomic DNA |         | oral cavity subgingival plaque                                    | 1         | 1526     | FALSE   | ncbi_filtered | 143361  |
| JN713152_1_1526               | 143361  | JN713152        | Filifactor alovis canine oral taxon O01 clone OB055 16S ribosomal RNA gene, partial sequence        | 9-May-12      | 4-Jan-18      | 1       |            | Filifactor alovis                          | ENV                                   | 1526   | 0           |                       | genomic DNA |         | oral cavity subgingival plaque                                    | 1         | 1526     | FALSE   | ncbi_filtered | 143361  |
| NC_016630_1144586_1146126     | 546269  | NC_016630       | Filifactor alovis ATCC 35896, complete genome                                                       | 17-Apr-17     | 4-Jan-18      | 1       |            | Filifactor alovis ATCC 35896               | RefSeq                                | 1541   | 0           | ATCC 35896            | genomic DNA |         |                                                                   | 1144586   | 1146126  | TRUE    | ncbi_filtered | 143361  |
| NC_016630_924187_925727       | 546269  | NC_016630       | Filifactor alovis ATCC 35896, complete genome                                                       | 17-Apr-17     | 4-Jan-18      | 1       |            | Filifactor alovis ATCC 35896               | RefSeq                                | 1541   | 0           | ATCC 35896            | genomic DNA |         |                                                                   | 924187    | 925727   | TRUE    | ncbi_filtered | 143361  |
| JM010948_1_1493               | 144185  | JM010948        | Leifsonia aquatica strain A1 16S ribosomal RNA gene, partial sequence                               | 25-Jul-12     | 4-Jan-18      | 1       |            | Leifsonia aquatica                         |                                       | 1493   | 0           | A1                    | genomic DNA |         | biotic mineral and soil                                           | 1         | 1493     | FALSE   | ncbi_filtered | 144185  |
| KF742684_1_1293               | 144185  | KF742684        | Leifsonia aquatica strain H1a1 16S ribosomal RNA gene, partial sequence                             | 12-Nov-14     | 4-Jan-18      | 1       |            | Leifsonia aquatica                         |                                       | 1293   | 2           | H1a1                  | genomic DNA |         | plant phytotoma                                                   | 1         | 1293     | FALSE   | ncbi_filtered | 144185  |
| KP318478_1_1372               | 144185  | KP318478        | Leifsonia aquatica strain DUC3731 16S ribosomal RNA gene, partial sequence                          | 20-Apr-15     | 4-Jan-18      | 1       |            | Leifsonia aquatica                         |                                       | 1372   | 0           | DUC3731               | genomic DNA |         |                                                                   | 1         | 1372     | FALSE   | ncbi_filtered | 144185  |
| NZ_AVMR01000006_125584_127111 | 1416759 | NZ_AVMR01000006 | Leifsonia aquatica H1a1 Contig6, whole genome shotgun sequence                                      | 9-Apr-17      | 4-Jan-18      | 1       |            | Leifsonia aquatica H1a1                    | WGS;RefSeq                            | 1528   | 0           | H1a1                  | genomic DNA |         | Carnivorous Plant Phytotoma                                       | 125584    | 127111   | FALSE   | ncbi_filtered | 144185  |
| NZ_KI271991_1018_2545         | 1358026 | NZ_KI271991     | Leifsonia aquatica ATCC 14665 Scaffold135, whole genome shotgun sequence                            | 9-Apr-17      | 4-Jan-18      | 1       |            | Leifsonia aquatica ATCC 14665              | WGS;HIGH_QUALITY_DRAFT;RefSeq         | 1528   | 0           | ATCC 14665            | genomic DNA |         |                                                                   | 1018      | 2545     | TRUE    | ncbi_filtered | 144185  |
| A012838_1_1468                | 146827  | A012838         | Corynebacterium sp. strain UCL557_16S rRNA gene, partial                                            | 4-Dec-02      | 4-Jan-18      | 1       |            | Corynebacterium simulans                   | 16S ribosomal RNA;16S rRNA gene       | 1468   | 0           | UCL557                | genomic DNA |         |                                                                   | 1         | 1468     | FALSE   | ncbi_filtered | 146827  |
| NZ_CP014634_1969113_1970640   | 146827  | NZ_CP014634     | Corynebacterium simulans strain PES1, complete genome                                               | 12-Apr-17     | 4-Jan-18      | 1       |            | Corynebacterium simulans                   | RefSeq                                | 1528   | 0           | PES1                  | genomic DNA |         | Skin swab                                                         | 1969113   | 1970640  | FALSE   | ncbi_filtered | 146827  |
| NZ_CP014635_163675_162023     | 146827  | NZ_CP014635     | Corynebacterium simulans strain Wattiau, complete genome                                            | 12-Apr-17     | 4-Jan-18      | 1       |            | Corynebacterium simulans                   | RefSeq                                | 1529   | 0           | Wattiau               | genomic DNA |         | Skin swab                                                         | 163675    | 162023   | FALSE   | ncbi_filtered | 146827  |
| NZ_CP014635_1696798_1698326   | 146827  | NZ_CP014635     | Corynebacterium simulans strain Wattiau, complete genome                                            | 12-Apr-17     | 4-Jan-18      | 1       |            | Corynebacterium simulans                   | RefSeq                                | 1529   | 0           | Wattiau               | genomic DNA |         | Skin swab                                                         | 1696798   | 1698326  | FALSE   | ncbi_filtered | 146827  |
| NZ_CP014635_758705_760233     | 146827  | NZ_CP014635     | Corynebacterium simulans strain Wattiau, complete genome                                            | 12-Apr-17     | 4-Jan-18      | 1       |            | Corynebacterium simulans                   | RefSeq                                | 1529   | 0           | Wattiau               | genomic DNA |         | Skin swab                                                         | 758705    | 760233   | FALSE   | ncbi_filtered | 146827  |
| AB037383_1_1470               | 147207  | AB037383        | Collinsella sp. RCAS6-80 gene for 16S rRNA                                                          | 26-Oct-00     | 4-Jan-18      | 1       |            | Collinsella intestinalis                   | 16S rRNA;16S ribosomal RNA            | 1469   | 0           | RCAS6-80              | genomic DNA |         |                                                                   | 1         | 1460     | FALSE   | ncbi_filtered | 147207  |
| ABX0200033_12176_23668        | 521003  | ABX0200033      | Collinsella intestinalis DSM 13280 C_intestinalis_1.0.1_Comb.6, whole genome shotgun sequence       | 4-Jun-13      | 4-Jan-18      | 1       |            | Collinsella intestinalis DSM 13280         | WGS                                   | 1469   | 0           | DSM 13280             | genomic DNA |         |                                                                   | 22176     | 23668    | TRUE    | ncbi_filtered | 147207  |
| NR_027528_1_1459              | 147207  | NR_027528       | Collinsella intestinalis strain RCAS6-68 16S ribosomal RNA gene, partial sequence                   | 3-Feb-15      | 4-Jan-18      | 1       |            | Collinsella intestinalis                   | RefSeq                                | 1459   | 0           | RCAS6-68; DSM 13280   | rRNA        |         |                                                                   | 1         | 1459     | TRUE    | ncbi_filtered | 147207  |
| NZ_GG692711_445_1961          | 521003  | NZ_GG692711     | Collinsella intestinalis DSM 13280 Scfdd_02_1, whole genome shotgun sequence                        | 17-Apr-17     | 4-Jan-18      | 1       |            | Collinsella intestinalis DSM 13280         | WGS;RefSeq                            | 1517   | 0           | DSM 13280             | genomic DNA |         | biological product (ENVO:02000043)                                | 445       | 1961     | TRUE    | ncbi_filtered | 147207  |
| KR812405_1_1428               | 1758721 | KR812405        | Carnobacterium inhibens subsp. inhibens strain EA18 16S ribosomal RNA gene, partial sequence        | 5-Jan-16      | 4-Jan-18      | 1       |            | Carnobacterium inhibens subsp. inhibens    |                                       | 1428   | 0           | EA18                  | genomic DNA |         |                                                                   | 1         | 1428     | FALSE   | ncbi_filtered | 147207  |
| KT719440_1_1440               | 1758721 | KT719440        | Carnobacterium inhibens subsp. inhibens strain MER_TA_33.2 16S ribosomal RNA gene, partial sequence | 28-Nov-15     | 4-Jan-18      | 1       |            | Carnobacterium inhibens subsp. inhibens    |                                       | 1440   | 0           | MER_TA_33.2           | genomic DNA |         | Mars Exploration Rover spacecraft surfaces                        | 1         | 1440     | FALSE   | ncbi_filtered | 147207  |
| NC_022606_1305261_1306833     | 1266845 | NC_022606       | Carnobacterium inhibens subsp. gilchinskyi strain WN1359, complete genome                           | 9-Apr-17      | 4-Jan-18      | 1       |            | Carnobacterium inhibens subsp. gilchinskyi | RefSeq                                | 1573   | 0           | WN1359                | genomic DNA |         | Siberian permafrost                                               | 1305261   | 1306833  | TRUE    | ncbi_filtered | 147207  |
| NC_022606_130690_132263       | 1266845 | NC_022606       | Carnobacterium inhibens subsp. gilchinskyi strain WN1359, complete genome                           | 9-Apr-17      | 4-Jan-18      | 1       |            | Carnobacterium inhibens subsp. gilchinskyi | RefSeq                                | 1574   | 0           | WN1359                | genomic DNA |         | Siberian permafrost                                               | 130690    | 132263   | TRUE    | ncbi_filtered | 147207  |
| NC_022606_521930_523502       | 1266845 | NC_022606       | Carnobacterium inhibens subsp. gilchinskyi strain WN1359, complete genome                           | 9-Apr-17      | 4-Jan-18      | 1       |            | Carnobacterium inhibens subsp. gilchinskyi | RefSeq                                | 1573   | 0           | WN1359                | genomic DNA |         | Siberian permafrost                                               | 521930    | 523502   | TRUE    | ncbi_filtered | 147207  |
| NR_089682_1_1539              | 147802  | NR_089682       | Lactobacillus iners strain DSM 13335 16S ribosomal RNA gene, partial sequence                       | 3-Feb-15      | 4-Jan-18      | 1       |            | Lactobacillus iners                        | RefSeq                                | 1539   | 0           | DSM 13335; CCUG 28746 | rRNA        |         |                                                                   | 1         | 1539     | TRUE    | ncbi_filtered | 147802  |
| NZ_ADHG01000001_461221_462795 | 713605  | NZ_ADHG01000001 | Lactobacillus iners AB-1 scaffold_1, whole genome shotgun sequence                                  | 15-Nov-17     | 4-Jan-18      | 1       |            | Lactobacillus iners AB-1                   | WGS;RefSeq                            | 1575   | 0           | AB-1                  | genomic DNA |         |                                                                   | 461221    | 462795   | FALSE   | ncbi_filtered | 147802  |
| NZ_ADHG01000002_652469_654043 | 713605  | NZ_ADHG01000002 | Lactobacillus iners AB-1 scaffold_1, whole genome shotgun sequence                                  | 15-Nov-17     | 4-Jan-18      | 1       |            | Lactobacillus iners AB-1                   | WGS;RefSeq                            | 1575   | 0           | AB-1                  | genomic DNA |         |                                                                   | 652469    | 654043   | FALSE   | ncbi_filtered | 147802  |
| NZ_AEKH01000023_1_1321        | 879301  | NZ_AEKH01000023 | Lactobacillus iners LEAF 2053A-b contig00017, whole genome shotgun sequence                         | 15-Nov-17     | 4-Jan-18      | 1       |            | Lactobacillus iners LEAF 2053A-b           | WGS;HIGH_QUALITY_DRAFT;RefSeq         | 1321   | 0           | LEAF 2053A-b          | genomic DNA |         | biological product (ENVO:02000043)                                | 1         | 1321     | FALSE   | ncbi_filtered | 147802  |
| NZ_AEKO100002_1005_1678       | 879303  | NZ_AEKO100002   | Lactobacillus iners LEAF 2062A-h1 contig00085, whole genome shotgun sequence                        | 15-Nov-17     | 4-Jan-18      | 1       |            | Lactobacillus iners LEAF 2062A-h1          | WGS;HIGH_QUALITY_DRAFT;RefSeq         | 1574   | 0           | LEAF 2062A-h1         | genomic DNA |         | biological product (ENVO:02000043)                                | 105       | 1678     | FALSE   | ncbi_filtered | 147802  |
| MH109016_1_1430               | 149016  | MH109016        | Streptococcus urinalis strain 3P55 16S ribosomal RNA gene, partial sequence                         | 28-Mar-18     | 31-Mar-18     | 1       |            | Streptococcus urinalis                     |                                       | 1430   | 0           | 3P55                  | genomic DNA |         | cervicovaginal fluid sample                                       | 1         | 1430     | FALSE   | ncbi_filtered | 149016  |
| MH109017_1_1428               | 149016  | MH109017        | Streptococcus urinalis strain 2285-97 16S ribosomal RNA gene, partial sequence                      | 28-Mar-18     | 31-Mar-18     | 1       |            | Streptococcus urinalis                     |                                       | 1428   | 0           | 3P55                  | genomic DNA |         | cervicovaginal fluid sample                                       | 1         | 1428     | FALSE   | ncbi_filtered | 14      |

| seqname                       | tax_id | accession       | description                                                                                            | modified_date | download_date | version | num_source | keywords                      | organism                         | length | ambig_count | strain                       | mol_type    | isolate | isolation_source                                                         | seq_start | seq_stop | is_type | collection    | species |
|-------------------------------|--------|-----------------|--------------------------------------------------------------------------------------------------------|---------------|---------------|---------|------------|-------------------------------|----------------------------------|--------|-------------|------------------------------|-------------|---------|--------------------------------------------------------------------------|-----------|----------|---------|---------------|---------|
| KM487704_1_1564               | 152480 | KM487704        | Burkholderia ambfararia strain 1835 16S ribosomal RNA gene, partial sequence                           | 3-Dec-14      | 4-Jan-18      | 1       |            |                               | Burkholderia ambfararia          | 1564   | 0           | 1835                         | genomic DNA |         |                                                                          | 1         | 1564     | FALSE   | ncbi_filtered | 152480  |
| AB480750_1_1455               | 152682 | AB480750        | Sphingomonas melonis gene for 16S ribosomal RNA, partial sequence, strain: Acj 102                     | 1-Oct-09      | 4-Jan-18      | 1       |            |                               | Sphingomonas melonis             | 1455   | 0           | Acj 102                      | genomic DNA |         |                                                                          | 1         | 1455     | FALSE   | ncbi_filtered | 152682  |
| EU739093_1_1387               | 152682 | EU739093        | Sphingomonas melonis strain 150 16S ribosomal RNA gene, partial sequence                               | 10-Mar-09     | 4-Jan-18      | 1       |            |                               | Sphingomonas melonis             | 1387   | 0           | 150                          | genomic DNA |         |                                                                          | 1         | 1387     | FALSE   | ncbi_filtered | 152682  |
| GU332608_1_1358               | 152682 | GU332608        | Sphingomonas melonis strain A21-11 16S ribosomal RNA gene, partial sequence                            | 2-Feb-10      | 4-Jan-18      | 1       |            |                               | Sphingomonas melonis             | 1358   | 0           | A21-11                       | genomic DNA |         | Longshan potassium mine                                                  | 1         | 1358     | FALSE   | ncbi_filtered | 152682  |
| LC191557_1_1330               | 152682 | LC191557        | Sphingomonas melonis gene for 16S rRNA, partial sequence, strain: dml_2                                | 19-Oct-16     | 4-Jan-18      | 1       |            |                               | Sphingomonas melonis             | 1330   | 0           | dml_2                        | genomic DNA |         |                                                                          | 1         | 1330     | FALSE   | ncbi_filtered | 152682  |
| MG576166_1_1395               | 152682 | MG576166        | Sphingomonas melonis strain KBL13 16S ribosomal RNA gene, partial sequence                             | 3-Dec-17      | 4-Jan-18      | 1       |            |                               | Sphingomonas melonis             | 1395   | 0           | KBL13                        | genomic DNA |         | soil                                                                     | 1         | 1395     | FALSE   | ncbi_filtered | 152682  |
| AF328155_1_1463               | 153493 | AF328155        | Simonsiella steeidae strain ATCC29445 16S ribosomal RNA gene, partial sequence                         | 23-Jul-02     | 4-Jan-18      | 1       |            |                               | Conchiformibius steeidae         | 1463   | 0           | ATCC 29445                   | genomic DNA |         |                                                                          | 1         | 1463     | FALSE   | ncbi_filtered | 153493  |
| JN713445_1_1498               | 153493 | JN713445        | Conchiformibius steeidae canine oral taxon 280 clone 10015 16S ribosomal RNA gene, partial sequence    | 9-May-12      | 4-Jan-18      | 1       |            | ENV                           | Conchiformibius steeidae         | 1498   | 0           |                              | genomic DNA |         | oral cavity subgingival plaque                                           | 1         | 1498     | FALSE   | ncbi_filtered | 153493  |
| JN713446_1_1498               | 153493 | JN713446        | Conchiformibius steeidae canine oral taxon 280 clone 20010 16S ribosomal RNA gene, partial sequence    | 9-May-12      | 4-Jan-18      | 1       |            | ENV                           | Conchiformibius steeidae         | 1498   | 0           |                              | genomic DNA |         | oral cavity subgingival plaque                                           | 1         | 1498     | FALSE   | ncbi_filtered | 153493  |
| NR_040931_1_1479              | 153493 | NR_040931       | Conchiformibius steeidae strain IAM 14972 16S ribosomal RNA, partial sequence                          | 24-Oct-17     | 4-Jan-18      | 1       |            | RefSeq                        | Conchiformibius steeidae         | 1479   | 0           | IAM 14972                    | rRNA        |         |                                                                          | 1         | 1479     | TRUE    | ncbi_filtered | 153493  |
| NR_114100_1_1466              | 153493 | NR_114100       | Conchiformibius steeidae strain NBRC 102457 16S ribosomal RNA gene, partial sequence                   | 3-Feb-15      | 4-Jan-18      | 1       |            | RefSeq                        | Conchiformibius steeidae         | 1466   | 9           | NBRC 102457                  | rRNA        |         |                                                                          | 1         | 1466     | TRUE    | ncbi_filtered | 153493  |
| AY552788_1_1493               | 154046 | AY552788        | Clostridium hathewayi 16S ribosomal RNA gene, complete sequence                                        | 8-Nov-04      | 4-Jan-18      | 2       |            |                               | Hungatella hathewayi             | 1493   | 0           |                              | genomic DNA |         |                                                                          | 1         | 1493     | FALSE   | ncbi_filtered | 154046  |
| NR_036928_1_1431              | 154046 | NR_036928       | [Clostridium] hathewayi strain 1313 16S ribosomal RNA gene, partial sequence                           | 3-Feb-15      | 4-Jan-18      | 1       |            | RefSeq                        | Hungatella hathewayi             | 1431   | 4           | 1313; DSM 13479; CCLUG 43506 | rRNA        |         |                                                                          | 1         | 1431     | TRUE    | ncbi_filtered | 154046  |
| NZ_CVZ01000004_470356_471897  | 154046 | NZ_CVZ01000004  | Hungatella hathewayi strain 27895TDY5608850, whole genome shotgun sequence                             | 4-Apr-17      | 4-Jan-18      | 1       |            | WGS;RefSeq                    | Hungatella hathewayi             | 1542   | 0           | 27895TDY5608850              | genomic DNA |         | faeces                                                                   | 470356    | 471897   | FALSE   | ncbi_filtered | 154046  |
| NZ_CZAD01000082_1_1269        | 154046 | NZ_CZAD01000082 | Hungatella hathewayi strain 27895TDY5834916, whole genome shotgun sequence                             | 4-Apr-17      | 4-Jan-18      | 1       |            | WGS;RefSeq                    | Hungatella hathewayi             | 1269   | 0           | 27895TDY5834916              | genomic DNA |         | faeces                                                                   | 1         | 1269     | FALSE   | ncbi_filtered | 154046  |
| NZ_KB850951_148008_149549     | 999412 | NZ_KB850951     | Hungatella hathewayi 12489931 acyl-supercorn1.2, whole genome shotgun sequence                         | 19-May-17     | 4-Jan-18      | 1       |            | WGS;HIGH_QUALITY_DRAFT;RefSeq | Hungatella hathewayi 12489931    | 1249   | 0           | 12489931                     | genomic DNA |         |                                                                          | 148008    | 149549   | FALSE   | ncbi_filtered | 154046  |
| HQ646364_1_1477               | 154288 | HQ646364        | Turicibacter sanguinis strain 111732/2010 16S ribosomal RNA gene, partial sequence                     | 8-May-11      | 4-Jan-18      | 1       |            |                               | Turicibacter sanguinis           | 1477   | 0           | 111732/2010                  | genomic DNA |         | blood culture from a 59-year-old man                                     | 1         | 1477     | FALSE   | ncbi_filtered | 154288  |
| NZ_CYXW01000004_203360_204886 | 154288 | NZ_CYXW01000004 | Turicibacter sanguinis strain 27895TDY5608821, whole genome shotgun sequence                           | 11-Apr-17     | 4-Jan-18      | 1       |            | WGS;RefSeq                    | Turicibacter sanguinis           | 1527   | 0           | 27895TDY5608821              | genomic DNA |         | faeces                                                                   | 203360    | 204886   | FALSE   | ncbi_filtered | 154288  |
| NZ_CYSY01000008_3335_4859     | 154288 | NZ_CYSY01000008 | Turicibacter sanguinis strain 27895TDY5608865, whole genome shotgun sequence                           | 11-Apr-17     | 4-Jan-18      | 1       |            | WGS;RefSeq                    | Turicibacter sanguinis           | 1525   | 0           | 27895TDY5608865              | genomic DNA |         | faeces                                                                   | 3335      | 4859     | FALSE   | ncbi_filtered | 154288  |
| JN713287_1_1560               | 156456 | JN713287        | Anaeroglobus geminatus canine oral taxon 119 clone O032 16S ribosomal RNA gene, partial sequence       | 9-May-12      | 4-Jan-18      | 1       |            | ENV                           | Anaeroglobus geminatus           | 1560   | 0           |                              | genomic DNA |         | oral cavity subgingival plaque                                           | 1         | 1560     | FALSE   | ncbi_filtered | 156456  |
| NR_028812_1_1408              | 156456 | NR_028812       | Anaeroglobus geminatus strain AIP313.00 16S ribosomal RNA gene, partial sequence                       | 3-Feb-15      | 4-Jan-18      | 1       |            | RefSeq                        | Anaeroglobus geminatus           | 1408   | 0           | AIP313.00                    | rRNA        |         |                                                                          | 1         | 1408     | TRUE    | ncbi_filtered | 156456  |
| NZ_JH417596_158_1477          | 861450 | NZ_JH417596     | Anaeroglobus geminatus F0357 Scl047, whole genome shotgun sequence                                     | 17-Apr-17     | 4-Jan-18      | 1       |            | WGS;HIGH_QUALITY_DRAFT;RefSeq | Anaeroglobus geminatus F0357     | 1457   | 0           | F0357                        | genomic DNA |         | oral cavity                                                              | 158       | 1477     | FALSE   | ncbi_filtered | 156456  |
| EU848548_1_1457               | 156976 | EU848548        | Corynebacterium riegelii strain CTF08-1967 16S ribosomal RNA gene, partial sequence                    | 5-Dec-13      | 4-Jan-18      | 1       |            |                               | Corynebacterium riegelii         | 1457   | 1           | CTF08-1967                   | genomic DNA |         | blood culture                                                            | 1         | 1457     | FALSE   | ncbi_filtered | 156976  |
| NR_026434_1_1383              | 156976 | NR_026434       | Corynebacterium riegelii strain DMZM 2415 16S ribosomal RNA gene, partial sequence                     | 3-Feb-15      | 4-Jan-18      | 1       |            | RefSeq                        | Corynebacterium riegelii         | 1383   | 1           | DMZM 2415                    | rRNA        |         |                                                                          | 1         | 1383     | TRUE    | ncbi_filtered | 156976  |
| NZ_CP012342_2194911_2196433   | 156976 | NZ_CP012342     | Corynebacterium riegelii strain PUDD_83A45 genome                                                      | 16-Apr-17     | 4-Jan-18      | 1       |            | RefSeq                        | Corynebacterium riegelii         | 1523   | 0           | PUDD_83A45                   | genomic DNA |         | urine                                                                    | 2194911   | 2196433  | FALSE   | ncbi_filtered | 156976  |
| NZ_CP012342_2588517_2560038   | 156976 | NZ_CP012342     | Corynebacterium riegelii strain PUDD_83A45 genome                                                      | 16-Apr-17     | 4-Jan-18      | 1       |            | RefSeq                        | Corynebacterium riegelii         | 1522   | 0           | PUDD_83A45                   | genomic DNA |         | urine                                                                    | 2588517   | 2560038  | FALSE   | ncbi_filtered | 156976  |
| NZ_CP012342_793524_795045     | 156976 | NZ_CP012342     | Corynebacterium riegelii strain PUDD_83A45 genome                                                      | 16-Apr-17     | 4-Jan-18      | 1       |            | RefSeq                        | Corynebacterium riegelii         | 1522   | 0           | PUDD_83A45                   | genomic DNA |         | urine                                                                    | 793524    | 795045   | FALSE   | ncbi_filtered | 156976  |
| AF537597_1_1460               | 156978 | AF537597        | Corynebacterium imitans isolate 01-0063 16S ribosomal RNA gene, partial sequence                       | 31-Oct-02     | 4-Jan-18      | 1       |            |                               | Corynebacterium imitans          | 1460   | 0           |                              | genomic DNA |         | National Microbiology Laboratory Special Bacteriology Identifier 01-0063 | 1         | 1460     | FALSE   | ncbi_filtered | 156978  |
| NR_026369_1_1472              | 156978 | NR_026369       | Corynebacterium imitans strain 2023 16S ribosomal RNA gene, partial sequence                           | 3-Feb-15      | 4-Jan-18      | 1       |            | RefSeq;16S rRNA               | Corynebacterium imitans          | 1472   | 0           | 2023; ATCC 700354            | rRNA        |         |                                                                          | 1         | 1472     | TRUE    | ncbi_filtered | 156978  |
| NZ_CP009211_204495_2046024    | 156978 | NZ_CP009211     | Corynebacterium imitans strain DSM 44264, complete genome                                              | 17-Apr-17     | 4-Jan-18      | 1       |            | RefSeq                        | Corynebacterium imitans          | 1530   | 1           | DSM 44264                    | genomic DNA |         | 5-month-old boy with 'pharyngeal diptheria'                              | 204495    | 2046024  | TRUE    | ncbi_filtered | 156978  |
| NZ_L1906467_1329044_1330573   | 156978 | NZ_L1906467     | Corynebacterium imitans strain NCTC13015 genome assembly, chromosome 1                                 | 28-Aug-17     | 4-Jan-18      | 1       |            | RefSeq                        | Corynebacterium imitans          | 1530   | 0           | NCTC13015                    | genomic DNA |         |                                                                          | 1329044   | 1330573  | TRUE    | ncbi_filtered | 156978  |
| NZ_L1906467_2126769_2128298   | 156978 | NZ_L1906467     | Corynebacterium imitans strain NCTC13015 genome assembly, chromosome 1                                 | 28-Aug-17     | 4-Jan-18      | 1       |            | RefSeq                        | Corynebacterium imitans          | 1530   | 0           | NCTC13015                    | genomic DNA |         |                                                                          | 2126769   | 2128298  | TRUE    | ncbi_filtered | 156978  |
| EU086787_1_1446               | 156979 | EU086787        | Arthrobacter cummingsii strain 1378 16S ribosomal RNA gene, partial sequence                           | 4-Nov-13      | 4-Jan-18      | 1       |            |                               | Pseudoglutamicibacter cummingsii | 1446   | 0           | 1378                         | genomic DNA |         |                                                                          | 1         | 1446     | FALSE   | ncbi_filtered | 156979  |
| EU086803_1_1453               | 156979 | EU086803        | Arthrobacter cummingsii strain 720 16S ribosomal RNA gene, partial sequence                            | 4-Nov-13      | 4-Jan-18      | 1       |            |                               | Pseudoglutamicibacter cummingsii | 1453   | 0           | 720                          | genomic DNA |         |                                                                          | 1         | 1453     | FALSE   | ncbi_filtered | 156979  |
| EU086804_1_1452               | 156979 | EU086804        | Arthrobacter cummingsii strain 740 16S ribosomal RNA gene, partial sequence                            | 4-Nov-13      | 4-Jan-18      | 1       |            |                               | Pseudoglutamicibacter cummingsii | 1452   | 0           | 740                          | genomic DNA |         |                                                                          | 1         | 1452     | FALSE   | ncbi_filtered | 156979  |
| EU086806_1_1441               | 156979 | EU086806        | Arthrobacter cummingsii strain 742 16S ribosomal RNA gene, partial sequence                            | 4-Nov-13      | 4-Jan-18      | 1       |            |                               | Pseudoglutamicibacter cummingsii | 1441   | 0           | 742                          | genomic DNA |         |                                                                          | 1         | 1441     | FALSE   | ncbi_filtered | 156979  |
| EU086819_1_1450               | 156979 | EU086819        | Arthrobacter cummingsii strain G664 16S ribosomal RNA gene, partial sequence                           | 4-Nov-13      | 4-Jan-18      | 1       |            |                               | Pseudoglutamicibacter cummingsii | 1450   | 0           | G664                         | genomic DNA |         |                                                                          | 1         | 1450     | FALSE   | ncbi_filtered | 156979  |
| EU434478_1_1481               | 157076 | EU434478        | Trichococcus collinsii strain b279 16S ribosomal RNA gene, partial sequence                            | 3-Jun-09      | 4-Jan-18      | 1       |            |                               | Trichococcus collinsii           | 1481   | 0           | b279                         | genomic DNA |         | receiving river of the antibiotic production wastewater effluent         | 1         | 1481     | FALSE   | ncbi_filtered | 157076  |
| EU434507_1_1482               | 157076 | EU434507        | Trichococcus collinsii strain b354 16S ribosomal RNA gene, partial sequence                            | 3-Jun-09      | 4-Jan-18      | 1       |            |                               | Trichococcus collinsii           | 1482   | 0           | b354                         | genomic DNA |         | receiving river of the antibiotic production wastewater effluent         | 1         | 1482     | FALSE   | ncbi_filtered | 157076  |
| EU434551_1_1480               | 157076 | EU434551        | Trichococcus collinsii strain b140 16S ribosomal RNA gene, partial sequence                            | 3-Jun-09      | 4-Jan-18      | 1       |            |                               | Trichococcus collinsii           | 1480   | 0           | b140                         | genomic DNA |         | receiving river of the antibiotic production wastewater effluent         | 1         | 1480     | FALSE   | ncbi_filtered | 157076  |
| KR857429_1_1439               | 157076 | KR857429        | Trichococcus collinsii strain WN-1503 16S ribosomal RNA gene, partial sequence                         | 7-Feb-17      | 4-Jan-18      | 1       |            |                               | Trichococcus collinsii           | 1439   | 0           | WN-1503                      | genomic DNA |         | Siberian permafrost                                                      | 1         | 1439     | FALSE   | ncbi_filtered | 157076  |
| NR_042061_1_1520              | 157076 | NR_042061       | Trichococcus collinsii strain 37AN3 16S ribosomal RNA, partial sequence                                | 24-Oct-17     | 4-Jan-18      | 1       |            | RefSeq                        | Trichococcus collinsii           | 1420   | 0           | 37AN3                        | rRNA        |         |                                                                          | 1         | 1520     | TRUE    | ncbi_filtered | 157076  |
| AB735688_1_1201               | 157227 | AB735688        | Jeotgalicoccus halotolerans gene for 16S rRNA, partial sequence, strain: NCCP-717                      | 24-Jul-12     | 4-Jan-18      | 1       |            |                               | Jeotgalicoccus halotolerans      | 1201   | 0           | NCCP-717                     | genomic DNA |         | salt mines soil sample                                                   | 1         | 1201     | FALSE   | ncbi_filtered | 157227  |
| EF154260_1_1427               | 157227 | EF154260        | Jeotgalicoccus halotolerans 16S ribosomal RNA gene, partial sequence                                   | 11-Jan-07     | 4-Jan-18      | 1       |            |                               | Jeotgalicoccus halotolerans      | 1427   | 0           | 20                           | genomic DNA |         | soil                                                                     | 1         | 1427     | FALSE   | ncbi_filtered | 157227  |
| JN713516_1_1508               | 157227 | JN713516        | Jeotgalicoccus halotolerans canine oral taxon 347 clone 10085 16S ribosomal RNA gene, partial sequence | 9-May-12      | 4-Jan-18      | 1       |            | ENV                           | Jeotgalicoccus halotolerans      | 1508   | 0           |                              | genomic DNA |         | oral cavity subgingival plaque                                           | 1         | 1508     | FALSE   | ncbi_filtered | 157227  |
| KF624727_1_1379               | 157227 | KF624727        | Jeotgalicoccus halotolerans voucher RIFA 1085 16S ribosomal RNA gene, partial sequence                 | 31-Oct-14     | 4-Jan-18      | 1       |            |                               | Jeotgalicoccus halotolerans      | 1379   | 1           |                              | genomic DNA |         | ant interior                                                             | 1         | 1379     | FALSE   | ncbi_filtered | 157227  |
| NR_025643_1_1506              | 157227 | NR_025643       | Jeotgalicoccus halotolerans strain YG-101 16S ribosomal RNA gene, partial sequence                     | 3-Feb-15      | 4-Jan-18      | 1       |            | RefSeq                        | Jeotgalicoccus halotolerans      | 1506   | 0           | YG-101; JCM 11198            | rRNA        |         | jeotgal, Korean fermented seafood                                        | 1         | 1506     | TRUE    | ncbi_filtered | 157227  |
| GU561362_1_1402               | 157687 | GU561362        | Leptotrichia wadei strain AGU20 16S ribosomal RNA gene, partial sequence                               | 13-Mar-10     | 4-Jan-18      | 1       |            |                               | Leptotrichia wadei               | 1402   | 0           | AGU20                        | genomic DNA |         | oral cavity                                                              | 1         | 1402     | FALSE   | ncbi_filtered | 157687  |
| KO96288_1_1434                | 157687 | KO96288         | Leptotrichia wadei culture-collection KCOM.2585 16S ribosomal RNA gene, partial sequence               | 26-Dec-16     | 4-Jan-18      | 1       |            |                               | Leptotrichia wadei               | 1434   | 0           | ChDC PV-A27                  | genomic DNA |         | gingivitis subgingival dental plaque                                     | 1         | 1434     | FALSE   | ncbi_filtered | 157687  |
| NR_113229_1_1473              | 157687 | NR_113229       | Leptotrichia wadei strain JCM 16777 16S ribosomal RNA gene, partial sequence                           | 3-Feb-15      | 4-Jan-18      | 1       |            | RefSeq                        | Leptotrichia wadei               | 1473   | 0           | JCM 16777                    | rRNA        |         |                                                                          | 1         | 1473     | TRUE    | ncbi_filtered | 157687  |
| NZ_K1271377_195_1716          | 888055 | NZ_K1271377     | Leptotrichia wadei F0279 Scaffold206, whole genome shotgun sequence                                    | 9-Apr-17      | 4-Jan-18      | 1       |            | WGS;HIGH_QUALITY_DRAFT;RefSeq | Leptotrichia wadei F0279         | 1522   | 0           | F0279                        | genomic DNA |         | supragingival plaque biofilm of a molar</                                |           |          |         |               |         |

| seqname                     | tax_id  | accession       | description                                                                                 | modified_date | download_date | version_num | source                                                | keywords   | organism                            | length | ambig_count | strain                 | mol_type    | isolate                                                                  | isolation_source                                | seq_start | seq_stop | is_type | collection    | species |
|-----------------------------|---------|-----------------|---------------------------------------------------------------------------------------------|---------------|---------------|-------------|-------------------------------------------------------|------------|-------------------------------------|--------|-------------|------------------------|-------------|--------------------------------------------------------------------------|-------------------------------------------------|-----------|----------|---------|---------------|---------|
| NZ_ADAO01000110_143_1663    | 596323  | NZ_ADAO01000110 | Leptotrichia goodfellowii F024 contig00180, whole genome shotgun sequence                   | 15-Nov-17     | 4-Jan-18      | 1           | Leptotrichia goodfellowii F024                        | WGS,RefSeq | Leptotrichia goodfellowii F024      | 1521   | 0           | F024                   | genomic DNA |                                                                          | human oral cavity                               | 143       | 1663     | FALSE   | ncbi_filtered | 157692  |
| AY151394_1_1418             | 158500  | AY151394        | Novosphingobium subarcticum 16S ribosomal RNA gene, partial sequence                        | 24-Nov-02     | 4-Jan-18      | 1           | Novosphingobium resinovorum                           |            | Novosphingobium resinovorum         | 1418   | 0           |                        | genomic DNA | LH128                                                                    | PAH-contaminated soil                           | 1         | 1418     | FALSE   | ncbi_filtered | 158500  |
| AY167828_1_1293             | 158500  | AY167828        | Novosphingobium resinovorum strain SAFR-035 16S ribosomal RNA gene, partial sequence        | 9-Feb-09      | 4-Jan-18      | 1           | Novosphingobium resinovorum (Sphingomonas subarctica) |            | Novosphingobium resinovorum         | 1293   | 0           | SAFR-035               | genomic DNA |                                                                          |                                                 | 1         | 1293     | FALSE   | ncbi_filtered | 158500  |
| JN626035_1_1385             | 158500  | JN626035        | Novosphingobium resinovorum 16S ribosomal RNA gene, partial sequence                        | 24-Jan-12     | 4-Jan-18      | 1           | Novosphingobium resinovorum                           |            | Novosphingobium resinovorum         | 1380   | 0           | B6                     | genomic DNA |                                                                          | root                                            | 1         | 1380     | FALSE   | ncbi_filtered | 158500  |
| KJ305726_1_1367             | 158500  | KJ305726        | Novosphingobium resinovorum strain CSB-49 16S ribosomal RNA gene, partial sequence          | 29-Jan-16     | 4-Jan-18      | 1           | Novosphingobium resinovorum                           |            | Novosphingobium resinovorum         | 1367   | 0           | CSB-49                 | genomic DNA |                                                                          | peanut nodules                                  | 1         | 1367     | FALSE   | ncbi_filtered | 158500  |
| NZ_CP017075_3122333_3123827 | 158500  | NZ_CP017075     | Novosphingobium resinovorum strain SA1, complete genome                                     | 13-Apr-17     | 4-Jan-18      | 1           | Novosphingobium resinovorum (Sphingomonas subarctica) | RefSeq     | Novosphingobium resinovorum         | 1455   | 0           | SA1                    | genomic DNA |                                                                          | soil                                            | 3122333   | 3123827  | FALSE   | ncbi_filtered | 158500  |
| FF90889_1_1451              | 158836  | FF90889         | Enterobacter hormaechei strain M.D.NAS-9 16S ribosomal RNA gene, partial sequence           | 28-Mar-11     | 4-Jan-18      | 1           | Enterobacter hormaechei                               |            | Enterobacter hormaechei             | 1451   | 0           | M.D.NAS-9              | genomic DNA |                                                                          | intestine                                       | 1         | 1451     | FALSE   | ncbi_filtered | 158836  |
| KF224906_1_1385             | 158836  | KF224906        | Enterobacter hormaechei strain BC83 16S ribosomal RNA gene, partial sequence                | 14-Aug-13     | 4-Jan-18      | 1           | Enterobacter hormaechei                               |            | Enterobacter hormaechei             | 1385   | 0           | BC83                   | genomic DNA |                                                                          | gut                                             | 1         | 1385     | FALSE   | ncbi_filtered | 158836  |
| KF836497_1_1405             | 158836  | KF836497        | Enterobacter hormaechei strain SPP-10 16S ribosomal RNA gene, partial sequence              | 8-Feb-14      | 4-Jan-18      | 1           | Enterobacter hormaechei                               |            | Enterobacter hormaechei             | 1405   | 0           | SPP-10                 | genomic DNA |                                                                          | soil                                            | 1         | 1405     | FALSE   | ncbi_filtered | 158836  |
| KT215540_1_1447             | 158836  | KT215540        | Enterobacter hormaechei strain Ao18 16S ribosomal RNA gene, partial sequence                | 11-Jul-15     | 4-Jan-18      | 1           | Enterobacter hormaechei                               |            | Enterobacter hormaechei             | 1447   | 0           | Ao18                   | genomic DNA |                                                                          | ascidian                                        | 1         | 1447     | FALSE   | ncbi_filtered | 158836  |
| KT260335_1_1380             | 158836  | KT260335        | Enterobacter hormaechei strain RC8123 16S ribosomal RNA gene, partial sequence              | 19-Sep-15     | 4-Jan-18      | 1           | Enterobacter hormaechei                               |            | Enterobacter hormaechei             | 1380   | 3           | RC8123                 | genomic DNA |                                                                          | bat guano                                       | 1         | 1380     | FALSE   | ncbi_filtered | 158836  |
| JF778672_1_1429             | 158897  | JF778672        | Arthrobacter scleromae strain ARB3 16S ribosomal RNA gene, partial sequence                 | 4-May-11      | 4-Jan-18      | 1           | Pseudarthrobacter scleromae                           |            | Pseudarthrobacter scleromae         | 1429   | 0           | ARB3                   | genomic DNA |                                                                          | permafrost samples from Qinghai-Tibet Plateau   | 1         | 1429     | FALSE   | ncbi_filtered | 158897  |
| KF424307_1_1432             | 158897  | KF424307        | Arthrobacter scleromae strain OB149 16S ribosomal RNA gene, partial sequence                | 31-Jul-13     | 4-Jan-18      | 1           | Pseudarthrobacter scleromae                           |            | Pseudarthrobacter scleromae         | 1432   | 0           | OB149                  | genomic DNA |                                                                          | agricultural field frozen soil in winter        | 1         | 1432     | FALSE   | ncbi_filtered | 158897  |
| KF923416_1_1424             | 158897  | KF923416        | Arthrobacter scleromae strain 6 16S ribosomal RNA gene, partial sequence                    | 19-Mar-14     | 4-Jan-18      | 1           | Pseudarthrobacter scleromae                           |            | Pseudarthrobacter scleromae         | 1424   | 0           | 6                      | genomic DNA |                                                                          | permafrost soils                                | 1         | 1424     | FALSE   | ncbi_filtered | 158897  |
| KU009473_1_1430             | 158897  | KU009473        | Arthrobacter scleromae strain 2.5j-2-1-6-T 16S ribosomal RNA gene, partial sequence         | 23-Mar-14     | 4-Jan-18      | 1           | Pseudarthrobacter scleromae                           |            | Pseudarthrobacter scleromae         | 1430   | 0           | 2.5j-2-1-6-T           | genomic DNA |                                                                          | rhizosphere soil of plant in tidal flat         | 1         | 1430     | FALSE   | ncbi_filtered | 158897  |
| KM874394_1_1402             | 158897  | KM874394        | Pseudarthrobacter scleromae strain CEZ1 16S ribosomal RNA gene, partial sequence            | 1-Aug-17      | 4-Jan-18      | 1           | Pseudarthrobacter scleromae                           |            | Pseudarthrobacter scleromae         | 1402   | 0           | CEZ1                   | genomic DNA |                                                                          | root                                            | 1         | 1402     | FALSE   | ncbi_filtered | 158897  |
| L79909_1_1522               | 159836  | L79909          | Megasphaera hominis 16S ribosomal RNA gene, partial sequence                                | 26-Apr-04     | 4-Jan-18      | 1           | Megasphaera hominis                                   |            | Megasphaera hominis                 | 1522   | 10          |                        | genomic DNA |                                                                          |                                                 | 1         | 1522     | FALSE   | ncbi_filtered | 159836  |
| HG934371_1_1445             | 160386  | HG934371        | Corynebacterium casei partial 16S rRNA gene, isolate M3_110                                 | 23-Sep-14     | 4-Jan-18      | 1           | Corynebacterium casei                                 |            | Corynebacterium casei               | 1445   | 0           |                        | genomic DNA | M3_110                                                                   | raw milk                                        | 1         | 1445     | FALSE   | ncbi_filtered | 160386  |
| KF817680_1_1404             | 160386  | KF817680        | Corynebacterium casei strain AM-68 16S ribosomal RNA gene, partial sequence                 | 27-Jan-14     | 4-Jan-18      | 1           | Corynebacterium casei                                 |            | Corynebacterium casei               | 1404   | 0           | AM-68                  | genomic DNA |                                                                          |                                                 | 1         | 1404     | FALSE   | ncbi_filtered | 160386  |
| NR_025101_1_1343            | 1285583 | NR_025101       | Corynebacterium casei strain LMG 5-19264 16S ribosomal RNA gene, partial sequence           | 3-Feb-15      | 4-Jan-18      | 1           | Corynebacterium casei                                 | RefSeq     | Corynebacterium casei LMG 5-19264   | 1343   | 5           | LMG 5-19264            | rRNA        |                                                                          |                                                 | 1         | 1343     | TRUE    | ncbi_filtered | 160386  |
| NZ_CP004350_1680407_1681938 | 1285583 | NZ_CP004350     | Corynebacterium casei LMG 5-19264, complete genome                                          | 9-Apr-17      | 4-Jan-18      | 1           | Corynebacterium casei                                 | RefSeq     | Corynebacterium casei LMG 5-19264   | 1532   | 0           | LMG 5-19264            | genomic DNA |                                                                          |                                                 | 1680407   | 1681938  | TRUE    | ncbi_filtered | 160386  |
| NZ_CP004350_2249908_2251441 | 1285583 | NZ_CP004350     | Corynebacterium casei LMG 5-19264, complete genome                                          | 9-Apr-17      | 4-Jan-18      | 1           | Corynebacterium casei                                 | RefSeq     | Corynebacterium casei LMG 5-19264   | 1534   | 0           | LMG 5-19264            | genomic DNA |                                                                          |                                                 | 2249908   | 2251441  | TRUE    | ncbi_filtered | 160386  |
| EU739070_1_1387             | 160791  | EU739070        | Sphingomonas wittichii strain 160 16S ribosomal RNA gene, partial sequence                  | 10-Mar-09     | 4-Jan-18      | 1           | Sphingomonas wittichii                                |            | Sphingomonas wittichii              | 1387   | 1           | 160                    | genomic DNA |                                                                          |                                                 | 1         | 1387     | TRUE    | ncbi_filtered | 160791  |
| JF459963_1_1375             | 160791  | JF459963        | Sphingomonas wittichii strain DBDR28 16S ribosomal RNA gene, partial sequence               | 12-Mar-13     | 4-Jan-18      | 1           | Sphingomonas wittichii                                |            | Sphingomonas wittichii              | 1375   | 0           | DBDR28                 | genomic DNA |                                                                          | dental chair cup filler                         | 1         | 1375     | FALSE   | ncbi_filtered | 160791  |
| JG979137_1_1409             | 392499  | JG979137        | Sphingomonas wittichii strain H7 16S ribosomal RNA gene, partial sequence                   | 18-Dec-12     | 4-Jan-18      | 1           | Sphingomonas wittichii RW1                            |            | Sphingomonas wittichii RW1          | 1409   | 0           | H7                     | genomic DNA |                                                                          | soil                                            | 1         | 1409     | FALSE   | ncbi_filtered | 160791  |
| KP979540_1_1337             | 160791  | KP979540        | Sphingomonas wittichii 16S ribosomal RNA gene, partial sequence                             | 27-Jul-15     | 4-Jan-18      | 1           | Sphingomonas wittichii                                |            | Sphingomonas wittichii              | 1337   | 0           | HX9                    | genomic DNA |                                                                          | river water                                     | 1         | 1337     | FALSE   | ncbi_filtered | 160791  |
| NC_009511_3844815_3846309   | 392499  | NC_009511       | Sphingomonas wittichii RW1, complete genome                                                 | 19-May-17     | 4-Jan-18      | 1           | Sphingomonas wittichii RW1                            | RefSeq     | Sphingomonas wittichii RW1          | 1495   | 0           | RW1                    | genomic DNA |                                                                          |                                                 | 3844815   | 3846309  | TRUE    | ncbi_filtered | 160791  |
| JF915327_1_1375             | 160825  | JF915327        | Comamonas korensis strain NW15 16S ribosomal RNA gene, partial sequence                     | 20-Jun-11     | 4-Jan-18      | 1           | Comamonas korensis                                    |            | Comamonas korensis                  | 1375   | 0           | NW15                   | genomic DNA |                                                                          |                                                 | 1         | 1375     | FALSE   | ncbi_filtered | 160825  |
| KF475801_1_1479             | 160825  | KF475801        | Comamonas korensis strain IHB B 1392 16S ribosomal RNA gene, partial sequence               | 14-Aug-13     | 4-Jan-18      | 1           | Comamonas korensis                                    |            | Comamonas korensis                  | 1479   | 0           | IHB B 1392             | genomic DNA |                                                                          | Pisum sativum rhizosphere soil                  | 1         | 1479     | FALSE   | ncbi_filtered | 160825  |
| KJ781876_1_1417             | 160825  | KJ781876        | Comamonas korensis strain B308 16S ribosomal RNA gene, partial sequence                     | 30-Apr-15     | 4-Jan-18      | 1           | Comamonas korensis                                    |            | Comamonas korensis                  | 1417   | 0           | B308                   | genomic DNA |                                                                          | invasive beetle                                 | 1         | 1417     | FALSE   | ncbi_filtered | 160825  |
| KX461916_1_1396             | 160825  | KX461916        | Comamonas korensis strain HX-8 16S ribosomal RNA gene, partial sequence                     | 13-Jul-16     | 4-Jan-18      | 1           | Comamonas korensis                                    |            | Comamonas korensis                  | 1396   | 0           | HX-8                   | genomic DNA |                                                                          |                                                 | 1         | 1396     | FALSE   | ncbi_filtered | 160825  |
| NR_025107_1_1464            | 160825  | NR_025107       | Comamonas korensis strain KCTC 12005 16S ribosomal RNA gene, partial sequence               | 3-Feb-15      | 4-Jan-18      | 1           | Comamonas korensis                                    | RefSeq     | Comamonas korensis                  | 1464   | 6           | KCTC 12005             | rRNA        |                                                                          |                                                 | 1         | 1464     | TRUE    | ncbi_filtered | 160825  |
| EU331409_1_1515             | 161493  | EU331409        | Anaeromyxobacter dehalogenans strain DCP18 16S ribosomal RNA gene, partial sequence         | 18-Mar-08     | 4-Jan-18      | 1           | Anaeromyxobacter dehalogenans                         |            | Anaeromyxobacter dehalogenans       | 1515   | 0           | DCP18                  | genomic DNA |                                                                          | 2,6-dichlorophenol enrichment agricultural soil | 1         | 1515     | FALSE   | ncbi_filtered | 161493  |
| EU331410_1_1515             | 161493  | EU331410        | Anaeromyxobacter dehalogenans strain DCP17 16S ribosomal RNA gene, partial sequence         | 18-Mar-08     | 4-Jan-18      | 1           | Anaeromyxobacter dehalogenans                         |            | Anaeromyxobacter dehalogenans       | 1515   | 0           | DCP17                  | genomic DNA |                                                                          | 2,6-dichlorophenol enrichment agricultural soil | 1         | 1515     | FALSE   | ncbi_filtered | 161493  |
| FJ190052_1_1507             | 161493  | FJ190052        | Anaeromyxobacter dehalogenans strain FRC-D6 16S ribosomal RNA gene, partial sequence        | 28-May-09     | 4-Jan-18      | 1           | Anaeromyxobacter dehalogenans                         |            | Anaeromyxobacter dehalogenans       | 1507   | 1           | FRC-D6                 | genomic DNA |                                                                          | uranium-contaminated site materials             | 1         | 1507     | FALSE   | ncbi_filtered | 161493  |
| FJ190056_1_1459             | 161493  | FJ190056        | Anaeromyxobacter dehalogenans strain FRC-R4 16S ribosomal RNA gene, partial sequence        | 28-May-09     | 4-Jan-18      | 1           | Anaeromyxobacter dehalogenans                         |            | Anaeromyxobacter dehalogenans       | 1459   | 6           | FRC-R4                 | genomic DNA |                                                                          | uranium-contaminated site materials             | 1         | 1459     | FALSE   | ncbi_filtered | 161493  |
| NC_011891_1495545_1497102   | 455488  | NC_011891       | Anaeromyxobacter dehalogenans 2CP-1, complete genome                                        | 18-May-17     | 4-Jan-18      | 1           | Anaeromyxobacter dehalogenans 2CP-1                   | RefSeq     | Anaeromyxobacter dehalogenans 2CP-1 | 1558   | 0           | 2CP-1                  | genomic DNA |                                                                          |                                                 | 1495545   | 1497102  | TRUE    | ncbi_filtered | 161493  |
| AF537598_1_1470             | 161879  | AF537598        | Corynebacterium kroppenstedtii isolate 00-0244 16S ribosomal RNA gene, partial sequence     | 31-Oct-02     | 4-Jan-18      | 1           | Corynebacterium kroppenstedtii                        |            | Corynebacterium kroppenstedtii      | 1470   | 0           |                        | genomic DNA | National Microbiology Laboratory Special Bacteriology Identifier 00-0244 | blood culture                                   | 1         | 1470     | FALSE   | ncbi_filtered | 161879  |
| AY524775_1_1444             | 161879  | AY524775        | Corynebacterium kroppenstedtii isolate BK5689_2003 16S ribosomal RNA gene, partial sequence | 7-Feb-04      | 4-Jan-18      | 1           | Corynebacterium kroppenstedtii                        |            | Corynebacterium kroppenstedtii      | 1444   | 1           |                        | genomic DNA | BK5689_2003                                                              | blood culture                                   | 1         | 1444     | FALSE   | ncbi_filtered | 161879  |
| KP230546_1_1328             | 161879  | KP230546        | Corynebacterium kroppenstedtii strain CNM632-14 16S ribosomal RNA gene, partial sequence    | 10-Feb-15     | 4-Jan-18      | 1           | Corynebacterium kroppenstedtii                        |            | Corynebacterium kroppenstedtii      | 1328   | 8           | CNM632-14              | genomic DNA |                                                                          | breast abscess                                  | 1         | 1328     | FALSE   | ncbi_filtered | 161879  |
| KT347607_1_1445             | 161879  | KT347607        | Corynebacterium kroppenstedtii strain VAS601_15 16S ribosomal RNA gene, partial sequence    | 7-Oct-15      | 4-Jan-18      | 1           | Corynebacterium kroppenstedtii                        |            | Corynebacterium kroppenstedtii      | 1445   | 0           | VAS601_15              | genomic DNA |                                                                          |                                                 | 1         | 1445     | FALSE   | ncbi_filtered | 161879  |
| NZ_JYCR01000027_29_1559     | 161879  | NZ_JYCR01000027 | Corynebacterium kroppenstedtii strain ITA105 rep_c27, whole genome shotgun sequence         | 10-Apr-17     | 4-Jan-18      | 1           | Corynebacterium kroppenstedtii                        | WGS,RefSeq | Corynebacterium kroppenstedtii      | 1531   | 0           | ITA105                 | genomic DNA |                                                                          | clinical swab from women's breast               | 29        | 1559     | FALSE   | ncbi_filtered | 161879  |
| JG659352_1_1372             | 161899  | JG659352        | Corynebacterium singulare strain L4-295 16S ribosomal RNA gene, partial sequence            | 23-Dec-15     | 4-Jan-18      | 1           | Corynebacterium singulare                             |            | Corynebacterium singulare           | 1372   | 1           | L4-295                 | genomic DNA |                                                                          | plant tissue                                    | 1         | 1372     | FALSE   | ncbi_filtered | 161899  |
| NR_026394_1_1323            | 161899  | NR_026394       | Corynebacterium singulare strain IBS B52218 16S ribosomal RNA gene, partial sequence        | 3-Feb-15      | 4-Jan-18      | 1           | Corynebacterium singulare                             | RefSeq     | Corynebacterium singulare           | 1323   | 2           | IBS B52218; CCGU 37330 | rRNA        |                                                                          |                                                 | 1         | 1323     | TRUE    | ncbi_filtered | 161899  |
| NZ_CP010827_2321328_2322856 | 161899  | NZ_CP010827     | Corynebacterium singulare strain IBS B52218, complete genome                                | 17-Apr-17     | 4-Jan-18      | 1           | Corynebacterium singulare                             | RefSeq     | Corynebacterium singulare           | 1529   | 0           | IBS B52218             | genomic DNA |                                                                          | semen                                           | 2321328   | 2322856  | TRUE    | ncbi_filtered | 161899  |
| NZ_CP010827_2706456_2706185 | 161899  | NZ_CP010827     | Corynebacterium singulare strain IBS B52218, complete genome                                | 17-Apr-17     | 4-Jan-18      | 1           | Corynebacterium singulare                             | RefSeq     | Corynebacterium singulare           | 1530   | 0           | IBS B52218             | genomic DNA |                                                                          | semen                                           | 2706456   | 2706185  | TRUE    | ncbi_filtered | 161899  |
| AF537605_1_1445             | 161902  | AF537605        | Corynebacterium sundsvallense isolate 93-0639 16S ribosomal RNA gene, partial sequence      | 31-Oct-02     | 4-Jan-18      | 1           | Corynebacterium sundsvallense                         |            | Corynebacterium sundsvallense       | 1445   | 0           |                        | genomic DNA | National Microbiology Laboratory Special Bacteriology Identifier 93-0639 | chronic draining sinus                          | 1         | 1445     | FALSE   | ncbi_filtered | 161902  |
| AF537606_1_1467             | 161902  | AF537606        | Corynebacterium sundsvallense isolate 99-0121 16S ribosomal RNA gene, partial sequence      | 31-Oct-02     | 4-Jan-18      | 1           | Corynebacterium sundsvallense                         |            | Corynebacterium sundsvallense       | 1467   | 1           |                        | genomic DNA | National Microbiology Laboratory Special Bacteriology Identifier 99-0121 | blood culture                                   | 1         | 1467     | FALSE   | ncbi_filtered | 161902  |
| NR_026375_1_1468            | 161902  | NR_026375       | Corynebacterium sundsvallense strain CCG 36622 16S ribosomal RNA gene, partial sequence     | 3-Feb-15      | 4-Jan-18      | 1           | Corynebacterium sundsvallense                         | RefSeq     | Corynebacterium sundsvallense       | 1468   | 0           | CCG 36622              | rRNA        |                                                                          |                                                 | 1         | 1468     | TRUE    | ncbi_filtered | 161902  |
| NR_028951_1_1470            | 161902  | NR_028951       | Corynebacterium appendicis strain HAMB B-3491 16S ribosomal RNA gene, partial sequence      | 3-Feb-15      | 4-Jan-18      | 1           | Corynebacterium appendicis                            | RefSeq     | Coryneb                             |        |             |                        |             |                                                                          |                                                 |           |          |         |               |         |

| seqname                     | tax_id  | accession       | description                                                                                             | modified_date | download_date | version_num | source                                  | keywords                        | organism                                | length | ambig_count | strain                 | mol_type    | isolate | isolation_source                                                           | seq_start | seq_stop | is_type | collection    | species       |        |
|-----------------------------|---------|-----------------|---------------------------------------------------------------------------------------------------------|---------------|---------------|-------------|-----------------------------------------|---------------------------------|-----------------------------------------|--------|-------------|------------------------|-------------|---------|----------------------------------------------------------------------------|-----------|----------|---------|---------------|---------------|--------|
| KR181949_1_1354             | 165758  | KR181949        | Streptococcus gallinaceus strain S5255 16S ribosomal RNA gene, partial sequence                         | 1-Nov-15      | 4-Jan-18      | 1           | Streptococcus gallinaceus               |                                 | Streptococcus gallinaceus               | 1354   | 3           | S5255                  | genomic DNA |         |                                                                            | 1         | 1354     | FALSE   | ncbi_filtered | 165758        |        |
| NR_025453_1_1502            | 165758  | NR_025453       | Streptococcus gallinaceus strain CCUG 42692 16S ribosomal RNA gene, partial sequence                    | 3-Feb-15      | 4-Jan-18      | 1           | Streptococcus gallinaceus               | RefSeq                          | Streptococcus gallinaceus               | 1502   | 0           | CCUG 42692             | rRNA        |         | chickens with septicaemia                                                  | 1         | 1502     | TRUE    | ncbi_filtered | 165758        |        |
| AF220220_1_1437             | 548476  | AF220220        | Corynebacterium aurimucosum strain CN-1 16S ribosomal RNA gene, partial sequence                        | 26-Mar-07     | 4-Jan-18      | 1           | Corynebacterium aurimucosum ATCC 700975 |                                 | Corynebacterium aurimucosum ATCC 700975 | 1437   | 0           | CN-1                   | genomic DNA |         | female urogenital tract                                                    | 1         | 1437     | FALSE   | ncbi_filtered | 169292        |        |
| NC_012590_2332083_2333611   | 548476  | NC_012590       | Corynebacterium aurimucosum ATCC 700975, complete genome                                                | 10-Apr-17     | 4-Jan-18      | 1           | Corynebacterium aurimucosum ATCC 700975 | RefSeq                          | Corynebacterium aurimucosum ATCC 700975 | 1439   | 0           | DSM 44827; ATCC 700975 | genomic DNA |         |                                                                            | 2332083   | 2333611  | FALSE   | ncbi_filtered | 169292        |        |
| NR_115262_1_1476            | 169292  | NR_115262       | Corynebacterium aurimucosum strain H2456 16S ribosomal RNA gene, partial sequence                       | 3-Feb-15      | 4-Jan-18      | 1           | Corynebacterium aurimucosum             | RefSeq                          | Corynebacterium aurimucosum             | 1476   | 0           | H2456                  | rRNA        |         |                                                                            | 1         | 1476     | TRUE    | ncbi_filtered | 169292        |        |
| NZ_LJMN01000134_1_1530      | 169292  | NZ_LJMN01000134 | Corynebacterium aurimucosum strain 945_CAUR 742_1522_112713_709_581_730_ whole genome shotgun sequence  | 3-Apr-17      | 4-Jan-18      | 1           | Corynebacterium aurimucosum             | WGS,RefSeq                      | Corynebacterium aurimucosum             | 1529   | 0           | 945_CAUR               | genomic DNA |         |                                                                            |           | 2        | 1530    | FALSE         | ncbi_filtered | 169292 |
| PNH01000033_658_2185        | 169292  | PNH01000033     | Corynebacterium aurimucosum strain UMB1300 ER1203643.17957_1_55.33, whole genome shotgun sequence       | 10-Jan-18     | 12-Jan-18     | 1           | Corynebacterium aurimucosum             | WGS                             | Corynebacterium aurimucosum             | 1528   | 0           | UMB1300                | genomic DNA |         | catheter                                                                   | 658       | 2185     | FALSE   | ncbi_filtered | 169292        |        |
| FR682692_1_1482             | 169480  | FR682692        | Rothia amarae partial 16S rRNA gene, strain R-36507                                                     | 14-Oct-10     | 4-Jan-18      | 1           | Rothia amarae                           |                                 | Rothia amarae                           | 1482   | 1           | R-36507                | genomic DNA |         | soil sample B850                                                           | 1         | 1482     | FALSE   | ncbi_filtered | 169480        |        |
| FR884426_1_1426             | 169480  | FR884426        | Rothia amarae partial 16S rRNA gene, strain O1410AR15M_5                                                | 4-Sep-11      | 4-Jan-18      | 1           | Rothia amarae                           |                                 | Rothia amarae                           | 1426   | 0           | O1410AR15M_5           | genomic DNA |         | air from a cave                                                            | 1         | 1426     | FALSE   | ncbi_filtered | 169480        |        |
| LT600554_1_1372             | 169480  | LT600554        | Rothia amarae partial 16S rRNA gene, strain S226                                                        | 10-Aug-16     | 4-Jan-18      | 1           | Rothia amarae                           |                                 | Rothia amarae                           | 1372   | 0           | S226                   | genomic DNA |         | sea water                                                                  | 1         | 1372     | FALSE   | ncbi_filtered | 169480        |        |
| MG905369_1_1419             | 169480  | MG905369        | Rothia amarae strain HMB110 16S ribosomal RNA gene, partial sequence                                    | 12-Feb-18     | 4-Jan-18      | 1           | Rothia amarae                           |                                 | Rothia amarae                           | 1419   | 0           | HMB110                 | genomic DNA |         |                                                                            | 1         | 1419     | FALSE   | ncbi_filtered | 169480        |        |
| NR_029045_1_1467            | 169480  | NR_029045       | Rothia amarae strain J18 16S ribosomal RNA gene, partial sequence                                       | 3-Feb-15      | 4-Jan-18      | 1           | Rothia amarae                           | RefSeq                          | Rothia amarae                           | 1467   | 0           | J18; JCM 11375         | rRNA        |         |                                                                            | 1         | 1467     | TRUE    | ncbi_filtered | 169480        |        |
| KT199298_1_1513             | 170573  | KT199298        | Staphylococcus pettenkoferi strain 461 16S ribosomal RNA gene, partial sequence                         | 25-Nov-15     | 4-Jan-18      | 1           | Staphylococcus pettenkoferi             |                                 | Staphylococcus pettenkoferi             | 1513   | 0           | 461                    | genomic DNA |         |                                                                            | 1         | 1513     | FALSE   | ncbi_filtered | 170573        |        |
| KT720156_1_1428             | 170573  | KT720156        | Staphylococcus pettenkoferi strain GF_1.2 16S ribosomal RNA gene, partial sequence                      | 28-Nov-15     | 4-Jan-18      | 1           | Staphylococcus pettenkoferi             |                                 | Staphylococcus pettenkoferi             | 1428   | 3           | GF_1.2                 | genomic DNA |         | Phoenix Faring spacecrafts surfaces                                        | 1         | 1428     | FALSE   | ncbi_filtered | 170573        |        |
| KV622824_1_1203             | 170573  | KV622824        | Staphylococcus pettenkoferi strain OA202 16S ribosomal RNA gene, partial sequence                       | 21-Feb-18     | 27-Feb-18     | 1           | Staphylococcus pettenkoferi             |                                 | Staphylococcus pettenkoferi             | 1203   | 0           | OA202                  | genomic DNA |         | spacecraft and associated surfaces                                         | 1         | 1203     | FALSE   | ncbi_filtered | 170573        |        |
| NZ_JVAY10000030_7_1565      | 170573  | NZ_JVAY10000030 | Staphylococcus pettenkoferi strain 589_SHA_E 282_4878_430623_228_..._259_ whole genome shotgun sequence | 10-Apr-17     | 4-Jan-18      | 1           | Staphylococcus pettenkoferi             | WGS,RefSeq                      | Staphylococcus pettenkoferi             | 1559   | 0           | 589_SHA_E              | genomic DNA |         |                                                                            | 7         | 1565     | FALSE   | ncbi_filtered | 170573        |        |
| EU086796_1_1444             | 170994  | EU086796        | Brevibacterium paucivorans strain 28 16S ribosomal RNA gene, partial sequence                           | 4-Nov-13      | 4-Jan-18      | 1           | Brevibacterium paucivorans              |                                 | Brevibacterium paucivorans              | 1444   | 0           | 28                     | genomic DNA |         |                                                                            | 1         | 1444     | FALSE   | ncbi_filtered | 170994        |        |
| NR_025375_1_1412            | 170994  | NR_025375       | Brevibacterium paucivorans strain CF 62 16S ribosomal RNA gene, partial sequence                        | 3-Feb-15      | 4-Jan-18      | 1           | Brevibacterium paucivorans              | RefSeq                          | Brevibacterium paucivorans              | 1412   | 1           | CF 62; DSM 13657       | rRNA        |         |                                                                            | 1         | 1412     | TRUE    | ncbi_filtered | 170994        |        |
| PNH01000008_145_1669        | 170994  | PNH01000008     | Brevibacterium paucivorans strain UMB1101 ER1203651.17957_1_63.8, whole genome shotgun sequence         | 10-Jan-18     | 12-Jan-18     | 1           | Brevibacterium paucivorans              | WGS                             | Brevibacterium paucivorans              | 1525   | 0           | UMB1101                | genomic DNA |         | catheter                                                                   | 145       | 1669     | FALSE   | ncbi_filtered | 170994        |        |
| AJ344558_1_1422             | 388085  | AJ344558        | Chroococcidiopsis cubana partial 16S rRNA gene, strain SAG 39.79                                        | 5-Jun-14      | 4-Jan-18      | 1           | Chroococcidiopsis cubana SAG 39.79      | 16S ribosomal RNA;16S rRNA gene | Chroococcidiopsis cubana SAG 39.79      | 1422   | 0           | SAG 39.79; PCC 7326    | genomic DNA |         |                                                                            | 1         | 1422     | FALSE   | ncbi_filtered | 171392        |        |
| JF810080_1_1222             | 388085  | JF810080        | Chroococcidiopsis cubana SAG 39.79 16S ribosomal RNA gene, partial sequence                             | 31-Mar-12     | 4-Jan-18      | 1           | Chroococcidiopsis cubana SAG 39.79      |                                 | Chroococcidiopsis cubana SAG 39.79      | 1222   | 0           | SAG 39.79              | genomic DNA |         |                                                                            | 1         | 1222     | FALSE   | ncbi_filtered | 171392        |        |
| KT18864_1_1404              | 172040  | KT18864         | Arthro bacter ruscicus strain IIF45W-B4 16S ribosomal RNA gene, partial sequence                        | 27-Nov-16     | 4-Jan-18      | 1           | Arthro bacter ruscicus                  |                                 | Arthro bacter ruscicus                  | 1404   | 0           | IIF45W-B4              | genomic DNA |         |                                                                            | 1         | 1404     | FALSE   | ncbi_filtered | 172040        |        |
| MG946228_1_1508             | 172040  | MG946228        | Arthro bacter ruscicus strain DSM 14555 16S ribosomal RNA gene, partial sequence                        | 18-Feb-18     | 27-Feb-18     | 1           | Arthro bacter ruscicus                  |                                 | Arthro bacter ruscicus                  | 1508   | 0           | DSM 14555              | genomic DNA |         | acquired from DSMZ (German Collection of Microorganisms and Cell Cultures) | 1         | 1508     | TRUE    | ncbi_filtered | 172040        |        |
| NR_024783_1_1341            | 172040  | NR_024783       | Arthro bacter ruscicus strain A1-3 16S ribosomal RNA gene, partial sequence                             | 3-Feb-15      | 4-Jan-18      | 1           | Arthro bacter ruscicus                  | RefSeq                          | Arthro bacter ruscicus                  | 1341   | 0           | A1-3; GTC 863          | rRNA        |         |                                                                            | 1         | 1341     | TRUE    | ncbi_filtered | 172040        |        |
| DQ673319_1_1399             | 172042  | DQ673319        | Rothia aerea strain SMC-A5889 16S ribosomal RNA gene, partial sequence                                  | 1-Jul-07      | 4-Jan-18      | 1           | Rothia aerea                            |                                 | Rothia aerea                            | 1399   | 0           | SMC-A5889              | genomic DNA |         |                                                                            | 1         | 1399     | FALSE   | ncbi_filtered | 172042        |        |
| MG062901_1_1381             | 172042  | MG062901        | Rothia aerea strain TROSS 16S ribosomal RNA gene, partial sequence                                      | 21-Feb-18     | 27-Feb-18     | 2           | Rothia aerea                            |                                 | Rothia aerea                            | 1381   | 0           | TROSS                  | genomic DNA |         | oral cavity                                                                | 1         | 1381     | FALSE   | ncbi_filtered | 172042        |        |
| MG062911_1_1383             | 172042  | MG062911        | Rothia aerea strain TRO181 16S ribosomal RNA gene, partial sequence                                     | 21-Feb-18     | 27-Feb-18     | 2           | Rothia aerea                            |                                 | Rothia aerea                            | 1383   | 11          | TRO181                 | genomic DNA |         | oral cavity                                                                | 1         | 1383     | FALSE   | ncbi_filtered | 172042        |        |
| MG062917_1_1374             | 172042  | MG062917        | Rothia aerea strain TRO215 16S ribosomal RNA gene, partial sequence                                     | 21-Feb-18     | 27-Feb-18     | 2           | Rothia aerea                            |                                 | Rothia aerea                            | 1374   | 8           | TRO215                 | genomic DNA |         | oral cavity                                                                | 1         | 1374     | FALSE   | ncbi_filtered | 172042        |        |
| NZ_LJQ10000002_340_1870     | 1125724 | NZ_LJQ10000002  | Rothia aerea strain F0474 contig00033, whole genome shotgun sequence                                    | 23-Nov-17     | 4-Jan-18      | 1           | Rothia aerea F0474                      | WGS,HIGH_QUALITY_DRAFT,RefSeq   | Rothia aerea F0474                      | 1531   | 0           | F0474                  | genomic DNA |         | biological product [ENVO:02000043]                                         | 340       | 1870     | FALSE   | ncbi_filtered | 172042        |        |
| GU458257_1_1397             | 172045  | GU458257        | Elizabethkingia sp. BM10 16S ribosomal RNA gene, partial sequence                                       | 18-May-10     | 4-Jan-18      | 1           | Elizabethkingia miricola                |                                 | Elizabethkingia miricola                | 1397   | 0           | BM10                   | genomic DNA |         | gut                                                                        | 1         | 1397     | FALSE   | ncbi_filtered | 172045        |        |
| KP844567_1_1509             | 172045  | KP844567        | Elizabethkingia miricola strain YMC R1459 16S ribosomal RNA gene, partial sequence                      | 14-Apr-15     | 4-Jan-18      | 1           | Elizabethkingia miricola                |                                 | Elizabethkingia miricola                | 1509   | 0           | YMC R1459              | genomic DNA |         |                                                                            | 1         | 1509     | FALSE   | ncbi_filtered | 172045        |        |
| NR_036862_1_1312            | 172045  | NR_036862       | Elizabethkingia miricola strain W3-B1 16S ribosomal RNA gene, partial sequence                          | 3-Feb-15      | 4-Jan-18      | 1           | Elizabethkingia miricola                | RefSeq                          | Elizabethkingia miricola                | 1312   | 4           | W3-B1; GTC862          | rRNA        |         |                                                                            | 1         | 1312     | TRUE    | ncbi_filtered | 172045        |        |
| NZ_CP023746_3518743_3520264 | 172045  | NZ_CP023746     | Elizabethkingia miricola strain EM798-26, complete genome                                               | 19-Oct-17     | 4-Jan-18      | 1           | Elizabethkingia miricola                | RefSeq                          | Elizabethkingia miricola                | 1522   | 0           | EM798-26               | genomic DNA |         | blood                                                                      | 3518743   | 3520264  | FALSE   | ncbi_filtered | 172045        |        |
| NZ_MAGX01000008_3829_5350   | 172045  | NZ_MAGX01000008 | Elizabethkingia miricola strain CSID_3000517120 16-186_contig_7, whole genome shotgun sequence          | 11-Mar-17     | 4-Jan-18      | 1           | Elizabethkingia miricola                | WGS,RefSeq                      | Elizabethkingia miricola                | 1522   | 0           | CSID_3000517120        | genomic DNA |         |                                                                            | 3829      | 5350     | FALSE   | ncbi_filtered | 172045        |        |
| KC493989_1_14008            | 173362  | KC493989        | Brachy bacterium paraconglomeratum strain B210-1 16S ribosomal RNA gene, partial sequence               | 7-Sep-17      | 4-Jan-18      | 1           | Brachy bacterium paraconglomeratum      |                                 | Brachy bacterium paraconglomeratum      | 1442   | 0           | B210-1                 | genomic DNA |         | soil sample from coastal wetland                                           | 1         | 1442     | FALSE   | ncbi_filtered | 173362        |        |
| KT261127_1_1265             | 173362  | KT261127        | Brachy bacterium paraconglomeratum strain RCB915 16S ribosomal RNA gene, partial sequence               | 19-Sep-15     | 4-Jan-18      | 1           | Brachy bacterium paraconglomeratum      |                                 | Brachy bacterium paraconglomeratum      | 1265   | 1           | RCB915                 | genomic DNA |         | bat guano                                                                  | 1         | 1265     | FALSE   | ncbi_filtered | 173362        |        |
| KT261130_1_1402             | 173362  | KT261130        | Brachy bacterium paraconglomeratum strain RCB918 16S ribosomal RNA gene, partial sequence               | 19-Sep-15     | 4-Jan-18      | 1           | Brachy bacterium paraconglomeratum      |                                 | Brachy bacterium paraconglomeratum      | 1402   | 0           | RCB918                 | genomic DNA |         | bat guano                                                                  | 1         | 1402     | FALSE   | ncbi_filtered | 173362        |        |
| MG896166_1_1353             | 173362  | MG896166        | Brachy bacterium paraconglomeratum strain UMTB8222 16S ribosomal RNA gene, partial sequence             | 11-Feb-18     | 14-Feb-18     | 1           | Brachy bacterium paraconglomeratum      |                                 | Brachy bacterium paraconglomeratum      | 1353   | 0           | UMTB8222               | genomic DNA |         | coral reef ecosystems                                                      | 1         | 1353     | FALSE   | ncbi_filtered | 173362        |        |
| NZ_AG5001000038_2861_4387   | 1064537 | NZ_AG5001000038 | Brachy bacterium paraconglomeratum strain LC44_rep_c82, whole genome shotgun sequence                   | 22-Nov-17     | 4-Jan-18      | 1           | Brachy bacterium paraconglomeratum LC44 | WGS,RefSeq                      | Brachy bacterium paraconglomeratum LC44 | 1527   | 0           | LC44                   | genomic DNA |         | cave community                                                             | 2861      | 4387     | FALSE   | ncbi_filtered | 173362        |        |
| NC_012489_1882855_1884386   | 179066  | NC_012489       | Gemmatimonas aurantiaca T-27 DNA, complete genome                                                       | 17-Apr-17     | 4-Jan-18      | 1           | Gemmatimonas aurantiaca T-27            | RefSeq                          | Gemmatimonas aurantiaca T-27            | 1532   | 0           | T-27                   | genomic DNA |         | activated sludge for phosphorus removal                                    | 1882855   | 1884386  | TRUE    | ncbi_filtered | 173480        |        |
| EF371928_1_1490             | 176090  | EF371928        | Streptococcus sinensis strain HDP 2005-0155 16S ribosomal RNA gene, partial sequence                    | 19-Mar-08     | 4-Jan-18      | 1           | Streptococcus sinensis                  |                                 | Streptococcus sinensis                  | 1490   | 0           | HDP 2005-0155          | genomic DNA |         |                                                                            | 1         | 1490     | FALSE   | ncbi_filtered | 176090        |        |
| KF733703_1_1487             | 176090  | KF733703        | Streptococcus sinensis strain CHDC B384 16S ribosomal RNA gene, partial sequence                        | 14-Jan-14     | 4-Jan-18      | 1           | Streptococcus sinensis                  |                                 | Streptococcus sinensis                  | 1487   | 0           | CHDC B384              | genomic DNA |         | oral cavity                                                                | 1         | 1487     | FALSE   | ncbi_filtered | 176090        |        |
| KF733705_1_1488             | 176090  | KF733705        | Streptococcus sinensis strain CHDC B386 16S ribosomal RNA gene, partial sequence                        | 14-Jan-14     | 4-Jan-18      | 1           | Streptococcus sinensis                  |                                 | Streptococcus sinensis                  | 1488   | 0           | CHDC B386              | genomic DNA |         | oral cavity                                                                | 1         | 1488     | FALSE   | ncbi_filtered | 176090        |        |
| KF733706_1_1488             | 176090  | KF733706        | Streptococcus sinensis strain CHDC B387 16S ribosomal RNA gene, partial sequence                        | 14-Jan-14     | 4-Jan-18      | 1           | Streptococcus sinensis                  |                                 | Streptococcus sinensis                  | 1488   | 0           | CHDC B387              | genomic DNA |         | oral cavity                                                                | 1         | 1488     | FALSE   | ncbi_filtered | 176090        |        |
| NZ_JPEN01000064_180_1743    | 176090  | NZ_JPEN01000064 | Streptococcus sinensis strain HKU4 C5295, whole genome shotgun sequence                                 | 17-Apr-17     | 4-Jan-18      | 1           | Streptococcus sinensis                  | WGS,RefSeq                      | Streptococcus sinensis                  | 1564   | 0           | HKU4                   | genomic DNA |         | blood culture of a patient with infective endocarditis                     | 180       | 1743     | TRUE    | ncbi_filtered | 176090        |        |
| NR_026393_1_1505            | 178214  | NR_026393       | Facklamia hominis strain ATCC 70628 16S ribosomal RNA, partial sequence                                 | 24-Oct-17     | 4-Jan-18      | 1           | Facklamia hominis                       | RefSeq                          | Facklamia hominis                       | 1505   | 5           | ATCC 70628             | rRNA        |         |                                                                            | 1         | 1505     | TRUE    | ncbi_filtered | 178214        |        |
| NZ_JH932292_1892717_1894273 | 883111  | NZ_JH932292     | Facklamia hominis strain CCUG 36813, whole genome shotgun sequence                                      | 8-Apr-17      | 4-Jan-18      | 1           | Facklamia hominis CCUG 36813            | WGS,HIGH_QUALITY_DRAFT,RefSeq   | Facklamia hominis CCUG 36813            | 1557   | 0           | CCUG 36813             | genomic DNA |         | biological product [ENVO:02000043]                                         | 1892717   | 1894273  | TRUE    | ncbi_filtered | 178214        |        |
| NZ_KX340335_445_2001        | 883111  | NZ_KX340335     | Facklamia hominis strain ACS-120-V-Sch10-supernatant, whole genome shotgun sequence                     | 8-Apr-17      | 4-Jan-18      | 1           | Facklamia hominis ACS-120-V-Sch10       | WGS,HIGH_QUALITY_DRAFT,RefSeq   | Facklamia hominis ACS-120-V-Sch10       | 1557   | 0           | ACS-120-V-Sch10        | genomic DNA |         |                                                                            | 445       | 2001     | FALSE   | ncbi_filtered | 178214        |        |
| NR_025200_1_1425            | 178339  | NR_025200       | Actinomyces hongkongensis strain HKUB 16S ribosomal RNA gene, partial sequence                          | 3-Feb-15      | 4-Jan-18      | 1           | Actinomyces hongkongensis               | RefSeq                          | Actinomyces hongkongensis               | 1425   | 0           | HKUB; DSM              |             |         |                                                                            |           |          |         |               |               |        |

| seqname                        | tax_id  | accession       | description                                                                              | modified_date | download_date | version | num_source | keywords                              | organism                               | length  | ambig_count | strain                               | mol_type    | isolate | isolation_source                                                     | seq_start | seq_stop | is_type | collection    | species |
|--------------------------------|---------|-----------------|------------------------------------------------------------------------------------------|---------------|---------------|---------|------------|---------------------------------------|----------------------------------------|---------|-------------|--------------------------------------|-------------|---------|----------------------------------------------------------------------|-----------|----------|---------|---------------|---------|
| KP74574_1_1402                 | 180588  | KP74574         | Psychrobacter faecalis strain 265.3 16S ribosomal RNA gene, partial sequence             | 22-Jul-15     | 4-Jan-18      | 1       |            | Psychrobacter faecalis                | Psychrobacter faecalis                 | 1402    | 0           | 265.3                                | genomic DNA |         | spleen                                                               | 1         | 1402     | FALSE   | ncbi_filtered | 180588  |
| KU364044_1_1402                | 180588  | KU364044        | Psychrobacter faecalis strain PIGB150 16S ribosomal RNA gene, partial sequence           | 13-Jul-16     | 4-Jan-18      | 1       |            | Psychrobacter faecalis                | Psychrobacter faecalis                 | 1402    | 0           | PIGB150                              | genomic DNA |         | seawater                                                             | 1         | 1402     | FALSE   | ncbi_filtered | 180588  |
| NR_118025_1_1466               | 180588  | NR_118025       | Psychrobacter faecalis strain DSM 14664 16S ribosomal RNA gene, partial sequence         | 3-Feb-15      | 4-Jan-18      | 1       |            | Psychrobacter faecalis                | RefSeq                                 | 1466    | 0           | DSM 14664                            | rRNA        |         | pigeon feces                                                         | 1         | 1466     | TRUE    | ncbi_filtered | 180588  |
| GU561320_1_1438                | 181487  | GU561320        | Actinomyces cardiffensis strain GumJ3 16S ribosomal RNA gene, partial sequence           | 13-Mar-10     | 4-Jan-18      | 1       |            | Actinomyces cardiffensis              | Actinomyces cardiffensis               | 1438    | 0           | GumJ3                                | genomic DNA |         | oral cavity                                                          | 1         | 1438     | FALSE   | ncbi_filtered | 181487  |
| NR_025521_1_1532               | 181487  | NR_025521       | Actinomyces cardiffensis strain CCUG 44997 16S ribosomal RNA gene, partial sequence      | 3-Feb-15      | 4-Jan-18      | 1       |            | Actinomyces cardiffensis              | RefSeq                                 | 1532    | 0           | CCUG 44997                           | rRNA        |         |                                                                      | 1         | 1532     | TRUE    | ncbi_filtered | 181487  |
| NZ_KB82677_131_1694            | 888050  | NZ_KB82677      | Actinomyces cardiffensis F0333 SCAFFOLD4, whole genome shotgun sequence                  | 17-Apr-17     | 4-Jan-18      | 1       |            | Actinomyces cardiffensis F0333        | WGS,RefSeq                             | 1564    | 0           | F0333                                | genomic DNA |         | oral                                                                 | 131       | 1694     | FALSE   | ncbi_filtered | 181487  |
| FJ169867_1_1481                | 184870  | FJ169867        | Varibaculum cambriense strain M397 16S ribosomal RNA gene, partial sequence              | 6-Jul-09      | 4-Jan-18      | 1       |            | Varibaculum cambriense                | Varibaculum cambriense                 | 1481    | 0           | M397                                 | genomic DNA |         | abscess of a patient                                                 | 1         | 1481     | FALSE   | ncbi_filtered | 184870  |
| FJ169869_1_1480                | 184870  | FJ169869        | Varibaculum cambriense strain M380 16S ribosomal RNA gene, partial sequence              | 6-Jul-09      | 4-Jan-18      | 1       |            | Varibaculum cambriense                | Varibaculum cambriense                 | 1480    | 0           | M380                                 | genomic DNA |         | abscess of a patient                                                 | 1         | 1480     | FALSE   | ncbi_filtered | 184870  |
| LT232689_1_1502                | 184870  | LT232689        | Varibaculum cambriense partial 16S rRNA gene, strain Marseille-P2227                     | 21-Mar-16     | 4-Jan-18      | 1       |            | Varibaculum cambriense                | Varibaculum cambriense                 | 1502    | 0           | Marseille-P2227                      | genomic DNA |         | human gu                                                             | 1         | 1502     | FALSE   | ncbi_filtered | 184870  |
| NZ_ATU01000002_1156451_1158002 | 1123488 | NZ_ATU01000002  | Varibaculum cambriense strain UMB0796                                                    | 8-Apr-17      | 4-Jan-18      | 1       |            | Varibaculum cambriense DSM 15806      | WGS,RefSeq                             | 1552    | 0           | DSM 15806                            | genomic DNA |         |                                                                      | 1156451   | 1158002  | TRUE    | ncbi_filtered | 184870  |
| PKH01000013_2738_4286          | 184870  | PKH01000013     | Varibaculum cambriense strain LHM0796                                                    | 28-Dec-17     | 4-Jan-18      | 1       |            | Varibaculum cambriense                | WGS                                    | 1549    | 0           | UMB0796                              | genomic DNA |         |                                                                      | 2738      | 4286     | FALSE   | ncbi_filtered | 184870  |
| EU090713_1_1469                | 184882  | EU090713        | Knoella subterranea strain KOPRI_22209 16S ribosomal RNA gene, partial sequence          | 31-Aug-09     | 4-Jan-18      | 1       |            | Knoella subterranea                   | Knoella subterranea                    | 1469    | 3           | KOPRI_22209                          | genomic DNA |         |                                                                      | 1         | 1469     | FALSE   | ncbi_filtered | 184882  |
| EU087301_1_1497                | 184882  | EU087301        | Knoella subterranea strain CGCE2276 16S ribosomal RNA gene, partial sequence             | 24-Sep-10     | 4-Jan-18      | 1       |            | Knoella subterranea                   | Knoella subterranea                    | 1497    | 0           | CGCE2276                             | genomic DNA |         |                                                                      | 1         | 1497     | FALSE   | ncbi_filtered | 184882  |
| JN571054_1_1394                | 184882  | JN571054        | Knoella subterranea strain CH16 16S ribosomal RNA gene, partial sequence                 | 31-Jan-12     | 4-Jan-18      | 1       |            | Knoella subterranea                   | Knoella subterranea                    | 1394    | 1           | CH16                                 | genomic DNA |         |                                                                      | 1         | 1394     | FALSE   | ncbi_filtered | 184882  |
| NZ_AVPK01000001_3160_4691      | 1385521 | NZ_AVPK01000001 | Knoella subterranea KCTC 19937 contig1, whole genome shotgun sequence                    | 17-Apr-17     | 4-Jan-18      | 1       |            | Knoella subterranea KCTC 19937        | WGS,RefSeq                             | 1532    | 0           | KCTC 19937                           | genomic DNA |         | cave                                                                 | 3160      | 4691     | TRUE    | ncbi_filtered | 184882  |
| AY078425_1_1493                | 187101  | AY078425        | Leptotrichia amnionii 16S ribosomal RNA gene, partial sequence                           | 3-Jul-03      | 4-Jan-18      | 1       |            | Sneathia amnii                        | Sneathia amnii                         | 1493    | 3           | AMN-1                                | genomic DNA |         |                                                                      | 1         | 1493     | FALSE   | ncbi_filtered | 187101  |
| AY489565_1_1468                | 187101  | AY489565        | Leptotrichia amnionii 16S ribosomal RNA gene, partial sequence                           | 1-Dec-04      | 4-Jan-18      | 1       |            | Sneathia amnii                        | Sneathia amnii                         | 1468    | 0           |                                      | genomic DNA |         |                                                                      | 1         | 1468     | FALSE   | ncbi_filtered | 187101  |
| EF218612_1_1318                | 187101  | EF218612        | Leptotrichia amnionii strain CCUG 51846 16S ribosomal RNA gene, partial sequence         | 6-Jul-07      | 4-Jan-18      | 1       |            | Sneathia amnii                        | Sneathia amnii                         | 1318    | 0           | CCUG 51846                           | genomic DNA |         | blood culture                                                        | 1         | 1318     | FALSE   | ncbi_filtered | 187101  |
| NZ_CP011280_132028_132357      | 187101  | NZ_CP011280     | Sneathia amnii strain SN35, complete genome                                              | 17-Apr-17     | 4-Jan-18      | 1       |            | Sneathia amnii                        | RefSeq                                 | 1530    | 0           | SN35                                 | genomic DNA |         | amniotic fluid                                                       | 132028    | 132357   | TRUE    | ncbi_filtered | 187101  |
| NZ_CP011280_208045_209574      | 187101  | NZ_CP011280     | Sneathia amnii strain SN35, complete genome                                              | 17-Apr-17     | 4-Jan-18      | 1       |            | Sneathia amnii                        | RefSeq                                 | 1530    | 0           | SN35                                 | genomic DNA |         | amniotic fluid                                                       | 208045    | 209574   | TRUE    | ncbi_filtered | 187101  |
| AF473833_1_1416                | 187326  | AF473833        | Megaspheera micronucleiformis strain AIP 49.01 16S ribosomal RNA gene, partial sequence  | 14-Apr-03     | 4-Jan-18      | 1       |            | Megaspheera micronucleiformis         | Megaspheera micronucleiformis          | 1416    | 0           | AIP 49.01                            | genomic DNA |         |                                                                      | 1         | 1416     | FALSE   | ncbi_filtered | 187326  |
| KC632329_1_1415                | 187326  | KC632329        | Megaspheera micronucleiformis strain OTFN 20.2 16S ribosomal RNA gene, partial sequence  | 10-Mar-13     | 4-Jan-18      | 1       |            | Megaspheera micronucleiformis         | Megaspheera micronucleiformis          | 1415    | 0           | OTFN 20.2                            | genomic DNA |         | oropharyngeal swab                                                   | 1         | 1415     | FALSE   | ncbi_filtered | 187326  |
| NR_025230_1_1411               | 187326  | NR_025230       | Megaspheera micronucleiformis strain AIP 412.00 16S ribosomal RNA gene, partial sequence | 3-Feb-15      | 4-Jan-18      | 1       |            | Megaspheera micronucleiformis         | RefSeq                                 | 1411    | 0           | AIP 412.00                           | rRNA        |         | clinical                                                             | 1         | 1411     | TRUE    | ncbi_filtered | 187326  |
| NZ_GLS183193_50_1604           | 706434  | NZ_GLS183193    | Megaspheera micronucleiformis F0359 Sclfd25, whole genome shotgun sequence               | 17-Apr-17     | 4-Jan-18      | 1       |            | Megaspheera micronucleiformis F0359   | WGS,HIGH_QUALITY_DRAFT,RefSeq          | 1555    | 0           | F0359                                | genomic DNA |         | biological product [ENV02000043]                                     | 50        | 1604     | FALSE   | ncbi_filtered | 187326  |
| EF028677_1_1366                | 187327  | EF028677        | Acidaminococcus intestinalis strain ADV 2290.04 16S ribosomal RNA gene, partial sequence | 4-Oct-07      | 4-Jan-18      | 1       |            | Acidaminococcus intestinalis          | Acidaminococcus intestinalis           | 1366    | 0           | ADV 2290.04                          | genomic DNA |         |                                                                      | 1         | 1366     | FALSE   | ncbi_filtered | 187327  |
| NC_016077_120424_121988        | 568816  | NC_016077       | Acidaminococcus intestinalis strain ADV 2290.04 16S ribosomal RNA gene, partial sequence | 7-Apr-17      | 4-Jan-18      | 1       |            | Acidaminococcus intestinalis RYC-MR95 | RefSeq                                 | 1565    | 0           | RYC-MR95                             | genomic DNA |         |                                                                      | 120424    | 121988   | FALSE   | ncbi_filtered | 187327  |
| NR_041894_1_1439               | 187327  | NR_041894       | Acidaminococcus intestinalis strain ADV 255.99 16S ribosomal RNA gene, partial sequence  | 3-Feb-15      | 4-Jan-18      | 1       |            | Acidaminococcus intestinalis          | RefSeq                                 | 1439    | 0           | ADV 255.99                           | rRNA        |         |                                                                      | 1         | 1439     | TRUE    | ncbi_filtered | 187327  |
| AY244769_1_1531                | 187328  | AY244769        | Veillonella sp. 2001-112662 16S ribosomal RNA gene, partial sequence                     | 16-Apr-03     | 4-Jan-18      | 1       |            | Veillonella montpellierensis          | Veillonella montpellierensis           | 1531    | 1           | 2001-112662                          | genomic DNA |         | isolated from blood culture from a female patient under septic shock | 1         | 1531     | FALSE   | ncbi_filtered | 187328  |
| AY355142_1_1374                | 187328  | AY355142        | Veillonella sp. ADV 3198.03 16S ribosomal RNA gene, partial sequence                     | 28-Jul-04     | 4-Jan-18      | 1       |            | Veillonella montpellierensis          | Veillonella montpellierensis           | 1374    | 0           | ADV 3198.03                          | genomic DNA |         | clinical                                                             | 1         | 1374     | FALSE   | ncbi_filtered | 187328  |
| KP941176_1_1473                | 187328  | KP941176        | Veillonella montpellierensis strain N80101 16S ribosomal RNA gene, partial sequence      | 1-Sep-15      | 4-Jan-18      | 1       |            | Veillonella montpellierensis          | Veillonella montpellierensis           | 1473    | 0           | N80101                               | genomic DNA |         | pus                                                                  | 1         | 1473     | FALSE   | ncbi_filtered | 187328  |
| NR_028839_1_1409               | 187328  | NR_028839       | Veillonella montpellierensis strain ADV 281.99 16S ribosomal RNA gene, partial sequence  | 3-Feb-15      | 4-Jan-18      | 1       |            | Veillonella montpellierensis          | RefSeq                                 | 1409    | 0           | ADV 281.99                           | rRNA        |         |                                                                      | 1         | 1409     | TRUE    | ncbi_filtered | 187328  |
| NZ_JNTO1000047_110_1676        | 1401067 | NZ_JNTO1000047  | Veillonella montpellierensis DNF00314 contig47, whole genome shotgun sequence            | 9-Apr-17      | 4-Jan-18      | 1       |            | Veillonella montpellierensis DNF00314 | WGS,HIGH_QUALITY_DRAFT,RefSeq          | 1567    | 0           | DNF00314                             | genomic DNA |         | vagina                                                               | 110       | 1676     | FALSE   | ncbi_filtered | 187328  |
| NR_028971_1_1466               | 187491  | NR_028971       | Corynebacterium glaucum strain IMMB R-5091 16S ribosomal RNA gene, partial sequence      | 3-Feb-15      | 4-Jan-18      | 1       |            | Corynebacterium glaucum               | RefSeq                                 | 1466    | 0           | IMMB R-5091; DSM 44530; NRRL B-24142 | rRNA        |         |                                                                      | 1         | 1466     | TRUE    | ncbi_filtered | 187491  |
| NZ_CP019688_1235453_1236979    | 187491  | NZ_CP019688     | Corynebacterium glaucum strain DSM 30827, complete genome                                | 9-Sep-17      | 4-Jan-18      | 1       |            | Corynebacterium glaucum               | RefSeq                                 | 1527    | 0           | DSM 30827                            | genomic DNA |         | ESA spacecraft assembly clean room                                   | 1235453   | 1236979  | FALSE   | ncbi_filtered | 187491  |
| NZ_CP019688_2105135_2106661    | 187491  | NZ_CP019688     | Corynebacterium glaucum strain DSM 30827, complete genome                                | 9-Sep-17      | 4-Jan-18      | 1       |            | Corynebacterium glaucum               | RefSeq                                 | 1527    | 0           | DSM 30827                            | genomic DNA |         | ESA spacecraft assembly clean room                                   | 2105135   | 2106661  | FALSE   | ncbi_filtered | 187491  |
| JN613174_1_1513                | 187979  | JN613174        | Mitsuokella jalaludinii strain 1624 16S ribosomal RNA gene, partial sequence             | 13-Aug-12     | 4-Jan-18      | 1       |            | Mitsuokella jalaludinii               | Mitsuokella jalaludinii                | 1513    | 0           | 1624                                 | genomic DNA |         |                                                                      | 1         | 1513     | FALSE   | ncbi_filtered | 187979  |
| JN613176_1_1492                | 187979  | JN613176        | Mitsuokella jalaludinii strain 1808 16S ribosomal RNA gene, partial sequence             | 13-Aug-12     | 4-Jan-18      | 1       |            | Mitsuokella jalaludinii               | Mitsuokella jalaludinii                | 1492    | 0           | 1808                                 | genomic DNA |         |                                                                      | 1         | 1492     | FALSE   | ncbi_filtered | 187979  |
| LN998054_1_1524                | 187979  | LN998054        | Mitsuokella jalaludinii partial 16S rRNA gene, strain 585                                | 6-Feb-16      | 4-Jan-18      | 1       |            | Mitsuokella jalaludinii               | Mitsuokella jalaludinii                | 1524    | 0           | 585                                  | genomic DNA |         | Human stool specimen                                                 | 1         | 1524     | FALSE   | ncbi_filtered | 187979  |
| NR_028840_1_1543               | 187979  | NR_028840       | Mitsuokella jalaludinii strain M9 16S ribosomal RNA, partial sequence                    | 24-Oct-17     | 4-Jan-18      | 1       |            | Mitsuokella jalaludinii               | RefSeq                                 | 1543    | 0           | M9; DSM 13811                        | rRNA        |         |                                                                      | 1         | 1543     | TRUE    | ncbi_filtered | 187979  |
| NZ_CYYU01000007_113004_114661  | 187979  | NZ_CYYU01000007 | Mitsuokella jalaludinii strain 27895TDY5608828, whole genome shotgun sequence            | 11-Apr-17     | 4-Jan-18      | 1       |            | Mitsuokella jalaludinii               | WGS,RefSeq                             | 1658    | 1           | 27895TDY5608828                      | genomic DNA |         | feces                                                                | 113004    | 114661   | FALSE   | ncbi_filtered | 187979  |
| FJ711186_1_1467                | 190146  | FJ711186        | Actinotignum urinale strain NML 04A014 16S ribosomal RNA gene, partial sequence          | 14-Mar-09     | 4-Jan-18      | 1       |            | Actinotignum urinale                  | Actinotignum urinale                   | 1467    | 0           | NML 04A014                           | genomic DNA |         | blood culture                                                        | 1         | 1467     | FALSE   | ncbi_filtered | 190146  |
| NZ_ATYU01000023_32_1576        | 1120993 | NZ_ATYU01000023 | Actinotignum urinale strain G450DRAFT_scaffolds0023_23_C, whole genome shotgun sequence  | 17-Apr-17     | 4-Jan-18      | 1       |            | Actinotignum urinale DSM 15805        | WGS,IMPROVED_HIGH_QUALITY_DRAFT,RefSeq | 1545    | 0           | DSM 15805                            | genomic DNA |         |                                                                      | 32        | 1576     | TRUE    | ncbi_filtered | 190146  |
| KF378751_1_1442                | 190721  | KF378751        | Ralstonia insidiosa strain SP4 16S ribosomal RNA gene, partial sequence                  | 12-Dec-13     | 4-Jan-18      | 1       |            | Ralstonia insidiosa                   | Ralstonia insidiosa                    | 1442    | 0           | SP4                                  | genomic DNA |         | oil-contaminated soil                                                | 1         | 1442     | FALSE   | ncbi_filtered | 190721  |
| KJ848589_1_1406                | 190721  | KJ848589        | Ralstonia insidiosa strain BT 84 16S ribosomal RNA gene, partial sequence                | 30-Jun-14     | 4-Jan-18      | 1       |            | Ralstonia insidiosa                   | Ralstonia insidiosa                    | 1406    | 0           | BT 84                                | genomic DNA |         | gut                                                                  | 1         | 1406     | FALSE   | ncbi_filtered | 190721  |
| K7720193_1_1402                | 190721  | K7720193        | Ralstonia insidiosa strain MECA_14.4.4 16S ribosomal RNA gene, partial sequence          | 28-Nov-15     | 4-Jan-18      | 1       |            | Ralstonia insidiosa                   | Ralstonia insidiosa                    | 1402    | 0           | MECA_14.4.4                          | genomic DNA |         | Phoenix Faring spacecraft surfaces                                   | 1         | 1402     | FALSE   | ncbi_filtered | 190721  |
| LN890900_1_1672                | 190721  | LN890900        | Ralstonia insidiosa partial 16S rRNA gene, strain M4                                     | 18-Oct-15     | 4-Jan-18      | 1       |            | Ralstonia insidiosa                   | Ralstonia insidiosa                    | 1672    | 0           | M4                                   | genomic DNA | M4      | rock surface                                                         | 1         | 1672     | FALSE   | ncbi_filtered | 190721  |
| NZ_CP012605_3466173_3467719    | 190721  | NZ_CP012605     | Ralstonia insidiosa strain FC1138 chromosome 1, complete sequence                        | 17-Apr-17     | 4-Jan-18      | 1       |            | Ralstonia insidiosa                   | RefSeq                                 | 3466173 | 0           | FC1138                               | genomic DNA |         | fresh-cut produce processing plant                                   | 3466173   | 3467719  | FALSE   | ncbi_filtered | 190721  |
| NR_028015_1_1382               | 191493  | NR_028015       | Corynebacterium sphaeris strain CECT 5990 16S ribosomal RNA gene, partial sequence       | 3-Feb-15      | 4-Jan-18      | 1       |            | Corynebacterium sphaeris              | Corynebacterium sphaeris               | 1382    | 0           | CECT 5990                            | rRNA        |         |                                                                      | 1         | 1382     | TRUE    | ncbi_filtered | 191493  |
| NZ_CP009248_2124744_2126272    | 1437874 | NZ_CP009248     | Corynebacterium sphaeris strain DSM 44792, complete genome                               | 17-Apr-17     | 4-Jan-18      | 1       |            | Corynebacterium sphaeris DSM 44792    | RefSeq                                 | 1529    | 0           | DSM 44792                            | genomic DNA |         | cloacae of healthy wild penguins (Spheniscus magellanicus)           | 2124744   | 2126272  | TRUE    | ncbi_filtered | 191493  |
| NZ_CP009248_2551195_2552723    | 1437874 | NZ_CP009248     | Corynebacterium sphaeris strain DSM 44792, complete genome                               | 17-Apr-17     | 4-Jan-18      | 1       |            | Corynebacterium sphaeris DSM 44792    | RefSeq                                 | 1529    | 0           | DSM 44792                            | genomic DNA |         | cloacae of healthy wild penguins (Spheniscus magellanicus)           | 2551195   | 2552723  | TRUE    | ncbi_filtered | 191493  |
| AB022027_1_1407                | 191553  |                 |                                                                                          |               |               |         |            |                                       |                                        |         |             |                                      |             |         |                                                                      |           |          |         |               |         |

| seqname                     | tax_id  | accession      | description                                                                                        | modified_date | download_date | version | num_source | keywords                                          | organism                        | length | ambig_count | strain               | mol_type    | isolate    | isolation_source                         | seq_start | seq_stop | is_type | collection    | species |
|-----------------------------|---------|----------------|----------------------------------------------------------------------------------------------------|---------------|---------------|---------|------------|---------------------------------------------------|---------------------------------|--------|-------------|----------------------|-------------|------------|------------------------------------------|-----------|----------|---------|---------------|---------|
| NR_027202_1_1393            | 195749  | NR_027202      | Promicromonospora aerolata strain V-54A 16S ribosomal RNA gene, partial sequence                   | 3-Feb-15      | 4-Jan-18      | 1       |            | RefSeq                                            | Promicromonospora aerolata      | 1393   | 11          | V-54A; IFO 16526     | rRNA        |            | airborne                                 | 1         | 1393     | TRUE    | ncbi_filtered | 195749  |
| KR812326_1_1525             | 197183  | KR812326       | Alkanindiges illinoisensis strain odB20 16S ribosomal RNA gene, partial sequence                   | 8-Sep-15      | 4-Jan-18      | 1       |            | Alkanindiges illinoisensis                        | Alkanindiges illinoisensis      | 1525   | 0           | odB20                | genomic DNA |            | oil-contaminated soil                    | 1         | 1525     | FALSE   | ncbi_filtered | 197183  |
| K0770152_1_1438             | 197183  | K0770152       | Alkanindiges illinoisensis strain HYN0046 16S ribosomal RNA gene, partial sequence                 | 12-Apr-17     | 4-Jan-18      | 2       |            | Alkanindiges illinoisensis                        | Alkanindiges illinoisensis      | 1453   | 0           | HYN0046              | genomic DNA |            |                                          | 1         | 1453     | FALSE   | ncbi_filtered | 197183  |
| NR_025254_1_1533            | 197183  | NR_025254      | Alkanindiges illinoisensis strain MVAB Hex1 16S ribosomal RNA, partial sequence                    | 24-Oct-17     | 4-Jan-18      | 1       |            | Alkanindiges illinoisensis                        | Alkanindiges illinoisensis      | 1533   | 4           | MVAB Hex1            | rRNA        |            |                                          | 1         | 1533     | TRUE    | ncbi_filtered | 197183  |
| KF424272_1_1439             | 198620  | KF424272       | Pseudomonas koreensis strain JH14 16S ribosomal RNA gene, partial sequence                         | 31-Jul-13     | 4-Jan-18      | 1       |            | Pseudomonas koreensis                             | Pseudomonas koreensis           | 1439   | 0           | JH14                 | genomic DNA |            | agricultural field frozen soil in winter | 1         | 1439     | FALSE   | ncbi_filtered | 198620  |
| KU722847_1_1376             | 198620  | KU722847       | Pseudomonas koreensis strain NIH5169 16S ribosomal RNA gene, partial sequence                      | 28-Feb-16     | 4-Jan-18      | 1       |            | Pseudomonas koreensis                             | Pseudomonas koreensis           | 1376   | 0           | NIH5169              | genomic DNA |            | surface of plant                         | 1         | 1376     | FALSE   | ncbi_filtered | 198620  |
| KF910138_1_1438             | 198620  | KY910138       | Pseudomonas koreensis strain PS37A2 16S ribosomal RNA gene, partial sequence                       | 14-Apr-17     | 4-Jan-18      | 1       |            | Pseudomonas koreensis                             | Pseudomonas koreensis           | 1438   | 0           | PS37A2               | genomic DNA |            | Papaya Mealybug Gut                      | 1         | 1438     | FALSE   | ncbi_filtered | 198620  |
| MG675603_1_1427             | 198620  | MG675603       | Pseudomonas koreensis strain MaARA2 16S ribosomal RNA gene, partial sequence                       | 19-Dec-17     | 4-Jan-18      | 1       |            | Pseudomonas koreensis                             | Pseudomonas koreensis           | 1427   | 1           | MaARA2               | genomic DNA |            | mineral water                            | 1         | 1427     | FALSE   | ncbi_filtered | 198620  |
| NZ_CP014947_4780669_4782215 | 198620  | NZ_CP014947    | Pseudomonas koreensis strain D26, complete genome                                                  | 12-Apr-17     | 4-Jan-18      | 1       |            | Pseudomonas koreensis                             | Pseudomonas koreensis           | 1547   | 0           | D26                  | genomic DNA |            | soil                                     | 4780669   | 4782215  | FALSE   | ncbi_filtered | 198620  |
| AB210988_1_1471             | 199591  | AB210988       | Brevibacterium luteolum gene for 16S rRNA, partial sequence, strain: SSC51-1                       | 31-May-11     | 4-Jan-18      | 1       |            | Brevibacterium luteolum                           | Brevibacterium luteolum         | 1471   | 0           | SSC51-1              | genomic DNA |            | sewage sludge compost                    | 1         | 1471     | FALSE   | ncbi_filtered | 199591  |
| KF300374_1_14991            | 199591  | KF300374       | Brevibacterium luteolum strain y223 16S ribosomal RNA gene, partial sequence                       | 2-Apr-14      | 4-Jan-18      | 1       |            | Brevibacterium luteolum                           | Brevibacterium luteolum         | 1489   | 0           | y223                 | genomic DNA |            | ocean sediment                           | 1         | 1489     | FALSE   | ncbi_filtered | 199591  |
| L7222061_1_1430             | 199591  | L7222061       | Brevibacterium luteolum partial 16S rRNA gene, isolate BLK1                                        | 11-Apr-16     | 4-Jan-18      | 1       |            | Brevibacterium luteolum                           | Brevibacterium luteolum         | 1430   | 0           |                      | genomic DNA | BLK1       | soil                                     | 1         | 1430     | FALSE   | ncbi_filtered | 199591  |
| L7222063_1_1432             | 199591  | L7222063       | Brevibacterium luteolum partial 16S rRNA gene, isolate BLK3                                        | 11-Apr-16     | 4-Jan-18      | 1       |            | Brevibacterium luteolum                           | Brevibacterium luteolum         | 1432   | 0           |                      | genomic DNA | BLK3       | soil                                     | 1         | 1432     | FALSE   | ncbi_filtered | 199591  |
| PNF20100016_449_1983        | 199591  | PNF20100016    | Brevibacterium luteolum strain UMB0680                                                             | 10-Jan-18     | 12-Jan-18     | 1       |            | Brevibacterium luteolum                           | Brevibacterium luteolum         | 1535   | 0           | UMB0680              | genomic DNA |            | catheter                                 | 449       | 1983     | FALSE   | ncbi_filtered | 199591  |
| BFAG0100032_9_1503          | 200253  | BFAG0100032    | Deinococcus aerius TRO125 DNA, DAERI_Contig_32, whole genome shotgun sequence                      | 18-Jan-18     | 22-Jan-18     | 1       |            | Deinococcus aerius                                | WGS;STANDARD_DRAFT              | 1495   | 0           | TRO125               | genomic DNA |            |                                          | 9         | 1503     | TRUE    | ncbi_filtered | 200253  |
| NR_040934_1_1468            | 200253  | NR_040934      | Deinococcus aerius strain TRO125 16S ribosomal RNA gene, partial sequence                          | 3-Feb-15      | 4-Jan-18      | 1       |            | Deinococcus aerius                                | RefSeq                          | 1468   | 0           | TRO125               | rRNA        |            | air dust sample in the troposphere       | 1         | 1468     | TRUE    | ncbi_filtered | 200253  |
| EU350370_1_1496             | 200451  | EU350370       | Pseudomonas poae strain ST250 16S ribosomal RNA gene, partial sequence                             | 14-Jan-08     | 4-Jan-18      | 1       |            | Pseudomonas poae                                  | Pseudomonas poae                | 1496   | 0           | ST250                | genomic DNA |            |                                          | 1         | 1496     | FALSE   | ncbi_filtered | 200451  |
| HM640281_1_1433             | 200451  | HM640281       | Pseudomonas poae strain YUST-DW2 16S ribosomal RNA gene, partial sequence                          | 24-Aug-10     | 4-Jan-18      | 1       |            | Pseudomonas poae                                  | Pseudomonas poae                | 1433   | 0           | YUST-DW2             | genomic DNA |            |                                          | 1         | 1433     | FALSE   | ncbi_filtered | 200451  |
| JQ45817_1_1536              | 200451  | JQ45817        | Pseudomonas poae strain SDT2514 16S ribosomal RNA gene, partial sequence                           | 7-Feb-12      | 4-Jan-18      | 1       |            | Pseudomonas poae                                  | Pseudomonas poae                | 1536   | 0           | SDT2514              | genomic DNA |            | Bay of Bengal sediment sample            | 1         | 1536     | FALSE   | ncbi_filtered | 200451  |
| KV640191_1_1529             | 200451  | KV640191       | Pseudomonas poae strain SKUAST-K68 16S ribosomal RNA gene, partial sequence                        | 27-Feb-17     | 4-Jan-18      | 1       |            | Pseudomonas poae                                  | Pseudomonas poae                | 1529   | 0           | SKUAST-K68           | genomic DNA |            | plant                                    | 1         | 1529     | FALSE   | ncbi_filtered | 200451  |
| LC05102_1_1393              | 200451  | LC05102        | Pseudomonas poae gene for 16S ribosomal RNA, partial sequence, isolate: alkamity02                 | 16-May-15     | 4-Jan-18      | 1       |            | Pseudomonas poae                                  | Pseudomonas poae                | 1393   | 0           |                      | genomic DNA | alkamity02 | soil sample                              | 1         | 1393     | FALSE   | ncbi_filtered | 200451  |
| FJ390126_1_1222             | 202789  | FJ390126       | Actinobaculum massiliense isolate 76 16S ribosomal RNA gene, partial sequence                      | 20-Oct-09     | 4-Jan-18      | 1       |            | Actinobaculum massiliense                         | Actinobaculum massiliense       | 1222   | 2           |                      | genomic DNA |            | 76                                       | 1         | 1222     | FALSE   | ncbi_filtered | 202789  |
| FJ390130_1_1219             | 202789  | FJ390130       | Actinobaculum massiliense isolate 202 16S ribosomal RNA gene, partial sequence                     | 20-Oct-09     | 4-Jan-18      | 1       |            | Actinobaculum massiliense                         | Actinobaculum massiliense       | 1219   | 0           |                      | genomic DNA |            | 202                                      | 1         | 1219     | FALSE   | ncbi_filtered | 202789  |
| NR_041909                   | 202789  | NR_041909      | Actinobaculum massiliense strain CIP 107404 16S ribosomal RNA gene, partial sequence               | 3-Feb-15      | 4-Jan-18      | 1       |            | Actinobaculum massiliense                         | RefSeq                          | 1504   | 1           | CIP 107404           | rRNA        |            | urine of 81-year old woman with cystitis | 1         | 1504     | FALSE   | ncbi_filtered | 202789  |
| NZ_H992955_392228_393775    | 883066  | NZ_H992955     | Actinobaculum massiliense ACS-171-V-Col2 supercont1.1, whole genome shotgun sequence               | 8-Apr-17      | 4-Jan-18      | 1       |            | Actinobaculum massiliense ACS-171-V-Col2          | WGS;HIGH_QUALITY_DRAFT;RefSeq   | 1548   | 0           | ACS-171-V-COL2       | genomic DNA |            |                                          | 392228    | 393775   | FALSE   | ncbi_filtered | 202789  |
| AF508822_1_1325             | 202950  | AF508822       | Acinetobacter baylyi strain A7 16S ribosomal RNA gene, partial sequence                            | 15-Jul-03     | 4-Jan-18      | 1       |            | Acinetobacter baylyi                              | Acinetobacter baylyi            | 1325   | 1           | A7                   | genomic DNA |            | activated sludge                         | 1         | 1325     | FALSE   | ncbi_filtered | 202950  |
| AM410709_1_1408             | 1120924 | AM410709       | Acinetobacter baylyi 16S rRNA gene, strain B2                                                      | 8-Nov-06      | 4-Jan-18      | 1       |            | Acinetobacter baylyi DSM 14961 = CIP 107474       | 16S ribosomal RNA;16S rRNA gene | 1408   | 2           | B2 = CCM7195 = ACB35 | genomic DNA |            |                                          | 1         | 1408     | FALSE   | ncbi_filtered | 202950  |
| FJ976561_1_1386             | 202950  | FJ976561       | Acinetobacter baylyi strain LCRS3 16S ribosomal RNA gene, partial sequence                         | 29-Jun-09     | 4-Jan-18      | 1       |            | Acinetobacter baylyi                              | Acinetobacter baylyi            | 1386   | 3           | LCRS3                | genomic DNA |            | paddy field soil                         | 1         | 1386     | FALSE   | ncbi_filtered | 202950  |
| KJ183070_1_1393             | 202950  | KJ183070       | Acinetobacter baylyi strain BM-48 16S ribosomal RNA gene, partial sequence                         | 2-Mar-14      | 4-Jan-18      | 1       |            | Acinetobacter baylyi                              | Acinetobacter baylyi            | 1393   | 0           | BM-48                | genomic DNA |            | rhizosphere of basmati rice              | 1         | 1393     | FALSE   | ncbi_filtered | 202950  |
| KJ377371_1_1407             | 202950  | KJ377371       | Acinetobacter baylyi strain BM-59 16S ribosomal RNA gene, partial sequence                         | 12-Apr-14     | 4-Jan-18      | 1       |            | Acinetobacter baylyi                              | Acinetobacter baylyi            | 1407   | 0           | BM-59                | genomic DNA |            | rhizosphere of basmati rice              | 1         | 1407     | FALSE   | ncbi_filtered | 202950  |
| KC456560_1_1438             | 202951  | KC456560       | Acinetobacter bouvetii strain ALK053 16S ribosomal RNA gene, partial sequence                      | 5-Mar-13      | 4-Jan-18      | 1       |            | Acinetobacter bouvetii                            | Acinetobacter bouvetii          | 1438   | 0           | ALK053               | genomic DNA |            | animal waste                             | 1         | 1438     | FALSE   | ncbi_filtered | 202951  |
| MG685682_1_1222             | 202951  | MG685682       | Acinetobacter bouvetii strain TAGEM15-70-B14 16S ribosomal RNA gene, partial sequence              | 21-Dec-17     | 4-Jan-18      | 1       |            | Acinetobacter bouvetii                            | Acinetobacter bouvetii          | 1222   | 0           | TAGEM15-70-B14       | genomic DNA |            | soil                                     | 1         | 1222     | FALSE   | ncbi_filtered | 202951  |
| MH064226_1_1413             | 202951  | MH064226       | Acinetobacter bouvetii strain HA0B_15 16S ribosomal RNA gene, partial sequence                     | 21-Mar-18     | 24-Mar-18     | 1       |            | Acinetobacter bouvetii                            | Acinetobacter bouvetii          | 1413   | 0           | HA0B_15              | genomic DNA |            | activated sludge                         | 1         | 1413     | FALSE   | ncbi_filtered | 202951  |
| NR_028851_1_1325            | 202951  | NR_028851      | Acinetobacter bouvetii strain 4B02 16S ribosomal RNA gene, partial sequence                        | 3-Feb-15      | 4-Jan-18      | 1       |            | Acinetobacter bouvetii                            | RefSeq                          | 1325   | 0           | 4B02; DSM 14964      | rRNA        |            | activated sludge                         | 1         | 1325     | TRUE    | ncbi_filtered | 202951  |
| NZ_BCM01000022_172_1716     | 202951  | NZ_BCM01000022 | Acinetobacter bouvetii strain GTC 3697, whole genome shotgun sequence                              | 6-Apr-17      | 4-Jan-18      | 1       |            | Acinetobacter bouvetii                            | WGS;HIGH_QUALITY_DRAFT;RefSeq   | 1545   | 0           | GTC 3697             | genomic DNA |            |                                          | 172       | 1716     | FALSE   | ncbi_filtered | 202951  |
| JQ795854_1_1454             | 202955  | JQ795854       | Acinetobacter tjernbergiae strain M-S-TSA_51 16S ribosomal RNA gene, partial sequence              | 16-May-12     | 4-Jan-18      | 1       |            | Acinetobacter tjernbergiae                        | Acinetobacter tjernbergiae      | 1454   | 0           | M-S-TSA_51           | genomic DNA |            | roach gut                                | 1         | 1454     | FALSE   | ncbi_filtered | 202955  |
| KC213855_1_1441             | 202955  | KC213855       | Acinetobacter tjernbergiae strain Z2_TSA_33 16S ribosomal RNA gene, partial sequence               | 4-Mar-16      | 4-Jan-18      | 1       |            | Acinetobacter tjernbergiae                        | Acinetobacter tjernbergiae      | 1441   | 0           | Z2_TSA_33            | genomic DNA |            | roach gut                                | 1         | 1441     | FALSE   | ncbi_filtered | 202955  |
| KC213887_1_1437             | 202955  | KC213887       | Acinetobacter tjernbergiae strain Z2_S_TSA11 16S ribosomal RNA gene, partial sequence              | 9-Feb-13      | 4-Jan-18      | 1       |            | Acinetobacter tjernbergiae                        | Acinetobacter tjernbergiae      | 1437   | 0           | Z2_S_TSA11           | genomic DNA |            | roach gut                                | 1         | 1437     | FALSE   | ncbi_filtered | 202955  |
| KT260388_1_1440             | 202955  | KT260388       | Acinetobacter tjernbergiae strain RCB176 16S ribosomal RNA gene, partial sequence                  | 19-Sep-15     | 4-Jan-18      | 1       |            | Acinetobacter tjernbergiae                        | Acinetobacter tjernbergiae      | 1440   | 1           | RCB176               | genomic DNA |            | bat guano                                | 1         | 1440     | FALSE   | ncbi_filtered | 202955  |
| NZ_AYE01000016_3767_5311    | 1120928 | NZ_AYE01000016 | Acinetobacter tjernbergiae DSM 14971 = CIP 107465 subT1-superc02.16, whole genome shotgun sequence | 6-Apr-17      | 4-Jan-18      | 1       |            | Acinetobacter tjernbergiae DSM 14971 = CIP 107465 | WGS;RefSeq                      | 1545   | 0           | CIP 107465           | genomic DNA |            |                                          | 3767      | 5311     | TRUE    | ncbi_filtered | 202955  |
| HQ180191_1_1391             | 202956  | HQ180191       | Acinetobacter towneri strain CCM 7201 16S ribosomal RNA gene, partial sequence                     | 15-Oct-14     | 4-Jan-18      | 1       |            | Acinetobacter towneri                             | Acinetobacter towneri           | 1391   | 0           | CCM 7201             | genomic DNA |            |                                          | 1         | 1391     | FALSE   | ncbi_filtered | 202956  |
| KY411880_1_1407             | 202956  | KY411880       | Acinetobacter towneri strain NTA1-2A 16S ribosomal RNA gene, partial sequence                      | 4-Jan-18      | 12-Jan-18     | 1       |            | Acinetobacter towneri                             | Acinetobacter towneri           | 1407   | 0           | NTA1-2A              | genomic DNA |            | chicken manure                           | 1         | 1407     | FALSE   | ncbi_filtered | 202956  |
| MF765755_1_1400             | 202956  | MF765755       | Acinetobacter towneri strain SPM1 16S ribosomal RNA gene, partial sequence                         | 30-Aug-17     | 4-Jan-18      | 1       |            | Acinetobacter towneri                             | Acinetobacter towneri           | 1400   | 4           | SPM1                 | genomic DNA |            |                                          | 1         | 1400     | FALSE   | ncbi_filtered | 202956  |
| MF765757_1_1459             | 202956  | MF765757       | Acinetobacter towneri strain SPM3 16S ribosomal RNA gene, partial sequence                         | 30-Aug-17     | 4-Jan-18      | 1       |            | Acinetobacter towneri                             | Acinetobacter towneri           | 1459   | 0           | SPM3                 | genomic DNA |            |                                          | 1         | 1459     | FALSE   | ncbi_filtered | 202956  |
| NZ_MKQ50100006_37294_38752  | 202956  | NZ_MKQ50100006 | Acinetobacter towneri strain S-2aC02 Scaffold28.1_new, whole genome shotgun sequence               | 6-Apr-17      | 4-Jan-18      | 1       |            | Acinetobacter towneri                             | WGS;RefSeq                      | 1459   | 5           | S-2aC02              | genomic DNA |            | Air sample from hospital environment     | 37294     | 38752    | FALSE   | ncbi_filtered | 202956  |
| NR_042151_1_1380            | 203264  | NR_042151      | Corynebacterium sulcidorsis strain PB1/02 16S ribosomal RNA, partial sequence                      | 24-Oct-17     | 4-Jan-18      | 1       |            | Corynebacterium sulcidorsis                       | RefSeq                          | 1380   | 0           | PB1/02               | rRNA        |            |                                          | 1         | 1380     | TRUE    | ncbi_filtered | 203264  |
| NR_025248_1_1481            | 205844  | NR_025248      | Novosphingobium pentaromatorivans strain US6-1 16S ribosomal RNA, partial sequence                 | 24-Oct-17     | 4-Jan-18      | 1       |            | Novosphingobium pentaromatorivans                 | RefSeq                          | 1481   | 0           | US6-1                | rRNA        |            | Ulsan Bay sediment                       | 1         | 1481     | TRUE    | ncbi_filtered | 205844  |
| NZ_AGF01000099_369_1865     | 205844  | NZ_AGF01000099 | Novosphingobium pentaromatorivans US6-1 contig0099, whole genome shotgun sequence                  | 19-May-17     | 4-Jan-18      | 1       |            | Novosphingobium pentaromatorivans US6-1           | WGS;RefSeq                      | 1481   | 0           | US6-1                | genomic DNA |            | muddy sediment                           | 369       | 1865     | TRUE    | ncbi_filtered | 205844  |
| EU934085_1_1256             | 207340  | EU934085       | Roseomonas mucosa strain ES_21con 16S ribosomal RNA gene, partial sequence                         | 9-Sep-08      | 4-Jan-18      | 1       |            | Roseomonas mucosa                                 | Roseomonas mucosa               | 1256   | 0           | ES_21con             | genomic DNA |            | ESTEC clean room                         | 1         | 1256     | FALSE   | ncbi_filtered | 207340  |
| KF247232_1_1455             | 207340  | KF247232       | Roseomonas mucosa strain SM14032013 16S ribosomal RNA gene, partial sequence                       | 6-Jul-13      | 4-Jan-18      | 1       |            | Roseomonas mucosa                                 | Roseomonas mucosa               | 1455   | 0           | SM14032013           | genomic DNA |            |                                          | 1         | 1455     | FALSE   | ncbi_filtered | 207340  |
| KU921582_1_1384             | 207340  | KU921582       | Roseomonas mucosa strain IHBB 9443 16S ribosomal RNA gene, partial sequence                        | 22-Oct-16     | 4-Jan-18      | 1       |            | Roseomonas mucosa                                 | Roseomonas mucosa               | 1384   | 0           | IHBB 944             |             |            |                                          |           |          |         |               |         |

| seqname                         | tax_id  | accession        | description                                                                                         | modified_date | download_date | version_num | source                                                    | keywords                               | organism                                      | length | ambig_count | strain          | mol_type    | isolate | isolation_source                                                      | seq_start | seq_stop | is_type | collection    | species |
|---------------------------------|---------|------------------|-----------------------------------------------------------------------------------------------------|---------------|---------------|-------------|-----------------------------------------------------------|----------------------------------------|-----------------------------------------------|--------|-------------|-----------------|-------------|---------|-----------------------------------------------------------------------|-----------|----------|---------|---------------|---------|
| K1726037_1_1451                 | 214473  | K1726037         | Staphylococcus nepalensis strain RCB145 16S ribosomal RNA gene, partial sequence                    | 19-Sep-15     | 4-Jan-18      | 1           | Staphylococcus nepalensis                                 |                                        | Staphylococcus nepalensis                     | 1451   | 0           | RCB145          | genomic DNA |         | cave ceiling soil                                                     | 1         | 1451     | FALSE   | ncbi_filtered | 214473  |
| K1726036_1_1455                 | 214473  | K1726036         | Staphylococcus nepalensis strain RCB150 16S ribosomal RNA gene, partial sequence                    | 19-Sep-15     | 4-Jan-18      | 1           | Staphylococcus nepalensis                                 |                                        | Staphylococcus nepalensis                     | 1455   | 0           | RCB150          | genomic DNA |         | cave ceiling soil                                                     | 1         | 1455     | FALSE   | ncbi_filtered | 214473  |
| KU720589_1_1326                 | 214473  | KU720589         | Staphylococcus nepalensis strain KT1 16S ribosomal RNA gene, partial sequence                       | 29-Feb-16     | 4-Jan-18      | 1           | Staphylococcus nepalensis                                 |                                        | Staphylococcus nepalensis                     | 1326   | 0           | KT1             | genomic DNA |         | salted skin                                                           | 1         | 1326     | FALSE   | ncbi_filtered | 214473  |
| NZ_CP017460_1108818_1110375     | 214473  | NZ_CP017460      | Staphylococcus nepalensis strain JS1, complete genome                                               | 7-Oct-17      | 4-Jan-18      | 1           | Staphylococcus nepalensis                                 | RefSeq                                 | Staphylococcus nepalensis                     | 1558   | 0           | JS1             | genomic DNA |         | Korean fermented food                                                 | 1108818   | 1110375  | FALSE   | ncbi_filtered | 214473  |
| AB924521_1_1516                 | 1679    | AB924521         | Bifidobacterium longum subsp. longum gene for 16S ribosomal RNA, partial sequence, strain: YIT 4037 | 20-Aug-15     | 4-Jan-18      | 1           | Bifidobacterium longum subsp. longum                      |                                        | Bifidobacterium longum subsp. longum          | 1516   | 0           | YIT 4037        | genomic DNA |         |                                                                       | 1         | 1516     | FALSE   | ncbi_filtered | 216816  |
| J0805687_1_1428                 | 216816  | J0805687         | Bifidobacterium longum strain IMAU/R069 16S ribosomal RNA gene, partial sequence                    | 7-May-12      | 4-Jan-18      | 1           | Bifidobacterium longum                                    |                                        | Bifidobacterium longum                        | 1428   | 0           | IMAU/R069       | genomic DNA |         | feces                                                                 | 1         | 1428     | FALSE   | ncbi_filtered | 216816  |
| NC_015067_2082545_2084079       | 565042  | NC_015067        | Bifidobacterium longum subsp. longum JCM 1217 DNA, complete genome                                  | 30-Mar-17     | 4-Jan-18      | 1           | Bifidobacterium longum subsp. longum JCM 1217             | RefSeq                                 | Bifidobacterium longum subsp. longum JCM 1217 | 1535   | 0           | JCM 1217        | genomic DNA |         |                                                                       | 2082545   | 2084079  | TRUE    | ncbi_filtered | 216816  |
| NZ_CP008885_2165719_2167257     | 216816  | NZ_CP008885      | Bifidobacterium longum strain BXY01, complete genome                                                | 2-Apr-17      | 4-Jan-18      | 1           | Bifidobacterium longum                                    | RefSeq                                 | Bifidobacterium longum                        | 1539   | 0           | BXY01           | genomic DNA |         | gut                                                                   | 2165719   | 2167257  | FALSE   | ncbi_filtered | 216816  |
| NZ_M0A0E01000213_3880_5515      | 1695    | NZ_M0A0E01000213 | Bifidobacterium longum subsp. suis strain BSM11-5 223, whole genome shotgun sequence                | 5-Apr-17      | 4-Jan-18      | 1           | Bifidobacterium longum subsp. suis (Bifidobacterium suis) | WGS,RefSeq                             | Bifidobacterium longum subsp. suis            | 1536   | 0           | BSM11-5         | genomic DNA |         | infant stool                                                          | 3980      | 5515     | FALSE   | ncbi_filtered | 216816  |
| AD098612_1_1502                 | 217202  | AD098612         | Terrahaemophilus aromaticivorans gene for 16S rRNA, partial sequence                                | 25-Jun-03     | 4-Jan-18      | 1           | Terrahaemophilus aromaticivorans                          |                                        | Terrahaemophilus aromaticivorans              | 1502   | 0           | 127W            | genomic DNA |         |                                                                       | 1         | 1502     | FALSE   | ncbi_filtered | 217202  |
| HM347048_1_1401                 | 217203  | HM347048         | Achromobacter spanius strain DGC-4 16S ribosomal RNA gene, partial sequence                         | 20-Jul-10     | 4-Jan-18      | 1           | Achromobacter spanius                                     |                                        | Achromobacter spanius                         | 1401   | 0           | DGC-4           | genomic DNA |         |                                                                       | 1         | 1401     | FALSE   | ncbi_filtered | 217203  |
| JN629044_1_1461                 | 217203  | JN629044         | Achromobacter spanius strain G191 16S ribosomal RNA gene, partial sequence                          | 5-Oct-11      | 4-Jan-18      | 1           | Achromobacter spanius                                     |                                        | Achromobacter spanius                         | 1461   | 0           | G191            | genomic DNA |         |                                                                       | 1         | 1461     | FALSE   | ncbi_filtered | 217203  |
| JX130384_1_1333                 | 217203  | JX130384         | Achromobacter spanius strain R-12-1 16S ribosomal RNA gene, partial sequence                        | 17-Jun-12     | 4-Jan-18      | 1           | Achromobacter spanius                                     |                                        | Achromobacter spanius                         | 1333   | 0           | R-12-1          | genomic DNA |         | soil                                                                  | 1         | 1333     | FALSE   | ncbi_filtered | 217203  |
| KY127365_1_1343                 | 217203  | KY127365         | Achromobacter spanius strain G067 16S ribosomal RNA gene, partial sequence                          | 21-Jun-17     | 4-Jan-18      | 1           | Achromobacter spanius                                     |                                        | Achromobacter spanius                         | 1343   | 0           | G067            | genomic DNA |         |                                                                       | 1         | 1343     | FALSE   | ncbi_filtered | 217203  |
| NZ_CP025030_3137530_3139066     | 217203  | NZ_CP025030      | Achromobacter spanius strain DSM 23806, complete genome                                             | 8-Dec-17      | 4-Jan-18      | 1           | Achromobacter spanius                                     | RefSeq                                 | Achromobacter spanius                         | 1537   | 0           | DSM 23806       | genomic DNA |         |                                                                       | 3137530   | 3139066  | FALSE   | ncbi_filtered | 217203  |
| JN713210_1_1526                 | 218538  | JN713210         | Dialister invisus canine oral taxon O43 clone 1F075 16S ribosomal RNA gene, partial sequence        | 9-May-12      | 4-Jan-18      | 1           | Dialister invisus                                         | ENV                                    | Dialister invisus                             | 1526   | 0           |                 | genomic DNA |         | oral cavity subgingival plaque                                        | 1         | 1526     | FALSE   | ncbi_filtered | 218538  |
| JN713211_1_1560                 | 218538  | JN713211         | Dialister invisus canine oral taxon O43 clone OD025 16S ribosomal RNA gene, partial sequence        | 9-May-12      | 4-Jan-18      | 1           | Dialister invisus                                         | ENV                                    | Dialister invisus                             | 1560   | 0           |                 | genomic DNA |         | oral cavity subgingival plaque                                        | 1         | 1560     | FALSE   | ncbi_filtered | 218538  |
| LT232661_1_1532                 | 218538  | LT232661         | Dialister invisus partial 16S rRNA gene, strain Marseille-P2212                                     | 21-Mar-16     | 4-Jan-18      | 1           | Dialister invisus                                         |                                        | Dialister invisus                             | 1532   | 5           | Marseille-P2212 | genomic DNA |         | Human stool                                                           | 1         | 1532     | FALSE   | ncbi_filtered | 218538  |
| NZ_GG698602_828402_829976       | 592028  | NZ_GG698602      | Dialister invisus DSM 15470 Sclfd0, whole genome shotgun sequence                                   | 17-Apr-17     | 4-Jan-18      | 1           | Dialister invisus DSM 15470                               | WGS,RefSeq                             | Dialister invisus DSM 15470                   | 1575   | 0           | DSM 15470       | genomic DNA |         | biological product [ENVO:02000043]                                    | 828402    | 829976   | TRUE    | ncbi_filtered | 218538  |
| AM933518_1_1489                 | 219572  | AM933518         | Pseudomonas antarctica partial 16S rRNA gene, isolate FBZ                                           | 12-Jul-08     | 4-Jan-18      | 1           | Pseudomonas antarctica                                    |                                        | Pseudomonas antarctica                        | 1489   | 3           |                 | genomic DNA | F827    | soil                                                                  | 1         | 1489     | FALSE   | ncbi_filtered | 219572  |
| FM213380_1_1496                 | 219572  | FM213380         | Pseudomonas antarctica partial 16S rRNA gene, strain KJP854                                         | 13-Aug-09     | 4-Jan-18      | 2           | Pseudomonas antarctica                                    |                                        | Pseudomonas antarctica                        | 1496   | 0           | KJP854          | genomic DNA |         | glacier                                                               | 1         | 1496     | FALSE   | ncbi_filtered | 219572  |
| FM955872_1_1530                 | 219572  | FM955872         | Pseudomonas antarctica 16S rRNA gene, strain Ad M6-3                                                | 11-Nov-09     | 4-Jan-18      | 1           | Pseudomonas antarctica                                    |                                        | Pseudomonas antarctica                        | 1530   | 0           | Ad M6-3         | genomic DNA |         | soil and sandy sediment sample                                        | 1         | 1530     | FALSE   | ncbi_filtered | 219572  |
| MG576168_1_1443                 | 219572  | MG576168         | Pseudomonas antarctica strain KBL15 16S ribosomal RNA gene, partial sequence                        | 3-Dec-17      | 4-Jan-18      | 1           | Pseudomonas antarctica                                    |                                        | Pseudomonas antarctica                        | 1443   | 0           | KBL15           | genomic DNA |         | soil                                                                  | 1         | 1443     | FALSE   | ncbi_filtered | 219572  |
| NZ_L1267904_5037478_5039024     | 219572  | NZ_L1267904      | Pseudomonas antarctica strain BS2772 genome assembly, chromosome 1                                  | 13-Apr-17     | 4-Jan-18      | 1           | Pseudomonas antarctica                                    | RefSeq                                 | Pseudomonas antarctica                        | 1547   | 0           | BS2772          | genomic DNA |         |                                                                       | 5037478   | 5039024  | FALSE   | ncbi_filtered | 219572  |
| KU163270_1_1417                 | 220343  | KU163270         | Gemmobacter nectariphilus strain TLA-31 16S ribosomal RNA gene, partial sequence                    | 28-Apr-16     | 4-Jan-18      | 1           | Gemmobacter nectariphilus                                 |                                        | Gemmobacter nectariphilus                     | 1417   | 0           | TLA-31          | genomic DNA |         | young landfill leachate                                               | 1         | 1417     | FALSE   | ncbi_filtered | 220343  |
| NZ_AUJCM01000052_338_1807       | 1121721 | NZ_AUJCM01000052 | Gemmobacter nectariphilus DSM 15620 C-2818DRA7T_scaffolds0050_S0_C, whole genome shotgun sequence   | 17-Apr-17     | 4-Jan-18      | 1           | Gemmobacter nectariphilus DSM 15620                       | WGS IMPROVED_HIGH_QUALITY_DRAFT_RefsEq | Gemmobacter nectariphilus DSM 15620           | 1470   | 0           | DSM 15620       | genomic DNA |         |                                                                       | 338       | 1807     | TRUE    | ncbi_filtered | 220343  |
| EU427313_1_1379                 | 220684  | EU427313         | Bacillus drentensis strain MD 16S ribosomal RNA gene, partial sequence                              | 20-Sep-11     | 4-Jan-18      | 1           | Bacillus drentensis                                       |                                        | Bacillus drentensis                           | 1379   | 0           | MD              | genomic DNA |         |                                                                       | 1         | 1379     | FALSE   | ncbi_filtered | 220684  |
| FI009411_1_1419                 | 220684  | FI009411         | Bacillus drentensis strain G18 16S ribosomal RNA gene, partial sequence                             | 13-Sep-08     | 4-Jan-18      | 1           | Bacillus drentensis                                       |                                        | Bacillus drentensis                           | 1419   | 0           | G18             | genomic DNA |         | soil                                                                  | 1         | 1419     | FALSE   | ncbi_filtered | 220684  |
| JX517214_1_1402                 | 220684  | JX517214         | Bacillus drentensis strain AI-25c-6 16S ribosomal RNA gene, partial sequence                        | 6-Jul-15      | 4-Jan-18      | 1           | Bacillus drentensis                                       |                                        | Bacillus drentensis                           | 1402   | 0           | AI-25c-6        | genomic DNA |         | Moon-1 Rover internal surfaces (snow and floor debris)                | 1         | 1402     | FALSE   | ncbi_filtered | 220684  |
| KT179469_1_1443                 | 220684  | KT179469         | Bacillus drentensis strain MER_TA_64 16S ribosomal RNA gene, partial sequence                       | 28-Nov-15     | 4-Jan-18      | 1           | Bacillus drentensis                                       |                                        | Bacillus drentensis                           | 1443   | 0           | MER_TA_64       | genomic DNA |         | Mars Exploration Rover spacecraft surfaces                            | 1         | 1443     | FALSE   | ncbi_filtered | 220684  |
| NZ_KV40952_462118_463660        | 220684  | NZ_KV40952       | Bacillus drentensis strain FIAT-10044 Scaffold1, whole genome shotgun sequence                      | 12-Apr-17     | 4-Jan-18      | 1           | Bacillus drentensis                                       | WGS,RefSeq                             | Bacillus drentensis                           | 1543   | 0           | FIAT-10044      | genomic DNA |         | soil                                                                  | 462118    | 463660   | TRUE    | ncbi_filtered | 220684  |
| HQ406769_1_1436                 | 220688  | HQ406769         | Bacillus soli strain TY225d 16S ribosomal RNA gene, partial sequence                                | 30-Apr-12     | 4-Jan-18      | 1           | Bacillus soli                                             |                                        | Bacillus soli                                 | 1436   | 0           | TY225d          | genomic DNA |         | Stenococcus stellatus rhizosphere during dry season                   | 1         | 1436     | FALSE   | ncbi_filtered | 220688  |
| J0415994_1_1367                 | 220688  | J0415994         | Bacillus soli strain TN22 16S ribosomal RNA gene, partial sequence                                  | 18-Mar-14     | 4-Jan-18      | 1           | Bacillus soli                                             |                                        | Bacillus soli                                 | 1367   | 0           | TN22            | genomic DNA |         |                                                                       | 1         | 1367     | FALSE   | ncbi_filtered | 220688  |
| NR_114095_1_1454                | 220688  | NR_114095        | Bacillus soli strain NBRC 102451 16S ribosomal RNA gene, partial sequence                           | 3-Feb-15      | 4-Jan-18      | 1           | Bacillus soli                                             | RefSeq                                 | Bacillus soli                                 | 1454   | 6           | NBRC 102451     | rRNA        |         |                                                                       | 1         | 1454     | TRUE    | ncbi_filtered | 220688  |
| NZ_NISV01000001_4306208_4307762 | 220688  | NZ_NISV01000001  | Bacillus soli strain DSM 15604 Scaffold1, whole genome shotgun sequence                             | 23-Sep-17     | 4-Jan-18      | 1           | Bacillus soli                                             | WGS,RefSeq                             | Bacillus soli                                 | 1555   | 0           | DSM 15604       | genomic DNA |         | several disused hay fields in the Drense A agricultural research area | 4306208   | 4307762  | TRUE    | ncbi_filtered | 220688  |
| NZ_NISV01000001_538966_5370520  | 220688  | NZ_NISV01000001  | Bacillus soli strain DSM 15604 Scaffold1, whole genome shotgun sequence                             | 23-Sep-17     | 4-Jan-18      | 1           | Bacillus soli                                             | WGS,RefSeq                             | Bacillus soli                                 | 1555   | 0           | DSM 15604       | genomic DNA |         | several disused hay fields in the Drense A agricultural research area | 538966    | 5370520  | TRUE    | ncbi_filtered | 220688  |
| AM237369_1_1209                 | 223184  | AM237369         | Kocuria marina partial 16S rRNA gene, isolate OS-69-b                                               | 5-Jan-10      | 4-Jan-18      | 1           | Kocuria marina                                            | 16S ribosomal RNA;16S rRNA gene        | Kocuria marina                                | 1209   | 0           |                 | genomic DNA | OS-69-b | barnyard dust                                                         | 1         | 1209     | FALSE   | ncbi_filtered | 223184  |
| EU073966_1_1486                 | 223184  | EU073966         | Kocuria marina strain CMG52 16S ribosomal RNA gene, partial sequence                                | 21-Jul-09     | 4-Jan-18      | 1           | Kocuria marina                                            |                                        | Kocuria marina                                | 1486   | 10          | CMG52           | genomic DNA |         | Arabian Sea                                                           | 1         | 1486     | FALSE   | ncbi_filtered | 223184  |
| KF306369_1_1493                 | 223184  | KF306369         | Kocuria marina strain Y213 16S ribosomal RNA gene, partial sequence                                 | 2-Apr-14      | 4-Jan-18      | 1           | Kocuria marina                                            |                                        | Kocuria marina                                | 1493   | 0           | Y213            | genomic DNA |         | ocean sediment                                                        | 1         | 1493     | FALSE   | ncbi_filtered | 223184  |
| K0405597_1_1392                 | 223184  | K0405597         | Kocuria marina strain JPR25 16S ribosomal RNA gene, partial sequence                                | 8-Sep-15      | 4-Jan-18      | 1           | Kocuria marina                                            |                                        | Kocuria marina                                | 1392   | 0           | JPR25           | genomic DNA |         | cow pea rhizosphere                                                   | 1         | 1392     | FALSE   | ncbi_filtered | 223184  |
| KU922277_1_1352                 | 223184  | KU922277         | Kocuria marina strain H87 16S ribosomal RNA gene, partial sequence                                  | 14-Jan-17     | 4-Jan-18      | 1           | Kocuria marina                                            |                                        | Kocuria marina                                | 1352   | 0           | H87             | genomic DNA |         | air                                                                   | 1         | 1352     | FALSE   | ncbi_filtered | 223184  |
| HM355697_1_1221                 | 223967  | HM355697         | Methylobacterium populi strain BAC2108 16S ribosomal RNA gene, partial sequence                     | 20-Jul-10     | 4-Jan-18      | 1           | Methylobacterium populi                                   |                                        | Methylobacterium populi                       | 1221   | 0           | BAC2108         | genomic DNA |         |                                                                       | 1         | 1221     | FALSE   | ncbi_filtered | 223967  |
| HQ220074_1_1429                 | 223967  | HQ220074         | Methylobacterium populi strain SNA16 16S ribosomal RNA gene, partial sequence                       | 26-Oct-11     | 4-Jan-18      | 1           | Methylobacterium populi                                   |                                        | Methylobacterium populi                       | 1429   | 0           | SNA16           | genomic DNA |         | roots                                                                 | 1         | 1429     | FALSE   | ncbi_filtered | 223967  |
| J0659313_1_1339                 | 223967  | J0659313         | Methylobacterium populi strain L2-76 16S ribosomal RNA gene, partial sequence                       | 23-Dec-15     | 4-Jan-18      | 1           | Methylobacterium populi                                   |                                        | Methylobacterium populi                       | 1339   | 2           | L2-76           | genomic DNA |         | plant tissue                                                          | 1         | 1339     | FALSE   | ncbi_filtered | 223967  |
| J0659452_1_1409                 | 223967  | J0659452         | Methylobacterium populi strain L7-571 16S ribosomal RNA gene, partial sequence                      | 23-Dec-15     | 4-Jan-18      | 1           | Methylobacterium populi                                   |                                        | Methylobacterium populi                       | 1409   | 0           | L7-571          | genomic DNA |         | plant tissue                                                          | 1         | 1409     | FALSE   | ncbi_filtered | 223967  |
| KP297981_1_1439                 | 223967  | KP297981         | Methylobacterium populi strain VP2 16S ribosomal RNA gene, partial sequence                         | 28-Aug-14     | 4-Jan-18      | 1           | Methylobacterium populi                                   |                                        | Methylobacterium populi                       | 1409   | 0           | VP2             | genomic DNA |         |                                                                       | 1         | 1409     | FALSE   | ncbi_filtered | 223967  |
| FN386747_1_1423                 | 225324  | FN386747         | Enhydrobacter aerosaccus partial 16S rRNA gene, strain Sco-C03                                      | 15-Apr-11     | 4-Jan-18      | 1           | Enhydrobacter aerosaccus                                  |                                        | Enhydrobacter aerosaccus                      | 1423   | 0           | Sco-C03         | genomic DNA |         | volcanic ash                                                          | 1         | 1423     | FALSE   | ncbi_filtered | 225324  |
| J040472_1_1477                  | 225324  | J040472          | Enhydrobacter aerosaccus strain ACCA2 16S ribosomal RNA gene, partial sequence                      | 19-Nov-15     | 4-Jan-18      | 1           | Enhydrobacter aerosaccus                                  |                                        | Enhydrobacter aerosaccus                      | 1477   | 0           | ACCA2           | genomic DNA |         | compost                                                               | 1         | 1477     | FALSE   | ncbi_filtered | 225324  |
| KF848483_1_1389                 | 225324  | KF848483         | Enhydrobacter aerosaccus strain MR-5 16S ribosomal RNA gene, partial sequence                       | 23-Dec-13     | 4-Jan-18      | 1           | Enhydrobacter aerosaccus                                  |                                        | Enhydrobacter aerosaccus                      | 1389   | 0           | MR-5            | genomic DNA |         |                                                                       | 1         | 1389     | FALSE   | ncbi_filtered | 225324  |
| KP279981_1_1439                 | 225324  | KP279981         | Enhydrobacter aerosaccus strain NS4 16S ribosomal RNA gene, partial sequence                        | 26-Apr-15     | 4-Jan-18      | 1           | Enhydrobacter aerosaccus                                  |                                        | Enhydrobacter aerosaccus                      | 1439   | 0           | NS4             | genomic DNA |         |                                                                       | 1         | 1439     | FALSE   | ncbi_filtered | 225324  |
| MH045948_1_1416                 | 225324  | MH045948         | Enhydrobacter aerosaccus strain TRE2 16S ribosomal RNA gene, partial sequence                       | 18-Mar-18     | 22-Mar-18     | 1           | Enhydrobacter aerosaccus                                  |                                        | Enhydrobacter aerosaccus                      | 1416   | 0           | TRE2            | genomic     |         |                                                                       |           |          |         |               |         |

| seqname                     | tax_id  | accession       | description                                                                           | modified_date | download_date | version | num_source                         | keywords                               | organism                           | length | ambig_count | strain                                  | mol_type    | isolate | isolation_source                                                           | seq_start | seq_stop | is_type | collection    | species |
|-----------------------------|---------|-----------------|---------------------------------------------------------------------------------------|---------------|---------------|---------|------------------------------------|----------------------------------------|------------------------------------|--------|-------------|-----------------------------------------|-------------|---------|----------------------------------------------------------------------------|-----------|----------|---------|---------------|---------|
| F104812_1_1442              | 225991  | F104812         | Comamonas aquatica strain DNP49 16S ribosomal RNA gene, partial sequence              | 10-Nov-08     | 4-Jan-18      | 1       | Comamonas aquatica                 |                                        | Comamonas aquatica                 | 1442   | 0           | DNP49                                   | genomic DNA |         | sludge from Balyangdian Lake                                               | 1         | 1442     | FALSE   | ncbi_filtered | 225991  |
| K7176080_1_1332             | 225991  | K7176080        | Comamonas aquatica strain BUBKT 16S ribosomal RNA gene, partial sequence              | 22-Feb-16     | 4-Jan-18      | 1       | Comamonas aquatica                 |                                        | Comamonas aquatica                 | 1332   | 0           | BUBKT                                   | genomic DNA |         | kidney                                                                     | 1         | 1332     | FALSE   | ncbi_filtered | 225991  |
| KY616648_1_1376             | 225991  | KY616648        | Comamonas aquatica strain FPM-STR-3 16S ribosomal RNA gene, partial sequence          | 14-Feb-18     | 27-Feb-18     | 1       | Comamonas aquatica                 |                                        | Comamonas aquatica                 | 1376   | 0           | FPM-STR-3                               | genomic DNA |         | fresh pig manure                                                           | 1         | 1376     | FALSE   | ncbi_filtered | 225991  |
| AJ563928_1_1429             | 227605  | AJ563928        | Methylocella tundrae partial 16S rRNA gene, strain Y1                                 | 17-May-04     | 4-Jan-18      | 1       | Methylocella tundrae               | 16S ribosomal RNA;16S rRNA gene        | Methylocella tundrae               | 1429   | 0           | Y1                                      | genomic DNA |         | Tundra zone, sphagnum peatland                                             | 1         | 1429     | FALSE   | ncbi_filtered | 227605  |
| AJ563929_1_1407             | 227605  | AJ563929        | Methylocella tundrae partial 16S rRNA gene, strain Ch1                                | 17-May-04     | 4-Jan-18      | 1       | Methylocella tundrae               | 16S ribosomal RNA;16S rRNA gene        | Methylocella tundrae               | 1407   | 0           | Ch1                                     | genomic DNA |         | Tundra zone, sphagnum peatland                                             | 1         | 1407     | FALSE   | ncbi_filtered | 227605  |
| NR_025596_1_1416            | 227605  | NR_025596       | Methylocella tundrae strain T4 16S ribosomal RNA gene, partial sequence               | 3-Feb-15      | 4-Jan-18      | 1       | Methylocella tundrae               | RefSeq                                 | Methylocella tundrae               | 1416   | 0           | T4; DSM 15673                           | rRNA        |         |                                                                            | 1         | 1416     | TRUE    | ncbi_filtered | 227605  |
| NR_029083_1_1555            | 227944  | NR_029083       | Lactobacillus kalkeensis strain Kx127A2 16S ribosomal RNA, partial sequence           | 24-Oct-17     | 4-Jan-18      | 1       | Lactobacillus kalkeensis           | RefSeq                                 | Lactobacillus kalkeensis           | 1555   | 0           | Kx127A2                                 | rRNA        |         |                                                                            | 1         | 1555     | TRUE    | ncbi_filtered | 227944  |
| NR_117070_1_1513            | 227944  | NR_117070       | Lactobacillus kalkeensis strain CCG 48459 16S ribosomal RNA gene, partial sequence    | 3-Feb-15      | 4-Jan-18      | 1       | Lactobacillus kalkeensis           | RefSeq                                 | Lactobacillus kalkeensis           | 1513   | 0           | CCG 48459                               | rRNA        |         |                                                                            | 1         | 1513     | TRUE    | ncbi_filtered | 227944  |
| NZ_AZF7M1000074_125_1698    | 1423763 | NZ_AZF7M1000074 | Lactobacillus kalkeensis DSM 16043 Scaffold74, whole genome shotgun sequence          | 16-Apr-17     | 4-Jan-18      | 1       | Lactobacillus kalkeensis DSM 16043 | WGS;RefSeq                             | Lactobacillus kalkeensis DSM 16043 | 1574   | 0           | DSM 16043                               | genomic DNA |         | gastric biopsies, stomach mucosa                                           | 125       | 1698     | TRUE    | ncbi_filtered | 227944  |
| AB425942_1_1499             | 228229  | AB425942        | Lactobacillus saerimneri gene for 16S ribosomal RNA, partial sequence, strain: TB-137 | 6-Jan-10      | 4-Jan-18      | 1       | Lactobacillus saerimneri           | RefSeq                                 | Lactobacillus saerimneri           | 1499   | 0           | TB-137                                  | genomic DNA |         | equine feces                                                               | 1         | 1499     | FALSE   | ncbi_filtered | 228229  |
| AB626079_1_1499             | 228229  | AB626079        | Lactobacillus saerimneri gene for 16S rRNA, partial sequence, strain: NBRC 107826     | 16-Apr-11     | 4-Jan-18      | 1       | Lactobacillus saerimneri           | RefSeq                                 | Lactobacillus saerimneri           | 1499   | 3           | NBRC 107826                             | genomic DNA |         |                                                                            | 1         | 1499     | FALSE   | ncbi_filtered | 228229  |
| KU991812_1_1544             | 228229  | KU991812        | Lactobacillus saerimneri strain M-11 16S ribosomal RNA gene, partial sequence         | 20-Apr-16     | 4-Jan-18      | 1       | Lactobacillus saerimneri           | RefSeq                                 | Lactobacillus saerimneri           | 1544   | 0           | M-11                                    | genomic DNA |         |                                                                            | 1         | 1544     | FALSE   | ncbi_filtered | 228229  |
| NR_029085_1_1568            | 228229  | NR_029085       | Lactobacillus saerimneri strain GDA154 16S ribosomal RNA gene, partial sequence       | 3-Feb-15      | 4-Jan-18      | 1       | Lactobacillus saerimneri           | RefSeq                                 | Lactobacillus saerimneri           | 1568   | 1           | GDA154; IMG 22087; DSM 16049; CCG 48462 | rRNA        |         | pig feces                                                                  | 1         | 1568     | TRUE    | ncbi_filtered | 228229  |
| GU561348_1_1418             | 228604  | GU561348        | Prevotella salivae strain SG20 16S ribosomal RNA gene, partial sequence               | 13-Mar-10     | 4-Jan-18      | 1       | Prevotella salivae                 | RefSeq                                 | Prevotella salivae                 | 1418   | 1           | SG20                                    | genomic DNA |         | oral cavity                                                                | 1         | 1418     | FALSE   | ncbi_filtered | 228604  |
| JN867233_1_1437             | 228604  | JN867233        | Prevotella salivae strain SEQ064 16S ribosomal RNA gene, partial sequence             | 30-Mar-12     | 4-Jan-18      | 1       | Prevotella salivae                 | RefSeq                                 | Prevotella salivae                 | 1437   | 8           | SEQ064                                  | genomic DNA |         | human clinical isolate                                                     | 1         | 1437     | FALSE   | ncbi_filtered | 228604  |
| JN867237_1_1437             | 228604  | JN867237        | Prevotella salivae strain SEQ071 16S ribosomal RNA gene, partial sequence             | 30-Mar-12     | 4-Jan-18      | 1       | Prevotella salivae                 | RefSeq                                 | Prevotella salivae                 | 1437   | 5           | SEQ071                                  | genomic DNA |         | human clinical isolate                                                     | 1         | 1437     | FALSE   | ncbi_filtered | 228604  |
| NR_024816_1_1493            | 228604  | NR_024816       | Prevotella salivae strain EPSA11 16S ribosomal RNA gene, partial sequence             | 3-Feb-15      | 4-Jan-18      | 1       | Prevotella salivae                 | RefSeq                                 | Prevotella salivae                 | 1493   | 0           | EPSA11; JCM 12084                       | rRNA        |         | saliva of a patient with chronic periodontitis                             | 1         | 1493     | TRUE    | ncbi_filtered | 228604  |
| NZ_AWGW01000013_2223_3759   | 1395125 | NZ_AWGW01000013 | Prevotella salivae F0493 contig00028, whole genome shotgun sequence                   | 9-Apr-17      | 4-Jan-18      | 1       | Prevotella salivae F0493           | WGS;HIGH_QUALITY_DRAFT;RefSeq          | Prevotella salivae F0493           | 1537   | 0           | F0493                                   | genomic DNA |         | oral                                                                       | 2223      | 3759     | FALSE   | ncbi_filtered | 228604  |
| EF101551_1_1506             | 228654  | EF101551        | Psychrobacter pulmonis strain KOPR24933 16S ribosomal RNA gene, partial sequence      | 13-Jan-07     | 4-Jan-18      | 1       | Psychrobacter pulmonis             | RefSeq                                 | Psychrobacter pulmonis             | 1506   | 0           | KOPR24933                               | genomic DNA |         |                                                                            | 1         | 1506     | FALSE   | ncbi_filtered | 228654  |
| EU434359_1_1419             | 228654  | EU434359        | Psychrobacter pulmonis strain a146 16S ribosomal RNA gene, partial sequence           | 3-Jun-09      | 4-Jan-18      | 1       | Psychrobacter pulmonis             | RefSeq                                 | Psychrobacter pulmonis             | 1419   | 0           | a146                                    | genomic DNA |         | effluent of an antibiotic production wastewater treatment plant            | 1         | 1419     | FALSE   | ncbi_filtered | 228654  |
| KR140220_1_1411             | 228654  | KR140220        | Psychrobacter pulmonis strain NIES-19 16S ribosomal RNA gene, partial sequence        | 30-Jun-16     | 4-Jan-18      | 1       | Psychrobacter pulmonis             | RefSeq                                 | Psychrobacter pulmonis             | 1411   | 0           | NIES-19                                 | genomic DNA |         |                                                                            | 1         | 1411     | FALSE   | ncbi_filtered | 228654  |
| L1745968_1_1468             | 228654  | L1745968        | Psychrobacter pulmonis partial 16S rRNA gene, strain SGN isolate 2                    | 4-Mar-17      | 4-Jan-18      | 1       | Psychrobacter pulmonis             | RefSeq                                 | Psychrobacter pulmonis             | 1468   | 0           | SGN                                     | genomic DNA |         | 2 leaf                                                                     | 1         | 1468     | FALSE   | ncbi_filtered | 228654  |
| NR_028974_1_1363            | 228654  | NR_028974       | Psychrobacter pulmonis strain 5-606 16S ribosomal RNA gene, partial sequence          | 3-Feb-15      | 4-Jan-18      | 1       | Psychrobacter pulmonis             | RefSeq                                 | Psychrobacter pulmonis             | 1363   | 0           | 5-606; CECT 5809                        | rRNA        |         |                                                                            | 1         | 1363     | TRUE    | ncbi_filtered | 228654  |
| AY278631_1_1504             | 230120  | AY278631        | Streptococcus genospecies C3 16S ribosomal RNA gene, partial sequence                 | 22-Jun-10     | 4-Jan-18      | 1       | Streptococcus genospecies C3       | ENV                                    | Streptococcus genospecies C3       | 1504   | 0           |                                         | genomic DNA |         | human mouth                                                                | 1         | 1504     | FALSE   | ncbi_filtered | 230120  |
| AY278611_1_1498             | 230127  | AY278611        | Actinomyces genospecies C2 16S ribosomal RNA gene, partial sequence                   | 22-Jun-10     | 4-Jan-18      | 1       | Actinomyces genospecies C2         | ENV                                    | Actinomyces genospecies C2         | 1498   | 1           | C3M24                                   | genomic DNA |         | human mouth                                                                | 1         | 1498     | FALSE   | ncbi_filtered | 230127  |
| AY278618_1_1487             | 230135  | AY278618        | Lachnospiraceae genospecies C1 16S ribosomal RNA gene, partial sequence               | 22-Jun-10     | 4-Jan-18      | 1       | Lachnospiraceae genospecies C1     | ENV                                    | Lachnospiraceae genospecies C1     | 1487   | 0           |                                         | genomic DNA |         | human mouth                                                                | 1         | 1487     | FALSE   | ncbi_filtered | 230135  |
| AY278622_1_1525             | 230139  | AY278622        | Megaspheera genospecies C1 16S ribosomal RNA gene, partial sequence                   | 22-Jun-10     | 4-Jan-18      | 1       | Megaspheera genospecies C1         | ENV                                    | Megaspheera genospecies C1         | 1525   | 0           |                                         | genomic DNA |         | human mouth                                                                | 1         | 1525     | FALSE   | ncbi_filtered | 230139  |
| AY278625_1_1487             | 230142  | AY278625        | Prevotella genospecies C2 16S ribosomal RNA gene, partial sequence                    | 22-Jun-10     | 4-Jan-18      | 1       | Prevotella genospecies C2          | ENV                                    | Prevotella genospecies C2          | 1487   | 0           |                                         | genomic DNA |         | human mouth                                                                | 1         | 1487     | FALSE   | ncbi_filtered | 230142  |
| KY621798_1_1532             | 230310  | KY621798        | Curvibacter gracilis strain SKUAST-K34 16S ribosomal RNA gene, partial sequence       | 21-Feb-17     | 4-Jan-18      | 1       | Curvibacter gracilis               | RefSeq                                 | Curvibacter gracilis               | 1532   | 0           | SKUAST-K34                              | genomic DNA |         | plant                                                                      | 1         | 1532     | FALSE   | ncbi_filtered | 230310  |
| LC191528_1_1406             | 230310  | LC191528        | Curvibacter gracilis gene for 16S rRNA, partial sequence, strain: 62w                 | 19-Oct-16     | 4-Jan-18      | 1       | Curvibacter gracilis               | RefSeq                                 | Curvibacter gracilis               | 1406   | 0           | 62w                                     | genomic DNA |         |                                                                            | 1         | 1406     | FALSE   | ncbi_filtered | 230310  |
| NR_028655_1_1484            | 230310  | NR_028655       | Curvibacter gracilis strain 7-1 16S ribosomal RNA gene, partial sequence              | 3-Feb-15      | 4-Jan-18      | 1       | Curvibacter gracilis               | RefSeq                                 | Curvibacter gracilis               | 1484   | 0           | 7-1; IAM 15033                          | rRNA        |         | wellwater                                                                  | 1         | 1484     | TRUE    | ncbi_filtered | 230310  |
| NR_042180_1_1431            | 231434  | NR_042180       | Beijerinckia mobilis strain DSM 2326 16S ribosomal RNA gene, partial sequence         | 3-Feb-15      | 4-Jan-18      | 1       | Beijerinckia mobilis               | RefSeq                                 | Beijerinckia mobilis               | 1431   | 0           | DSM 2326                                | rRNA        |         |                                                                            | 1         | 1431     | TRUE    | ncbi_filtered | 231434  |
| NR_112220_1_1433            | 231434  | NR_112220       | Beijerinckia mobilis strain ATCC 35011 16S ribosomal RNA, partial sequence            | 24-Oct-17     | 4-Jan-18      | 1       | Beijerinckia mobilis               | RefSeq                                 | Beijerinckia mobilis               | 1433   | 0           | ATCC 35011                              | rRNA        |         |                                                                            | 1         | 1433     | TRUE    | ncbi_filtered | 231434  |
| NZ_QJH01000049_27_1524      | 231434  | NZ_QJH01000049  | Beijerinckia mobilis strain UQM 1969                                                  | 17-Apr-17     | 4-Jan-18      | 1       | Beijerinckia mobilis               | WGS;IMPROVED_HIGH_QUALITY_DRAFT;RefSeq | Beijerinckia mobilis               | 1498   | 0           | UQM 1969                                | genomic DNA |         |                                                                            | 27        | 1524     | TRUE    | ncbi_filtered | 231434  |
| AY299092_1_1446             | 233502  | AY299092        | Brevibacterium aureum strain Emb15 16S ribosomal RNA gene, partial sequence           | 18-Jun-03     | 4-Jan-18      | 1       | Brevibacterium aureum              | RefSeq                                 | Brevibacterium aureum              | 1446   | 0           | Emb15                                   | genomic DNA |         |                                                                            | 1         | 1446     | FALSE   | ncbi_filtered | 233502  |
| JX515398_1_1201             | 233502  | JX515398        | Brevibacterium aureum 16S ribosomal RNA gene, partial sequence                        | 9-May-13      | 4-Jan-18      | 1       | Brevibacterium aureum              | RefSeq                                 | Brevibacterium aureum              | 1201   | 0           | DG-12                                   | genomic DNA |         | activated sludge from pyrethroid-manufacturing wastewater treatment system | 1         | 1201     | FALSE   | ncbi_filtered | 233502  |
| KF002253_1_1394             | 233502  | KF002253        | Brevibacterium aureum strain ZT3 16S ribosomal RNA gene, partial sequence             | 20-May-13     | 4-Jan-18      | 1       | Brevibacterium aureum              | RefSeq                                 | Brevibacterium aureum              | 1394   | 0           | ZT3                                     | genomic DNA |         |                                                                            | 1         | 1394     | FALSE   | ncbi_filtered | 233502  |
| KY910099_1_1378             | 233502  | KY910099        | Brevibacterium aureum strain C4-12 16S ribosomal RNA gene, partial sequence           | 24-Jul-17     | 4-Jan-18      | 1       | Brevibacterium aureum              | RefSeq                                 | Brevibacterium aureum              | 1378   | 0           | C4-12                                   | genomic DNA |         | Captive_host_Cal_zoo                                                       | 1         | 1378     | FALSE   | ncbi_filtered | 233502  |
| NR_025600_1_1455            | 234908  | NR_025600       | Sutterella stercoricanis strain 5BAC4 16S ribosomal RNA gene, partial sequence        | 3-Feb-15      | 4-Jan-18      | 1       | Sutterella stercoricanis           | RefSeq                                 | Sutterella stercoricanis           | 1455   | 0           | 5BAC4; CCG 47620                        | rRNA        |         |                                                                            | 1         | 1455     | TRUE    | ncbi_filtered | 234908  |
| KJ419955_1_1362             | 236753  | KJ419955        | Fastidiosipila sanguinis strain BRE20130822 16S ribosomal RNA gene, partial sequence  | 30-Jun-14     | 4-Jan-18      | 1       | Fastidiosipila sanguinis           | RefSeq                                 | Fastidiosipila sanguinis           | 1362   | 0           | BRE20130822                             | rRNA        |         |                                                                            | 1         | 1362     | FALSE   | ncbi_filtered | 236753  |
| NR_042186_1_1389            | 236753  | NR_042186       | Fastidiosipila sanguinis strain CCG 47711 16S ribosomal RNA, partial sequence         | 24-Oct-17     | 4-Jan-18      | 1       | Fastidiosipila sanguinis           | RefSeq                                 | Fastidiosipila sanguinis           | 1389   | 0           | CCG 47711                               | rRNA        |         |                                                                            | 1         | 1389     | TRUE    | ncbi_filtered | 236753  |
| NZ_CP027226_1150629_1152167 | 236753  | NZ_CP027226     | Fastidiosipila sanguinis strain CCG 47711 chromosome, complete genome                 | 16-Mar-18     | 19-Mar-18     | 1       | Fastidiosipila sanguinis           | RefSeq                                 | Fastidiosipila sanguinis           | 1539   | 0           | CCG 47711                               | genomic DNA |         |                                                                            | 1150629   | 1152167  | TRUE    | ncbi_filtered | 236753  |
| KF026279_1_1573             | 237258  | KF026279        | Cloacibacterium normannense strain RA1 16S ribosomal RNA gene, partial sequence       | 9-Jul-13      | 4-Jan-18      | 1       | Cloacibacterium normannense        | RefSeq                                 | Cloacibacterium normannense        | 1573   | 0           | RA1                                     | genomic DNA |         | rumen fluid from slaughterhouse                                            | 1         | 1573     | FALSE   | ncbi_filtered | 237258  |
| KU674967_1_1440             | 237258  | KU674967        | Cloacibacterium normannense strain YL 16S ribosomal RNA gene, partial sequence        | 14-Feb-16     | 4-Jan-18      | 1       | Cloacibacterium normannense        | RefSeq                                 | Cloacibacterium normannense        | 1440   | 0           | YL                                      | genomic DNA |         | buccal cavity of diabetic individual                                       | 1         | 1440     | FALSE   | ncbi_filtered | 237258  |
| KO344889_1_1383             | 237258  | KO344889        | Cloacibacterium normannense strain FBK15 16S ribosomal RNA gene, partial sequence     | 7-Jun-16      | 4-Jan-18      | 1       | Cloacibacterium normannense        | RefSeq                                 | Cloacibacterium normannense        | 1383   | 0           | FBK15                                   | genomic DNA |         |                                                                            | 1         | 1383     | FALSE   | ncbi_filtered | 237258  |
| LN613104_1_1399             | 237258  | LN613104        | Cloacibacterium normannense partial 16S rRNA gene, isolate Bug2                       | 7-Oct-14      | 4-Jan-18      | 1       | Cloacibacterium normannense        | RefSeq                                 | Cloacibacterium normannense        | 1399   | 0           |                                         | genomic DNA | Bug2    | Biofilm developed in a hydrocarbon contaminated groundwater                | 1         | 1399     | FALSE   | ncbi_filtered | 237258  |
| NZ_FNIE01000003_49_1570     | 237258  | NZ_FNIE01000003 | Cloacibacterium normannense strain DSM 15886, whole genome shotgun sequence           | 13-Apr-17     | 4-Jan-18      | 1       | Cloacibacterium normannense        | WGS;RefSeq                             | Cloacibacterium normannense        | 1522   | 0           | DSM 15886                               | genomic DNA |         |                                                                            | 49        | 1570     | TRUE    | ncbi_filtered | 237258  |
| F157261_1_1497              | 237576  | F157261         | Oribacterium sinus strain F0268 16S ribosomal RNA gene, partial sequence              | 20-Sep-10     | 4-Jan-18      | 2       | Oribacterium sinus                 | RefSeq                                 | Oribacterium sinus                 | 1497   | 0           | F0268                                   | genomic DNA |         |                                                                            | 1         | 1497     | FALSE   | ncbi_filtered | 237576  |
| NR_029097_1_1374            | 237576  | NR_029097       | Oribacterium sinus strain AIP 354.02 16S ribosomal RNA gene, partial sequence         | 3-Feb-15      | 4-Jan-18      | 1       | Oribacterium sinus                 | RefSeq                                 | Oribacterium sinus                 | 1374   | 0           | AIP 354.02                              | rRNA        |         |                                                                            | 1         | 1374     | TRUE    | ncbi_filtered | 237576  |
| JG659478_1_1446             | 237610  | JG659478        | Pseudomonas psychrotolerans strain LB-749 16S ribosomal RNA gene, partial sequence    | 23-Dec-15     | 4-Jan-18      | 1       | Pseudomonas psychrotolerans        | RefSeq                                 | Pseudomonas psychrotolerans        | 1446   | 1           | LB-749                                  | genomic DNA |         | plant tissue                                                               | 1         | 1446     | FALSE   | ncbi_filtered | 237610  |
| JG660199_1_1456             | 237610  | JG660199        | Pseudomonas psychrotolerans strain S6-241 16S ribosomal RNA gene, partial sequence    | 23-Dec-15     |               |         |                                    |                                        |                                    |        |             |                                         |             |         |                                                                            |           |          |         |               |         |



| seqname                      | tax_id  | accession      | description                                                                                                | modified_date | download_date | version_num | source                               | keywords   | organism                             | length | ambig_count | strain           | mol_type    | isolate                                       | isolation_source | seq_start | seq_stop | is_type | collection    | species |
|------------------------------|---------|----------------|------------------------------------------------------------------------------------------------------------|---------------|---------------|-------------|--------------------------------------|------------|--------------------------------------|--------|-------------|------------------|-------------|-----------------------------------------------|------------------|-----------|----------|---------|---------------|---------|
| LF10100012_13461_4982        | 242161  | LF10100012     | Candidatus Paraburkholderia calva strain UZhb06                                                            | 31-May-16     | 4-Jan-18      | 1           | Candidatus Paraburkholderia calva    | WGS        | Candidatus Paraburkholderia calva    | 1522   | 0           | UZhb06           | genomic DNA | leaf nodules                                  |                  | 3461      | 4982     | FALSE   | ncbi_filtered | 242161  |
| LF10100022_722_2199          | 242161  | LF10100022     | Candidatus Paraburkholderia calva strain UZhb06                                                            | 31-May-16     | 4-Jan-18      | 1           | Candidatus Paraburkholderia calva    | WGS        | Candidatus Paraburkholderia calva    | 1478   | 0           | UZhb06           | genomic DNA | leaf nodules                                  |                  | 722       | 2199     | FALSE   | ncbi_filtered | 242161  |
| AB272376_1_1244              | 242606  | AB272376       | Luteibacter rhizovicius DSM 16549 strain L96T                                                              | 24-Jun-09     | 4-Jan-18      | 1           | Luteibacter rhizovicius              |            | Luteibacter rhizovicius              | 1244   | 2           | I-O-2            | genomic DNA | Forest soil                                   |                  | 1         | 1244     | FALSE   | ncbi_filtered | 242606  |
| CP017480_2297604_2299149     | 1440763 | CP017480       | Luteibacter rhizovicius DSM 16549 strain L96T, complete genome                                             | 30-Nov-16     | 4-Jan-18      | 1           | Luteibacter rhizovicius DSM 16549    |            | Luteibacter rhizovicius DSM 16549    | 1546   | 0           | L96T             | genomic DNA | Spring barley rhizosphere                     |                  | 2257604   | 2299149  | TRUE    | ncbi_filtered | 242606  |
| JF778702_1_1430              | 242606  | JF778702       | Luteibacter rhizovicius strain HR722 16S ribosomal RNA gene, partial sequence                              | 4-May-11      | 4-Jan-18      | 1           | Luteibacter rhizovicius              |            | Luteibacter rhizovicius              | 1430   | 0           | HR722            | genomic DNA | permafrost samples from Qinghai-Tibet Plateau |                  | 1         | 1430     | FALSE   | ncbi_filtered | 242606  |
| KJ589471_1_1426              | 242606  | KJ589471       | Luteibacter rhizovicius strain TX182 16S ribosomal RNA gene, partial sequence                              | 11-Jun-14     | 4-Jan-18      | 1           | Luteibacter rhizovicius              |            | Luteibacter rhizovicius              | 1426   | 0           | TX182            | genomic DNA |                                               |                  | 1         | 1426     | FALSE   | ncbi_filtered | 242606  |
| K036584_1_1412               | 242606  | K036584        | Luteibacter rhizovicius strain SIB_Pb_E3 16S ribosomal RNA gene, partial sequence                          | 14-May-16     | 4-Jan-18      | 1           | Luteibacter rhizovicius              |            | Luteibacter rhizovicius              | 1412   | 0           | SIB_Pb_E3        | genomic DNA | roots of Betula pendula L.                    |                  | 1         | 1412     | FALSE   | ncbi_filtered | 242606  |
| JN867239_1_1439              | 242750  | JN867239       | Prevotella bergensis strain SEQ073 16S ribosomal RNA gene, partial sequence                                | 30-Mar-12     | 4-Jan-18      | 1           | Prevotella bergensis                 |            | Prevotella bergensis                 | 1439   | 4           | SEQ073           | genomic DNA | human clinical isolate                        |                  | 1         | 1439     | FALSE   | ncbi_filtered | 242750  |
| JN867296_1_1431              | 242750  | JN867296       | Prevotella bergensis strain SEQ221 16S ribosomal RNA gene, partial sequence                                | 30-Mar-12     | 4-Jan-18      | 1           | Prevotella bergensis                 |            | Prevotella bergensis                 | 1431   | 7           | SEQ221           | genomic DNA | human clinical isolate                        |                  | 1         | 1431     | FALSE   | ncbi_filtered | 242750  |
| NR_113095_1_1495             | 242750  | NR_113095      | Prevotella bergensis strain JCM 13869 16S ribosomal RNA gene, partial sequence                             | 3-Feb-15      | 4-Jan-18      | 1           | Prevotella bergensis                 | RefSeq     | Prevotella bergensis                 | 1495   | 0           | JCM 13869        | rRNA        |                                               |                  | 1         | 1495     | TRUE    | ncbi_filtered | 242750  |
| NZ_GG704785_331_1871         | 585502  | NZ_GG704785    | Prevotella bergensis DSM 17361 SCAFFOLD6, whole genome shotgun sequence                                    | 17-Apr-17     | 4-Jan-18      | 1           | Prevotella bergensis DSM 17361       | WGS,RefSeq | Prevotella bergensis DSM 17361       | 1539   | 0           | DSM 17361        | genomic DNA | biological product [ENVO:02000043]            |                  | 333       | 1871     | TRUE    | ncbi_filtered | 242750  |
| AB986540_1_1418              | 243690  | AB986540       | Methylobacterium goeingsense gene for 16S ribosomal RNA, partial sequence, strain: 1c                      | 16-May-17     | 4-Jan-18      | 1           | Methylobacterium goeingsense         |            | Methylobacterium goeingsense         | 1418   | 0           | 1c               | genomic DNA |                                               |                  | 1         | 1418     | FALSE   | ncbi_filtered | 243690  |
| MF101030_1_1345              | 243690  | MF101030       | Methylobacterium goeingsense strain GYH-6 16S ribosomal RNA gene, partial sequence                         | 19-Jun-17     | 4-Jan-18      | 1           | Methylobacterium goeingsense         |            | Methylobacterium goeingsense         | 1345   | 0           | GYH-6            | genomic DNA |                                               |                  | 1         | 1345     | FALSE   | ncbi_filtered | 243690  |
| NR_115219_1_1476             | 243690  | NR_115219      | Methylobacterium goeingsense strain E113 16S ribosomal RNA gene, partial sequence                          | 3-Feb-15      | 4-Jan-18      | 1           | Methylobacterium goeingsense         | RefSeq     | Methylobacterium goeingsense         | 1476   | 0           | E113             | rRNA        |                                               |                  | 1         | 1476     | TRUE    | ncbi_filtered | 243690  |
| AY178044_1_1409              | 243701  | AY178044       | Biogard Taxon 42 16S ribosomal RNA gene, partial sequence                                                  | 15-Sep-06     | 4-Jan-18      | 1           | Pasteurella caballi                  |            | Pasteurella caballi                  | 1409   | 0           | 11               | genomic DNA | pig                                           |                  | 1         | 1409     | FALSE   | ncbi_filtered | 243701  |
| DQ381154_1_1464              | 243701  | DQ381154       | Pasteurella caballi strain NVSL 84679 16S ribosomal RNA gene, partial sequence                             | 13-Sep-06     | 4-Jan-18      | 1           | Pasteurella caballi                  |            | Pasteurella caballi                  | 1464   | 1           | NVSL 84679       | genomic DNA | pleural fluid                                 |                  | 1         | 1464     | FALSE   | ncbi_filtered | 243701  |
| NR_042881_1_1362             | 243701  | NR_042881      | Pasteurella caballi strain ATCC 49197 16S ribosomal RNA gene, partial sequence                             | 3-Feb-15      | 4-Jan-18      | 1           | Pasteurella caballi                  | RefSeq     | Pasteurella caballi                  | 1362   | 0           | ATCC 49197       | rRNA        |                                               |                  | 1         | 1362     | TRUE    | ncbi_filtered | 243701  |
| HQ407252_1_1522              | 244366  | HQ407252       | Klebsiella varicola strain G76 16S ribosomal RNA gene, partial sequence                                    | 6-Mar-12      | 4-Jan-18      | 1           | Klebsiella varicola                  |            | Klebsiella varicola                  | 1522   | 0           | G76              | genomic DNA | midgut                                        |                  | 1         | 1522     | FALSE   | ncbi_filtered | 244366  |
| KX227610_1_1242              | 244366  | KX227610       | Klebsiella varicola strain CP03 16S ribosomal RNA gene, partial sequence                                   | 20-Jun-16     | 4-Jan-18      | 1           | Klebsiella varicola                  |            | Klebsiella varicola                  | 1242   | 0           | CP03             | genomic DNA |                                               |                  | 1         | 1242     | FALSE   | ncbi_filtered | 244366  |
| NZ_CP009274_1222380_1223936  | 244366  | NZ_CP009274    | Klebsiella varicola strain DX120E, complete genome                                                         | 21-Feb-17     | 4-Jan-18      | 2           | Klebsiella varicola                  | RefSeq     | Klebsiella varicola                  | 1557   | 0           | DX120E           | genomic DNA | sugarcane root                                |                  | 1222380   | 1223936  | FALSE   | ncbi_filtered | 244366  |
| NZ_PHS0100009_368801_370348  | 244366  | NZ_PHS0100009  | Klebsiella varicola strain GTM map unlocalized plasmid p6TM-508 tlg00000175, whole genome shotgun sequence | 27-Dec-17     | 4-Jan-18      | 1           | Klebsiella varicola                  | WGS,RefSeq | Klebsiella varicola                  | 1548   | 0           | 6TM              | genomic DNA | fecal screen                                  |                  | 368801    | 370348   | FALSE   | ncbi_filtered | 244366  |
| NZ_PHS0100009_505931_507465  | 244366  | NZ_PHS0100009  | Klebsiella varicola strain GTM map unlocalized plasmid p6TM-508 tlg00000175, whole genome shotgun sequence | 27-Dec-17     | 4-Jan-18      | 1           | Klebsiella varicola                  | WGS,RefSeq | Klebsiella varicola                  | 1535   | 0           | 6TM              | genomic DNA | fecal screen                                  |                  | 505931    | 507465   | FALSE   | ncbi_filtered | 244366  |
| CP008936_309660_311166       | 244581  | CP008936       | Candidatus Caedibacter acanthamoebae, complete genome                                                      | 22-Aug-14     | 4-Jan-18      | 1           | Candidatus Caedibacter acanthamoebae |            | Candidatus Caedibacter acanthamoebae | 1507   | 0           |                  | genomic DNA | 30173                                         |                  | 309660    | 311166   | FALSE   | ncbi_filtered | 244581  |
| KY704991_1_1436              | 245836  | KY704991       | Nocardioopsis salina strain TXSSEC.3MHG6 16S ribosomal RNA gene, partial sequence                          | 12-Mar-17     | 4-Jan-18      | 1           | Nocardioopsis salina                 |            | Nocardioopsis salina                 | 1436   | 0           | TXSSEC.3MHG6     | genomic DNA | sodic saline soil                             |                  | 1         | 1436     | FALSE   | ncbi_filtered | 245836  |
| KY704992_1_1441              | 245836  | KY704992       | Nocardioopsis salina strain TXSSEC.4MHG6 16S ribosomal RNA gene, partial sequence                          | 12-Mar-17     | 4-Jan-18      | 1           | Nocardioopsis salina                 |            | Nocardioopsis salina                 | 1441   | 0           | TXSSEC.4MHG6     | genomic DNA | sodic saline soil                             |                  | 1         | 1441     | FALSE   | ncbi_filtered | 245836  |
| KY704997_1_1440              | 245836  | KY704997       | Nocardioopsis salina strain TXV14.2MHG3 16S ribosomal RNA gene, partial sequence                           | 12-Mar-17     | 4-Jan-18      | 1           | Nocardioopsis salina                 |            | Nocardioopsis salina                 | 1440   | 0           | TXV14.2MHG3      | genomic DNA | sodic saline soil                             |                  | 1         | 1440     | FALSE   | ncbi_filtered | 245836  |
| KY705004_1_1411              | 245836  | KY705004       | Nocardioopsis salina strain TXV13.7MHG3 16S ribosomal RNA gene, partial sequence                           | 12-Mar-17     | 4-Jan-18      | 1           | Nocardioopsis salina                 |            | Nocardioopsis salina                 | 1411   | 1           | TXV13.7MHG3      | genomic DNA | sodic saline soil                             |                  | 1         | 1411     | FALSE   | ncbi_filtered | 245836  |
| KY705006_1_1408              | 245836  | KY705006       | Nocardioopsis salina strain TXV11.135G3 16S ribosomal RNA gene, partial sequence                           | 12-Mar-17     | 4-Jan-18      | 1           | Nocardioopsis salina                 |            | Nocardioopsis salina                 | 1408   | 0           | TXV11.135G3      | genomic DNA | sodic saline soil                             |                  | 1         | 1408     | FALSE   | ncbi_filtered | 245836  |
| AB272333_1_1266              | 246432  | AB272333       | Staphylococcus equorum gene for 16S rRNA, partial sequence, strain: PM8                                    | 24-Jun-09     | 4-Jan-18      | 1           | Staphylococcus equorum               |            | Staphylococcus equorum               | 1266   | 1           | PM8              | genomic DNA | Poultry farmyard manure                       |                  | 1         | 1266     | FALSE   | ncbi_filtered | 246432  |
| JN792134_1_1425              | 246432  | JN792134       | Staphylococcus equorum strain SDMR1 16S ribosomal RNA gene, partial sequence                               | 26-Nov-11     | 4-Jan-18      | 1           | Staphylococcus equorum               |            | Staphylococcus equorum               | 1425   | 0           | SDMR1            | genomic DNA | venom gland                                   |                  | 1         | 1425     | FALSE   | ncbi_filtered | 246432  |
| KP261070_1_1452              | 246432  | KP261070       | Staphylococcus equorum strain MSEB 26 16S ribosomal RNA gene, complete sequence                            | 14-Jan-15     | 4-Jan-18      | 1           | Staphylococcus equorum               |            | Staphylococcus equorum               | 1452   | 0           | MSEB 26          | genomic DNA | maize seed                                    |                  | 1         | 1452     | FALSE   | ncbi_filtered | 246432  |
| KX832694_1_1451              | 246432  | KX832694       | Staphylococcus equorum strain C15 16S ribosomal RNA gene, partial sequence                                 | 2-Oct-16      | 4-Jan-18      | 1           | Staphylococcus equorum               |            | Staphylococcus equorum               | 1451   | 0           | C15              | genomic DNA | camel intestines                              |                  | 1         | 1451     | FALSE   | ncbi_filtered | 246432  |
| MF196977_1_1250              | 246432  | MF196977       | Staphylococcus equorum strain MANF5 16S ribosomal RNA gene, partial sequence                               | 10-Oct-17     | 4-Jan-18      | 1           | Staphylococcus equorum               |            | Staphylococcus equorum               | 1250   | 0           | MANF5            | genomic DNA |                                               |                  | 1         | 1250     | FALSE   | ncbi_filtered | 246432  |
| GU447235_1_1281              | 248452  | GU447235       | Psychrobacter aquaticus strain A1 16S ribosomal RNA gene, partial sequence                                 | 1-Mar-10      | 4-Jan-18      | 1           | Psychrobacter aquaticus              |            | Psychrobacter aquaticus              | 1281   | 0           | A1               | genomic DNA | marine sediment                               |                  | 1         | 1281     | FALSE   | ncbi_filtered | 248452  |
| JX122562_1_1368              | 248452  | JX122562       | Psychrobacter aquaticus strain E9 16S ribosomal RNA gene, partial sequence                                 | 30-Apr-15     | 4-Jan-18      | 1           | Psychrobacter aquaticus              |            | Psychrobacter aquaticus              | 1368   | 0           | E9               | genomic DNA | river water from Qinghai Lake                 |                  | 1         | 1368     | FALSE   | ncbi_filtered | 248452  |
| NZ_AUSW0100009_570_2163      | 1354303 | NZ_AUSW0100009 | Psychrobacter aquaticus CMS 56 contig00027, whole genome shotgun sequence                                  | 17-Apr-17     | 4-Jan-18      | 1           | Psychrobacter aquaticus CMS 56       | WGS,RefSeq | Psychrobacter aquaticus CMS 56       | 1594   | 0           | CMS 56           | genomic DNA | cyanobacterial mats                           |                  | 570       | 2163     | TRUE    | ncbi_filtered | 248452  |
| AJ290754_1_1466              | 249188  | AJ290754       | Haemophilus pittmaniae 16S ribosomal RNA;16S rRNA gene                                                     | 16-Feb-06     | 4-Jan-18      | 2           | Haemophilus pittmaniae               |            | Haemophilus pittmaniae               | 1466   | 1           | P1525            | genomic DNA |                                               |                  | 1         | 1466     | FALSE   | ncbi_filtered | 249188  |
| NZ_AFUV0100004_339540_341092 | 1035188 | NZ_AFUV0100004 | Haemophilus pittmaniae HK 85 ctg1129913985447, whole genome shotgun sequence                               | 8-Aug-17      | 4-Jan-18      | 1           | Haemophilus pittmaniae HK 85         | WGS,RefSeq | Haemophilus pittmaniae HK 85         | 1553   | 0           | HK 85            | genomic DNA | biological product [ENVO:02000043]            |                  | 339540    | 341092   | TRUE    | ncbi_filtered | 249188  |
| NZ_AFUV0100010_223115_224666 | 1035188 | NZ_AFUV0100010 | Haemophilus pittmaniae HK 85 ctg1129913985444, whole genome shotgun sequence                               | 8-Aug-17      | 4-Jan-18      | 1           | Haemophilus pittmaniae HK 85         | WGS,RefSeq | Haemophilus pittmaniae HK 85         | 1552   | 0           | HK 85            | genomic DNA | biological product [ENVO:02000043]            |                  | 223115    | 224666   | TRUE    | ncbi_filtered | 249188  |
| NZ_AFUV0100015_240362_241914 | 1035188 | NZ_AFUV0100015 | Haemophilus pittmaniae HK 85 ctg1129913985424, whole genome shotgun sequence                               | 8-Aug-17      | 4-Jan-18      | 1           | Haemophilus pittmaniae HK 85         | WGS,RefSeq | Haemophilus pittmaniae HK 85         | 1553   | 0           | HK 85            | genomic DNA | biological product [ENVO:02000043]            |                  | 240362    | 241914   | TRUE    | ncbi_filtered | 249188  |
| NZ_AFUV0100022_2062_3614     | 1035188 | NZ_AFUV0100022 | Haemophilus pittmaniae HK 85 ctg1129913985425, whole genome shotgun sequence                               | 8-Aug-17      | 4-Jan-18      | 1           | Haemophilus pittmaniae HK 85         | WGS,RefSeq | Haemophilus pittmaniae HK 85         | 1553   | 0           | HK 85            | genomic DNA | biological product [ENVO:02000043]            |                  | 2062      | 3614     | TRUE    | ncbi_filtered | 249188  |
| EF694741_1_1481              | 255045  | EF694741       | Bradyrhizobium canariense strain MCLA12 16S ribosomal RNA gene, partial sequence                           | 8-Aug-07      | 4-Jan-18      | 1           | Bradyrhizobium canariense            |            | Bradyrhizobium canariense            | 1481   | 1           | MCLA12           | genomic DNA | nodules                                       |                  | 1         | 1481     | FALSE   | ncbi_filtered | 255045  |
| KT880606_1_1439              | 255045  | KT880606       | Bradyrhizobium canariense strain BRUESC629 16S ribosomal RNA gene, partial sequence                        | 6-Apr-16      | 4-Jan-18      | 1           | Bradyrhizobium canariense            |            | Bradyrhizobium canariense            | 1439   | 0           | BRUESC629        | genomic DNA | nodule                                        |                  | 1         | 1439     | FALSE   | ncbi_filtered | 255045  |
| LJ629750_4305145_4306635     | 255045  | LJ629750       | Bradyrhizobium canariense strain GAS369 genome assembly, chromosome 1                                      | 21-Oct-16     | 4-Jan-18      | 1           | Bradyrhizobium canariense            |            | Bradyrhizobium canariense            | 1499   | 0           | GAS369           | genomic DNA |                                               |                  | 4305145   | 4306635  | FALSE   | ncbi_filtered | 255045  |
| NR_042177_1_1481             | 255045  | NR_042177      | Bradyrhizobium canariense strain BTA-1 16S ribosomal RNA, partial sequence                                 | 24-Oct-17     | 4-Jan-18      | 1           | Bradyrhizobium canariense            | RefSeq     | Bradyrhizobium canariense            | 1481   | 0           | BTA-1            | rRNA        |                                               |                  | 1         | 1481     | TRUE    | ncbi_filtered | 255045  |
| NZ_NAEX0100017_97152_98648   | 255045  | NZ_NAEX0100017 | Bradyrhizobium canariense strain UBMA050 Contig177, whole genome shotgun sequence                          | 7-Aug-17      | 4-Jan-18      | 1           | Bradyrhizobium canariense            | WGS,RefSeq | Bradyrhizobium canariense            | 1497   | 0           | UBMA050          | genomic DNA |                                               |                  | 97152     | 98648    | FALSE   | ncbi_filtered | 255045  |
| AY150051_1_1467              | 257708  | AY150051       | Roseomonas gilardii strain E9464 16S ribosomal RNA gene, partial sequence                                  | 27-Nov-02     | 4-Jan-18      | 1           | Roseomonas gilardii                  |            | Roseomonas gilardii                  | 1467   | 0           | E9464            | genomic DNA |                                               |                  | 1         | 1467     | FALSE   | ncbi_filtered | 257708  |
| LT899943_1_1485              | 257708  | LT899943       | Roseomonas gilardii partial 16S rRNA gene, strain HAMB1 2470                                               | 18-Mar-18     | 22-Mar-18     | 1           | Roseomonas gilardii                  |            | Roseomonas gilardii                  | 1485   | 0           | HAMB1 2470       | genomic DNA |                                               |                  | 1         | 1485     | FALSE   | ncbi_filtered | 257708  |
| NR_029061_1_1482             | 257708  | NR_029061      | Roseomonas gilardii strain 5424 16S ribosomal RNA gene, partial sequence                                   | 3-Feb-15      | 4-Jan-18      | 1           | Roseomonas gilardii                  | RefSeq     | Roseomonas gilardii                  | 1482   | 0           | 5424; ATCC 49956 | rRNA        |                                               |                  | 1         | 1482     | TRUE    | ncbi_filtered | 257708  |
| NR_029072_1_1485             | 243956  | NR_029072      | Roseomonas gilardii subsp. rosea strain MDA5605 16S ribosomal RNA gene, partial sequence                   | 3-Feb-15      | 4-Jan-18      | 1           | Roseomonas gilardii subsp. rosea     |            |                                      |        |             |                  |             |                                               |                  |           |          |         |               |         |

| seqname                         | tax_id  | accession       | description                                                                                         | modified_date | download_date | version | num | source | keywords                                            | organism                                                                      | length | ambig_count | strain                 | mol_type    | isolate  | isolation_source                                                   | seq_start | seq_stop | is_type | collection    | species |
|---------------------------------|---------|-----------------|-----------------------------------------------------------------------------------------------------|---------------|---------------|---------|-----|--------|-----------------------------------------------------|-------------------------------------------------------------------------------|--------|-------------|------------------------|-------------|----------|--------------------------------------------------------------------|-----------|----------|---------|---------------|---------|
| KC881247_1_1444                 | 261164  | KC881247        | Psychrobacter alimentarius strain HB15 16S ribosomal RNA gene, partial sequence                     | 7-Aug-13      | 4-Jan-18      | 1       |     |        | Psychrobacter alimentarius                          | Psychrobacter alimentarius                                                    | 1444   | 0           | HB15                   | genomic DNA |          | tobacco rhizosphere                                                | 1         | 1444     | FALSE   | ncbi_filtered | 261164  |
| KF311090_1_1403                 | 261164  | KF311090        | Psychrobacter alimentarius strain MS34 16S ribosomal RNA gene, partial sequence                     | 24-Jul-13     | 4-Jan-18      | 1       |     |        | Psychrobacter alimentarius                          | Psychrobacter alimentarius                                                    | 1403   | 0           | MS34                   | genomic DNA |          | textile wastewater                                                 | 1         | 1403     | FALSE   | ncbi_filtered | 261164  |
| KF876907_1_1441                 | 261164  | KF876907        | Psychrobacter alimentarius strain JM-T24 16S ribosomal RNA gene, partial sequence                   | 12-Feb-14     | 4-Jan-18      | 1       |     |        | Psychrobacter alimentarius                          | Psychrobacter alimentarius                                                    | 1441   | 0           | JM-T24                 | genomic DNA |          |                                                                    | 1         | 1441     | FALSE   | ncbi_filtered | 261164  |
| KT216575_1_1344                 | 261164  | KT216575        | Psychrobacter alimentarius strain FDP3-5 16S ribosomal RNA gene, partial sequence                   | 15-Nov-15     | 4-Jan-18      | 1       |     |        | Psychrobacter alimentarius                          | Psychrobacter alimentarius                                                    | 1344   | 0           | FDP3-5                 | genomic DNA |          |                                                                    | 1         | 1344     | FALSE   | ncbi_filtered | 261164  |
| NZ_CZAH01000001_1588146_1589657 | 261299  | NZ_CZAH01000001 | Intestinibacter bartlettii strain 2789SDY5834879, whole genome shotgun sequence                     | 11-Apr-17     | 4-Jan-18      | 1       |     |        | WGS;RefSeq                                          | Intestinibacter bartlettii                                                    | 1512   | 0           | 2789SDY5834879         | genomic DNA |          | faeces                                                             | 1588146   | 1589657  | FALSE   | ncbi_filtered | 261299  |
| NZ_DS499552_2036_3547           | 445973  | NZ_DS499552     | Intestinibacter bartlettii DSM 16795 ScfId_02_0, whole genome shotgun sequence                      | 10-Apr-17     | 4-Jan-18      | 1       |     |        | WGS;RefSeq                                          | Intestinibacter bartlettii DSM 16795                                          | 1512   | 0           | DSM 16795              | genomic DNA |          | biological product (ENVO:02000043)                                 | 2036      | 3547     | TRUE    | ncbi_filtered | 261299  |
| NZ_DS499568_84153_85664         | 445973  | NZ_DS499568     | Intestinibacter bartlettii DSM 16795 ScfId_02_16, whole genome shotgun sequence                     | 10-Apr-17     | 4-Jan-18      | 1       |     |        | WGS;RefSeq                                          | Intestinibacter bartlettii DSM 16795                                          | 1512   | 0           | DSM 16795              | genomic DNA |          | biological product (ENVO:02000043)                                 | 84153     | 85664    | TRUE    | ncbi_filtered | 261299  |
| AM237350_1_1481                 | 262208  | AM237350        | Kocuria carniphila partial 16S rRNA gene, isolate OS-32.d1                                          | 5-Jan-10      | 4-Jan-18      | 1       |     |        | 16S ribosomal RNA;16S rRNA gene                     | Kocuria carniphila                                                            | 1481   | 0           |                        | genomic DNA | OS-32.d1 | barnyard dust                                                      | 1         | 1481     | FALSE   | ncbi_filtered | 262208  |
| AM237351_1_1418                 | 262208  | AM237351        | Kocuria carniphila partial 16S rRNA gene, isolate OS-32.d2                                          | 5-Jan-10      | 4-Jan-18      | 1       |     |        | 16S ribosomal RNA;16S rRNA gene                     | Kocuria carniphila                                                            | 1418   | 1           |                        | genomic DNA | OS-32.d2 | barnyard dust                                                      | 1         | 1418     | FALSE   | ncbi_filtered | 262208  |
| AM237379_1_1420                 | 262208  | AM237379        | Kocuria carniphila partial 16S rRNA gene, isolate OS-94                                             | 5-Jan-10      | 4-Jan-18      | 1       |     |        | 16S ribosomal RNA;16S rRNA gene                     | Kocuria carniphila                                                            | 1420   | 2           |                        | genomic DNA | OS-94    | barnyard dust                                                      | 1         | 1420     | FALSE   | ncbi_filtered | 262208  |
| JX485387_1_1365                 | 262208  | JX485387        | Kocuria carniphila strain YM 16S ribosomal RNA gene, partial sequence                               | 6-Oct-12      | 4-Jan-18      | 1       |     |        |                                                     | Kocuria carniphila                                                            | 1365   | 0           | YM                     | genomic DNA |          |                                                                    | 1         | 1365     | FALSE   | ncbi_filtered | 262208  |
| L1223583_1_1495                 | 262208  | L1223583        | Kocuria carniphila partial 16S rRNA gene, strain Marseille-AA0361                                   | 21-Mar-16     | 4-Jan-18      | 1       |     |        |                                                     | Kocuria carniphila                                                            | 1495   | 1           | Marseille-AA0361       | genomic DNA |          | Human stool                                                        | 1         | 1495     | FALSE   | ncbi_filtered | 262208  |
| JX287838_1_1359                 | 262320  | JX287838        | Flavobacterium frigidum strain T9L.98.LAT.15.H.Gill.D 16S ribosomal RNA gene, partial sequence      | 9-Jan-14      | 4-Jan-18      | 1       |     |        |                                                     | Flavobacterium frigidum                                                       | 1359   | 0           | T9L.98.LAT.15.H.Gill.D | genomic DNA |          |                                                                    | 1         | 1359     | FALSE   | ncbi_filtered | 262320  |
| JX827215_1_1304                 | 262320  | JX827215        | Flavobacterium frigidum strain Tibeth-38 16S ribosomal RNA gene, partial sequence                   | 18-Dec-12     | 4-Jan-18      | 1       |     |        |                                                     | Flavobacterium frigidum                                                       | 1304   | 0           | Tibeth-38              | genomic DNA |          | soil from meadow with Carex vegetation along Qinghai-Tibet Highway | 1         | 1304     | FALSE   | ncbi_filtered | 262320  |
| KR088356_1_1367                 | 262320  | KR088356        | Flavobacterium frigidum strain BK22 16S ribosomal RNA gene, partial sequence                        | 30-Dec-15     | 4-Jan-18      | 1       |     |        |                                                     | Flavobacterium frigidum                                                       | 1367   | 0           | BK22                   | genomic DNA |          | groundwater                                                        | 1         | 1367     | FALSE   | ncbi_filtered | 262320  |
| NZ_FQW0G1000046_119_1636        | 262320  | NZ_FQW0G1000046 | Flavobacterium frigidum strain DSM 15937, whole genome shotgun sequence                             | 17-Apr-17     | 4-Jan-18      | 1       |     |        | WGS;RefSeq                                          | Flavobacterium frigidum                                                       | 1518   | 0           | DSM 15937              | genomic DNA |          |                                                                    | 119       | 1636     | TRUE    | ncbi_filtered | 262320  |
| NZ_MUUV01000047_57_1574         | 262320  | NZ_MUUV01000047 | Flavobacterium frigidum strain DSM 15937 43414_contig_47, whole genome shotgun sequence             | 14-Jul-17     | 4-Jan-18      | 1       |     |        | WGS;RefSeq                                          | Flavobacterium frigidum                                                       | 1518   | 0           | DSM 15937              | genomic DNA |          | seawater                                                           | 57        | 1574     | TRUE    | ncbi_filtered | 262320  |
| AY544767_1_1417                 | 265671  | AY544767        | Intectium assamensis strain BPTSA16 16S ribosomal RNA gene, partial sequence                        | 21-Mar-04     | 4-Jan-18      | 1       |     |        |                                                     | Intectium assamensis                                                          | 1417   | 0           | BPTSA16                | genomic DNA |          | warm spring                                                        | 1         | 1417     | FALSE   | ncbi_filtered | 265671  |
| EF173338_1_1421                 | 266125  | EF173338        | Phenylobacterium koreense isolate MKC7 16S ribosomal RNA gene, partial sequence                     | 15-Jan-07     | 4-Jan-18      | 1       |     |        |                                                     | Phenylobacterium koreense                                                     | 1421   | 0           |                        | genomic DNA | MKC7     | hydrocarbon-contaminated soil                                      | 1         | 1421     | FALSE   | ncbi_filtered | 266125  |
| KC855023_1_1429                 | 266125  | KC855023        | UNVERIFIED: Phenylobacterium koreense strain WX92 16S ribosomal RNA gene, partial sequence          | 26-Aug-13     | 4-Jan-18      | 1       |     |        | UNVERIFIED_ORGANISM                                 | Phenylobacterium koreense                                                     | 1429   | 0           | WX92                   | genomic DNA |          | ginger foundation soil                                             | 1         | 1429     | FALSE   | ncbi_filtered | 266125  |
| NR_041016_1_1416                | 266125  | NR_041016       | Phenylobacterium koreense strain Slu-01 16S ribosomal RNA gene, partial sequence                    | 3-Feb-15      | 4-Jan-18      | 1       |     |        | RefSeq                                              | Phenylobacterium koreense                                                     | 1416   | 0           | Slu-01                 | rRNA        |          | Aerobic sludge                                                     | 1         | 1416     | TRUE    | ncbi_filtered | 266125  |
| D0117531_1_1493                 | 267212  | D0117531        | Neisseria bacilliformis strain MDA1552 16S ribosomal RNA gene, partial sequence                     | 3-Feb-06      | 4-Jan-18      | 1       |     |        |                                                     | Neisseria bacilliformis                                                       | 1493   | 0           | MDA1552                | genomic DNA |          |                                                                    | 1         | 1493     | FALSE   | ncbi_filtered | 267212  |
| MG062894_1_1393                 | 267212  | MG062894        | Neisseria bacilliformis strain TRO7 16S ribosomal RNA gene, partial sequence                        | 21-Feb-18     | 2-Feb-18      | 2       |     |        |                                                     | Neisseria bacilliformis                                                       | 1393   | 13          | TRO7                   | genomic DNA |          | oral cavity                                                        | 1         | 1393     | FALSE   | ncbi_filtered | 267212  |
| MG062906_1_1381                 | 267212  | MG062906        | Neisseria bacilliformis strain TRO114 16S ribosomal RNA gene, partial sequence                      | 21-Feb-18     | 2-Feb-18      | 2       |     |        |                                                     | Neisseria bacilliformis                                                       | 1381   | 11          | TRO114                 | genomic DNA |          | oral cavity                                                        | 1         | 1381     | FALSE   | ncbi_filtered | 267212  |
| NR_042978_1_1489                | 888742  | NR_042978       | Neisseria bacilliformis strain MDA2833 16S ribosomal RNA gene, partial sequence                     | 3-Feb-15      | 4-Jan-18      | 1       |     |        | RefSeq                                              | Neisseria bacilliformis ATCC BAA-1200                                         | 1489   | 0           | MDA2833                | rRNA        |          |                                                                    | 1         | 1489     | TRUE    | ncbi_filtered | 267212  |
| NZ_GL878495_4360_5910           | 888742  | NZ_GL878495     | Neisseria bacilliformis ATCC BAA-1200 SCAFFOLD2, whole genome shotgun sequence                      | 7-Apr-17      | 4-Jan-18      | 1       |     |        | WGS;STANDARD_DRAFT;RefSeq                           | Neisseria bacilliformis ATCC BAA-1200                                         | 1551   | 0           | ATCC BAA-1200          | genomic DNA |          | oral cavity                                                        | 4360      | 5910     | TRUE    | ncbi_filtered | 267212  |
| AJ785571_1_1409                 | 270351  | AJ785571        | Methylobacterium aquaticum strain N000 16S ribosomal RNA gene, partial sequence                     | 22-Jan-05     | 4-Jan-18      | 1       |     |        |                                                     | Methylobacterium aquaticum                                                    | 1409   | 4           | GP22                   | genomic DNA |          | drinking water                                                     | 1         | 1409     | FALSE   | ncbi_filtered | 270351  |
| KR920749_1_1492                 | 270351  | KR920749        | Methylobacterium aquaticum strain N000 16S ribosomal RNA gene, partial sequence                     | 28-Jun-15     | 4-Jan-18      | 1       |     |        |                                                     | Methylobacterium aquaticum                                                    | 1492   | 2           | N000                   | genomic DNA |          |                                                                    | 1         | 1492     | FALSE   | ncbi_filtered | 270351  |
| NZ_AP014704_3111264_3112795     | 270351  | NZ_AP014704     | Methylobacterium aquaticum DNA, complete genome, strain MA-22A                                      | 22-Oct-17     | 4-Jan-18      | 1       |     |        | RefSeq                                              | Methylobacterium aquaticum                                                    | 1532   | 0           | MA-22A                 | genomic DNA |          |                                                                    | 3111264   | 3112795  | FALSE   | ncbi_filtered | 270351  |
| NZ_LABX01000161_75_1562         | 270351  | NZ_LABX01000161 | Methylobacterium aquaticum strain DSM 16371 contig_161, whole genome shotgun sequence               | 10-Apr-17     | 4-Jan-18      | 1       |     |        | WGS;RefSeq                                          | Methylobacterium aquaticum                                                    | 1488   | 0           | DSM 16371              | genomic DNA |          | drinking water                                                     | 75        | 1562     | TRUE    | ncbi_filtered | 270351  |
| NZ_LDRM01000027_3531_5064       | 270351  | NZ_LDRM01000027 | Methylobacterium aquaticum strain NS229 contig_27, whole genome shotgun sequence                    | 11-Apr-17     | 4-Jan-18      | 1       |     |        | WGS;RefSeq                                          | Methylobacterium aquaticum                                                    | 1534   | 0           | NS229                  | genomic DNA |          |                                                                    | 3531      | 5064     | FALSE   | ncbi_filtered | 270351  |
| JX971557_1_1364                 | 271157  | JX971557        | Flavobacterium segetis strain CH1-31 16S ribosomal RNA gene, partial sequence                       | 15-Dec-12     | 4-Jan-18      | 1       |     |        |                                                     | Flavobacterium segetis                                                        | 1364   | 0           | CH1-31                 | genomic DNA |          |                                                                    | 1         | 1364     | FALSE   | ncbi_filtered | 271157  |
| KJ943556_1_1420                 | 271157  | KJ943556        | Flavobacterium segetis strain CN7 16S ribosomal RNA gene, partial sequence                          | 13-Sep-14     | 4-Jan-18      | 1       |     |        |                                                     | Flavobacterium segetis                                                        | 1420   | 0           | CN7                    | genomic DNA |          |                                                                    | 1         | 1420     | FALSE   | ncbi_filtered | 271157  |
| NZ_FQW0E1000016_571_2088        | 271157  | NZ_FQW0E1000016 | Flavobacterium segetis strain DSM 19741, whole genome shotgun sequence                              | 17-Apr-17     | 4-Jan-18      | 1       |     |        | WGS;RefSeq                                          | Flavobacterium segetis                                                        | 1518   | 0           | DSM 19741              | genomic DNA |          |                                                                    | 571       | 2088     | FALSE   | ncbi_filtered | 271157  |
| JN424972_1_1406                 | 271420  | JN424972        | Pseudomonas xanthomarina strain DHXJ02 16S ribosomal RNA gene, partial sequence                     | 17-Aug-11     | 4-Jan-18      | 1       |     |        |                                                     | Pseudomonas xanthomarina                                                      | 1406   | 0           | DHXJ02                 | genomic DNA |          | Dunhuang Mogao Grottoes 245#                                       | 1         | 1406     | FALSE   | ncbi_filtered | 271420  |
| KC662459_1_1338                 | 271420  | KC662459        | Pseudomonas xanthomarina strain KKR1 16S ribosomal RNA gene, partial sequence                       | 27-Mar-13     | 4-Jan-18      | 1       |     |        |                                                     | Pseudomonas xanthomarina                                                      | 1238   | 0           | KKR1                   | genomic DNA |          | Kaveri River water                                                 | 1         | 1238     | FALSE   | ncbi_filtered | 271420  |
| KC843368_1_1288                 | 271420  | KC843368        | Pseudomonas xanthomarina strain 45 16S ribosomal RNA gene, partial sequence                         | 11-Jun-13     | 4-Jan-18      | 1       |     |        |                                                     | Pseudomonas xanthomarina                                                      | 1388   | 0           | 45                     | genomic DNA |          | Upan River                                                         | 1         | 1388     | FALSE   | ncbi_filtered | 271420  |
| KF562335_1_1249                 | 271420  | KF562335        | Pseudomonas xanthomarina strain EGY-WCP8 16S ribosomal RNA gene, partial sequence                   | 3-Sep-13      | 4-Jan-18      | 1       |     |        |                                                     | Pseudomonas xanthomarina                                                      | 1249   | 0           | EGY-WCP8               | genomic DNA |          | sea                                                                | 1         | 1249     | FALSE   | ncbi_filtered | 271420  |
| KM428745_1_1307                 | 271420  | KM428745        | Pseudomonas xanthomarina strain MGH113 16S ribosomal RNA gene, partial sequence                     | 23-Nov-14     | 4-Jan-18      | 1       |     |        |                                                     | Pseudomonas xanthomarina                                                      | 1307   | 0           | MGH113                 | genomic DNA |          | crude oil contaminated soil                                        | 1         | 1307     | FALSE   | ncbi_filtered | 271420  |
| AB012592_1_1485                 | 272239  | AB012592        | Zimmermannella bifida gene for 16S rRNA, partial sequence, strain: IFO 15777                        | 15-Feb-08     | 4-Jan-18      | 1       |     |        |                                                     | Pseudocylindrobacter bifida (Zimmermannella bifida)                           | 1485   | 0           | IFO 15777              | genomic DNA |          |                                                                    | 1         | 1485     | FALSE   | ncbi_filtered | 272239  |
| KC757349_1_1341                 | 272239  | KC757349        | Zimmermannella bifida strain HI2L-00027 16S ribosomal RNA gene, partial sequence                    | 5-Jun-13      | 4-Jan-18      | 1       |     |        |                                                     | Pseudocylindrobacter bifida (Zimmermannella bifida)                           | 1481   | 0           | HI2L-00027             | genomic DNA |          | blood                                                              | 1         | 1481     | FALSE   | ncbi_filtered | 272239  |
| NR_024675_1_1487                | 272239  | NR_024675       | Zimmermannella bifida strain IAM 14848 16S ribosomal RNA gene, partial sequence                     | 3-Feb-15      | 4-Jan-18      | 1       |     |        | RefSeq                                              | Pseudocylindrobacter bifida (Zimmermannella bifida)                           | 1487   | 1           | IAM 14848              | rRNA        |          |                                                                    | 1         | 1487     | TRUE    | ncbi_filtered | 272239  |
| NZ_BCSPO1000025_3730_5262       | 1349787 | NZ_BCSPO1000025 | Zimmermannella bifida NBRC 103089, whole genome shotgun sequence                                    | 16-Apr-17     | 4-Jan-18      | 1       |     |        | WGS;STANDARD_DRAFT;RefSeq                           | Zimmermannella bifida NBRC 103089                                             | 1533   | 0           | NBRC 103089            | genomic DNA |          |                                                                    | 3730      | 5262     | TRUE    | ncbi_filtered | 272239  |
| AY881243_1_1512                 | 272240  | AY881243        | Zimmermannella faecalis isolate SCH0410 16S ribosomal RNA gene, partial sequence                    | 20-Oct-08     | 4-Jan-18      | 1       |     |        |                                                     | Pseudocylindrobacter faecalis (Zimmermannella faecalis)                       | 1512   | 0           |                        | genomic DNA | SCH0410  |                                                                    | 1         | 1512     | FALSE   | ncbi_filtered | 272240  |
| JN377809_1_1504                 | 272240  | JN377809        | Zimmermannella faecalis strain BPD-4 16S ribosomal RNA gene, partial sequence                       | 26-Mar-14     | 4-Jan-18      | 2       |     |        |                                                     | Pseudocylindrobacter faecalis (Zimmermannella faecalis)                       | 1504   | 0           | BPD-4                  | genomic DNA |          | petroleum hydrocarbon contaminated sludge                          | 1         | 1504     | FALSE   | ncbi_filtered | 272240  |
| JN377812_1_1481                 | 272240  | JN377812        | Zimmermannella faecalis strain BPD-7 16S ribosomal RNA gene, partial sequence                       | 26-Mar-14     | 4-Jan-18      | 1       |     |        |                                                     | Pseudocylindrobacter faecalis (Zimmermannella faecalis)                       | 1481   | 0           | BPD-7                  | genomic DNA |          | petroleum hydrocarbon contaminated sludge                          | 1         | 1481     | FALSE   | ncbi_filtered | 272240  |
| JG684258_1_1488                 | 272240  | JG684258        | Zimmermannella faecalis strain HWG-A35 16S ribosomal RNA gene, partial sequence                     | 19-May-12     | 4-Jan-18      | 1       |     |        |                                                     | Pseudocylindrobacter faecalis (Zimmermannella faecalis)                       | 1488   | 0           | HWG-A35                | genomic DNA |          | permafrost soil samples from Kunlun Mountains Pass, Mt. Kunlun     | 1         | 1488     | FALSE   | ncbi_filtered | 272240  |
| NZ_KB907090_166_1699            | 1278308 | NZ_KB907090     | Zimmermannella faecalis ATCC 13722 strain B187 G232DRAFT_scfId000017, whole genome shotgun sequence | 17-Apr-17     | 4-Jan-18      | 1       |     |        | WGS;GSC:MIGS.2.1;IMPROVED_HIGH_QUALITY_DRAFT;RefSeq | Zimmermannella faecalis ATCC 13722 (Pseudocylindrobacter faecalis ATCC 13722) | 1534   | 0           | B187                   | genomic DNA |          |                                                                    | 166       | 1699     | TRUE    | ncbi_filtered | 272240  |
| GQ903408_1_1514                 | 279826  | GQ903408        | Bacillus foraminis strain XLS13-9 16S ribosomal RNA gene, partial sequence                          | 13-Oct-09     | 4-Jan-18      | 1       |     |        |                                                     | Bacillus foraminis                                                            | 1514   | 0           | XLS13-9                | genomic DNA |          |                                                                    | 1         | 1514     | FALSE   | ncbi_filtered | 279826  |
| KJ575004_1_1511                 | 279826  | KJ575004        | Bacillus foraminis strain NIOT-Ba-1 16S ribosomal RNA gene, partial sequence                        | 28-May-14     | 4-Jan-18      | 1       |     |        |                                                     | Bacillus foraminis                                                            | 1511   | 0           | NI                     |             |          |                                                                    |           |          |         |               |         |

| seqname                        | tax_id  | accession       | description                                                                                                             | modified_date | download_date | version | num_source                                   | keywords                        | organism                                     | length | ambig_count | strain                  | mol_type    | isolate                                                        | isolation_source                   | seq_start | seq_stop | is_type | collection    | species |
|--------------------------------|---------|-----------------|-------------------------------------------------------------------------------------------------------------------------|---------------|---------------|---------|----------------------------------------------|---------------------------------|----------------------------------------------|--------|-------------|-------------------------|-------------|----------------------------------------------------------------|------------------------------------|-----------|----------|---------|---------------|---------|
| NZ_ACLR01000152_492_2028       | 596327  | NZ_ACLR01000152 | Porphyromonas unenonis 60-3 deg1118640599623, whole genome shotgun sequence                                             | 15-Nov-17     | 4-Jan-18      | 1       | Porphyromonas unenonis 60-3                  | WGS;RefSeq                      | Porphyromonas unenonis 60-3                  | 1537   | 0           | 60-3                    | genomic DNA |                                                                | biological product [ENVO:02000043] | 492       | 2028     | FALSE   | ncbi_filtered | 281920  |
| NZ_AXVC01000022_100883_102422  | 1122976 | NZ_AXVC01000022 | Porphyromonas unenonis DSM 23387 = JCM 13868 strain DSM 23387 12SDRAFT_scaffolds0008_8_C, whole genome shotgun sequence | 10-Apr-17     | 4-Jan-18      | 1       | Porphyromonas unenonis DSM 23387 = JCM 13868 | WGS;RefSeq                      | Porphyromonas unenonis DSM 23387 = JCM 13868 | 1540   | 0           | DSM 23387               | genomic DNA |                                                                |                                    | 100883    | 102422   | TRUE    | ncbi_filtered | 281920  |
| AJ748647_1_1457                | 282125  | AJ748647        | <i>Sutterella sanguinis</i> partial 16S rRNA gene, strain CCUG 49335T                                                   | 8-Jan-07      | 4-Jan-18      | 1       | <i>Sutterella sanguinis</i>                  | 16S ribosomal RNA;16S rRNA gene | <i>Sutterella sanguinis</i>                  | 1457   | 0           |                         | genomic DNA |                                                                |                                    | 1         | 1457     | FALSE   | ncbi_filtered | 282125  |
| FJ125781_1_1524                | 284581  | FJ125781        | <i>Bacillus koreensis</i> strain 3441BRJ 16S ribosomal RNA gene, partial sequence                                       | 15-Feb-11     | 4-Jan-18      | 2       | <i>Bacillus koreensis</i>                    |                                 | <i>Bacillus koreensis</i>                    | 1524   | 1           | 3441BRJ                 | genomic DNA | clean room                                                     |                                    | 1         | 1524     | FALSE   | ncbi_filtered | 284581  |
| HM480320_1_1456                | 284581  | HM480320        | <i>Bacillus koreensis</i> strain WIF49 16S ribosomal RNA gene, partial sequence                                         | 1-Mar-11      | 4-Jan-18      | 1       | <i>Bacillus koreensis</i>                    |                                 | <i>Bacillus koreensis</i>                    | 1456   | 0           | WIF49                   | genomic DNA |                                                                |                                    | 1         | 1456     | FALSE   | ncbi_filtered | 284581  |
| KT986105_1_1459                | 284581  | KT986105        | <i>Bacillus koreensis</i> strain Lmb040 16S ribosomal RNA gene, partial sequence                                        | 18-Jun-16     | 4-Jan-18      | 1       | <i>Bacillus koreensis</i>                    |                                 | <i>Bacillus koreensis</i>                    | 1459   | 0           | Lmb040                  | genomic DNA | soil                                                           |                                    | 1         | 1459     | FALSE   | ncbi_filtered | 284581  |
| MF062974_1_1424                | 284581  | MF062974        | <i>Bacillus koreensis</i> strain TC4 16S ribosomal RNA gene, partial sequence                                           | 13-May-17     | 4-Jan-18      | 1       | <i>Bacillus koreensis</i>                    |                                 | <i>Bacillus koreensis</i>                    | 1424   | 0           | TC4                     | genomic DNA | Tomato root endophytes                                         |                                    | 1         | 1424     | FALSE   | ncbi_filtered | 284581  |
| NZ_ILCJ01000014_32_1588        | 284581  | NZ_ILCJ01000014 | <i>Bacillus koreensis</i> strain DSM 16467 Contig9, whole genome shotgun sequence                                       | 16-Apr-17     | 4-Jan-18      | 1       | <i>Bacillus koreensis</i>                    | WGS;RefSeq                      | <i>Bacillus koreensis</i>                    | 1557   | 0           | DSM 16467               | genomic DNA | rhizosphere of willow roots                                    |                                    | 32        | 1588     | TRUE    | ncbi_filtered | 284581  |
| GD153641_1_1426                | 285091  | GD153641        | <i>Alcanivorax dieselolei</i> strain ANT-2400 S5 16S ribosomal RNA gene, partial sequence                               | 11-Jan-10     | 4-Jan-18      | 1       | <i>Alcanivorax dieselolei</i>                |                                 | <i>Alcanivorax dieselolei</i>                | 1426   | 0           | ANT-2400 S5             | genomic DNA |                                                                |                                    | 1         | 1426     | FALSE   | ncbi_filtered | 285091  |
| HM640407_1_1419                | 285091  | HM640407        | <i>Alcanivorax dieselolei</i> strain VKR9P7 16S ribosomal RNA gene, partial sequence                                    | 23-Jul-10     | 4-Jan-18      | 1       | <i>Alcanivorax dieselolei</i>                |                                 | <i>Alcanivorax dieselolei</i>                | 1419   | 2           | VKR9P7                  | genomic DNA | Fishing Harbour Traverses, 13M, surface sediment, post-monsoon |                                    | 1         | 1419     | FALSE   | ncbi_filtered | 285091  |
| JX173566_1_1427                | 285091  | JX173566        | <i>Alcanivorax dieselolei</i> strain ZR049 16S ribosomal RNA gene, partial sequence                                     | 27-Aug-12     | 4-Jan-18      | 1       | <i>Alcanivorax dieselolei</i>                |                                 | <i>Alcanivorax dieselolei</i>                | 1427   | 0           | ZR049                   | genomic DNA | SEAWEED                                                        |                                    | 1         | 1427     | FALSE   | ncbi_filtered | 285091  |
| KV616271_1_1377                | 285091  | KV616271        | <i>Alcanivorax dieselolei</i> strain NIOSD020R95 16S ribosomal RNA gene, partial sequence                               | 20-Feb-17     | 4-Jan-18      | 1       | <i>Alcanivorax dieselolei</i>                |                                 | <i>Alcanivorax dieselolei</i>                | 1377   | 0           | NIOSD020R95             | genomic DNA | OM2 water column                                               |                                    | 1         | 1377     | FALSE   | ncbi_filtered | 285091  |
| NZ_CZFH01000032_1_1511         | 285091  | NZ_CZFH01000032 | <i>Alcanivorax dieselolei</i> strain KS-293, whole genome shotgun sequence                                              | 11-Apr-17     | 4-Jan-18      | 1       | <i>Alcanivorax dieselolei</i>                | WGS;RefSeq                      | <i>Alcanivorax dieselolei</i>                | 1511   | 0           | KS-293                  | genomic DNA | sea water                                                      |                                    | 1         | 1511     | FALSE   | ncbi_filtered | 285091  |
| EU33892_1_1467                 | 293050  | EU33892         | <i>Rhodococcus kroppenstedtii</i> strain K22-05 16S ribosomal RNA gene, partial sequence                                | 13-Jan-08     | 4-Jan-18      | 1       | <i>Rhodococcus kroppenstedtii</i>            |                                 | <i>Rhodococcus kroppenstedtii</i>            | 1467   | 0           | K22-05                  | genomic DNA | soil from cold desert                                          |                                    | 1         | 1467     | FALSE   | ncbi_filtered | 293050  |
| EU977670_1_1487                | 293050  | EU977670        | <i>Rhodococcus kroppenstedtii</i> strain ZP9AA 16S ribosomal RNA gene, partial sequence                                 | 8-Jul-13      | 4-Jan-18      | 1       | <i>Rhodococcus kroppenstedtii</i>            |                                 | <i>Rhodococcus kroppenstedtii</i>            | 1487   | 0           | ZP9AA                   | genomic DNA | Kennedy Space Center clean-room floor                          |                                    | 1         | 1387     | FALSE   | ncbi_filtered | 293050  |
| HO860791_1_1317                | 293050  | HO860791        | <i>Rhodococcus kroppenstedtii</i> strain Na57 16S ribosomal RNA gene, partial sequence                                  | 25-Jul-11     | 4-Jan-18      | 1       | <i>Rhodococcus kroppenstedtii</i>            |                                 | <i>Rhodococcus kroppenstedtii</i>            | 1417   | 0           | Na57                    | genomic DNA |                                                                |                                    | 1         | 1417     | FALSE   | ncbi_filtered | 293050  |
| MH016410_1_1256                | 293050  | MH016410        | <i>Rhodococcus kroppenstedtii</i> strain S215 16S ribosomal RNA gene, partial sequence                                  | 11-Mar-18     | 15-Mar-18     | 1       | <i>Rhodococcus kroppenstedtii</i>            |                                 | <i>Rhodococcus kroppenstedtii</i>            | 1256   | 0           | S215                    | genomic DNA |                                                                |                                    | 1         | 1256     | FALSE   | ncbi_filtered | 293050  |
| NZ_F0ND01000026_3669_5190      | 293050  | NZ_F0ND01000026 | <i>Rhodococcus kroppenstedtii</i> strain DSM 44908, whole genome shotgun sequence                                       | 13-Apr-17     | 4-Jan-18      | 1       | <i>Rhodococcus kroppenstedtii</i>            | WGS;RefSeq                      | <i>Rhodococcus kroppenstedtii</i>            | 1522   | 0           | DSM 44908               | genomic DNA |                                                                |                                    | 3669      | 5190     | TRUE    | ncbi_filtered | 293050  |
| AJ832129_1_1391                | 293545  | AJ832129        | <i>Sutterella morbirensis</i> partial 16S rRNA gene, type strain CCUG 49335T                                            | 8-Jan-07      | 4-Jan-18      | 1       | <i>Sutterella morbirensis</i>                | 16S ribosomal RNA;16S rRNA gene | <i>Sutterella morbirensis</i>                | 1391   | 0           | type strain:CCUG 49335T | genomic DNA |                                                                |                                    | 1         | 1391     | FALSE   | ncbi_filtered | 293545  |
| NR_042341_1_1529               | 293647  | NR_042341       | <i>Byssovora cruenta</i> strain By c2 16S ribosomal RNA gene, partial sequence                                          | 3-Feb-15      | 4-Jan-18      | 1       | <i>Byssovora cruenta</i>                     | RefSeq                          | <i>Byssovora cruenta</i>                     | 1529   | 0           | By c2                   | rRNA        |                                                                |                                    | 1         | 1529     | TRUE    | ncbi_filtered | 293647  |
| KM593303_1_1399                | 294699  | KM593303        | <i>Anoxybacillus amylolyticus</i> strain Amajac 16S ribosomal RNA gene, partial sequence                                | 28-Feb-15     | 4-Jan-18      | 1       | <i>Anoxybacillus amylolyticus</i>            |                                 | <i>Anoxybacillus amylolyticus</i>            | 1399   | 0           | Amajac                  | genomic DNA | hot spring                                                     |                                    | 1         | 1399     | FALSE   | ncbi_filtered | 294699  |
| NZ_CP015438_17867_180925       | 294699  | NZ_CP015438     | <i>Anoxybacillus amylolyticus</i> strain DSM 15939, complete genome                                                     | 17-Apr-17     | 4-Jan-18      | 1       | <i>Anoxybacillus amylolyticus</i>            | RefSeq                          | <i>Anoxybacillus amylolyticus</i>            | 1559   | 0           | DSM 15939               | genomic DNA | Soil                                                           |                                    | 179367    | 180925   | TRUE    | ncbi_filtered | 294699  |
| NZ_CP015438_35619_37177        | 294699  | NZ_CP015438     | <i>Anoxybacillus amylolyticus</i> strain DSM 15939, complete genome                                                     | 17-Apr-17     | 4-Jan-18      | 1       | <i>Anoxybacillus amylolyticus</i>            | RefSeq                          | <i>Anoxybacillus amylolyticus</i>            | 1559   | 0           | DSM 15939               | genomic DNA | Soil                                                           |                                    | 35619     | 37177    | TRUE    | ncbi_filtered | 294699  |
| AJ769084_1_1420                | 298708  | AJ769084        | <i>Sphingomonas kaistensis</i> strain PB180 16S ribosomal RNA gene, partial sequence                                    | 17-Jun-09     | 4-Jan-18      | 1       | <i>Sphingomonas kaistensis</i>               |                                 | <i>Sphingomonas kaistensis</i>               | 1420   | 0           | PB180                   | genomic DNA |                                                                |                                    | 1         | 1420     | FALSE   | ncbi_filtered | 298708  |
| AJ785128_1_1393                | 298708  | AJ785128        | <i>Sphingomonas kaistensis</i> strain PB229 16S ribosomal RNA gene, partial sequence                                    | 17-Jun-09     | 4-Jan-18      | 1       | <i>Sphingomonas kaistensis</i>               |                                 | <i>Sphingomonas kaistensis</i>               | 1393   | 0           | PB229                   | genomic DNA |                                                                |                                    | 1         | 1393     | FALSE   | ncbi_filtered | 298708  |
| JG579647_1_1384                | 298708  | JG579647        | <i>Sphingomonas kaistensis</i> strain H11 16S ribosomal RNA gene, partial sequence                                      | 20-Mar-12     | 4-Jan-18      | 1       | <i>Sphingomonas kaistensis</i>               |                                 | <i>Sphingomonas kaistensis</i>               | 1384   | 0           | H11                     | genomic DNA | peanut plant                                                   |                                    | 1         | 1384     | FALSE   | ncbi_filtered | 298708  |
| NR_043171_1_1421               | 298708  | NR_043171       | <i>Sphingomonas kaistensis</i> strain PB56 16S ribosomal RNA gene, partial sequence                                     | 3-Feb-15      | 4-Jan-18      | 1       | <i>Sphingomonas kaistensis</i>               | RefSeq                          | <i>Sphingomonas kaistensis</i>               | 1421   | 0           | PB56                    | rRNA        |                                                                |                                    | 1         | 1421     | TRUE    | ncbi_filtered | 298708  |
| AB675636_1_1501                | 299767  | AB675636        | <i>Enterobacter ludwigii</i> strain K9 16S ribosomal RNA gene, partial sequence                                         | 20-Jan-15     | 4-Jan-18      | 1       | <i>Enterobacter ludwigii</i>                 |                                 | <i>Enterobacter ludwigii</i>                 | 1501   | 2           | 1-Feb                   | genomic DNA | banana                                                         |                                    | 1         | 1501     | FALSE   | ncbi_filtered | 299767  |
| EF175735_1_1505                | 299767  | EF175735        | <i>Enterobacter ludwigii</i> strain 2-1                                                                                 | 16-Jan-07     | 4-Jan-18      | 1       | <i>Enterobacter ludwigii</i>                 |                                 | <i>Enterobacter ludwigii</i>                 | 1505   | 0           | K9                      | genomic DNA | soil                                                           |                                    | 1         | 1505     | FALSE   | ncbi_filtered | 299767  |
| JN700140_1_1442                | 299767  | JN700140        | <i>Enterobacter ludwigii</i> strain L23 16S ribosomal RNA gene, partial sequence                                        | 18-Jan-13     | 4-Jan-18      | 1       | <i>Enterobacter ludwigii</i>                 |                                 | <i>Enterobacter ludwigii</i>                 | 1442   | 0           | L23                     | genomic DNA |                                                                |                                    | 1         | 1442     | FALSE   | ncbi_filtered | 299767  |
| KF254600_1_1423                | 299767  | KF254600        | <i>Enterobacter ludwigii</i> strain 259 (PM/A) 16S ribosomal RNA gene, partial sequence                                 | 26-Feb-15     | 4-Jan-18      | 1       | <i>Enterobacter ludwigii</i>                 |                                 | <i>Enterobacter ludwigii</i>                 | 1423   | 0           | 259 (PM/A)              | genomic DNA | skin surface                                                   |                                    | 1         | 1423     | FALSE   | ncbi_filtered | 299767  |
| KF835771_1_1402                | 299767  | KF835771        | <i>Enterobacter ludwigii</i> strain Z95 16S ribosomal RNA gene, partial sequence                                        | 18-Dec-13     | 4-Jan-18      | 1       | <i>Enterobacter ludwigii</i>                 |                                 | <i>Enterobacter ludwigii</i>                 | 1402   | 0           | Z95                     | genomic DNA | marine                                                         |                                    | 1         | 1402     | FALSE   | ncbi_filtered | 299767  |
| KJ260276_1_1303                | 300181  | KJ260276        | <i>Serratia urelytica</i> strain RC84 16S ribosomal RNA gene, partial sequence                                          | 19-Sep-15     | 4-Jan-18      | 1       | <i>Serratia urelytica</i>                    |                                 | <i>Serratia urelytica</i>                    | 1303   | 2           | RC84                    | genomic DNA | bad guano                                                      |                                    | 1         | 1303     | FALSE   | ncbi_filtered | 300181  |
| KU258284_1_1438                | 300181  | KU258284        | <i>Serratia urelytica</i> strain BL33 16S ribosomal RNA gene, partial sequence                                          | 12-Mar-16     | 4-Jan-18      | 1       | <i>Serratia urelytica</i>                    |                                 | <i>Serratia urelytica</i>                    | 1438   | 0           | BL33                    | genomic DNA | lithic environment                                             |                                    | 1         | 1438     | FALSE   | ncbi_filtered | 300181  |
| NR_042356_1_1479               | 300181  | NR_042356       | <i>Serratia urelytica</i> strain NVA 51 16S ribosomal RNA, partial sequence                                             | 24-Oct-17     | 4-Jan-18      | 1       | <i>Serratia urelytica</i>                    | RefSeq                          | <i>Serratia urelytica</i>                    | 1479   | 0           | NVA 51                  | rRNA        | river water                                                    |                                    | 1         | 1479     | TRUE    | ncbi_filtered | 300181  |
| NZ_YSF01000001_2996235_2997786 | 300181  | NZ_YSF01000001  | <i>Serratia urelytica</i> strain Lr5/4 LG59, utility_0, quiver, whole genome shotgun sequence                           | 17-Apr-17     | 4-Jan-18      | 1       | <i>Serratia urelytica</i>                    | WGS;RefSeq                      | <i>Serratia urelytica</i>                    | 1552   | 0           | Lr5/4                   | genomic DNA | geothermal spring water                                        |                                    | 2996235   | 2997786  | FALSE   | ncbi_filtered | 300181  |
| PGPC01000001_2414721_2416269   | 300181  | PGPC01000001    | <i>Serratia urelytica</i> strain DW2 Contig0, whole genome shotgun sequence                                             | 18-Dec-17     | 4-Jan-18      | 1       | <i>Serratia urelytica</i>                    | WGS                             | <i>Serratia urelytica</i>                    | 1549   | 0           | DW2                     | genomic DNA | rhizosphere                                                    |                                    | 2414721   | 2416269  | FALSE   | ncbi_filtered | 300181  |
| AB365794_1_1322                | 301154  | AB365794        | <i>Sphingomonas oligophenolica</i> gene for 16S rRNA, partial sequence, strain: WR95                                    | 2-Nov-07      | 4-Jan-18      | 1       | <i>Sphingomonas oligophenolica</i>           |                                 | <i>Sphingomonas oligophenolica</i>           | 1322   | 0           | WR95                    | genomic DNA | Granite soil of Korean ginseng rhizosphere                     |                                    | 1         | 1322     | FALSE   | ncbi_filtered | 301154  |
| NR_024685_1_1306               | 301154  | NR_024685       | <i>Sphingomonas oligophenolica</i> strain S213 16S ribosomal RNA gene, partial sequence                                 | 3-Feb-15      | 4-Jan-18      | 1       | <i>Sphingomonas oligophenolica</i>           | RefSeq                          | <i>Sphingomonas oligophenolica</i>           | 1306   | 0           | S213, JCM 12082         | rRNA        |                                                                |                                    | 1         | 1306     | TRUE    | ncbi_filtered | 301154  |
| AB661433_1_1495                | 301302  | AB661433        | <i>Roseburia faecis</i> gene for 16S ribosomal RNA, partial sequence, strain: JCM 17581                                 | 9-Nov-12      | 4-Jan-18      | 1       | <i>Roseburia faecis</i>                      |                                 | <i>Roseburia faecis</i>                      | 1495   | 0           | JCM 17581               | genomic DNA |                                                                |                                    | 1         | 1495     | FALSE   | ncbi_filtered | 301302  |
| AY804149_1_1497                | 301302  | AY804149        | <i>Roseburia faecis</i> strain MG/1 16S ribosomal RNA gene, partial sequence                                            | 18-Feb-09     | 4-Jan-18      | 1       | <i>Roseburia faecis</i>                      |                                 | <i>Roseburia faecis</i>                      | 1497   | 1           | MG/1                    | genomic DNA |                                                                |                                    | 1         | 1497     | FALSE   | ncbi_filtered | 301302  |
| AY804150_1_1497                | 301302  | AY804150        | <i>Roseburia faecis</i> strain M88/1 16S ribosomal RNA gene, partial sequence                                           | 18-Feb-09     | 4-Jan-18      | 1       | <i>Roseburia faecis</i>                      |                                 | <i>Roseburia faecis</i>                      | 1497   | 1           | M88/1                   | genomic DNA |                                                                |                                    | 1         | 1497     | FALSE   | ncbi_filtered | 301302  |
| NZ_CVRR01000056_32_1576        | 301302  | NZ_CVRR01000056 | <i>Roseburia faecis</i> strain M72, whole genome shotgun sequence                                                       | 11-Apr-17     | 4-Jan-18      | 1       | <i>Roseburia faecis</i>                      | WGS;RefSeq                      | <i>Roseburia faecis</i>                      | 1545   | 0           | M72                     | genomic DNA |                                                                |                                    | 32        | 1576     | FALSE   | ncbi_filtered | 301302  |
| NZ_CVY01000011_395_1938        | 301302  | NZ_CVY01000011  | <i>Roseburia faecis</i> strain 27895TDY5608863, whole genome shotgun sequence                                           | 11-Apr-17     | 4-Jan-18      | 1       | <i>Roseburia faecis</i>                      | WGS;RefSeq                      | <i>Roseburia faecis</i>                      | 1544   | 0           | 27895TDY5608863         | genomic DNA | faeces                                                         |                                    | 395       | 1938     | FALSE   | ncbi_filtered | 301302  |
| NR_043093_1_1502               | 302449  | NR_043093       | <i>Corynebacterium tuscaniense</i> strain IS5-5309 16S ribosomal RNA gene, partial sequence                             | 3-Feb-15      | 4-Jan-18      | 1       | <i>Corynebacterium tuscaniense</i>           |                                 | <i>Corynebacterium tuscaniense</i>           | 1502   | 1           | IS5-5309                | rRNA        |                                                                |                                    | 1         | 1502     | TRUE    | ncbi_filtered | 302449  |
| NZ_JNNG01000065_3779_5313      | 1401064 | NZ_JNNG01000065 | <i>Corynebacterium tuscaniense</i> DNFO0037 contig65, whole genome shotgun sequence                                     | 17-Apr-17     | 4-Jan-18      | 1       | <i>Corynebacterium tuscaniense</i> DNFO0037  | WGS;HIGH_QUALITY_DRAFT;RefSeq   | <i>Corynebacterium tuscaniense</i> DNFO0037  | 1535   | 0           | DNFO0037                | genomic DNA | vagina                                                         |                                    | 3779      | 5313     | FALSE   | ncbi_filtered | 302449  |
| PHN601000030_3812_5337         | 102449  | PHN601000030    | <i>Corynebacterium tuscaniense</i> strain UM80792 J1837_8_95_30, whole genome shotgun sequence                          | 10-Jan-18     | 12-Jan-18     | 1       | <i>Corynebacterium tuscaniense</i>           | WGS                             | <i>Corynebacterium tuscaniense</i>           | 1526   | 0           | UM80792                 | genomic DNA | catheter                                                       |                                    | 3812      | 5337     | FALSE   | ncbi_filtered | 302449  |
| AY558030_1_1481                | 60235   | AY558030        | <i>Bradyrhizobium</i> sp. BC-C1 partial 16S rRNA gene, strain BC-C1                                                     | 19-Feb-04     | 4-Jan-18      | 1       | <i>Bradyrhizobium</i>                        |                                 |                                              |        |             |                         |             |                                                                |                                    |           |          |         |               |         |

| seqname                   | tax_id | accession       | description                                                                            | modified_date | download_date | version | num_sources | keywords                                                | organism                                       | length | ambig_count | strain      | mol_type    | isolate                                                        | isolation_source | seq_start | seq_end | is_type | collection    | species |
|---------------------------|--------|-----------------|----------------------------------------------------------------------------------------|---------------|---------------|---------|-------------|---------------------------------------------------------|------------------------------------------------|--------|-------------|-------------|-------------|----------------------------------------------------------------|------------------|-----------|---------|---------|---------------|---------|
| NC_013798.255855_257408   | 637909 | NC_013798       | Streptococcus gallolyticus UCN34 complete genome                                       | 10-Apr-17     | 4-Jan-18      | 1       | 1           | Streptococcus gallolyticus UCN34 RefSeq;complete genome | Streptococcus gallolyticus UCN34               | 1554   | 0           | UCN34       | genomic DNA |                                                                |                  | 35555     | 257408  | FALSE   | ncbi_filtered | 315405  |
| Y10869_1_1371             | 53354  | Y10869          | S.caprius 16S rRNA gene, strain ACM3908                                                | 31-Jan-97     | 4-Jan-18      | 1       | 1           | Streptococcus gallolyticus subsp. gallolyticus          | Streptococcus gallolyticus subsp. gallolyticus | 1371   | 2           | ACM3908     | genomic DNA |                                                                |                  | 1         | 1371    | FALSE   | ncbi_filtered | 315405  |
| AB302929_1_1433           | 315478 | AB302929        | Methylobacterium isibliense gene for 16S rRNA, partial sequence, strain: DSM 17168     | 15-May-08     | 4-Jan-18      | 1       | 1           | Methylobacterium isibliense                             | Methylobacterium isibliense                    | 1433   | 0           | DSM 17168   | genomic DNA |                                                                |                  | 1         | 1433    | FALSE   | ncbi_filtered | 315478  |
| AY341438_1_1467           | 318456 | AY341438        | Photobacterium kishitani strain NCMB 844 16S ribosomal RNA gene, partial sequence      | 24-Jun-09     | 4-Jan-18      | 1       | 1           | Photobacterium kishitani                                | Photobacterium kishitani                       | 1467   | 4           | NCMB 844    | genomic DNA |                                                                |                  | 1         | 1467    | FALSE   | ncbi_filtered | 318456  |
| AV642165_1_1467           | 318456 | AV642165        | Photobacterium kishitani strain calba.3.1 16S ribosomal RNA gene, partial sequence     | 24-Jun-09     | 4-Jan-18      | 1       | 1           | Photobacterium kishitani                                | Photobacterium kishitani                       | 1467   | 3           | calba.3.1   | genomic DNA |                                                                |                  | 1         | 1467    | FALSE   | ncbi_filtered | 318456  |
| JF412253_1_1400           | 318456 | JF412253        | Photobacterium kishitani strain 5-27 16S ribosomal RNA gene, partial sequence          | 2-Apr-11      | 4-Jan-18      | 1       | 1           | Photobacterium kishitani                                | Photobacterium kishitani                       | 1400   | 0           | 5-27        | genomic DNA |                                                                |                  | 1         | 1400    | FALSE   | ncbi_filtered | 318456  |
| NR_042852_1_1461          | 318456 | NR_042852       | Photobacterium kishitani strain pjapo.1.1 16S ribosomal RNA gene, partial sequence     | 3-Feb-15      | 4-Jan-18      | 1       | 1           | Photobacterium kishitani                                | Photobacterium kishitani                       | 1461   | 6           | jjapo.1.1   | rRNA        |                                                                |                  | 1         | 1461    | TRUE    | ncbi_filtered | 318456  |
| PN101000049_3513_5066     | 318456 | PN101000049     | SR664265_1_contig_49, whole genome shotgun sequence                                    | 31-Mar-18     | 2-Apr-18      | 1       | 1           | Photobacterium kishitani                                | Photobacterium kishitani                       | 1554   | 0           | NCIMB 844   | genomic DNA | Skin, Merluccius capensis                                      |                  | 3513      | 5066    | FALSE   | ncbi_filtered | 318456  |
| AB910750_1_1485           | 319644 | AB910750        | Saccharofermentans acetigenes gene for 16S ribosomal RNA, partial sequence             | 21-Feb-14     | 4-Jan-18      | 1       | 1           | Saccharofermentans acetigenes                           | Saccharofermentans acetigenes                  | 1485   | 0           | JCM 14006   | genomic DNA |                                                                |                  | 1         | 1485    | TRUE    | ncbi_filtered | 319644  |
| NR_115340_1_1510          | 319644 | NR_115340       | Saccharofermentans acetigenes strain PG 16S ribosomal RNA, partial sequence            | 24-Oct-17     | 4-Jan-18      | 1       | 1           | Saccharofermentans acetigenes                           | Saccharofermentans acetigenes                  | 1510   | 0           | P6          | rRNA        | UASB reactor                                                   |                  | 1         | 1510    | TRUE    | ncbi_filtered | 319644  |
| AY879301_1_1515           | 321195 | AY879301        | Granulicatella para-adiacens strain O3476079 16S ribosomal RNA gene, partial sequence  | 19-Jan-08     | 4-Jan-18      | 1       | 1           | Granulicatella para-adiacens                            | Granulicatella para-adiacens                   | 1515   | 0           | 3476079     | genomic DNA |                                                                |                  | 1         | 1515    | FALSE   | ncbi_filtered | 321195  |
| JF803551_1_1421           | 321195 | JF803551        | Granulicatella para-adiacens strain CS93 16S ribosomal RNA gene, partial sequence      | 8-May-11      | 4-Jan-18      | 1       | 1           | Granulicatella para-adiacens                            | Granulicatella para-adiacens                   | 1421   | 2           | CS93        | genomic DNA |                                                                |                  | 1         | 1421    | FALSE   | ncbi_filtered | 321195  |
| KP193201_1_1435           | 322095 | KP193201        | Porphyromonas somerae strain KA00683 16S ribosomal RNA gene, partial sequence          | 1-Apr-15      | 4-Jan-18      | 1       | 1           | Porphyromonas somerae                                   | Porphyromonas somerae                          | 1435   | 1           | KA00683     | genomic DNA |                                                                |                  | 1         | 1435    | FALSE   | ncbi_filtered | 322095  |
| NR_043312_1_1466          | 322095 | NR_043312       | Porphyromonas somerae strain DSM 23386 16S ribosomal RNA gene, partial sequence        | 3-Feb-15      | 4-Jan-18      | 1       | 1           | Porphyromonas somerae DSM 23386                         | Porphyromonas somerae DSM 23386                | 1466   | 2           | DSM 23386   | rRNA        | vaginal fluid from subject with bacterial vaginosis            |                  | 1         | 1466    | TRUE    | ncbi_filtered | 322095  |
| NR_113090_1_1486          | 322095 | NR_113090       | Porphyromonas somerae strain JCM 13867 16S ribosomal RNA gene, partial sequence        | 3-Feb-15      | 4-Jan-18      | 1       | 1           | Porphyromonas somerae DSM 23386                         | Porphyromonas somerae DSM 23386                | 1486   | 0           | JCM 13867   | rRNA        |                                                                |                  | 1         | 1486    | TRUE    | ncbi_filtered | 322095  |
| JD045820_1_1475           | 322601 | JD045820        | Dermaococcus barathri strain SDT151 16S ribosomal RNA gene, partial sequence           | 7-Feb-12      | 4-Jan-18      | 1       | 1           | Dermaococcus barathri                                   | Dermaococcus barathri                          | 1475   | 0           | SDT151      | genomic DNA |                                                                |                  | 1         | 1475    | TRUE    | ncbi_filtered | 322601  |
| JD068795_1_1451           | 322601 | JD068795        | Dermaococcus barathri strain SDT1527 16S ribosomal RNA gene, partial sequence          | 13-Feb-12     | 4-Jan-18      | 1       | 1           | Dermaococcus barathri                                   | Dermaococcus barathri                          | 1451   | 0           | SDT1527     | genomic DNA |                                                                |                  | 1         | 1451    | FALSE   | ncbi_filtered | 322601  |
| NR_043261_1_1468          | 322601 | NR_043261       | Dermaococcus barathri strain MT2.1 16S ribosomal RNA gene, partial sequence            | 3-Feb-15      | 4-Jan-18      | 1       | 1           | Dermaococcus barathri                                   | Dermaococcus barathri                          | 1468   | 0           | MT2.1       | rRNA        |                                                                |                  | 1         | 1468    | TRUE    | ncbi_filtered | 322601  |
| HG315623_1_1402           | 322602 | HG315623        | Dermaococcus profundus strain RA19 16S ribosomal RNA gene, partial sequence            | 25-Apr-14     | 4-Jan-18      | 1       | 1           | Dermaococcus profundus                                  | Dermaococcus profundus                         | 1402   | 0           |             | genomic DNA | U9                                                             | lichen           | 1         | 1402    | FALSE   | ncbi_filtered | 322602  |
| JN585681_1_1366           | 322602 | JN585681        | Dermaococcus profundus strain RA19 16S ribosomal RNA gene, partial sequence            | 4-Sep-11      | 4-Jan-18      | 1       | 1           | Dermaococcus profundus                                  | Dermaococcus profundus                         | 1366   | 0           | RA19        | genomic DNA |                                                                |                  | 1         | 1366    | FALSE   | ncbi_filtered | 322602  |
| KP173712_1_1398           | 322602 | KP173712        | Dermaococcus profundus strain SH2.1 16S ribosomal RNA gene, partial sequence           | 28-Mar-15     | 4-Jan-18      | 1       | 1           | Dermaococcus profundus                                  | Dermaococcus profundus                         | 1398   | 0           | SH2.1       | genomic DNA |                                                                |                  | 1         | 1398    | FALSE   | ncbi_filtered | 322602  |
| NR_043262_1_1476          | 322602 | NR_043262       | Dermaococcus profundus strain MT2.2 16S ribosomal RNA gene, partial sequence           | 3-Feb-15      | 4-Jan-18      | 1       | 1           | Dermaococcus profundus                                  | Dermaococcus profundus                         | 1466   | 0           | MT2.2       | rRNA        |                                                                |                  | 1         | 1466    | TRUE    | ncbi_filtered | 322602  |
| MG199044_1_1433           | 322609 | MG199044        | Williamsia marianensis strain Bult 1.1 16S ribosomal RNA gene, partial sequence        | 21-Oct-17     | 4-Jan-18      | 1       | 1           | Williamsia marianensis                                  | Williamsia marianensis                         | 1473   | 4           | Bult 1.1    | genomic DNA | soil                                                           |                  | 1         | 1473    | FALSE   | ncbi_filtered | 322609  |
| NR_043263_1_1457          | 322609 | NR_043263       | Williamsia marianensis strain MT8 16S ribosomal RNA gene, partial sequence             | 3-Feb-15      | 4-Jan-18      | 1       | 1           | Williamsia marianensis                                  | Williamsia marianensis                         | 1457   | 0           | MT8         | rRNA        |                                                                |                  | 1         | 1457    | TRUE    | ncbi_filtered | 322609  |
| NR_118613_1_1372          | 322609 | NR_118613       | Williamsia marianensis strain DSM 4944 16S ribosomal RNA gene, partial sequence        | 3-Feb-15      | 4-Jan-18      | 1       | 1           | Williamsia marianensis                                  | Williamsia marianensis                         | 1372   | 0           | DSM 4944    | rRNA        |                                                                |                  | 1         | 1372    | TRUE    | ncbi_filtered | 322609  |
| HQ699498_1_1436           | 324768 | HQ699498        | Bacillus idriensis strain m4 16S ribosomal RNA gene, partial sequence                  | 1-Dec-12      | 4-Jan-18      | 1       | 1           | Bacillus idriensis                                      | Bacillus idriensis                             | 1436   | 0           | m4          | genomic DNA | sandy soil                                                     |                  | 1         | 1436    | FALSE   | ncbi_filtered | 324768  |
| KU862325_1_1435           | 324768 | KU862325        | Bacillus idriensis strain DBE-4 16S ribosomal RNA gene, partial sequence               | 9-Mar-16      | 4-Jan-18      | 1       | 1           | Bacillus idriensis                                      | Bacillus idriensis                             | 1435   | 0           | DBE-4       | genomic DNA | soybean farming soil in sichuan province                       |                  | 1         | 1435    | FALSE   | ncbi_filtered | 324768  |
| KU921586_1_1485           | 324768 | KU921586        | Bacillus idriensis strain IHBB 9337 16S ribosomal RNA gene, partial sequence           | 22-Oct-16     | 4-Jan-18      | 1       | 1           | Bacillus idriensis                                      | Bacillus idriensis                             | 1485   | 0           | IHBB 9337   | genomic DNA | Chandra Tal Lake Sediment, Lahaul and Spiti, Himachal Pradesh  |                  | 1         | 1485    | FALSE   | ncbi_filtered | 324768  |
| MG651516_1_1424           | 324768 | MG651516        | Bacillus idriensis strain FIAT-46903 16S ribosomal RNA gene, partial sequence          | 13-Dec-17     | 4-Jan-18      | 1       | 1           | Bacillus idriensis                                      | Bacillus idriensis                             | 1424   | 0           | FIAT-46903  | genomic DNA |                                                                |                  | 1         | 1424    | FALSE   | ncbi_filtered | 324768  |
| NR_043268_1_1437          | 324768 | NR_043268       | Bacillus idriensis strain SMC 4352-2 16S ribosomal RNA gene, partial sequence          | 3-Feb-15      | 4-Jan-18      | 1       | 1           | Bacillus idriensis                                      | Bacillus idriensis                             | 1437   | 0           | SMC 4352-2  | rRNA        |                                                                |                  | 1         | 1437    | TRUE    | ncbi_filtered | 324768  |
| AY962684_1_1342           | 327691 | AY962684        | Sphingomonas rhizogenes strain RSB-1 16S ribosomal RNA gene, partial sequence          | 23-Aug-06     | 4-Jan-18      | 2       | 2           | Sphingomonas rhizogenes                                 | Sphingomonas rhizogenes                        | 1342   | 0           | RSB-1       | genomic DNA |                                                                |                  | 1         | 1342    | FALSE   | ncbi_filtered | 327691  |
| GD337015_1_1480           | 328396 | GD337015        | Enterococcus aquimarius strain 551788 16S ribosomal RNA gene, partial sequence         | 5-Aug-09      | 4-Jan-18      | 1       | 1           | Enterococcus aquimarius                                 | Enterococcus aquimarius                        | 1480   | 2           | 551788      | genomic DNA |                                                                |                  | 1         | 1480    | FALSE   | ncbi_filtered | 328396  |
| KU315400_1_1381           | 328396 | KU315400        | Enterococcus aquimarius strain Ln5 16S ribosomal RNA gene, partial sequence            | 14-May-16     | 4-Jan-18      | 1       | 1           | Enterococcus aquimarius                                 | Enterococcus aquimarius                        | 1381   | 0           | Ln5         | genomic DNA | chicken manure                                                 |                  | 1         | 1381    | FALSE   | ncbi_filtered | 328396  |
| NR_042375_1_1510          | 328396 | NR_042375       | Enterococcus aquimarius strain API 8407116 16S ribosomal RNA, partial sequence         | 24-Oct-17     | 4-Jan-18      | 1       | 1           | Enterococcus aquimarius                                 | Enterococcus aquimarius                        | 1510   | 5           | API 8407116 | rRNA        |                                                                |                  | 1         | 1510    | TRUE    | ncbi_filtered | 328396  |
| NZ_LXKX01000005_3114_4680 | 328396 | NZ_LXKX01000005 | Enterococcus aquimarius strain DSM 17690 Scaffold5, whole genome shotgun sequence      | 17-Apr-17     | 4-Jan-18      | 1       | 1           | Enterococcus aquimarius                                 | Enterococcus aquimarius                        | 1567   | 0           | DSM 17690   | genomic DNA | sea water                                                      |                  | 3114      | 4680    | FALSE   | ncbi_filtered | 328396  |
| AY234728_1_1358           | 324267 | AY234728        | Bacterium Ellin6076 16S ribosomal RNA gene, partial sequence                           | 8-Dec-03      | 4-Jan-18      | 1       | 1           | Candidatus Solibacter usitatus Ellin6076                | Candidatus Solibacter usitatus Ellin6076       | 1358   | 0           |             | genomic DNA |                                                                |                  | 1         | 1358    | FALSE   | ncbi_filtered | 332163  |
| NC_008536_1248998_1249603 | 332163 | NC_008536       | Candidatus Solibacter usitatus Ellin6076, complete genome                              | 28-Aug-17     | 4-Jan-18      | 1       | 1           | Candidatus Solibacter usitatus Ellin6076                | Candidatus Solibacter usitatus Ellin6076       | 1506   | 0           | Ellin6076   | genomic DNA |                                                                |                  | 1248998   | 1249603 | FALSE   | ncbi_filtered | 332163  |
| DQ022077_1_1461           | 332249 | DQ022077        | Truopera radiovictrix strain TU-8 16S ribosomal RNA gene, partial sequence             | 19-Jun-05     | 4-Jan-18      | 1       | 1           | Truopera radiovictrix                                   | Truopera radiovictrix                          | 1461   | 1           | TU-8        | genomic DNA |                                                                |                  | 1         | 1461    | FALSE   | ncbi_filtered | 332249  |
| NC_014221_622628_624141   | 332249 | NC_014221       | Truopera radiovictrix DSM 17093, complete genome                                       | 17-Apr-17     | 4-Jan-18      | 1       | 1           | Truopera radiovictrix DSM 17093                         | Truopera radiovictrix DSM 17093                | 1514   | 0           | DSM 17093   | genomic DNA | hot springs runoff                                             |                  | 622628    | 624141  | TRUE    | ncbi_filtered | 332249  |
| NC_014221_86617_88130     | 332249 | NC_014221       | Truopera radiovictrix DSM 17093, complete genome                                       | 17-Apr-17     | 4-Jan-18      | 1       | 1           | Truopera radiovictrix DSM 17093                         | Truopera radiovictrix DSM 17093                | 1514   | 0           | DSM 17093   | genomic DNA | hot springs runoff                                             |                  | 86617     | 88130   | TRUE    | ncbi_filtered | 332249  |
| AB698697_1_1446           | 333297 | AB698697        | Methylobacterium adhaesivum gene for 16S ribosomal RNA, partial sequence, strain: 58c  | 20-Jan-15     | 4-Jan-18      | 1       | 1           | Methylobacterium adhaesivum                             | Methylobacterium adhaesivum                    | 1446   | 0           | 99c         | genomic DNA |                                                                |                  | 1         | 1446    | FALSE   | ncbi_filtered | 333297  |
| AB698698_1_1446           | 333297 | AB698698        | Methylobacterium adhaesivum gene for 16S ribosomal RNA, partial sequence, strain: 58g  | 20-Jan-15     | 4-Jan-18      | 1       | 1           | Methylobacterium adhaesivum                             | Methylobacterium adhaesivum                    | 1446   | 0           | 58g         | genomic DNA |                                                                |                  | 1         | 1446    | FALSE   | ncbi_filtered | 333297  |
| AB698707_1_1444           | 333297 | AB698707        | Methylobacterium adhaesivum gene for 16S ribosomal RNA, partial sequence, strain: 214c | 20-Jan-15     | 4-Jan-18      | 1       | 1           | Methylobacterium adhaesivum                             | Methylobacterium adhaesivum                    | 1444   | 0           | 214c        | genomic DNA |                                                                |                  | 1         | 1444    | FALSE   | ncbi_filtered | 333297  |
| AB698709_1_1444           | 333297 | AB698709        | Methylobacterium adhaesivum gene for 16S ribosomal RNA, partial sequence, strain: 34b  | 20-Jan-15     | 4-Jan-18      | 1       | 1           | Methylobacterium adhaesivum                             | Methylobacterium adhaesivum                    | 1444   | 0           | 34b         | genomic DNA |                                                                |                  | 1         | 1444    | FALSE   | ncbi_filtered | 333297  |
| AB698718_1_1455           | 333297 | AB698718        | Methylobacterium adhaesivum gene for 16S ribosomal RNA, partial sequence, strain: 297c | 20-Jan-15     | 4-Jan-18      | 1       | 1           | Methylobacterium adhaesivum                             | Methylobacterium adhaesivum                    | 1455   | 0           | 297c        | genomic DNA |                                                                |                  | 1         | 1455    | FALSE   | ncbi_filtered | 333297  |
| NR_042200_1_1468          | 333367 | NR_042200       | [Clostridium] asparagiforme strain N6 16S ribosomal RNA, partial sequence              | 24-Oct-17     | 4-Jan-18      | 1       | 1           | [Clostridium] asparagiforme                             | [Clostridium] asparagiforme                    | 1468   | 10          | N6          | rRNA        |                                                                |                  | 1         | 1468    | TRUE    | ncbi_filtered | 333367  |
| NZ_GG657593_2768_4308     | 333367 | NZ_GG657593     | [Clostridium] asparagiforme DSM 15981 Sctd7, whole genome shotgun sequence             | 16-Oct-17     | 4-Jan-18      | 1       | 1           | [Clostridium] asparagiforme DSM 15981                   | [Clostridium] asparagiforme DSM 15981          | 1541   | 0           | DSM 15981   | genomic DNA | biological product (ENV0102000043)                             |                  | 2768      | 4308    | TRUE    | ncbi_filtered | 333367  |
| CP025959_418004_4181926   | 334542 | CP025959        | Rhodococcus qingshengii strain djf-6-2 chromosome, complete genome                     | 22-Jan-18     | 23-Jan-18     | 1       | 1           | Rhodococcus qingshengii                                 | Rhodococcus qingshengii                        | 1523   | 0           | djf-6-2     | genomic DNA |                                                                |                  | 418004    | 4181926 | FALSE   | ncbi_filtered | 334542  |
| JQ684253_1_1483           | 334542 | JQ684253        | Rhodococcus qingshengii strain HWG-A30 16S ribosomal RNA gene, partial sequence        | 19-May-12     | 4-Jan-18      | 1       | 1           | Rhodococcus qingshengii                                 | Rhodococcus qingshengii                        | 1483   | 0           | HWG-A30     | genomic DNA | permafrost soil samples from Kunlun Mountains Pass, Mt. Kunlun |                  | 1         | 1483    | FALSE   | ncbi_filtered | 334542  |
| JX122160_1_1339           | 334542 | JX122160        | Rhodococcus qingshengii strain 43 16S ribosomal RNA gene, partial sequence             | 31-Jul-12     | 4-Jan-18      | 1       | 1           | Rhodococcus qingshengii                                 | Rhodococcus qingshengii                        | 1339   | 0           | 43          | genomic DNA |                                                                |                  | 1         | 1339    | FALSE   | ncbi_filtered | 334542  |
|                           |        |                 |                                                                                        |               |               |         |             |                                                         |                                                |        |             |             |             |                                                                |                  |           |         |         |               |         |

| seqname                      | tax_id  | accession       | description                                                                                       | modified_date | download_date | version_num | source                                | keywords                               | organism                              | length | ambig_count | strain       | mol_type    | isolate | isolation_source                                        | seq_start | seq_stop | is_type | collection    | species |
|------------------------------|---------|-----------------|---------------------------------------------------------------------------------------------------|---------------|---------------|-------------|---------------------------------------|----------------------------------------|---------------------------------------|--------|-------------|--------------|-------------|---------|---------------------------------------------------------|-----------|----------|---------|---------------|---------|
| AB081406_1_1478              | 343517  | AB081406        | Paenibacillus barengoltzii gene for 16S rRNA, partial sequence, strain: NBRC 101216               | 28-Jan-12     | 4-Jan-18      | 1           | Paenibacillus barengoltzii            |                                        | Paenibacillus barengoltzii            | 1478   | 4           | NBRC 101216  | genomic DNA |         |                                                         | 1         | 1478     | FALSE   | ncbi_filtered | 343517  |
| DQ124699_1_1445              | 343517  | DQ124699        | Paenibacillus barengoltzii strain SAFN-125 16S ribosomal RNA gene, partial sequence               | 10-Jul-06     | 4-Jan-18      | 1           | Paenibacillus barengoltzii            |                                        | Paenibacillus barengoltzii            | 1445   | 0           | SAFN-125     | genomic DNA |         |                                                         | 1         | 1445     | FALSE   | ncbi_filtered | 343517  |
| EU088523_1_1314              | 343517  | EU088523        | Paenibacillus barengoltzii strain ES_M541c 16S ribosomal RNA gene, partial sequence               | 26-Jan-11     | 4-Jan-18      | 1           | Paenibacillus barengoltzii            |                                        | Paenibacillus barengoltzii            | 1314   | 3           | ES_M541c     | genomic DNA |         | ESTEC clean room                                        | 1         | 1314     | FALSE   | ncbi_filtered | 343517  |
| GQ284354_1_1445              | 343517  | GQ284354        | Paenibacillus barengoltzii strain THWC57 16S ribosomal RNA gene, partial sequence                 | 29-Jul-09     | 4-Jan-18      | 1           | Paenibacillus barengoltzii            |                                        | Paenibacillus barengoltzii            | 1445   | 0           | THWC57       | genomic DNA |         | sediment sample of natural spring                       | 1         | 1445     | FALSE   | ncbi_filtered | 343517  |
| GQ284360_1_1438              | 343517  | GQ284360        | Paenibacillus barengoltzii strain THWCSN11 16S ribosomal RNA gene, partial sequence               | 29-Jul-09     | 4-Jan-18      | 1           | Paenibacillus barengoltzii            |                                        | Paenibacillus barengoltzii            | 1438   | 0           | THWCSN11     | genomic DNA |         | sediment sample of natural spring                       | 1         | 1438     | FALSE   | ncbi_filtered | 343517  |
| EU977661_1_1355              | 344880  | EU977661        | Sphingomonas dokdonensis strain ZP01AE 16S ribosomal RNA gene, partial sequence                   | 8-Jul-13      | 4-Jan-18      | 1           | Sphingomonas dokdonensis              |                                        | Sphingomonas dokdonensis              | 1355   | 0           | ZP01AE       | genomic DNA |         | Kennedy Space Center clean-room floor                   | 1         | 1355     | FALSE   | ncbi_filtered | 344880  |
| HQ831386_1_1390              | 344880  | HQ831386        | Sphingomonas dokdonensis strain N4-1 16S ribosomal RNA gene, partial sequence                     | 19-Jul-11     | 4-Jan-18      | 1           | Sphingomonas dokdonensis              |                                        | Sphingomonas dokdonensis              | 1390   | 0           | N4-1         | genomic DNA |         |                                                         | 1         | 1390     | FALSE   | ncbi_filtered | 344880  |
| JF459939_1_1365              | 344880  | JF459939        | Sphingomonas dokdonensis strain TZCP8 16S ribosomal RNA gene, partial sequence                    | 12-Mar-13     | 4-Jan-18      | 1           | Sphingomonas dokdonensis              |                                        | Sphingomonas dokdonensis              | 1365   | 0           | TZCP8        | genomic DNA |         | tap water                                               | 1         | 1365     | FALSE   | ncbi_filtered | 344880  |
| JF459955_1_1369              | 344880  | JF459955        | Sphingomonas dokdonensis strain T10BR4 16S ribosomal RNA gene, partial sequence                   | 12-Mar-13     | 4-Jan-18      | 1           | Sphingomonas dokdonensis              |                                        | Sphingomonas dokdonensis              | 1369   | 0           | T10BR4       | genomic DNA |         | tap water                                               | 1         | 1369     | FALSE   | ncbi_filtered | 344880  |
| JX192640_1_1375              | 344880  | JX192640        | Sphingomonas dokdonensis strain MLB-5 16S ribosomal RNA gene, partial sequence                    | 5-Sep-12      | 4-Jan-18      | 1           | Sphingomonas dokdonensis              |                                        | Sphingomonas dokdonensis              | 1375   | 1           | MLB-5        | genomic DNA |         | glacier ice core sample                                 | 1         | 1375     | FALSE   | ncbi_filtered | 344880  |
| F1527678_1_1516              | 345309  | F1527678        | Dyella yejoensis strain r1Z00829 16S ribosomal RNA gene, partial sequence                         | 13-Jan-09     | 4-Jan-18      | 1           | Luteibacter yejoensis                 |                                        | Luteibacter yejoensis                 | 1516   | 0           | r1Z00829     | genomic DNA |         | legume nodule                                           | 1         | 1516     | FALSE   | ncbi_filtered | 345309  |
| KF668474_1_1511              | 345309  | KF668474        | Luteibacter yejoensis strain HB B 6856 16S ribosomal RNA gene, partial sequence                   | 6-May-14      | 4-Jan-18      | 1           | Luteibacter yejoensis                 |                                        | Luteibacter yejoensis                 | 1511   | 0           | HB B 6856    | genomic DNA |         | tree core sample                                        | 1         | 1511     | FALSE   | ncbi_filtered | 345309  |
| KM019785_1_1412              | 345309  | KM019785        | Luteibacter yejoensis strain Z51 16S ribosomal RNA gene, partial sequence                         | 21-Sep-14     | 4-Jan-18      | 1           | Luteibacter yejoensis                 |                                        | Luteibacter yejoensis                 | 1412   | 0           | Z51          | genomic DNA |         | rock                                                    | 1         | 1412     | FALSE   | ncbi_filtered | 345309  |
| KM589039_1_1423              | 345309  | KM589039        | Luteibacter yejoensis strain G-12 16S ribosomal RNA gene, partial sequence                        | 1-Dec-14      | 4-Jan-18      | 1           | Luteibacter yejoensis                 |                                        | Luteibacter yejoensis                 | 1423   | 0           | G-12         | genomic DNA |         | explant roots                                           | 1         | 1423     | FALSE   | ncbi_filtered | 345309  |
| NZ_L2801000066_235_1780      | 345309  | NZ_L2801000066  | Luteibacter yejoensis strain SU11 contig_66, whole genome shotgun sequence                        | 17-Apr-17     | 4-Jan-18      | 1           | Luteibacter yejoensis                 | WGS,RefSeq                             | Luteibacter yejoensis                 | 1546   | 0           | SU11         | genomic DNA |         | river in Endau-Rompin National Park                     | 235       | 1780     | FALSE   | ncbi_filtered | 345309  |
| NR_115716_1_1516             | 122462  | NR_115716       | Corynebacterium marinum strain D7015 16S ribosomal RNA gene, partial sequence                     | 3-Feb-15      | 4-Jan-18      | 1           | Corynebacterium marinum DSM 44953     | RefSeq                                 | Corynebacterium marinum DSM 44953     | 1444   | 0           | D7015        | rRNA        |         |                                                         | 1         | 1444     | TRUE    | ncbi_filtered | 349751  |
| NZ_CP007790_2502966_2504492  | 122462  | NZ_CP007790     | Corynebacterium marinum DSM 44953, complete genome                                                | 17-Apr-17     | 4-Jan-18      | 1           | Corynebacterium marinum DSM 44953     | RefSeq                                 | Corynebacterium marinum DSM 44953     | 1527   | 0           | DSM 44953    | genomic DNA |         | coastal sediment                                        | 2502966   | 2504492  | TRUE    | ncbi_filtered | 349751  |
| NZ_CP007790_623265_624791    | 122462  | NZ_CP007790     | Corynebacterium marinum DSM 44953, complete genome                                                | 17-Apr-17     | 4-Jan-18      | 1           | Corynebacterium marinum DSM 44953     | RefSeq                                 | Corynebacterium marinum DSM 44953     | 1527   | 0           | DSM 44953    | genomic DNA |         | coastal sediment                                        | 623265    | 624791   | TRUE    | ncbi_filtered | 349751  |
| JQ073821_1_1325              | 351091  | JQ073821        | Oscillatoria valericigenes strain AGM2 16S ribosomal RNA gene, partial sequence                   | 27-Jan-13     | 4-Jan-18      | 1           | Oscillatoria valericigenes            |                                        | Oscillatoria valericigenes            | 1325   | 0           | AGM2         | genomic DNA |         | Arabian Sea                                             | 1         | 1325     | FALSE   | ncbi_filtered | 351091  |
| NC_016048_420887_422424      | 693746  | NC_016048       | Oscillatoria valericigenes Sjm18-20 DNA, complete genome                                          | 17-Apr-17     | 4-Jan-18      | 1           | Oscillatoria valericigenes Sjm18-20   | RefSeq                                 | Oscillatoria valericigenes Sjm18-20   | 1538   | 0           | Sjm18-20     | genomic DNA |         |                                                         | 420887    | 422424   | TRUE    | ncbi_filtered | 351091  |
| NR_041340_1_1453             | 351091  | NR_041340       | Oscillatoria valericigenes strain Sjm18-20 16S ribosomal RNA gene, partial sequence               | 3-Feb-15      | 4-Jan-18      | 1           | Oscillatoria valericigenes            | RefSeq                                 | Oscillatoria valericigenes            | 1453   | 0           | Sjm18-20     | rRNA        |         | alimentary canal material from Japanese corbicula clams | 1         | 1453     | TRUE    | ncbi_filtered | 351091  |
| KF228910_1_1524              | 351095  | KF228910        | Paucisalibacillus globulus strain SEP-6 16S ribosomal RNA gene, partial sequence                  | 9-Jun-16      | 4-Jan-18      | 1           | Paucisalibacillus globulus            |                                        | Paucisalibacillus globulus            | 1524   | 0           | SEP-6        | genomic DNA |         |                                                         | 1         | 1524     | FALSE   | ncbi_filtered | 351095  |
| KT898933_1_1217              | 351095  | KT898933        | Paucisalibacillus globulus strain MCB2 16S ribosomal RNA gene, partial sequence                   | 20-Mar-16     | 4-Jan-18      | 1           | Paucisalibacillus globulus            |                                        | Paucisalibacillus globulus            | 1217   | 3           | MCB2         | genomic DNA |         |                                                         | 1         | 1217     | FALSE   | ncbi_filtered | 351095  |
| KT957304_1_1492              | 351095  | KT957304        | Paucisalibacillus globulus strain B22 16S ribosomal RNA gene, partial sequence                    | 3-Nov-15      | 4-Jan-18      | 1           | Paucisalibacillus globulus            |                                        | Paucisalibacillus globulus            | 1492   | 0           | B22          | genomic DNA |         | plant                                                   | 1         | 1492     | FALSE   | ncbi_filtered | 351095  |
| NR_042445_1_1441             | 351095  | NR_042445       | Paucisalibacillus globulus strain B22 16S ribosomal RNA gene, partial sequence                    | 3-Feb-15      | 4-Jan-18      | 1           | Paucisalibacillus globulus            | RefSeq                                 | Paucisalibacillus globulus            | 1441   | 0           | B22          | rRNA        |         | biofilm                                                 | 1         | 1441     | TRUE    | ncbi_filtered | 351095  |
| NZ_L1855389_1_1473           | 351095  | NZ_L1855389     | Paucisalibacillus globulus strain PG, whole genome shotgun sequence                               | 23-Sep-17     | 4-Jan-18      | 1           | Paucisalibacillus globulus            | WGS,RefSeq                             | Paucisalibacillus globulus            | 1473   | 0           | PG           | genomic DNA |         |                                                         | 1         | 1473     | FALSE   | ncbi_filtered | 351095  |
| EU977599_1_1406              | 351215  | EU977599        | Kineococcus marinus strain IPO6MC 16S ribosomal RNA gene, partial sequence                        | 8-Jul-13      | 4-Jan-18      | 1           | Pseudokineococcus marinus             |                                        | Pseudokineococcus marinus             | 1406   | 0           | IPO6MC       | genomic DNA |         | Kennedy Space Center clean-room floor                   | 1         | 1406     | FALSE   | ncbi_filtered | 351215  |
| KU258227_1_1375              | 351215  | KU258227        | Pseudokineococcus marinus strain AL30 16S ribosomal RNA gene, partial sequence                    | 12-Mar-16     | 4-Jan-18      | 1           | Pseudokineococcus marinus             |                                        | Pseudokineococcus marinus             | 1375   | 0           | AL30         | genomic DNA |         | lithic environment                                      | 1         | 1375     | FALSE   | ncbi_filtered | 351215  |
| NR_043632_1_1406             | 351215  | NR_043632       | Pseudokineococcus marinus strain KST3-3 16S ribosomal RNA gene, partial sequence                  | 3-Feb-15      | 4-Jan-18      | 1           | Pseudokineococcus marinus             | RefSeq                                 | Pseudokineococcus marinus             | 1406   | 0           | KST3-3       | rRNA        |         | marine sediment                                         | 1         | 1406     | TRUE    | ncbi_filtered | 351215  |
| NR_043670_1_1488             | 354197  | NR_043670       | Arenimonas malthae strain CC-Y1-16S ribosomal RNA gene, partial sequence                          | 3-Feb-15      | 4-Jan-18      | 1           | Arenimonas malthae                    | RefSeq                                 | Arenimonas malthae                    | 1488   | 0           | CC-Y1-16S    | rRNA        |         |                                                         | 1         | 1488     | TRUE    | ncbi_filtered | 354197  |
| LC258148_1_1472              | 356829  | LC258148        | Bifidobacterium tsurumiense gene for 16S ribosomal RNA, partial sequence, strain: CM 13405        | 14-Apr-17     | 4-Jan-18      | 1           | Bifidobacterium tsurumiense           |                                        | Bifidobacterium tsurumiense           | 1472   | 0           | JOM 13495    | genomic DNA |         |                                                         | 1         | 1472     | TRUE    | ncbi_filtered | 356829  |
| NR_041348_1_1449             | 356829  | NR_041348       | Bifidobacterium tsurumiense strain OMB115 16S ribosomal RNA gene, partial sequence                | 3-Feb-15      | 4-Jan-18      | 1           | Bifidobacterium tsurumiense           | RefSeq                                 | Bifidobacterium tsurumiense           | 1449   | 0           | OMB115       | rRNA        |         |                                                         | 1         | 1449     | TRUE    | ncbi_filtered | 356829  |
| NZ_AU1C0100024_631_2171      | 121211  | NZ_AU1C0100024  | Bifidobacterium tsurumiense DSM 17777 G479204T_scaffolds00023_23_C, whole genome shotgun sequence | 9-Apr-17      | 4-Jan-18      | 1           | Bifidobacterium tsurumiense DSM 17777 | WGS IMPROVED_HIGH_QUALITY_DRAFT_RefSeq | Bifidobacterium tsurumiense DSM 17777 | 1541   | 0           | DSM 17777    | genomic DNA |         |                                                         | 631       | 2171     | TRUE    | ncbi_filtered | 356829  |
| HM368608_1_1274              | 359159  | HM368608        | Nonomuraea candida strain XMU 16S ribosomal RNA gene, partial sequence                            | 11-Oct-10     | 4-Jan-18      | 1           | Nonomuraea candida                    |                                        | Nonomuraea candida                    | 1274   | 0           | XMU          | genomic DNA |         | soil                                                    | 1         | 1274     | FALSE   | ncbi_filtered | 359159  |
| NR_043688_1_1408             | 359159  | NR_043688       | Nonomuraea candida strain HMC10 16S ribosomal RNA gene, partial sequence                          | 3-Feb-15      | 4-Jan-18      | 1           | Nonomuraea candida                    | RefSeq                                 | Nonomuraea candida                    | 1408   | 0           | HMC10        | rRNA        |         |                                                         | 1         | 1408     | TRUE    | ncbi_filtered | 359159  |
| DQ303207_1_1491              | 361101  | DQ303207        | Streptococcus pseudoporcius strain LQ 559-98 16S ribosomal RNA gene, partial sequence             | 11-Jul-06     | 4-Jan-18      | 1           | Streptococcus pseudoporcius           |                                        | Streptococcus pseudoporcius           | 1491   | 2           | LQ 559-98    | genomic DNA |         |                                                         | 1         | 1491     | FALSE   | ncbi_filtered | 361101  |
| JN578440_1_1471              | 361101  | JN578440        | Streptococcus pseudoporcius strain 2144-93 16S ribosomal RNA gene, partial sequence               | 1-Nov-12      | 4-Jan-18      | 1           | Streptococcus pseudoporcius           |                                        | Streptococcus pseudoporcius           | 1471   | 0           | 2144-93      | genomic DNA |         |                                                         | 1         | 1471     | FALSE   | ncbi_filtered | 361101  |
| JN578446_1_1472              | 361101  | JN578446        | Streptococcus pseudoporcius strain 1217-87 16S ribosomal RNA gene, partial sequence               | 1-Nov-12      | 4-Jan-18      | 1           | Streptococcus pseudoporcius           |                                        | Streptococcus pseudoporcius           | 1472   | 0           | 1217-87      | genomic DNA |         |                                                         | 1         | 1472     | FALSE   | ncbi_filtered | 361101  |
| NZ_AEU02000005_343405_344959 | 675093  | NZ_AEU02000005  | Streptococcus pseudoporcius strain LQ 940-04 Contig1216510750, whole genome shotgun sequence      | 7-Apr-17      | 4-Jan-18      | 1           | Streptococcus pseudoporcius LQ 940-04 | WGS,RefSeq                             | Streptococcus pseudoporcius LQ 940-04 | 1555   | 0           | LQ 940-04    | genomic DNA |         |                                                         | 343405    | 344959   | TRUE    | ncbi_filtered | 361101  |
| NZ_FMWC01000009_32121_33674  | 361101  | NZ_FMWC01000009 | Streptococcus pseudoporcius isolate SS-607, whole genome shotgun sequence                         | 17-Apr-17     | 4-Jan-18      | 1           | Streptococcus pseudoporcius           | WGS,RefSeq                             | Streptococcus pseudoporcius           | 1554   | 0           | SS-607       | genomic DNA | Milk    |                                                         | 32121     | 33674    | FALSE   | ncbi_filtered | 361101  |
| GQ284445_1_1413              | 361183  | GQ284445        | Altererythrobracter epoxidivorans strain THWCSN31 16S ribosomal RNA gene, partial sequence        | 29-Jul-09     | 4-Jan-18      | 1           | Altererythrobracter epoxidivorans     |                                        | Altererythrobracter epoxidivorans     | 1413   | 0           | THWCSN31     | genomic DNA |         | sediment sample of natural spring                       | 1         | 1413     | FALSE   | ncbi_filtered | 361183  |
| KC921173_1_1320              | 361183  | KC921173        | Altererythrobracter epoxidivorans strain WY19 16S ribosomal RNA gene, partial sequence            | 31-Aug-13     | 4-Jan-18      | 1           | Altererythrobracter epoxidivorans     |                                        | Altererythrobracter epoxidivorans     | 1320   | 0           | WY19         | genomic DNA |         | ginger foundation soil                                  | 1         | 1320     | FALSE   | ncbi_filtered | 361183  |
| NZ_CP012669_2074798_2076293  | 361183  | NZ_CP012669     | Altererythrobracter epoxidivorans strain CGMCC 1.7731, complete genome                            | 16-Apr-17     | 4-Jan-18      | 1           | Altererythrobracter epoxidivorans     | GSC,MIGS-2.1,RefSeq                    | Altererythrobracter epoxidivorans     | 1496   | 0           | CGMCC 1.7731 | genomic DNA |         | sediment                                                | 2074798   | 2076293  | FALSE   | ncbi_filtered | 361183  |
| NR_041364_1_1488             | 1002367 | NR_041364       | Prevotella stercorea strain CB35 16S ribosomal RNA gene, partial sequence                         | 3-Feb-15      | 4-Jan-18      | 1           | Prevotella stercorea DSM 18206        | RefSeq                                 | Prevotella stercorea DSM 18206        | 1488   | 0           | CB35         | rRNA        |         | human feces                                             | 1         | 1488     | TRUE    | ncbi_filtered | 363265  |
| FN433014_1_1452              | 363631  | FN433014        | Brevundimonas terrae partial 16S rRNA gene, isolate CCM98                                         | 23-Sep-09     | 4-Jan-18      | 1           | Brevundimonas terrae                  |                                        | Brevundimonas terrae                  | 1452   | 0           | genomic DNA  | CCM98       |         | Elephant dung sample                                    | 1         | 1452     | FALSE   | ncbi_filtered | 363631  |
| HM75493_1_1327               | 363631  | HM75493         | Brevundimonas terrae strain C-G-NA6 16S ribosomal RNA gene, partial sequence                      | 23-Aug-13     | 4-Jan-18      | 1           | Brevundimonas terrae                  |                                        | Brevundimonas terrae                  | 1327   | 0           | C-G-NA6      | genomic DNA |         | South Korea: East Sea                                   | 1         | 1327     | FALSE   | ncbi_filtered | 363631  |
| JX12609_1_1418               | 363631  | JX12609         | Brevundimonas terrae strain LC17 16S ribosomal RNA gene, partial sequence                         | 12-Sep-12     | 4-Jan-18      | 1           | Brevundimonas terrae                  |                                        | Brevundimonas terrae                  | 1418   | 0           | LC17         | genomic DNA |         | Chumathang hot springs                                  | 1         | 1418     | FALSE   | ncbi_filtered | 363631  |
| KJ848558_1_1372              | 363631  | KJ848558        | Brevundimonas terrae strain BT 22 16S ribosomal RNA gene, partial sequence                        | 30-Jun-14     | 4-Jan-18      | 1           | Brevundimonas terrae                  |                                        | Brevundimonas terrae                  | 1372   | 0           | BT 22        | genomic DNA |         | gut                                                     | 1         | 1372     | FALSE   | ncbi_filtered | 363631  |
| MG928398_1_1357              | 363631  | MG928398        | Brevundimonas terrae strain MSS281 16S ribosomal RNA gene, partial sequence                       | 15-Feb-18     | 27-Feb-18     | 1           | Brevundimonas terrae                  |                                        | Brevundimonas terrae                  | 1357   | 0           | MSS281       | genomic DNA |         | Panchamirtham                                           | 1         | 1357     | FALSE   | ncbi_filtered | 363631  |
| AB243360_1_1488              | 363845  | AB243360        | Pseudoaeromonas ginsengisoli gene for 16S rRNA, partial sequence, strain: Gsoil 175               | 6-Nov-07      | 4-Jan-18      | 1           | Pseudoaeromonas ginsengisoli          |                                        | Pseudoaeromonas ginsengisoli          | 1488   | 0           | Gsoil 175    | genomic DNA |         |                                                         |           |          |         |               |         |

| seqname                  | tax_id   | accession       | description                                                                            | modified_date | download_date | version_num | source                                                | keywords   | organism                                              | length | ambig_count | strain          | mol_type    | isolate | isolation_source                            | seq_start | seq_stop | is_type | collection    | species |
|--------------------------|----------|-----------------|----------------------------------------------------------------------------------------|---------------|---------------|-------------|-------------------------------------------------------|------------|-------------------------------------------------------|--------|-------------|-----------------|-------------|---------|---------------------------------------------|-----------|----------|---------|---------------|---------|
| NR_043769_1_1446         | 370976   | NR_043769       | Hydrogenophaga caeni strain EMB71 16S ribosomal RNA gene, partial sequence             | 3-Feb-15      | 4-Jan-18      | 1           | Hydrogenophaga caeni                                  | RefSeq     | Hydrogenophaga caeni                                  | 1446   | 0           | EMB71           | rRNA        |         | activated sludge                            | 1         | 1446     | TRUE    | ncbi_filtered | 370976  |
| AF527773_1_1489          | 371674   | AF527773        | Moryella indoligenes strain MDA2477 16S ribosomal RNA gene, partial sequence           | 20-Apr-07     | 4-Jan-18      | 1           | Moryella indoligenes                                  |            | Moryella indoligenes                                  | 1489   | 0           | MDA2477         | genomic DNA |         | human thigh wound                           | 1         | 1489     | FALSE   | ncbi_filtered | 371674  |
| DQ37946_1_1378           | 371674   | DQ37946         | Moryella indoligenes strain AIP 241.03 16S ribosomal RNA gene, partial sequence        | 20-Apr-07     | 4-Jan-18      | 1           | Moryella indoligenes                                  |            | Moryella indoligenes                                  | 1378   | 0           | AIP 241.03      | genomic DNA |         |                                             | 1         | 1378     | FALSE   | ncbi_filtered | 371674  |
| NR_043775_1_1374         | 371674   | NR_043775       | Moryella indoligenes strain AIP 220.04 16S ribosomal RNA gene, partial sequence        | 3-Feb-15      | 4-Jan-18      | 1           | Moryella indoligenes                                  | RefSeq     | Moryella indoligenes                                  | 1374   | 0           | AIP 220.04      | rRNA        |         |                                             | 1         | 1374     | TRUE    | ncbi_filtered | 371674  |
| KF911334_1_1391          | 373040   | KF911334        | Massilia aurea strain HME9229 16S ribosomal RNA gene, partial sequence                 | 25-Feb-14     | 4-Jan-18      | 1           | Massilia aurea                                        |            | Massilia aurea                                        | 1391   | 0           | HME9229         | genomic DNA |         | lagoon                                      | 1         | 1391     | FALSE   | ncbi_filtered | 373040  |
| KF924220_1_1426          | 373040   | KF924220        | Massilia aurea strain HM0416 16S ribosomal RNA gene, partial sequence                  | 25-Feb-14     | 4-Jan-18      | 1           | Massilia aurea                                        |            | Massilia aurea                                        | 1426   | 0           | HM0416          | genomic DNA |         | sediment                                    | 1         | 1426     | FALSE   | ncbi_filtered | 373040  |
| KI047391_1_1468          | 373040   | KI047391        | Massilia aurea strain HMF4544 16S ribosomal RNA gene, partial sequence                 | 19-Aug-17     | 4-Jan-18      | 1           | Massilia aurea                                        |            | Massilia aurea                                        | 1468   | 0           | HMF4544         | genomic DNA |         | wetland                                     | 1         | 1468     | FALSE   | ncbi_filtered | 373040  |
| NR_042502_1_1463         | 373040   | NR_042502       | Massilia aurea strain AP13 16S ribosomal RNA gene, partial sequence                    | 3-Feb-15      | 4-Jan-18      | 1           | Massilia aurea                                        | RefSeq     | Massilia aurea                                        | 1463   | 0           | AP13            | rRNA        |         | drinking water                              | 1         | 1463     | TRUE    | ncbi_filtered | 373040  |
| NR_042501_1_1387         | 373043   | NR_042501       | Roseomonas aquatica strain TR53 16S ribosomal RNA gene, partial sequence               | 3-Feb-15      | 4-Jan-18      | 1           | Roseomonas aquatica                                   | RefSeq     | Roseomonas aquatica                                   | 1387   | 0           | TR53            | rRNA        |         | drinking water                              | 1         | 1387     | TRUE    | ncbi_filtered | 373043  |
| AB698710_1_1444          | 374425   | AB698710        | Methylobacterium komagatae gene for 16S ribosomal RNA, partial sequence, strain: 37e   | 20-Jan-15     | 4-Jan-18      | 1           | Methylobacterium komagatae                            |            | Methylobacterium komagatae                            | 1444   | 0           | 37e             | genomic DNA |         |                                             | 1         | 1444     | FALSE   | ncbi_filtered | 374425  |
| AB703238_1_1449          | 374425   | AB703238        | Methylobacterium komagatae gene for 16S rRNA, partial sequence, strain: 86e            | 20-Jan-15     | 4-Jan-18      | 1           | Methylobacterium komagatae                            |            | Methylobacterium komagatae                            | 1449   | 2           | 86e             | genomic DNA |         |                                             | 1         | 1449     | FALSE   | ncbi_filtered | 374425  |
| GU294327_1_1519          | 374425   | GU294327        | Methylobacterium komagatae strain 9311 16S ribosomal RNA gene, partial sequence        | 27-Jan-10     | 4-Jan-18      | 1           | Methylobacterium komagatae                            |            | Methylobacterium komagatae                            | 1519   | 0           | 9311            | genomic DNA |         | leaf                                        | 1         | 1519     | FALSE   | ncbi_filtered | 374425  |
| GU294331_1_1480          | 374425   | GU294331        | Methylobacterium komagatae strain TN10 16S ribosomal RNA gene, partial sequence        | 27-Jan-10     | 4-Jan-18      | 1           | Methylobacterium komagatae                            |            | Methylobacterium komagatae                            | 1480   | 0           | TN10            | genomic DNA |         | freshwater in rice field                    | 1         | 1480     | FALSE   | ncbi_filtered | 374425  |
| KF241159_1_1448          | 374425   | KF241159        | Methylobacterium komagatae 16S ribosomal RNA gene, partial sequence                    | 1-Jan-14      | 4-Jan-18      | 1           | Methylobacterium komagatae                            |            | Methylobacterium komagatae                            | 1448   | 0           | SC-17           | genomic DNA |         | stem                                        | 1         | 1448     | FALSE   | ncbi_filtered | 374425  |
| AB698674_1_1445          | 374432   | AB698674        | Methylobacterium tardum gene for 16S ribosomal RNA, partial sequence, strain: 227c     | 20-Jan-15     | 4-Jan-18      | 1           | Methylobacterium tardum                               |            | Methylobacterium tardum                               | 1445   | 0           | 227c            | genomic DNA |         |                                             | 1         | 1445     | FALSE   | ncbi_filtered | 374432  |
| KR085941_1_1432          | 374432   | KR085941        | Methylobacterium tardum strain HBB 11162 16S ribosomal RNA gene, partial sequence      | 11-Aug-15     | 4-Jan-18      | 1           | Methylobacterium tardum                               |            | Methylobacterium tardum                               | 1432   | 0           | HBB 11162       | genomic DNA |         | Suraj Tal Lake Water                        | 1         | 1432     | FALSE   | ncbi_filtered | 374432  |
| NR_041443_1_1434         | 374432   | NR_041443       | Methylobacterium tardum strain RB677 16S ribosomal RNA gene, partial sequence          | 3-Feb-15      | 4-Jan-18      | 1           | Methylobacterium tardum                               | RefSeq     | Methylobacterium tardum                               | 1434   | 1           | RB677           | rRNA        |         | water samples food factories                | 1         | 1434     | TRUE    | ncbi_filtered | 374432  |
| KF924228_1_1378          | 375542   | KF924228        | Nocardioides furvisabuli strain M0613 16S ribosomal RNA gene, partial sequence         | 25-Feb-14     | 4-Jan-18      | 1           | Nocardioides furvisabuli                              |            | Nocardioides furvisabuli                              | 1378   | 0           | M0613           | genomic DNA |         | sediment                                    | 1         | 1378     | FALSE   | ncbi_filtered | 375542  |
| NR_043792_1_1398         | 375542   | NR_043792       | Nocardioides furvisabuli strain S85-26 16S ribosomal RNA gene, partial sequence        | 3-Feb-15      | 4-Jan-18      | 1           | Nocardioides furvisabuli                              | RefSeq     | Nocardioides furvisabuli                              | 1398   | 0           | S85-26_BMJ_0429 | rRNA        |         |                                             | 1         | 1398     | TRUE    | ncbi_filtered | 375542  |
| NR_043798_1_1473         | 375926   | NR_043798       | Helicobacter anseris strain MIT 04-9362 16S ribosomal RNA gene, partial sequence       | 3-Feb-15      | 4-Jan-18      | 1           | Helicobacter anseris                                  | RefSeq     | Helicobacter anseris                                  | 1473   | 0           | MIT 04-9362     | rRNA        |         |                                             | 1         | 1473     | TRUE    | ncbi_filtered | 375926  |
| NR_043878_1_1380         | 381630   | NR_043878       | Methylobacterium jeotgali strain S203-9 16S ribosomal RNA gene, partial sequence       | 3-Feb-15      | 4-Jan-18      | 1           | Methylobacterium jeotgali                             | RefSeq     | Methylobacterium jeotgali                             | 1380   | 0           | S203-9          | rRNA        |         | shrimp jeotgal, a Korean fermented sea food | 1         | 1380     | TRUE    | ncbi_filtered | 381630  |
| DQ479501_1_1383          | 382290   | DQ479501        | Catellibacterium terrae 16S ribosomal RNA gene, partial sequence                       | 7-May-06      | 4-Jan-18      | 1           | Catellibacterium terrae                               |            | Catellibacterium terrae                               | 1383   | 0           |                 | genomic DNA |         |                                             | 1         | 1383     | FALSE   | ncbi_filtered | 382290  |
| EI053204_1_1313          | 382290   | EI053204        | Catellibacterium terrae strain QMT-4 16S ribosomal RNA gene, partial sequence          | 15-Aug-07     | 4-Jan-18      | 1           | Catellibacterium terrae                               |            | Catellibacterium terrae                               | 1313   | 0           | QMT-4           | genomic DNA |         |                                             | 1         | 1313     | FALSE   | ncbi_filtered | 382290  |
| KU977287_1_1373          | 382290   | KU977287        | Catellibacterium terrae strain A2 16S ribosomal RNA gene, partial sequence             | 31-Oct-16     | 4-Jan-18      | 1           | Catellibacterium terrae                               |            | Catellibacterium terrae                               | 1373   | 0           | A2              | genomic DNA |         |                                             | 1         | 1373     | FALSE   | ncbi_filtered | 382290  |
| DQ489306_1_1357          | 382725   | DQ489306        | Aquabacterium hongkongensis strain CAS 16S ribosomal RNA gene, partial sequence        | 8-May-06      | 4-Jan-18      | 1           | Aquabacterium hongkongensis                           |            | Aquabacterium hongkongensis                           | 1357   | 0           | CAS             | genomic DNA |         |                                             | 1         | 1357     | FALSE   | ncbi_filtered | 382725  |
| JN082271_1_1460          | 384602   | JN082271        | Micrococcus flavus strain cp50 16S ribosomal RNA gene, partial sequence                | 1-Aug-11      | 4-Jan-18      | 1           | Micrococcus flavus                                    |            | Micrococcus flavus                                    | 1460   | 0           | cp50            | genomic DNA |         | magnette mine drainage                      | 1         | 1460     | FALSE   | ncbi_filtered | 384602  |
| KC134360_1_1390          | 384602   | KC134360        | Micrococcus flavus strain HME8781 16S ribosomal RNA gene, partial sequence             | 17-Oct-14     | 4-Jan-18      | 2           | Micrococcus flavus                                    |            | Micrococcus flavus                                    | 1390   | 0           | HME8781         | genomic DNA |         | tidal flat                                  | 1         | 1390     | FALSE   | ncbi_filtered | 384602  |
| KM108306_1_1408          | 384602   | KM108306        | Micrococcus flavus strain P55 16S ribosomal RNA gene, partial sequence                 | 8-Oct-14      | 4-Jan-18      | 1           | Micrococcus flavus                                    |            | Micrococcus flavus                                    | 1408   | 0           | P55             | genomic DNA |         | lead/zinc contaminated soil                 | 1         | 1408     | FALSE   | ncbi_filtered | 384602  |
| KP191999_1_1447          | 384602   | KP191999        | Micrococcus flavus strain BGSLP21 16S ribosomal RNA gene, partial sequence             | 15-Jul-15     | 4-Jan-18      | 1           | Micrococcus flavus                                    |            | Micrococcus flavus                                    | 1417   | 0           | BGSLP21         | genomic DNA |         | permafrost soil                             | 1         | 1417     | FALSE   | ncbi_filtered | 384602  |
| MH027616_1_1414          | 384602   | MH027616        | Micrococcus flavus strain BM1-2 16S ribosomal RNA gene, partial sequence               | 12-Mar-18     | 15-Mar-18     | 1           | Micrococcus flavus                                    |            | Micrococcus flavus                                    | 1444   | 0           | BM1-2           | genomic DNA |         | Sea mud                                     | 1         | 1444     | FALSE   | ncbi_filtered | 384602  |
| KF923458_1_1484          | 386302   | KF923458        | Salinibacterium xinjiangense strain 48 16S ribosomal RNA gene, partial sequence        | 19-Mar-14     | 4-Jan-18      | 1           | Salinibacterium xinjiangense                          |            | Salinibacterium xinjiangense                          | 1484   | 0           | 48              | genomic DNA |         | permafrost soils                            | 1         | 1484     | FALSE   | ncbi_filtered | 386302  |
| KR085868_1_1469          | 386302   | KR085868        | Salinibacterium xinjiangense strain HBB 11168 16S ribosomal RNA gene, partial sequence | 11-Aug-15     | 4-Jan-18      | 1           | Salinibacterium xinjiangense                          |            | Salinibacterium xinjiangense                          | 1469   | 0           | HBB 11168       | genomic DNA |         | Chandra Tal Lake Water                      | 1         | 1469     | FALSE   | ncbi_filtered | 386302  |
| NZ_OCST01000007_274_1800 | 386302   | NZ_OCST01000007 | Salinibacterium xinjiangense strain CGMCC 1.05381, whole genome shotgun sequence       | 12-Oct-17     | 4-Jan-18      | 1           | Salinibacterium xinjiangense                          | WGS/RefSeq | Salinibacterium xinjiangense                          | 1527   | 0           | CGMCC 1.05381   | genomic DNA |         |                                             | 274       | 1800     | FALSE   | ncbi_filtered | 386302  |
| JN867321_1_1416          | 386414   | JN867321        | Prevotella timonensis strain SEQ251 16S ribosomal RNA gene, partial sequence           | 30-Mar-12     | 4-Jan-18      | 1           | Prevotella timonensis                                 |            | Prevotella timonensis                                 | 1416   | 3           | SEQ251          | genomic DNA |         | human clinical isolate                      | 1         | 1416     | FALSE   | ncbi_filtered | 386414  |
| NBAX01000006_1749_3284   | 386414   | NBAX01000006    | Prevotella timonensis strain DNF00076 Contig_6, whole genome shotgun sequence          | 22-Jan-18     | 23-Jan-18     | 1           | Prevotella timonensis                                 | WGS        | Prevotella timonensis                                 | 1536   | 0           | DNF00076        | genomic DNA |         | vagina                                      | 1749      | 3284     | FALSE   | ncbi_filtered | 386414  |
| NBAX01000015_1_1323      | 386414   | NBAX01000015    | Prevotella timonensis strain DNF00076 Contig_15, whole genome shotgun sequence         | 22-Jan-18     | 23-Jan-18     | 1           | Prevotella timonensis                                 | WGS        | Prevotella timonensis                                 | 1323   | 0           | DNF00076        | genomic DNA |         | vagina                                      | 1         | 1323     | FALSE   | ncbi_filtered | 386414  |
| NR_113123_1_1493         | 386414   | NR_113123       | Prevotella timonensis strain 4401737 + DSM 22865 + JCM 15640                           | 3-Feb-15      | 4-Jan-18      | 1           | Prevotella timonensis 4401737 + DSM 22865 + JCM 15640 | RefSeq     | Prevotella timonensis 4401737 + DSM 22865 + JCM 15640 | 1493   | 0           | 4401737         | rRNA        |         |                                             | 1         | 1493     | TRUE    | ncbi_filtered | 386414  |
| NZ_ADEF01000012_21_1556  | 386414   | NZ_ADEF01000012 | Prevotella timonensis strain CRIS SC-B1 contig00064, whole genome shotgun sequence     | 15-Nov-17     | 4-Jan-18      | 1           | Prevotella timonensis CRIS SC-B1                      | WGS/RefSeq | Prevotella timonensis CRIS SC-B1                      | 1456   | 0           | CRIS SC-B1      | genomic DNA |         | biological product (EWO:02000043)           | 21        | 1556     | FALSE   | ncbi_filtered | 386414  |
| EI419941_1_1365          | 388280   | EI419941        | Cyclobacterium lanium strain HW9 16S ribosomal RNA gene, partial sequence              | 10-Feb-08     | 4-Jan-18      | 1           | Cyclobacterium lanium                                 |            | Cyclobacterium lanium                                 | 1365   | 0           | RW54            | genomic DNA |         | shrimp rearing tank                         | 1         | 1365     | FALSE   | ncbi_filtered | 388280  |
| NR_043903_1_1485         | 388280   | NR_043903       | Cyclobacterium lanium strain HY9 16S ribosomal RNA gene, partial sequence              | 3-Feb-15      | 4-Jan-18      | 1           | Cyclobacterium lanium                                 | RefSeq     | Cyclobacterium lanium                                 | 1485   | 0           | HY9             | rRNA        |         |                                             | 1         | 1485     | TRUE    | ncbi_filtered | 388280  |
| JN25747_1_1395           | 388357   | JN25747         | Kocuria turfansenis strain KK7 16S ribosomal RNA gene, partial sequence                | 10-Aug-11     | 4-Jan-18      | 1           | Kocuria turfansenis                                   |            | Kocuria turfansenis                                   | 1395   | 2           | KK7             | genomic DNA |         | soil                                        | 1         | 1395     | FALSE   | ncbi_filtered | 388357  |
| JY96446_1_1335           | 388357   | JY96446         | Kocuria turfansenis strain MBW3 16S ribosomal RNA gene, partial sequence               | 19-Nov-12     | 4-Jan-18      | 1           | Kocuria turfansenis                                   |            | Kocuria turfansenis                                   | 1335   | 0           | MBW3            | genomic DNA |         | gut                                         | 1         | 1335     | FALSE   | ncbi_filtered | 388357  |
| JY96461_1_1513           | 388357   | JY96461         | Kocuria turfansenis strain MBW16 16S ribosomal RNA gene, partial sequence              | 19-Nov-12     | 4-Jan-18      | 1           | Kocuria turfansenis                                   |            | Kocuria turfansenis                                   | 1513   | 0           | MBW16           | genomic DNA |         | gut                                         | 1         | 1513     | FALSE   | ncbi_filtered | 388357  |
| LC040954_1_1470          | 388357   | LC040954        | Kocuria turfansenis gene for 16S ribosomal RNA, partial sequence                       | 3-Apr-15      | 4-Jan-18      | 1           | Kocuria turfansenis                                   |            | Kocuria turfansenis                                   | 1470   | 0           | GS-4            | genomic DNA |         | groundnut                                   | 1         | 1470     | FALSE   | ncbi_filtered | 388357  |
| MF769333_1_1453          | 388357   | MF769333        | Kocuria turfansenis strain iso4 16S ribosomal RNA gene, partial sequence               | 2-Sep-17      | 4-Jan-18      | 1           | Kocuria turfansenis                                   |            | Kocuria turfansenis                                   | 1453   | 0           | iso4            | genomic DNA |         | soil                                        | 1         | 1453     | FALSE   | ncbi_filtered | 388357  |
| KF146348_1_1435          | 392565   | KF146348        | Emticicia sp. IMCC1731 16S ribosomal RNA gene, partial sequence                        | 19-May-16     | 4-Jan-18      | 1           | Emticicia sp. IMCC1731                                |            | Emticicia sp. IMCC1731                                | 1435   | 0           | IMCC1731        | genomic DNA |         | seawater                                    | 1         | 1435     | TRUE    | ncbi_filtered | 392565  |
| KU360719_1_1464          | 392593   | KU360719        | Inhella inkyongensis strain BK-179 16S ribosomal RNA gene, partial sequence            | 31-Oct-17     | 4-Jan-18      | 1           | Inhella inkyongensis                                  |            | Inhella inkyongensis                                  | 1464   | 0           | BK-179          | genomic DNA |         | freshwater                                  | 1         | 1464     | FALSE   | ncbi_filtered | 392593  |
| NR_043920_1_1472         | 392593   | NR_043920       | Inhella inkyongensis strain IMCC1713 16S ribosomal RNA gene, partial sequence          | 3-Feb-15      | 4-Jan-18      | 1           | Inhella inkyongensis                                  | RefSeq     | Inhella inkyongensis                                  | 1472   | 0           | IMCC1713        | rRNA        |         | freshwater pond                             | 1         | 1472     | TRUE    | ncbi_filtered | 392593  |
| NR_114244_1_1454         | 392593   | NR_114244       | Inhella inkyongensis strain NBRC 103252 16S ribosomal RNA gene, partial sequence       | 3-Feb-15      | 4-Jan-18      | 1           | Inhella inkyongensis                                  | RefSeq     | Inhella inkyongensis                                  | 1454   | 1           | NBRC 103252     | rRNA        |         |                                             | 1         | 1454     | TRUE    | ncbi_filtered | 392593  |
| JN412065_1_1410          | 393664   | JN412065        | Rhizobium cellulolyticum strain G-179 16S ribosomal RNA gene, partial sequence         | 4-Oct-11      | 4-Jan-18      | 1           | Rhizobium cellulolyticum                              |            | Rhizobium cellulolyticum                              | 1410   | 0           | G-179           | genomic DNA |         |                                             | 1         | 1410     | FALSE   | ncbi_filtered | 393664  |
| JG660020_1_1434          | 393664   | JG660020        | Rhizobium cellulolyticum strain S1-23 16S ribosomal RNA gene, partial sequence         | 23-Dec-15     | 4-Jan-18      | 1           | Rhizobium cellulolyticum                              |            | Rhizobium cellulolyticum                              | 1434   | 0           | S1-23           | genomic DNA |         | plant tissue                                | 1         | 1434     | FALSE   | ncbi_filtered | 393664  |
| KF439834_1_1483          | 393664</ |                 |                                                                                        |               |               |             |                                                       |            |                                                       |        |             |                 |             |         |                                             |           |          |         |               |         |

| seqname                         | tax_id  | accession       | description                                                                                 | modified_date | download_date | version | num | source                                      | keywords   | organism                                    | length | ambig | count | strain          | mol_type    | isolate                                                                                                             | isolation_source | seq_start | seq_stop | is_type | collection    | species |
|---------------------------------|---------|-----------------|---------------------------------------------------------------------------------------------|---------------|---------------|---------|-----|---------------------------------------------|------------|---------------------------------------------|--------|-------|-------|-----------------|-------------|---------------------------------------------------------------------------------------------------------------------|------------------|-----------|----------|---------|---------------|---------|
| NZ_CP00644_6047750_6049245      | 1123269 | NZ_CP00644      | Sphingomonas sanxanigenens NX02, complete genome                                            | 17-Apr-17     | 4-Jan-18      | 1       |     | Sphingomonas sanxanigenens DSM 19645 = NX02 | RefSeq     | Sphingomonas sanxanigenens DSM 19645 = NX02 | 1496   | 0     |       | NX02            | genomic DNA |                                                                                                                     |                  | 604750    | 6049245  | TRUE    | ncbi_filtered | 397260  |
| NR_041505_1_1469                | 398049  | NR_041505       | Mucilaginibacter daejeonensis strain Jip 10 16S ribosomal RNA gene, partial sequence        | 3-Feb-15      | 4-Jan-18      | 1       |     | Mucilaginibacter daejeonensis               | RefSeq     | Mucilaginibacter daejeonensis               | 1469   | 0     |       | Jip 10          | rRNA        | Soil of the ginseng field                                                                                           |                  | 1         | 1469     | TRUE    | ncbi_filtered | 398049  |
| DQ88831_1_1418                  | 400092  | DQ88831         | Pontibacter korlensis strain X19-1 16S ribosomal RNA gene, partial sequence                 | 26-Sep-08     | 4-Jan-18      | 1       |     | Pontibacter korlensis                       | RefSeq     | Pontibacter korlensis                       | 1418   | 0     |       | X19-1           | genomic DNA |                                                                                                                     |                  | 1         | 1418     | FALSE   | ncbi_filtered | 400092  |
| KT326321_1_1416                 | 400092  | KT326321        | Pontibacter korlensis strain SBK47 16S ribosomal RNA gene, partial sequence                 | 24-Oct-15     | 4-Jan-18      | 1       |     | Pontibacter korlensis                       | RefSeq     | Pontibacter korlensis                       | 1416   | 0     |       | SBK47           | genomic DNA | coastal water                                                                                                       |                  | 1         | 1416     | FALSE   | ncbi_filtered | 400092  |
| NZ_CP009621_3461378_3462907     | 400092  | NZ_CP009621     | Pontibacter korlensis strain X14-1T, complete genome                                        | 17-Apr-17     | 4-Jan-18      | 1       |     | Pontibacter korlensis                       | RefSeq     | Pontibacter korlensis                       | 1530   | 0     |       | X14-1T          | genomic DNA | desert                                                                                                              |                  | 3461378   | 3462907  | TRUE    | ncbi_filtered | 400092  |
| FJ392017_1_1341                 | 401472  | FJ392017        | Corynebacterium urelicelerivorans strain CNM462/06 16S ribosomal RNA gene, partial sequence | 22-Nov-08     | 4-Jan-18      | 1       |     | Corynebacterium urelicelerivorans           | RefSeq     | Corynebacterium urelicelerivorans           | 1341   | 0     |       | CNM462/06       | genomic DNA |                                                                                                                     |                  | 1         | 1341     | FALSE   | ncbi_filtered | 401472  |
| NZ_CP009215_1123818_1125150     | 401472  | NZ_CP009215     | Corynebacterium urelicelerivorans strain IMMIB RIV-2301, complete genome                    | 17-Apr-17     | 4-Jan-18      | 1       |     | Corynebacterium urelicelerivorans           | RefSeq     | Corynebacterium urelicelerivorans           | 1333   | 0     |       | IMMIB RIV-2301  | genomic DNA | blood culture                                                                                                       |                  | 1123818   | 1125150  | TRUE    | ncbi_filtered | 401472  |
| NZ_CP009215_1840604_1842131     | 401472  | NZ_CP009215     | Corynebacterium urelicelerivorans strain IMMIB RIV-2301, complete genome                    | 17-Apr-17     | 4-Jan-18      | 1       |     | Corynebacterium urelicelerivorans           | RefSeq     | Corynebacterium urelicelerivorans           | 1528   | 0     |       | IMMIB RIV-2301  | genomic DNA | blood culture                                                                                                       |                  | 1840604   | 1842131  | TRUE    | ncbi_filtered | 401472  |
| KM891547_1_1382                 | 402596  | KM891547        | Nocardioides exalbidus strain DS1-26 16S ribosomal RNA gene, partial sequence               | 14-Feb-15     | 4-Jan-18      | 1       |     | Nocardioides exalbidus                      | RefSeq     | Nocardioides exalbidus                      | 1382   | 0     |       | DS1-26          | genomic DNA | floral nectar                                                                                                       |                  | 1         | 1382     | FALSE   | ncbi_filtered | 402596  |
| NR_041526_1_1453                | 402596  | NR_041526       | Nocardioides exalbidus strain RC825 16S ribosomal RNA gene, partial sequence                | 3-Feb-15      | 4-Jan-18      | 1       |     | Nocardioides exalbidus                      | RefSeq     | Nocardioides exalbidus                      | 1453   | 0     |       | RC825           | rRNA        |                                                                                                                     |                  | 1         | 1453     | TRUE    | ncbi_filtered | 402596  |
| NZ_FRNT01000002_3897907_3899432 | 402596  | NZ_FRNT01000002 | Nocardioides exalbidus strain DSM 22017, whole genome shotgun sequence                      | 29-Jul-17     | 4-Jan-18      | 1       |     | Nocardioides exalbidus                      | WGS,RefSeq | Nocardioides exalbidus                      | 1526   | 0     |       | DSM 22017       | genomic DNA |                                                                                                                     |                  | 3897907   | 3899432  | FALSE   | ncbi_filtered | 402596  |
| NR_044022_1_1514                | 404403  | NR_044022       | Howardella urelytica strain GPC 589 16S ribosomal RNA, partial sequence                     | 24-Oct-17     | 4-Jan-18      | 2       |     | Howardella urelytica                        | RefSeq     | Howardella urelytica                        | 1514   | 0     |       | GPC 589         | rRNA        | rumen                                                                                                               |                  | 1         | 1514     | TRUE    | ncbi_filtered | 404403  |
| AB275605_1_1428                 | 405438  | AB275605        | Sphingomonas boseensis gene for 16S rRNA, partial sequence                                  | 28-Mar-07     | 4-Jan-18      | 1       |     | Sphingomonas boseensis                      | RefSeq     | Sphingomonas boseensis                      | 1428   | 0     |       | WF3             | genomic DNA |                                                                                                                     |                  | 1         | 1428     | FALSE   | ncbi_filtered | 405438  |
| AM006442_1_1392                 | 407234  | AM006442        | Rhodobacter vinaykumarii partial 16S rRNA gene, strain JA29                                 | 18-Feb-15     | 4-Jan-18      | 1       |     | Rhodobacter vinaykumarii                    | RefSeq     | Rhodobacter vinaykumarii                    | 1392   | 0     |       | JA29            | genomic DNA | marine tidal water                                                                                                  |                  | 1         | 1392     | FALSE   | ncbi_filtered | 407234  |
| NR_042572_1_1387                | 407234  | NR_042572       | Rhodobacter vinaykumarii strain JA123 16S ribosomal RNA gene, partial sequence              | 3-Feb-15      | 4-Jan-18      | 1       |     | Rhodobacter vinaykumarii                    | RefSeq     | Rhodobacter vinaykumarii                    | 1387   | 0     |       | JA123           | rRNA        | marine tidal waters                                                                                                 |                  | 1         | 1387     | TRUE    | ncbi_filtered | 407234  |
| NZ_FTDM01000018_229_1699        | 407234  | NZ_FTDM01000018 | Rhodobacter vinaykumarii strain DSM 18714, whole genome shotgun sequence                    | 17-Apr-17     | 4-Jan-18      | 1       |     | Rhodobacter vinaykumarii                    | WGS,RefSeq | Rhodobacter vinaykumarii                    | 1471   | 0     |       | DSM 18714       | genomic DNA |                                                                                                                     |                  | 229       | 1699     | TRUE    | ncbi_filtered | 407234  |
| AB648958_1_1485                 | 409290  | AB648958        | Arthro bacter oryzae gene for 16S rRNA, partial sequence, strain: S32117                    | 29-Jul-11     | 4-Jan-18      | 1       |     | Arthro bacter oryzae                        | RefSeq     | Arthro bacter oryzae                        | 1485   | 0     |       | S32117          | genomic DNA | paddy soil in experimental farm                                                                                     |                  | 1         | 1485     | FALSE   | ncbi_filtered | 409290  |
| EU086778_1_1448                 | 409290  | EU086778        | Arthro bacter oryzae strain O1-0266 16S ribosomal RNA gene, partial sequence                | 4-Nov-13      | 4-Jan-18      | 1       |     | Arthro bacter oryzae                        | RefSeq     | Arthro bacter oryzae                        | 1448   | 0     |       | O1-0266         | genomic DNA |                                                                                                                     |                  | 1         | 1448     | FALSE   | ncbi_filtered | 409290  |
| KC77368_1_1431                  | 409290  | KC77368         | Arthro bacter oryzae strain BG83 16S ribosomal RNA gene, partial sequence                   | 2-Jul-13      | 4-Jan-18      | 1       |     | Arthro bacter oryzae                        | RefSeq     | Arthro bacter oryzae                        | 1431   | 0     |       | BG83            | genomic DNA | soil                                                                                                                |                  | 1         | 1431     | FALSE   | ncbi_filtered | 409290  |
| KF424279_1_1432                 | 409290  | KF424279        | Arthro bacter oryzae strain OR205 16S ribosomal RNA gene, partial sequence                  | 31-Jul-13     | 4-Jan-18      | 1       |     | Arthro bacter oryzae                        | RefSeq     | Arthro bacter oryzae                        | 1432   | 0     |       | OR205           | genomic DNA | agricultural field frozen soil in winter                                                                            |                  | 1         | 1432     | FALSE   | ncbi_filtered | 409290  |
| KR140252_1_1352                 | 409290  | KR140252        | Arthro bacter oryzae strain NIES-75 16S ribosomal RNA gene, partial sequence                | 30-Jun-16     | 4-Jan-18      | 1       |     | Arthro bacter oryzae                        | RefSeq     | Arthro bacter oryzae                        | 1352   | 0     |       | NIES-75         | genomic DNA |                                                                                                                     |                  | 1         | 1352     | FALSE   | ncbi_filtered | 409290  |
| NR_044048_1_1453                | 470146  | NR_044048       | Coprococcus comes strain ATCC 27758 16S ribosomal RNA gene, partial sequence                | 3-Feb-15      | 4-Jan-18      | 1       |     | Coprococcus comes                           | RefSeq     | Coprococcus comes ATCC 27758                | 1453   | 3     |       | ATCC 27758      | rRNA        |                                                                                                                     |                  | 1         | 1453     | TRUE    | ncbi_filtered | 410072  |
| NZ_CYXR01000022_1_1338          | 410072  | NZ_CYXR01000022 | Coprococcus comes strain 27895TDY5834962, whole genome shotgun sequence                     | 11-Apr-17     | 4-Jan-18      | 1       |     | Coprococcus comes                           | WGS,RefSeq | Coprococcus comes                           | 1338   | 0     |       | 27895TDY5834962 | genomic DNA | faeces                                                                                                              |                  | 1         | 1338     | FALSE   | ncbi_filtered | 410072  |
| NZ_CYVNO1000006_175999_175737   | 410072  | NZ_CYVNO1000006 | Coprococcus comes strain 27895TDY5608832, whole genome shotgun sequence                     | 11-Apr-17     | 4-Jan-18      | 1       |     | Coprococcus comes                           | WGS,RefSeq | Coprococcus comes                           | 1539   | 0     |       | 27895TDY5608832 | genomic DNA | faeces                                                                                                              |                  | 175999    | 175737   | FALSE   | ncbi_filtered | 410072  |
| NZ_GG662006_48305_49843         | 470146  | NZ_GG662006     | Coprococcus comes ATCC 27758 Sclt1, whole genome shotgun sequence                           | 7-Apr-17      | 4-Jan-18      | 1       |     | Coprococcus comes                           | WGS,RefSeq | Coprococcus comes ATCC 27758                | 1539   | 0     |       | ATCC 27758      | genomic DNA | biological product [ENVO:02000043]                                                                                  |                  | 48305     | 49843    | TRUE    | ncbi_filtered | 410072  |
| NR_115885_1_1404                | 411567  | NR_115885       | Peptoniphilus gorbachii strain WAL 10418 16S ribosomal RNA gene, partial sequence           | 3-Feb-15      | 4-Jan-18      | 1       |     | Peptoniphilus gorbachii                     | RefSeq     | Peptoniphilus gorbachii                     | 1404   | 0     |       | WAL 10418       | rRNA        |                                                                                                                     |                  | 1         | 1404     | TRUE    | ncbi_filtered | 411567  |
| NR_115887_1_1388                | 411577  | NR_115887       | Anaerococcus murdochii strain WAL 17230 16S ribosomal RNA gene, partial sequence            | 3-Feb-15      | 4-Jan-18      | 1       |     | Anaerococcus murdochii                      | RefSeq     | Anaerococcus murdochii                      | 1388   | 0     |       | WAL 17230       | rRNA        |                                                                                                                     |                  | 1         | 1388     | TRUE    | ncbi_filtered | 411577  |
| AB682419_1_1439                 | 416016  | AB682419        | Flavobacterium cucumis gene for 16S rRNA, partial sequence, strain: NBRC 106403             | 28-Jan-12     | 4-Jan-18      | 1       |     | Flavobacterium cucumis                      | RefSeq     | Flavobacterium cucumis                      | 1439   | 1     |       | NBRC 106403     | genomic DNA |                                                                                                                     |                  | 1         | 1439     | FALSE   | ncbi_filtered | 416016  |
| NR_044107_1_1439                | 416016  | NR_044107       | Flavobacterium cucumis strain R245-3 16S ribosomal RNA gene, partial sequence               | 3-Feb-15      | 4-Jan-18      | 1       |     | Flavobacterium cucumis                      | RefSeq     | Flavobacterium cucumis                      | 1439   | 1     |       | R245-3          | rRNA        |                                                                                                                     |                  | 1         | 1439     | TRUE    | ncbi_filtered | 416016  |
| NZ_FRKY01000009_465_1984        | 417745  | NZ_FRKY01000009 | Flavobacterium cucumis strain DSM 18830, whole genome shotgun sequence                      | 17-Apr-17     | 4-Jan-18      | 1       |     | Flavobacterium cucumis                      | WGS,RefSeq | Flavobacterium cucumis                      | 1520   | 0     |       | DSM 18830       | genomic DNA |                                                                                                                     |                  | 465       | 1984     | TRUE    | ncbi_filtered | 416016  |
| AB638431_1_1287                 | 417745  | AB638431        | Shinella kummerowiae gene for 16S ribosomal RNA, partial sequence, strain: F                | 9-Jun-11      | 4-Jan-18      | 1       |     | Shinella kummerowiae                        | RefSeq     | Shinella kummerowiae                        | 1287   | 0     |       | F               | genomic DNA | soil                                                                                                                |                  | 1         | 1287     | FALSE   | ncbi_filtered | 417745  |
| FJ154090_1_1405                 | 417745  | FJ154090        | Shinella kummerowiae strain CCNWS0228 16S ribosomal RNA gene, partial sequence              | 9-Nov-11      | 4-Jan-18      | 1       |     | Shinella kummerowiae                        | RefSeq     | Shinella kummerowiae                        | 1405   | 0     |       | CCNWS0228       | genomic DNA | soil                                                                                                                |                  | 1         | 1405     | FALSE   | ncbi_filtered | 417745  |
| LC177119_1_1440                 | 417745  | LC177119        | Shinella kummerowiae strain IRNB-274-1, partial sequence, isolate: IRNB-274-1               | 25-Aug-16     | 4-Jan-18      | 1       |     | Shinella kummerowiae                        | RefSeq     | Shinella kummerowiae                        | 1405   | 0     |       | IRNB-274-1      | genomic DNA | activated sludge                                                                                                    |                  | 1         | 1405     | FALSE   | ncbi_filtered | 417745  |
| MF101048_1_1356                 | 417745  | MF101048        | Shinella kummerowiae strain SIG-2 16S ribosomal RNA gene, partial sequence                  | 19-Jun-17     | 4-Jan-18      | 1       |     | Shinella kummerowiae                        | RefSeq     | Shinella kummerowiae                        | 1356   | 0     |       | SIG-2           | genomic DNA |                                                                                                                     |                  | 1         | 1356     | FALSE   | ncbi_filtered | 417745  |
| NR_044066_1_1372                | 417745  | NR_044066       | Shinella kummerowiae strain CCB AU 25048 16S ribosomal RNA gene, partial sequence           | 3-Feb-15      | 4-Jan-18      | 1       |     | Shinella kummerowiae                        | RefSeq     | Shinella kummerowiae                        | 1372   | 1     |       | CCBAU 25048     | rRNA        |                                                                                                                     |                  | 1         | 1372     | TRUE    | ncbi_filtered | 417745  |
| KF374935_1_1409                 | 418240  | KF374935        | Blautia weclerae strain AUH-ILD56 16S ribosomal RNA gene, partial sequence                  | 17-Dec-13     | 4-Jan-18      | 1       |     | Blautia weclerae                            | RefSeq     | Blautia weclerae                            | 1409   | 0     |       | AUH-ILD56       | genomic DNA | feces                                                                                                               |                  | 1         | 1409     | FALSE   | ncbi_filtered | 418240  |
| KF374936_1_1410                 | 418240  | KF374936        | Blautia weclerae strain AUH-ILD17 16S ribosomal RNA gene, partial sequence                  | 30-Jun-17     | 4-Jan-18      | 1       |     | Blautia weclerae                            | RefSeq     | Blautia weclerae                            | 1410   | 0     |       | AUH-ILD17       | genomic DNA | feces                                                                                                               |                  | 1         | 1410     | FALSE   | ncbi_filtered | 418240  |
| NR_044054_1_1438                | 1121115 | NR_044054       | Blautia weclerae strain DSM 19850 16S ribosomal RNA gene, partial sequence                  | 3-Feb-15      | 4-Jan-18      | 1       |     | Blautia weclerae                            | RefSeq     | Blautia weclerae DSM 19850                  | 1438   | 1     |       | DSM 19850       | rRNA        |                                                                                                                     |                  | 1         | 1438     | TRUE    | ncbi_filtered | 418240  |
| NR_108183_1_1456                | 418699  | NR_108183       | Azoarcus olearius strain DQS-4 16S ribosomal RNA gene, partial sequence                     | 3-Feb-15      | 4-Jan-18      | 1       |     | Azoarcus olearius                           | RefSeq     | Azoarcus olearius                           | 1456   | 0     |       | DQS-4           | rRNA        |                                                                                                                     |                  | 1         | 1456     | TRUE    | ncbi_filtered | 418699  |
| NZ_CP016210_3592219_3593763     | 418699  | NZ_CP016210     | Azoarcus olearius strain DQS4, complete genome                                              | 17-Apr-17     | 4-Jan-18      | 1       |     | Azoarcus olearius                           | RefSeq     | Azoarcus olearius                           | 1545   | 0     |       | DQS4            | genomic DNA | oil-contaminated soil from Chinese Petroleum Corporation 77 Kaoshiung Refinery located in Kaoshiung 78 City, Taiwan |                  | 3592219   | 3593763  | TRUE    | ncbi_filtered | 418699  |
| NR_044129_1_1353                | 418707  | NR_044129       | Methylobacterium iners strain 53175-33 16S ribosomal RNA gene, partial sequence             | 3-Feb-15      | 4-Jan-18      | 1       |     | Methylobacterium iners                      | RefSeq     | Methylobacterium iners                      | 1353   | 0     |       | 53175-33        | rRNA        | air                                                                                                                 |                  | 1         | 1353     | TRUE    | ncbi_filtered | 418707  |
| AB698677_1_1447                 | 418708  | AB698677        | Methylobacterium aerolatum gene for 16S ribosomal RNA, partial sequence, strain: z18b       | 20-Jan-15     | 4-Jan-18      | 1       |     | Methylobacterium aerolatum                  | RefSeq     | Methylobacterium aerolatum                  | 1447   | 0     |       | z18b            | genomic DNA |                                                                                                                     |                  | 1         | 1447     | FALSE   | ncbi_filtered | 418708  |
| AB698711_1_1448                 | 418708  | AB698711        | Methylobacterium aerolatum gene for 16S ribosomal RNA, partial sequence, strain: 86a        | 20-Jan-15     | 4-Jan-18      | 1       |     | Methylobacterium aerolatum                  | RefSeq     | Methylobacterium aerolatum                  | 1448   | 0     |       | 86a             | genomic DNA |                                                                                                                     |                  | 1         | 1448     | FALSE   | ncbi_filtered | 418708  |
| AB896551_1_1405                 | 418708  | AB896551        | Methylobacterium aerolatum gene for 16S ribosomal RNA, partial sequence, strain: 92a-8      | 16-May-17     | 4-Jan-18      | 1       |     | Methylobacterium aerolatum                  | RefSeq     | Methylobacterium aerolatum                  | 1405   | 0     |       | 92a-8           | genomic DNA |                                                                                                                     |                  | 1         | 1405     | FALSE   | ncbi_filtered | 418708  |
| J0660275_1_1331                 | 418708  | J0660275        | Methylobacterium aerolatum strain 58-665 16S ribosomal RNA gene, partial sequence           | 23-Dec-15     | 4-Jan-18      | 1       |     | Methylobacterium aerolatum                  | RefSeq     | Methylobacterium aerolatum                  | 1331   | 0     |       | 58-665          | genomic DNA | plant tissue                                                                                                        |                  | 1         | 1331     | FALSE   | ncbi_filtered | 418708  |
| NR_044130_1_1332                | 418708  | NR_044130       | Methylobacterium aerolatum strain 54135-11 16S ribosomal RNA gene, partial sequence         | 3-Feb-15      | 4-Jan-18      | 1       |     | Methylobacterium aerolatum                  | RefSeq     | Methylobacterium aerolatum                  | 1332   | 1     |       | 54135-11        | rRNA        | air                                                                                                                 |                  | 1         | 1332     | TRUE    | ncbi_filtered | 418708  |
| NR_042587_1_1474                | 419005  | NR_042587       | Prevotella amnii strain CCUG 33648 16S ribosomal RNA gene, partial sequence                 | 3-Feb-15      | 4-Jan-18      | 1       |     | Prevotella amnii                            | RefSeq     | Prevotella amnii                            | 1474   | 3     |       | CCUG 33648      | rRNA        | host's amniotic fluid                                                                                               |                  | 1         | 1474     | TRUE    | ncbi_filtered | 419005  |
| NR_113093_1_1491                | 419005  | NR_113093       | Prevotella amnii strain JCM 14753 16S ribosomal RNA gene, partial sequence                  |               |               |         |     |                                             |            |                                             |        |       |       |                 |             |                                                                                                                     |                  |           |          |         |               |         |

| seqname                        | tax_id  | accession      | description                                                                           | modified_date | download_date | version | num_source | keywords                                    | organism                              | length | ambig_count | strain                           | mol_type    | isolate | isolation_source                                                | seq_start | seq_end | is_type | collection    | species |
|--------------------------------|---------|----------------|---------------------------------------------------------------------------------------|---------------|---------------|---------|------------|---------------------------------------------|---------------------------------------|--------|-------------|----------------------------------|-------------|---------|-----------------------------------------------------------------|-----------|---------|---------|---------------|---------|
| PPC01000007_82_1651            | 1298595 | PPC01000007    | Velloniella rogosae JCM 15642 Contig_7_len_100341, whole genome shotgun sequence      | 27-Feb-18     | 2-Mar-18      | 1       |            | WGS                                         | Velloniella rogosae JCM 15642         | 1570   | 0           | JCM 15642                        | genomic DNA |         |                                                                 | 82        | 1651    | TRUE    | ncbi_filtered | 423477  |
| NC_010644_1353187_1536694      | 445932  | NC_010644      | Elusimicrobium minutum Pe191, complete genome                                         | 17-Apr-17     | 4-Jan-18      | 1       |            | RefSeq                                      | Elusimicrobium minutum Pe191          | 1508   | 0           | 1535187                          | genomic DNA |         |                                                                 | 1353187   | 1536694 | TRUE    | ncbi_filtered | 423605  |
| FN1386757_1_1399               | 424800  | FN1386757      | Sphingomonas insulae partial 16S rRNA gene, strain Sco-D10                            | 15-Apr-11     | 4-Jan-18      | 1       |            |                                             | Sphingomonas insulae                  | 1399   | 0           | Sco-D10                          | genomic DNA |         | volcanic ash                                                    | 1         | 1399    | FALSE   | ncbi_filtered | 424800  |
| KX442617_1_1320                | 424800  | KX442617       | Sphingomonas insulae strain A1.22.1 16S ribosomal RNA gene, partial sequence          | 29-Jun-16     | 4-Jan-18      | 1       |            |                                             | Sphingomonas insulae                  | 1320   | 0           | A1.22.1                          | genomic DNA |         | natural mineral water                                           | 1         | 1320    | FALSE   | ncbi_filtered | 424800  |
| NR_044187_1_1447               | 424800  | NR_044187      | Sphingomonas insulae strain DS-28 16S ribosomal RNA gene, partial sequence            | 3-Feb-15      | 4-Jan-18      | 1       |            | RefSeq                                      | Sphingomonas insulae                  | 1447   | 0           | DS-28                            | rRNA        |         | soil                                                            | 1         | 1447    | TRUE    | ncbi_filtered | 424800  |
| EF405330_1_1379                | 425941  | EF405330       | Prevotella nanceiensis strain LBN 298 16S ribosomal RNA gene, partial sequence        | 4-Oct-07      | 4-Jan-18      | 1       |            |                                             | Prevotella nanceiensis                | 1379   | 0           | LBN 298                          | genomic DNA |         |                                                                 | 1         | 1379    | FALSE   | ncbi_filtered | 425941  |
| JN867228_1_1425                | 425941  | JN867228       | Prevotella nanceiensis strain SEQ059 16S ribosomal RNA gene, partial sequence         | 30-Mar-12     | 4-Jan-18      | 1       |            |                                             | Prevotella nanceiensis                | 1425   | 0           | SEQ059                           | genomic DNA |         | human clinical isolate                                          | 1         | 1425    | FALSE   | ncbi_filtered | 425941  |
| JN867286_1_1413                | 425941  | JN867286       | Prevotella nanceiensis strain SEQ211 16S ribosomal RNA gene, partial sequence         | 30-Mar-12     | 4-Jan-18      | 1       |            |                                             | Prevotella nanceiensis                | 1415   | 1           | SEQ211                           | genomic DNA |         | human clinical isolate                                          | 1         | 1415    | FALSE   | ncbi_filtered | 425941  |
| JN867313_1_1435                | 425941  | JN867313       | Prevotella nanceiensis strain SEQ240 16S ribosomal RNA gene, partial sequence         | 30-Mar-12     | 4-Jan-18      | 1       |            |                                             | Prevotella nanceiensis                | 1433   | 1           | SEQ240                           | genomic DNA |         | human clinical isolate                                          | 1         | 1433    | FALSE   | ncbi_filtered | 425941  |
| NR_043292_1_1394               | 425941  | NR_043292      | Prevotella nanceiensis strain AIP 261.03 16S ribosomal RNA gene, partial sequence     | 3-Feb-15      | 4-Jan-18      | 1       |            | RefSeq                                      | Prevotella nanceiensis                | 1394   | 0           | AIP 261.03                       | rRNA        |         |                                                                 | 1         | 1394    | TRUE    | ncbi_filtered | 425941  |
| EF436501_1_1408                | 428712  | EF436501       | Jonquetella anthropi 16S ribosomal RNA gene, partial sequence                         | 31-Mar-10     | 4-Jan-18      | 1       |            |                                             | Jonquetella anthropi                  | 1408   | 0           | ADV116                           | genomic DNA |         | human clinical sample                                           | 1         | 1408    | FALSE   | ncbi_filtered | 428712  |
| EF436503_1_1428                | 428712  | EF436503       | Jonquetella anthropi 16S ribosomal RNA gene, partial sequence                         | 31-Mar-10     | 4-Jan-18      | 1       |            |                                             | Jonquetella anthropi                  | 1352   | 0           | ADV808                           | genomic DNA |         | human clinical sample                                           | 1         | 1352    | FALSE   | ncbi_filtered | 428712  |
| GQ258963_1_1428                | 428712  | GQ258963       | Jonquetella anthropi strain ADV795 16S ribosomal RNA gene, partial sequence           | 31-Mar-10     | 4-Jan-18      | 1       |            |                                             | Jonquetella anthropi                  | 1428   | 0           | ADV795                           | genomic DNA |         | sacrum abscess                                                  | 1         | 1428    | FALSE   | ncbi_filtered | 428712  |
| GQ258964_1_1440                | 428712  | GQ258964       | Jonquetella anthropi strain ADV878 16S ribosomal RNA gene, partial sequence           | 31-Mar-10     | 4-Jan-18      | 1       |            |                                             | Jonquetella anthropi                  | 1440   | 0           | ADV878                           | genomic DNA |         | scrotum                                                         | 1         | 1440    | FALSE   | ncbi_filtered | 428712  |
| NZ_CM001376_93936_95473        | 885272  | NZ_CM001376    | Jonquetella anthropi DSM 22815 chromosome, whole genome shotgun sequence              | 7-Apr-17      | 4-Jan-18      | 1       |            | WGS;GSC.MIGS.2.1.NONCONTIGUOUS_FINAL;RefSeq | Jonquetella anthropi DSM 22815        | 1538   | 0           | DSM 22815                        | genomic DNA |         | cyst from 55 year-old patient                                   | 93936     | 95473   | TRUE    | ncbi_filtered | 428712  |
| KC934819_1_1362                | 428991  | KC934819       | Novosphingobium panipatense strain H32 16S ribosomal RNA gene, partial sequence       | 6-Jan-16      | 4-Jan-18      | 1       |            |                                             | Novosphingobium panipatense           | 1362   | 0           | H32                              | genomic DNA |         | purple siltstone                                                | 1         | 1362    | FALSE   | ncbi_filtered | 428991  |
| KF831411_1_1401                | 428991  | KF831411       | Novosphingobium panipatense strain 263ZG8 16S ribosomal RNA gene, partial sequence    | 1-Jan-14      | 4-Jan-18      | 1       |            |                                             | Novosphingobium panipatense           | 1401   | 0           | 263ZG8                           | genomic DNA |         | stem and root from alpine grasslands                            | 1         | 1401    | FALSE   | ncbi_filtered | 428991  |
| KT025847_1_1305                | 428991  | KT025847       | Novosphingobium panipatense strain UMTKB-4 16S ribosomal RNA gene, partial sequence   | 14-Nov-15     | 4-Jan-18      | 1       |            |                                             | Novosphingobium panipatense           | 1305   | 0           | UMTKB-4                          | genomic DNA |         | brackish water                                                  | 1         | 1305    | FALSE   | ncbi_filtered | 428991  |
| LN871837_1_1422                | 428991  | LN871837       | Novosphingobium panipatense partial 16S rRNA gene, isolate T10-D                      | 8-Sep-16      | 4-Jan-18      | 1       |            |                                             | Novosphingobium panipatense           | 1422   | 0           |                                  | genomic DNA | T10-D   | human patient                                                   | 1         | 1422    | FALSE   | ncbi_filtered | 428991  |
| MF554617_1_1356                | 428991  | MF554617       | Novosphingobium panipatense strain W131 16S ribosomal RNA gene, partial sequence      | 31-Jul-17     | 4-Jan-18      | 1       |            |                                             | Novosphingobium panipatense           | 1356   | 0           | W131                             | genomic DNA |         |                                                                 | 1         | 1356    | FALSE   | ncbi_filtered | 428991  |
| JQ659735_1_1444                | 428993  | JQ659735       | Pseudoxanthomonas indica strain RS-337 16S ribosomal RNA gene, partial sequence       | 23-Dec-15     | 4-Jan-18      | 1       |            |                                             | Pseudoxanthomonas indica              | 1444   | 0           | RS-337                           | genomic DNA |         | plant tissue                                                    | 1         | 1444    | FALSE   | ncbi_filtered | 428993  |
| KQ255013_1_1460                | 428993  | KQ255013       | Pseudoxanthomonas indica strain Sq16 16S ribosomal RNA gene, partial sequence         | 27-Jun-16     | 4-Jan-18      | 1       |            |                                             | Pseudoxanthomonas indica              | 1460   | 0           | Sq16                             | genomic DNA |         | Glyphosate contaminated field soil                              | 1         | 1460    | FALSE   | ncbi_filtered | 428993  |
| KX682025_1_1482                | 428993  | KX682025       | Pseudoxanthomonas indica strain YS-H9 16S ribosomal RNA gene, partial sequence        | 31-Oct-16     | 4-Jan-18      | 1       |            |                                             | Pseudoxanthomonas indica              | 1482   | 0           | YS-H9                            | genomic DNA |         | soil                                                            | 1         | 1482    | FALSE   | ncbi_filtered | 428993  |
| NR_116019_1_1392               | 428993  | NR_116019      | Pseudoxanthomonas indica strain P15 16S ribosomal RNA gene, partial sequence          | 3-Feb-15      | 4-Jan-18      | 1       |            | RefSeq                                      | Pseudoxanthomonas indica              | 1392   | 0           | P15                              | rRNA        |         | hexachlorocyclohexane dump site                                 | 1         | 1392    | TRUE    | ncbi_filtered | 428993  |
| NZ_FUZV0100001_1767648_1769192 | 428993  | NZ_FUZV0100001 | Pseudoxanthomonas indica strain P15, whole genome shotgun sequence                    | 18-Mar-17     | 4-Jan-18      | 1       |            | WGS;RefSeq                                  | Pseudoxanthomonas indica              | 1545   | 0           | P15                              | genomic DNA |         |                                                                 | 1767648   | 1769192 | TRUE    | ncbi_filtered | 428993  |
| NR_042372_1_1451               | 429134  | NR_042372      | Sphingomonas desiccabilis strain CP1D 16S ribosomal RNA gene, partial sequence        | 3-Feb-15      | 4-Jan-18      | 1       |            | RefSeq                                      | Sphingomonas desiccabilis             | 1451   | 0           | CP1D                             | rRNA        |         | biological soil crust                                           | 1         | 1451    | TRUE    | ncbi_filtered | 429134  |
| JX971555_1_1276                | 429727  | JX971555       | Devosia chinhatensis strain CH1-29 16S ribosomal RNA gene, partial sequence           | 15-Dec-12     | 4-Jan-18      | 1       |            |                                             | Devosia chinhatensis                  | 1276   | 0           | CH1-29                           | genomic DNA |         |                                                                 | 1         | 1276    | FALSE   | ncbi_filtered | 429727  |
| NZ_ZEYU1000061_605131_606622   | 429727  | NZ_ZEYU1000061 | Devosia chinhatensis strain IPL18 NODE_61, whole genome shotgun sequence              | 17-Apr-17     | 4-Jan-18      | 1       |            | WGS;RefSeq                                  | Devosia chinhatensis                  | 1492   | 0           | IPL18                            | genomic DNA |         | Hexachlorocyclohexane (HCH) dump site                           | 605131    | 606622  | TRUE    | ncbi_filtered | 429727  |
| AM498743_1_1364                | 430678  | AM498743       | Rhizobium cruense partial 16S rRNA gene, type strain KSW 4-12T                        | 9-Mar-09      | 4-Jan-18      | 1       |            |                                             | Rhizobium cruense                     | 1364   | 0           | type strain: KSW 4-12 = JBR02114 | genomic DNA |         |                                                                 | 1         | 1364    | FALSE   | ncbi_filtered | 430678  |
| AM501436_1_1390                | 431058  | AM501436       | Pelomonas aquatica partial 16S rRNA gene, strain CCG 52590                            | 3-Jul-09      | 4-Jan-18      | 1       |            |                                             | Pelomonas aquatica                    | 1390   | 0           | CCG 52590                        | genomic DNA |         | industrial water                                                | 1         | 1390    | FALSE   | ncbi_filtered | 431058  |
| JQ659664_1_1387                | 431058  | JQ659664       | Pelomonas aquatica strain R4-315 16S ribosomal RNA gene, partial sequence             | 23-Dec-15     | 4-Jan-18      | 1       |            |                                             | Pelomonas aquatica                    | 1387   | 0           | R4-315                           | genomic DNA |         | plant tissue                                                    | 1         | 1387    | FALSE   | ncbi_filtered | 431058  |
| KF381497_1_1390                | 431058  | KF381497       | Pelomonas aquatica strain 16-46 16S ribosomal RNA gene, partial sequence              | 26-Aug-13     | 4-Jan-18      | 1       |            |                                             | Pelomonas aquatica                    | 1390   | 0           | 16-46                            | genomic DNA |         | Taihu Lake sediment                                             | 1         | 1390    | FALSE   | ncbi_filtered | 431058  |
| JQ659646_1_1390                | 431059  | JQ659646       | Pelomonas puraqueae strain R3-118 16S ribosomal RNA gene, partial sequence            | 23-Dec-15     | 4-Jan-18      | 1       |            |                                             | Pelomonas puraqueae                   | 1390   | 0           | R3-118                           | genomic DNA |         | plant tissue                                                    | 1         | 1390    | FALSE   | ncbi_filtered | 431059  |
| KF817703_1_1409                | 431059  | KF817703       | Pelomonas puraqueae strain AT-91 16S ribosomal RNA gene, partial sequence             | 27-Jan-14     | 4-Jan-18      | 1       |            |                                             | Pelomonas puraqueae                   | 1409   | 0           | AT-91                            | genomic DNA |         |                                                                 | 1         | 1409    | FALSE   | ncbi_filtered | 431059  |
| KP196829_1_1385                | 431059  | KP196829       | Pelomonas puraqueae strain h18 16S ribosomal RNA gene, partial sequence               | 31-Mar-15     | 4-Jan-18      | 1       |            |                                             | Pelomonas puraqueae                   | 1385   | 0           | h18                              | genomic DNA |         | fresh water                                                     | 1         | 1385    | FALSE   | ncbi_filtered | 431059  |
| KY938171_1_1369                | 431059  | KY938171       | Pelomonas puraqueae strain E15 - 2 16S ribosomal RNA gene, partial sequence           | 24-Jul-17     | 4-Jan-18      | 1       |            |                                             | Pelomonas puraqueae                   | 1369   | 2           | E15 - 2                          | genomic DNA |         | captive host                                                    | 1         | 1369    | FALSE   | ncbi_filtered | 431059  |
| NZ_NSD1000035_1092_2623        | 431059  | NZ_NSD1000035  | Pelomonas puraqueae strain CCG 52769 Scaffold32_1, whole genome shotgun sequence      | 26-Jun-17     | 4-Jan-18      | 1       |            | WGS;RefSeq                                  | Pelomonas puraqueae                   | 1532   | 0           | CCG 52769                        | genomic DNA |         | Haemodialysis water                                             | 1092      | 2623    | TRUE    | ncbi_filtered | 431059  |
| NR_151894_1_1479               | 433293  | NR_151894      | Anaerotaenia torta strain FH052 16S ribosomal RNA, partial sequence                   | 15-Nov-17     | 4-Jan-18      | 1       |            | RefSeq                                      | Anaerotaenia torta                    | 1479   | 0           | FH052                            | rRNA        |         | anaerobic sludge of a methanogenic reactor of cattle farm waste | 1         | 1479    | TRUE    | ncbi_filtered | 433293  |
| LN890112_1_1629                | 433606  | LN890112       | Sphingomonas polyaromaticivorans partial 16S rRNA gene, strain M26                    | 18-Oct-15     | 4-Jan-18      | 1       |            |                                             | Sphingomonas polyaromaticivorans      | 1629   | 0           | M26                              | genomic DNA | M26     | rock surface                                                    | 1         | 1629    | FALSE   | ncbi_filtered | 433606  |
| LN890119_1_1614                | 433606  | LN890119       | Sphingomonas polyaromaticivorans partial 16S rRNA gene, strain M33                    | 18-Oct-15     | 4-Jan-18      | 1       |            |                                             | Sphingomonas polyaromaticivorans      | 1614   | 0           | M33                              | genomic DNA | M33     | rock surface                                                    | 1         | 1614    | FALSE   | ncbi_filtered | 433606  |
| NZ_H998592_378_1900            | 1203190 | NZ_H998592     | Corynebacterium timonense strain 5401744, whole genome shotgun sequence               | 8-Apr-17      | 4-Jan-18      | 1       |            | WGS;RefSeq                                  | Corynebacterium timonense 5401744     | 1523   | 0           | 5401744                          | genomic DNA |         |                                                                 | 378       | 1900    | TRUE    | ncbi_filtered | 441500  |
| NZ_L1629765_1538112_1539634    | 441500  | NZ_L1629765    | Corynebacterium timonense strain DSM 45434 genome assembly, chromosome: I             | 13-Apr-17     | 4-Jan-18      | 1       |            | RefSeq                                      | Corynebacterium timonense             | 1523   | 0           | DSM 45434                        | genomic DNA |         |                                                                 | 1538112   | 1539634 | TRUE    | ncbi_filtered | 441500  |
| NZ_L1629765_2393929_2395451    | 441500  | NZ_L1629765    | Corynebacterium timonense strain DSM 45434 genome assembly, chromosome: I             | 13-Apr-17     | 4-Jan-18      | 1       |            | RefSeq                                      | Corynebacterium timonense             | 1523   | 0           | DSM 45434                        | genomic DNA |         |                                                                 | 2393929   | 2395451 | TRUE    | ncbi_filtered | 441500  |
| NZ_ATVG0100023_2501_4032       | 1121364 | NZ_ATVG0100023 | Corynebacterium massiliense strain DSM 45435, whole genome shotgun sequence           | 17-Apr-17     | 4-Jan-18      | 1       |            | WGS;IMPROVED_HIGH_QUALITY_DRAFT;RefSeq      | Corynebacterium massiliense DSM 45435 | 1532   | 0           | DSM 45435                        | genomic DNA |         |                                                                 | 2501      | 4032    | TRUE    | ncbi_filtered | 441501  |
| KC854955_1_1429                | 443610  | KC854955       | UNVERIFIED: Devosia geojensis strain WY13 16S ribosomal RNA gene, partial sequence    | 26-Aug-13     | 4-Jan-18      | 1       |            | UNVERIFIED_ORGANISM                         | Devosia geojensis                     | 1429   | 0           | WY13                             | genomic DNA |         | ginger foundation soil                                          | 1         | 1429    | FALSE   | ncbi_filtered | 443610  |
| MF101175_1_1326                | 443610  | MF101175       | Devosia geojensis strain GMXG-2 16S ribosomal RNA gene, partial sequence              | 19-Jun-17     | 4-Jan-18      | 1       |            |                                             | Devosia geojensis                     | 1326   | 0           | GMXG-2                           | genomic DNA |         |                                                                 | 1         | 1326    | FALSE   | ncbi_filtered | 443610  |
| NR_044291_1_1449               | 443610  | NR_044291      | Devosia geojensis strain BD-C194 16S ribosomal RNA gene, partial sequence             | 3-Feb-15      | 4-Jan-18      | 1       |            | RefSeq                                      | Devosia geojensis                     | 1449   | 0           | BD-C194                          | rRNA        |         |                                                                 | 1         | 1449    | TRUE    | ncbi_filtered | 443610  |
| NZ_ZEJX0100084_3278_4767       | 443610  | NZ_ZEJX0100084 | Devosia geojensis strain BD-C194 NODE_87, whole genome shotgun sequence               | 17-Apr-17     | 4-Jan-18      | 1       |            | WGS;RefSeq                                  | Devosia geojensis                     | 1490   | 0           | BD-C194                          | genomic DNA |         |                                                                 | 3278      | 4767    | TRUE    | ncbi_filtered | 443610  |
| KY753246_1_1443                | 443615  | KY753246       | Pseudoxanthomonas sacheonensis strain YR-6 16S ribosomal RNA gene, partial sequence   | 19-Jun-17     | 4-Jan-18      | 1       |            |                                             | Pseudoxanthomonas sacheonensis        | 1443   | 0           | YR-6                             | genomic DNA |         | soil                                                            | 1         | 1443    | FALSE   | ncbi_filtered | 443615  |
| MF101054_1_1409                | 443615  | MF101054       | Pseudoxanthomonas sacheonensis strain SIG-9 16S ribosomal RNA gene, partial sequence  | 19-Jun-17     | 4-Jan-18      | 1       |            |                                             | Pseudoxanthomonas sacheonensis        | 1409   | 0           | SIG-9                            | genomic DNA |         |                                                                 | 1         | 1409    | FALSE   | ncbi_filtered | 443615  |
| NR_044293_1_1509               | 443615  | NR_044293      | Pseudoxanthomonas sacheonensis strain BD-C54 16S ribosomal RNA gene, partial sequence | 3-Feb-15      | 4-Jan-18      | 1       |            | RefSeq                                      | Pseudoxanthomonas sacheonensis        | 1509   | 0           | BD-C54                           | rRNA        |         |                                                                 | 1         | 1509    | TRUE    | ncbi_filtered | 443615  |
| AB829611_1_1443                | 446860  | AB829611       | Kocuria flava gene for 16S ribosomal RNA, partial sequence, strain: KT3               | 10-Jan-14     | 4-Jan-18      | 1       |            |                                             | Kocuria flava                         | 1443   | 0           | KT3                              | genomic DNA |         |                                                                 | 1         | 1443    | FALSE   | ncbi_filtered |         |



| seqname                   | tax_id  | accession       | description                                                                                           | modified_date | download_date | version | num_source | keywords                                             | organism                        | length | ambig_count | strain                   | mol_type        | isolate                                                              | isolation_source | seq_start | seq_stop | is_type | collection    | species |
|---------------------------|---------|-----------------|-------------------------------------------------------------------------------------------------------|---------------|---------------|---------|------------|------------------------------------------------------|---------------------------------|--------|-------------|--------------------------|-----------------|----------------------------------------------------------------------|------------------|-----------|----------|---------|---------------|---------|
| EUI12808_1_1442           | 451876  | EUI12808        | Rhizobium rhizoryae strain J3-N84 16S ribosomal RNA gene, partial sequence                            | 19-Nov-15     | 4-Jan-18      | 3       |            | Rhizobium rhizoryae                                  | Rhizobium rhizoryae             | 1442   | 0           | J3-N84                   | genomic DNA     | roots                                                                |                  | 1         | 1442     | FALSE   | ncbi_filtered | 451876  |
| JX122604_1_1358           | 453835  | JX122604        | Alishewanella aestuarii strain T12 16S ribosomal RNA gene, partial sequence                           | 30-Apr-15     | 4-Jan-18      | 1       |            | Alishewanella aestuarii                              | Alishewanella aestuarii         | 1358   | 1           | T12                      | genomic DNA     | tidal mud from Qinghai Lake                                          |                  | 1         | 1358     | FALSE   | ncbi_filtered | 453835  |
| NZ_ALAB0100033_582_2122   | 1197174 | NZ_ALAB0100033  | Alishewanella aestuarii B11 155.AEST.1_33, whole genome shotgun sequence                              | 17-Apr-17     | 4-Jan-18      | 1       |            | Alishewanella aestuarii B11                          | WGS;RefSeq                      | 1581   | 0           | B11                      | genomic DNA     | mid flat sediment                                                    |                  | 582       | 2122     | TRUE    | ncbi_filtered | 453835  |
| MF102142_1_1236           | 457454  | MF102142        | Deinococcus xinjiangensis strain SNU1 16S ribosomal RNA gene, partial sequence                        | 21-May-17     | 4-Jan-18      | 1       |            | Deinococcus xinjiangensis                            | Deinococcus xinjiangensis       | 1236   | 0           | SNU1                     | genomic DNA     | Ant                                                                  |                  | 1         | 1236     | FALSE   | ncbi_filtered | 457454  |
| NR_044542_1_1381          | 457454  | NR_044542       | Deinococcus xinjiangensis strain X-82 16S ribosomal RNA gene, partial sequence                        | 3-Feb-15      | 4-Jan-18      | 1       |            | Deinococcus xinjiangensis                            | RefSeq                          | 1381   | 0           | X-82                     | rRNA            |                                                                      |                  | 1         | 1381     | TRUE    | ncbi_filtered | 457454  |
| AM774588_1_1370           | 457922  | AM774588        | Naixibacter intermedius partial 16S rRNA gene, type strain CCUG 47800AT                               | 2-Aug-07      | 4-Jan-18      | 1       |            | Naixibacter intermedius                              | 16S ribosomal RNA;16S rRNA gene | 1370   | 0           | type strain: CCUG 47800A | genomic DNA     |                                                                      |                  | 1         | 1370     | FALSE   | ncbi_filtered | 457922  |
| 457923_1_1452             | 457923  | EU554441        | Naixibacter intermedius partial 16S rRNA gene, partial sequence                                       | 23-Apr-08     | 4-Jan-18      | 1       |            | Naixibacter intermedius                              |                                 | 1452   | 0           | Ag15                     | genomic DNA     | larval gut                                                           |                  | 1         | 1452     | FALSE   | ncbi_filtered | 457923  |
| FJ380959_1_1410           | 457923  | FJ380959        | Naixibacter haematophilus strain BQ/N18-05d 16S ribosomal RNA gene, partial sequence                  | 13-Jan-09     | 4-Jan-18      | 1       |            | Naixibacter haematophilus                            |                                 | 1410   | 6           | BQ/N18-05d               | genomic DNA     | first instar nymph                                                   |                  | 1         | 1410     | FALSE   | ncbi_filtered | 457923  |
| KT025845_1_1356           | 457923  | KT025845        | Massilia haematophila strain UMTKB-2 16S ribosomal RNA gene, partial sequence                         | 14-Nov-15     | 4-Jan-18      | 1       |            | Massilia haematophila                                |                                 | 1356   | 0           | UMTKB-2                  | genomic DNA     | brackish water                                                       |                  | 1         | 1356     | FALSE   | ncbi_filtered | 457923  |
| LN774628_1_1353           | 457923  | LN774628        | Massilia haematophila partial 16S rRNA gene, isolate 1111MAR91                                        | 27-Feb-15     | 4-Jan-18      | 1       |            | Massilia haematophila                                |                                 | 1353   | 0           | genomic DNA              | 1111MAR91       | air sample                                                           |                  | 1         | 1353     | FALSE   | ncbi_filtered | 457923  |
| NR_042653_1_1433          | 457923  | NR_042653       | Massilia haematophila strain CCUG 38318 16S ribosomal RNA gene, partial sequence                      | 3-Feb-15      | 4-Jan-18      | 1       |            | Massilia haematophila                                | RefSeq                          | 1433   | 4           | CCUG 38318               | rRNA            |                                                                      |                  | 1         | 1433     | TRUE    | ncbi_filtered | 457923  |
| KT261095_1_1213           | 458197  | KT261095        | Serratia nematodiphila strain RC883 16S ribosomal RNA gene, partial sequence                          | 19-Sep-15     | 4-Jan-18      | 1       |            | Serratia nematodiphila                               |                                 | 1213   | 4           | RC883                    | genomic DNA     | bat guano                                                            |                  | 1         | 1213     | FALSE   | ncbi_filtered | 458197  |
| KT261097_1_1427           | 458197  | KT261097        | Serratia nematodiphila strain RC885 16S ribosomal RNA gene, partial sequence                          | 19-Sep-15     | 4-Jan-18      | 1       |            | Serratia nematodiphila                               |                                 | 1427   | 0           | RC885                    | genomic DNA     | bat guano                                                            |                  | 1         | 1427     | FALSE   | ncbi_filtered | 458197  |
| KY887776_1_1449           | 458197  | KY887776        | Serratia nematodiphila strain YS8 16S ribosomal RNA gene, partial sequence                            | 12-Apr-17     | 4-Jan-18      | 1       |            | Serratia nematodiphila                               |                                 | 1449   | 0           | YS8                      | genomic DNA     |                                                                      |                  | 1         | 1449     | FALSE   | ncbi_filtered | 458197  |
| MF417388_1_1512           | 458197  | MF417388        | Serratia nematodiphila strain RL-2 16S ribosomal RNA gene, partial sequence                           | 7-Jul-17      | 4-Jan-18      | 1       |            | Serratia nematodiphila                               |                                 | 1512   | 0           | RL-2                     | genomic DNA     |                                                                      |                  | 1         | 1512     | FALSE   | ncbi_filtered | 458197  |
| MG786412_1_1420           | 458197  | MG786412        | Serratia nematodiphila strain ICMF 20894 16S ribosomal RNA gene, partial sequence                     | 17-Jan-18     | 22-Jan-18     | 1       |            | Serratia nematodiphila                               |                                 | 1420   | 1           | ICMF 20894               | genomic DNA     | soil                                                                 |                  | 1         | 1420     | FALSE   | ncbi_filtered | 458197  |
| EU373423_1_1494           | 459529  | EU373423        | Sphingobacterium silyangense strain YRL14 16S ribosomal RNA gene, partial sequence                    | 2-Apr-08      | 4-Jan-18      | 1       |            | Sphingobacterium silyangense                         |                                 | 1494   | 0           | YRL14                    | genomic DNA     | leaf                                                                 |                  | 1         | 1494     | FALSE   | ncbi_filtered | 459529  |
| KU323612_1_1489           | 459529  | KU323612        | Sphingobacterium silyangense strain S66 16S ribosomal RNA gene, partial sequence                      | 31-Dec-17     | 4-Jan-18      | 1       |            | Sphingobacterium silyangense                         |                                 | 1489   | 0           | S66                      | genomic DNA     | rhizosphere soil of Panax ginseng                                    |                  | 1         | 1489     | FALSE   | ncbi_filtered | 459529  |
| LN995679_1_1461           | 459529  | LN995679        | Sphingobacterium silyangense partial 16S rRNA gene, strain R-50669                                    | 7-Dec-16      | 4-Jan-18      | 1       |            | Sphingobacterium silyangense                         |                                 | 1416   | 5           | R-50669                  | genomic DNA     |                                                                      |                  | 1         | 1416     | FALSE   | ncbi_filtered | 459529  |
| MG827299_1_1364           | 459529  | MG827299        | Sphingobacterium silyangense strain C18 16S ribosomal RNA gene, partial sequence                      | 29-Jan-18     | 14-Feb-18     | 1       |            | Sphingobacterium silyangense                         |                                 | 1364   | 0           | C18                      | genomic DNA     | soil                                                                 |                  | 1         | 1364     | FALSE   | ncbi_filtered | 459529  |
| NR_044391_1_1439          | 459529  | NR_044391       | Sphingobacterium silyangense strain SY1 16S ribosomal RNA gene, partial sequence                      | 3-Feb-15      | 4-Jan-18      | 1       |            | Sphingobacterium silyangense                         | RefSeq                          | 1489   | 0           | SY1                      | rRNA            |                                                                      |                  | 1         | 1489     | TRUE    | ncbi_filtered | 459529  |
| EF558366_1_1489           | 461392  | EF558366        | Brooklawia massiliensis strain 5402732 16S ribosomal RNA gene, partial sequence                       | 1-May-08      | 4-Jan-18      | 1       |            | Brooklawia massiliensis                              |                                 | 1439   | 0           | 5402732                  | genomic DNA     |                                                                      |                  | 1         | 1439     | FALSE   | ncbi_filtered | 461392  |
| NR_113059_1_1520          | 1167628 | NR_113059       | Actinomyces massiliensis strain 4401292 16S ribosomal RNA gene, partial sequence                      | 3-Feb-15      | 4-Jan-18      | 1       |            | Actinomyces massiliensis 4401292                     | RefSeq                          | 1520   | 0           | 4401292                  | rRNA            |                                                                      |                  | 1         | 1520     | TRUE    | ncbi_filtered | 461393  |
| NZ_AKFT0100126_281_1847   | 1125718 | NZ_AKFT0100126  | Actinomyces massiliensis F0489 contig000179, whole genome shotgun sequence                            | 23-Nov-17     | 4-Jan-18      | 1       |            | Actinomyces massiliensis F0489                       | WGS;HIGH_QUALITY_DRAFT;RefSeq   | 1567   | 0           | F0489                    | genomic DNA     |                                                                      |                  | 281       | 1847     | FALSE   | ncbi_filtered | 461393  |
| NZ_AKIO0100026_266_1833   | 1167628 | NZ_AKIO0100026  | Actinomyces massiliensis strain 4401292 contig00026, whole genome shotgun sequence                    | 7-Apr-17      | 4-Jan-18      | 1       |            | Actinomyces massiliensis 4401292                     | WGS;RefSeq                      | 1568   | 0           | 4401292                  | genomic DNA     | biological product [ENV-D:02000043]                                  |                  | 266       | 1833     | TRUE    | ncbi_filtered | 461393  |
| NC_020520_2931417_2312944 | 1131172 | NC_020520       | Ilumatobacter coccineus YM16-304 DNA, complete genome                                                 | 17-Apr-17     | 4-Jan-18      | 1       |            | Ilumatobacter coccineus YM16-304                     | RefSeq                          | 1528   | 0           | YM16-304                 | genomic DNA     | patient blood culture                                                |                  | 231147    | 231294   | TRUE    | ncbi_filtered | 467094  |
| NC_020520_293099_2932226  | 1131172 | NC_020520       | Ilumatobacter coccineus YM16-304 DNA, complete genome                                                 | 17-Apr-17     | 4-Jan-18      | 1       |            | Ilumatobacter coccineus YM16-304                     | RefSeq                          | 1528   | 0           | YM16-304                 | genomic DNA     |                                                                      |                  | 293099    | 2932226  | TRUE    | ncbi_filtered | 467094  |
| PD5L0100066_1_1228        | 467094  | PD5L0100066     | Ilumatobacter coccineus isolate DOLJRAL78_61_10 DolJCrA78_scaff04_4372, whole genome shotgun sequence | 3-Nov-17      | 4-Jan-18      | 1       |            | Ilumatobacter coccineus (oral metagenome)            | WGS                             | 1228   | 0           | genomic DNA              | DOLJRAL78_61_10 | swab sample of gingival sulcus (mouth) from 5 year old male Doghu, J |                  | 1         | 1228     | FALSE   | ncbi_filtered | 467094  |
| AEPW01000130_1_1334       | 887325  | AEPW01000130    | Lachnoaerobaculum saburruum DSM 3986 contig00130, whole genome shotgun sequence                       | 27-Dec-10     | 4-Jan-18      | 1       |            | Lachnoaerobaculum saburruum DSM 3986                 | WGS;STANDARD_DRAFT              | 1334   | 0           | DSM 3986                 | genomic DNA     | oral cavity                                                          |                  | 1         | 1334     | TRUE    | ncbi_filtered | 467210  |
| KJ082046_1_1371           | 467210  | KJ082046        | Lachnoaerobaculum saburruum strain DNF00896 16S ribosomal RNA gene, partial sequence                  | 26-Mar-14     | 4-Jan-18      | 1       |            | Lachnoaerobaculum saburruum                          |                                 | 1371   | 4           | DNF00896                 | genomic DNA     | vaginal fluid                                                        |                  | 1         | 1371     | FALSE   | ncbi_filtered | 467210  |
| NR_104684_1_1493          | 887325  | NR_104684       | Lachnoaerobaculum saburruum strain JCM 11021 16S ribosomal RNA gene, partial sequence                 | 3-Feb-15      | 4-Jan-18      | 1       |            | Lachnoaerobaculum saburruum DSM 3986                 | RefSeq                          | 1493   | 2           | JCM 11021                | rRNA            |                                                                      |                  | 1         | 1493     | TRUE    | ncbi_filtered | 467210  |
| JF683676_1_1297           | 470150  | JF683676        | Pseudomonas taiwanensis strain E46 16S ribosomal RNA gene, partial sequence                           | 15-Mar-12     | 4-Jan-18      | 1       |            | Pseudomonas taiwanensis                              |                                 | 1297   | 0           | E46                      | genomic DNA     |                                                                      |                  | 1         | 1297     | FALSE   | ncbi_filtered | 470150  |
| JP911380_1_1378           | 470150  | JP911380        | Pseudomonas taiwanensis strain EPA38 16S ribosomal RNA gene, partial sequence                         | 6-Oct-11      | 4-Jan-18      | 1       |            | Pseudomonas taiwanensis                              |                                 | 1378   | 4           | EPA38                    | genomic DNA     |                                                                      |                  | 1         | 1378     | FALSE   | ncbi_filtered | 470150  |
| KM817286_1_1506           | 470150  | KM817286        | Pseudomonas taiwanensis strain IH B 14565 16S ribosomal RNA gene, partial sequence                    | 1-Dec-14      | 4-Jan-18      | 1       |            | Pseudomonas taiwanensis                              |                                 | 1506   | 0           | IH B 14565               | genomic DNA     | CSIR IIBT sabbot farm Chandour, District Kangra, Himachal Pradesh    |                  | 1         | 1506     | FALSE   | ncbi_filtered | 470150  |
| KU597539_1_1470           | 470150  | KU597539        | Pseudomonas taiwanensis strain RD_DARAB_16 16S ribosomal RNA gene, partial sequence                   | 8-Dec-16      | 4-Jan-18      | 1       |            | Pseudomonas taiwanensis                              |                                 | 1473   | 0           | RD_DARAB_16              | genomic DNA     | soil                                                                 |                  | 1         | 1473     | FALSE   | ncbi_filtered | 470150  |
| MF957294_1_1281           | 470150  | MF957294        | Pseudomonas taiwanensis strain 3-58 16S ribosomal RNA gene, partial sequence                          | 19-Sep-17     | 4-Jan-18      | 1       |            | Pseudomonas taiwanensis                              |                                 | 1281   | 0           | Mar-58                   | genomic DNA     |                                                                      |                  | 1         | 1281     | FALSE   | ncbi_filtered | 470150  |
| JX040437_1_1353           | 470446  | JX040437        | Sphingobacterium kitahiroshimense strain DMB-1 16S ribosomal RNA gene, partial sequence               | 10-Jul-12     | 4-Jan-18      | 1       |            | Sphingobacterium kitahiroshimense                    |                                 | 1353   | 0           | DMB-1                    | genomic DNA     | Dam Cave                                                             |                  | 1         | 1353     | FALSE   | ncbi_filtered | 470446  |
| KC618436_1_1383           | 470446  | KC618436        | Sphingobacterium kitahiroshimense 16S ribosomal RNA gene, partial sequence                            | 31-Dec-13     | 4-Jan-18      | 1       |            | Sphingobacterium kitahiroshimense                    |                                 | 1383   | 0           | D                        | genomic DNA     |                                                                      |                  | 1         | 1383     | FALSE   | ncbi_filtered | 470446  |
| KC854812_1_1462           | 470446  | KC854812        | UNVERIFIED: Sphingobacterium kitahiroshimense strain LF10 16S ribosomal RNA gene, partial sequence    | 26-Aug-13     | 4-Jan-18      | 1       |            | Sphingobacterium kitahiroshimense                    | UNVERIFIED_ORGANISM             | 1462   | 0           | LF10                     | genomic DNA     | ginger foundation soil                                               |                  | 1         | 1462     | FALSE   | ncbi_filtered | 470446  |
| MG027863_1_1420           | 470446  | MG027863        | Sphingobacterium kitahiroshimense strain LT-2 16S ribosomal RNA gene, partial sequence                | 10-Oct-17     | 4-Jan-18      | 1       |            | Sphingobacterium kitahiroshimense                    |                                 | 1402   | 0           | LT-2                     | genomic DNA     | Dhundi Glacier, Himachal Pradesh                                     |                  | 1         | 1402     | FALSE   | ncbi_filtered | 470446  |
| NR_041636_1_1490          | 470446  | NR_041636       | Sphingobacterium kitahiroshimense strain 10C 16S ribosomal RNA gene, partial sequence                 | 3-Feb-15      | 4-Jan-18      | 1       |            | Sphingobacterium kitahiroshimense                    | RefSeq                          | 1490   | 8           | 10C                      | rRNA            |                                                                      |                  | 1         | 1490     | TRUE    | ncbi_filtered | 470446  |
| EU130901_1_1453           | 470565  | EU130901        | Prevotella histicola strain N19-30 16S ribosomal RNA gene, partial sequence                           | 9-Sep-08      | 4-Jan-18      | 1       |            | Prevotella histicola                                 |                                 | 1453   | 4           | N19-30                   | genomic DNA     |                                                                      |                  | 1         | 1453     | FALSE   | ncbi_filtered | 470565  |
| JN867241_1_1317           | 470565  | JN867241        | Prevotella histicola strain SEQ075 16S ribosomal RNA gene, partial sequence                           | 30-Mar-12     | 4-Jan-18      | 1       |            | Prevotella histicola                                 |                                 | 1317   | 2           | SEQ075                   | genomic DNA     | human clinical isolate                                               |                  | 1         | 1317     | FALSE   | ncbi_filtered | 470565  |
| JN867304_1_1429           | 470565  | JN867304        | Prevotella histicola strain SEQ231 16S ribosomal RNA gene, partial sequence                           | 30-Mar-12     | 4-Jan-18      | 1       |            | Prevotella histicola                                 |                                 | 1429   | 2           | SEQ231                   | genomic DNA     | human clinical isolate                                               |                  | 1         | 1429     | FALSE   | ncbi_filtered | 470565  |
| JN867315_1_1430           | 470565  | JN867315        | Prevotella histicola strain SEQ242 16S ribosomal RNA gene, partial sequence                           | 30-Mar-12     | 4-Jan-18      | 1       |            | Prevotella histicola                                 |                                 | 1430   | 2           | SEQ242                   | genomic DNA     | human clinical isolate                                               |                  | 1         | 1430     | FALSE   | ncbi_filtered | 470565  |
| NZ_BAIX0100046_129_1665   | 1326504 | NZ_BAIX0100046  | Prevotella histicola JCM 15637 = DNF00424 strain JCM 15637, whole genome shotgun sequence             | 9-Apr-17      | 4-Jan-18      | 1       |            | Prevotella histicola JCM 15637 = DNF00424            | WGS;RefSeq;STANDARD_DRAFT       | 1537   | 0           | JCM 15637                | genomic DNA     |                                                                      |                  | 129       | 1665     | TRUE    | ncbi_filtered | 470565  |
| AB546342_1_1293           | 470868  | AB546342        | Achromobacter marplatensis gene for 16S rRNA, partial sequence, strain: SSK-1                         | 4-Dec-10      | 4-Jan-18      | 1       |            | Achromobacter marplatensis                           |                                 | 1293   | 0           | SSK-1                    | genomic DNA     | activated sludge                                                     |                  | 1         | 1293     | FALSE   | ncbi_filtered | 470868  |
| KC790296_1_1430           | 470868  | KC790296        | Achromobacter marplatensis strain RY27 16S ribosomal RNA gene, partial sequence                       | 7-Dec-15      | 4-Jan-18      | 1       |            | Achromobacter marplatensis                           |                                 | 1430   | 0           | RY27                     | genomic DNA     | root                                                                 |                  | 1         | 1430     | FALSE   | ncbi_filtered | 470868  |
| KR876913_1_1435           | 470868  | KR876913        | Achromobacter marplatensis strain JM-R37 16S ribosomal RNA gene, partial sequence                     | 12-Feb-14     | 4-Jan-18      | 1       |            | Achromobacter marplatensis (Achromobacter spirillum) |                                 | 1435   | 0           | JM-R37                   | genomic DNA     |                                                                      |                  | 1         | 1435     | FALSE   | ncbi_filtered | 470868  |
| MF773936_1_1418           | 470868  | MF773936        | Achromobacter marplatensis strain XYG2 16S ribosomal RNA gene, partial sequence                       | 3-Sep-17      | 4-Jan-18      | 1       |            | Achromobacter marplatensis (Achromobacter spirillum) |                                 | 1418   | 0           | XYG2                     | genomic DNA     | Cave spleoethem                                                      |                  | 1         | 1418     | FALSE   | ncbi_filtered | 470868  |
| NZ_NUIG01000044_245_1690  | 470868  | NZ_NUIG01000044 | Achromobacter marplatensis strain B2 Scaffold43_1, whole genome shotgun sequence                      | 29-Jun-17     | 4-Jan-18      | 1       |            | Achromobacter marplatensis (Achromobacter spirillum) | WGS;RefSeq                      | 1466   | 0           | B2                       | genomic DNA     | Pentachlorophenol-contaminated soil                                  |                  | 245       | 1690     | TRUE    | ncbi_filtered | 470868  |
| KY451836_1_1504           | 470932  | KY451836        | Pantoea deleyi strain 10DM4-1 16S ribosomal RNA                                                       |               |               |         |            |                                                      |                                 |        |             |                          |                 |                                                                      |                  |           |          |         |               |         |

| seqname                   | tax_id  | accession       | description                                                                                           | modified_date | download_date | version | num | source                                             | keywords                               | organism                                           | length | ambig_count | strain          | mol_type    | isolate                                                        | isolation_source | seq_start | seq_stop | is_type | collection    | species |
|---------------------------|---------|-----------------|-------------------------------------------------------------------------------------------------------|---------------|---------------|---------|-----|----------------------------------------------------|----------------------------------------|----------------------------------------------------|--------|-------------|-----------------|-------------|----------------------------------------------------------------|------------------|-----------|----------|---------|---------------|---------|
| KC139426_1_1405           | 472693  | KC139426        | Pantoea eucrina strain h-6 16S ribosomal RNA gene, partial sequence                                   | 5-Feb-13      | 4-Jan-18      | 1       |     | Pantoea eucrina                                    |                                        | Pantoea eucrina                                    | 1405   | 0           | h-6             | genomic DNA |                                                                |                  | 1         | 1405     | FALSE   | ncbi_filtered | 472693  |
| KC759399_1_1454           | 472693  | KC759399        | Pantoea eucrina strain CT194 16S ribosomal RNA gene, partial sequence                                 | 23-Jun-13     | 4-Jan-18      | 1       |     | Pantoea eucrina                                    |                                        | Pantoea eucrina                                    | 1454   | 0           | CT194           | genomic DNA |                                                                |                  | 1         | 1454     | FALSE   | ncbi_filtered | 472693  |
| NZ_MIPPO1000087_39_1592   | 472693  | NZ_MIPPO1000087 | Pantoea eucrina strain LMG 5346 LMG_5346_Contig0087, whole genome shotgun sequence                    | 4-Aug-17      | 4-Jan-18      | 1       |     | Pantoea eucrina                                    | WGS,RefSeq                             | Pantoea eucrina                                    | 1554   | 0           | LMG 5346        | genomic DNA |                                                                |                  | 39        | 1592     | TRUE    | ncbi_filtered | 472693  |
| JX113245_1_1424           | 472694  | JX113245        | Pantoea brenerri strain +y31 16S ribosomal RNA gene, partial sequence                                 | 31-Jul-12     | 4-Jan-18      | 1       |     | Pantoea brenerri                                   |                                        | Pantoea brenerri                                   | 1424   | 0           | o               | genomic DNA | fresh tobacco leaf                                             |                  | 1         | 1424     | FALSE   | ncbi_filtered | 472694  |
| KP279966_1_1428           | 472694  | KP279966        | Pantoea brenerri strain NL1 16S ribosomal RNA gene, partial sequence                                  | 26-Apr-15     | 4-Jan-18      | 1       |     | Pantoea brenerri                                   |                                        | Pantoea brenerri                                   | 1428   | 0           | NL1             | genomic DNA |                                                                |                  | 1         | 1368     | FALSE   | ncbi_filtered | 472694  |
| KU921568_1_1485           | 472694  | KU921568        | Pantoea brenerri strain HBB 9376 16S ribosomal RNA gene, partial sequence                             | 22-Oct-16     | 4-Jan-18      | 1       |     | Pantoea brenerri                                   |                                        | Pantoea brenerri                                   | 1485   | 0           | IHBB 9376       | genomic DNA | Chandira Tal Lake Sediment, Lahaul and Spiti, Himachal Pradesh |                  | 1         | 1485     | FALSE   | ncbi_filtered | 472694  |
| KX58583_1_1437            | 472694  | KX58583         | Pantoea brenerri strain ICE228 16S ribosomal RNA gene, partial sequence                               | 14-Dec-16     | 4-Jan-18      | 1       |     | Pantoea brenerri                                   |                                        | Pantoea brenerri                                   | 1437   | 0           | ICE228          | genomic DNA | ice cube                                                       |                  | 1         | 1437     | FALSE   | ncbi_filtered | 472694  |
| NZ_MIEI01000169_165_1714  | 472694  | NZ_MIEI01000169 | Pantoea brenerri strain LMG 5343 LMG_5343_Contig0169, whole genome shotgun sequence                   | 4-Aug-17      | 4-Jan-18      | 1       |     | Pantoea brenerri                                   | WGS,RefSeq                             | Pantoea brenerri                                   | 1550   | 0           | LMG 5343        | genomic DNA |                                                                |                  | 165       | 1714     | TRUE    | ncbi_filtered | 472694  |
| HM854252_1_1450           | 472695  | HM854252        | Pantoea septica strain KTH-64 16S ribosomal RNA gene, partial sequence                                | 8-Sep-10      | 4-Jan-18      | 1       |     | Pantoea septica                                    |                                        | Pantoea septica                                    | 1450   | 0           | KTH-64          | genomic DNA | deposit liquid of Populus stem                                 |                  | 1         | 1450     | FALSE   | ncbi_filtered | 472695  |
| KJ534278_1_1470           | 472695  | KJ534278        | Pantoea septica strain O0Y5-10 16S ribosomal RNA gene, partial sequence                               | 14-May-14     | 4-Jan-18      | 1       |     | Pantoea septica                                    |                                        | Pantoea septica                                    | 1470   | 0           | O0Y5-10         | genomic DNA | olive oil                                                      |                  | 1         | 1470     | FALSE   | ncbi_filtered | 472695  |
| KJ574410_1_1248           | 472695  | KJ574410        | Pantoea septica strain BF15-3 16S ribosomal RNA gene, partial sequence                                | 21-May-14     | 4-Jan-18      | 1       |     | Pantoea septica                                    |                                        | Pantoea septica                                    | 1248   | 0           | BF15-3          | genomic DNA |                                                                |                  | 1         | 1248     | FALSE   | ncbi_filtered | 472695  |
| NR_116752_1_1362          | 472695  | NR_116752       | Pantoea septica strain LMG 5345 16S ribosomal RNA gene, partial sequence                              | 3-Feb-15      | 4-Jan-18      | 1       |     | Pantoea septica                                    | RefSeq                                 | Pantoea septica                                    | 1362   | 4           | LMG 5345        | rRNA        |                                                                |                  | 1         | 1362     | TRUE    | ncbi_filtered | 472695  |
| NZ_MLIJ01000077_40_1591   | 472695  | NZ_MLIJ01000077 | Pantoea septica strain LMG 5345 Contig0077, whole genome shotgun sequence                             | 21-Apr-17     | 4-Jan-18      | 1       |     | Pantoea septica                                    | WGS,RefSeq                             | Pantoea septica                                    | 1552   | 0           | LMG 5345        | genomic DNA |                                                                |                  | 40        | 1591     | TRUE    | ncbi_filtered | 472695  |
| EU086808_1_1449           | 479117  | EU086808        | Brevibacterium ravenspurgense strain 744 16S ribosomal RNA gene, partial sequence                     | 4-Nov-13      | 4-Jan-18      | 1       |     | Brevibacterium ravenspurgense                      |                                        | Brevibacterium ravenspurgense                      | 1449   | 0           | 744             | genomic DNA |                                                                |                  | 1         | 1449     | FALSE   | ncbi_filtered | 479117  |
| NR_044398_1_1470          | 479117  | NR_044398       | Brevibacterium ravenspurgense strain 20 16S ribosomal RNA gene, partial sequence                      | 3-Feb-15      | 4-Jan-18      | 1       |     | Brevibacterium ravenspurgense                      | RefSeq                                 | Brevibacterium ravenspurgense                      | 1470   | 3           | 20              | rRNA        |                                                                |                  | 1         | 1470     | TRUE    | ncbi_filtered | 479117  |
| NZ_CAI00100026_275_1805   | 1176165 | NZ_CAI00100026  | Brevibacterium ravenspurgense 5401308 = CCUG 53855 strain 5401308, whole genome shotgun sequence      | 7-Apr-17      | 4-Jan-18      | 1       |     | Brevibacterium ravenspurgense 5401308 = CCUG 53855 | WGS,RefSeq                             | Brevibacterium ravenspurgense 5401308 = CCUG 53855 | 1531   | 0           | 5401308         | genomic DNA |                                                                |                  | 275       | 1805     | FALSE   | ncbi_filtered | 479117  |
| NZ_LPKW01000221_8_1448    | 479117  | NZ_LPKW01000221 | Brevibacterium ravenspurgense strain NML 140868 Braven2, contig000221, whole genome shotgun sequence  | 12-Apr-17     | 4-Jan-18      | 1       |     | Brevibacterium ravenspurgense                      | WGS,RefSeq                             | Brevibacterium ravenspurgense                      | 1441   | 0           | NML 140868      | genomic DNA | urine                                                          |                  | 8         | 1448     | FALSE   | ncbi_filtered | 479117  |
| NZ_LQO01000008_3655_5186  | 479117  | NZ_LQO01000008  | Brevibacterium ravenspurgense strain CCUG56047 Braven1, contig000008, whole genome shotgun sequence   | 12-Apr-17     | 4-Jan-18      | 1       |     | Brevibacterium ravenspurgense                      | WGS,RefSeq                             | Brevibacterium ravenspurgense                      | 1532   | 0           | CCUG56047       | genomic DNA | wound                                                          |                  | 3655      | 5186     | TRUE    | ncbi_filtered | 479117  |
| KJ183068_1_1496           | 487316  | KJ183068        | Acinetobacter soli strain BM-46 16S ribosomal RNA gene, partial sequence                              | 2-Mar-14      | 4-Jan-18      | 1       |     | Acinetobacter soli                                 |                                        | Acinetobacter soli                                 | 1496   | 0           | BM-46           | genomic DNA | rhizosphere of basmati rice                                    |                  | 1         | 1496     | FALSE   | ncbi_filtered | 487316  |
| KJ806324_1_1340           | 487316  | KJ806324        | Acinetobacter soli strain T-B10C 16S ribosomal RNA gene, partial sequence                             | 28-May-14     | 4-Jan-18      | 1       |     | Acinetobacter soli                                 |                                        | Acinetobacter soli                                 | 1340   | 0           | T-B10C          | genomic DNA |                                                                |                  | 1         | 1340     | FALSE   | ncbi_filtered | 487316  |
| KJ806407_1_1340           | 487316  | KJ806407        | Acinetobacter soli strain 5-B10B 16S ribosomal RNA gene, partial sequence                             | 28-May-14     | 4-Jan-18      | 1       |     | Acinetobacter soli                                 |                                        | Acinetobacter soli                                 | 1340   | 0           | 5-B10B          | genomic DNA |                                                                |                  | 1         | 1340     | FALSE   | ncbi_filtered | 487316  |
| KJ806443_1_1284           | 487316  | KJ806443        | Acinetobacter soli strain T-X5D 16S ribosomal RNA gene, partial sequence                              | 28-May-14     | 4-Jan-18      | 1       |     | Acinetobacter soli                                 |                                        | Acinetobacter soli                                 | 1284   | 0           | T-X5D           | genomic DNA |                                                                |                  | 1         | 1284     | FALSE   | ncbi_filtered | 487316  |
| NZ_BBNM01000027_132_1677  | 487316  | NZ_BBNM01000027 | Acinetobacter soli strain KCTC 22184, whole genome shotgun sequence                                   | 6-Apr-17      | 4-Jan-18      | 1       |     | Acinetobacter soli                                 | WGS,HIGH_QUALITY_DRAFT,RefSeq          | Acinetobacter soli                                 | 1546   | 0           | KCTC 22184      | genomic DNA |                                                                |                  | 132       | 1677     | TRUE    | ncbi_filtered | 487316  |
| CM009575_2718755_2720291  | 488447  | CM009575        | Burkholderia contaminans strain 170816 chromosome 1, complete sequence, whole genome shotgun sequence | 7-Mar-18      | 14-Mar-18     | 1       |     | Burkholderia contaminans                           | WGS                                    | Burkholderia contaminans                           | 1537   | 0           | 170816          | genomic DNA | blood                                                          |                  | 2718755   | 2720291  | FALSE   | ncbi_filtered | 488447  |
| CM009577_968708_970246    | 488447  | CM009577        | Burkholderia contaminans strain 170816 chromosome 3, complete sequence, whole genome shotgun sequence | 7-Mar-18      | 14-Mar-18     | 1       |     | Burkholderia contaminans                           | WGS                                    | Burkholderia contaminans                           | 1539   | 0           | 170816          | genomic DNA | blood                                                          |                  | 968708    | 970246   | FALSE   | ncbi_filtered | 488447  |
| KY886141_1_1499           | 488447  | KY886141        | Burkholderia contaminans strain TVKG1 16S ribosomal RNA gene, partial sequence                        | 30-May-17     | 4-Jan-18      | 1       |     | Burkholderia contaminans                           |                                        | Burkholderia contaminans                           | 1499   | 0           | TVKG1           | genomic DNA | human blood sample                                             |                  | 1         | 1499     | FALSE   | ncbi_filtered | 488447  |
| MGB64113_1_1416           | 488447  | MGB64113        | Burkholderia contaminans strain AAR-219 16S ribosomal RNA gene, partial sequence                      | 1-Feb-18      | 14-Feb-18     | 1       |     | Burkholderia contaminans                           |                                        | Burkholderia contaminans                           | 1416   | 0           | AAR-219         | genomic DNA | root                                                           |                  | 1         | 1416     | FALSE   | ncbi_filtered | 488447  |
| NZ_CP009745_600466_602003 | 488447  | NZ_CP009745     | Burkholderia contaminans strain MS14 chromosome 3, complete sequence                                  | 6-Apr-17      | 4-Jan-18      | 1       |     | Burkholderia contaminans                           | RefSeq                                 | Burkholderia contaminans                           | 1538   | 0           | MS14            | genomic DNA | Soil                                                           |                  | 600466    | 602003   | FALSE   | ncbi_filtered | 488447  |
| NR_108188_1_1334          | 488454  | NR_108188       | Gemmobacter nanjingensis strain Y12 16S ribosomal RNA gene, partial sequence                          | 3-Feb-15      | 4-Jan-18      | 1       |     | Gemmobacter nanjingensis                           | RefSeq                                 | Gemmobacter nanjingensis                           | 1334   | 0           | Y12             | rRNA        |                                                                |                  | 1         | 1334     | TRUE    | ncbi_filtered | 488454  |
| KF008554_1_1436           | 488729  | KF008554        | Burkholderia metallica strain AH-83 16S ribosomal RNA gene, partial sequence                          | 18-Aug-13     | 4-Jan-18      | 1       |     | Burkholderia metallica                             |                                        | Burkholderia metallica                             | 1436   | 5           | AH-83           | genomic DNA | soil                                                           |                  | 1         | 1436     | FALSE   | ncbi_filtered | 488729  |
| KM019831_1_1392           | 488729  | KM019831        | Burkholderia metallica strain F22 16S ribosomal RNA gene, partial sequence                            | 21-Sep-14     | 4-Jan-18      | 1       |     | Burkholderia metallica                             |                                        | Burkholderia metallica                             | 1392   | 0           | F22             | genomic DNA | soil                                                           |                  | 1         | 1392     | FALSE   | ncbi_filtered | 488729  |
| KM019869_1_1393           | 488729  | KM019869        | Burkholderia metallica strain g33 16S ribosomal RNA gene, partial sequence                            | 21-Sep-14     | 4-Jan-18      | 1       |     | Burkholderia metallica                             |                                        | Burkholderia metallica                             | 1393   | 0           | g33             | genomic DNA | soil                                                           |                  | 1         | 1393     | FALSE   | ncbi_filtered | 488729  |
| NR_042636_1_1505          | 488729  | NR_042636       | Burkholderia metallica strain R-16017 16S ribosomal RNA gene, partial sequence                        | 3-Feb-15      | 4-Jan-18      | 1       |     | Burkholderia metallica                             | RefSeq                                 | Burkholderia metallica                             | 1505   | 0           | R-16017         | rRNA        | cystic fibrosis patient                                        |                  | 1         | 1505     | TRUE    | ncbi_filtered | 488729  |
| NZ_CP013401_17744_19279   | 488729  | NZ_CP013401     | Burkholderia metallica strain FL-6-5-30-S1-D7 chromosome 1, complete sequence                         | 17-Apr-17     | 4-Jan-18      | 1       |     | Burkholderia metallica                             | RefSeq                                 | Burkholderia metallica                             | 1536   | 0           | FL-6-5-30-S1-D7 | genomic DNA |                                                                |                  | 17744     | 19279    | FALSE   | ncbi_filtered | 488729  |
| AB682646_1_1434           | 492736  | AB682646        | Dyadobacter alkalitolerans gene for 16S rRNA, partial sequence, strain: NBRC 107668                   | 28-Jan-12     | 4-Jan-18      | 1       |     | Dyadobacter alkalitolerans                         |                                        | Dyadobacter alkalitolerans                         | 1434   | 0           | NBRC 107668     | genomic DNA |                                                                |                  | 1         | 1434     | FALSE   | ncbi_filtered | 492736  |
| JF496261_1_1381           | 492736  | JF496261        | Dyadobacter alkalitolerans strain XA2-2 16S ribosomal RNA gene, partial sequence                      | 19-Aug-11     | 4-Jan-18      | 1       |     | Dyadobacter alkalitolerans                         |                                        | Dyadobacter alkalitolerans                         | 1381   | 0           | XA2-2           | genomic DNA | soil crust                                                     |                  | 1         | 1381     | FALSE   | ncbi_filtered | 492736  |
| KU258266_1_1309           | 492736  | KU258266        | Dyadobacter alkalitolerans strain BL15 16S ribosomal RNA gene, partial sequence                       | 12-Mar-16     | 4-Jan-18      | 1       |     | Dyadobacter alkalitolerans                         |                                        | Dyadobacter alkalitolerans                         | 1399   | 0           | BL15            | genomic DNA | lithic environment                                             |                  | 1         | 1399     | FALSE   | ncbi_filtered | 492736  |
| JM843375_1_1299           | 493780  | JM843375        | Sphingobacterium anhuiense strain NRA_11 16S ribosomal RNA gene, complete sequence                    | 3-Oct-12      | 4-Jan-18      | 1       |     | Sphingobacterium anhuiense                         |                                        | Sphingobacterium anhuiense                         | 1209   | 0           | NRA_11          | genomic DNA | rhizosphere soil                                               |                  | 1         | 1209     | FALSE   | ncbi_filtered | 493780  |
| KF361511_1_1370           | 493780  | KF361511        | Sphingobacterium anhuiense strain NRA_011 16S ribosomal RNA gene, partial sequence                    | 13-Aug-13     | 4-Jan-18      | 1       |     | Sphingobacterium anhuiense                         |                                        | Sphingobacterium anhuiense                         | 1370   | 0           | NRA_011         | genomic DNA | Arachis hypogaea rhizosphere                                   |                  | 1         | 1370     | FALSE   | ncbi_filtered | 493780  |
| NR_044477_1_1382          | 493780  | NR_044477       | Sphingobacterium anhuiense strain CW 186 16S ribosomal RNA gene, partial sequence                     | 3-Feb-15      | 4-Jan-18      | 1       |     | Sphingobacterium anhuiense                         | RefSeq                                 | Sphingobacterium anhuiense                         | 1382   | 0           | CW 186          | rRNA        |                                                                |                  | 1         | 1382     | TRUE    | ncbi_filtered | 493780  |
| NR_133043_1_1435          | 497967  | NR_133043       | Hymenobacter tibetensis strain XTM003 16S ribosomal RNA, partial sequence                             | 2-Aug-16      | 4-Jan-18      | 1       |     | Hymenobacter tibetensis                            | RefSeq                                 | Hymenobacter tibetensis                            | 1435   | 0           | XTM003          | rRNA        | soil                                                           |                  | 1         | 1435     | TRUE    | ncbi_filtered | 497967  |
| NR_044491_1_1489          | 501496  | NR_044491       | Porphyromonas bennonis strain WAL 1926C 16S ribosomal RNA gene, partial sequence                      | 3-Feb-15      | 4-Jan-18      | 1       |     | Porphyromonas bennonis                             | RefSeq                                 | Porphyromonas bennonis                             | 1489   | 0           | WAL 1926C       | rRNA        |                                                                |                  | 1         | 1489     | TRUE    | ncbi_filtered | 501496  |
| NR_113228_1_1498          | 501496  | NR_113228       | Porphyromonas bennonis strain JCM 16335 16S ribosomal RNA gene, partial sequence                      | 3-Feb-15      | 4-Jan-18      | 1       |     | Porphyromonas bennonis                             | RefSeq                                 | Porphyromonas bennonis                             | 1498   | 0           | JCM 16335       | rRNA        |                                                                |                  | 1         | 1498     | TRUE    | ncbi_filtered | 501496  |
| EU423306_1_1455           | 502393  | EU423306        | Kaistibacter ginsenosidimans strain BN7-7 16S ribosomal RNA gene, partial sequence                    | 24-Nov-15     | 4-Jan-18      | 1       |     | Kaistibacter ginsenosidimans                       |                                        | Kaistibacter ginsenosidimans                       | 1455   | 0           | BN7-7           | genomic DNA | ginseng field soil                                             |                  | 1         | 1455     | FALSE   | ncbi_filtered | 502393  |
| KU86802_1_1358            | 502393  | KU86802         | Gemella asaccharolytica strain KA00071 16S ribosomal RNA gene, partial sequence                       | 27-Aug-14     | 4-Jan-18      | 1       |     | Gemella asaccharolytica                            |                                        | Gemella asaccharolytica                            | 1358   | 2           | KA00071         | genomic DNA | vaginal fluid from subject with bacterial vaginosis            |                  | 1         | 1358     | FALSE   | ncbi_filtered | 502393  |
| NR_104506_1_1403          | 502393  | NR_104506       | Gemella asaccharolytica strain WAL 1945J 16S ribosomal RNA gene, partial sequence                     | 3-Feb-15      | 4-Jan-18      | 1       |     | Gemella asaccharolytica                            | RefSeq                                 | Gemella asaccharolytica                            | 1403   | 0           | WAL 1945J       | rRNA        |                                                                |                  | 1         | 1403     | TRUE    | ncbi_filtered | 502393  |
| NZ_KQ59871_41_1604        | 502393  | NZ_KQ59871      | Gemella asaccharolytica strain KA00071 Scaffold43, whole genome shotgun sequence                      | 16-Apr-17     | 4-Jan-18      | 1       |     | Gemella asaccharolytica                            | WGS,HIGH_QUALITY_DRAFT,RefSeq          | Gemella asaccharolytica                            | 1564   | 0           | KA00071         | genomic DNA | vagina                                                         |                  | 41        | 1604     | FALSE   | ncbi_filtered | 502393  |
| NR_116278_1_1376          | 505248  | NR_116278       | Novosphingobium acidiphilum strain FSW06-204d 16S ribosomal RNA gene, partial sequence                | 3-Feb-15      | 4-Jan-18      | 1       |     | Novosphingobium acidiphilum                        | RefSeq                                 | Novosphingobium acidiphilum                        | 1376   | 0           | FSW06-204d      | rRNA        |                                                                |                  | 1         | 1376     | TRUE    | ncbi_filtered | 505248  |
| NZ_AUBA01000045_294_1764  | 1122612 | NZ_AUBA01000045 | Novosphingobium acidiphilum DSM 19966 G404DRRAFT_scaff000044.44_C, whole genome shotgun sequence      | 17-Apr-17     | 4-Jan-18      | 1       |     | Novosphingobium acidiphilum DSM 19966              | WGS,IMPROVED_HIGH_QUALITY_DRAFT,RefSeq | Novosphingobium acidiphilum DSM 19966              | 1471   | 0           | DSM 19966       | genomic DNA |                                                                |                  |           |          |         |               |         |

| seqname                      | tax_id | accession       | description                                                                                  | modified_date | download_date | version | num_source                    | keywords   | organism                          | length | ambig_count | strain       | mol_type    | isolate | isolation_source                                         | seq_start | seq_stop | is_type | collection    | species |
|------------------------------|--------|-----------------|----------------------------------------------------------------------------------------------|---------------|---------------|---------|-------------------------------|------------|-----------------------------------|--------|-------------|--------------|-------------|---------|----------------------------------------------------------|-----------|----------|---------|---------------|---------|
| KR81437_1_1330               | 525640 | KR81437         | Paracoccus chinensis strain 3-6 16S ribosomal RNA gene, partial sequence                     | 6-Oct-15      | 4-Jan-18      | 1       | Paracoccus chinensis          |            | Paracoccus chinensis              | 1330   | 0           | 6-Mar        | genomic DNA |         |                                                          | 1         | 1330     | FALSE   | ncbi_filtered | 525640  |
| KR99804_1_1326               | 525640 | KR99804         | Paracoccus chinensis strain MCCB 295 16S ribosomal RNA gene, partial sequence                | 20-Mar-16     | 4-Jan-18      | 1       | Paracoccus chinensis          |            | Paracoccus chinensis              | 1326   | 0           | MCCB 295     | genomic DNA |         |                                                          | 1         | 1326     | FALSE   | ncbi_filtered | 525640  |
| NR_116401_1_1362             | 525640 | NR_116401       | Paracoccus chinensis strain IC-11 16S ribosomal RNA gene, partial sequence                   | 3-Feb-15      | 4-Jan-18      | 1       | Paracoccus chinensis          | RefSeq     | Paracoccus chinensis              | 1362   | 0           | KS-11        | rRNA        |         | sediment from Guan Ting reservoir                        | 1         | 1362     | TRUE    | ncbi_filtered | 525640  |
| NZ_FNGE01000043_3802_5192    | 525640 | NZ_FNGE01000043 | Paracoccus chinensis strain CGMCC 1.7655, whole genome shotgun sequence                      | 29-Jul-17     | 4-Jan-18      | 1       | Paracoccus chinensis          | WGS,RefSeq | Paracoccus chinensis              | 1391   | 0           | CGMCC 1.7655 | genomic DNA |         |                                                          | 3802      | 5192     | TRUE    | ncbi_filtered | 525640  |
| NR_112789_1_1468             | 536633 | NR_112789       | Blautia glucerasea strain HFTH-1 16S ribosomal RNA gene, partial sequence                    | 3-Feb-15      | 4-Jan-18      | 1       | Blautia glucerasea            | RefSeq     | Blautia glucerasea                | 1468   | 1           | HFTH-1       | rRNA        |         |                                                          | 1         | 1468     | TRUE    | ncbi_filtered | 536633  |
| NR_113231_1_1491             | 536633 | NR_113231       | Blautia glucerasea strain JCM 17039 16S ribosomal RNA gene, partial sequence                 | 3-Feb-15      | 4-Jan-18      | 1       | Blautia glucerasea            | RefSeq     | Blautia glucerasea                | 1491   | 0           | JCM 17039    | rRNA        |         |                                                          | 1         | 1491     | TRUE    | ncbi_filtered | 536633  |
| KM210261_1_1415              | 538194 | KM210261        | Paracoccus huijuniae strain ADC-1 16S ribosomal RNA gene, partial sequence                   | 21-May-15     | 4-Jan-18      | 1       | Paracoccus huijuniae          |            | Paracoccus huijuniae              | 1415   | 0           | ADC-1        | genomic DNA |         | activated sludge                                         | 1         | 1415     | FALSE   | ncbi_filtered | 538194  |
| KM210262_1_1415              | 538194 | KM210262        | Paracoccus huijuniae strain ADC-15A 16S ribosomal RNA gene, partial sequence                 | 21-May-15     | 4-Jan-18      | 1       | Paracoccus huijuniae          |            | Paracoccus huijuniae              | 1415   | 0           | ADC-15A      | genomic DNA |         | activated sludge                                         | 1         | 1415     | FALSE   | ncbi_filtered | 538194  |
| NR_108224_1_1421             | 538194 | NR_108224       | Paracoccus huijuniae strain FLN-7 16S ribosomal RNA gene, partial sequence                   | 3-Feb-15      | 4-Jan-18      | 1       | Paracoccus huijuniae          | RefSeq     | Paracoccus huijuniae              | 1421   | 0           | FLN-7        | rRNA        |         |                                                          | 1         | 1421     | TRUE    | ncbi_filtered | 538194  |
| NR_132591_1_1470             | 543886 | NR_132591       | Saccharopolyspora endophytica strain YIM 61095 16S ribosomal RNA, partial sequence           | 26-Aug-15     | 4-Jan-18      | 1       | Saccharopolyspora endophytica | RefSeq     | Saccharopolyspora endophytica     | 1470   | 0           | YIM 61095    | rRNA        |         |                                                          | 1         | 1470     | TRUE    | ncbi_filtered | 543886  |
| KF733708_1_1367              | 544580 | KF733708        | Actinomyces oris strain CHDC B391 16S ribosomal RNA gene, partial sequence                   | 14-Jan-14     | 4-Jan-18      | 1       | Actinomyces oris              |            | Actinomyces oris                  | 1366   | 0           | CHDC B391    | genomic DNA |         | oral cavity                                              | 1         | 1366     | FALSE   | ncbi_filtered | 544580  |
| NR_113060_1_1517             | 544580 | NR_113060       | Actinomyces oris strain JCM 16131 16S ribosomal RNA gene, partial sequence                   | 3-Feb-15      | 4-Jan-18      | 1       | Actinomyces oris              | RefSeq     | Actinomyces oris                  | 1517   | 0           | JCM 16131    | rRNA        |         |                                                          | 1         | 1517     | TRUE    | ncbi_filtered | 544580  |
| NZ_CP014232_2482353_2483915  | 544580 | NZ_CP014232     | Actinomyces oris strain T14V, complete genome                                                | 4-Apr-17      | 4-Jan-18      | 1       | Actinomyces oris              | RefSeq     | Actinomyces oris                  | 1563   | 0           | T14V         | genomic DNA |         | curvette                                                 | 2482353   | 2483915  | FALSE   | ncbi_filtered | 544580  |
| NZ_MSKL01000014_95274_96839  | 544580 | NZ_MSKL01000014 | Actinomyces oris strain P6N contig014, whole genome shotgun sequence                         | 6-Apr-17      | 4-Jan-18      | 1       | Actinomyces oris              | WGS,RefSeq | Actinomyces oris                  | 1566   | 0           | P6N          | genomic DNA |         | Plaque                                                   | 95274     | 96839    | FALSE   | ncbi_filtered | 544580  |
| NZ_MSKO01000009_54060_55628  | 544580 | NZ_MSKO01000009 | Actinomyces oris strain F28B1 F28B1 contig009, whole genome shotgun sequence                 | 6-Apr-17      | 4-Jan-18      | 1       | Actinomyces oris              | WGS,RefSeq | Actinomyces oris                  | 1569   | 0           | F28B1        | genomic DNA |         | Plaque (caries +)                                        | 54060     | 55628    | FALSE   | ncbi_filtered | 544580  |
| KP099435_1_1480              | 545533 | KP099435        | Alishewanella jeotgali strain S14 16S ribosomal RNA gene, partial sequence                   | 3-Mar-15      | 4-Jan-18      | 1       | Alishewanella jeotgali        |            | Alishewanella jeotgali            | 1480   | 0           | S14          | genomic DNA |         | Stevia rhizosphere soil                                  | 1         | 1480     | FALSE   | ncbi_filtered | 545533  |
| KT387342_1_1490              | 545533 | KT387342        | Alishewanella jeotgali strain US_38 16S ribosomal RNA gene, partial sequence                 | 19-Jan-16     | 4-Jan-18      | 1       | Alishewanella jeotgali        |            | Alishewanella jeotgali            | 1490   | 0           | US_38        | genomic DNA |         | seafood effluent                                         | 1         | 1490     | FALSE   | ncbi_filtered | 545533  |
| NZ_AHTH01000023_12110_13662  | 545533 | NZ_AHTH01000023 | Alishewanella jeotgali KCTC 22429 contig032, whole genome shotgun sequence                   | 19-Apr-17     | 4-Jan-18      | 1       | Alishewanella jeotgali        | WGS,RefSeq | Alishewanella jeotgali KCTC 22429 | 1553   | 0           | KCTC 22429   | genomic DNA |         | traditional Korean fermented seafood                     | 12110     | 13662    | TRUE    | ncbi_filtered | 545533  |
| NR_116460_1_1431             | 545534 | NR_116460       | Carnobacterium jeotgali strain M53 16S ribosomal RNA gene, partial sequence                  | 3-Feb-15      | 4-Jan-18      | 1       | Carnobacterium jeotgali       | RefSeq     | Carnobacterium jeotgali           | 1431   | 0           | M53          | rRNA        |         | traditional fermented food in Korea                      | 1         | 1431     | TRUE    | ncbi_filtered | 545534  |
| NZ_JEMH01000060_196_1768     | 545534 | NZ_JEMH01000060 | Carnobacterium jeotgali strain M53 KHU-M53 contig_04, whole genome shotgun sequence          | 9-Apr-17      | 4-Jan-18      | 1       | Carnobacterium jeotgali       | WGS,RefSeq | Carnobacterium jeotgali           | 1573   | 0           | M53          | genomic DNA |         | traditional Korean fermented food, jeotgal               | 196       | 1768     | TRUE    | ncbi_filtered | 545534  |
| NZ_JNF01000003_140150_141722 | 545534 | NZ_JNF01000003  | BP18DRAFT_scf7180000000046_quiver_12_C, whole genome shotgun sequence                        | 9-Apr-17      | 4-Jan-18      | 1       | Carnobacterium jeotgali M53   | WGS,RefSeq | Carnobacterium jeotgali M53       | 1573   | 0           | M53          | genomic DNA |         |                                                          | 140150    | 141722   | TRUE    | ncbi_filtered | 545534  |
| NZ_JNF01000007_278599_280172 | 545534 | NZ_JNF01000007  | BP18DRAFT_scf7180000000047_quiver_4_C, whole genome shotgun sequence                         | 9-Apr-17      | 4-Jan-18      | 1       | Carnobacterium jeotgali M53   | WGS,RefSeq | Carnobacterium jeotgali M53       | 1574   | 0           | M53          | genomic DNA |         |                                                          | 278599    | 280172   | TRUE    | ncbi_filtered | 545534  |
| NZ_JNF01000010_641252_642824 | 545534 | NZ_JNF01000010  | BP18DRAFT_scf7180000000060_quiver_7_C, whole genome shotgun sequence                         | 9-Apr-17      | 4-Jan-18      | 1       | Carnobacterium jeotgali M53   | WGS,RefSeq | Carnobacterium jeotgali M53       | 1573   | 0           | M53          | genomic DNA |         |                                                          | 641252    | 642824   | TRUE    | ncbi_filtered | 545534  |
| CP014031_107406_1076257      | 546367 | CP014031        | Hafnia paralvei strain FDAARGOS_158 chromosome, complete genome                              | 16-Feb-18     | 27-Feb-18     | 2       | Hafnia paralvei               |            | Hafnia paralvei                   | 1552   | 0           | FDAARGOS_158 | genomic DNA |         | Stool                                                    | 107406    | 1076257  | FALSE   | ncbi_filtered | 546367  |
| CP014031_129068_130619       | 546367 | CP014031        | Hafnia paralvei strain FDAARGOS_158 chromosome, complete genome                              | 16-Feb-18     | 27-Feb-18     | 2       | Hafnia paralvei               |            | Hafnia paralvei                   | 1552   | 0           | FDAARGOS_158 | genomic DNA |         |                                                          | 129068    | 130619   | FALSE   | ncbi_filtered | 546367  |
| FM179944_1_1495              | 546367 | FM179944        | Hafnia aveli genomsp. 2 partial 16S rRNA gene, culture collection CCL43 419                  | 11-Aug-10     | 4-Jan-18      | 1       | Hafnia paralvei               |            | Hafnia paralvei                   | 1495   | 5           |              | genomic DNA |         |                                                          | 1         | 1495     | FALSE   | ncbi_filtered | 546367  |
| NR_116898_1_1495             | 546367 | NR_116898       | Hafnia paralvei strain ATCC 29927 16S ribosomal RNA gene, partial sequence                   | 3-Feb-15      | 4-Jan-18      | 1       | Hafnia paralvei               | RefSeq     | Hafnia paralvei                   | 1495   | 5           | ATCC 29927   | rRNA        |         |                                                          | 1         | 1495     | TRUE    | ncbi_filtered | 546367  |
| NZ_JHW20100209_175_1272      | 546367 | NZ_JHW20100209  | Hafnia paralvei strain 1133_RAQU 949_2055_155761_924_SIN_487_, whole genome shotgun sequence | 10-Apr-17     | 4-Jan-18      | 1       | Hafnia paralvei               | WGS,RefSeq | Hafnia paralvei                   | 1553   | 0           | 1133_RAQU    | genomic DNA |         |                                                          | 175       | 1272     | FALSE   | ncbi_filtered | 546367  |
| NR_122087_1_1417             | 547122 | NR_122087       | Thioalbus denitrificans strain Su4 16S ribosomal RNA gene, partial sequence                  | 3-Feb-15      | 4-Jan-18      | 1       | Thioalbus denitrificans       | RefSeq     | Thioalbus denitrificans           | 1417   | 0           | Su4          | rRNA        |         |                                                          | 1         | 1417     | TRUE    | ncbi_filtered | 547122  |
| KT735170_1_1330              | 551988 | KT735170        | Duganella radidis strain UFLA02-56 16S ribosomal RNA gene, partial sequence                  | 20-Mar-16     | 4-Jan-18      | 1       | Duganella radidis             |            | Duganella radidis                 | 1330   | 1           | UFLA02-56    | genomic DNA |         | root nodule from plants inoculated with agriculture soil | 1         | 1330     | FALSE   | ncbi_filtered | 551988  |
| LC191531_1_1387              | 551988 | LC191531        | Duganella radidis gene for 16S rRNA, partial sequence, strain: D14                           | 19-Oct-16     | 4-Jan-18      | 1       | Duganella radidis             |            | Duganella radidis                 | 1387   | 0           | D14          | genomic DNA |         |                                                          | 1         | 1387     | FALSE   | ncbi_filtered | 551988  |
| NR_108217_1_1402             | 551988 | NR_108217       | Duganella radidis strain Sac-41 16S ribosomal RNA gene, partial sequence                     | 3-Feb-15      | 4-Jan-18      | 1       | Duganella radidis             | RefSeq     | Duganella radidis                 | 1402   | 0           | Sac-41       | rRNA        |         |                                                          | 1         | 1402     | TRUE    | ncbi_filtered | 551988  |
| KP282808_1_1381              | 553384 | KP282808        | Alishewanella agri strain ZY1-583 16S ribosomal RNA gene, partial sequence                   | 18-May-15     | 4-Jan-18      | 1       | Alishewanella agri            |            | Alishewanella agri                | 1381   | 0           | ZY1-583      | genomic DNA |         | crude oil samples                                        | 1         | 1381     | FALSE   | ncbi_filtered | 553384  |
| NR_116499_1_1425             | 553384 | NR_116499       | Alishewanella agri strain BLO6 16S ribosomal RNA gene, partial sequence                      | 3-Feb-15      | 4-Jan-18      | 1       | Alishewanella agri BLO6       | RefSeq     | Alishewanella agri BLO6           | 1425   | 1           | BLO6         | rRNA        |         | soil sample around an iron-manufacturing company         | 1         | 1425     | TRUE    | ncbi_filtered | 553384  |
| NZ_AKKU01000022_38873_40404  | 553384 | NZ_AKKU01000022 | Alishewanella agri BLO6 contig023, whole genome shotgun sequence                             | 17-Apr-17     | 4-Jan-18      | 1       | Alishewanella agri BLO6       | WGS,RefSeq | Alishewanella agri BLO6           | 1532   | 0           | BLO6         | genomic DNA |         | landfill soil                                            | 38873     | 40404    | TRUE    | ncbi_filtered | 553384  |
| AB688097_1_1510              | 554343 | AB688097        | Psychrobacter piscatorii gene for 16S ribosomal RNA, partial sequence                        | 17-Apr-12     | 4-Jan-18      | 1       | Psychrobacter piscatorii      |            | Psychrobacter piscatorii          | 1510   | 0           |              | genomic DNA |         |                                                          | 1         | 1510     | FALSE   | ncbi_filtered | 554343  |
| KC534186_1_1346              | 554343 | KC534186        | Psychrobacter piscatorii strain VSD07 16S ribosomal RNA gene, partial sequence               | 21-Feb-17     | 4-Jan-18      | 1       | Psychrobacter piscatorii      |            | Psychrobacter piscatorii          | 1346   | 0           | VSD07        | genomic DNA |         | vent sediment                                            | 1         | 1346     | FALSE   | ncbi_filtered | 554343  |
| LN555633_1_1365              | 554343 | LN555633        | Psychrobacter piscatorii partial 16S rRNA gene, isolate 15                                   | 23-Oct-15     | 4-Jan-18      | 1       | Psychrobacter piscatorii      |            | Psychrobacter piscatorii          | 1365   | 2           |              | genomic DNA |         | 15 post larvae                                           | 1         | 1365     | FALSE   | ncbi_filtered | 554343  |
| NZ_LNDI01000022_1_1487       | 554343 | NZ_LNDI01000022 | Psychrobacter piscatorii strain LQ58 contig118, whole genome shotgun sequence                | 16-Apr-17     | 4-Jan-18      | 1       | Psychrobacter piscatorii      | WGS,RefSeq | Psychrobacter piscatorii          | 1487   | 0           | LQ58         | genomic DNA |         | deep-sea hydrothermal vent sediment                      | 1         | 1487     | FALSE   | ncbi_filtered | 554343  |
| NR_104516_1_1268             | 554406 | NR_104516       | Leptotrichia hongkongensis strain HKU24 16S ribosomal RNA gene, partial sequence             | 3-Feb-15      | 4-Jan-18      | 1       | Leptotrichia hongkongensis    | RefSeq     | Leptotrichia hongkongensis        | 1268   | 0           | HKU24        | rRNA        |         |                                                          | 1         | 1268     | TRUE    | ncbi_filtered | 554406  |
| NR_134210_1_1488             | 557450 | NR_134210       | Symbiobacterium turbis strain KY46 16S ribosomal RNA, partial sequence                       | 14-Dec-15     | 4-Jan-18      | 1       | Symbiobacterium turbis        | RefSeq     | Symbiobacterium turbis            | 1488   | 0           | KY46         | rRNA        |         | collected from horned turban shell                       | 1         | 1488     | TRUE    | ncbi_filtered | 557450  |
| KP191984_1_1457              | 558165 | KP191984        | Chryseomicrobium amyolyticum strain BGSPL6 16S ribosomal RNA gene, partial sequence          | 29-Mar-15     | 4-Jan-18      | 1       | Chryseomicrobium amyolyticum  |            | Chryseomicrobium amyolyticum      | 1457   | 0           | BGSPL6       | genomic DNA |         | permafrost soil                                          | 1         | 1457     | FALSE   | ncbi_filtered | 558165  |
| KP771664_1_1465              | 558165 | KP771664        | Chryseomicrobium amyolyticum strain SuMS_N02 16S ribosomal RNA gene, partial sequence        | 19-May-15     | 4-Jan-18      | 1       | Chryseomicrobium amyolyticum  |            | Chryseomicrobium amyolyticum      | 1465   | 0           | SuMS_N02     | genomic DNA |         |                                                          | 1         | 1465     | FALSE   | ncbi_filtered | 558165  |
| KT387997_1_1461              | 558165 | KT387997        | Chryseomicrobium amyolyticum strain RMR41 16S ribosomal RNA gene, partial sequence           | 22-Feb-16     | 4-Jan-18      | 1       | Chryseomicrobium amyolyticum  |            | Chryseomicrobium amyolyticum      | 1461   | 0           | RMR41        | genomic DNA |         | oil-polluted seawater                                    | 1         | 1461     | FALSE   | ncbi_filtered | 558165  |
| KT69852_1_1501               | 558165 | KT69852         | Chryseomicrobium amyolyticum 16S ribosomal RNA gene, partial sequence                        | 14-Sep-15     | 4-Jan-18      | 1       | Chryseomicrobium amyolyticum  |            | Chryseomicrobium amyolyticum      | 1501   | 1           | ID4          | genomic DNA |         | calcium carbonate slurry                                 | 1         | 1501     | FALSE   | ncbi_filtered | 558165  |
| NR_108459_1_1477             | 558165 | NR_108459       | Chryseomicrobium amyolyticum strain IC16 16S ribosomal RNA gene, partial sequence            | 3-Feb-15      | 4-Jan-18      | 1       | Chryseomicrobium amyolyticum  | RefSeq     | Chryseomicrobium amyolyticum      | 1477   | 3           | IC16         | rRNA        |         | host found in arid tropical soil                         | 1         | 1477     | TRUE    | ncbi_filtered | 558165  |
| AB546346_1_1293              | 558537 | AB546346        | Delftia lacustris gene for 16S rRNA, partial sequence, strain: S10K-2                        | 4-Dec-10      | 4-Jan-18      | 1       | Delftia lacustris             |            | Delftia lacustris                 | 1293   | 0           | S10K-2       | genomic DNA |         | activated sludge                                         | 1         | 1293     | FALSE   | ncbi_filtered | 558537  |
| KC790276_1_1426              | 558537 | KC790276        | Delftia lacustris strain RK7 16S ribosomal RNA gene, partial sequence                        | 7-Dec-15      | 4-Jan-18      | 1       | Delftia lacustris             |            | Delftia lacustris                 | 1426   | 0           | RK7          | genomic DNA |         | root                                                     | 1         | 1426     | FALSE   | ncbi_filtered | 558537  |
| KO018383_1_1258              | 558537 | KO018383        | Delftia lacustris strain NCIM2223 16S ribosomal RNA gene, partial sequence                   | 18-Jun-16     | 4-Jan-18      | 1       | Delftia lacustris             |            | Delftia lacustris                 | 1258   | 0           | NCIM2223     | genomic DNA |         |                                                          | 1         | 1258     | FALSE   | ncbi_filtered | 558537  |
| LN95711_1_1485               | 558537 | LN95711         | Delftia lacustris partial 16S rRNA gene, strain R-54356                                      | 7-Dec-16      | 4-Jan-18      | 1       | Delftia lacustris             |            | Delftia lacustris                 | 1485   | 0           | R-54356      | genomic DNA |         |                                                          | 1         | 1485     | FALSE   | ncbi_filtered | 558537  |
| MG322199_1_1339              |        |                 |                                                                                              |               |               |         |                               |            |                                   |        |             |              |             |         |                                                          |           |          |         |               |         |

| seqname                     | tax_id | accession       | description                                                                                             | modified_date | download_date | version | num_source | keywords                      | organism                                         | length | ambig_count | strain              | mol_type    | isolate     | isolation_source                                   | seq_start | seq_stop | is_type | collection    | species |
|-----------------------------|--------|-----------------|---------------------------------------------------------------------------------------------------------|---------------|---------------|---------|------------|-------------------------------|--------------------------------------------------|--------|-------------|---------------------|-------------|-------------|----------------------------------------------------|-----------|----------|---------|---------------|---------|
| KV056171_1_1434             | 566024 | KV056171        | Saccharopolyspora tripterygii strain DB35 16S ribosomal RNA gene, partial sequence                      | 7-Mar-17      | 4-Jan-18      | 1       |            |                               | Saccharopolyspora tripterygii                    | 1434   | 0           | DB35                | genomic DNA |             |                                                    | 1         | 1434     | FALSE   | ncbi_filtered | 566024  |
| MH027619_1_1446             | 566024 | MH027619        | Saccharopolyspora tripterygii strain XHG4-1 16S ribosomal RNA gene, partial sequence                    | 12-Mar-18     | 15-Mar-18     | 1       |            |                               | Saccharopolyspora tripterygii                    | 1446   | 0           | XHG4-1              | genomic DNA |             | Sea mud                                            | 1         | 1446     | FALSE   | ncbi_filtered | 566024  |
| NR_116580_1_1448            | 566024 | NR_116580       | Saccharopolyspora tripterygii                                                                           | 3-Feb-15      | 4-Jan-18      | 1       |            | RefSeq                        | Saccharopolyspora tripterygii                    | 1418   | 0           | YIM 65359           | rRNA        |             | medicinal plant of tropical rainforest             | 1         | 1418     | TRUE    | ncbi_filtered | 566024  |
| JN64553_1_1499              | 566027 | JN64553         | Micrococcus yunnanensis strain BP3_1A 16S ribosomal RNA gene, partial sequence                          | 18-Dec-13     | 4-Jan-18      | 1       |            |                               | Micrococcus yunnanensis                          | 1499   | 0           | BP3_1A              | genomic DNA |             | midgut                                             | 1         | 1499     | FALSE   | ncbi_filtered | 566027  |
| KP296221_1_1274             | 566027 | KP296221        | Micrococcus yunnanensis strain Na448B-4 16S ribosomal RNA gene, partial sequence                        | 31-May-16     | 4-Jan-18      | 1       |            |                               | Micrococcus yunnanensis                          | 1274   | 0           | Na448B-4            | genomic DNA |             | surface seawater of Antarctic                      | 1         | 1274     | FALSE   | ncbi_filtered | 566027  |
| KT899838_1_1370             | 566027 | KT899838        | Micrococcus yunnanensis strain MCCB 352 16S ribosomal RNA gene, partial sequence                        | 20-Mar-16     | 4-Jan-18      | 1       |            |                               | Micrococcus yunnanensis                          | 1370   | 1           | MCCB 352            | genomic DNA |             |                                                    | 1         | 1370     | FALSE   | ncbi_filtered | 566027  |
| KX108873_1_1389             | 566027 | KX108873        | Micrococcus yunnanensis strain KA-20 16S ribosomal RNA gene, partial sequence                           | 19-Dec-16     | 4-Jan-18      | 1       |            |                               | Micrococcus yunnanensis                          | 1389   | 0           | KA-20               | genomic DNA |             | brine (intake Anastasia)                           | 1         | 1389     | FALSE   | ncbi_filtered | 566027  |
| LN774758_1_1285             | 566027 | LN774758        | Micrococcus yunnanensis partial 16S rRNA gene, isolate 0312MAR27A6                                      | 17-Feb-15     | 4-Jan-18      | 1       |            |                               | Micrococcus yunnanensis                          | 1285   | 0           |                     | genomic DNA | 0312MAR27A6 | air sample                                         | 1         | 1285     | FALSE   | ncbi_filtered | 566027  |
| KP057595_1_1248             | 568603 | KP057595        | Jeotgallacoccus nanhaiensis strain NK10 16S ribosomal RNA gene, partial sequence                        | 2-Mar-15      | 4-Jan-18      | 1       |            |                               | Jeotgallacoccus nanhaiensis                      | 1248   | 8           | NK10                | genomic DNA |             |                                                    | 1         | 1248     | FALSE   | ncbi_filtered | 568603  |
| LN812982_1_1472             | 568603 | LN812982        | Jeotgallacoccus nanhaiensis partial 16S rRNA gene, isolate M1870                                        | 13-Apr-15     | 4-Jan-18      | 1       |            |                               | Jeotgallacoccus nanhaiensis                      | 1472   | 0           |                     | genomic DNA | M1870       | Gastric cavity                                     | 1         | 1472     | FALSE   | ncbi_filtered | 568603  |
| NR_116596_1_1452            | 568603 | NR_116596       | Jeotgallacoccus nanhaiensis strain JSM 077023 16S ribosomal RNA gene, partial sequence                  | 3-Feb-15      | 4-Jan-18      | 1       |            | RefSeq                        | Jeotgallacoccus nanhaiensis                      | 1452   | 0           | JSM 077023          | rRNA        |             |                                                    | 1         | 1452     | TRUE    | ncbi_filtered | 568603  |
| NR_116598_1_1484            | 568860 | NR_116598       | Nonomurea wenchengensis strain 210417 16S ribosomal RNA gene, partial sequence                          | 3-Feb-15      | 4-Jan-18      | 1       |            | RefSeq                        | Nonomurea wenchengensis                          | 1484   | 0           | 210417              | rRNA        |             | mangrove soil                                      | 1         | 1484     | TRUE    | ncbi_filtered | 568860  |
| NZ_F0HX01000040_1_1339      | 568860 | NZ_F0HX01000040 | Nonomurea wenchengensis strain CGMCC 4.5598, whole genome shotgun sequence                              | 29-Jul-17     | 4-Jan-18      | 1       |            | WGS,RefSeq                    | Nonomurea wenchengensis                          | 1339   | 0           | CGMCC 4.5598        | genomic DNA |             |                                                    | 1         | 1339     | TRUE    | ncbi_filtered | 568860  |
| NR_112830_1_1413            | 571913 | NR_112830       | Luteipulveratus mangoliensis strain MN07-A0370 16S ribosomal RNA gene, partial sequence                 | 3-Feb-15      | 4-Jan-18      | 1       |            | RefSeq                        | Luteipulveratus mangoliensis                     | 1491   | 0           | MN07-A0370          | rRNA        |             | soil                                               | 1         | 1491     | TRUE    | ncbi_filtered | 571913  |
| NZ_CP011112_2858440_2859969 | 571913 | NZ_CP011112     | Luteipulveratus mangoliensis strain MN07-A0370 genome                                                   | 16-Apr-17     | 4-Jan-18      | 1       |            | RefSeq                        | Luteipulveratus mangoliensis                     | 1530   | 0           | MN07-A0370          | genomic DNA |             | soil                                               | 2858440   | 2859969  | TRUE    | ncbi_filtered | 571913  |
| KC494306_1_1489             | 582607 | KC494306        | Kinneretia asaccharophila strain G1-4-20 16S ribosomal RNA gene, partial sequence                       | 6-Mar-13      | 4-Jan-18      | 1       |            |                               | Kinneretia asaccharophila                        | 1489   | 0           | G1-4-20             | genomic DNA |             | soil of Grove Mountains, East Antarctica           | 1         | 1489     | FALSE   | ncbi_filtered | 582607  |
| KU360713_1_1468             | 582607 | KU360713        | Kinneretia asaccharophila strain BK-77 16S ribosomal RNA gene, partial sequence                         | 31-Dec-17     | 4-Jan-18      | 1       |            |                               | Kinneretia asaccharophila                        | 1468   | 0           | BK-77               | genomic DNA |             | freshwater                                         | 1         | 1468     | FALSE   | ncbi_filtered | 582607  |
| NR_115151_1_1386            | 582607 | NR_115151       | Kinneretia asaccharophila                                                                               | 3-Feb-15      | 4-Jan-18      | 1       |            | RefSeq                        | Kinneretia asaccharophila                        | 1386   | 0           | KIN192              | rRNA        |             | Lake Kinneret                                      | 1         | 1386     | TRUE    | ncbi_filtered | 582607  |
| GQ304892_1_1457             | 586411 | GQ304892        | Jeotgallacoccus halophilus strain YD-9 16S ribosomal RNA gene, partial sequence                         | 15-Feb-11     | 4-Jan-18      | 1       |            |                               | Jeotgallacoccus halophilus                       | 1457   | 0           | YD-9                | genomic DNA |             | saline lakes                                       | 1         | 1457     | FALSE   | ncbi_filtered | 586411  |
| NR_116623_1_1457            | 586411 | NR_116623       | Jeotgallacoccus halophilus strain C1-52 16S ribosomal RNA gene, partial sequence                        | 3-Feb-15      | 4-Jan-18      | 1       |            | RefSeq                        | Jeotgallacoccus halophilus                       | 1457   | 0           | C1-52               | rRNA        |             | salt lake                                          | 1         | 1457     | TRUE    | ncbi_filtered | 586411  |
| NZ_FNF10000025_1_1264       | 586411 | NZ_FNF10000025  | Jeotgallacoccus halophilus strain CGMCC 1.8911, whole genome shotgun sequence                           | 29-Jul-17     | 4-Jan-18      | 1       |            | WGS,RefSeq                    | Jeotgallacoccus halophilus                       | 1264   | 0           | CGMCC 1.8911        | genomic DNA |             |                                                    | 1         | 1264     | TRUE    | ncbi_filtered | 586411  |
| KF453802_1_1429             | 588932 | KF453802        | Brevundimonas naejangsanensis strain ODC-47 16S ribosomal RNA gene, partial sequence                    | 7-Aug-13      | 4-Jan-18      | 1       |            |                               | Brevundimonas naejangsanensis                    | 1425   | 0           | ODC-47              | genomic DNA |             |                                                    | 1         | 1425     | FALSE   | ncbi_filtered | 588932  |
| KM374733_1_1245             | 588932 | KM374733        | Brevundimonas naejangsanensis strain 1352 16S ribosomal RNA gene, partial sequence                      | 22-Nov-14     | 4-Jan-18      | 1       |            |                               | Brevundimonas naejangsanensis                    | 1429   | 0           | 1352                | genomic DNA |             | HCH polluted soil                                  | 1         | 1429     | FALSE   | ncbi_filtered | 588932  |
| KM374767_1_1422             | 588932 | KM374767        | Brevundimonas naejangsanensis strain 553 16S ribosomal RNA gene, partial sequence                       | 22-Nov-14     | 4-Jan-18      | 1       |            |                               | Brevundimonas naejangsanensis                    | 1422   | 0           | 553                 | genomic DNA |             | HCH polluted soil                                  | 1         | 1422     | FALSE   | ncbi_filtered | 588932  |
| NZ_ATYN01000003_639_2104    | 588932 | NZ_ATYN01000003 | Brevundimonas naejangsanensis DSM 23858 H5560DRAFT_scaffold000022_C, whole genome shotgun sequence      | 8-Apr-17      | 4-Jan-18      | 1       |            | WGS,RefSeq                    | Brevundimonas naejangsanensis DSM 23858          | 1466   | 0           | DSM 23858           | genomic DNA |             |                                                    | 639       | 2104     | TRUE    | ncbi_filtered | 588932  |
| KX495275_1_1498             | 589010 | KX495275        | Jeotgallacoccus huakuii strain NBRI12E 16S ribosomal RNA gene, partial sequence                         | 28-Oct-17     | 4-Jan-18      | 1       |            |                               | Jeotgallacoccus huakuii                          | 1498   | 0           | NBRI12E             | genomic DNA |             |                                                    | 1         | 1498     | FALSE   | ncbi_filtered | 589010  |
| KX495292_1_1445             | 589010 | KX495292        | Jeotgallacoccus huakuii strain NBRI13E 16S ribosomal RNA gene, partial sequence                         | 28-Oct-17     | 4-Jan-18      | 1       |            |                               | Jeotgallacoccus huakuii                          | 1445   | 0           | NBRI13E             | genomic DNA |             |                                                    | 1         | 1445     | FALSE   | ncbi_filtered | 589010  |
| NR_116550_1_1508            | 589010 | NR_116550       | Jeotgallacoccus huakuii strain NY-2 16S ribosomal RNA gene, partial sequence                            | 3-Feb-15      | 4-Jan-18      | 1       |            | RefSeq                        | Jeotgallacoccus huakuii                          | 1508   | 0           | NY-2                | rRNA        |             |                                                    | 1         | 1508     | TRUE    | ncbi_filtered | 589010  |
| KT380506_1_1353             | 589035 | KT380506        | Gemmobacter caeni strain B8 16S ribosomal RNA gene, partial sequence                                    | 10-Jan-16     | 4-Jan-18      | 1       |            |                               | Gemmobacter caeni                                | 1353   | 0           | B8                  | genomic DNA |             | biofilms in a river                                | 1         | 1353     | FALSE   | ncbi_filtered | 589035  |
| KT590764_1_1390             | 589035 | KT590764        | Gemmobacter caeni strain SI02 16S ribosomal RNA gene, partial sequence                                  | 20-Mar-16     | 4-Jan-18      | 1       |            |                               | Gemmobacter caeni                                | 1390   | 0           | SI02                | genomic DNA |             | activated sludge                                   | 1         | 1390     | FALSE   | ncbi_filtered | 589035  |
| NR_108321_1_1435            | 589035 | NR_108321       | Gemmobacter caeni strain DCA-1 16S ribosomal RNA gene, partial sequence                                 | 3-Feb-15      | 4-Jan-18      | 1       |            | RefSeq                        | Gemmobacter caeni                                | 1435   | 0           | DCA-1               | rRNA        |             | active sludge from a pesticide manufacturer        | 1         | 1435     | TRUE    | ncbi_filtered | 589035  |
| NR_114305_1_1492            | 589437 | NR_114305       | Prevotella scopos strain JCM 17725 16S ribosomal RNA gene, partial sequence                             | 3-Feb-15      | 4-Jan-18      | 1       |            | RefSeq                        | Prevotella scopos JCM 17725                      | 1492   | 0           | JCM 17725           | rRNA        |             |                                                    | 1         | 1492     | TRUE    | ncbi_filtered | 589437  |
| NZ_BAKP01000095_1_1543      | 589437 | NZ_BAKP01000095 | Prevotella scopos JCM 17725, whole genome shotgun sequence                                              | 9-Apr-17      | 4-Jan-18      | 1       |            | WGS,RefSeq,STANDARD_DRAFT     | Prevotella scopos JCM 17725                      | 1541   | 0           | JCM 17725           | genomic DNA |             |                                                    | 3         | 1543     | TRUE    | ncbi_filtered | 589437  |
| NR_112876_1_1476            | 591198 | NR_112876       | Euzeyba tangierina strain F10 16S ribosomal RNA, partial sequence                                       | 11-Jul-16     | 4-Jan-18      | 1       |            | RefSeq                        | Euzeyba tangierina                               | 1476   | 0           | F10                 | rRNA        |             |                                                    | 1         | 1476     | TRUE    | ncbi_filtered | 591198  |
| NR_116747_1_1404            | 592978 | NR_116747       | Ruminococcus faecis strain Eg2 16S ribosomal RNA gene, partial sequence                                 | 2-Sep-15      | 4-Jan-18      | 1       |            | RefSeq                        | Ruminococcus faecis JCM 15917                    | 1404   | 0           | Eg2                 | rRNA        |             | stool sample                                       | 1         | 1404     | TRUE    | ncbi_filtered | 592978  |
| NZ_BBDW01000030_52_1611     | 592978 | NZ_BBDW01000030 | Ruminococcus faecis JCM 15917, whole genome shotgun sequence                                            | 16-Apr-17     | 4-Jan-18      | 1       |            | WGS,RefSeq,STANDARD_DRAFT     | Ruminococcus faecis JCM 15917                    | 1560   | 0           | JCM 15917           | genomic DNA |             |                                                    | 52        | 1611     | TRUE    | ncbi_filtered | 592978  |
| MF170833_1_1387             | 595670 | MF170833        | Acinetobacter kyonggiensis strain XZN8-3 16S ribosomal RNA gene, partial sequence                       | 26-Mar-18     | 28-Mar-18     | 1       |            |                               | Acinetobacter kyonggiensis                       | 1387   | 0           | XZN8-3              | genomic DNA |             | on the surface of stalactite                       | 1         | 1387     | FALSE   | ncbi_filtered | 595670  |
| NZ_FNPK01000055_3851_5437   | 595670 | NZ_FNPK01000055 | Acinetobacter kyonggiensis strain ANC 5109, whole genome shotgun sequence                               | 29-Jul-17     | 4-Jan-18      | 1       |            | WGS,RefSeq                    | Acinetobacter kyonggiensis                       | 1587   | 0           | ANC 5109            | genomic DNA |             |                                                    | 3851      | 5437     | FALSE   | ncbi_filtered | 595670  |
| AB480535_1_1493             | 596085 | AB480535        | Prevotella auranticaea strain 16S ribosomal RNA, partial sequence                                       | 9-Nov-12      | 4-Jan-18      | 1       |            |                               | Prevotella auranticaea                           | 1493   | 0           | JCM 15755           | genomic DNA | OMA130      | periodontal pocket of a patient with periodontitis | 1         | 1493     | FALSE   | ncbi_filtered | 596085  |
| NZ_BAKF01000105_72_1610     | 596085 | NZ_BAKF01000105 | Prevotella auranticaea JCM 15754, whole genome shotgun sequence                                         | 17-Apr-17     | 4-Jan-18      | 1       |            | WGS,RefSeq,STANDARD_DRAFT     | Prevotella auranticaea JCM 15754                 | 1539   | 0           | JCM 15754           | genomic DNA |             |                                                    | 72        | 1610     | TRUE    | ncbi_filtered | 596085  |
| NR_116569_1_1409            | 598660 | NR_116569       | Corynebacterium pyruvicoproductens strain 06-17730 16S ribosomal RNA gene, partial sequence             | 3-Feb-15      | 4-Jan-18      | 1       |            | RefSeq                        | Corynebacterium pyruvicoproductens ATCC BAA-1742 | 1409   | 0           | 06-17730            | rRNA        |             | groin abscess sample                               | 1         | 1409     | TRUE    | ncbi_filtered | 598660  |
| NZ_KE150446_1461906_1463446 | 598660 | NZ_KE150446     | Corynebacterium pyruvicoproductens ATCC BAA-1742 acArw-supercnt.1, whole genome shotgun sequence        | 17-Apr-17     | 4-Jan-18      | 1       |            | WGS,HIGH_QUALITY_DRAFT,RefSeq | Corynebacterium pyruvicoproductens ATCC BAA-1742 | 1541   | 0           | ATCC BAA-1742       | genomic DNA |             |                                                    | 1461906   | 1463446  | TRUE    | ncbi_filtered | 598660  |
| NZ_KE150446_48_1588         | 598660 | NZ_KE150446     | Corynebacterium pyruvicoproductens ATCC BAA-1742 acArw-supercnt.1, whole genome shotgun sequence        | 17-Apr-17     | 4-Jan-18      | 1       |            | WGS,HIGH_QUALITY_DRAFT,RefSeq | Corynebacterium pyruvicoproductens ATCC BAA-1742 | 1541   | 0           | ATCC BAA-1742       | genomic DNA |             |                                                    | 48        | 1588     | TRUE    | ncbi_filtered | 598660  |
| PKH001000001_460253_461788  | 598660 | PKH001000001    | Corynebacterium pyruvicoproductens strain UMB0763 ER1203633.17957_1_45.1, whole genome shotgun sequence | 28-Dec-17     | 4-Jan-18      | 1       |            | WGS                           | Corynebacterium pyruvicoproductens               | 1536   | 0           | UMB0763             | genomic DNA |             |                                                    | 460253    | 461788   | FALSE   | ncbi_filtered | 598660  |
| AB485742_1_1366             | 610243 | AB485742        | Asaia platycodi gene for 16S rRNA, partial sequence, strain T-671                                       | 27-Jan-11     | 4-Jan-18      | 1       |            |                               | Asaia platycodi                                  | 1366   | 0           | T-671               | genomic DNA |             | flower (unidentified)                              | 1         | 1366     | FALSE   | ncbi_filtered | 610243  |
| JF514557_1_1453             | 610243 | JF514557        | Asaia platycodi 16S ribosomal RNA gene, partial sequence                                                | 25-Jul-11     | 4-Jan-18      | 1       |            |                               | Asaia platycodi                                  | 1453   | 0           | A56                 | genomic DNA |             |                                                    | 1         | 1453     | FALSE   | ncbi_filtered | 610243  |
| NZ_BAKW01000028_3838_5330   | 610243 | NZ_BAKW01000028 | Asaia platycodi JCM 25414, whole genome shotgun sequence                                                | 9-Apr-17      | 4-Jan-18      | 1       |            | WGS,RefSeq,STANDARD_DRAFT     | Asaia platycodi JCM 25414                        | 1493   | 0           | JCM 25414           | genomic DNA |             |                                                    | 3838      | 5330     | TRUE    | ncbi_filtered | 610243  |
| NZ_CBLX01000024_671_2164    | 610243 | NZ_CBLX01000024 | Asaia platycodi SF2.1, whole genome shotgun sequence                                                    | 9-Apr-17      | 4-Jan-18      | 1       |            | WGS,RefSeq                    | Asaia platycodi SF2.1                            | 1494   | 0           | SF2.1               | genomic DNA |             |                                                    | 671       | 2164     | TRUE    | ncbi_filtered | 610243  |
| NR_116814_1_1594            | 617123 | NR_116814       | Lachnoaerobaculum umeense strain CD3_22 16S ribosomal RNA, partial sequence                             | 16-Jun-15     | 4-Jan-18      | 1       |            | RefSeq                        | Lachnoaerobaculum umeense                        | 1594   | 0           | CD3_22              | rRNA        |             |                                                    | 1         | 1594     | TRUE    | ncbi_filtered | 617123  |
| F1715928_1_1401             | 620903 | F1715928        | Negativicoccus succinicivorus strain ADV 12/03/04-B-1155 16S ribosomal RNA gene, partial sequence       | 21-Oct-10     | 4-Jan-18      | 1       |            |                               | Negativicoccus succinicivorus                    | 1401   | 0           | ADV 12/03/04-B-1155 | genomic DNA |             |                                                    | 1         | 1401     | FALSE   | ncbi_filtered | 620903  |
| F1715929_1_1401             | 620903 | F1715929        | Negativicoccus succinicivorus strain ADV 03/08/05-B-3158 16S ribosomal RNA gene, partial sequence       | 21-Oct-10     | 4-Jan-18      | 1       |            |                               | Negativicoccus succinicivorus                    | 1401   | 0           | ADV 03/08/05-B-3158 | genomic DNA |             |                                                    | 1         | 1401     | FALSE   |               |         |

| seqname                    | tax_id  | accession       | description                                                                                              | modified_date | download_date | version_num | source                                | keywords                      | organism                              | length | ambig_count | strain     | mol_type    | isolate | isolation_source                                               | seq_start | seq_stop | isotype | collection      | species |
|----------------------------|---------|-----------------|----------------------------------------------------------------------------------------------------------|---------------|---------------|-------------|---------------------------------------|-------------------------------|---------------------------------------|--------|-------------|------------|-------------|---------|----------------------------------------------------------------|-----------|----------|---------|-----------------|---------|
| NZ_AG8X0100008_05981_52509 | 1074488 | NZ_AG8X0100008  | Brachy bacterium squillum M-6-3 50.WUPEI.1.00008, whole genome shotgun sequence                          | 17-Apr-17     | 4-Jan-18      | 1           | Brachy bacterium squillum M-6-3       | WGS;RefSeq                    | Brachy bacterium squillum M-6-3       | 1529   | 0           | M-6-3      | genomic DNA |         | isolated from salt-fermented seafood                           | 50981     | 52509    | TRUE    | ncbi_filtered   | 661979  |
| GQ344406_1_1343            | 663580  | GQ344406        | Phycococcus ochangensis strain B5a-b5 16S ribosomal RNA gene, partial sequence                           | 1-Sep-15      | 4-Jan-18      | 2           | Phycococcus ochangensis               |                               | Phycococcus ochangensis               | 1343   | 0           | B5a-b5     | genomic DNA |         | potato field soil                                              | 1         | 1343     | FALSE   | ncbi_filtered   | 663580  |
| GQ344407_1_1411            | 663580  | GQ344407        | Phycococcus ochangensis strain N50-3 16S ribosomal RNA gene, partial sequence                            | 9-Aug-09      | 4-Jan-18      | 1           | Phycococcus ochangensis               |                               | Phycococcus ochangensis               | 1411   | 0           | N50-3      | genomic DNA |         | potato field soil                                              | 1         | 1411     | FALSE   | ncbi_filtered   | 663580  |
| KY195073_1_1450            | 663580  | KY195073        | Phycococcus ochangensis strain HK512 16S ribosomal RNA gene, partial sequence                            | 20-Mar-16     | 4-Jan-18      | 1           | Phycococcus ochangensis               |                               | Phycococcus ochangensis               | 1450   | 0           | HK512      | genomic DNA |         | ginseeng soil                                                  | 1         | 1450     | FALSE   | ncbi_filtered   | 663580  |
| NR_132688_1_1411           | 663580  | NR_132688       | Phycococcus ochangensis strain L1b-b9 16S ribosomal RNA, partial sequence                                | 10-Sep-15     | 4-Jan-18      | 1           | Phycococcus ochangensis               | RefSeq                        | Phycococcus ochangensis               | 1411   | 0           | L1b-b9     | rRNA        |         | potato field soil                                              | 1         | 1411     | TRUE    | ncbi_filtered   | 663580  |
| KU150721_1_1432            | 666702  | KU150721        | Undibacterium oligocarboniphilum 16S ribosomal RNA gene, partial sequence                                | 1-Apr-14      | 4-Jan-18      | 1           | Undibacterium oligocarboniphilum      |                               | Undibacterium oligocarboniphilum      | 1432   | 0           | XKE12.1    | genomic DNA |         | petroleum contaminated soil                                    | 1         | 1432     | FALSE   | ncbi_filtered   | 666702  |
| NR_117348_1_1527           | 666702  | NR_117348       | Undibacterium oligocarboniphilum strain EM 1 16S ribosomal RNA gene, partial sequence                    | 3-Feb-15      | 4-Jan-18      | 1           | Undibacterium oligocarboniphilum      | RefSeq                        | Undibacterium oligocarboniphilum      | 1427   | 1           | EM 1       | rRNA        |         | purified water system                                          | 1         | 1527     | TRUE    | ncbi_filtered   | 666702  |
| KC854987_1_1470            | 667306  | KC854987        | UNVERIFIED: Aciditermonas ferrireducens strain WWH25 16S ribosomal RNA gene, partial sequence            | 26-Aug-13     | 4-Jan-18      | 1           | Aciditermonas ferrireducens           | UNVERIFIED_ORGANISM           | Aciditermonas ferrireducens           | 1470   | 0           | WWH25      | genomic DNA |         | ginerg foundation soil                                         | 1         | 1470     | FALSE   | ncbi_filtered   | 667306  |
| NR_112972_1_1483           | 1294026 | NR_112972       | Aciditermonas ferrireducens strain IC-180 16S ribosomal RNA gene, partial sequence                       | 3-Feb-15      | 4-Jan-18      | 1           | Aciditermonas ferrireducens           | RefSeq                        | Aciditermonas ferrireducens           | 1483   | 0           | IC-180     | rRNA        |         | solfataric soil                                                | 1         | 1483     | TRUE    | ncbi_filtered   | 667306  |
| NR_114296_1_1454           | 672093  | NR_114296       | Segetibacter aerophilus strain NBRC106135 16S ribosomal RNA gene, partial sequence                       | 3-Feb-15      | 4-Jan-18      | 1           | Segetibacter aerophilus               | RefSeq                        | Segetibacter aerophilus               | 1454   | 0           | NBRC106135 | rRNA        |         | soil                                                           | 1         | 1454     | TRUE    | ncbi_filtered   | 672093  |
| GQ422736_1_1507            | 524034  | GQ422736        | Alloprevotella rava strain F0020 16S ribosomal RNA gene, partial sequence                                | 16-Jan-13     | 4-Jan-18      | 1           | Alloprevotella rava                   |                               | Alloprevotella rava                   | 1507   | 0           | F0020      | genomic DNA |         | dental plaque                                                  | 1         | 1507     | FALSE   | ncbi_filtered   | 671218  |
| JQ039190_1_1455            | 671218  | JQ039190        | Alloprevotella rava strain W6968 16S ribosomal RNA gene, partial sequence                                | 16-Jan-13     | 4-Jan-18      | 1           | Alloprevotella rava                   |                               | Alloprevotella rava                   | 1455   | 5           | W6968      | genomic DNA |         | soil                                                           | 1         | 1455     | FALSE   | ncbi_filtered   | 671218  |
| NR_118334_1_1455           | 671218  | NR_118334       | Alloprevotella rava strain 81/4-12 16S ribosomal RNA gene, partial sequence                              | 3-Feb-15      | 4-Jan-18      | 1           | Alloprevotella rava                   | RefSeq                        | Alloprevotella rava                   | 1455   | 2           | 81/4-12    | rRNA        |         | soil                                                           | 1         | 1455     | TRUE    | ncbi_filtered   | 671218  |
| NZ_HJ376842_3659_5199      | 673921  | NZ_HJ376842     | Alloprevotella rava F0323 supercont1.16, whole genome shotgun sequence                                   | 17-Apr-17     | 4-Jan-18      | 1           | Alloprevotella rava F0323             | WGS;HIGH_QUALITY_DRAFT;RefSeq | Alloprevotella rava F0323             | 1541   | 0           | F0323      | genomic DNA |         | oral cavity                                                    | 3659      | 5199     | FALSE   | ncbi_filtered   | 671218  |
| NR_108608_1_1435           | 679129  | NR_108608       | Blastococcus endophyitic strain YIM 68236 16S ribosomal RNA gene, partial sequence                       | 3-Feb-15      | 4-Jan-18      | 1           | Blastococcus endophyitic              |                               | Blastococcus endophyitic              | 1435   | 0           | YIM 68236  | rRNA        |         | soil                                                           | 1         | 1435     | TRUE    | ncbi_filtered   | 673521  |
| NZ_F0E01000030_64_1593     | 673521  | NZ_F0E01000030  | Blastococcus endophyitic strain DSM 45413, whole genome shotgun sequence                                 | 29-Jul-17     | 4-Jan-18      | 1           | Blastococcus endophyitic              | WGS;RefSeq                    | Blastococcus endophyitic              | 1530   | 0           | DSM 45413  | genomic DNA |         | soil                                                           | 64        | 1593     | TRUE    | ncbi_filtered   | 673521  |
| NR_112991_1_1477           | 673954  | NR_112991       | Arsenicoccus picis strain K64-19 16S ribosomal RNA gene, partial sequence                                | 3-Feb-15      | 4-Jan-18      | 1           | Arsenicoccus picis                    | RefSeq                        | Arsenicoccus picis                    | 1477   | 1           | K64-19     | rRNA        |         | intestinal tract of fish                                       | 1         | 1477     | TRUE    | ncbi_filtered   | 673954  |
| HF952547_1_1424            | 674054  | HF952547        | Pseudomonas baetica strain HMGU167 16S ribosomal RNA gene, partial sequence                              | 26-Apr-13     | 4-Jan-18      | 1           | Pseudomonas baetica                   |                               | Pseudomonas baetica                   | 1424   | 7           | HMGU167    | genomic DNA |         | rhizosphere soil                                               | 1         | 1424     | FALSE   | ncbi_filtered   | 674054  |
| JX501689_1_1452            | 674054  | JX501689        | Pseudomonas baetica strain K9C3 16S ribosomal RNA gene, partial sequence                                 | 30-Jan-13     | 4-Jan-18      | 1           | Pseudomonas baetica                   |                               | Pseudomonas baetica                   | 1452   | 0           | K9C3       | genomic DNA |         | soil                                                           | 1         | 1452     | FALSE   | ncbi_filtered   | 674054  |
| JX840394_1_1463            | 674054  | JX840394        | Pseudomonas baetica strain CCNQLS18 16S ribosomal RNA gene, partial sequence                             | 9-Sep-14      | 4-Jan-18      | 1           | Pseudomonas baetica                   |                               | Pseudomonas baetica                   | 1463   | 0           | CCNQLS18   | genomic DNA |         | soil                                                           | 1         | 1463     | FALSE   | ncbi_filtered   | 674054  |
| KC790260_1_1437            | 674054  | KC790260        | Pseudomonas baetica strain PN4 16S ribosomal RNA gene, partial sequence                                  | 7-Dec-15      | 4-Jan-18      | 1           | Pseudomonas baetica                   |                               | Pseudomonas baetica                   | 1437   | 0           | PN4        | genomic DNA |         | petiole                                                        | 1         | 1437     | FALSE   | ncbi_filtered   | 674054  |
| KY614188_1_1479            | 674054  | KY614188        | Pseudomonas baetica strain LMTK43 16S ribosomal RNA gene, partial sequence                               | 20-Feb-17     | 4-Jan-18      | 1           | Pseudomonas baetica                   |                               | Pseudomonas baetica                   | 1479   | 0           | LMTK43     | genomic DNA |         | soil                                                           | 1         | 1479     | FALSE   | ncbi_filtered   | 674054  |
| MG461542_1_1419            | 682973  | MG461542        | Chryseomicrobium palamuruense strain G57 16S ribosomal RNA gene, partial sequence                        | 15-Nov-17     | 4-Jan-18      | 1           | Chryseomicrobium palamuruense         |                               | Chryseomicrobium palamuruense         | 1419   | 0           | G57        | genomic DNA |         | Magnesium Soil                                                 | 1         | 1419     | FALSE   | ncbi_filtered   | 682973  |
| NR_151985_1_1502           | 682973  | NR_151985       | Chryseomicrobium palamuruense strain PU1 16S ribosomal RNA, partial sequence                             | 15-Nov-17     | 4-Jan-18      | 1           | Chryseomicrobium palamuruense         | RefSeq                        | Chryseomicrobium palamuruense         | 1502   | 0           | PU1        | rRNA        |         | soil sample                                                    | 1         | 1502     | TRUE    | ncbi_filtered   | 682973  |
| JF505970_1_1379            | 681353  | JF505970        | Chryseomicrobium imtechense strain KNUC9036 16S ribosomal RNA gene, partial sequence                     | 6-Jul-11      | 4-Jan-18      | 1           | Chryseomicrobium imtechense           |                               | Chryseomicrobium imtechense           | 1379   | 0           | KNUC9036   | genomic DNA |         | concrete structure                                             | 1         | 1379     | FALSE   | ncbi_filtered   | 681353  |
| JN128235_1_1441            | 681353  | JN128235        | Chryseomicrobium imtechense strain HNS001 16S ribosomal RNA gene, partial sequence                       | 4-Apr-14      | 4-Jan-18      | 1           | Chryseomicrobium imtechense           |                               | Chryseomicrobium imtechense           | 1441   | 1           | HNS001     | genomic DNA |         | marine sponge                                                  | 1         | 1441     | FALSE   | ncbi_filtered   | 681353  |
| JQ684230_1_1419            | 681353  | JQ684230        | Chryseomicrobium imtechense strain HWG-A7 16S ribosomal RNA gene, partial sequence                       | 19-May-12     | 4-Jan-18      | 1           | Chryseomicrobium imtechense           |                               | Chryseomicrobium imtechense           | 1519   | 3           | HWG-A7     | genomic DNA |         | permafrost soil samples from Kunlun Mountains Pass, Mt. Kunlun | 1         | 1519     | FALSE   | ncbi_filtered   | 681353  |
| KM261524_1_1563            | 681353  | KM261524        | Chryseomicrobium imtechense strain HTB4 16S ribosomal RNA gene, partial sequence                         | 23-Nov-14     | 4-Jan-18      | 1           | Chryseomicrobium imtechense           |                               | Chryseomicrobium imtechense           | 1463   | 0           | HTB4       | genomic DNA |         | groundwater                                                    | 1         | 1463     | FALSE   | ncbi_filtered   | 681353  |
| NR_117419_1_1430           | 681353  | NR_117419       | Chryseomicrobium imtechense strain MW 10 16S ribosomal RNA gene, partial sequence                        | 3-Feb-15      | 4-Jan-18      | 1           | Chryseomicrobium imtechense           | RefSeq                        | Chryseomicrobium imtechense           | 1430   | 0           | MW 10      | rRNA        |         | mineral water                                                  | 1         | 1430     | TRUE    | ncbi_filtered   | 681353  |
| KU057801_1_1203            | 684066  | KU057801        | Streptococcus lactarius strain CNM 170-15 16S ribosomal RNA gene, partial sequence                       | 3-Apr-16      | 4-Jan-18      | 1           | Streptococcus lactarius               |                               | Streptococcus lactarius               | 1203   | 0           | CNM 170-15 | genomic DNA |         | wound exudate                                                  | 1         | 1203     | FALSE   | ncbi_filtered   | 684066  |
| NR_117425_1_1452           | 684066  | NR_117425       | Streptococcus lactarius strain MV1 16S ribosomal RNA gene, partial sequence                              | 3-Feb-15      | 4-Jan-18      | 1           | Streptococcus lactarius               | RefSeq                        | Streptococcus lactarius               | 1452   | 0           | MV1        | rRNA        |         | breast milk from healthy woman                                 | 1         | 1452     | TRUE    | ncbi_filtered   | 684066  |
| 11314-4                    | 699192  | GQ800641        | Megaspheera genomosp. type_1                                                                             | 699192        |               |             | Megaspheera genomosp. type_1          |                               | Megaspheera genomosp. type_1          | 900    | 0           |            |             |         |                                                                | 1         | 900      | TRUE    | fredricks_clone | 699192  |
| 1270-19                    | 699218  | GQ800642        | Megaspheera genomosp. type_1                                                                             | 699218        |               |             | Megaspheera genomosp. type_1          |                               | Megaspheera genomosp. type_1          | 900    | 0           |            |             |         |                                                                | 1         | 900      | TRUE    | fredricks_clone | 699192  |
| NZ_ADGP01000010_162_1734   | 699218  | NZ_ADGP01000010 | Megaspheera genomosp. type_1 str. 28L contig00059, whole genome shotgun sequence                         | 17-Apr-17     | 4-Jan-18      | 1           | Megaspheera genomosp. type_1 str. 28L | WGS;RefSeq                    | Megaspheera genomosp. type_1 str. 28L | 1573   | 0           | 28L        | genomic DNA |         | biological product [EVO:02000043]                              | 162       | 1734     | TRUE    | ncbi_filtered   | 699192  |
| NFMF0100009_69987_71286    | 699193  | NFMF0100009     | Megaspheera genomosp. type_2 strain KA00229 Contig_9_c consensus sequence, whole genome shotgun sequence | 18-Jan-18     | 22-Jan-18     | 1           | Megaspheera genomosp. type_2          | WGS                           | Megaspheera genomosp. type_2          | 1300   | 1           | KA00229    | genomic DNA |         | vagina                                                         | 69987     | 71286    | FALSE   | ncbi_filtered   | 699193  |
| NR_132667_1_1363           | 707214  | NR_132667       | Novosphingobium sediminis strain YG-17 16S ribosomal RNA, partial sequence                               | 10-Sep-15     | 4-Jan-18      | 1           | Novosphingobium sediminis             | RefSeq                        | Novosphingobium sediminis             | 1363   | 0           | YG-17      | rRNA        |         | lake sediment                                                  | 1         | 1363     | TRUE    | ncbi_filtered   | 707214  |
| JQ282817_1_1272            | 709510  | JQ282817        | Jeotgalloccus aerolatus strain RKHC-28 16S ribosomal RNA gene, complete sequence                         | 29-Oct-13     | 4-Jan-18      | 1           | Jeotgalloccus aerolatus               |                               | Jeotgalloccus aerolatus               | 1272   | 0           | RKHC-28    | genomic DNA |         | soil                                                           | 1         | 1272     | FALSE   | ncbi_filtered   | 709510  |
| KY989860_1_1411            | 709510  | KY989860        | Jeotgalloccus aerolatus strain MPA-33 16S ribosomal RNA gene, partial sequence                           | 26-Mar-16     | 4-Jan-18      | 1           | Jeotgalloccus aerolatus               |                               | Jeotgalloccus aerolatus               | 1470   | 0           | MPA-33     | genomic DNA |         | marine grass                                                   | 1         | 1470     | TRUE    | ncbi_filtered   | 709510  |
| KU922214_1_1411            | 709510  | KU922214        | Jeotgalloccus aerolatus strain D56 16S ribosomal RNA gene, partial sequence                              | 14-Jan-17     | 4-Jan-18      | 1           | Jeotgalloccus aerolatus               |                               | Jeotgalloccus aerolatus               | 1411   | 0           | D56        | genomic DNA |         | air                                                            | 1         | 1411     | FALSE   | ncbi_filtered   | 709510  |
| NR_117491_1_1326           | 709510  | NR_117491       | Jeotgalloccus aerolatus strain MPA-33 16S ribosomal RNA gene, partial sequence                           | 3-Feb-15      | 4-Jan-18      | 1           | Jeotgalloccus aerolatus               | RefSeq                        | Jeotgalloccus aerolatus               | 1326   | 9           | MPA-33     | rRNA        |         | air from turkey fattening industry                             | 1         | 1326     | TRUE    | ncbi_filtered   | 709510  |
| KM287569_1_1490            | 721785  | KM287569        | Acidovorax ebreus strain LS-1 16S ribosomal RNA gene, partial sequence                                   | 10-Nov-14     | 4-Jan-18      | 1           | Acidovorax ebreus                     |                               | Acidovorax ebreus                     | 1490   | 0           | YW12       | genomic DNA |         | active sludge                                                  | 1         | 1490     | FALSE   | ncbi_filtered   | 721785  |
| KU041595_1_1498            | 721785  | KU041595        | Acidovorax ebreus strain N8.8 16S ribosomal RNA gene, partial sequence                                   | 17-Nov-15     | 4-Jan-18      | 1           | Acidovorax ebreus                     |                               | Acidovorax ebreus                     | 1498   | 0           | N8.8       | genomic DNA |         | gut                                                            | 1         | 1498     | FALSE   | ncbi_filtered   | 721785  |
| MF565842_1_1425            | 721785  | MF565842        | Acidovorax ebreus strain LS-1 16S ribosomal RNA gene, partial sequence                                   | 1-Aug-17      | 4-Jan-18      | 1           | Acidovorax ebreus                     |                               | Acidovorax ebreus                     | 1425   | 0           | LS-1       | genomic DNA |         | soil                                                           | 1         | 1425     | FALSE   | ncbi_filtered   | 721785  |
| NR_126172_1_1508           | 732238  | NR_126172       | Povallbacter uvarium strain Zumi 37 16S ribosomal RNA gene, partial sequence                             | 3-Feb-15      | 4-Jan-18      | 1           | Povallbacter uvarium                  | RefSeq                        | Povallbacter uvarium                  | 1508   | 0           | Zumi 37    | rRNA        |         | soil                                                           | 1         | 1508     | TRUE    | ncbi_filtered   | 732238  |
| NR_117555_1_1463           | 755171  | NR_117555       | Peptoniphilus tyrelliae strain RMA 19911 16S ribosomal RNA gene, partial sequence                        | 3-Feb-15      | 4-Jan-18      | 1           | Peptoniphilus tyrelliae               | RefSeq                        | Peptoniphilus tyrelliae               | 1463   | 0           | RMA 19911  | rRNA        |         | leg                                                            | 1         | 1463     | TRUE    | ncbi_filtered   | 755171  |
| NR_117556_1_1465           | 755172  | NR_117556       | Peptoniphilus coxii strain RMA 16757 16S ribosomal RNA gene, partial sequence                            | 3-Feb-15      | 4-Jan-18      | 1           | Peptoniphilus coxii                   | RefSeq                        | Peptoniphilus coxii                   | 1465   | 0           | RMA 16757  | rRNA        |         | leg                                                            | 1         | 1465     | TRUE    | ncbi_filtered   | 755172  |
| NZ_KQ960161_100_1639       | 755172  | NZ_KQ960161     | Peptoniphilus coxii strain DNF0729 Scaffold28, whole genome shotgun sequence                             | 16-Apr-17     | 4-Jan-18      | 1           | Peptoniphilus coxii                   | WGS;HIGH_QUALITY_DRAFT;RefSeq | Peptoniphilus coxii                   | 1540   | 0           | DNF0729    | genomic DNA |         | vagina                                                         | 100       | 1639     | FALSE   | ncbi_filtered   | 755172  |
| CP024620_3123129_3124674   | 756892  | CP024620        | Acinetobacter indicus strain SGAI0564 chromosome, complete genome                                        | 22-Feb-18     | 27-Feb-18     | 1           | Acinetobacter indicus                 |                               | Acinetobacter indicus                 | 1546   | 0           | SGAI0564   | genomic DNA |         | air                                                            | 3123129   | 3124674  | FALSE   | ncbi_filtered   | 756892  |
| KY982939_1_1298            | 756892  | KY982939        | Acinetobacter indicus strain IR6 16S ribosomal RNA gene, partial sequence                                | 30-Oct-17     | 4-Jan-18      | 1           | Acinetobacter indicus                 |                               | Acinetobacter indicus                 | 1298   | 0           | IR6        | genomic DNA |         | soil                                                           | 1         | 1298     | FALSE   | ncbi_filtered   | 756892  |
| MG283297_1_1375            | 756892  | MG283297        | Acinetobacter indicus strain LPB0181 16S ribosomal RNA gene, partial sequence                            | 4-Nov-17      | 4-Jan-18      | 1           | Acinetobacter indicus                 |                               | Acinetobacter indicus                 | 1375   | 0           | LPB0181    | genomic DNA |         | tidal flat                                                     | 1         | 1375     | FALSE   | ncbi_filtered   | 756892  |
| NZ_K530754_1782_3369       | 1341679 | NZ_K530754      |                                                                                                          |               |               |             |                                       |                               |                                       |        |             |            |             |         |                                                                |           |          |         |                 |         |

| seqname                     | tax_id  | accession       | description                                                                               | modified_date | download_date | version | num | source | keywords   | organism                         | length | ambig | count | strain     | mol_type    | isolate    | isolation_source                                                                                            | seq_start | seq_stop | is_type | collection    | species |
|-----------------------------|---------|-----------------|-------------------------------------------------------------------------------------------|---------------|---------------|---------|-----|--------|------------|----------------------------------|--------|-------|-------|------------|-------------|------------|-------------------------------------------------------------------------------------------------------------|-----------|----------|---------|---------------|---------|
| NZ_KV40945_4265435_4266889  | 859144  | NZ_KV40945      | Bacillus gothelii strain FIAT-2394 Scaffold1, whole genome shotgun sequence               | 12-Apr-17     | 4-Jan-18      | 1       |     |        | WGS,RefSeq | Bacillus gothelii                | 1555   | 0     |       | FIAT-2394  | genomic DNA |            | pharmaceutical production line                                                                              | 4265435   | 4266889  | TRUE    | ncbi_filtered | 859144  |
| KP192001_1_1430             | 861266  | KP192001        | Arthrobacter siccotolerans strain BGSLP23 16S ribosomal RNA gene, partial sequence        | 29-Mar-15     | 4-Jan-18      | 1       |     |        | RefSeq     | Pseudarthrobacter siccotolerans  | 1430   | 0     |       | BGSLP23    | genomic DNA |            | permafrost soil                                                                                             | 1         | 1430     | FALSE   | ncbi_filtered | 861266  |
| KP192025_1_1417             | 861266  | KP192025        | Arthrobacter siccotolerans strain BGSLP47 16S ribosomal RNA gene, partial sequence        | 15-Jul-15     | 4-Jan-18      | 1       |     |        | RefSeq     | Pseudarthrobacter siccotolerans  | 1417   | 0     |       | BGSLP47    | genomic DNA |            | permafrost soil                                                                                             | 1         | 1417     | FALSE   | ncbi_filtered | 861266  |
| KY218890_1_1391             | 861266  | KY218890        | Pseudarthrobacter siccotolerans strain IF75W-B38 16S ribosomal RNA gene, partial sequence | 27-Nov-16     | 4-Jan-18      | 1       |     |        | RefSeq     | Pseudarthrobacter siccotolerans  | 1391   | 0     |       | IF75W-B38  | genomic DNA |            |                                                                                                             | 1         | 1391     | FALSE   | ncbi_filtered | 861266  |
| KY753220_1_1424             | 861266  | KY753220        | Pseudarthrobacter siccotolerans strain MR-21 16S ribosomal RNA gene, partial sequence     | 19-Jun-17     | 4-Jan-18      | 1       |     |        | RefSeq     | Pseudarthrobacter siccotolerans  | 1424   | 0     |       | MR-21      | genomic DNA |            | soil                                                                                                        | 1         | 1424     | FALSE   | ncbi_filtered | 861266  |
| MGS75956_1_1487             | 861266  | MGS75956        | Pseudarthrobacter siccotolerans strain OX107 16S ribosomal RNA gene, partial sequence     | 2-Dec-17      | 4-Jan-18      | 1       |     |        | RefSeq     | Pseudarthrobacter siccotolerans  | 1487   | 0     |       | OX107      | genomic DNA |            |                                                                                                             | 1         | 1487     | FALSE   | ncbi_filtered | 861266  |
| KF930757_1_1341             | 862134  | KF930757        | Sphingomonas ginsenosidimutans partial 16S rRNA gene, isolate P9AR2-Sg2                   | 23-Sep-13     | 4-Jan-18      | 1       |     |        | RefSeq     | Sphingomonas ginsenosidimutans   | 1341   | 0     |       |            | genomic DNA | P9AR2-Sg2  | hospital tap water                                                                                          | 1         | 1341     | FALSE   | ncbi_filtered | 862134  |
| NR_117831_1_1439            | 862134  | NR_117831       | Sphingomonas ginsenosidimutans strain Gsoil 1429 16S ribosomal RNA gene, partial sequence | 3-Feb-15      | 4-Jan-18      | 1       |     |        | RefSeq     | Sphingomonas ginsenosidimutans   | 1439   | 0     |       | Gsoil 1429 | rRNA        |            | soil                                                                                                        | 1         | 1439     | TRUE    | ncbi_filtered | 862134  |
| NZ_NVND01000032_3932_5427   | 862134  | NZ_NVND01000032 | Sphingomonas ginsenosidimutans strain KACC 14949 contig23, whole genome shotgun sequence  | 29-Sep-17     | 4-Jan-18      | 1       |     |        | WGS,RefSeq | Sphingomonas ginsenosidimutans   | 1496   | 0     |       | KACC 14949 | genomic DNA |            | soil                                                                                                        | 3932      | 5427     | TRUE    | ncbi_filtered | 862134  |
| EUS49838_1_1434             | 863372  | EUS49838        | Herbaspirillum huttiense strain AU8965 16S ribosomal RNA gene, partial sequence           | 5-Aug-08      | 4-Jan-18      | 1       |     |        | RefSeq     | Herbaspirillum huttiense         | 1434   | 0     |       | AU8965     | genomic DNA |            |                                                                                                             | 1         | 1434     | FALSE   | ncbi_filtered | 863372  |
| JO559769_1_1470             | 863372  | JO559769        | Herbaspirillum huttiense strain R5-408 16S ribosomal RNA gene, partial sequence           | 23-Dec-15     | 4-Jan-18      | 1       |     |        | RefSeq     | Herbaspirillum huttiense         | 1470   | 0     |       | R5-408     | genomic DNA |            | plant tissue                                                                                                | 1         | 1470     | FALSE   | ncbi_filtered | 863372  |
| KC170010_1_1429             | 863372  | KC170010        | Herbaspirillum huttiense strain Alborz7 16S ribosomal RNA gene, partial sequence          | 17-Feb-13     | 4-Jan-18      | 1       |     |        | RefSeq     | Herbaspirillum huttiense         | 1429   | 0     |       | Alborz7    | genomic DNA |            | soil                                                                                                        | 1         | 1429     | FALSE   | ncbi_filtered | 863372  |
| KF515669_1_1431             | 863372  | KF515669        | Herbaspirillum huttiense strain L19 16S ribosomal RNA gene, partial sequence              | 9-Dec-13      | 4-Jan-18      | 1       |     |        | RefSeq     | Herbaspirillum huttiense         | 1431   | 0     |       | L19        | genomic DNA |            | huanglongbing pathogen-infected stems                                                                       | 1         | 1431     | FALSE   | ncbi_filtered | 863372  |
| KJ186943_1_1411             | 863372  | KJ186943        | Herbaspirillum huttiense strain C_G_AE-4 16S ribosomal RNA gene, partial sequence         | 9-Apr-14      | 4-Jan-18      | 1       |     |        | RefSeq     | Herbaspirillum huttiense         | 1411   | 0     |       | C_G_AE-4   | genomic DNA |            | gelled mass of Pectinately colony, sand-pit Cep, South Bohemia (48 degrees 56.374' N, 14 degrees 52.430' E) | 1         | 1411     | FALSE   | ncbi_filtered | 863372  |
| JX971556_1_1284             | 866566  | JX971556        | Devosia glacialis strain CH1-30 16S ribosomal RNA gene, partial sequence                  | 15-Dec-12     | 4-Jan-18      | 1       |     |        | RefSeq     | Devosia glacialis                | 1284   | 0     |       | CH1-30     | genomic DNA |            |                                                                                                             | 1         | 1284     | FALSE   | ncbi_filtered | 866566  |
| NR_117855_1_1474            | 866566  | NR_117855       | Devosia glacialis strain C14-44 16S ribosomal RNA gene, partial sequence                  | 3-Feb-15      | 4-Jan-18      | 1       |     |        | RefSeq     | Devosia glacialis                | 1474   | 0     |       | C14-44     | rRNA        |            | alpine glacier cryoconite                                                                                   | 1         | 1474     | TRUE    | ncbi_filtered | 866566  |
| KU341395_1_1415             | 869719  | KU341395        | Sphingomonas endophytica strain S51-17 16S ribosomal RNA gene, partial sequence           | 15-Jul-16     | 4-Jan-18      | 1       |     |        | RefSeq     | Sphingomonas endophytica         | 1415   | 0     |       | S51-17     | genomic DNA |            | freshwater sediment                                                                                         | 1         | 1415     | FALSE   | ncbi_filtered | 869719  |
| NR_117869_1_1412            | 869719  | NR_117869       | Sphingomonas endophytica strain YIM 65583 16S ribosomal RNA gene, partial sequence        | 3-Feb-15      | 4-Jan-18      | 1       |     |        | RefSeq     | Sphingomonas endophytica         | 1412   | 0     |       | YIM 65583  | rRNA        |            |                                                                                                             | 1         | 1412     | TRUE    | ncbi_filtered | 869719  |
| NZ_LDT081000042_202_1697    | 869719  | NZ_LDT081000042 | Sphingomonas endophytica strain NS334 contig_42, whole genome shotgun sequence            | 16-Apr-17     | 4-Jan-18      | 1       |     |        | WGS,RefSeq | Sphingomonas endophytica         | 1496   | 0     |       | NS334      | genomic DNA |            |                                                                                                             | 202       | 1697     | FALSE   | ncbi_filtered | 869719  |
| NR_117867_1_1372            | 871664  | NR_117867       | Blautia stercoris strain GAMB-1 16S ribosomal RNA gene, partial sequence                  | 3-Feb-15      | 4-Jan-18      | 1       |     |        | RefSeq     | Blautia stercoris                | 1372   | 0     |       | GAMB-1     | rRNA        |            | feces                                                                                                       | 1         | 1372     | TRUE    | ncbi_filtered | 871664  |
| NR_109014_1_1262            | 871665  | NR_109014       | Blautia faecis strain M25 16S ribosomal RNA gene, partial sequence                        | 3-Feb-15      | 4-Jan-18      | 1       |     |        | RefSeq     | Blautia faecis                   | 1262   | 1     |       | M25        | rRNA        |            | feces                                                                                                       | 1         | 1262     | TRUE    | ncbi_filtered | 871665  |
| MG912565_1_1308             | 882452  | MG912565        | Williamsia limnetica strain IEGM 1358 16S ribosomal RNA gene, partial sequence            | 12-Feb-18     | 14-Feb-18     | 1       |     |        | RefSeq     | Williamsia limnetica             | 1308   | 2     |       | IEGM 1358  | genomic DNA |            |                                                                                                             | 1         | 1308     | FALSE   | ncbi_filtered | 882452  |
| NR_117925_1_1460            | 882452  | NR_117925       | Williamsia limnetica strain L1505 16S ribosomal RNA gene, partial sequence                | 3-Feb-15      | 4-Jan-18      | 1       |     |        | RefSeq     | Williamsia limnetica             | 1460   | 0     |       | L1505      | rRNA        |            | lake sediment                                                                                               | 1         | 1460     | TRUE    | ncbi_filtered | 882452  |
| GQ900631_1_1480             | 884684  | GQ900631        | Mageeibacillus indolicus strain 0004-9 16S ribosomal RNA gene, partial sequence           | 13-Apr-17     | 4-Jan-18      | 1       |     |        | RefSeq     | Mageeibacillus indolicus         | 1480   | 2     |       | 0004-9     | genomic DNA |            | endometrial biopsy                                                                                          | 1         | 1480     | FALSE   | ncbi_filtered | 884684  |
| GQ900633_1_1480             | 884684  | GQ900633        | Mageeibacillus indolicus strain 0019-D 16S ribosomal RNA gene, partial sequence           | 13-Apr-17     | 4-Jan-18      | 1       |     |        | RefSeq     | Mageeibacillus indolicus         | 1480   | 3     |       | 0019-D     | genomic DNA |            | endometrial biopsy                                                                                          | 1         | 1480     | FALSE   | ncbi_filtered | 884684  |
| NC_013895_255524_257061     | 699246  | NC_013895       | Mageeibacillus indolicus UPI9-5, complete genome                                          | 3-Sep-17      | 4-Jan-18      | 2       |     |        | RefSeq     | Mageeibacillus indolicus UPI9-5  | 1538   | 0     |       | UPI9-5     | genomic DNA |            | biological product [EVO:02000043]                                                                           | 255524    | 257061   | FALSE   | ncbi_filtered | 884684  |
| KC203131_1_1333             | 908946  | KC203131        | Rhizobium subbaroonis strain W3 16S ribosomal RNA gene, partial sequence                  | 16-Jul-16     | 4-Jan-18      | 1       |     |        | RefSeq     | Rhizobium subbaroonis            | 1333   | 0     |       | W3         | genomic DNA |            | waste drilling fluid                                                                                        | 1         | 1333     | FALSE   | ncbi_filtered | 908946  |
| NR_108508_1_1385            | 908946  | NR_108508       | Rhizobium subbaroonis strain JCB5, whole genome shotgun sequence                          | 3-Feb-15      | 4-Jan-18      | 1       |     |        | RefSeq     | Rhizobium subbaroonis            | 1385   | 0     |       | JCB5       | rRNA        |            | sand                                                                                                        | 1         | 1385     | TRUE    | ncbi_filtered | 908946  |
| NZ_OBDQ01000060_387_1882    | 908946  | NZ_OBDQ01000060 | Rhizobium subbaroonis strain JCB5, whole genome shotgun sequence                          | 12-Oct-17     | 4-Jan-18      | 1       |     |        | WGS,RefSeq | Rhizobium subbaroonis            | 1496   | 0     |       | JCB5       | genomic DNA |            |                                                                                                             | 387       | 1882     | TRUE    | ncbi_filtered | 908946  |
| NZ_CP011125_8618258_8619821 | 927083  | NZ_CP011125     | Sandaracrus amyolyticus strain DSM 53668, complete genome                                 | 16-Apr-17     | 4-Jan-18      | 1       |     |        | RefSeq     | Sandaracrus amyolyticus          | 1564   | 0     |       | DSM 53668  | genomic DNA |            |                                                                                                             | 8618258   | 8619821  | TRUE    | ncbi_filtered | 927083  |
| NZ_CP011125_8624125_8625688 | 927083  | NZ_CP011125     | Sandaracrus amyolyticus strain DSM 53668, complete genome                                 | 16-Apr-17     | 4-Jan-18      | 1       |     |        | RefSeq     | Sandaracrus amyolyticus          | 1564   | 0     |       | DSM 53668  | genomic DNA |            |                                                                                                             | 8624125   | 8625688  | TRUE    | ncbi_filtered | 927083  |
| NR_109131_1_1435            | 930138  | NR_109131       | Allicoccus persicus strain A76 16S ribosomal RNA, partial sequence                        | 4-Dec-15      | 4-Jan-18      | 1       |     |        | RefSeq     | Allicoccus persicus              | 1435   | 0     |       | A76        | rRNA        |            | Aran-Bidgol hypersaline lake                                                                                | 1         | 1435     | TRUE    | ncbi_filtered | 930138  |
| NZ_F0CE01000030_1472        | 93059   | NZ_F0CE01000030 | Gemmobacter aquatilis strain DSM 3857, whole genome shotgun sequence                      | 29-Jul-17     | 4-Jan-18      | 1       |     |        | WGS,RefSeq | Gemmobacter aquatilis            | 1470   | 0     |       | DSM 3857   | genomic DNA |            |                                                                                                             | 3         | 1472     | TRUE    | ncbi_filtered | 93059   |
| NR_113037_1_1480            | 938278  | NR_113037       | Casaltella massiliensis strain 9400853 16S ribosomal RNA, partial sequence                | 2-Aug-16      | 4-Jan-18      | 1       |     |        | RefSeq     | Casaltella massiliensis          | 1480   | 0     |       | 9400853    | rRNA        |            |                                                                                                             | 1         | 1480     | TRUE    | ncbi_filtered | 938278  |
| NZ_H99795_1_1430            | 938278  | NZ_H99795       | Casaltella massiliensis strain 9400853, whole genome shotgun sequence                     | 17-Apr-17     | 4-Jan-18      | 1       |     |        | WGS,RefSeq | Casaltella massiliensis          | 1430   | 0     |       | 9400853    | genomic DNA |            |                                                                                                             | 1         | 1430     | TRUE    | ncbi_filtered | 938278  |
| KF007171_1_1390             | 938288  | KF007171        | Clostridiales bacterium 59 HS-16 16S ribosomal RNA gene, partial sequence                 | 28-May-15     | 4-Jan-18      | 1       |     |        | RefSeq     | Clostridiales bacterium 59 HS-16 | 1390   | 0     |       | 59 HS-16   | genomic DNA |            | vaginal swab                                                                                                | 1         | 1390     | TRUE    | ncbi_filtered | 938288  |
| KJ276669_1_1297             | 938288  | KJ276669        | Fenollaria massiliensis strain DNF0604 16S ribosomal RNA gene, partial sequence           | 26-Apr-16     | 4-Jan-18      | 1       |     |        | RefSeq     | Fenollaria massiliensis          | 1297   | 0     |       | DNF0604    | genomic DNA |            | vaginal fluid from subject with bacterial vaginosis                                                         | 1         | 1297     | TRUE    | ncbi_filtered | 938288  |
| NZ_HG326226_236649_238189   | 938288  | NZ_HG326226     | Fenollaria massiliensis strain 9401234, whole genome shotgun sequence                     | 17-Apr-17     | 4-Jan-18      | 1       |     |        | WGS,RefSeq | Fenollaria massiliensis          | 1541   | 0     |       | 9401234    | genomic DNA |            |                                                                                                             | 236649    | 238189   | TRUE    | ncbi_filtered | 938288  |
| NR_133036_1_1378            | 938293  | NR_133036       | Anaerococcus provencensis strain 9402080 16S ribosomal RNA, partial sequence              | 30-Aug-17     | 4-Jan-18      | 1       |     |        | RefSeq     | Anaerococcus provencensis        | 1378   | 1     |       | 9402080    | rRNA        |            |                                                                                                             | 1         | 1378     | TRUE    | ncbi_filtered | 938293  |
| NZ_HG003686_187744_189279   | 938293  | NZ_HG003686     | Anaerococcus provencensis strain 9402080, whole genome shotgun sequence                   | 22-Aug-17     | 4-Jan-18      | 1       |     |        | WGS,RefSeq | Anaerococcus provencensis        | 1536   | 0     |       | 9402080    | genomic DNA |            |                                                                                                             | 187744    | 189279   | TRUE    | ncbi_filtered | 938293  |
| NZ_HG003688_27300_28837     | 938293  | NZ_HG003688     | Anaerococcus provencensis strain 9402080, whole genome shotgun sequence                   | 22-Aug-17     | 4-Jan-18      | 1       |     |        | WGS,RefSeq | Anaerococcus provencensis        | 1536   | 0     |       | 9402080    | genomic DNA |            |                                                                                                             | 27300     | 28837    | TRUE    | ncbi_filtered | 938293  |
| HQ436498_1_1432             | 940133  | HQ436498        | Sphingomonas sp. enrichment culture clone 035U16 16S ribosomal RNA gene, partial sequence | 8-Jan-11      | 4-Jan-18      | 1       |     |        | DNV        | Sphingomonas limososedimicola    | 1432   | 0     |       |            | genomic DNA |            | fresh water                                                                                                 | 1         | 1432     | FALSE   | ncbi_filtered | 940133  |
| LN774349_1_1420             | 945844  | LN774349        | Massilia oculi partial 16S rRNA gene, isolate 0911T518R1                                  | 27-Feb-15     | 4-Jan-18      | 1       |     |        | RefSeq     | Massilia oculi                   | 1420   | 0     |       |            | genomic DNA | 0911T518R1 | air sample                                                                                                  | 1         | 1420     | FALSE   | ncbi_filtered | 945844  |
| NR_117180_1_1450            | 945844  | NR_117180       | Massilia oculi strain CCG 43427A 16S ribosomal RNA gene, partial sequence                 | 3-Feb-15      | 4-Jan-18      | 1       |     |        | RefSeq     | Massilia oculi                   | 1450   | 0     |       | CCG 43427A | rRNA        |            | clinical                                                                                                    | 1         | 1450     | TRUE    | ncbi_filtered | 945844  |
| KC311758_1_1400             | 979627  | KC311758        | Lachnoaerobaculum sp. 56-P3 16S ribosomal RNA gene, partial sequence                      | 28-May-15     | 4-Jan-18      | 1       |     |        | RefSeq     | Lachnoaerobaculum sp. 56-P3      | 1400   | 0     |       | 56-P3      | genomic DNA |            | vaginal swab                                                                                                | 1         | 1400     | TRUE    | ncbi_filtered | 979627  |
| NR_118086_1_1435            | 979627  | NR_118086       | Lachnoaerobaculum orale strain N1 16S ribosomal RNA gene, partial sequence                | 3-Feb-15      | 4-Jan-18      | 1       |     |        | RefSeq     | Lachnoaerobaculum orale          | 1435   | 0     |       | N1         | rRNA        |            | saliva                                                                                                      | 1         | 1435     | TRUE    | ncbi_filtered | 979627  |
| KJ784486_1_1469             | 1288484 | KJ784486        | Deinococcus wulumugiensis strain DSM 28115 16S ribosomal RNA gene, partial sequence       | 14-Apr-15     | 4-Jan-18      | 1       |     |        | RefSeq     | Deinococcus wulumugiensis R12    | 1469   | 1     |       | DSM 28115  | genomic DNA |            | radiation polluted soil                                                                                     | 1         | 1469     | TRUE    | ncbi_filtered | 980427  |
| NR_116670_1_1422            | 140343  | NR_116670       | Deinococcus wulumugiensis strain R13 16S ribosomal RNA gene, partial sequence             | 3-Feb-15      | 4-Jan-18      | 1       |     |        | RefSeq     | Deinococcus wulumugiensis R13    | 1422   | 0     |       | R13        | rRNA        |            | radiation polluted soil                                                                                     | 1         | 1422     | FALSE   | ncbi_filtered | 980427  |
| NZ_APCS01000185_1_1503      | 1288484 | NZ_APCS01000185 | Deinococcus wulumugiensis R12 contig189, whole genome shotgun sequence                    | 8-Apr-17      | 4-Jan-18      | 1       |     |        | WGS,RefSeq | Deinococcus wulumugiensis R12    | 1503   | 0     |       | R12        | genomic DNA |            | soil                                                                                                        | 1         | 1503     | TRUE    | ncbi_filtered | 98042   |

| seqname                        | tax_id  | accession       | description                                                                                        | modified_date | download_date | version | num_source                    | keywords   | organism                      | length | ambig_count | strain        | mol_type    | isolate                | isolation_source                           | seq_start | seq_stop | is_type | collection    | species |
|--------------------------------|---------|-----------------|----------------------------------------------------------------------------------------------------|---------------|---------------|---------|-------------------------------|------------|-------------------------------|--------|-------------|---------------|-------------|------------------------|--------------------------------------------|-----------|----------|---------|---------------|---------|
| NZ_LJK01000425_352_1902        | 1056807 | NZ_LJK01000425  | Morococcus cerebusus strain 379_NMEN 2994_6540_351774_2483_..._1500_ whole genome shotgun sequence | 10-Apr-17     | 4-Jan-18      | 1       | Morococcus cerebusus          | WGS,RefSeq | Morococcus cerebusus          | 1551   | 0           | 379_NMEN      | genomic DNA |                        |                                            | 352       | 1902     | FALSE   | ncbi_filtered | 1056807 |
| KF819793_1_1385                | 1056810 | KF819793        | Prolinoborus fasciulus strain MTA-24-1 16S ribosomal RNA gene, partial sequence                    | 23-Dec-13     | 4-Jan-18      | 1       | Prolinoborus fasciulus        | RefSeq     | Prolinoborus fasciulus        | 1385   | 0           | MTA-24-1      | genomic DNA |                        |                                            | 1         | 1385     | FALSE   | ncbi_filtered | 1056810 |
| KF848490_1_1371                | 1056810 | KF848490        | Prolinoborus fasciulus strain MB-22 16S ribosomal RNA gene, partial sequence                       | 23-Dec-13     | 4-Jan-18      | 1       | Prolinoborus fasciulus        | RefSeq     | Prolinoborus fasciulus        | 1371   | 0           | MB-22         | genomic DNA |                        |                                            | 1         | 1371     | FALSE   | ncbi_filtered | 1056810 |
| KR085813_1_1506                | 1056810 | KR085813        | Prolinoborus fasciulus strain IHB8 9208 16S ribosomal RNA gene, partial sequence                   | 11-Aug-15     | 4-Jan-18      | 1       | Prolinoborus fasciulus        | RefSeq     | Prolinoborus fasciulus        | 1506   | 0           | IHB8 9208     | genomic DNA | Chandra Tai Lake Water |                                            | 1         | 1506     | FALSE   | ncbi_filtered | 1056810 |
| KR811291_1_1312                | 1056810 | KR811291        | Prolinoborus fasciulus strain EA3 16S ribosomal RNA gene, partial sequence                         | 5-Jan-16      | 4-Jan-18      | 1       | Prolinoborus fasciulus        | RefSeq     | Prolinoborus fasciulus        | 1312   | 0           | EA3           | genomic DNA |                        |                                            | 1         | 1312     | FALSE   | ncbi_filtered | 1056810 |
| KY425787_1_1499                | 1056810 | KY425787        | Prolinoborus fasciulus strain MA26 16S ribosomal RNA gene, partial sequence                        | 31-Jan-17     | 4-Jan-18      | 1       | Prolinoborus fasciulus        | RefSeq     | Prolinoborus fasciulus        | 1499   | 0           | MA26          | genomic DNA |                        |                                            | 1         | 1499     | FALSE   | ncbi_filtered | 1056810 |
| LN774192_1_1422                | 1064516 | LN774192        | Novherbaspirillum canariense partial 16S rRNA gene, isolate 0911ARD6F3                             | 27-Feb-15     | 4-Jan-18      | 1       | Novherbaspirillum canariense  | RefSeq     | Novherbaspirillum canariense  | 1422   | 0           | 0911ARD6F3    | genomic DNA | 0911ARD6F3             | air sample                                 | 1         | 1422     | FALSE   | ncbi_filtered | 1064516 |
| NR_118039_1_1528               | 1064516 | NR_118039       | Novherbaspirillum canariense strain SUEM03 16S ribosomal RNA gene, partial sequence                | 3-Feb-15      | 4-Jan-18      | 1       | Novherbaspirillum canariense  | RefSeq     | Novherbaspirillum canariense  | 1526   | 4           | SUEM03        | rRNA        |                        |                                            | 1         | 1526     | TRUE    | ncbi_filtered | 1064516 |
| NR_109453_1_1408               | 1069693 | NR_109453       | Janibacter alkaliphilus strain SC510 10480 16S ribosomal RNA gene, partial sequence                | 16-Jun-15     | 4-Jan-18      | 1       | Janibacter alkaliphilus       | RefSeq     | Janibacter alkaliphilus       | 1408   | 0           | SC510 10480   | rRNA        |                        |                                            | 1         | 1408     | TRUE    | ncbi_filtered | 1069693 |
| JF295054_1_1344                | 1076549 | JF295054        | Pantoea rodasi strain LMG 26274 16S ribosomal RNA gene, complete sequence                          | 11-Jul-12     | 4-Jan-18      | 1       | Pantoea rodasi                | RefSeq     | Pantoea rodasi                | 1344   | 0           | LMG 26274     | genomic DNA |                        |                                            | 1         | 1344     | FALSE   | ncbi_filtered | 1076549 |
| JX113243_1_1431                | 1076549 | JX113243        | Pantoea rodasi strain Y36 16S ribosomal RNA gene, partial sequence                                 | 31-Jul-12     | 4-Jan-18      | 1       | Pantoea rodasi                | RefSeq     | Pantoea rodasi                | 1431   | 0           | Y36           | genomic DNA |                        | fresh tobacco leaf                         | 1         | 1431     | FALSE   | ncbi_filtered | 1076549 |
| KC934807_1_1384                | 1076549 | KC934807        | Pantoea rodasi strain H11 16S ribosomal RNA gene, partial sequence                                 | 6-Jan-16      | 4-Jan-18      | 1       | Pantoea rodasi                | RefSeq     | Pantoea rodasi                | 1401   | 0           | H11           | genomic DNA |                        | purple siltstone                           | 1         | 1401     | FALSE   | ncbi_filtered | 1076549 |
| MGS19831_1_1340                | 1076549 | MGS19831        | Pantoea rodasi 16S ribosomal RNA gene, partial sequence                                            | 21-Nov-17     | 4-Jan-18      | 1       | Pantoea rodasi                | RefSeq     | Pantoea rodasi                | 1384   | 0           | S1536         | genomic DNA |                        | soil                                       | 1         | 1384     | FALSE   | ncbi_filtered | 1076549 |
| NR_118120_1_1344               | 1076549 | NR_118120       | Pantoea rodasi strain LMG 26273 16S ribosomal RNA, partial sequence                                | 24-Oct-17     | 4-Jan-18      | 1       | Pantoea rodasi                | RefSeq     | Pantoea rodasi                | 1344   | 1           | LMG 26273     | rRNA        |                        |                                            | 1         | 1344     | TRUE    | ncbi_filtered | 1076549 |
| JF506643_1_1364                | 1078480 | JF506643        | Haemophilus sputorum strain CCG 26672 16S ribosomal RNA gene, partial sequence                     | 27-Mar-12     | 4-Jan-18      | 1       | Haemophilus sputorum          | RefSeq     | Haemophilus sputorum          | 1364   | 0           | CCG 26672     | genomic DNA |                        |                                            | 1         | 1364     | FALSE   | ncbi_filtered | 1078480 |
| JF506647_1_1364                | 1078480 | JF506647        | Haemophilus sputorum strain HK 2156 16S ribosomal RNA gene, partial sequence                       | 27-Mar-12     | 4-Jan-18      | 1       | Haemophilus sputorum          | RefSeq     | Haemophilus sputorum          | 1364   | 1           | HK 2156       | genomic DNA |                        |                                            | 1         | 1364     | FALSE   | ncbi_filtered | 1078480 |
| JF506648_1_1364                | 1078480 | JF506648        | Haemophilus sputorum strain PN188 16S ribosomal RNA gene, partial sequence                         | 27-Mar-12     | 4-Jan-18      | 1       | Haemophilus sputorum          | RefSeq     | Haemophilus sputorum          | 1364   | 1           | PN188         | genomic DNA |                        |                                            | 1         | 1364     | FALSE   | ncbi_filtered | 1078480 |
| JF506649_1_1364                | 1078480 | JF506649        | Haemophilus sputorum strain PN198 16S ribosomal RNA gene, partial sequence                         | 27-Mar-12     | 4-Jan-18      | 1       | Haemophilus sputorum          | RefSeq     | Haemophilus sputorum          | 1364   | 1           | PN198         | genomic DNA |                        |                                            | 1         | 1364     | FALSE   | ncbi_filtered | 1078480 |
| NZ_AFNK01000005_43_1590        | 1035839 | NZ_AFNK01000005 | Haemophilus sputorum CCG13788 contig0008, whole genome shotgun sequence                            | 7-Apr-17      | 4-Jan-18      | 1       | Haemophilus sputorum CCG13788 | WGS,RefSeq | Haemophilus sputorum CCG13788 | 1548   | 0           | CCG13788      | genomic DNA |                        |                                            | 43        | 1590     | TRUE    | ncbi_filtered | 1078480 |
| NR_125455_1_1440               | 1082276 | NR_125455       | Hydrogenispora ethanolica strain LX-8 16S ribosomal RNA gene, partial sequence                     | 3-Feb-15      | 4-Jan-18      | 1       | Hydrogenispora ethanolica     | RefSeq     | Hydrogenispora ethanolica     | 1443   | 0           | LX-8          | rRNA        |                        | anaerobic sludge                           | 1         | 1443     | TRUE    | ncbi_filtered | 1082276 |
| NR_133854_1_1393               | 1086393 | NR_133854       | Sediminibacterium goheungense strain HME7863 16S ribosomal RNA, partial sequence                   | 4-Dec-15      | 4-Jan-18      | 1       | Sediminibacterium goheungense | RefSeq     | Sediminibacterium goheungense | 1390   | 0           | HME7863       | rRNA        |                        | reservoir                                  | 1         | 1390     | TRUE    | ncbi_filtered | 1086393 |
| HG974551_1_1409                | 1094342 | HG974551        | Alcanivorax xenomutans partial 16S rRNA gene, strain JC261                                         | 4-Feb-16      | 4-Jan-18      | 1       | Alcanivorax xenomutans        | RefSeq     | Alcanivorax xenomutans        | 1409   | 0           | JC261         | genomic DNA |                        | Sediment sample                            | 1         | 1409     | FALSE   | ncbi_filtered | 1094342 |
| L7673799_1_1356                | 1094342 | L7673799        | Alcanivorax xenomutans partial 16S rRNA gene, strain ZSS1.1                                        | 19-Jan-17     | 4-Jan-18      | 1       | Alcanivorax xenomutans        | RefSeq     | Alcanivorax xenomutans        | 1356   | 0           | ZSS1.1        | genomic DNA |                        | deep sea sediment                          | 1         | 1356     | FALSE   | ncbi_filtered | 1094342 |
| MF928270_1_1332                | 1094342 | MF928270        | Alcanivorax xenomutans strain CP07 16S ribosomal RNA gene, partial sequence                        | 16-Sep-17     | 4-Jan-18      | 1       | Alcanivorax xenomutans        | RefSeq     | Alcanivorax xenomutans        | 1332   | 0           | CP07          | genomic DNA |                        | marine sediment                            | 1         | 1332     | FALSE   | ncbi_filtered | 1094342 |
| NR_133958_1_1416               | 1094342 | NR_133958       | Alcanivorax xenomutans strain JC109 16S ribosomal RNA, partial sequence                            | 14-Dec-15     | 4-Jan-18      | 1       | Alcanivorax xenomutans        | RefSeq     | Alcanivorax xenomutans        | 1416   | 0           | JC109         | rRNA        |                        | sediment sample                            | 1         | 1416     | TRUE    | ncbi_filtered | 1094342 |
| NZ_CP012331_3879469_3881014    | 1094342 | NZ_CP012331     | Alcanivorax xenomutans strain P40, complete genome                                                 | 30-Mar-17     | 4-Jan-18      | 1       | Alcanivorax xenomutans        | RefSeq     | Alcanivorax xenomutans        | 1546   | 0           | P40           | genomic DNA |                        | deep seawater                              | 3879469   | 3881014  | FALSE   | ncbi_filtered | 1094342 |
| KY753227_1_1418                | 1105144 | KY753227        | Promicromonospora iranensis strain MR-28 16S ribosomal RNA gene, partial sequence                  | 19-Jun-17     | 4-Jan-18      | 1       | Promicromonospora iranensis   | RefSeq     | Promicromonospora iranensis   | 1418   | 0           | MR-28         | genomic DNA |                        | soil                                       | 1         | 1418     | FALSE   | ncbi_filtered | 1105144 |
| MF101072_1_1380                | 1105144 | MF101072        | Promicromonospora iranensis strain DIG-5 16S ribosomal RNA gene, partial sequence                  | 19-Jun-17     | 4-Jan-18      | 1       | Promicromonospora iranensis   | RefSeq     | Promicromonospora iranensis   | 1380   | 0           | DIG-5         | genomic DNA |                        |                                            | 1         | 1380     | FALSE   | ncbi_filtered | 1105144 |
| NR_109446_1_1514               | 1105144 | NR_109446       | Promicromonospora iranensis strain UTMCO0792 16S ribosomal RNA, partial sequence                   | 14-Dec-15     | 4-Jan-18      | 1       | Promicromonospora iranensis   | RefSeq     | Promicromonospora iranensis   | 1514   | 0           | UTMCO0792     | rRNA        |                        | soil                                       | 1         | 1514     | TRUE    | ncbi_filtered | 1105144 |
| JN104030_1_1463                | 1107316 | JN104030        | Neisseria oralis strain 8261 16S ribosomal RNA gene, partial sequence                              | 15-Apr-13     | 4-Jan-18      | 1       | Neisseria oralis              | RefSeq     | Neisseria oralis              | 1463   | 0           | 8261          | genomic DNA |                        | blood                                      | 1         | 1463     | FALSE   | ncbi_filtered | 1107316 |
| JN986581_1_1473                | 1107316 | JN986581        | Neisseria oralis strain 11-26358 16S ribosomal RNA gene, partial sequence                          | 31-Jul-12     | 4-Jan-18      | 1       | Neisseria oralis              | RefSeq     | Neisseria oralis              | 1463   | 0           | 11-26358      | genomic DNA |                        | urine                                      | 1         | 1463     | FALSE   | ncbi_filtered | 1107316 |
| KF733684_1_1462                | 1107316 | KF733684        | Neisseria oralis strain CHDC B360 16S ribosomal RNA gene, partial sequence                         | 14-Jan-14     | 4-Jan-18      | 1       | Neisseria oralis              | RefSeq     | Neisseria oralis              | 1462   | 0           | CHDC B360     | genomic DNA |                        | oral cavity                                | 1         | 1462     | FALSE   | ncbi_filtered | 1107316 |
| AB679110_1_1514                | 1110546 | AB679110        | Veillonella tobetsuensis gene for 16S ribosomal RNA, partial sequence                              | 13-Apr-13     | 4-Jan-18      | 1       | Veillonella tobetsuensis      | RefSeq     | Veillonella tobetsuensis      | 1514   | 2           | B4            | genomic DNA |                        |                                            | 1         | 1514     | FALSE   | ncbi_filtered | 1110546 |
| AB679112_1_1519                | 1110546 | AB679112        | Veillonella tobetsuensis gene for 16S ribosomal RNA, partial sequence                              | 13-Apr-13     | 4-Jan-18      | 1       | Veillonella tobetsuensis      | RefSeq     | Veillonella tobetsuensis      | 1519   | 0           | Y6            | genomic DNA |                        |                                            | 1         | 1519     | FALSE   | ncbi_filtered | 1110546 |
| NR_113570_1_1520               | 1110546 | NR_113570       | Veillonella tobetsuensis strain JCM 17976 16S ribosomal RNA gene, partial sequence                 | 3-Feb-15      | 4-Jan-18      | 1       | Veillonella tobetsuensis      | RefSeq     | Veillonella tobetsuensis      | 1520   | 0           | JCM 17976     | rRNA        |                        |                                            | 1         | 1520     | TRUE    | ncbi_filtered | 1110546 |
| PPDF01000008_1045_2613         | 1110546 | PPDF01000008    | Veillonella tobetsuensis strain YG Contig_8_len_558190, whole genome shotgun sequence              | 27-Feb-18     | 2-Mar-18      | 1       | Veillonella tobetsuensis      | WGS        | Veillonella tobetsuensis      | 1569   | 0           | Y6            | genomic DNA |                        |                                            | 1045      | 2613     | FALSE   | ncbi_filtered | 1110546 |
| NZ_KQ954244_1668881_1670370    | 1117702 | NZ_KQ954244     | Novosphingobium fuchskuhense strain FNE08-7 PRINA299317_001, whole genome shotgun sequence         | 11-Apr-17     | 4-Jan-18      | 1       | Novosphingobium fuchskuhense  | WGS,RefSeq | Novosphingobium fuchskuhense  | 1490   | 0           | FNE08-7       | genomic DNA |                        | freshwater                                 | 1668881   | 1670370  | TRUE    | ncbi_filtered | 1117702 |
| NR_108875_1_1535               | 1118202 | NR_108875       | Cruoriocaptor ignavus strain IMMB1 L-12475 16S ribosomal RNA gene, partial sequence                | 3-Feb-15      | 4-Jan-18      | 1       | Cruoriocaptor ignavus         | RefSeq     | Cruoriocaptor ignavus         | 1535   | 0           | IMMB1 L-12475 | rRNA        |                        | blood culture of a patient with bacteremia | 1         | 1535     | TRUE    | ncbi_filtered | 1118202 |
| HE616166_1_1402                | 1122261 | HE616166        | Phreatobacter oligotrophus partial 16S rRNA gene, strain P9-25                                     | 23-Dec-15     | 4-Jan-18      | 1       | Phreatobacter oligotrophus    | RefSeq     | Phreatobacter oligotrophus    | 1402   | 0           |               | genomic DNA |                        | ultra pure water                           | 1         | 1402     | FALSE   | ncbi_filtered | 1122261 |
| KT345641_1_1385                | 1122261 | KT345641        | Phreatobacter oligotrophus strain U274 16S ribosomal RNA gene, partial sequence                    | 10-Nov-15     | 4-Jan-18      | 1       | Phreatobacter oligotrophus    | RefSeq     | Phreatobacter oligotrophus    | 1385   | 0           | U274          | genomic DNA |                        | hot spring                                 | 1         | 1385     | FALSE   | ncbi_filtered | 1122261 |
| JO690275_1_1425                | 1123352 | JO690275        | Tepidimicrobium xylanilyticum strain CS-3-1 16S ribosomal RNA gene, partial sequence               | 14-Apr-12     | 4-Jan-18      | 1       | Tepidimicrobium xylanilyticum | RefSeq     | Tepidimicrobium xylanilyticum | 1425   | 0           | CS-3-1        | genomic DNA |                        |                                            | 1         | 1425     | FALSE   | ncbi_filtered | 1123352 |
| LN881574_1_1426                | 1123352 | LN881574        | Tepidimicrobium xylanilyticum partial 16S rRNA gene, isolate GRC4                                  | 24-Sep-15     | 4-Jan-18      | 1       | Tepidimicrobium xylanilyticum | RefSeq     | Tepidimicrobium xylanilyticum | 1426   | 0           |               | genomic DNA | GRC4                   | biogas plant                               | 1         | 1426     | FALSE   | ncbi_filtered | 1123352 |
| NR_116042_1_1528               | 1123352 | NR_116042       | Tepidimicrobium xylanilyticum strain PML14 16S ribosomal RNA gene, partial sequence                | 3-Feb-15      | 4-Jan-18      | 1       | Tepidimicrobium xylanilyticum | RefSeq     | Tepidimicrobium xylanilyticum | 1528   | 0           | PML14         | rRNA        |                        |                                            | 1         | 1528     | TRUE    | ncbi_filtered | 1123352 |
| MG456804_1_1405                | 1131567 | MG456804        | Umbidbacterium squillum strain IMCC34688 16S ribosomal RNA gene, partial sequence                  | 13-Nov-17     | 4-Jan-18      | 1       | Umbidbacterium squillum       | RefSeq     | Umbidbacterium squillum       | 1405   | 0           | IMCC34688     | genomic DNA |                        |                                            | 1         | 1405     | FALSE   | ncbi_filtered | 1131567 |
| NR_134224_1_1525               | 1131567 | NR_134224       | Umbidbacterium squillum strain CMJ-15 16S ribosomal RNA, partial sequence                          | 14-Dec-15     | 4-Jan-18      | 1       | Umbidbacterium squillum       | RefSeq     | Umbidbacterium squillum       | 1525   | 0           | CMJ-15        | rRNA        |                        | fresh water                                | 1         | 1525     | TRUE    | ncbi_filtered | 1131567 |
| NC_018106_231636_233189        | 1191061 | NC_018106       | Klebsiella michiganensis E718, complete genome                                                     | 21-Feb-17     | 4-Jan-18      | 1       | Klebsiella michiganensis E718 | RefSeq     | Klebsiella michiganensis E718 | 1554   | 0           | E718          | genomic DNA |                        |                                            | 231636    | 233189   | FALSE   | ncbi_filtered | 1134887 |
| NZ_CP008841_1240274_1241827    | 1134687 | NZ_CP008841     | Klebsiella michiganensis strain M1, complete genome                                                | 21-Feb-17     | 4-Jan-18      | 1       | Klebsiella michiganensis      | RefSeq     | Klebsiella michiganensis      | 1554   | 0           | M1            | genomic DNA |                        |                                            | 240274    | 1241827  | FALSE   | ncbi_filtered | 1134687 |
| NZ_LWU01000001_1755483_1757033 | 1134687 | NZ_LWU01000001  | Klebsiella michiganensis strain M5a1 scaffold01, whole genome shotgun sequence                     | 21-Feb-17     | 4-Jan-18      | 1       | Klebsiella michiganensis      | WGS,RefSeq | Klebsiella michiganensis      | 1551   | 0           | M5a1          | genomic DNA |                        | 2-3 bioautotrophic fermentation            | 1755483   | 1757033  | FALSE   | ncbi_filtered | 1134687 |
| KU258217_1_1414                | 1137991 | KU258217        | Geodermatophilus siccatus strain AL20 16S ribosomal RNA gene, partial sequence                     | 12-Mar-16     | 4-Jan-18      | 1       | Geodermatophilus siccatus     | RefSeq     | Geodermatophilus siccatus     | 1434   | 0           | AL20          | genomic DNA |                        | lithic environment                         | 1         | 1434     | FALSE   | ncbi_filtered | 1137991 |
| NZ_FNHE01000033_323_1854       | 1137991 | NZ_FNHE01000033 | Geodermatophilus siccatus strain DSM 45419, whole genome shotgun sequence                          | 29-Jul-17     | 4-Jan-18      | 1       | Geodermatophilus siccatus     |            |                               |        |             |               |             |                        |                                            |           |          |         |               |         |

| seqname                     | tax_id  | accession       | description                                                                                | modified_date | download_date | version | num_source                                     | keywords                      | organism                                       | length | ambig_count | strain             | mol_type    | isolate                                                  | isolation_source | seq_start | seq_stop | is_type | collection    | species |
|-----------------------------|---------|-----------------|--------------------------------------------------------------------------------------------|---------------|---------------|---------|------------------------------------------------|-------------------------------|------------------------------------------------|--------|-------------|--------------------|-------------|----------------------------------------------------------|------------------|-----------|----------|---------|---------------|---------|
| AB910742_1_1467             | 213810  | AB910742        | Ruminococcus champanellensis gene for 16S ribosomal RNA, partial sequence                  | 21-Feb-14     | 4-Jan-18      | 1       | Ruminococcus champanellensis 18P13 = JCM 17042 |                               | Ruminococcus champanellensis 18P13 = JCM 17042 | 1467   | 0           | JCM 17042          | genomic DNA |                                                          |                  | 1         | 1467     | TRUE    | ncbi_filtered | 1161942 |
| NC_021039_6914_67422        | 213810  | NC_021039       | Ruminococcus champanellensis type strain 18P13T draft genome                               | 7-Apr-17      | 4-Jan-18      | 1       | Ruminococcus champanellensis 18P13 = JCM 17042 | RefSeq                        | Ruminococcus champanellensis 18P13 = JCM 17042 | 1509   | 0           | type strain: 18P13 | genomic DNA |                                                          |                  | 6914      | 67422    | TRUE    | ncbi_filtered | 1161942 |
| NR_114889_1_1368            | 213810  | NR_114889       | Ruminococcus champanellensis strain 18P13 16S ribosomal RNA gene, partial sequence         | 3-Feb-15      | 4-Jan-18      | 1       | Ruminococcus champanellensis 18P13 = JCM 17042 | RefSeq                        | Ruminococcus champanellensis 18P13 = JCM 17042 | 1368   | 0           | 18P13              | rRNA        | feces                                                    |                  | 1         | 1368     | TRUE    | ncbi_filtered | 1161942 |
| NZ_BBEP01000044_1349_4856   | 213810  | NZ_BBEP01000044 | Ruminococcus champanellensis 18P13 = JCM 17042, whole genome shotgun sequence              | 11-Apr-17     | 4-Jan-18      | 1       | Ruminococcus champanellensis 18P13 = JCM 17042 | WGS,RefSeq,STANDARD_DRAFT     | Ruminococcus champanellensis 18P13 = JCM 17042 | 1508   | 0           | JCM 17042          | genomic DNA |                                                          |                  | 3349      | 4856     | TRUE    | ncbi_filtered | 1161942 |
| JQ087390_1_1506             | 1162717 | JQ087390        | Streptobacillus hongkongensis strain HKU34 16S ribosomal RNA gene, complete sequence       | 16-Nov-15     | 4-Jan-18      | 2       | Streptobacillus hongkongensis                  |                               | Streptobacillus hongkongensis                  | 1506   | 0           | HKU34              | genomic DNA |                                                          |                  | 1         | 1506     | FALSE   | ncbi_filtered | 1162717 |
| NR_126239_1_1505            | 1162717 | NR_126239       | Streptobacillus hongkongensis strain HKU33 16S ribosomal RNA, partial sequence             | 24-Oct-17     | 4-Jan-18      | 1       | Streptobacillus hongkongensis                  | RefSeq                        | Streptobacillus hongkongensis                  | 1505   | 1           | HKU33              | rRNA        |                                                          |                  | 1         | 1505     | TRUE    | ncbi_filtered | 1162717 |
| NZ_LHY01000113_3213_4737    | 1162717 | NZ_LHY01000113  | DSM26322_52ZCLC_contig_52, whole genome shotgun sequence                                   | 11-Apr-17     | 4-Jan-18      | 1       | Streptobacillus hongkongensis                  | WGS,RefSeq                    | Streptobacillus hongkongensis                  | 1525   | 0           | DSM 26322          | genomic DNA | abscess                                                  |                  | 3213      | 4737     | TRUE    | ncbi_filtered | 1162717 |
| NR_133777_1_1436            | 1165852 | NR_133777       | Melaminivora alkalimicrophila strain CY1 16S ribosomal RNA, partial sequence               | 4-Dec-15      | 4-Jan-18      | 1       | Melaminivora alkalimicrophila                  | RefSeq                        | Melaminivora alkalimicrophila                  | 1436   | 0           | CY1                | rRNA        | wastewater                                               |                  | 1         | 1436     | TRUE    | ncbi_filtered | 1165852 |
| NZ_ALEE01000063_234_1769    | 1165852 | NZ_ALEE01000063 | Melaminivora alkalimicrophila strain CY1 1000063, whole genome shotgun sequence            | 7-Apr-17      | 4-Jan-18      | 1       | Melaminivora alkalimicrophila                  | WGS,RefSeq                    | Melaminivora alkalimicrophila                  | 1536   | 0           | CY1                | genomic DNA | melamine production wastewater                           |                  | 234       | 1769     | TRUE    | ncbi_filtered | 1165852 |
| KJ873895_1_1401             | 1166948 | KJ873895        | Halomonas xinjiangensis strain AX4 16S ribosomal RNA gene, partial sequence                | 7-Sep-14      | 4-Jan-18      | 1       | Halomonas xinjiangensis                        |                               | Halomonas xinjiangensis                        | 1401   | 0           | AX4                | genomic DNA | soil                                                     |                  | 1         | 1401     | FALSE   | ncbi_filtered | 1166948 |
| KJ873896_1_1414             | 1166948 | KJ873896        | Halomonas xinjiangensis strain AX5 16S ribosomal RNA gene, partial sequence                | 7-Sep-14      | 4-Jan-18      | 1       | Halomonas xinjiangensis                        |                               | Halomonas xinjiangensis                        | 1414   | 0           | AX5                | genomic DNA | soil                                                     |                  | 1         | 1414     | FALSE   | ncbi_filtered | 1166948 |
| KJ873901_1_1417             | 1166948 | KJ873901        | Halomonas xinjiangensis strain AX10 16S ribosomal RNA gene, partial sequence               | 7-Sep-14      | 4-Jan-18      | 1       | Halomonas xinjiangensis                        |                               | Halomonas xinjiangensis                        | 1417   | 0           | AX10               | genomic DNA | soil                                                     |                  | 1         | 1417     | FALSE   | ncbi_filtered | 1166948 |
| HM801866_1_1390             | 875454  | HM801866        | Peptoniphilus sp. 1-13 16S ribosomal RNA gene, partial sequence                            | 2-Jun-11      | 4-Jan-18      | 1       | Peptoniphilus rhinitidis 1-13                  |                               | Peptoniphilus rhinitidis 1-13                  | 1390   | 0           | 13-Jan             | genomic DNA |                                                          |                  | 1         | 1390     | TRUE    | ncbi_filtered | 1175452 |
| NZ_BAEW01000035_9_1538      | 875454  | NZ_BAEW01000035 | Peptoniphilus rhinitidis 1-13, whole genome shotgun sequence                               | 7-Apr-17      | 4-Jan-18      | 1       | Peptoniphilus rhinitidis 1-13                  | WGS,RefSeq,HIGH_QUALITY_DRAFT | Peptoniphilus rhinitidis 1-13                  | 1530   | 0           | 13-Jan             | genomic DNA |                                                          |                  | 9         | 1538     | TRUE    | ncbi_filtered | 1175452 |
| KY058318_1_1371             | 1176257 | KY058318        | Pseudomonas zhaozhongensis strain HEX57 16S ribosomal RNA gene, partial sequence           | 1-Feb-18      | 14-Feb-18     | 1       | Pseudomonas zhaozhongensis                     |                               | Pseudomonas zhaozhongensis                     | 1371   | 0           | HEX57              | genomic DNA | marine, environment                                      |                  | 1         | 1371     | FALSE   | ncbi_filtered | 1176257 |
| MF928125_1_1320             | 1176257 | MF928125        | Pseudomonas zhaozhongensis strain BX02 16S ribosomal RNA gene, partial sequence            | 16-Sep-17     | 4-Jan-18      | 1       | Pseudomonas zhaozhongensis                     |                               | Pseudomonas zhaozhongensis                     | 1320   | 0           | BX02               | genomic DNA | marine sediment                                          |                  | 1         | 1320     | FALSE   | ncbi_filtered | 1176257 |
| NR_134795_1_14025           | 1176257 | NR_134795       | Pseudomonas zhaozhongensis strain NEAU-ST5-21 16S ribosomal RNA, partial sequence          | 15-Jan-16     | 4-Jan-18      | 1       | Pseudomonas zhaozhongensis                     | RefSeq                        | Pseudomonas zhaozhongensis                     | 1403   | 0           | NEAU-ST5-21        | rRNA        | saline-alkaline soils                                    |                  | 1         | 1403     | TRUE    | ncbi_filtered | 1176257 |
| NR_133862_1_1436            | 1176646 | NR_133862       | Sphingomonas daechungensis strain CH15-11 16S ribosomal RNA, partial sequence              | 4-Dec-15      | 4-Jan-18      | 1       | Sphingomonas daechungensis                     | RefSeq                        | Sphingomonas daechungensis                     | 1436   | 0           | CH15-11            | rRNA        |                                                          |                  | 1         | 1436     | TRUE    | ncbi_filtered | 1176646 |
| CP023863_1753390_1754923    | 1177574 | CP023863        | Prevotella jejunii strain CD3.33 chromosome I, complete sequence                           | 3-Jan-18      | 4-Jan-18      | 1       | Prevotella jejunii                             |                               | Prevotella jejunii                             | 1534   | 0           | CD3.33             | genomic DNA | biopsy of small intestine from child with celiac disease |                  | 1753390   | 1754923  | FALSE   | ncbi_filtered | 1177574 |
| CP023863_1949125_1950658    | 1177574 | CP023863        | Prevotella jejunii strain CD3.33 chromosome I, complete sequence                           | 3-Jan-18      | 4-Jan-18      | 1       | Prevotella jejunii                             |                               | Prevotella jejunii                             | 1534   | 0           | CD3.33             | genomic DNA | biopsy of small intestine from child with celiac disease |                  | 1949125   | 1950658  | FALSE   | ncbi_filtered | 1177574 |
| CP023863_344322_345855      | 1177574 | CP023863        | Prevotella jejunii strain CD3.33 chromosome I, complete sequence                           | 3-Jan-18      | 4-Jan-18      | 1       | Prevotella jejunii                             |                               | Prevotella jejunii                             | 1534   | 0           | CD3.33             | genomic DNA | biopsy of small intestine from child with celiac disease |                  | 344322    | 345855   | FALSE   | ncbi_filtered | 1177574 |
| CP023864_1569728_1571264    | 1177574 | CP023864        | Prevotella jejunii strain CD3.33 chromosome II, complete sequence                          | 3-Jan-18      | 4-Jan-18      | 1       | Prevotella jejunii                             |                               | Prevotella jejunii                             | 1537   | 0           | CD3.33             | genomic DNA | biopsy of small intestine from child with celiac disease |                  | 1569728   | 1571264  | FALSE   | ncbi_filtered | 1177574 |
| JQ780833_1_1291             | 1177728 | JQ780833        | Varibaculum anthropi strain CCUG 45114 16S ribosomal RNA gene, partial sequence            | 18-Apr-17     | 4-Jan-18      | 1       | Varibaculum anthropi                           |                               | Varibaculum anthropi                           | 1291   | 0           | CCUG 45114         | genomic DNA | breast fluid                                             |                  | 1         | 1291     | FALSE   | ncbi_filtered | 1177728 |
| NR_146831_1_1329            | 1177728 | NR_146831       | Varibaculum anthropi strain CCUG 31793 16S ribosomal RNA, partial sequence                 | 20-Apr-17     | 4-Jan-18      | 1       | Varibaculum anthropi                           | RefSeq                        | Varibaculum anthropi                           | 1329   | 0           | CCUG 31793         | rRNA        | urine                                                    |                  | 1         | 1329     | TRUE    | ncbi_filtered | 1177728 |
| NR_149195_1_1429            | 1178516 | NR_149195       | Spirosoma montaniterrae strain DY10 16S ribosomal RNA, partial sequence                    | 7-Sep-17      | 4-Jan-18      | 1       | Spirosoma montaniterrae                        | RefSeq                        | Spirosoma montaniterrae                        | 1452   | 0           | DY10               | rRNA        | soil                                                     |                  | 1         | 1452     | TRUE    | ncbi_filtered | 1178516 |
| NZ_CP014263_3067265_3068776 | 1178516 | NZ_CP014263     | Spirosoma montaniterrae strain DY10, complete genome                                       | 17-Apr-17     | 4-Jan-18      | 1       | Spirosoma montaniterrae                        | RefSeq                        | Spirosoma montaniterrae                        | 1512   | 0           | DY10               | genomic DNA | soil                                                     |                  | 3067265   | 3068776  | TRUE    | ncbi_filtered | 1178516 |
| NZ_CP014263_5309822_5311333 | 1178516 | NZ_CP014263     | Spirosoma montaniterrae strain DY10, complete genome                                       | 17-Apr-17     | 4-Jan-18      | 1       | Spirosoma montaniterrae                        | RefSeq                        | Spirosoma montaniterrae                        | 1512   | 0           | DY10               | genomic DNA | soil                                                     |                  | 5309822   | 5311333  | TRUE    | ncbi_filtered | 1178516 |
| NR_133752_1_1397            | 1179782 | NR_133752       | Gemella parahaemolyans strain NTUH_1465 16S ribosomal RNA, partial sequence                | 4-Dec-15      | 4-Jan-18      | 1       | Gemella parahaemolyans                         | RefSeq                        | Gemella parahaemolyans                         | 1397   | 0           | NTUH_1465          | rRNA        |                                                          |                  | 1         | 1397     | TRUE    | ncbi_filtered | 1179782 |
| HM103932_1_1370             | 1179782 | HM103932        | Gemella taiwanensis strain NTUH_2196 16S ribosomal RNA gene, partial sequence              | 6-Nov-15      | 4-Jan-18      | 1       | Gemella taiwanensis                            |                               | Gemella taiwanensis                            | 1370   | 0           | NTUH_2196          | genomic DNA |                                                          |                  | 1         | 1370     | FALSE   | ncbi_filtered | 1179782 |
| NR_133753_1_1426            | 1179782 | NR_133753       | Gemella taiwanensis strain NTUH_5572 16S ribosomal RNA, partial sequence                   | 4-Dec-15      | 4-Jan-18      | 1       | Gemella taiwanensis                            | RefSeq                        | Gemella taiwanensis                            | 1426   | 0           | NTUH_5572          | rRNA        |                                                          |                  | 1         | 1426     | TRUE    | ncbi_filtered | 1179782 |
| NR_132395_1_1492            | 1181271 | NR_132395       | Endobacter medicaginis strain M1MS02 16S ribosomal RNA, partial sequence                   | 2-Aug-16      | 4-Jan-18      | 1       | Endobacter medicaginis                         | RefSeq                        | Endobacter medicaginis                         | 1492   | 0           | M1MS02             | rRNA        | nodules                                                  |                  | 1         | 1492     | TRUE    | ncbi_filtered | 1181271 |
| NR_109645_1_1445            | 1181886 | NR_109645       | Saccharopolyspora dendranthemae strain KLBMF 1305 16S ribosomal RNA gene, partial sequence | 3-Feb-15      | 4-Jan-18      | 1       | Saccharopolyspora dendranthemae                | RefSeq                        | Saccharopolyspora dendranthemae                | 1445   | 0           | KLBMF 1305         | rRNA        |                                                          |                  | 1         | 1445     | TRUE    | ncbi_filtered | 1181886 |
| KJ534577_1_1408             | 1187852 | KJ534577        | Methylobacterium tarhaniae strain BMF145 16S ribosomal RNA gene, partial sequence          | 10-May-14     | 4-Jan-18      | 1       | Methylobacterium tarhaniae                     |                               | Methylobacterium tarhaniae                     | 1408   | 0           | BMF145             | genomic DNA | Ficus religiosa phyllosphere                             |                  | 1         | 1408     | FALSE   | ncbi_filtered | 1187852 |
| NR_109649_1_1417            | 1187852 | NR_109649       | Methylobacterium tarhaniae strain N4211 16S ribosomal RNA gene, partial sequence           | 3-Feb-15      | 4-Jan-18      | 1       | Methylobacterium tarhaniae                     | RefSeq                        | Methylobacterium tarhaniae                     | 1417   | 0           | N4211              | rRNA        | soil                                                     |                  | 1         | 1417     | TRUE    | ncbi_filtered | 1187852 |
| HE815467_1_1462             | 1190415 | HE815467        | Pseudomonas asturiensis partial 16S rRNA gene, strain LPPA 816                             | 24-Apr-14     | 4-Jan-18      | 1       | Pseudomonas asturiensis                        |                               | Pseudomonas asturiensis                        | 1462   | 0           | LPPA 816           | genomic DNA | Rolanum nigrum                                           |                  | 1         | 1462     | FALSE   | ncbi_filtered | 1190415 |
| HE815468_1_1437             | 1190415 | HE815468        | Pseudomonas asturiensis partial 16S rRNA gene, strain LPPA 1442                            | 24-Apr-14     | 4-Jan-18      | 1       | Pseudomonas asturiensis                        |                               | Pseudomonas asturiensis                        | 1437   | 0           | LPPA 1442          | genomic DNA | Solanum sp.                                              |                  | 1         | 1437     | FALSE   | ncbi_filtered | 1190415 |
| NZ_FRDA01000038_269_1814    | 1190415 | NZ_FRDA01000038 | Pseudomonas asturiensis strain LMG 26898, whole genome shotgun sequence                    | 17-Apr-17     | 4-Jan-18      | 1       | Pseudomonas asturiensis                        | WGS,RefSeq                    | Pseudomonas asturiensis                        | 1546   | 0           | LMG 26898          | genomic DNA |                                                          |                  | 269       | 1814     | TRUE    | ncbi_filtered | 1190415 |
| NR_148576_1_1489            | 1210884 | NR_148576       | Gemmata massiliana strain IL30 16S ribosomal RNA, partial sequence                         | 2-Aug-17      | 4-Jan-18      | 1       | Gemmata massiliana                             | RefSeq                        | Gemmata massiliana                             | 1489   | 0           | IL30               | rRNA        | hospital water network                                   |                  | 1         | 1489     | TRUE    | ncbi_filtered | 1210884 |
| NR_134122_1_1425            | 1214787 | NR_134122       | Paracoccus sediminis strain CMB17 16S ribosomal RNA, partial sequence                      | 14-Dec-15     | 4-Jan-18      | 1       | Paracoccus sediminis                           | RefSeq                        | Paracoccus sediminis                           | 1425   | 0           | CMB17              | rRNA        | sediment                                                 |                  | 1         | 1425     | TRUE    | ncbi_filtered | 1214787 |
| NZ_FZNM01000028_3845_5311   | 1214787 | NZ_FZNM01000028 | Paracoccus sediminis strain DSM 26170, whole genome shotgun sequence                       | 21-Jul-17     | 4-Jan-18      | 1       | Paracoccus sediminis                           | WGS,RefSeq                    | Paracoccus sediminis                           | 1467   | 0           | DSM 26170          | genomic DNA |                                                          |                  | 3845      | 5311     | TRUE    | ncbi_filtered | 1214787 |
| NR_126260_1_1239            | 1229656 | NR_126260       | Acidibacter ferrireducens strain MCF85 16S ribosomal RNA gene, partial sequence            | 3-Feb-15      | 4-Jan-18      | 1       | Acidibacter ferrireducens                      | RefSeq                        | Acidibacter ferrireducens                      | 1239   | 0           | MCF85              | rRNA        | mine pit lakes Iberian pyritic belt (IPB)                |                  | 1         | 1239     | TRUE    | ncbi_filtered | 1229656 |
| NR_144708_1_1456            | 1232427 | NR_144708       | Corynebacterium thumii strain GD7 16S ribosomal RNA, partial sequence                      | 16-Dec-16     | 4-Jan-18      | 1       | Corynebacterium thumii                         | RefSeq                        | Corynebacterium thumii                         | 1456   | 3           | GD7                | rRNA        | feces                                                    |                  | 1         | 1456     | TRUE    | ncbi_filtered | 1232427 |
| NZ_HG001324_250_1774        | 1232427 | NZ_HG001324     | Corynebacterium thumii strain GD7, whole genome shotgun sequence                           | 3-Jan-18      | 4-Jan-18      | 1       | Corynebacterium thumii                         | WGS,RefSeq                    | Corynebacterium thumii                         | 1525   | 0           | GD7                | genomic DNA |                                                          |                  | 250       | 1774     | TRUE    | ncbi_filtered | 1232427 |
| NR_133027_1_1519            | 1232428 | NR_133027       | Megasphaera massiliensis strain NP3 16S ribosomal RNA, partial sequence                    | 2-Aug-16      | 4-Jan-18      | 1       | Megasphaera massiliensis                       | RefSeq                        | Megasphaera massiliensis                       | 1519   | 0           | NP3                | rRNA        | stool                                                    |                  | 1         | 1519     | TRUE    | ncbi_filtered | 1232428 |
| NZ_HF954533_3582_5043       | 1232428 | NZ_HF954533     | Megasphaera massiliensis strain NP3, whole genome shotgun sequence                         | 8-Apr-17      | 4-Jan-18      | 1       | Megasphaera massiliensis                       | WGS,RefSeq                    | Megasphaera massiliensis                       | 1462   | 0           | NP3                | genomic DNA |                                                          |                  | 3582      | 5043     | TRUE    | ncbi_filtered | 1232428 |
| NZ_HF954548_3587_5142       | 1232428 | NZ_HF954548     | Megasphaera massiliensis strain NP3, whole genome shotgun sequence                         | 8-Apr-17      | 4-Jan-18      | 1       | Megasphaera massiliensis                       | WGS,RefSeq                    | Megasphaera massiliensis                       | 1556   | 0           | NP3                | genomic DNA |                                                          |                  | 3587      | 5142     | TRUE    | ncbi_filtered | 1232428 |
| NZ_ICA01000002_7_1504       | 1233231 | NZ_ICA01000002  | Scytonema tolypochryoides VB-61278 scaffold_10, whole genome shotgun sequence              | 16-Apr-17     | 4-Jan-18      | 1       | Scytonema tolypochryoides VB-61278             | WGS,RefSeq                    | Scytonema tolypochryoides VB-61278             | 1498   | 0           | VB-61278           | genomic DNA | environmental                                            |                  | 7         | 1504     | FALSE   | ncbi_filtered | 1233230 |
| NZ_ICA01000003_6001_7484    | 1233231 | NZ_ICA01000003  | Scytonema tolypochryoides VB-61278 scaffold_29, whole genome shotgun sequence              | 16-Apr-17     | 4-Jan-18      | 1       | Scytonema tolypochryoides VB-61278             | WGS,RefSeq                    | Scytonema tolypochryoides VB-61278             | 1484   | 0           | VB-61278           | genomic DNA | environmental                                            |                  | 6001      | 7484     | FALSE   | ncbi_filtered | 1233230 |
| NZ_ICA01001019_4491_5984    | 1233231 | NZ_ICA01001019  | Scytonema tolypochryoides VB-61278 scaffold_63, whole genome shotgun sequence              | 16-Apr-17     | 4-Jan-18      | 1       | Scytonema tolypochryoides VB-61278             | WGS,RefSeq                    | Scytonema tolypochryoides VB-61278             | 1494   | 13          | VB-61278           | genomic DNA | environmental                                            |                  | 4491      | 5984     | FALSE   |               |         |



| seqname                     | tax_id  | accession       | description                                                                                   | modified_date | download_date | version_num | source                                                 | keywords                      | organism                                             | length | ambig_count | strain            | mol_type    | isolate | isolation_source                                          | seq_start | seq_stop | isotype | collection    | species       |        |
|-----------------------------|---------|-----------------|-----------------------------------------------------------------------------------------------|---------------|---------------|-------------|--------------------------------------------------------|-------------------------------|------------------------------------------------------|--------|-------------|-------------------|-------------|---------|-----------------------------------------------------------|-----------|----------|---------|---------------|---------------|--------|
| NZ_DFI58903_279_1816        | 100706  | NZ_DFI58903     | Oscillatoria ruminantium GH1, whole genome shotgun sequence                                   | 8-Apr-17      | 4-Jan-18      | 1           | Oscillatoria ruminantium GH1                           | WGS;RefSeq;HIGH_QUALITY_DRAFT | Oscillatoria ruminantium GH1                         | 1538   | 0           | GH1               | genomic DNA |         |                                                           |           | 279      | 1816    | TRUE          | ncbi_filtered | 126347 |
| NZ_HE978599_3386_4919       | 1095770 | NZ_HE978599     | Peptoniphilus timonensis JC401, whole genome shotgun sequence                                 | 8-Apr-17      | 4-Jan-18      | 1           | Peptoniphilus timonensis JC401                         | WGS;RefSeq                    | Peptoniphilus timonensis JC401                       | 1534   | 0           | JC401             | genomic DNA |         | host stool sample                                         | 3386      | 4919     | TRUE    | ncbi_filtered | 1262454       |        |
| MF942375_1_1338             | 1282439 | MF942375        | Paracoccus communis strain ZX-3 16S ribosomal RNA gene, partial sequence                      | 17-Sep-17     | 4-Jan-18      | 1           | Paracoccus communis                                    |                               | Paracoccus communis                                  | 1438   | 0           | ZX-3              | genomic DNA |         | activated sludge from wastewater treatment system         | 1         | 1438     | FALSE   | ncbi_filtered | 1282439       |        |
| NR_133809_1_1428            | 1282439 | NR_133809       | Paracoccus communis strain 53 16S ribosomal RNA, partial sequence                             | 4-Dec-15      | 4-Jan-18      | 1           | Paracoccus communis                                    | RefSeq                        | Paracoccus communis                                  | 1428   | 0           | 53                | rRNA        |         | sludge                                                    | 1         | 1428     | TRUE    | ncbi_filtered | 1282439       |        |
| NR_118323_1_1469            | 1118056 | NR_118323       | Anaerococcus obsiensis strain pH10 16S ribosomal RNA, partial sequence                        | 28-Oct-15     | 4-Jan-18      | 1           | Anaerococcus obsiensis pH10                            | RefSeq                        | Anaerococcus obsiensis pH10                          | 1469   | 0           | pH10              | rRNA        |         |                                                           | 1         | 1469     | TRUE    | ncbi_filtered | 1287640       |        |
| KM488474_1_1435             | 1287736 | KM488474        | Achromobacter aegrifaciens strain D28 16S ribosomal RNA gene, partial sequence                | 30-Oct-14     | 4-Jan-18      | 1           | Achromobacter aegrifaciens                             |                               | Achromobacter aegrifaciens                           | 1435   | 0           | D28               | genomic DNA |         | rhizosphere                                               | 1         | 1435     | FALSE   | ncbi_filtered | 1287736       |        |
| KP241015_1_1449             | 1287736 | KP241015        | Achromobacter aegrifaciens strain B1 16S ribosomal RNA gene, partial sequence                 | 6-May-15      | 4-Jan-18      | 1           | Achromobacter aegrifaciens                             |                               | Achromobacter aegrifaciens                           | 1449   | 0           | B1                | genomic DNA |         | petroleum contaminated soil                               | 1         | 1449     | FALSE   | ncbi_filtered | 1287736       |        |
| K1970612_1_1389             | 1287736 | K1970612        | Achromobacter aegrifaciens strain SMC54 16S ribosomal RNA gene, partial sequence              | 2-Apr-16      | 4-Jan-18      | 1           | Achromobacter aegrifaciens                             |                               | Achromobacter aegrifaciens                           | 1389   | 0           | SMC54             | genomic DNA |         | malachite green effluent                                  | 1         | 1389     | FALSE   | ncbi_filtered | 1287736       |        |
| KX442766_1_1244             | 1287736 | KX442766        | Achromobacter aegrifaciens strain C2 16S ribosomal RNA gene, partial sequence                 | 29-Jun-16     | 4-Jan-18      | 1           | Achromobacter aegrifaciens                             |                               | Achromobacter aegrifaciens                           | 1244   | 0           | C2                | genomic DNA |         | on-farm biopurification system (B-P5) biomixture          | 1         | 1244     | FALSE   | ncbi_filtered | 1287736       |        |
| NR_117707_1_1483            | 1287736 | NR_117707       | Achromobacter aegrifaciens strain LMG 26852 16S ribosomal RNA gene, partial sequence          | 3-Feb-15      | 4-Jan-18      | 1           | Achromobacter aegrifaciens                             | RefSeq                        | Achromobacter aegrifaciens                           | 1483   | 2           | LMG 26852         | rRNA        |         |                                                           | 1         | 1483     | TRUE    | ncbi_filtered | 1287736       |        |
| NR_118220_1_1416            | 1033733 | NR_118220       | Anaerococcus senegalensis strain JC48 16S ribosomal RNA gene, shotgun sequence                | 3-Feb-15      | 4-Jan-18      | 1           | Anaerococcus senegalensis JC48                         | RefSeq                        | Anaerococcus senegalensis JC48                       | 1416   | 0           | JC48              | rRNA        |         |                                                           | 1         | 1416     | TRUE    | ncbi_filtered | 1288120       |        |
| NZ_CAEK0100023_26_1559      | 1033733 | NZ_CAEK0100023  | Anaerococcus senegalensis JC48 strain type strain: JC17, whole genome shotgun sequence        | 17-Apr-17     | 4-Jan-18      | 1           | Anaerococcus senegalensis JC48                         | WGS;RefSeq                    | Anaerococcus senegalensis JC48                       | 1534   | 0           | type strain: JC17 | genomic DNA |         | host stool sample                                         | 26        | 1559     | FALSE   | ncbi_filtered | 1288120       |        |
| NR_116953_1_1486            | 1288393 | NR_116953       | Corynebacterium pilbarensis strain IMMIB WACC-658 16S ribosomal RNA gene, partial sequence    | 3-Feb-15      | 4-Jan-18      | 1           | Corynebacterium pilbarensis                            | RefSeq                        | Corynebacterium pilbarensis                          | 1486   | 0           | IMMIB WACC-658    | rRNA        |         |                                                           | 1         | 1486     | TRUE    | ncbi_filtered | 1288393       |        |
| NR_133831_1_1353            | 1294048 | NR_133831       | Psychrogliobacter arctica strain MG-76 16S ribosomal RNA, partial sequence                    | 4-Dec-15      | 4-Jan-18      | 1           | Psychrogliobacter arctica                              | RefSeq                        | Psychrogliobacter arctica                            | 1353   | 0           | MG-76             | rRNA        |         |                                                           | 1         | 1353     | TRUE    | ncbi_filtered | 1294048       |        |
| NR_137381_1_1463            | 1296669 | NR_137381       | Aquabacterium olei strain NH-1 16S ribosomal RNA, partial sequence                            | 24-Jun-16     | 4-Jan-18      | 1           | Aquabacterium olei                                     | RefSeq                        | Aquabacterium olei                                   | 1463   | 0           | NH-1              | rRNA        |         | oil-contaminated soil                                     | 1         | 1463     | TRUE    | ncbi_filtered | 1296669       |        |
| NR_125464_1_1451            | 1297424 | NR_125464       | Anaerobacterium chartisolvens strain T-1-35 16S ribosomal RNA gene, partial sequence          | 3-Feb-15      | 4-Jan-18      | 1           | Anaerobacterium chartisolvens                          | RefSeq                        | Anaerobacterium chartisolvens                        | 1451   | 0           | T-1-35            | rRNA        |         | soil of rice field                                        | 1         | 1451     | TRUE    | ncbi_filtered | 1297424       |        |
| NR_134781_1_1469            | 1299998 | NR_134781       | Olsenella scatoligenes strain SK9K4 16S ribosomal RNA, partial sequence                       | 15-Jan-16     | 4-Jan-18      | 1           | Olsenella scatoligenes                                 | RefSeq                        | Olsenella scatoligenes                               | 1469   | 0           | SK9K4             | rRNA        |         | intestine                                                 | 1         | 1469     | TRUE    | ncbi_filtered | 1299998       |        |
| NZ_LOF01000014_239_1759     | 1299998 | NZ_LOF01000014  | Olsenella scatoligenes strain SK9K4 contig_7, whole genome shotgun sequence                   | 11-Apr-17     | 4-Jan-18      | 1           | Olsenella scatoligenes                                 | WGS;RefSeq                    | Olsenella scatoligenes                               | 1521   | 0           | SK9K4             | genomic DNA |         | swine feces                                               | 239       | 1759     | TRUE    | ncbi_filtered | 1299998       |        |
| NR_133028_1_1476            | 1301100 | NR_133028       | Clostridium dakarensis strain FF1 16S ribosomal RNA, partial sequence                         | 2-Aug-16      | 4-Jan-18      | 1           | [Clostridium] dakarensis                               | RefSeq                        | [Clostridium] dakarensis                             | 1476   | 0           | FF1               | rRNA        |         | stool                                                     | 1         | 1476     | TRUE    | ncbi_filtered | 1301100       |        |
| NZ_HG529443_32_1346         | 1301100 | NZ_HG529443     | [Clostridium] dakarensis strain FF1, whole genome shotgun sequence                            | 9-Apr-17      | 4-Jan-18      | 1           | [Clostridium] dakarensis                               | WGS;RefSeq                    | [Clostridium] dakarensis                             | 1315   | 0           | FF1               | genomic DNA |         |                                                           | 32        | 1346     | TRUE    | ncbi_filtered | 1301100       |        |
| CP020122_407343_408859      | 1318617 | CP020122        | Candidatus Mycoplasma girderii isolate UC_B3, complete genome                                 | 11-Jul-17     | 4-Jan-18      | 1           | Candidatus Mycoplasma girderii (human oral metagenome) | ENV                           | Candidatus Mycoplasma girderii                       | 1517   | 0           |                   | genomic DNA | UC_B3   | saliva from low-birthweight baby three days 15, 18 and 21 | 407343    | 408859   | FALSE   | ncbi_filtered | 1318617       |        |
| NR_148643_1_1523            | 1324350 | NR_148643       | Acinetobacter equi strain 114 16S ribosomal RNA, partial sequence                             | 2-Aug-17      | 4-Jan-18      | 1           | Acinetobacter equi                                     | RefSeq                        | Acinetobacter equi                                   | 1523   | 0           | 114               | rRNA        |         | feces                                                     | 1         | 1523     | TRUE    | ncbi_filtered | 1324350       |        |
| NZ_CP012808_1435944_1437488 | 1324350 | NZ_CP012808     | Acinetobacter equi strain 114, complete genome                                                | 6-Apr-17      | 4-Jan-18      | 1           | Acinetobacter equi                                     | RefSeq                        | Acinetobacter equi                                   | 1545   | 0           | 114               | genomic DNA |         | horse dung                                                | 1435944   | 1437488  | TRUE    | ncbi_filtered | 1324350       |        |
| KU051414_1_1273             | 1329895 | KU051414        | Novosphingobium lindaniclasticum strain LPB017 16S ribosomal RNA gene, partial sequence       | 7-Dec-15      | 4-Jan-18      | 1           | Novosphingobium lindaniclasticum                       | RefSeq                        | Novosphingobium lindaniclasticum                     | 1273   | 0           | LPB017            | genomic DNA |         | sea water                                                 | 1         | 1273     | FALSE   | ncbi_filtered | 1329895       |        |
| KX380918_1_1350             | 1329895 | KX380918        | Novosphingobium lindaniclasticum strain IL-Asp23 16S ribosomal RNA gene, partial sequence     | 6-Jul-17      | 4-Jan-18      | 1           | Novosphingobium lindaniclasticum                       | RefSeq                        | Novosphingobium lindaniclasticum                     | 1270   | 0           | IL-Asp23          | genomic DNA |         | insect tegument                                           | 1         | 1350     | FALSE   | ncbi_filtered | 1329895       |        |
| NZ_ATHL01000125_1096930     | 1329895 | NZ_ATHL01000125 | Novosphingobium lindaniclasticum LE124 contig125, whole genome shotgun sequence               | 8-Apr-17      | 4-Jan-18      | 1           | Novosphingobium lindaniclasticum LE124                 | WGS;RefSeq                    | Novosphingobium lindaniclasticum LE124               | 1497   | 0           | LE124             | genomic DNA |         | hexachlorocyclohexane(HCH) pesticide-contaminated soil    | 101       | 1597     | TRUE    | ncbi_filtered | 1329895       |        |
| CP005957_691027_692517      | 1332188 | CP005957        | Candidatus Saccharimonas aalborgensis, complete genome                                        | 30-Jan-14     | 4-Jan-18      | 1           | Candidatus Saccharimonas aalborgensis                  |                               | Candidatus Saccharimonas aalborgensis                | 1491   | 0           |                   | genomic DNA |         |                                                           | 691027    | 692517   | FALSE   | ncbi_filtered | 1332188       |        |
| KC463191_1_1489             | 1352643 | KC463191        | Leptolyngbya scottii EcFYyy_00 16S ribosomal RNA gene, partial sequence                       | 28-Oct-13     | 4-Jan-18      | 1           | Leptolyngbya scottii EcFYyy_00                         | RefSeq                        | Leptolyngbya scottii EcFYyy_00                       | 1489   | 0           | EcFYyy_00         | genomic DNA |         |                                                           | 1         | 1489     | FALSE   | ncbi_filtered | 1346802       |        |
| NR_134155_1_1474            | 1346888 | NR_134155       | Rhodoligotrophus jinshengii strain BUT-3 16S ribosomal RNA, partial sequence                  | 14-Dec-15     | 4-Jan-18      | 1           | Rhodoligotrophus jinshengii                            | RefSeq                        | Rhodoligotrophus jinshengii                          | 1454   | 0           | BUT-3             | rRNA        |         |                                                           | 1         | 1454     | TRUE    | ncbi_filtered | 1346888       |        |
| KC463181_1_1258             | 1352635 | KC463181        | Leptolyngbya cf. 'Albertano-Kovack green' Es_Yyy1000 16S ribosomal RNA gene, partial sequence | 28-Oct-13     | 4-Jan-18      | 1           | Leptolyngbya cf. 'Albertano-Kovack green' Es_Yyy1000   | RefSeq                        | Leptolyngbya cf. 'Albertano-Kovack green' Es_Yyy1000 | 1278   | 0           | Es_Yyy1000        | genomic DNA |         |                                                           | 1         | 1278     | FALSE   | ncbi_filtered | 1352615       |        |
| KC463189_1_1490             | 1352637 | KC463189        | Leptolyngbya cf. 'Albertano-Kovack green' Es_Yyy1800 16S ribosomal RNA gene, partial sequence | 28-Oct-13     | 4-Jan-18      | 1           | Leptolyngbya cf. 'Albertano-Kovack green' Es_Yyy1800   | RefSeq                        | Leptolyngbya cf. 'Albertano-Kovack green' Es_Yyy1800 | 1490   | 0           | Es_Yyy1800        | genomic DNA |         |                                                           | 1         | 1490     | FALSE   | ncbi_filtered | 1352615       |        |
| KC463200_1_1486             | 1352631 | KC463200        | Leptolyngbya 'Albertano-Kovack green' EcFYyy_00 16S ribosomal RNA gene, partial sequence      | 28-Oct-13     | 4-Jan-18      | 1           | Leptolyngbya 'Albertano-Kovack green' EcFYyy_00        | RefSeq                        | Leptolyngbya 'Albertano-Kovack green' EcFYyy_00      | 1486   | 0           | EcFYyy_00         | genomic DNA |         |                                                           | 1         | 1486     | FALSE   | ncbi_filtered | 1352615       |        |
| JX511970_1_1370             | 1368430 | JX511970        | Rhizobium sp. W3 16S ribosomal RNA gene, partial sequence                                     | 25-Sep-12     | 4-Jan-18      | 1           | Rhizobium rosettiiformans                              |                               | Rhizobium rosettiiformans                            | 1370   | 0           | M3                | genomic DNA |         |                                                           | 1         | 1370     | FALSE   | ncbi_filtered | 1368430       |        |
| KF848478_1_1311             | 1368430 | KF848478        | Rhizobium rosettiiformans strain MG-7 16S ribosomal RNA gene, partial sequence                | 23-Dec-13     | 4-Jan-18      | 1           | Rhizobium rosettiiformans                              |                               | Rhizobium rosettiiformans                            | 1311   | 0           | MG-7              | genomic DNA |         |                                                           | 1         | 1311     | FALSE   | ncbi_filtered | 1368430       |        |
| KJ401115_1_1350             | 1368430 | KJ401115        | Rhizobium rosettiiformans strain MR-8 16S ribosomal RNA gene, partial sequence                | 1-Apr-14      | 4-Jan-18      | 1           | Rhizobium rosettiiformans                              |                               | Rhizobium rosettiiformans                            | 1350   | 0           | MR-8              | genomic DNA |         |                                                           | 1         | 1350     | FALSE   | ncbi_filtered | 1368430       |        |
| KJ401120_1_1346             | 1368430 | KJ401120        | Rhizobium rosettiiformans strain MG-6 16S ribosomal RNA gene, partial sequence                | 1-Apr-14      | 4-Jan-18      | 1           | Rhizobium rosettiiformans                              |                               | Rhizobium rosettiiformans                            | 1346   | 0           | MG-6              | genomic DNA |         |                                                           | 1         | 1346     | FALSE   | ncbi_filtered | 1368430       |        |
| KY928094_1_1445             | 1368430 | KY928094        | Rhizobium rosettiiformans strain L1 16S ribosomal RNA gene, partial sequence                  | 30-May-17     | 4-Jan-18      | 1           | Rhizobium rosettiiformans                              |                               | Rhizobium rosettiiformans                            | 1445   | 0           | L1                | genomic DNA |         | biofilm of aquaponic system using Ooty Lake water         | 1         | 1445     | FALSE   | ncbi_filtered | 1368430       |        |
| NR_134800_1_1339            | 1368474 | NR_134800       | Romboutsia sedimentorum strain LAM201 16S ribosomal RNA, partial sequence                     | 15-Jan-16     | 4-Jan-18      | 1           | Romboutsia sedimentorum                                | RefSeq                        | Romboutsia sedimentorum                              | 1339   | 0           | LAM201            | rRNA        |         | silt deposit                                              | 1         | 1339     | TRUE    | ncbi_filtered | 1368474       |        |
| NR_133697_1_1478            | 1384638 | NR_133697       | Aridibacter famidurans strain A22_HD_4H 16S ribosomal RNA, partial sequence                   | 4-Dec-15      | 4-Jan-18      | 1           | Aridibacter famidurans                                 | RefSeq                        | Aridibacter famidurans                               | 1478   | 0           | A22_HD_4H         | rRNA        |         | soil                                                      | 1         | 1478     | TRUE    | ncbi_filtered | 1384638       |        |
| KF817707_1_1366             | 1386092 | KF817707        | Cellulomonas carbonis strain AT-95 16S ribosomal RNA gene, partial sequence                   | 27-Jan-14     | 4-Jan-18      | 1           | Cellulomonas carbonis                                  | RefSeq                        | Cellulomonas carbonis                                | 1366   | 0           | AT-95             | genomic DNA |         |                                                           | 1         | 1366     | FALSE   | ncbi_filtered | 1386092       |        |
| NR_118030_1_1442            | 947969  | NR_118030       | Cellulomonas carbonis strain T26 16S ribosomal RNA gene, partial sequence                     | 3-Feb-15      | 4-Jan-18      | 1           | Cellulomonas carbonis T26                              | RefSeq                        | Cellulomonas carbonis T26                            | 1442   | 0           | T26               | rRNA        |         | coal mining soil                                          | 1         | 1442     | TRUE    | ncbi_filtered | 1386092       |        |
| KT021826_1_1428             | 1386098 | KT021826        | Actinotalea ferrariae strain TDI-20 16S ribosomal RNA gene, partial sequence                  | 11-Aug-15     | 4-Jan-18      | 1           | Actinotalea ferrariae                                  | RefSeq                        | Actinotalea ferrariae                                | 1428   | 2           | TDI-20            | genomic DNA |         | desert soil                                               | 1         | 1428     | FALSE   | ncbi_filtered | 1386098       |        |
| NR_118034_1_1483            | 948458  | NR_118034       | Actinotalea ferrariae strain CFS-4 16S ribosomal RNA gene, partial sequence                   | 3-Feb-15      | 4-Jan-18      | 1           | Actinotalea ferrariae CFS-4                            | RefSeq                        | Actinotalea ferrariae CFS-4                          | 1483   | 0           | CFS-4             | rRNA        |         | iron mine                                                 | 1         | 1483     | TRUE    | ncbi_filtered | 1386098       |        |
| CP012333_7086606_7088155    | 1391654 | CP012333        | Labilithrix luteola strain DSM 27648, complete genome                                         | 19-Aug-15     | 4-Jan-18      | 1           | Labilithrix luteola                                    |                               | Labilithrix luteola                                  | 1550   | 0           | DSM 27648         | genomic DNA |         |                                                           | 7086606   | 7088155  | TRUE    | ncbi_filtered | 1391654       |        |
| CP012333_7911704_7913253    | 1391654 | CP012333        | Labilithrix luteola strain DSM 27648, complete genome                                         | 19-Aug-15     | 4-Jan-18      | 1           | Labilithrix luteola                                    |                               | Labilithrix luteola                                  | 1550   | 0           | DSM 27648         | genomic DNA |         |                                                           | 7911704   | 7913253  | TRUE    | ncbi_filtered | 1391654       |        |
| KT195957_1_1389             | 1391911 | KT195957        | Micrococcus aloeverae strain MER_TA_144 16S ribosomal RNA gene, partial sequence              | 28-Nov-15     | 4-Jan-18      | 1           | Micrococcus aloeverae                                  | RefSeq                        | Micrococcus aloeverae                                | 1389   | 0           | MER_TA_144        | genomic DNA |         | Mars Exploration Rover spacecraft surfaces                | 1         | 1389     | FALSE   | ncbi_filtered | 1391911       |        |
| KU1296015_1_1354            | 1391911 | KU1296015       | Micrococcus aloeverae strain AN-04 16S ribosomal RNA gene, partial sequence                   | 22-May-16     | 4-Jan-18      | 1           | Micrococcus aloeverae                                  | RefSeq                        | Micrococcus aloeverae                                | 1354   | 0           | AN-04             | genomic DNA |         |                                                           | 1         | 1354     | FALSE   | ncbi_filtered | 1391911       |        |
| KO082887_1_1378             | 1391911 | KO082887        | Micrococcus aloeverae strain SL-05 16S ribosomal RNA gene, partial sequence                   | 25-May-16     | 4-Jan-18      | 1           | Micrococcus aloeverae                                  | RefSeq                        | Micrococcus aloeverae                                | 1378   | 0           | SL-05             | genomic DNA |         | leaf                                                      | 1         | 1378     | FALSE   | ncbi_filtered | 1391911       |        |
| KO502917_1_1516             | 1391911 | KO502917        | Micrococcus aloeverae strain YIM 130916 16S ribosomal RNA gene, partial sequence              | 13-Aug-16     | 4-Jan-18      | 1           | Micrococcus aloeverae                                  | RefSeq                        | Micrococcus aloeverae                                | 1516   | 0           | YIM 130916        | genomic DNA |         |                                                           | 1         | 1516     | FALSE   | ncbi_filtered | 1391911       |        |
| MF979831_1_1496             | 1391911 | MF979831        | Micrococcus aloeverae strain DCB-20 16S ribosomal RNA                                         |               |               |             |                                                        |                               |                                                      |        |             |                   |             |         |                                                           |           |          |         |               |               |        |

| seqname                        | tax_id  | accession       | description                                                                                       | modified_date | download_date | version | num_source | keywords                      | organism                                     | length | ambig_count | strain              | mol_type    | isolate                                        | seq_start | seq_stop | is_type | collection        | species       |         |
|--------------------------------|---------|-----------------|---------------------------------------------------------------------------------------------------|---------------|---------------|---------|------------|-------------------------------|----------------------------------------------|--------|-------------|---------------------|-------------|------------------------------------------------|-----------|----------|---------|-------------------|---------------|---------|
| NZ_CBYM01000082_23_1543        | 1414720 | NZ_CBYM01000082 | Clostridium saudeense strain JCC, whole genome shotgun sequence                                   | 24-Apr-17     | 4-Jan-18      | 1       |            | WGS;RefSeq                    | Clostridium saudeense                        | 1521   | 0           | JCC                 | genomic DNA |                                                | 23        | 1543     | TRUE    | ncbi_filtered     | 1414720       |         |
| MF838687_1_1292                | 1421430 | MF838687        | Pseudomonas granadensis strain PF29 16S ribosomal RNA gene, partial sequence                      | 12-Sep-17     | 4-Jan-18      | 1       |            |                               | Pseudomonas granadensis                      | 1292   | 0           | PF29                | genomic DNA | dairy product                                  | 1         | 1292     | FALSE   | ncbi_filtered     | 1421430       |         |
| MG269573_1_1411                | 1421430 | MG269573        | Pseudomonas granadensis strain 05C7 16S ribosomal RNA gene, partial sequence                      | 20-Jan-18     | 22-Jan-18     | 1       |            |                               | Pseudomonas granadensis                      | 1411   | 1           | 05C7                | genomic DNA |                                                | 1         | 1411     | FALSE   | ncbi_filtered     | 1421430       |         |
| MG269581_1_1411                | 1421430 | MG269581        | Pseudomonas granadensis strain 09D8 16S ribosomal RNA gene, partial sequence                      | 20-Jan-18     | 22-Jan-18     | 1       |            |                               | Pseudomonas granadensis                      | 1411   | 2           | 09D8                | genomic DNA |                                                | 1         | 1411     | FALSE   | ncbi_filtered     | 1421430       |         |
| MG571650_1_1394                | 1421430 | MG571650        | Pseudomonas granadensis strain HNT6 16S ribosomal RNA gene, partial sequence                      | 2-Dec-17      | 4-Jan-18      | 1       |            |                               | Pseudomonas granadensis                      | 1394   | 0           | HNT6                | genomic DNA | rhizosphere of <i>Trisetopygium willfordii</i> | 1         | 1394     | FALSE   | ncbi_filtered     | 1421430       |         |
| MG571669_1_1394                | 1421430 | MG571669        | Pseudomonas granadensis strain FIT7 16S ribosomal RNA gene, partial sequence                      | 2-Dec-17      | 4-Jan-18      | 1       |            |                               | Pseudomonas granadensis                      | 1394   | 0           | FIT7                | genomic DNA | rhizosphere of <i>Trisetopygium willfordii</i> | 1         | 1394     | FALSE   | ncbi_filtered     | 1421430       |         |
| KJ818094_1_1328                | 1437360 | KJ818094        | <i>Bradyrhizobium erythrophlei</i> strain CCBAU 53266 16S ribosomal RNA gene, partial sequence    | 25-Mar-16     | 4-Jan-18      | 1       |            |                               | <i>Bradyrhizobium erythrophlei</i>           | 1328   | 0           | CCBAU 53266         | genomic DNA |                                                | 1         | 1328     | FALSE   | ncbi_filtered     | 1437360       |         |
| NZ_FHTH01000001_6369310_637008 | 1437360 | NZ_FHTH01000001 | <i>Bradyrhizobium erythrophlei</i> strain MT12, whole genome shotgun sequence                     | 29-Jul-17     | 4-Jan-18      | 1       |            | WGS;RefSeq                    | <i>Bradyrhizobium erythrophlei</i>           | 1499   | 0           | MT12                | genomic DNA |                                                | 6369310   | 637008   | FALSE   | ncbi_filtered     | 1437360       |         |
| NZ_FSRD01000001_23746_238744   | 1437360 | NZ_FSRD01000001 | <i>Bradyrhizobium erythrophlei</i> strain GAS478, whole genome shotgun sequence                   | 16-Apr-17     | 4-Jan-18      | 1       |            | WGS;RefSeq                    | <i>Bradyrhizobium erythrophlei</i>           | 1499   | 0           | GAS478              | genomic DNA |                                                | 23746     | 238744   | FALSE   | ncbi_filtered     | 1437360       |         |
| NZ_L1670817_7221872_7223370    | 1437360 | NZ_L1670817     | <i>Bradyrhizobium erythrophlei</i> strain GAS138 genome assembly, chromosome.I                    | 18-Mar-17     | 4-Jan-18      | 1       |            | RefSeq                        | <i>Bradyrhizobium erythrophlei</i>           | 1499   | 0           | GAS138              | genomic DNA |                                                | 7221872   | 7223370  | FALSE   | ncbi_filtered     | 1437360       |         |
| NZ_L1670849_3915444_3916940    | 1437360 | NZ_L1670849     | <i>Bradyrhizobium erythrophlei</i> strain GAS401 genome assembly, chromosome.I                    | 16-Apr-17     | 4-Jan-18      | 1       |            | RefSeq                        | <i>Bradyrhizobium erythrophlei</i>           | 1497   | 0           | GAS401              | genomic DNA |                                                | 3915444   | 3916940  | FALSE   | ncbi_filtered     | 1437360       |         |
| HC798294_1_1404                | 1442366 | HC798294        | <i>Massilia norwicheensis</i> partial 16S rRNA gene, strain NS9                                   | 4-Feb-16      | 4-Jan-18      | 1       |            |                               | <i>Massilia norwicheensis</i>                | 1404   | 0           | NS9                 | genomic DNA | air of the Sainsbury Centre For Visual Arts    | 1         | 1404     | TRUE    | ncbi_filtered     | 1442366       |         |
| NZ_L1962470_207298_208844      | 1464038 | NZ_L1962470     | <i>Ezakiella peruensis</i> isolate PRIEB22476, whole genome shotgun sequence                      | 10-Nov-17     | 4-Jan-18      | 1       |            | WGS;RefSeq                    | <i>Ezakiella peruensis</i>                   | 1547   | 0           |                     | genomic DNA | PRIEB22476                                     | MX.62     | 207298   | 208844  | TRUE              | ncbi_filtered | 1464038 |
| KF925267_1_1474                | 1465616 | KF925267        | <i>Spirosoma arcticum</i> strain R2-35 16S ribosomal RNA gene, partial sequence                   | 9-Dec-15      | 4-Jan-18      | 1       |            |                               | <i>Spirosoma arcticum</i>                    | 1474   | 0           | R2-35               | genomic DNA | soil                                           | 1         | 1474     | TRUE    | ncbi_filtered     | 1465616       |         |
| NR_125605_1_1482               | 1118057 | NR_125605       | <i>Peptoniphilus grossensis</i> strain pH5 16S ribosomal RNA gene, partial sequence               | 3-Feb-15      | 4-Jan-18      | 1       |            | RefSeq                        | <i>Peptoniphilus grossensis</i> pH5          | 1482   | 0           | pH5                 | rRNA        |                                                | 1         | 1482     | TRUE    | ncbi_filtered     | 1465756       |         |
| NZ_MJIH01000001_596977_598511  | 1465756 | NZ_MJIH01000001 | <i>Peptoniphilus grossensis</i> strain 35-6-1 unitig_0, whole genome shotgun sequence             | 16-Apr-17     | 4-Jan-18      | 1       |            | WGS;RefSeq                    | <i>Peptoniphilus grossensis</i>              | 1535   | 0           | 35-6-1              | genomic DNA | feces                                          | 596977    | 598511   | FALSE   | ncbi_filtered     | 1465756       |         |
| NZ_MJIH01000001_775304_776838  | 1465756 | NZ_MJIH01000001 | <i>Peptoniphilus grossensis</i> strain 35-6-1 unitig_0, whole genome shotgun sequence             | 16-Apr-17     | 4-Jan-18      | 1       |            | WGS;RefSeq                    | <i>Peptoniphilus grossensis</i>              | 1535   | 0           | 35-6-1              | genomic DNA | feces                                          | 775304    | 776838   | FALSE   | ncbi_filtered     | 1465756       |         |
| NZ_MJIH01000001_945367_946901  | 1465756 | NZ_MJIH01000001 | <i>Peptoniphilus grossensis</i> strain 35-6-1 unitig_0, whole genome shotgun sequence             | 16-Apr-17     | 4-Jan-18      | 1       |            | WGS;RefSeq                    | <i>Peptoniphilus grossensis</i>              | 1535   | 0           | 35-6-1              | genomic DNA | feces                                          | 945367    | 946901   | FALSE   | ncbi_filtered     | 1465756       |         |
| NR_125592_1_1386               | 1033744 | NR_125592       | <i>Peptoniphilus senegalensis</i> JC140                                                           | 30-Mar-17     | 4-Jan-18      | 1       |            | RefSeq                        | <i>Peptoniphilus senegalensis</i> JC140      | 1386   | 0           | JC140               | rRNA        |                                                | 1         | 1386     | TRUE    | ncbi_filtered     | 1465757       |         |
| NZ_HE61070_3525_5058           | 1033744 | NZ_HE61070      | <i>Peptoniphilus senegalensis</i> JC140 strain type strain: JC140, whole genome shotgun sequence  | 10-Apr-17     | 4-Jan-18      | 1       |            | WGS;RefSeq                    | <i>Peptoniphilus senegalensis</i> JC140      | 1584   | 0           | type strain: JC140  | genomic DNA | host stool sample                              | 3525      | 5058     | TRUE    | ncbi_filtered     | 1465757       |         |
| KC999384_1_1342                | 1472765 | KC999384        | <i>Peptoniphilus obesi</i> strain SB-AA1-7 16S ribosomal RNA gene, partial sequence               | 31-Oct-14     | 4-Jan-18      | 1       |            |                               | <i>Peptoniphilus obesi</i>                   | 1342   | 0           | SB-AA1-7            | genomic DNA | vaginal swab                                   | 1         | 1342     | TRUE    | freddicks_isolate | 1472765       |         |
| NR_125607_1_1476               | 1118062 | NR_125607       | <i>Peptoniphilus obesi</i> strain ph1 16S ribosomal RNA gene, partial sequence                    | 3-Feb-15      | 4-Jan-18      | 1       |            | RefSeq                        | <i>Peptoniphilus obesi</i> ph1               | 1476   | 0           | ph1                 | rRNA        |                                                | 1         | 1476     | TRUE    | ncbi_filtered     | 1472765       |         |
| NZ_HE978584_90_1618            | 1118062 | NZ_HE978584     | <i>Peptoniphilus obesi</i> ph1, whole genome shotgun sequence                                     | 8-Apr-17      | 4-Jan-18      | 1       |            | WGS;RefSeq                    | <i>Peptoniphilus obesi</i> ph1               | 1529   | 0           | ph1                 | genomic DNA | host stool sample                              | 90        | 1618     | TRUE    | ncbi_filtered     | 1472765       |         |
| NR_125595_1_1341               | 1034345 | NR_125595       | <i>Senegalimassilia anaerobia</i> strain JC110 16S ribosomal RNA gene, partial sequence           | 3-Feb-15      | 4-Jan-18      | 1       |            |                               | <i>Senegalimassilia anaerobia</i> JC110      | 1341   | 0           | JC110               | rRNA        |                                                | 1         | 1341     | TRUE    | ncbi_filtered     | 1473216       |         |
| NZ_HE611021_12_1531            | 1034345 | NZ_HE611021     | <i>Senegalimassilia anaerobia</i> JC110 strain type strain: JC110, whole genome shotgun sequence  | 7-Apr-17      | 4-Jan-18      | 1       |            | WGS;RefSeq                    | <i>Senegalimassilia anaerobia</i> JC110      | 1520   | 0           | type strain: JC110  | genomic DNA | host stool sample                              | 12        | 1531     | TRUE    | ncbi_filtered     | 1473216       |         |
| KJ095109_1_1423                | 1477021 | KJ095109        | <i>Leifsonia</i> sp. ZD5-4 16S ribosomal RNA gene, partial sequence                               | 1-Apr-14      | 4-Jan-18      | 1       |            |                               | <i>Conyotiza nivalis</i>                     | 1423   | 0           | ZD5-4               | genomic DNA | ice/snow                                       | 1         | 1423     | TRUE    | ncbi_filtered     | 1477021       |         |
| NR_134732_1_1472               | 1493691 | NR_134732       | <i>Dyadobacter sedminis</i> strain Z12 16S ribosomal RNA, partial sequence                        | 15-Jan-16     | 4-Jan-18      | 1       |            | RefSeq                        | <i>Dyadobacter sedminis</i>                  | 1472   | 0           | Z12                 | rRNA        |                                                | 1         | 1472     | TRUE    | ncbi_filtered     | 1493691       |         |
| U021125_1_1476                 | 1499689 | U021125         | <i>Clostridium</i> sp. LF2 partial 16S rRNA gene, isolate LF2                                     | 5-Jun-14      | 4-Jan-18      | 1       |            |                               | <i>Clostridium</i> sp. LF2                   | 1476   | 0           |                     | genomic DNA | LF2                                            | 1         | 1476     | TRUE    | ncbi_filtered     | 1499689       |         |
| NZ_CCKF01000005_4677_6193      | 1499689 | NZ_CCKF01000005 | <i>Clostridium</i> sp. LF2, whole genome shotgun sequence                                         | 9-Apr-17      | 4-Jan-18      | 1       |            | WGS;RefSeq                    | <i>Clostridium</i> sp. LF2                   | 1517   | 0           |                     | genomic DNA |                                                | 4677      | 6193     | FALSE   | ncbi_filtered     | 1499689       |         |
| KJ567598_1_1505                | 1501432 | KJ567598        | <i>Thiopseudomonas denitrificans</i> strain X2 16S ribosomal RNA gene, partial sequence           | 6-Jan-16      | 4-Jan-18      | 1       |            |                               | <i>Thiopseudomonas denitrificans</i>         | 1505   | 0           | X2                  | genomic DNA |                                                | 1         | 1505     | TRUE    | ncbi_filtered     | 1501432       |         |
| KJ580430_1_1308                | 1502943 | KJ580430        | <i>Vellionella</i> sp. FFA-2014 strain 29/01/05-B-6143 16S ribosomal RNA gene, partial sequence   | 21-Oct-14     | 4-Jan-18      | 1       |            |                               | <i>Vellionella seminalis</i>                 | 1308   | 0           | 29/01/05-B-6143     | genomic DNA | Bartholin gland abscess                        | 1         | 1308     | FALSE   | ncbi_filtered     | 1502943       |         |
| NZ_JH992937_669966_671534      | 883156  | NZ_JH992937     | <i>Vellionella seminalis</i> ACS-216-V-Colib supercont1.2, whole genome shotgun sequence          | 8-Apr-17      | 4-Jan-18      | 1       |            | WGS;HIGH_QUALITY_DRAFT;RefSeq | <i>Vellionella seminalis</i> ACS-216-V-Colib | 1569   | 0           | ACS-216-V-Colib     | genomic DNA | biological product (ENVO:02000043)             | 669966    | 671534   | FALSE   | ncbi_filtered     | 1502943       |         |
| MH109025_1_1413                | 1504265 | MH109025        | <i>Bacillus malikii</i> strain 16PB3 16S ribosomal RNA gene, partial sequence                     | 28-Mar-18     | 31-Mar-18     | 1       |            |                               | <i>Bacillus malikii</i>                      | 1413   | 0           | 16PB3               | genomic DNA | carcinogenic fluid sample                      | 1         | 1413     | FALSE   | ncbi_filtered     | 1504265       |         |
| NR_146005_1_1492               | 1504265 | NR_146005       | <i>Bacillus malikii</i> strain NCCP-662 16S ribosomal RNA, partial sequence                       | 28-Feb-17     | 4-Jan-18      | 1       |            | RefSeq                        | <i>Bacillus malikii</i>                      | 1492   | 0           | NCCP-662            | rRNA        | tanneries effluent (water and sludge)          | 1         | 1492     | TRUE    | ncbi_filtered     | 1504265       |         |
| LT631493_1_1551                | 1522312 | LT631493        | <i>Kingella</i> sp. SW7208426 partial 16S rRNA gene, strain SW7208426                             | 17-Nov-16     | 4-Jan-18      | 1       |            |                               | <i>Kingella negevensis</i>                   | 1551   | 0           | SW7208426           | genomic DNA | oropharynx                                     | 1         | 1551     | FALSE   | ncbi_filtered     | 1522312       |         |
| LT631505_1_1387                | 1522312 | LT631505        | <i>Kingella</i> sp. D2292 partial 16S rRNA gene, strain D2292                                     | 17-Nov-16     | 4-Jan-18      | 1       |            |                               | <i>Kingella negevensis</i>                   | 1387   | 0           | D2292               | genomic DNA | oropharynx                                     | 1         | 1387     | FALSE   | ncbi_filtered     | 1522312       |         |
| NZ_FXU02000073_138_1688        | 1522312 | NZ_FXU02000073  | <i>Kingella negevensis</i> isolate Kingella_eburonensis, whole genome shotgun sequence            | 16-Oct-17     | 4-Jan-18      | 1       |            | WGS;RefSeq                    | <i>Kingella negevensis</i>                   | 1551   | 0           |                     | genomic DNA | Kingella_eburonensis                           | 138       | 1688     | FALSE   | ncbi_filtered     | 1522312       |         |
| LN898186_1_1404                | 1522368 | LN898186        | <i>Modestobacter caceresii</i> partial 16S rRNA gene, strain KNN 45-1a                            | 28-Jun-16     | 4-Jan-18      | 1       |            |                               | <i>Modestobacter caceresii</i>               | 1404   | 1           | KNN 45-1a           | genomic DNA | soil                                           | 1         | 1404     | FALSE   | ncbi_filtered     | 1522368       |         |
| NR_137398_1_1390               | 1522368 | NR_137398       | <i>Modestobacter caceresii</i> strain KNN 45-2b 16S ribosomal RNA, partial sequence               | 24-Jun-16     | 4-Jan-18      | 1       |            | RefSeq                        | <i>Modestobacter caceresii</i>               | 1390   | 0           | KNN 45-2b           | rRNA        | soil                                           | 1         | 1390     | TRUE    | ncbi_filtered     | 1522368       |         |
| NZ_IPMX01000078_150_1681       | 1522368 | NZ_IPMX01000078 | <i>Modestobacter caceresii</i> strain KNN 45-2b ac16_sequence_0078, whole genome shotgun sequence | 9-Apr-17      | 4-Jan-18      | 1       |            | WGS;RefSeq                    | <i>Modestobacter caceresii</i>               | 1532   | 0           | KNN 45-2b           | genomic DNA | soil                                           | 150       | 1681     | TRUE    | ncbi_filtered     | 1522368       |         |
| KJ75879_1_1427                 | 1524096 | KJ75879         | <i>Mucilaginibacter</i> sp. NH7-4 16S ribosomal RNA gene, partial sequence                        | 27-Sep-16     | 4-Jan-18      | 2       |            |                               | <i>Mucilaginibacter psychrotolerans</i>      | 1427   | 0           | NH7-4               | genomic DNA | peatlands                                      | 1         | 1427     | TRUE    | ncbi_filtered     | 1524096       |         |
| NR_151867_1_1445               | 1528099 | NR_151867       | <i>Lawsonella clevelandensis</i> strain X1036, complete genome                                    | 15-Nov-17     | 4-Jan-18      | 1       |            | RefSeq                        | <i>Lawsonella clevelandensis</i>             | 1445   | 0           | X1036               | rRNA        | spinal abscess                                 | 1         | 1445     | TRUE    | ncbi_filtered     | 1528099       |         |
| NZ_CP090312_1832900_1834429    | 1528099 | NZ_CP090312     | <i>Lawsonella clevelandensis</i> strain X1036, complete genome                                    | 25-Sep-17     | 4-Jan-18      | 1       |            | RefSeq                        | <i>Lawsonella clevelandensis</i>             | 1530   | 0           | X1036               | genomic DNA | abscess                                        | 1832900   | 1834429  | TRUE    | ncbi_filtered     | 1528099       |         |
| AJ303011_1_1466                | 1530123 | AJ303011        | <i>Acinetobacter seifertii</i> RHU1139 16S rRNA gene                                              | 20-Jan-16     | 4-Jan-18      | 1       |            |                               | <i>Acinetobacter seifertii</i>               | 1466   | 0           | RHU1139 (Aci 658)   | genomic DNA |                                                | 1         | 1466     | FALSE   | ncbi_filtered     | 1530123       |         |
| NZ_APTC01000137_3580_5124      | 1530123 | NZ_APTC01000137 | <i>Acinetobacter seifertii</i> strain C917 contig00137, whole genome shotgun sequence             | 24-May-17     | 4-Jan-18      | 1       |            | WGS;RefSeq                    | <i>Acinetobacter seifertii</i>               | 1545   | 0           | C917                | genomic DNA |                                                | 3580      | 5124     | FALSE   | ncbi_filtered     | 1530123       |         |
| NR_K8851199_508535_510079      | 1530123 | NR_K8851199     | <i>Acinetobacter seifertii</i> strain NIPH 973 acMai-supercont1.13, whole genome shotgun sequence | 3-Aug-17      | 4-Jan-18      | 1       |            | WGS;RefSeq                    | <i>Acinetobacter seifertii</i>               | 1545   | 0           | NIPH 973            | genomic DNA | Ulcer                                          | 508535    | 510079   | TRUE    | ncbi_filtered     | 1530123       |         |
| Z93449_1_1417                  | 1530123 | Z93449          | <i>Acinetobacter seifertii</i> 16S rRNA gene type strain 100897                                   | 20-Jan-16     | 4-Jan-18      | 1       |            |                               | <i>Acinetobacter seifertii</i>               | 1417   | 0           | type strain: 100897 | genomic DNA |                                                | 1         | 1417     | TRUE    | ncbi_filtered     | 1530123       |         |
| NR_145655_1_1402               | 1540163 | NR_145655       | <i>Flavobacterium endophyticum</i> strain 522 16S ribosomal RNA, partial sequence                 | 31-Jan-17     | 4-Jan-18      | 1       |            | RefSeq                        | <i>Flavobacterium endophyticum</i>           | 1402   | 0           | 522                 | rRNA        | root of corn                                   | 1         | 1402     | TRUE    | ncbi_filtered     | 1540163       |         |
| MF083139_1_1436                | 1546149 | MF083139        | <i>Diaphrobacter polyhydroxybutyrate</i> strain cp12 16S ribosomal RNA gene, partial sequence     | 21-May-17     | 4-Jan-18      | 1       |            |                               | <i>Diaphrobacter polyhydroxybutyrate</i>     | 1436   | 0           | cp12                | genomic DNA | from soil                                      | 1         | 1436     | FALSE   | ncbi_filtered     | 1546149       |         |
| NR_137222_1_1428               | 1546149 | NR_137222       | <i>Diaphrobacter polyhydroxybutyrate</i> strain SL-205 16S ribosomal RNA, partial sequence        | 1-Jun-16      | 4-Jan-18      | 1       |            | RefSeq                        | <i>Diaphrobacter polyhydroxybutyrate</i>     | 1428   | 0           | SL-205              | rRNA        | solid-phase denitrification reactor            | 1         | 1428     | TRUE    | ncbi_filtered     | 1546149       |         |
| NZ_CP016278_3553391_355        |         |                 |                                                                                                   |               |               |         |            |                               |                                              |        |             |                     |             |                                                |           |          |         |                   |               |         |

| seqname                        | tax_id  | accession       | description                                                                                  | modified_date | download_date | version | num_source                        | keywords   | organism                          | length | ambig_count | strain       | mol_type        | isolate | isolation_source                                                                                                                                             | seq_start | seq_stop | is_type | collection    | species |
|--------------------------------|---------|-----------------|----------------------------------------------------------------------------------------------|---------------|---------------|---------|-----------------------------------|------------|-----------------------------------|--------|-------------|--------------|-----------------|---------|--------------------------------------------------------------------------------------------------------------------------------------------------------------|-----------|----------|---------|---------------|---------|
| NZ_LWH001000015_367_1901       | 1574624 | NZ_LWH001000015 | [Proprionibacterium] nammentense strain NTS 31307302 contig_7, whole genome shotgun sequence | 12-Apr-17     | 4-Jan-18      | 1       | [Proprionibacterium] nammentense  | WGS,RefSeq | [Proprionibacterium] nammentense  | 1535   | 0           | NTS 31307302 | genomic DNA     |         | Bone tissue                                                                                                                                                  | 367       | 1901     | TRUE    | ncbi_filtered | 1574624 |
| MG824960_1_1220                | 1578757 | MG824960        | Kocuria arsenatis strain JBM1 16S ribosomal RNA gene, partial sequence                       | 28-Jan-18     | 14-Feb-18     | 1       | Kocuria arsenatis                 | RefSeq     | Kocuria arsenatis                 | 1220   | 0           | JBM1         | genomic DNA     |         | Boiled Milk                                                                                                                                                  | 1         | 1220     | FALSE   | ncbi_filtered | 1578757 |
| NR_148610_1_1409               | 1578757 | NR_148610       | Kocuria arsenatis strain CM1E1 16S ribosomal RNA, partial sequence                           | 2-Aug-17      | 4-Jan-18      | 1       | Kocuria arsenatis                 | RefSeq     | Kocuria arsenatis                 | 1409   | 0           | CM1E1        | rRNA            |         | root                                                                                                                                                         | 1         | 1409     | TRUE    | ncbi_filtered | 1578757 |
| F1471643_1_1428                | 1307441 | F1471643        | Fusobacterium nucleatum strain CHDC F145 16S ribosomal RNA gene, partial sequence            | 3-Mar-10      | 4-Jan-18      | 1       | Fusobacterium hwasookii CHDC F145 | RefSeq     | Fusobacterium hwasookii CHDC F145 | 1428   | 0           | CHDC F145    | genomic DNA     |         |                                                                                                                                                              | 1         | 1428     | FALSE   | ncbi_filtered | 1583098 |
| NZ_CP013331_1142882_1144429    | 1307442 | NZ_CP013331     | Fusobacterium hwasookii CHDC F174, complete genome                                           | 4-Apr-17      | 4-Jan-18      | 1       | Fusobacterium hwasookii CHDC F174 | RefSeq     | Fusobacterium hwasookii CHDC F174 | 1548   | 0           | CHDC F174    | genomic DNA     |         | subgingival dental plaque                                                                                                                                    | 1142882   | 1144429  | FALSE   | ncbi_filtered | 1583098 |
| NZ_CP013334_1465180_1466731    | 1307444 | NZ_CP013334     | Fusobacterium hwasookii CHDC F300, complete genome                                           | 4-Apr-17      | 4-Jan-18      | 1       | Fusobacterium hwasookii CHDC F300 | RefSeq     | Fusobacterium hwasookii CHDC F300 | 1552   | 0           | CHDC F300    | genomic DNA     |         | subgingival dental plaque                                                                                                                                    | 1465180   | 1466731  | FALSE   | ncbi_filtered | 1583098 |
| NZ_CP013334_1976975_1978526    | 1307444 | NZ_CP013334     | Fusobacterium hwasookii CHDC F300, complete genome                                           | 4-Apr-17      | 4-Jan-18      | 1       | Fusobacterium hwasookii CHDC F300 | RefSeq     | Fusobacterium hwasookii CHDC F300 | 1552   | 0           | CHDC F300    | genomic DNA     |         | subgingival dental plaque                                                                                                                                    | 1976975   | 1978526  | FALSE   | ncbi_filtered | 1583098 |
| NZ_CP013336_1025786_1027337    | 1307443 | NZ_CP013336     | Fusobacterium hwasookii CHDC F206, complete genome                                           | 4-Apr-17      | 4-Jan-18      | 1       | Fusobacterium hwasookii CHDC F206 | RefSeq     | Fusobacterium hwasookii CHDC F206 | 1552   | 0           | CHDC F206    | genomic DNA     |         | subgingival dental plaque                                                                                                                                    | 1025786   | 1027337  | FALSE   | ncbi_filtered | 1583098 |
| NR_136788_1_1491               | 1583331 | NR_136788       | Porphyromonas pastieri strain KJF0501 16S ribosomal RNA, partial sequence                    | 2-Aug-16      | 4-Jan-18      | 1       | Porphyromonas pastieri            | RefSeq     | Porphyromonas pastieri            | 1491   | 0           | KJF0501      | rRNA            |         | human saliva                                                                                                                                                 | 1         | 1491     | TRUE    | ncbi_filtered | 1583331 |
| KR181766_1_1407                | 1585976 | KR181766        | Bergeyella cardium strain 13-07 16S ribosomal RNA gene, partial sequence                     | 21-Dec-14     | 4-Jan-18      | 1       | Bergeyella cardium                | RefSeq     | Bergeyella cardium                | 1407   | 0           | 13-07        | genomic DNA     |         |                                                                                                                                                              | 1         | 1407     | TRUE    | ncbi_filtered | 1585976 |
| KO89082_1_1398                 | 1585976 | KO89082         | Bergeyella cardium strain PU13217 16S ribosomal RNA gene, partial sequence                   | 13-Nov-16     | 4-Jan-18      | 1       | Bergeyella cardium                | RefSeq     | Bergeyella cardium                | 1398   | 0           | PU13217      | genomic DNA     |         |                                                                                                                                                              | 1         | 1398     | FALSE   | ncbi_filtered | 1585976 |
| NR_149301_1_1470               | 1586242 | NR_149301       | Luteimonas arsenica strain 26-35 16S ribosomal RNA, partial sequence                         | 7-Sep-17      | 4-Jan-18      | 1       | Luteimonas arsenica               | RefSeq     | Luteimonas arsenica               | 1470   | 0           | 26-35        | rRNA            |         | arsenic-contaminated sediment of the Jiangnan plain                                                                                                          | 1         | 1470     | TRUE    | ncbi_filtered | 1586242 |
| KP025677_1_1427                | 1589181 | KP025677        | Sphingomonas sp. GP20-2 16S ribosomal RNA gene, partial sequence                             | 27-Oct-15     | 4-Jan-18      | 1       | Sphingomonas parvus               | RefSeq     | Sphingomonas parvus               | 1427   | 1           | GP20-2       | genomic DNA     |         | soil cultivated with ginseng                                                                                                                                 | 1         | 1427     | TRUE    | ncbi_filtered | 1589181 |
| NR_137206_1_1404               | 1604774 | NR_137206       | Novosphingobium gossypii strain JM-1396 16S ribosomal RNA, partial sequence                  | 1-Jun-16      | 4-Jan-18      | 1       | Novosphingobium gossypii          | RefSeq     | Novosphingobium gossypii          | 1404   | 0           | JM-1396      | rRNA            |         | stem tissue                                                                                                                                                  | 1         | 1404     | TRUE    | ncbi_filtered | 1604774 |
| NR_145898_1_1450               | 1609977 | NR_145898       | Sphingomonas hengshuensis strain HSW6 16S ribosomal RNA, partial sequence                    | 14-Feb-17     | 4-Jan-18      | 1       | Sphingomonas hengshuensis         | RefSeq     | Sphingomonas hengshuensis         | 1450   | 0           | HSW6         | rRNA            |         | lake                                                                                                                                                         | 1         | 1450     | FALSE   | ncbi_filtered | 1609977 |
| NR_145962_1_1450               | 1609977 | NR_145962       | Sphingomonas hengshuensis strain WHSC-8 16S ribosomal RNA, complete sequence                 | 20-04-17      | 4-Jan-18      | 2       | Sphingomonas hengshuensis         | RefSeq     | Sphingomonas hengshuensis         | 1490   | 0           | WHSC-8       | rRNA            |         | soil of Hengshu Lake                                                                                                                                         | 1         | 1490     | TRUE    | ncbi_filtered | 1609977 |
| NZ_CP010836_4632323_4633818    | 1609977 | NZ_CP010836     | Sphingomonas hengshuensis strain WHSC-8, complete genome                                     | 10-Apr-17     | 4-Jan-18      | 1       | Sphingomonas hengshuensis         | RefSeq     | Sphingomonas hengshuensis         | 1496   | 0           | WHSC-8       | genomic DNA     |         | soil of Hengshu Lake                                                                                                                                         | 4632323   | 4633818  | TRUE    | ncbi_filtered | 1609977 |
| NR_151947_1_1403               | 1610489 | NR_151947       | Corynebacterium pollitosisi strain VDS11 16S ribosomal RNA, partial sequence                 | 15-Nov-17     | 4-Jan-18      | 1       | Corynebacterium pollitosisi       | RefSeq     | Corynebacterium pollitosisi       | 1403   | 0           | VDS11        | rRNA            |         |                                                                                                                                                              | 1         | 1403     | TRUE    | ncbi_filtered | 1610489 |
| NZ_FXAR01000014_413_1942       | 1610489 | NZ_FXAR01000014 | Corynebacterium pollitosisi strain VDS, whole genome shotgun sequence                        | 1-May-17      | 4-Jan-18      | 1       | Corynebacterium pollitosisi       | WGS,RefSeq | Corynebacterium pollitosisi       | 1530   | 0           | VDS          | genomic DNA     |         |                                                                                                                                                              | 413       | 1942     | FALSE   | ncbi_filtered | 1610489 |
| NR_151905_1_1515               | 1612172 | NR_151905       | Vicinibacterium silvestris strain Ac_5_C6 16S ribosomal RNA, partial sequence                | 15-Nov-17     | 4-Jan-18      | 1       | Vicinibacterium silvestris        | RefSeq     | Vicinibacterium silvestris        | 1515   | 0           | Ac_5_C6      | rRNA            |         |                                                                                                                                                              | 1         | 1515     | TRUE    | ncbi_filtered | 1612172 |
| NR_137418_1_1405               | 1612308 | NR_137418       | Methylocapsa palsaarum strain NE2 16S ribosomal RNA, partial sequence                        | 24-Jun-16     | 4-Jan-18      | 1       | Methylocapsa palsaarum            | RefSeq     | Methylocapsa palsaarum            | 1405   | 0           | NE2          | rRNA            |         | subarctic peatland                                                                                                                                           | 1         | 1405     | TRUE    | ncbi_filtered | 1612308 |
| NZ_FOSN01000006_178480_179970  | 1612308 | NZ_FOSN01000006 | Methylocapsa palsaarum strain NE2, whole genome shotgun sequence                             | 29-Jul-17     | 4-Jan-18      | 1       | Methylocapsa palsaarum            | WGS,RefSeq | Methylocapsa palsaarum            | 1491   | 0           | NE2          | genomic DNA     |         |                                                                                                                                                              | 178480    | 179970   | TRUE    | ncbi_filtered | 1612308 |
| LN827532_1_1475                | 1622073 | LN827532        | Clostridium sp. mtS partial 16S rRNA gene, strain mtS                                        | 18-Apr-15     | 4-Jan-18      | 1       | Clostridium sp. mtS               | RefSeq     | Clostridium sp. mtS               | 1475   | 1           | mtS          | genomic DNA     |         | Human stool specimen                                                                                                                                         | 1         | 1475     | TRUE    | ncbi_filtered | 1622073 |
| NZ_LN849007_2029550_2031067    | 1622073 | NZ_LN849007     | Clostridium sp. mtS, whole genome shotgun sequence                                           | 10-Apr-17     | 4-Jan-18      | 1       | Clostridium sp. mtS               | WGS,RefSeq | Clostridium sp. mtS               | 1518   | 0           | mtS          | genomic DNA     |         |                                                                                                                                                              | 2029550   | 2031067  | TRUE    | ncbi_filtered | 1622073 |
| NR_151982_1_1383               | 1628085 | NR_151982       | Agathobaculum butyriciproducens strain SR79 16S ribosomal RNA, partial sequence              | 15-Nov-17     | 4-Jan-18      | 1       | Agathobaculum butyriciproducens   | RefSeq     | Agathobaculum butyriciproducens   | 1383   | 0           | SR79         | rRNA            |         | feces                                                                                                                                                        | 1         | 1383     | TRUE    | ncbi_filtered | 1628085 |
| NZ_CP012117_1038786_1040311    | 1630135 | NZ_CP012117     | Dermbacter vaginalis strain AD1-86, complete genome                                          | 13-Apr-17     | 4-Jan-18      | 1       | Dermbacter vaginalis              | RefSeq     | Dermbacter vaginalis              | 1526   | 0           | AD1-86       | genomic DNA     |         |                                                                                                                                                              | 1038786   | 1040311  | TRUE    | ncbi_filtered | 1630135 |
| LN828945_1_1490                | 1631743 | LN828945        | Brevibacterium sp. cv3 partial 16S rRNA gene, strain cv3                                     | 21-Mar-15     | 4-Jan-18      | 1       | Brevibacterium ihuae              | RefSeq     | Brevibacterium ihuae              | 1490   | 0           | cv3          | genomic DNA     |         | Human stool specimen                                                                                                                                         | 1         | 1490     | TRUE    | ncbi_filtered | 1631743 |
| NZ_FWZ01000002_1152373_1153905 | 1631743 | NZ_FWZ01000002  | Brevibacterium ihuae strain CV3, whole genome shotgun sequence                               | 10-Jan-18     | 12-Jan-18     | 1       | Brevibacterium ihuae              | WGS,RefSeq | Brevibacterium ihuae              | 1533   | 0           | CV3          | genomic DNA     |         |                                                                                                                                                              | 1152373   | 1153905  | TRUE    | ncbi_filtered | 1631743 |
| LN830268_1_1417                | 1631957 | LN830268        | Pelitestegia sp. DICM11-00060-1A partial 16S rRNA gene, isolate DICM11-00060-1A              | 5-Apr-17      | 4-Jan-18      | 1       | Pelitestegia sp.                  | RefSeq     | Pelitestegia sp.                  | 1417   | 0           | genomic DNA  | DICM11-00060-1A |         | tonsil of pig                                                                                                                                                | 1         | 1417     | FALSE   | ncbi_filtered | 1631957 |
| LN830269_1_1429                | 1631957 | LN830269        | Pelitestegia sp. ZTA10-00042-1C partial 16S rRNA gene, isolate ZTA10-00042-1C                | 5-Apr-17      | 4-Jan-18      | 1       | Pelitestegia sp.                  | RefSeq     | Pelitestegia sp.                  | 1429   | 0           | genomic DNA  | ZTA10-00042-1C  |         | tonsil of wild boar                                                                                                                                          | 1         | 1429     | FALSE   | ncbi_filtered | 1631957 |
| NR_145928_1_1424               | 1631957 | NR_145928       | Pelitestegia sp. strain 3340-03 16S ribosomal RNA, partial sequence                          | 14-Feb-17     | 4-Jan-18      | 1       | Pelitestegia sp.                  | RefSeq     | Pelitestegia sp.                  | 1424   | 0           | 3340-03      | rRNA            |         | tonsil of pig                                                                                                                                                | 1         | 1424     | TRUE    | ncbi_filtered | 1631957 |
| KR072685_1_1390                | 1640674 | KR072685        | Bacteroidales bacterium A7P-90m 16S ribosomal RNA gene, partial sequence                     | 8-Oct-16      | 4-Jan-18      | 1       | Williamwhitmania taraxaci         | RefSeq     | Williamwhitmania taraxaci         | 1390   | 2           | A7P-90m      | genomic DNA     |         | sample of water from 90m depth of Untersee Lake (Antarctica) collected during Antarctica 2008 Expedition, and kindly given for research by Richard B. Hoover | 1         | 1390     | TRUE    | ncbi_filtered | 1640674 |
| NZ_FMPY01000185_29_1562        | 1640674 | NZ_FMPY01000185 | Williamwhitmania taraxaci strain A7P-90m, whole genome shotgun sequence                      | 26-Sep-17     | 4-Jan-18      | 1       | Williamwhitmania taraxaci         | WGS,RefSeq | Williamwhitmania taraxaci         | 1534   | 0           | A7P-90m      | genomic DNA     |         |                                                                                                                                                              | 29        | 1562     | TRUE    | ncbi_filtered | 1640674 |
| KJ245707_1_1441                | 1643805 | KJ245707        | Peptococcus simiae strain M919-2/1 16S ribosomal RNA gene, partial sequence                  | 29-Sep-16     | 4-Jan-18      | 2       | Peptococcus simiae                | RefSeq     | Peptococcus simiae                | 1441   | 0           | M919-2/1     | genomic DNA     |         | stool sample                                                                                                                                                 | 1         | 1441     | FALSE   | ncbi_filtered | 1643805 |
| KJ245708_1_1488                | 1643805 | KJ245708        | Peptococcus simiae strain M916-1/1 16S ribosomal RNA gene, partial sequence                  | 29-Sep-16     | 4-Jan-18      | 1       | Peptococcus simiae                | RefSeq     | Peptococcus simiae                | 1488   | 0           | M916-1/1     | genomic DNA     |         | stool sample                                                                                                                                                 | 1         | 1488     | FALSE   | ncbi_filtered | 1643805 |
| NR_153710_1_1488               | 1643805 | NR_153710       | Peptococcus simiae strain M108 16S ribosomal RNA, partial sequence                           | 9-Feb-18      | 14-Feb-18     | 1       | Peptococcus simiae                | RefSeq     | Peptococcus simiae                | 1488   | 0           | M108         | rRNA            |         | stool sample                                                                                                                                                 | 1         | 1488     | TRUE    | ncbi_filtered | 1643805 |
| KR047732_1_1423                | 1646119 | KR047732        | Flavobacterium sp. JM-222 16S ribosomal RNA gene, partial sequence                           | 29-Apr-15     | 4-Jan-18      | 1       | Flavobacterium gossypii           | RefSeq     | Flavobacterium gossypii           | 1423   | 3           | JM-222       | genomic DNA     |         | plant                                                                                                                                                        | 1         | 1423     | TRUE    | ncbi_filtered | 1646119 |
| NR_149775_1_1390               | 1667168 | NR_149775       | Dermbacter jijuensis strain 32 16S ribosomal RNA, partial sequence                           | 15-Nov-17     | 4-Jan-18      | 1       | Dermbacter jijuensis              | RefSeq     | Dermbacter jijuensis              | 1390   | 0           | 32           | rRNA            |         | closed pus                                                                                                                                                   | 1         | 1390     | TRUE    | ncbi_filtered | 1667168 |
| KR611799_1_1480                | 1673609 | KR611799        | Acinetobacter albensis strain ANC 4875 16S ribosomal RNA gene, partial sequence              | 30-Dec-16     | 4-Jan-18      | 1       | Acinetobacter albensis            | RefSeq     | Acinetobacter albensis            | 1480   | 0           | ANC 4875     | genomic DNA     |         |                                                                                                                                                              | 1         | 1480     | FALSE   | ncbi_filtered | 1673609 |
| MF157597_1_1480                | 1673609 | MF157597        | Acinetobacter albensis strain T1-34 16S ribosomal RNA gene, partial sequence                 | 30-May-17     | 4-Jan-18      | 1       | Acinetobacter albensis            | RefSeq     | Acinetobacter albensis            | 1480   | 0           | T1-34        | genomic DNA     |         |                                                                                                                                                              | 1         | 1480     | FALSE   | ncbi_filtered | 1673609 |
| NZ_FMBK01000024_127_1713       | 1673609 | NZ_FMBK01000024 | Acinetobacter albensis strain ANC 4874, whole genome shotgun sequence                        | 29-Jul-17     | 4-Jan-18      | 1       | Acinetobacter albensis            | WGS,RefSeq | Acinetobacter albensis            | 1587   | 0           | ANC 4874     | genomic DNA     |         |                                                                                                                                                              | 127       | 1713     | TRUE    | ncbi_filtered | 1673609 |
| NZ_LN869527_3392_4930          | 1673721 | NZ_LN869527     | Intestinimonas massiliensis strain GD2, whole genome shotgun sequence                        | 21-Aug-17     | 4-Jan-18      | 1       | Intestinimonas massiliensis       | WGS,RefSeq | Intestinimonas massiliensis       | 1539   | 0           | GD2          | genomic DNA     |         |                                                                                                                                                              | 3392      | 4930     | TRUE    | ncbi_filtered | 1673721 |
| NR_144728_1_1514               | 1673722 | NR_144728       | Actinomyces ihumii strain SD1 16S ribosomal RNA, partial sequence                            | 18-Jan-17     | 4-Jan-18      | 2       | Actinomyces ihumii                | RefSeq     | Actinomyces ihumii                | 1514   | 4           | SD1          | rRNA            |         | feces                                                                                                                                                        | 1         | 1514     | TRUE    | ncbi_filtered | 1673722 |
| NZ_CZPX01000003_256127_257689  | 1673722 | NZ_CZPX01000003 | Actinomyces ihumii strain SD1, whole genome shotgun sequence                                 | 11-Apr-17     | 4-Jan-18      | 1       | Actinomyces ihumii                | WGS,RefSeq | Actinomyces ihumii                | 1563   | 0           | SD1          | genomic DNA     |         |                                                                                                                                                              | 256127    | 257689   | TRUE    | ncbi_filtered | 1673722 |
| NZ_CZPX01000003_3638_5200      | 1673722 | NZ_CZPX01000003 | Actinomyces ihumii strain SD1, whole genome shotgun sequence                                 | 11-Apr-17     | 4-Jan-18      | 1       | Actinomyces ihumii                | WGS,RefSeq | Actinomyces ihumii                | 1563   | 0           | SD1          | genomic DNA     |         |                                                                                                                                                              | 3638      | 5200     | TRUE    | ncbi_filtered | 1673722 |
| NZ_CVUJ01000002_307419_308954  | 1673724 | NZ_CVUJ01000002 | Neofamilia massiliensis strain SIT13, whole genome shotgun sequence                          | 11-Apr-17     | 4-Jan-18      | 1       | Neofamilia massiliensis           | WGS,RefSeq | Neofamilia massiliensis           | 1536   | 0           | SIT13        | genomic DNA     |         |                                                                                                                                                              | 307419    | 308954   | TRUE    | ncbi_filtered | 1673724 |
| NZ_CVUJ01000003_10_1545        | 1673724 | NZ_CVUJ01000003 | Neofamilia massiliensis strain SIT13, whole genome shotgun sequence                          | 11-Apr-17     | 4-Jan-18      | 1       | Neofamilia massiliensis           | WGS,RefSeq | Neofamilia massiliensis           | 1536   | 0           | SIT13        | genomic DNA     |         |                                                                                                                                                              | 10        | 1545     | TRUE    | ncbi_filtered | 1673724 |
| NZ_CVUJ01000003_976997_978132  | 1673724 | NZ_CVUJ01000003 | Neofamilia massiliensis strain SIT13, whole genome shotgun sequence                          | 11-Apr-17     | 4-Jan-18      | 1       | Neofamilia massiliensis           | WGS,RefSeq | Neofamilia massiliensis           | 1536   | 0           | SIT13        | genomic DNA     |         |                                                                                                                                                              | 976997    | 978132   | TRUE    | ncbi_filtered | 1673724 |
| KT230020_1_1482                | 1678728 | KT230020        | Flavobacterium sp. WV39 16S ribosomal RNA gene, partial sequence                             | 12-Jul-15     | 4-Jan-18      | 1       | Flavobacterium sp. WV39           | RefSeq     | Flavobacterium sp. WV39           | 1482   | 0           | WV39         | genomic DNA     |         |                                                                                                                                                              |           |          |         |               |         |

| seqname                        | tax_id  | accession       | description                                                                                                  | modified_date | download_date | version | num source | keywords                           | organism            | length | ambig_count | strain          | mol_type    | isolate                  | isolation_source                                 | seq_start | seq_stop | is_type | collection      | species |
|--------------------------------|---------|-----------------|--------------------------------------------------------------------------------------------------------------|---------------|---------------|---------|------------|------------------------------------|---------------------|--------|-------------|-----------------|-------------|--------------------------|--------------------------------------------------|-----------|----------|---------|-----------------|---------|
| 1360-22                        | 170337  |                 |                                                                                                              |               |               |         |            |                                    | Prevotella colorans | 900    | 0           |                 |             |                          |                                                  | 1         | 900      | TRUE    | fredricks_clone | 170337  |
| NR_151886_1_1491               | 170337  | NR_151886       | Prevotella colorans strain A1336 16S ribosomal RNA, partial sequence                                         | 15-Nov-17     | 4-Jan-18      | 1       | 1          | Prevotella colorans                | RefSeq              | 1491   | 0           | A1336           | rRNA        |                          | human wound                                      | 1         | 1491     | TRUE    | ncbi_filtered   | 170337  |
| LN881599_1_1470                | 1720192 | LN881599        | Corynebacterium sp. SN14 partial 16S rRNA gene, strain SN14                                                  | 24-Sep-15     | 4-Jan-18      | 1       | 1          | Corynebacterium bouchedurhonense   | WGS,RefSeq          | 1470   | 0           | SN14            | genomic DNA |                          | human stool specimen                             | 1         | 1470     | TRUE    | ncbi_filtered   | 1720192 |
| NZ_L1T546028_0592085_1093603   | 1720192 | NZ_L1T546028    | Corynebacterium bouchedurhonense strain SN14, whole genome shotgun sequence                                  | 7-Oct-17      | 4-Jan-18      | 1       | 1          | Corynebacterium bouchedurhonense   | WGS,RefSeq          | 1519   | 0           | SN14            | genomic DNA |                          |                                                  | 1092085   | 1093603  | TRUE    | ncbi_filtered   | 1720192 |
| NZ_L1T546028_441208_442726     | 1720192 | NZ_L1T546028    | Corynebacterium bouchedurhonense strain SN14, whole genome shotgun sequence                                  | 7-Oct-17      | 4-Jan-18      | 1       | 1          | Corynebacterium bouchedurhonense   | WGS,RefSeq          | 1519   | 0           | SN14            | genomic DNA |                          |                                                  | 441208    | 442726   | TRUE    | ncbi_filtered   | 1720192 |
| NR_144730_1_1490               | 1720199 | NR_144730       | Anaerococcus rubeifantus strain mt16 16S ribosomal RNA, partial sequence                                     | 30-Aug-17     | 4-Jan-18      | 1       | 1          | Anaerococcus rubeifantus           | RefSeq              | 1490   | 0           | mt16            | rRNA        |                          | feces                                            | 1         | 1490     | TRUE    | ncbi_filtered   | 1720199 |
| NR_1913016_432559_434088       | 1720199 | NR_1913016      | Anaerococcus rubeifantus isolate Anaerococcus rubeifantus, whole genome shotgun sequence                     | 22-Aug-17     | 4-Jan-18      | 1       | 1          | Anaerococcus rubeifantus           | WGS,RefSeq          | 1530   | 0           |                 | genomic DNA | Anaerococcus rubeifantus |                                                  | 432559    | 434088   | FALSE   | ncbi_filtered   | 1720199 |
| NR_144732_1_1488               | 1720298 | NR_144732       | Peptoniphilus phocensis strain SIT15 16S ribosomal RNA, partial sequence                                     | 18-Dec-16     | 4-Jan-18      | 1       | 1          | Peptoniphilus phocensis            | RefSeq              | 1488   | 0           | SIT15           | rRNA        |                          | feces                                            | 1         | 1488     | TRUE    | ncbi_filtered   | 1720298 |
| NZ_LN999809_769190_770723      | 1720298 | NZ_LN999809     | Peptoniphilus phocensis strain SIT15, whole genome shotgun sequence                                          | 18-Oct-17     | 4-Jan-18      | 1       | 1          | Peptoniphilus phocensis            | WGS,RefSeq          | 1534   | 0           | SIT15           | genomic DNA |                          |                                                  | 769190    | 770723   | TRUE    | ncbi_filtered   | 1720298 |
| LN881616_1_1486                | 1723382 | LN881616        | Peptoniphilaceae bacterium FC2 partial 16S rRNA gene, strain FC2                                             | 14-Jul-16     | 4-Jan-18      | 1       | 1          | Urinacoccus massiliensis           | RefSeq              | 1486   | 4           | FC2             | genomic DNA |                          | human urine sample                               | 1         | 1486     | TRUE    | ncbi_filtered   | 1723382 |
| NZ_L1T635492_146813_148343     | 1723382 | NZ_L1T635492    | Urinacoccus massiliensis strain FC2, whole genome shotgun sequence                                           | 10-Aug-17     | 4-Jan-18      | 1       | 1          | Urinacoccus massiliensis           | WGS,RefSeq          | 1581   | 0           | FC2             | genomic DNA |                          |                                                  | 146813    | 148343   | TRUE    | ncbi_filtered   | 1723382 |
| NZ_L1T635493_719119_720649     | 1723382 | NZ_L1T635493    | Urinacoccus massiliensis strain FC2, whole genome shotgun sequence                                           | 10-Aug-17     | 4-Jan-18      | 1       | 1          | Urinacoccus massiliensis           | WGS,RefSeq          | 1531   | 0           | FC2             | genomic DNA |                          |                                                  | 719119    | 720649   | TRUE    | ncbi_filtered   | 1723382 |
| LN881613_1_1499                | 1723384 | LN881613        | Fenollaria timonensis partial 16S rRNA gene, strain GDS                                                      | 10-Mar-17     | 4-Jan-18      | 1       | 1          | Fenollaria timonensis              | RefSeq              | 1499   | 0           | GDS             | genomic DNA |                          | human stool specimen                             | 1         | 1499     | FALSE   | ncbi_filtered   | 1723384 |
| NZ_LN898229_475509_477043      | 1723384 | NZ_LN898229     | Fenollaria timonensis strain GDS, whole genome shotgun sequence                                              | 10-Apr-17     | 4-Jan-18      | 1       | 1          | Fenollaria timonensis              | WGS,RefSeq          | 1535   | 0           | GDS             | genomic DNA |                          |                                                  | 475509    | 477043   | FALSE   | ncbi_filtered   | 1723384 |
| NZ_LN898229_593_2127           | 1723384 | NZ_LN898229     | Fenollaria timonensis strain GDS, whole genome shotgun sequence                                              | 10-Apr-17     | 4-Jan-18      | 1       | 1          | Fenollaria timonensis              | WGS,RefSeq          | 1535   | 0           | GDS             | genomic DNA |                          |                                                  | 593       | 2127     | FALSE   | ncbi_filtered   | 1723384 |
| NZ_LN898230_403735_405276      | 1723384 | NZ_LN898230     | Fenollaria timonensis strain GDS, whole genome shotgun sequence                                              | 10-Apr-17     | 4-Jan-18      | 1       | 1          | Fenollaria timonensis              | WGS,RefSeq          | 1542   | 0           | GDS             | genomic DNA |                          |                                                  | 403735    | 405276   | FALSE   | ncbi_filtered   | 1723384 |
| KR610521_1_1348                | 1737357 | KR610521        | Rhizobium sp. 166 16S ribosomal RNA gene, partial sequence                                                   | 20-Oct-15     | 4-Jan-18      | 1       | 1          | Rhizobium weximiae                 | RefSeq              | 1348   | 0           | 166             | genomic DNA |                          | root                                             | 1         | 1348     | TRUE    | ncbi_filtered   | 1737357 |
| LN892082_1_1493                | 1737424 | LN892082        | Blautia sp. GDB partial 16S rRNA gene, strain GDB                                                            | 16-Oct-15     | 4-Jan-18      | 1       | 1          | Blautia massiliensis               | RefSeq              | 1493   | 0           | GDB             | genomic DNA |                          | Human stool specimen                             | 1         | 1493     | FALSE   | ncbi_filtered   | 1737424 |
| NZ_LN913006_1985266_1986804    | 1737424 | NZ_LN913006     | Blautia sp. GDB genome assembly Blautia massiliensis1, scaffold scaffold00005, whole genome shotgun sequence | 7-Jan-16      | 4-Jan-18      | 1       | 1          | Blautia massiliensis               | WGS,RefSeq          | 1539   | 0           | GDB             | genomic DNA |                          |                                                  | 1985266   | 1986804  | FALSE   | ncbi_filtered   | 1737424 |
| NZ_LN913006_3510346_3511884    | 1737424 | NZ_LN913006     | Blautia sp. GDB genome assembly Blautia massiliensis1, scaffold scaffold00005, whole genome shotgun sequence | 7-Jan-16      | 4-Jan-18      | 1       | 1          | Blautia massiliensis               | WGS,RefSeq          | 1539   | 0           | GDB             | genomic DNA |                          |                                                  | 3510346   | 3511884  | FALSE   | ncbi_filtered   | 1737424 |
| NZ_LN913006_402758_40485       | 1737424 | NZ_LN913006     | Blautia sp. GDB genome assembly Blautia massiliensis1, scaffold scaffold00005, whole genome shotgun sequence | 7-Jan-16      | 4-Jan-18      | 1       | 1          | Blautia massiliensis               | WGS,RefSeq          | 1728   | 1           | GDB             | genomic DNA |                          |                                                  | 402758    | 40485    | FALSE   | ncbi_filtered   | 1737424 |
| NR_153728_1_1411               | 1737444 | NR_153728       | Novosphingobium bradum strain STM-24 16S ribosomal RNA, partial sequence                                     | 9-Feb-18      | 14-Feb-18     | 1       | 1          | Novosphingobium bradum             | RefSeq              | 1411   | 0           | STM-24          | rRNA        |                          | fresh water                                      | 1         | 1411     | TRUE    | ncbi_filtered   | 1737444 |
| LN906631_1_1483                | 1755098 | LN906631        | Brachy bacterium sp. MTS partial 16S rRNA gene, strain MTS                                                   | 7-Nov-16      | 4-Jan-18      | 1       | 1          | Brachy bacterium massiliense       | RefSeq              | 1483   | 1           | MTS             | genomic DNA |                          | Human stool specimen                             | 1         | 1483     | TRUE    | ncbi_filtered   | 1755098 |
| NZ_FXXB0100003_254915_256442   | 1755098 | NZ_FXXB0100003  | Brachy bacterium massiliense strain mT5, whole genome shotgun sequence                                       | 4-Jun-17      | 4-Jan-18      | 1       | 1          | Brachy bacterium massiliense       | WGS,RefSeq          | 1528   | 0           | mT5             | genomic DNA |                          |                                                  | 254915    | 256442   | TRUE    | ncbi_filtered   | 1755098 |
| NZ_FXXB0100005_284516_286043   | 1755098 | NZ_FXXB0100005  | Brachy bacterium massiliense strain mT5, whole genome shotgun sequence                                       | 4-Jun-17      | 4-Jan-18      | 1       | 1          | Brachy bacterium massiliense       | WGS,RefSeq          | 1528   | 0           | mT5             | genomic DNA |                          |                                                  | 284516    | 286043   | TRUE    | ncbi_filtered   | 1755098 |
| NR_146835_1_1348               | 1755241 | NR_146835       | Anaerococcus nagyae strain ENR0686 16S ribosomal RNA, partial sequence                                       | 20-Apr-17     | 4-Jan-18      | 1       | 1          | Anaerococcus nagyae                | RefSeq              | 1348   | 0           | ENR0686         | rRNA        |                          |                                                  | 1         | 1348     | TRUE    | ncbi_filtered   | 1755241 |
| NR_151915_1_1413               | 1762886 | NR_151915       | Sphingomonas faucium strain E62-3 16S ribosomal RNA, partial sequence                                        | 15-Nov-17     | 4-Jan-18      | 1       | 1          | Sphingomonas faucium               | RefSeq              | 1413   | 0           | E62-3           | rRNA        |                          | soil                                             | 1         | 1413     | TRUE    | ncbi_filtered   | 1762886 |
| KT309084_1_1409                | 1763773 | KT309084        | Sphingomonas hankyongensis strain W1-2-4 16S ribosomal RNA gene, partial sequence                            | 31-Oct-17     | 4-Jan-18      | 1       | 1          | Sphingomonas hankyongensis         | RefSeq              | 1409   | 0           | W1-2-4          | genomic DNA |                          | tap water                                        | 1         | 1409     | TRUE    | ncbi_filtered   | 1763773 |
| NR_152001_1_1404               | 1763816 | NR_152001       | Phenylobacterium aquaticum strain W2-3-4 16S ribosomal RNA, partial sequence                                 | 15-Nov-17     | 4-Jan-18      | 1       | 1          | Phenylobacterium aquaticum         | RefSeq              | 1404   | 0           | W2-3-4          | rRNA        |                          | reservoir of water purifier                      | 1         | 1404     | TRUE    | ncbi_filtered   | 1763816 |
| NR_149293_1_1451               | 1769291 | NR_149293       | Oceanivirga salmonicida strain AVG 2115 16S ribosomal RNA, partial sequence                                  | 2-Nov-17      | 4-Jan-18      | 1       | 1          | Oceanivirga salmonicida            | RefSeq              | 1451   | 0           | AVG 2115        | rRNA        |                          |                                                  | 1         | 1451     | TRUE    | ncbi_filtered   | 1769291 |
| NZ_LOQO1000092_3137_4671       | 1769291 | NZ_LOQO1000092  | Oceanivirga salmonicida strain AVG 2115 contig_19, whole genome shotgun sequence                             | 11-Apr-17     | 4-Jan-18      | 1       | 1          | Oceanivirga salmonicida            | WGS,RefSeq          | 1535   | 0           | AVG 2115        | genomic DNA |                          |                                                  | 3137      | 4671     | TRUE    | ncbi_filtered   | 1769291 |
| KU712044_1_1349                | 1775474 | KU712044        | Variororax guangxiensis strain NIHS150 16S ribosomal RNA gene, partial sequence                              | 29-May-16     | 4-Jan-18      | 1       | 1          | Variororax guangxiensis            | RefSeq              | 1343   | 0           | NIHS150         | genomic DNA |                          | surface of arthropod                             | 1         | 1343     | FALSE   | ncbi_filtered   | 1775474 |
| MGS16108_1_1383                | 1775474 | MGS16108        | Variororax guangxiensis strain HNG1 16S ribosomal RNA gene, partial sequence                                 | 20-Nov-17     | 4-Jan-18      | 1       | 1          | Variororax guangxiensis            | RefSeq              | 1389   | 0           | HNG1            | genomic DNA |                          | Endophytic Root Bacteria of Tripterium Willdotti | 1         | 1389     | FALSE   | ncbi_filtered   | 1775474 |
| NR_134828_1_1395               | 1775474 | NR_134828       | Variororax guangxiensis strain GXGD002 16S ribosomal RNA, partial sequence                                   | 15-Jan-16     | 4-Jan-18      | 1       | 1          | Variororax guangxiensis            | RefSeq              | 1395   | 0           | GXGD002         | rRNA        |                          |                                                  | 1         | 1395     | TRUE    | ncbi_filtered   | 1775474 |
| NR_146815_1_1476               | 1776381 | NR_146815       | Olegusella massiliensis strain KHD7 16S ribosomal RNA, partial sequence                                      | 20-Apr-17     | 4-Jan-18      | 1       | 1          | Olegusella massiliensis            | RefSeq              | 1476   | 0           | KHD7            | rRNA        |                          | vaginal swab                                     | 1         | 1476     | TRUE    | ncbi_filtered   | 1776381 |
| NZ_FLLS0100002_1019533_1021054 | 1776381 | NZ_FLLS0100002  | Olegusella massiliensis strain KHD7, whole genome shotgun sequence                                           | 18-Apr-17     | 4-Jan-18      | 1       | 1          | Olegusella massiliensis            | WGS,RefSeq          | 1522   | 0           | KHD7            | genomic DNA |                          |                                                  | 1019533   | 1021054  | TRUE    | ncbi_filtered   | 1776381 |
| NR_144740_1_1466               | 1776391 | NR_144740       | Romboutsia timonensis strain DR1 16S ribosomal RNA, partial sequence                                         | 16-Dec-16     | 4-Jan-18      | 1       | 1          | Romboutsia timonensis              | RefSeq              | 1466   | 0           | DR1             | rRNA        |                          | duodenal sample                                  | 1         | 1466     | TRUE    | ncbi_filtered   | 1776391 |
| NZ_L1T629846_97742_99248       | 1776391 | NZ_L1T629846    | Romboutsia timonensis strain Marseille-P326, whole genome shotgun sequence                                   | 13-Apr-17     | 4-Jan-18      | 1       | 1          | Romboutsia timonensis              | WGS,RefSeq          | 1507   | 0           | Marseille-P326  | genomic DNA |                          |                                                  | 97742     | 99248    | TRUE    | ncbi_filtered   | 1776391 |
| NR_144738_1_1487               | 1776392 | NR_144738       | Massiliomicrobiota timonensis strain SM16 16S ribosomal RNA, partial sequence                                | 16-Dec-16     | 4-Jan-18      | 1       | 1          | Massiliomicrobiota timonensis      | RefSeq              | 1487   | 0           | SM16            | rRNA        |                          | feces                                            | 1         | 1487     | TRUE    | ncbi_filtered   | 1776392 |
| NZ_FLQLO1000002_804663_806201  | 1776392 | NZ_FLQLO1000002 | Massiliomicrobiota timonensis strain SM16, whole genome shotgun sequence                                     | 14-Apr-17     | 4-Jan-18      | 1       | 1          | Massiliomicrobiota timonensis      | WGS,RefSeq          | 1539   | 0           | SM16            | genomic DNA |                          |                                                  | 804663    | 806201   | TRUE    | ncbi_filtered   | 1776392 |
| NZ_NFLJ0100007_44_1574         | 1776392 | NZ_NFLJ0100007  | Massiliomicrobiota timonensis strain An13 contig_71, whole genome shotgun sequence                           | 1-Jun-17      | 4-Jan-18      | 1       | 1          | Massiliomicrobiota timonensis      | WGS,RefSeq          | 1531   | 0           | An13            | genomic DNA |                          | caecum                                           | 44        | 1574     | FALSE   | ncbi_filtered   | 1776392 |
| NZ_MKKJ01000035_98938_100482   | 1776741 | NZ_MKKJ01000035 | Acinetobacter proteolyticus strain ANC 3849 Contig8, whole genome shotgun sequence                           | 6-Mar-17      | 4-Jan-18      | 1       | 1          | Acinetobacter proteolyticus        | WGS,RefSeq          | 1545   | 0           | ANC 3849        | genomic DNA |                          | leg wound                                        | 98938     | 100482   | FALSE   | ncbi_filtered   | 1776741 |
| NZ_PISJ01000028_239_1779       | 1776741 | NZ_PISJ01000028 | Acinetobacter proteolyticus strain ZP01AA contig_28, whole genome shotgun sequence                           | 14-Dec-17     | 4-Jan-18      | 1       | 1          | Acinetobacter proteolyticus        | WGS,RefSeq          | 1541   | 0           | ZP01AA          | genomic DNA |                          | spacecraft associated surface                    | 239       | 1779     | FALSE   | ncbi_filtered   | 1776741 |
| NR_149789_1_1454               | 1783360 | NR_149789       | Comamonas sediminis strain S3 16S ribosomal RNA, partial sequence                                            | 15-Nov-17     | 4-Jan-18      | 1       | 1          | Comamonas sediminis                | RefSeq              | 1454   | 0           | S3              | rRNA        |                          | Lagoon sediments                                 | 1         | 1454     | TRUE    | ncbi_filtered   | 1783360 |
| NR_153736_1_1415               | 1793872 | NR_153736       | Piscinibacterium candidicorallinum strain LYH-15 16S ribosomal RNA, partial sequence                         | 9-Feb-18      | 14-Feb-18     | 1       | 1          | Piscinibacterium candidicorallinum | RefSeq              | 1415   | 0           | LYH-15          | rRNA        |                          | fresh water                                      | 1         | 1415     | TRUE    | ncbi_filtered   | 1793872 |
| NR_144607_1_1378               | 1796615 | NR_144607       | Blautia caecimuris strain S18 16S ribosomal RNA, partial sequence                                            | 29-Nov-16     | 4-Jan-18      | 1       | 1          | Blautia caecimuris                 | RefSeq              | 1478   | 0           | S18             | rRNA        |                          | gut                                              | 1         | 1378     | TRUE    | ncbi_filtered   | 1796615 |
| LT160960_1_1495                | 1803177 | LT160960        | Arcanobacterium sp. 647 partial 16S rRNA gene, isolate 647                                                   | 4-Jan-17      | 4-Jan-18      | 1       | 1          | Arcanobacterium willhelmiae        | RefSeq              | 1395   | 0           | 647             | genomic DNA |                          |                                                  | 1         | 1495     | TRUE    | ncbi_filtered   | 1803177 |
| NR_152709_1_1432               | 1813468 | NR_152709       | Sphingomonas naphthae strain DKC-5-1 16S ribosomal RNA, partial sequence                                     | 19-Dec-17     | 4-Jan-18      | 1       | 1          | Sphingomonas naphthae              | RefSeq              | 1432   | 0           | DKC-5-1         | rRNA        |                          | oil contaminated soil                            | 1         | 1432     | TRUE    | ncbi_filtered   | 1813468 |
| NZ_L1T629730_365389_366942     | 1816695 | NZ_L1T629730    | Bacillus tuaregi strain Marseille-P2489, whole genome shotgun sequence                                       | 17-Apr-17     | 4-Jan-18      | 1       | 1          | Bacillus tuaregi                   | WGS,RefSeq          | 1554   | 0           | Marseille-P2489 | genomic DNA |                          |                                                  | 365389    | 366942   | FALSE   | ncbi_filtered   | 1816695 |
| NZ_L1T629731_3578089_3579644   | 1816695 | NZ_L1T629731    | Bacillus tuaregi strain Marseille-P2489, whole genome shotgun sequence                                       | 17-Apr-17     | 4-Jan-18      | 1       | 1          | Bacillus tuaregi                   | WGS,RefSeq          | 1556   | 0           | Marseille-P2489 | genomic DNA |                          |                                                  | 3578089   | 3579644  | FALSE   | ncbi_filtered   | 1816695 |
| NZ_L1T629731_4014857_4016409   | 1816695 | NZ_L1T629731    | Bacillus tuaregi strain Marseille-P2489, whole genome shotgun sequence                                       | 17-Apr-17     | 4-Jan-18      | 1       | 1          | Bacillus tuaregi                   | WGS,RefSeq          | 1553   | 0           |                 |             |                          |                                                  |           |          |         |                 |         |

| seqname                      | tax_id  | accession       | description                                                                                                                                                                                             | modified_date | download_date | version_num | source                             | keywords   | organism                           | length | ambig_count | strain          | mol_type    | isolate | isolation_source                        | seq_start | seq_stop | is_type | collection    | species |
|------------------------------|---------|-----------------|---------------------------------------------------------------------------------------------------------------------------------------------------------------------------------------------------------|---------------|---------------|-------------|------------------------------------|------------|------------------------------------|--------|-------------|-----------------|-------------|---------|-----------------------------------------|-----------|----------|---------|---------------|---------|
| KJ99451_1_1431               | 1539060 | KJ99451         | Cephalothrix komarekiana CCIB 3279 16S ribosomal RNA gene, partial sequence; 16S-23S ribosomal RNA intergenic spacer and tRNA-leu gene, complete sequence; and 23S ribosomal RNA gene, partial sequence | 5-May-16      | 4-Jan-18      | 1           | Cephalothrix komarekiana CCIB 3279 |            | Cephalothrix komarekiana CCIB 3279 | 1431   | 0           | CCIB 3279       | genomic DNA |         | freshwater aquarium                     | 1         | 1431     | FALSE   | ncbi_filtered | 184524  |
| KX06866_1_1484               | 1850242 | KX06866         | Massilia sp. PTW21 16S ribosomal RNA gene, partial sequence                                                                                                                                             | 24-May-16     | 4-Jan-18      | 1           | Massilia neulana                   |            | Massilia neulana                   | 1484   | 0           | PTW21           | genomic DNA |         | soil                                    | 1         | 1484     | TRUE    | ncbi_filtered | 1850242 |
| KO215153_1_1484              | 1850347 | KO215153        | Novosphingobium sp. SA925 16S ribosomal RNA gene, partial sequence                                                                                                                                      | 6-Sep-16      | 4-Jan-18      | 2           | Novosphingobium guangzhouense      |            | Novosphingobium guangzhouense      | 1484   | 0           | SA925           | genomic DNA |         | refinery soil                           | 1         | 1484     | TRUE    | ncbi_filtered | 1850347 |
| LYMM01000093_360_1855        | 1850347 | LYMM01000093    | Novosphingobium guangzhouense strain SA925 contig-123_78, whole genome shotgun sequence                                                                                                                 | 24-Jan-18     | 25-Jan-18     | 1           | Novosphingobium guangzhouense      | WGS        | Novosphingobium guangzhouense      | 1486   | 0           | SA925           | genomic DNA |         |                                         | 360       | 1855     | TRUE    | ncbi_filtered | 1850347 |
| LT576385_1_1466              | 1852361 | LT576385        | Actinomyces sp. Marseille-P2825 partial 16S rRNA gene, strain Marseille-P2825                                                                                                                           | 8-Mar-17      | 4-Jan-18      | 2           | Actinomyces sp. Marseille-P2825    |            | Actinomyces sp. Marseille-P2825    | 1466   | 1           | Marseille-P2825 | genomic DNA |         | stomach                                 | 1         | 1466     | TRUE    | ncbi_filtered | 1852361 |
| LT576389_1_1469              | 1852365 | LT576389        | Fusobacterium sp. Marseille-P2749 partial 16S rRNA gene, strain Marseille-P2749                                                                                                                         | 26-May-16     | 4-Jan-18      | 1           | Fusobacterium massiliense          |            | Fusobacterium massiliense          | 1469   | 0           | Marseille-P2749 | genomic DNA |         | stool                                   | 1         | 1469     | TRUE    | ncbi_filtered | 1852365 |
| NZ_L17608324_6_1541          | 1852365 | NZ_L17608324    | Fusobacterium massiliense strain Marseille-P2749, whole genome shotgun sequence                                                                                                                         | 13-Apr-17     | 4-Jan-18      | 1           | Fusobacterium massiliense          | WGS,RefSeq | Fusobacterium massiliense          | 1536   | 0           | Marseille-P2749 | genomic DNA |         |                                         | 6         | 1541     | TRUE    | ncbi_filtered | 1852365 |
| NZ_L17608325_257346_258891   | 1852365 | NZ_L17608325    | Fusobacterium massiliense strain Marseille-P2749, whole genome shotgun sequence                                                                                                                         | 13-Apr-17     | 4-Jan-18      | 1           | Fusobacterium massiliense          | WGS,RefSeq | Fusobacterium massiliense          | 1546   | 0           | Marseille-P2749 | genomic DNA |         |                                         | 257346    | 258891   | TRUE    | ncbi_filtered | 1852365 |
| NZ_L17608326_260914_262459   | 1852365 | NZ_L17608326    | Fusobacterium massiliense strain Marseille-P2749, whole genome shotgun sequence                                                                                                                         | 13-Apr-17     | 25-Jan-18     | 1           | Fusobacterium massiliense          | WGS,RefSeq | Fusobacterium massiliense          | 1546   | 0           | Marseille-P2749 | genomic DNA |         |                                         | 260914    | 262459   | TRUE    | ncbi_filtered | 1852365 |
| NR_144749_1_1479             | 1852367 | NR_144749       | Ithubacter massiliensis strain Marseille-P2843 16S ribosomal RNA, partial sequence                                                                                                                      | 16-Dec-16     | 4-Jan-18      | 1           | Ithubacter massiliensis            | RefSeq     | Ithubacter massiliensis            | 1479   | 0           | Marseille-P2843 | rRNA        |         | feces                                   | 1         | 1479     | TRUE    | ncbi_filtered | 1852367 |
| LT576393_1_1492              | 1852369 | LT576393        | Oscillospira bacterium Marseille-P2840 partial 16S rRNA gene, strain Marseille-P2840                                                                                                                    | 26-May-16     | 4-Jan-18      | 1           | Marselliibacter massiliensis       |            | Marselliibacter massiliensis       | 1492   | 2           | Marseille-P2840 | genomic DNA |         | stool                                   | 1         | 1492     | TRUE    | ncbi_filtered | 1852369 |
| NZ_L17629844_288713_290257   | 1852370 | NZ_L17629844    | Prevotellamassilia timonensis strain Marseille-P2831, whole genome shotgun sequence                                                                                                                     | 13-Apr-17     | 4-Jan-18      | 1           | Prevotellamassilia timonensis      | WGS,RefSeq | Prevotellamassilia timonensis      | 1545   | 0           | Marseille-P2831 | genomic DNA |         |                                         | 288713    | 290257   | TRUE    | ncbi_filtered | 1852370 |
| LT576398_1_1505              | 1852374 | LT576398        | Ezakiella sp. Marseille-P2951 partial 16S rRNA gene, strain Marseille-P2951                                                                                                                             | 26-May-16     | 4-Jan-18      | 1           | Ezakiella massiliensis             |            | Ezakiella massiliensis             | 1505   | 1           | Marseille-P2951 | genomic DNA |         |                                         | 1         | 1505     | TRUE    | ncbi_filtered | 1852374 |
| NZ_L17635475_1387303_1388849 | 1852374 | NZ_L17635475    | Ezakiella sp. Marseille-P2951 strain Marseille-P2951T genome assembly, chromosome: contig00001                                                                                                          | 14-Apr-17     | 4-Jan-18      | 1           | Ezakiella massiliensis             | RefSeq     | Ezakiella massiliensis             | 1547   | 0           | Marseille-P2951 | genomic DNA |         |                                         | 1387303   | 1388849  | TRUE    | ncbi_filtered | 1852374 |
| NZ_L17635475_1740234_1741780 | 1852374 | NZ_L17635475    | Ezakiella sp. Marseille-P2951 strain Marseille-P2951T genome assembly, chromosome: contig00001                                                                                                          | 14-Apr-17     | 4-Jan-18      | 1           | Ezakiella massiliensis             | RefSeq     | Ezakiella massiliensis             | 1547   | 0           | Marseille-P2951 | genomic DNA |         |                                         | 1740234   | 1741780  | TRUE    | ncbi_filtered | 1852374 |
| NZ_L17707419_38_1586         | 1852376 | NZ_L17707419    | Actinomyces sp. Marseille-P2818, whole genome shotgun sequence                                                                                                                                          | 17-Apr-17     | 4-Jan-18      | 1           | Actinomyces sp. Marseille-P2818    | WGS,RefSeq | Actinomyces sp. Marseille-P2818    | 1549   | 0           | Marseille-P2818 | genomic DNA |         |                                         | 38        | 1586     | TRUE    | ncbi_filtered | 1852376 |
| LT576401_1_1506              | 1852377 | LT576401        | Actinomyces sp. Marseille-P2985 partial 16S rRNA gene, strain Marseille-P2985                                                                                                                           | 26-May-16     | 4-Jan-18      | 1           | Actinomyces sp. Marseille-P2985    |            | Actinomyces sp. Marseille-P2985    | 1506   | 0           | Marseille-P2985 | genomic DNA |         | sputum                                  | 1         | 1506     | TRUE    | ncbi_filtered | 1852377 |
| LT576404_1_1480              | 1852380 | LT576404        | Corynebacterium sp. Marseille-P2799 partial 16S rRNA gene, strain Marseille-P2799                                                                                                                       | 26-May-16     | 4-Jan-18      | 1           | Corynebacterium urinaepleomorphen  |            | Corynebacterium urinaepleomorphen  | 1480   | 7           | Marseille-P2799 | genomic DNA |         | Duodenum                                | 1         | 1480     | TRUE    | ncbi_filtered | 1852380 |
| NZ_L176412_1_1475            | 1852388 | LT576412        | Leptotrichia sp. Marseille-P3007 partial 16S rRNA gene, strain Marseille-P3007                                                                                                                          | 26-May-16     | 4-Jan-18      | 1           | Leptotrichia sp. Marseille-P3007   |            | Leptotrichia sp. Marseille-P3007   | 1475   | 0           | Marseille-P3007 | genomic DNA |         | Sputum                                  | 1         | 1475     | TRUE    | ncbi_filtered | 1852388 |
| NZ_FNV201000001_24_1551      | 1852388 | NZ_FNV20100001  | Leptotrichia sp. Marseille-P3007, whole genome shotgun sequence                                                                                                                                         | 13-Apr-17     | 4-Jan-18      | 1           | Leptotrichia sp. Marseille-P3007   | WGS,RefSeq | Leptotrichia sp. Marseille-P3007   | 1528   | 0           | Marseille-P3007 | genomic DNA |         |                                         | 24        | 1551     | TRUE    | ncbi_filtered | 1852388 |
| NZ_FNV201000002_24_1551      | 1852388 | NZ_FNV20100002  | Leptotrichia sp. Marseille-P3007, whole genome shotgun sequence                                                                                                                                         | 13-Apr-17     | 4-Jan-18      | 1           | Leptotrichia sp. Marseille-P3007   | WGS,RefSeq | Leptotrichia sp. Marseille-P3007   | 1528   | 0           | Marseille-P3007 | genomic DNA |         |                                         | 24        | 1551     | TRUE    | ncbi_filtered | 1852388 |
| LT576413_1_1492              | 1852389 | LT576413        | Peptoniphilus sp. Marseille-P2932 partial 16S rRNA gene, strain Marseille-P2932                                                                                                                         | 26-May-16     | 4-Jan-18      | 1           | Peptoniphilus sp. Marseille-P2932  |            | Peptoniphilus sp. Marseille-P2932  | 1492   | 5           | Marseille-P2932 | genomic DNA |         | Duodenum                                | 1         | 1492     | TRUE    | ncbi_filtered | 1852389 |
| NZ_L176414_1_1481            | 1852390 | LT576414        | Corynebacterium sp. Marseille-P2948 partial 16S rRNA gene, strain Marseille-P2948                                                                                                                       | 26-May-16     | 4-Jan-18      | 1           | Corynebacterium fourrieri          |            | Corynebacterium fourrieri          | 1481   | 6           | Marseille-P2948 | genomic DNA |         | vagina                                  | 1         | 1481     | TRUE    | ncbi_filtered | 1852390 |
| NZ_L17839618_798542_800608   | 1852390 | NZ_L17839618    | Corynebacterium fourrieri strain Marseille-P2948, whole genome shotgun sequence                                                                                                                         | 18-May-17     | 4-Jan-18      | 1           | Corynebacterium fourrieri          | WGS,RefSeq | Corynebacterium fourrieri          | 1527   | 0           | Marseille-P2948 | genomic DNA |         |                                         | 798542    | 800608   | TRUE    | ncbi_filtered | 1852390 |
| KX129819_1_1441              | 1854500 | KX129819        | Roseomonas nepalensis strain G-3-5 16S ribosomal RNA gene, partial sequence                                                                                                                             | 7-Jul-17      | 4-Jan-18      | 1           | Roseomonas nepalensis              |            | Roseomonas nepalensis              | 1441   | 0           | G-3-5           | genomic DNA |         | oil-contaminated soil                   | 1         | 1441     | TRUE    | ncbi_filtered | 1854500 |
| KX352244_1_1390              | 1856850 | KX352244        | Rhizobium sp. MIM27 16S ribosomal RNA gene, partial sequence                                                                                                                                            | 20-Sep-16     | 4-Jan-18      | 1           | Rhizobium arnaeae                  |            | Rhizobium arnaeae                  | 1390   | 0           | MIM27           | genomic DNA |         | biological soil crusts                  | 1         | 1390     | TRUE    | ncbi_filtered | 1856850 |
| NZ_MOOV01000001_449_1943     | 1856850 | NZ_MOOV01000001 | Rhizobium arnaeae strain MIM27 scaffold23, whole genome shotgun sequence                                                                                                                                | 16-Apr-17     | 4-Jan-18      | 1           | Rhizobium arnaeae                  | WGS,RefSeq | Rhizobium arnaeae                  | 1495   | 0           | MIM27           | genomic DNA |         | biological soil crusts                  | 449       | 1943     | TRUE    | ncbi_filtered | 1856850 |
| KM507608_1_1475              | 1857024 | KM507608        | Brevibacterium sp. FXJ8.128 16S ribosomal RNA gene, partial sequence                                                                                                                                    | 27-Jun-16     | 4-Jan-18      | 2           | Brevibacterium sediminis           |            | Brevibacterium sediminis           | 1475   | 0           | FXJ8.128        | genomic DNA |         | Southwest Indian Ocean deep sea samples | 1         | 1475     | FALSE   | ncbi_filtered | 1857024 |
| KX356314_1_1491              | 1857024 | KX356314        | Brevibacterium sp. CGMCC 1.15473 16S ribosomal RNA gene, partial sequence                                                                                                                               | 12-Jun-16     | 4-Jan-18      | 1           | Brevibacterium sediminis           |            | Brevibacterium sediminis           | 1491   | 0           | CGMCC 1.15473   | genomic DNA |         | Southwest Indian Ridge deep sediment    | 1         | 1491     | FALSE   | ncbi_filtered | 1857024 |
| MF928324_1_1348              | 1857024 | MF928324        | Brevibacterium sediminis strain AW28 16S ribosomal RNA gene, partial sequence                                                                                                                           | 16-Sep-17     | 4-Jan-18      | 1           | Brevibacterium sediminis           |            | Brevibacterium sediminis           | 1348   | 0           | AW28            | genomic DNA |         | marine sediment                         | 1         | 1348     | FALSE   | ncbi_filtered | 1857024 |
| MG780251_1_1396              | 1857024 | MG780251        | Brevibacterium sediminis strain AB-591 16S ribosomal RNA gene, partial sequence                                                                                                                         | 17-Jan-18     | 22-Jan-18     | 1           | Brevibacterium sediminis           |            | Brevibacterium sediminis           | 1396   | 0           | AB-591          | genomic DNA |         | endophyte Camellia sp.                  | 1         | 1396     | FALSE   | ncbi_filtered | 1857024 |
| NR_147392_1_1491             | 1870984 | NR_147392       | Anaerococcus mediterraneus strain Marseille-P2765 16S ribosomal RNA, partial sequence                                                                                                                   | 17-May-17     | 4-Jan-18      | 1           | Anaerococcus mediterraneus         | RefSeq     | Anaerococcus mediterraneus         | 1491   | 13          | Marseille-P2765 | rRNA        |         | vagina                                  | 1         | 1491     | TRUE    | ncbi_filtered | 1870984 |
| NZ_L17635772_1_1434          | 1870984 | NZ_L17635772    | Anaerococcus sp. Marseille-P2765 strain Marseille-P2765 genome assembly, chromosome: contig00001                                                                                                        | 14-Apr-17     | 4-Jan-18      | 1           | Anaerococcus mediterraneus         | RefSeq     | Anaerococcus mediterraneus         | 1434   | 0           | Marseille-P2765 | genomic DNA |         |                                         | 1         | 1434     | TRUE    | ncbi_filtered | 1870984 |
| NZ_L17635772_438518_440051   | 1870984 | NZ_L17635772    | Anaerococcus sp. Marseille-P2765 strain Marseille-P2765 genome assembly, chromosome: contig00001                                                                                                        | 14-Apr-17     | 4-Jan-18      | 1           | Anaerococcus mediterraneus         | RefSeq     | Anaerococcus mediterraneus         | 1534   | 0           | Marseille-P2765 | genomic DNA |         |                                         | 438518    | 440051   | TRUE    | ncbi_filtered | 1870984 |
| NR_147375_1_1487             | 1870986 | NR_147375       | Anaerococcus sp. Marseille-P2765 strain Marseille-P2765 genome assembly, chromosome: contig00001                                                                                                        | 14-Apr-17     | 4-Jan-18      | 1           | Anaerococcus mediterraneus         | RefSeq     | Anaerococcus mediterraneus         | 1535   | 0           | Marseille-P2765 | genomic DNA |         |                                         | 902589    | 904123   | TRUE    | ncbi_filtered | 1870986 |
| NR_147375_1_1487             | 1870986 | NR_147375       | Colidextribacter massiliensis strain Marseille-P3083 16S ribosomal RNA, partial sequence                                                                                                                | 17-May-17     | 4-Jan-18      | 1           | Colidextribacter massiliensis      | RefSeq     | Colidextribacter massiliensis      | 1487   | 4           | Marseille-P3083 | rRNA        |         | duodenum                                | 1         | 1487     | TRUE    | ncbi_filtered | 1870986 |
| NR_147394_1_1495             | 1870994 | NR_147394       | Urmittella timonensis strain Marseille-P2918 16S ribosomal RNA, partial sequence                                                                                                                        | 17-May-17     | 4-Jan-18      | 1           | Urmittella timonensis              | RefSeq     | Urmittella timonensis              | 1495   | 1           | Marseille-P2918 | rRNA        |         | stool                                   | 1         | 1495     | TRUE    | ncbi_filtered | 1870994 |
| NZ_FLQW01000003_276_1826     | 1870994 | NZ_FLQW01000003 | Urmittella timonensis strain Marseille-P2918, whole genome shotgun sequence                                                                                                                             | 22-Mar-17     | 4-Jan-18      | 1           | Urmittella timonensis              | WGS,RefSeq | Urmittella timonensis              | 1551   | 0           | Marseille-P2918 | genomic DNA |         |                                         | 276       | 1826     | TRUE    | ncbi_filtered | 1870994 |
| NZ_L17706966_1333_3034       | 1870995 | NZ_L17706966    | Actinotignum timonense strain type strain: Marseille-P2803, whole genome shotgun sequence                                                                                                               | 31-May-17     | 4-Jan-18      | 1           | Actinotignum timonense             | WGS,RefSeq | Actinotignum timonense             | 1702   | 0           | type strain     | genomic DNA |         | Marseille-P2803                         | 1333      | 3034     | TRUE    | ncbi_filtered | 1870995 |
| NZ_L17706966_1642119_1643668 | 1870995 | NZ_L17706966    | Actinotignum timonense strain type strain: Marseille-P2803, whole genome shotgun sequence                                                                                                               | 31-May-17     | 4-Jan-18      | 1           | Actinotignum timonense             | WGS,RefSeq | Actinotignum timonense             | 1550   | 0           | type strain     | genomic DNA |         | Marseille-P2803                         | 1642119   | 1643668  | TRUE    | ncbi_filtered | 1870995 |
| PKM010000020_786_2331        | 1870995 | PKM010000020    | Actinotignum timonense strain UMB0063                                                                                                                                                                   | 31-Dec-17     | 4-Jan-18      | 1           | Actinotignum timonense             | WGS        | Actinotignum timonense             | 1546   | 0           | UMB0063         | genomic DNA |         |                                         | 786       | 2331     | FALSE   | ncbi_filtered | 1870995 |
| PKM010000020_1_1461          | 1870995 | PKM010000020    | Actinotignum timonense strain UMB0086                                                                                                                                                                   | 31-Dec-17     | 4-Jan-18      | 1           | Actinotignum timonense             | WGS        | Actinotignum timonense             | 1461   | 0           | UMB0086         | genomic DNA |         |                                         | 1         | 1461     | FALSE   | ncbi_filtered | 1870995 |
| NZ_FNV01000001_371049_372573 | 1870997 | NZ_FNV01000001  | Ileibacterium massiliense strain Marseille-P3115, whole genome shotgun sequence                                                                                                                         | 26-Apr-17     | 4-Jan-18      | 1           | Ileibacterium massiliense          | WGS,RefSeq | Ileibacterium massiliense          | 1525   | 0           | Marseille-P3115 | genomic DNA |         |                                         | 371049    | 372573   | TRUE    | ncbi_filtered | 1870997 |
| NR_147377_1_1496             | 1870999 | NR_147377       | Metaprevotella massiliensis strain Marseille-P3114 16S ribosomal RNA, partial sequence                                                                                                                  | 17-May-17     | 4-Jan-18      | 1           | Metaprevotella massiliensis        | RefSeq     | Metaprevotella massiliensis        | 1496   | 3           | Marseille-P3114 | rRNA        |         | duodenum                                | 1         | 1496     | TRUE    | ncbi_filtered | 1870999 |
| LT598561_1_1494              | 1871001 | LT598561        | Kallipogon sp. Marseille-P2746 partial 16S rRNA gene, strain Marseille-P2746                                                                                                                            | 8-Mar-17      | 4-Jan-18      | 1           | Khoudiadiopla massiliensis         |            | Khoudiadiopla massiliensis         | 1494   | 2           | Marseille-P2746 | genomic DNA |         | vagina                                  | 1         | 1494     | TRUE    | ncbi_filtered | 1871001 |
| NZ_OKQ501000008_59_1596      | 1871001 | NZ_OKQ501000008 | Khoudiadiopla massiliensis strain Marseille-P2746, whole genome shotgun sequence                                                                                                                        | 4-Mar-18      | 12-Mar-18     | 1           | Khoudiadiopla massiliensis         | WGS,RefSeq | Khoudiadiopla massiliensis         | 1494   | 0           | Marseille-P2746 | genomic DNA |         |                                         | 59        | 1596     | TRUE    | ncbi_filtered | 1871001 |
| NZ_L17632434_74_1618         | 1871014 | NZ_L17632434    | Arcanobacterium urinimassiliense strain Marseille-P2346, whole genome shotgun sequence                                                                                                                  | 17-Apr-17     | 4-Jan-18      | 1           | Arcanobacterium urinimassiliense   | WGS,RefSeq | Arcanobacterium urinimassiliense   | 1548   | 0           | Marseille-P2346 | genomic DNA |         |                                         | 74        | 1618     | TRUE    | ncbi_filtered | 1871014 |
| LT598577_1_1491              | 1871017 | LT598577        | Peptoniphilus urinimassiliensis strain Marseille-P3195 16S rRNA gene, strain Marseille-P3195                                                                                                            | 8-Mar-17      | 4-Jan-18      | 1           | Peptoniphilus urinimassiliensis    |            | Peptoniphilus urinimassiliensis    | 1491   | 0           | Marseille-P3195 | genomic DNA |         | urine                                   | 1         | 1491     | TRUE    | ncbi_filtered | 1871017 |
| MF547661_1_1450              | 187133  |                 |                                                                                                                                                                                                         |               |               |             |                                    |            |                                    |        |             |                 |             |         |                                         |           |          |         |               |         |

| seqname                        | tax_id   | accession       | description                                                                                   | modified_date | download_date | version | num | source                                                                      | keywords   | organism                                 | length | ambig_count | strain                                         | mol_type    | isolate     | isolation_source                                                       | seq_start | seq_stop | is_type | collection        | species  |
|--------------------------------|----------|-----------------|-----------------------------------------------------------------------------------------------|---------------|---------------|---------|-----|-----------------------------------------------------------------------------|------------|------------------------------------------|--------|-------------|------------------------------------------------|-------------|-------------|------------------------------------------------------------------------|-----------|----------|---------|-------------------|----------|
| NZ_OESQ0100001_2353956_2353493 | 1926283  | NZ_OESQ0100001  | Lachnospirillum edouardi strain Marseille-P3397, whole genome shotgun sequence                | 11-Jan-18     | 12-Jan-18     | 1       |     | Lachnospirillum edouardi                                                    | WGS,RefSeq | Lachnospirillum edouardi                 | 1538   | 0           | Marseille-P3397                                | genomic DNA |             | stool                                                                  | 2353956   | 2353493  | TRUE    | ncbi_filtered     | 1926283  |
| NZ_OESQ0100001_2510814_2512351 | 1926283  | NZ_OESQ0100001  | Lachnospirillum edouardi strain Marseille-P3397, whole genome shotgun sequence                | 11-Jan-18     | 12-Jan-18     | 1       |     | Lachnospirillum edouardi                                                    | WGS,RefSeq | Lachnospirillum edouardi                 | 1538   | 0           | Marseille-P3397                                | genomic DNA |             | stool                                                                  | 2510814   | 2512351  | TRUE    | ncbi_filtered     | 1926283  |
| LT714169_1_1455                | 1936060  | LT714169        | Bacillus sp. Marseille-P3604 partial 16S rRNA gene, strain Marseille-P3604                    | 19-Jan-17     | 4-Jan-18      | 1       |     | Bacillus caecae                                                             |            | Bacillus caecae                          | 1455   | 0           | Marseille-P3604                                | genomic DNA |             | Stool                                                                  | 1         | 1455     | TRUE    | ncbi_filtered     | 1936060  |
| LT714171_1_1483                | 1936062  | LT714171        | Veillonella sp. Marseille-P3594 partial 16S rRNA gene, strain Marseille-P3594                 | 19-Jan-17     | 4-Jan-18      | 1       |     | Veillonella massiliensis                                                    |            | Veillonella massiliensis                 | 1483   | 7           | Marseille-P3594                                | genomic DNA |             | Stool                                                                  | 1         | 1483     | TRUE    | ncbi_filtered     | 1936062  |
| NR_153730_1_1397               | 1945662  | NR_153730       | Paracoccus contaminans strain WPA02 16S ribosomal RNA, partial sequence                       | 9-Feb-18      | 14-Feb-18     | 1       |     | Paracoccus contaminans                                                      | RefSeq     | Paracoccus contaminans                   | 1397   | 0           | WPA02                                          | rRNA        |             | contaminant of an axenic E. coli culture in 7% NaCl, RKI Werraingroede | 1         | 1397     | TRUE    | ncbi_filtered     | 1945662  |
| NZ_CP020612_1166313_1167775    | 1945662  | NZ_CP020612     | Paracoccus contaminans strain RKI 16-01929T-LMG 29738T-CCM 8701T-CIP 111112T, complete genome | 26-Apr-17     | 4-Jan-18      | 1       |     | Paracoccus contaminans                                                      | RefSeq     | Paracoccus contaminans                   | 1463   | 0           | RKI 16-01929T-LMG 29738T-CCM 8701T-CIP 111112T | genomic DNA |             | water                                                                  | 1166313   | 1167775  | TRUE    | ncbi_filtered     | 1945662  |
| NR_145944_1_1492               | 1955250  | NR_145944       | Novosphingobium endophyticum strain EGI 60015 16S ribosomal RNA, partial sequence             | 28-Aug-17     | 4-Jan-18      | 2       |     | Novosphingobium endophyticum                                                | RefSeq     | Novosphingobium endophyticum             | 1492   | 0           | EGI 60015                                      | rRNA        |             |                                                                        | 1         | 1492     | TRUE    | ncbi_filtered     | 1955250  |
| LT797538_1_1502                | 1964383  | LT797538        | Varibaculum timonense strain Marseille-P3369                                                  | 4-Mar-17      | 4-Jan-18      | 1       |     | Varibaculum timonense                                                       |            | Varibaculum timonense                    | 1502   | 0           | Marseille-P3369                                | genomic DNA |             | stool                                                                  | 1         | 1502     | TRUE    | ncbi_filtered     | 1964383  |
| NZ_L1827020_1_1531             | 1964383  | NZ_L1827020     | Varibaculum timonense strain Marseille-P3369, whole genome shotgun sequence                   | 17-Apr-17     | 4-Jan-18      | 1       |     | Varibaculum timonense                                                       | WGS,RefSeq | Varibaculum timonense                    | 1531   | 0           | Marseille-P3369                                | genomic DNA |             |                                                                        | 1         | 1531     | TRUE    | ncbi_filtered     | 1964383  |
| LC221816_1_1465                | 1968274  | LC221816        | Spirosoma sp. 15B-5 gene for 16S ribosomal RNA, partial sequence                              | 15-Mar-17     | 4-Jan-18      | 1       |     | Spirosoma koreense                                                          |            | Spirosoma koreense                       | 1465   | 0           | 15B-5                                          | genomic DNA |             | soil                                                                   | 1         | 1465     | TRUE    | ncbi_filtered     | 1968274  |
| KY922827_1_1487                | 1978412  | KY922827        | Sediminibacterium sp. SYL130 16S ribosomal RNA gene, partial sequence                         | 16-Apr-17     | 4-Jan-18      | 1       |     | Sediminibacterium roseum                                                    |            | Sediminibacterium roseum                 | 1487   | 0           | SYL130                                         | genomic DNA |             |                                                                        | 1         | 1487     | TRUE    | ncbi_filtered     | 1978412  |
| NZ_NGU201000036_391_1920       | 1979527  | NZ_NGU201000036 | Corynebacterium kefirresidentii strain S8                                                     | 19-Sep-17     | 4-Jan-18      | 1       |     | Corynebacterium kefirresidentii                                             | WGS,RefSeq | Corynebacterium kefirresidentii          | 1530   | 0           | S8                                             | genomic DNA |             | kefir                                                                  | 391       | 1920     | TRUE    | ncbi_filtered     | 1979527  |
| KX352248_1_1376                | 1980020  | KX352248        | Candidatus Rickettsia leptotrombidium 16S ribosomal RNA gene, partial sequence                | 23-Apr-17     | 4-Jan-18      | 1       |     | Candidatus Rickettsia leptotrombidium                                       |            | Candidatus Rickettsia leptotrombidium    | 1376   | 0           |                                                | genomic DNA |             | hilly fields                                                           | 1         | 1376     | FALSE   | ncbi_filtered     | 1980020  |
| LC270126_1_1478                | 2003188  | LC270126        | Atopobacteriaceae bacterium 2CBEHG3 gene for 16S ribosomal RNA, partial sequence              | 8-Jul-17      | 4-Jan-18      | 1       |     | Atopobacteriaceae bacterium 2CBEHG3                                         |            | Atopobacteriaceae bacterium 2CBEHG3      | 1478   | 0           | 2CBEHG3                                        | genomic DNA |             | fecal sample                                                           | 1         | 1478     | FALSE   | ncbi_filtered     | 2003188  |
| MF576260_1_1395                | 2026255  | MF576260        | Corynebacterium sp. NBT06-6 16S ribosomal RNA gene, partial sequence                          | 11-Sep-17     | 4-Jan-18      | 1       |     | Corynebacterium sp. NBT06-6                                                 |            | Corynebacterium sp. NBT06-6              | 1395   | 1           | NBT06-6                                        | genomic DNA |             | deep sea water                                                         | 1         | 1395     | FALSE   | ncbi_filtered     | 2026255  |
| NZ_NMQ001000058_20_1410        | 2026255  | NZ_NMQ001000058 | Corynebacterium sp. NBT06-6 contigS8, whole genome shotgun sequence                           | 30-Aug-17     | 4-Jan-18      | 1       |     | Corynebacterium sp. NBT06-6                                                 | WGS,RefSeq | Corynebacterium sp. NBT06-6              | 1391   | 0           | NBT06-6                                        | genomic DNA |             | Deep Sea Water                                                         | 20        | 1410     | FALSE   | ncbi_filtered     | 2026255  |
| KY593177_1_1492                | 2041036  | KY593177        | Corynebacterium gottigenense                                                                  | 14-Feb-17     | 4-Jan-18      | 1       |     | Corynebacterium gottigenense                                                |            | Corynebacterium gottigenense             | 1492   | 0           | 99221/2016                                     | genomic DNA |             | blood of a patient                                                     | 1         | 1492     | TRUE    | ncbi_filtered     | 2041036  |
| MGI90030_1_1500                | 2044872  | MGI90030        | Pseudomonas bohemica strain IA19 16S ribosomal RNA gene, partial sequence                     | 17-Oct-17     | 4-Jan-18      | 1       |     | Pseudomonas bohemica                                                        |            | Pseudomonas bohemica                     | 1500   | 0           | IA19                                           | genomic DNA |             |                                                                        | 1         | 1500     | FALSE   | ncbi_filtered     | 2044872  |
| NZ_L1985754_1164480_1166027    | 2058293  | NZ_L1985754     | Selenomonas sp. Marseille-P4036, whole genome shotgun sequence                                | 28-Mar-18     | 31-Mar-18     | 1       |     | Selenomonas sp. Marseille-P4036                                             | WGS,RefSeq | Selenomonas sp. Marseille-P4036          | 1548   | 0           | Marseille-P4036                                | genomic DNA |             | skin                                                                   | 1164480   | 1166027  | FALSE   | ncbi_filtered     | 2058293  |
| NZ_L1985754_321218_322763      | 2058293  | NZ_L1985754     | Selenomonas sp. Marseille-P4036, whole genome shotgun sequence                                | 28-Mar-18     | 31-Mar-18     | 1       |     | Selenomonas sp. Marseille-P4036                                             | WGS,RefSeq | Selenomonas sp. Marseille-P4036          | 1546   | 0           | Marseille-P4036                                | genomic DNA |             | skin                                                                   | 321218    | 322763   | FALSE   | ncbi_filtered     | 2058293  |
| NZ_L1985756_239449_240995      | 2058293  | NZ_L1985756     | Selenomonas sp. Marseille-P4036, whole genome shotgun sequence                                | 28-Mar-18     | 31-Mar-18     | 1       |     | Selenomonas sp. Marseille-P4036                                             | WGS,RefSeq | Selenomonas sp. Marseille-P4036          | 1547   | 0           | Marseille-P4036                                | genomic DNA |             | skin                                                                   | 239449    | 240995   | FALSE   | ncbi_filtered     | 2058293  |
| 12372-102                      | 2_1      | AV738699        |                                                                                               |               |               |         |     |                                                                             |            | Porphyromonas sp. type 1                 | 900    | 0           |                                                |             |             |                                                                        | 1         | 900      | TRUE    | freedicks_clone   | 2_1      |
| 12372-53                       | 2_1      |                 |                                                                                               |               |               |         |     |                                                                             |            | Porphyromonas sp. type 1                 | 900    | 0           |                                                |             |             |                                                                        | 1         | 900      | TRUE    | freedicks_clone   | 2_1      |
| 1237-67                        | 2_1      |                 |                                                                                               |               |               |         |     |                                                                             |            | Porphyromonas sp. type 1                 | 900    | 0           |                                                |             |             |                                                                        | 1         | 900      | TRUE    | freedicks_clone   | 2_1      |
| 3025-189R-110                  | 838_3    |                 |                                                                                               |               |               |         |     |                                                                             |            | Prevotella group 3                       | 1430   | 0           |                                                |             |             |                                                                        | 1         | 1430     | TRUE    | freedicks_clone   | 838_3    |
| 3025-138R-60                   | 838_3    |                 |                                                                                               |               |               |         |     |                                                                             |            | Prevotella group 3                       | 1102   | 0           |                                                |             |             |                                                                        | 1         | 1102     | TRUE    | freedicks_clone   | 838_3    |
| 88V-52                         | 838_3    |                 |                                                                                               |               |               |         |     |                                                                             |            | Prevotella group 3                       | 898    | 0           |                                                |             |             |                                                                        | 1         | 898      | TRUE    | freedicks_clone   | 838_3    |
| 88V-4                          | 838_3    |                 |                                                                                               |               |               |         |     |                                                                             |            | Prevotella group 3                       | 900    | 0           |                                                |             |             |                                                                        | 1         | 900      | TRUE    | freedicks_clone   | 838_3    |
| 123b-189R-11                   | 838_4    |                 |                                                                                               |               |               |         |     |                                                                             |            | Prevotella group 4                       | 1450   | 0           |                                                |             |             |                                                                        | 1         | 1450     | TRUE    | freedicks_clone   | 838_4    |
| 18VBact-28                     | 838_4    |                 |                                                                                               |               |               |         |     |                                                                             |            | Prevotella group 4                       | 884    | 0           |                                                |             |             |                                                                        | 1         | 884      | TRUE    | freedicks_clone   | 838_4    |
| 3025-138R-43                   | 838_4    |                 |                                                                                               |               |               |         |     |                                                                             |            | Prevotella group 4                       | 1106   | 0           |                                                |             |             |                                                                        | 1         | 1106     | TRUE    | freedicks_clone   | 838_4    |
| 68V-15                         | 838_4    | EU188956        |                                                                                               |               |               |         |     |                                                                             |            | Prevotella group 4                       | 900    | 0           |                                                |             |             |                                                                        | 1         | 900      | TRUE    | freedicks_clone   | 838_4    |
| 78VA-26                        | 838_4    | EU738700        |                                                                                               |               |               |         |     |                                                                             |            | Prevotella group 4                       | 900    | 0           |                                                |             |             |                                                                        | 1         | 900      | TRUE    | freedicks_clone   | 838_4    |
| 113B-66                        | 838_5    |                 |                                                                                               |               |               |         |     |                                                                             |            | Prevotella group 5                       | 898    | 0           |                                                |             |             |                                                                        | 1         | 898      | TRUE    | freedicks_clone   | 838_5    |
| 123b-13f                       | 906_2    | EU188987        |                                                                                               |               |               |         |     |                                                                             |            | Megaspheara sp. type 2                   | 1540   | 0           |                                                |             |             |                                                                        | 1         | 1540     | TRUE    | freedicks_clone   | 906_2    |
| 123b-189R-13                   | 906_2    |                 |                                                                                               |               |               |         |     |                                                                             |            | Megaspheara sp. type 2                   | 1540   | 0           |                                                |             |             |                                                                        | 1         | 1540     | TRUE    | freedicks_clone   | 906_2    |
| 3025-189R-21                   | 906_2    |                 |                                                                                               |               |               |         |     |                                                                             |            | Megaspheara sp. type 2                   | 1540   | 0           |                                                |             |             |                                                                        | 1         | 1540     | TRUE    | freedicks_clone   | 906_2    |
| 3025-138R-4                    | 906_2    |                 |                                                                                               |               |               |         |     |                                                                             |            | Megaspheara sp. type 2                   | 1220   | 0           |                                                |             |             |                                                                        | 1         | 1220     | TRUE    | freedicks_clone   | 906_2    |
| 78VA-22                        | 906_2    |                 |                                                                                               |               |               |         |     |                                                                             |            | Megaspheara sp. type 2                   | 823    | 0           |                                                |             |             |                                                                        | 1         | 823      | TRUE    | freedicks_clone   | 906_2    |
| JX104007_1_1388                | arc1_s   | JX104007        | Arcanobacterium sp. S3PF19 16S ribosomal RNA gene, partial sequence                           | 10-Apr-14     | 4-Jan-18      | 1       |     | Arcanobacterium sp. S3PF19                                                  |            | Arcanobacterium vaginal sp. type 1       | 1388   | 0           | S3PF19                                         | genomic DNA |             | vaginal swab                                                           | 1         | 1388     | TRUE    | freedicks_isolate | arc1_s   |
| 123b-25                        | bvab1_s  |                 |                                                                                               |               |               |         |     |                                                                             |            | BVAB1 (species)                          | 900    | 0           |                                                |             |             |                                                                        | 1         | 900      | TRUE    | freedicks_clone   | bvab1_s  |
| 141b-3                         | bvab1_s  |                 |                                                                                               |               |               |         |     |                                                                             |            | BVAB1 (species)                          | 900    | 0           |                                                |             |             |                                                                        | 1         | 900      | TRUE    | freedicks_clone   | bvab1_s  |
| 48Vb-79                        | bvab1_s  |                 |                                                                                               |               |               |         |     |                                                                             |            | BVAB1 (species)                          | 726    | 0           |                                                |             |             |                                                                        | 1         | 726      | TRUE    | freedicks_clone   | bvab1_s  |
| 123b-28                        | bvab2_s  | GQ900640        |                                                                                               |               |               |         |     |                                                                             |            | BVAB2 (species)                          | 900    | 0           |                                                |             |             |                                                                        | 1         | 900      | TRUE    | freedicks_clone   | bvab2_s  |
| 163b-51                        | bvab2_s  | GQ900638        |                                                                                               |               |               |         |     |                                                                             |            | BVAB2 (species)                          | 900    | 0           |                                                |             |             |                                                                        | 1         | 900      | TRUE    | freedicks_clone   | bvab2_s  |
| 48Vb-3                         | bvab2_s  |                 |                                                                                               |               |               |         |     |                                                                             |            | BVAB2 (species)                          | 866    | 0           |                                                |             |             |                                                                        | 1         | 866      | TRUE    | freedicks_clone   | bvab2_s  |
| 68V-11                         | bvab2_s  |                 |                                                                                               |               |               |         |     |                                                                             |            | BVAB2 (species)                          | 845    | 1           |                                                |             |             |                                                                        | 1         | 845      | TRUE    | freedicks_clone   | bvab2_s  |
| 1131-83                        | dia12_s  | EU189012        |                                                                                               |               |               |         |     |                                                                             |            | Dialister sp. type 2                     | 900    | 0           |                                                |             |             |                                                                        | 1         | 900      | TRUE    | freedicks_clone   | dia12_s  |
| 123Q-21                        | dia12_s  | GQ900644        |                                                                                               |               |               |         |     |                                                                             |            | Dialister sp. type 2                     | 900    | 0           |                                                |             |             |                                                                        | 1         | 900      | TRUE    | freedicks_clone   | dia12_s  |
| 78Vb-75                        | dia12_s  |                 |                                                                                               |               |               |         |     |                                                                             |            | Dialister sp. type 2                     | 822    | 0           |                                                |             |             |                                                                        | 1         | 822      | TRUE    | freedicks_clone   | dia12_s  |
| 88V-50                         | dia12_s  | GQ900645        |                                                                                               |               |               |         |     |                                                                             |            | Dialister sp. type 2                     | 825    | 2           |                                                |             |             |                                                                        | 1         | 825      | TRUE    | freedicks_clone   | dia12_s  |
| KP192307_1_1422                | dia12_s  | KP192307        | Veillonellaceae bacterium DNF00626 16S ribosomal RNA gene, partial sequence                   | 1-Apr-15      | 4-Jan-18      | 1       |     | Veillonellaceae bacterium DNF00626                                          |            | Dialister sp. type 2                     | 1422   | 0           |                                                | DNF00626    | genomic DNA | vaginal fluid from subject with bacterial vaginosis                    | 1         | 1422     | TRUE    | freedicks_isolate | dia12_s  |
| 123Q-104                       | egg1_s   |                 |                                                                                               |               |               |         |     |                                                                             |            | Eggerthella sp. type 1                   | 900    | 0           |                                                |             |             |                                                                        | 1         | 900      | TRUE    | freedicks_clone   | egg1_s   |
| A1958913                       | egg1_s   | A1958913        | Eggerthella sp. type 1                                                                        |               |               |         |     | Uncultured bacterium clone rRNA140 16S ribosomal RNA gene, partial sequence |            | Eggerthella sp. type 1                   | 1460   | 0           |                                                |             |             |                                                                        | 1         | 1460     | TRUE    | freedicks_isolate | egg1_s   |
| J871234                        | egg1_s   | J871234         | Eggerthella sp. type 1                                                                        |               |               |         |     | Uncultured bacterium clone 4.070-1 16S ribosomal RNA gene, partial sequence |            | Eggerthella sp. type 1                   | 1364   | 0           |                                                |             |             |                                                                        | 1         | 1364     | TRUE    | freedicks_isolate | egg1_s   |
| KU726662_1_1426                | how1_s   | KU726662        | Clostridiaceae bacterium DNF00545 16S ribosomal RNA gene, partial sequence                    | 26-Apr-16     | 4-Jan-18      | 1       |     | Clostridiaceae bacterium DNF00545                                           |            | Howardella vaginal sp. type 1            | 1426   | 0           | DNF00545                                       | genomic DNA |             | vaginal fluid from subject with bacterial vaginosis                    | 1         | 1426     | TRUE    | freedicks_isolate | how1_s   |
| 123b-31                        | tm7vag_s | EU189005        |                                                                                               |               |               |         |     |                                                                             |            | Candidate Division TM7 vaginal (species) | 900    | 0           |                                                |             |             |                                                                        | 1         | 900      | TRUE    | freedicks_clone   | tm7vag_s |
| A8542397_1_1458                | AB542397 | A8542397        | Herbaspirillum sp. TSA40 gene for 16S ribosomal RNA, partial sequence, strain: TSA40          | 20-Jan-11     | 4-Jan-18      | 1       |     | Noviherbaspirillum denitrificans                                            |            | Noviherbaspirillum denitrificans         | 1458   | 0           | TSA40                                          | genomic DNA |             | rice paddy soil                                                        | 1         | 1458     | TRUE    |                   |          |
| AB907777_1_1491                | AB907777 | AB907777        | Erwinia aphidicola gene for 16S ribosomal RNA, partial sequence, strain: IAM 14479            | 9-Dec-15      | 4-Jan-18      | 1       |     | Erwinia aphidicola                                                          |            | Erwinia aphidicola                       | 1491   | 1           | IAM 14479                                      |             |             |                                                                        |           |          |         |                   |          |

| seqname                   | tax_id  | accession | description                                                                                   | modified_date | download_date | version | num | source                                                      | keywords            | organism                                   | length | ambig_count | strain          | mol_type    | isolate       | isolation_source                    | seq_start | seq_step | is_type | collection | species       |
|---------------------------|---------|-----------|-----------------------------------------------------------------------------------------------|---------------|---------------|---------|-----|-------------------------------------------------------------|---------------------|--------------------------------------------|--------|-------------|-----------------|-------------|---------------|-------------------------------------|-----------|----------|---------|------------|---------------|
| JX997988_1_1487           | 1267217 | JX997988  | Comamonadaceae sp. KB812 16S ribosomal RNA gene, partial sequence                             | 12-Dec-12     | 4-Jan-18      | 1       |     | Comamonadaceae bacterium KB812                              |                     | Comamonadaceae bacterium KB812             | 1487   | 0           | KB812           | genomic DNA |               | swine waste                         | 1         | 1487     | TRUE    |            |               |
| KF667502_1_1483           | 1552750 | KF667502  | Zoogloea olearovans strain Buc 16S ribosomal RNA gene, partial sequence                       | 6-Jan-16      | 4-Jan-18      | 1       |     | Zoogloea olearovans                                         |                     | Zoogloea olearovans                        | 1433   | 0           | Buc             | genomic DNA |               | biofilm                             | 1         | 1433     | TRUE    |            |               |
| KJ528316_1_1392           | 1510276 | KJ528316  | Blastomonas aquatica strain PE 4-5 16S ribosomal RNA gene, partial sequence                   | 23-Mar-16     | 4-Jan-18      | 1       |     | Blastomonas aquatica                                        |                     | Blastomonas aquatica                       | 1492   | 0           | PE 4-5          | genomic DNA | K             | lake water                          | 1         | 1392     | TRUE    |            |               |
| KM670031_1_1432           | 1550728 | KM670031  | Blastomonas fulva strain T2 16S ribosomal RNA gene, partial sequence                          | 31-Aug-17     | 4-Jan-18      | 2       |     | Blastomonas fulva                                           |                     | Blastomonas fulva                          | 1432   | 0           | T2              | genomic DNA |               | Microcystis culture                 | 1         | 1432     | TRUE    |            |               |
| KR001919_1_1481           | 1712031 | KR001919  | Streptobacillus notomysis strain AHL 370-1 16S ribosomal RNA gene, partial sequence           | 8-Aug-17      | 4-Jan-18      | 1       |     | Streptobacillus notomysis                                   |                     | Streptobacillus notomysis                  | 1481   | 0           | AHL 370-1       | genomic DNA |               | liver from spinniflex hopping mouse | 1         | 1481     | TRUE    |            |               |
| KT343144_1_1413           | 1769421 | KT343144  | Alloscardovia sp. MOD2V/2 16S ribosomal RNA gene, partial sequence                            | 19-Dec-15     | 4-Jan-18      | 1       |     | Alloscardovia venturii                                      |                     | Alloscardovia venturii                     | 1413   | 0           | MOD2V/2         | genomic DNA |               | oral cavity of guinea pig           | 1         | 1413     | TRUE    |            |               |
| KT361203_1_1459           | 1697944 | KT361203  | Pontibacter sp. NP1 16S ribosomal RNA gene, partial sequence                                  | 8-Nov-16      | 4-Jan-18      | 2       |     | Pontibacter aurantiacus                                     |                     | Pontibacter aurantiacus                    | 1459   | 0           | NP1             | genomic DNA |               | HCH isomer-contaminated pond soil   | 1         | 1459     | TRUE    |            |               |
| KX250272_1_1411           | 1867408 | KX250272  | Blastomonas sp. SSR2A-4-2 16S ribosomal RNA gene, partial sequence                            | 16-Aug-16     | 4-Jan-18      | 1       |     | Blastomonas marina                                          |                     | Blastomonas marina                         | 1411   | 0           | SSR2A-4-2       | genomic DNA |               | sea water                           | 1         | 1411     | TRUE    |            |               |
| KX773497_1_1539           | 85620   | KX773497  | Candidatus Phytoplasma asteris isolate Rus-CPH290fC2 16S ribosomal RNA gene, partial sequence | 11-Sep-17     | 4-Jan-18      | 1       |     | Candidatus Phytoplasma asteris (16Sf) (Aster yellows group) |                     | Candidatus Phytoplasma asteris             | 1539   | 0           |                 | genomic DNA | Rus-CPH290fC2 | Trifolium hybridum L.               | 1         | 1539     | FALSE   |            | ncbi_filtered |
| KX990274_1_1440           | 1909751 | KX990274  | Blastomonas sp. 912 16S ribosomal RNA gene, partial sequence                                  | 19-Oct-16     | 4-Jan-18      | 1       |     | Blastomonas quesadae                                        |                     | Blastomonas quesadae                       | 1440   | 0           | 912             | genomic DNA |               | saline soil                         | 1         | 1440     | TRUE    |            |               |
| KY020782_1_1407           | 1912093 | KY020782  | Luteimonas sp. SF12 16S ribosomal RNA gene, partial sequence                                  | 26-Oct-16     | 4-Jan-18      | 1       |     | Luteimonas sp. SF12                                         |                     | Luteimonas sp. SF12                        | 1407   | 0           | SF12            | genomic DNA |               | wheat root soil                     | 1         | 1407     | TRUE    |            |               |
| KY013277_1_1458           | 2000710 | KY013277  | Cloacibacterium sp. strain B6 16S ribosomal RNA gene, partial sequence                        | 2-Nov-16      | 4-Jan-18      | 1       |     | Cloacibacterium caeni                                       |                     | Cloacibacterium caeni                      | 1458   | 0           | B6              | genomic DNA |               | sludge                              | 1         | 1458     | TRUE    |            |               |
| KY244028_1_1434           | 1926649 | KY244028  | Pseudokococcus sp. SKC1-2 16S ribosomal RNA gene, partial sequence                            | 17-Dec-16     | 4-Jan-18      | 1       |     | Pseudokococcus basantibodiensis                             |                     | Pseudokococcus basantibodiensis            | 1434   | 0           | SKC1-2          | genomic DNA |               |                                     | 1         | 1434     | TRUE    |            |               |
| KY674517_1_1435           | 2041023 | KY674517  | Paenibacillus sp. strain Qd-3 16S ribosomal RNA gene, partial sequence                        | 30-Jun-17     | 4-Jan-18      | 1       |     | Paenibacillus albidus                                       |                     | Paenibacillus albidus                      | 1435   | 0           | Qd-3            | genomic DNA |               | grassland                           | 1         | 1435     | TRUE    |            |               |
| LC011040_1_1481           | 36835   | LC011040  | [Clostridium] colinum gene for 16S ribosomal RNA, partial sequence, strain: JCM 5831          | 22-Nov-14     | 4-Jan-18      | 1       |     | [Clostridium] colinum                                       |                     | [Clostridium] colinum                      | 1481   | 0           | JCM 5831        | genomic DNA |               |                                     | 1         | 1481     | TRUE    |            |               |
| LC036321_1_1522           | 52226   | LC036321  | Mitsuokella multicauda gene for 16S ribosomal RNA, partial sequence, strain: JCM 2054         | 20-Mar-15     | 4-Jan-18      | 1       |     | Mitsuokella multicauda                                      |                     | Mitsuokella multicauda                     | 1522   | 1           | JCM 2054        | genomic DNA |               |                                     | 1         | 1522     | TRUE    |            |               |
| LC037228_1_1493           | 88431   | LC037228  | Dorea longicatena gene for 16S ribosomal RNA, partial sequence, strain: JCM 11232             | 25-Mar-15     | 4-Jan-18      | 1       |     | Dorea longicatena                                           |                     | Dorea longicatena                          | 1493   | 0           | JCM 11232       | genomic DNA |               |                                     | 1         | 1493     | TRUE    |            |               |
| LC108744_1_1483           | 92759   | LC108744  | Gluconacetobacter sacchari gene for 16S ribosomal RNA, partial sequence, strain: DSM 12717    | 7-Jan-16      | 4-Jan-18      | 1       |     | Gluconacetobacter sacchari                                  |                     | Gluconacetobacter sacchari                 | 1483   | 0           | DSM 12717       | genomic DNA |               |                                     | 1         | 1483     | TRUE    |            |               |
| LN610504_1_1457           | 1548602 | LN610504  | Nesterenkonia sp. BV-35 partial 16S rRNA gene, strain BV-35                                   | 19-Nov-14     | 4-Jan-18      | 1       |     | Nesterenkonia pamonica                                      |                     | Nesterenkonia pamonica                     | 1457   | 0           | BV-35           | genomic DNA |               | soda soil                           | 1         | 1457     | TRUE    |            |               |
| LN870298_1_1495           | 1689270 | LN870298  | Intestinimonas sp. GD4 partial 16S rRNA gene, strain GD4                                      | 28-Jul-15     | 4-Jan-18      | 1       |     | Intestinimonas timonensis                                   |                     | Intestinimonas timonensis                  | 1495   | 0           | GD4             | genomic DNA |               | human stool specimen                | 1         | 1495     | TRUE    |            |               |
| LN876649_1_1492           | 1702285 | LN876649  | Intestinimonas sp. GMS partial 16S rRNA gene, strain GMS                                      | 27-Aug-15     | 4-Jan-18      | 1       |     | Intestinimonas gabonensis                                   |                     | Intestinimonas gabonensis                  | 1492   | 0           | GMS             | genomic DNA |               | Human stool specimen                | 1         | 1492     | TRUE    |            |               |
| LT231215_1_1526           | 1815559 | LT231215  | Cellobirio sp. MWV-40 partial 16S rRNA gene, strain MWV-40                                    | 29-Mar-17     | 4-Jan-18      | 3       |     | Cellobirio fontihullus                                      |                     | Cellobirio fontihullus                     | 1526   | 0           | MWV-40          | genomic DNA |               | fresh water                         | 1         | 1526     | TRUE    |            |               |
| LT598562_1_1520           | 1871002 | LT598562  | Acidaminococcus sp. Marseille-P2764 partial 16S rRNA gene, strain Marseille-P2764             | 8-Mar-17      | 4-Jan-18      | 1       |     | Acidaminococcus timonensis                                  |                     | Acidaminococcus timonensis                 | 1520   | 8           | Marseille-P2764 | genomic DNA |               | Duodenum                            | 1         | 1520     | TRUE    |            |               |
| LT598591_1_1434           | 1871031 | LT598591  | Olsenella sp. Marseille-P3256 partial 16S rRNA gene, strain Marseille-P3256                   | 4-Apr-17      | 4-Jan-18      | 2       |     | Olsenella sp. Marseille-P3256                               |                     | Olsenella sp. Marseille-P3256              | 1434   | 1           | Marseille-P3256 | genomic DNA |               | Duodenum                            | 1         | 1434     | TRUE    |            |               |
| LT614649_1_1449           | 1899321 | LT614649  | Phyllobacterium sp. LLAN61 partial 16S rRNA gene, strain LLAN61                               | 31-Mar-17     | 4-Jan-18      | 1       |     | Phyllobacterium sp. LLAN61                                  |                     | Phyllobacterium sp. LLAN61                 | 1449   | 0           | LLAN61          | genomic DNA |               | Lotus lancerottensis root nodule    | 1         | 1449     | TRUE    |            |               |
| LT719153_1_1415           | 1940610 | LT719153  | Pireatobacter sp. YC6-17 partial 16S rRNA gene, strain YC6-17                                 | 2-Feb-17      | 4-Jan-18      | 1       |     | Pireatobacter stygius                                       |                     | Pireatobacter stygius                      | 1415   | 0           | YC6-17          | genomic DNA |               | lava tube                           | 1         | 1415     | TRUE    |            |               |
| NC_002939_1224139_1225694 | 243231  | NC_002939 | Geobacter sulfurreducens PCA chromosome, complete genome                                      | 3-Aug-16      | 4-Jan-18      | 5       |     | Geobacter sulfurreducens PCA                                | RefSeq              | Geobacter sulfurreducens PCA               | 1556   | 0           | PCA             | genomic DNA |               |                                     | 1224139   | 1225694  | TRUE    |            |               |
| NC_003063_1304314_1305793 | 176299  | NC_003063 | Agrobacterium fabrum str. C58 chromosome linear, complete sequence                            | 3-Aug-16      | 4-Jan-18      | 2       |     | Agrobacterium fabrum str. C58                               | RefSeq              | Agrobacterium fabrum str. C58              | 1480   | 0           | C58             | genomic DNA |               |                                     | 1304314   | 1305793  | TRUE    |            |               |
| NC_005043_997883_999443   | 182082  | NC_005043 | Chlamydomonada pneumoniae TW-183, complete genome                                             | 29-Mar-17     | 4-Jan-18      | 1       |     | Chlamydomonada pneumoniae TW-183                            | RefSeq              | Chlamydomonada pneumoniae TW-183           | 1561   | 0           | TW-183          | genomic DNA |               |                                     | 997883    | 999443   | TRUE    |            |               |
| NC_006177_288165_289740   | 292459  | NC_006177 | Symbiobacterium thermophilum IAM 14863 DNA, complete genome                                   | 17-Apr-17     | 4-Jan-18      | 1       |     | Symbiobacterium thermophilum IAM 14863                      | RefSeq              | Symbiobacterium thermophilum IAM 14863     | 1576   | 0           | IAM14863        | genomic DNA |               |                                     | 288165    | 289740   | TRUE    |            |               |
| NC_006177_294624_296199   | 292459  | NC_006177 | Symbiobacterium thermophilum IAM 14863 DNA, complete genome                                   | 17-Apr-17     | 4-Jan-18      | 1       |     | Symbiobacterium thermophilum IAM 14863                      | RefSeq              | Symbiobacterium thermophilum IAM 14863     | 1576   | 0           | IAM14863        | genomic DNA |               |                                     | 294624    | 296199   | TRUE    |            |               |
| NC_007517_1310037_1311594 | 269799  | NC_007517 | Geobacter metallireducens GS-15, complete genome                                              | 6-Apr-17      | 4-Jan-18      | 1       |     | Geobacter metallireducens GS-15                             | RefSeq              | Geobacter metallireducens GS-15            | 1558   | 0           | GS-15           | genomic DNA |               |                                     | 1310037   | 1311594  | TRUE    |            |               |
| NC_010528_2925025_2926562 | 977880  | NC_010528 | Cupriavidus taiwanensis str. LMG19424 chromosome 1, complete genome                           | 18-May-17     | 4-Jan-18      | 1       |     | Cupriavidus taiwanensis LMG 19424                           | RefSeq              | Cupriavidus taiwanensis LMG 19424          | 1538   | 0           | LMG19424        | genomic DNA |               |                                     | 2925025   | 2926562  | TRUE    |            |               |
| NC_010581_3418470_3419966 | 395963  | NC_010581 | Berjeirinia indica subsp. indica ATCC 9039, complete genome                                   | 18-May-17     | 4-Jan-18      | 1       |     | Berjeirinia indica subsp. indica ATCC 9039                  | RefSeq              | Berjeirinia indica subsp. indica ATCC 9039 | 1497   | 0           | ATCC 9039       | genomic DNA |               |                                     | 3418470   | 3419966  | TRUE    |            |               |
| NC_010995_1059262_1061465 | 498211  | NC_010995 | Cellobirio japonicus Ueda107, complete genome                                                 | 18-May-17     | 4-Jan-18      | 1       |     | Cellobirio japonicus Ueda107                                | RefSeq              | Cellobirio japonicus Ueda107               | 1540   | 0           | Ueda107         | genomic DNA |               |                                     | 1059262   | 1061465  | TRUE    |            |               |
| NC_011146_1175447_1177007 | 404380  | NC_011146 | Geobacter bemidjensis Bem, complete genome                                                    | 18-May-17     | 4-Jan-18      | 1       |     | Geobacter bemidjensis Bem                                   | RefSeq              | Geobacter bemidjensis Bem                  | 1561   | 0           | Bem             | genomic DNA |               |                                     | 1175447   | 1177007  | TRUE    |            |               |
| NC_011666_1934558_1936057 | 395965  | NC_011666 | Methyloccella silvestris BL2, complete genome                                                 | 19-May-17     | 4-Jan-18      | 1       |     | Methyloccella silvestris BL2                                | RefSeq              | Methyloccella silvestris BL2               | 1500   | 0           | BL2             | genomic DNA |               |                                     | 1934558   | 1936057  | TRUE    |            |               |
| NC_011979_3989236_3990795 | 316067  | NC_011979 | Geobacter duttoni FRC-32, complete genome                                                     | 18-May-17     | 4-Jan-18      | 1       |     | Geobacter duttoni FRC-32                                    | RefSeq              | Geobacter duttoni FRC-32                   | 1560   | 0           | FRC-32          | genomic DNA |               |                                     | 3989236   | 3990795  | TRUE    |            |               |
| NC_014006_68191_69686     | 452662  | NC_014006 | Sphingobium japonicum UT265 DNA, chromosome 1, complete genome                                | 7-Apr-17      | 4-Jan-18      | 1       |     | Sphingobium japonicum UT265                                 | RefSeq              | Sphingobium japonicum UT265                | 1496   | 0           | UT265           | genomic DNA |               |                                     | 68191     | 69686    | TRUE    |            |               |
| NC_014363_159956_161474   | 633147  | NC_014363 | Olsenella uli DSM 7084, complete genome                                                       | 7-Apr-17      | 4-Jan-18      | 1       |     | Olsenella uli DSM 7084                                      | GSC:MIGS-2.1;RefSeq | Olsenella uli DSM 7084                     | 1519   | 0           | DSM 7084        | genomic DNA |               | gingival crevice                    | 159956    | 161474   | TRUE    |            |               |
| NC_015437_1045004_1046565 | 546271  | NC_015437 | Selenomonas putigena ATCC 35185, complete genome                                              | 7-Apr-17      | 4-Jan-18      | 1       |     | Selenomonas putigena ATCC 35185                             | GSC:MIGS-2.1;RefSeq | Selenomonas putigena ATCC 35185            | 1562   | 0           | ATCC 35185      | genomic DNA |               | subgingival sulcus                  | 1045004   | 1046565  | TRUE    |            |               |
| NC_015726_3598854_3600393 | 1042878 | NC_015726 | Cupriavidus necator N-1 chromosome 1, complete sequence                                       | 22-Oct-17     | 4-Jan-18      | 1       |     | Cupriavidus necator N-1                                     | RefSeq              | Cupriavidus necator N-1                    | 1540   | 0           | N-1             | genomic DNA |               | soil                                | 3598854   | 3600393  | TRUE    |            |               |
| NC_015914_3325794_3327320 | 880070  | NC_015914 | Cyclobacterium marinum DSM 745, complete genome                                               | 18-May-17     | 4-Jan-18      | 1       |     | Cyclobacterium marinum DSM 745                              | GSC:MIGS-2.1;RefSeq | Cyclobacterium marinum DSM 745             | 1527   | 0           | DSM 745         | genomic DNA |               | coelomic fluid of a sand dollar     | 3325794   | 3327320  | TRUE    |            |               |
| NC_015977_25460_26999     | 583394  | NC_015977 | Roseburia hominis A2-183, complete genome                                                     | 7-Apr-17      | 4-Jan-18      | 1       |     | Roseburia hominis A2-183                                    | RefSeq              | Roseburia hominis A2-183                   | 1540   | 0           | A2-183          | genomic DNA |               |                                     | 25460     | 26999    | TRUE    |            |               |
| NC_017287_1022385_1023937 | 331636  | NC_017287 | Chlamydia psittaci 68C, complete genome                                                       | 4-Sep-17      | 4-Jan-18      | 1       |     | Chlamydia psittaci 68C (Chlamydia psittaci 68C)             | RefSeq              | Chlamydia psittaci 68C                     | 1553   | 0           | 68C             | genomic DNA |               |                                     | 1022385   | 1023937  | TRUE    |            |               |
| NR_024631_1_1452          | 180400  | NR_024631 | Sphingopyxis chilensis strain 537 16S ribosomal RNA gene, partial sequence                    | 3-Feb-15      | 4-Jan-18      | 1       |     | Sphingopyxis chilensis                                      | RefSeq              | Sphingopyxis chilensis                     | 1452   | 0           | 537             | rRNA        |               |                                     | 1         | 1452     | TRUE    |            |               |
| NR_024850_1_1350          | 41977   | NR_024850 | Azoarcus communis strain SWub3 16S ribosomal RNA gene, partial sequence                       | 3-Feb-15      | 4-Jan-18      | 1       |     | Azoarcus communis                                           | RefSeq              | Azoarcus communis                          | 1350   | 1           | SWub3; LMG 2127 | rRNA        |               |                                     | 1         | 1350     | TRUE    |            |               |
| NR_024851_1_1484          | 29545   | NR_024851 | Azoarcus indigenus strain VB32 16S ribosomal RNA gene, partial sequence                       | 3-Feb-15      | 4-Jan-18      | 1       |     | Azoarcus indigenus                                          | RefSeq              | Azoarcus indigenus                         | 1484   | 6           | VB32; DSM 12121 | rRNA        |               |                                     | 1         | 1484     | TRUE    |            |               |
| NR_024879_1_1473          | 71433   | NR_024879 | Mesorhizobium amorphae strain ACCC 19665 16S ribosomal RNA, partial sequence                  | 24-Oct-17     | 4-Jan-18      | 1       |     | Mesorhizobium amorphae                                      | RefSeq              | Mesorhizobium amorphae                     | 1473   | 0           | ACCC 19665      | rRNA        |               |                                     | 1         | 1473     | TRUE    |            |               |
| NR_024883_1_1414          | 73088   | NR_024883 | Kluyvera georgiana strain ATCC 51603 16S ribosomal RNA gene, partial sequence                 | 3-Feb-15      | 4-Jan-18      | 1       |     | Kluyvera georgiana                                          | RefSeq              | Kluyvera georgiana                         | 1414   | 5           | ATCC 51603      | rRNA        |               |                                     | 1         | 1414     | TRUE    |            |               |
| NR_025024_1_1488          | 103815  | NR_025024 | Paenibacillus chinjiensis strain WN9 16S ribosomal RNA gene, partial sequence                 | 3-Feb-15      | 4-Jan-18      | 1       |     | Paenibacillus chin                                          |                     |                                            |        |             |                 |             |               |                                     |           |          |         |            |               |

| seqname          | tax_id  | accession | description                                                                                   | modified_date | download_date | version | num_source | keywords                                         | organism                             | length | ambig_count | strain                    | mol_type | isolate | isolation_source                                                                      | seq_start | seq_stop | is_type | collection | species |
|------------------|---------|-----------|-----------------------------------------------------------------------------------------------|---------------|---------------|---------|------------|--------------------------------------------------|--------------------------------------|--------|-------------|---------------------------|----------|---------|---------------------------------------------------------------------------------------|-----------|----------|---------|------------|---------|
| NR_027561_1_1409 | 395965  | NR_027561 | Methylocella silvestris strain BL2 16S ribosomal RNA gene, partial sequence                   | 3-Feb-15      | 4-Jan-18      | 1       |            | Methylocella silvestris BL2 RefSeq               | Methylocella silvestris BL2          | 1409   | 0           | BL2                       | rRNA     |         | forest soil                                                                           | 1         | 1409     | TRUE    |            |         |
| NR_027576_1_1548 | 85991   | NR_027576 | Chlamydia pecorum strain Bo/E58 16S ribosomal RNA, partial sequence                           | 24-Oct-17     | 4-Jan-18      | 1       |            | Chlamydia pecorum (Chlamydia philipponis) RefSeq | Chlamydia pecorum                    | 1548   | 0           | Bo/E58                    | rRNA     |         |                                                                                       | 1         | 1548     | TRUE    |            |         |
| NR_027596_1_1511 | 52226   | NR_027596 | Mitsuokella multacidia strain DSM 20544 16S ribosomal RNA gene, partial sequence              | 3-Feb-15      | 4-Jan-18      | 1       |            | Mitsuokella multacidia RefSeq                    | Mitsuokella multacidia               | 1511   | 11          | DSM 20544; NCTC 10934     | rRNA     |         |                                                                                       | 1         | 1511     | TRUE    |            |         |
| NR_027615_1_1485 | 34105   | NR_027615 | Streptobacillus moniliformis strain DSM 12112 16S ribosomal RNA gene, partial sequence        | 3-Feb-15      | 4-Jan-18      | 1       |            | Streptobacillus moniliformis RefSeq              | Streptobacillus moniliformis         | 1485   | 0           | ATCC 14647                | rRNA     |         |                                                                                       | 1         | 1485     | TRUE    |            |         |
| NR_028638_1_1482 | 104662  | NR_028638 | Chitinophaga japonensis strain 758 16S ribosomal RNA gene, partial sequence                   | 3-Feb-15      | 4-Jan-18      | 1       |            | Chitinophaga japonensis RefSeq                   | Chitinophaga japonensis              | 1482   | 0           | 758; IFO 16041            | rRNA     |         |                                                                                       | 1         | 1482     | TRUE    |            |         |
| NR_028797_1_1524 | 135082  | NR_028797 | Selenomonas infelix strain VPI D 75 B-30 16S ribosomal RNA gene, partial sequence             | 3-Feb-15      | 4-Jan-18      | 1       |            | Selenomonas infelix RefSeq                       | Selenomonas infelix                  | 1524   | 0           | VPI D 75 B-30; ATCC 49532 | rRNA     |         |                                                                                       | 1         | 1524     | TRUE    |            |         |
| NR_028802_1_1453 | 61648   | NR_028802 | Kluyvera intermedia strain 256 16S ribosomal RNA gene, partial sequence                       | 3-Feb-15      | 4-Jan-18      | 1       |            | Kluyvera intermedia RefSeq                       | Kluyvera intermedia                  | 1453   | 0           | 256; ATCC 33110           | rRNA     |         |                                                                                       | 1         | 1453     | TRUE    |            |         |
| NR_028883_1_1316 | 88431   | NR_028883 | Dorea longicatena strain 111-35 16S ribosomal RNA gene, partial sequence                      | 3-Feb-15      | 4-Jan-18      | 1       |            | Dorea longicatena RefSeq                         | Dorea longicatena                    | 1316   | 0           | 111-35; DSM 13814         | rRNA     |         |                                                                                       | 1         | 1316     | TRUE    |            |         |
| NR_028909_1_1484 | 108528  | NR_028909 | Glucanacetobacter entanii strain LTH4560 16S ribosomal RNA gene, partial sequence             | 3-Feb-15      | 4-Jan-18      | 1       |            | Glucanacetobacter entanii RefSeq                 | Glucanacetobacter entanii            | 1484   | 2           | LTH4560; DSM 13536        | rRNA     |         |                                                                                       | 1         | 1484     | TRUE    |            |         |
| NR_028923_1_1415 | 133552  | NR_028923 | Methylocapsa acidiphila strain B2 16S ribosomal RNA gene, partial sequence                    | 3-Feb-15      | 4-Jan-18      | 1       |            | Methylocapsa acidiphila RefSeq                   | Methylocapsa acidiphila              | 1415   | 0           | B2; DSM 13967; NCMB 13765 | rRNA     |         | novel acidophilic, methane-oxidizing bacterium isolated from acidic Sphagnum peat bog | 1         | 1415     | TRUE    |            |         |
| NR_029201_1_1425 | 57000   | NR_029201 | Amarilococcus kaplicensis strain Ben101 16S ribosomal RNA gene, partial sequence              | 3-Feb-15      | 4-Jan-18      | 1       |            | Amarilococcus kaplicensis RefSeq                 | Amarilococcus kaplicensis            | 1425   | 0           | Ben101                    | rRNA     |         |                                                                                       | 1         | 1425     | TRUE    |            |         |
| NR_029202_1_1427 | 57001   | NR_029202 | Amarilococcus macauensis strain Ben104 16S ribosomal RNA gene, partial sequence               | 3-Feb-15      | 4-Jan-18      | 1       |            | Amarilococcus macauensis RefSeq                  | Amarilococcus macauensis             | 1427   | 0           | Ben104                    | rRNA     |         |                                                                                       | 1         | 1427     | TRUE    |            |         |
| NR_029203_1_1431 | 57003   | NR_029203 | Amarilococcus veronensis strain Ben102 16S ribosomal RNA gene, partial sequence               | 3-Feb-15      | 4-Jan-18      | 1       |            | Amarilococcus veronensis RefSeq                  | Amarilococcus veronensis             | 1431   | 4           | Ben102                    | rRNA     |         |                                                                                       | 1         | 1431     | TRUE    |            |         |
| NR_029237_1_1465 | 40091   | NR_029237 | Helcococcus kunzii strain 22 16S ribosomal RNA gene, partial sequence                         | 3-Feb-15      | 4-Jan-18      | 1       |            | Helcococcus kunzii RefSeq                        | Helcococcus kunzii                   | 1465   | 3           | Z2; NCFB 2900             | rRNA     |         |                                                                                       | 1         | 1465     | TRUE    |            |         |
| NR_036780_1_1480 | 373     | NR_036780 | Agrobacterium vitis strain K309 16S ribosomal RNA, partial sequence                           | 24-Oct-17     | 4-Jan-18      | 1       |            | Agrobacterium vitis (Altorhizobium vitis) RefSeq | Agrobacterium vitis                  | 1480   | 0           | K309; NCPPB 3554          | rRNA     |         |                                                                                       | 1         | 1480     | TRUE    |            |         |
| NR_037010_1_1480 | 114     | NR_037010 | Gemmata obscuriglobus strain UQM 2246 16S ribosomal RNA gene, partial sequence                | 3-Feb-15      | 4-Jan-18      | 1       |            | Gemmata obscuriglobus RefSeq                     | Gemmata obscuriglobus                | 1491   | 0           | UQM 2246; DSM 5831        | rRNA     |         |                                                                                       | 1         | 1491     | TRUE    |            |         |
| NR_037028_1_1332 | 79681   | NR_037028 | Tissierella creatinophila strain Kre4 16S ribosomal RNA gene, partial sequence                | 3-Feb-15      | 4-Jan-18      | 1       |            | Tissierella creatinophila RefSeq                 | Tissierella creatinophila            | 1332   | 3           | Kre4; DSM 6911            | rRNA     |         |                                                                                       | 1         | 1332     | TRUE    |            |         |
| NR_037088_1_1453 | 76122   | NR_037088 | Alloprevotella tannerae strain VPI N148 16S ribosomal RNA gene, partial sequence              | 3-Feb-15      | 4-Jan-18      | 1       |            | Alloprevotella tannerae RefSeq                   | Alloprevotella tannerae              | 1453   | 3           | VPI N148                  | rRNA     |         |                                                                                       | 1         | 1453     | TRUE    |            |         |
| NR_040800_1_1488 | 45465   | NR_040800 | Vogesella indigofera strain ATCC 19706 16S ribosomal RNA, partial sequence                    | 24-Oct-17     | 4-Jan-18      | 1       |            | Vogesella indigofera RefSeq                      | Vogesella indigofera                 | 1488   | 6           | ATCC 19706                | rRNA     |         |                                                                                       | 1         | 1488     | TRUE    |            |         |
| NR_041341_1_1458 | 35475   | NR_041341 | Shinella zoogloeoides strain IAM 12669 16S ribosomal RNA gene, partial sequence               | 3-Feb-15      | 4-Jan-18      | 1       |            | Shinella zoogloeoides RefSeq                     | Shinella zoogloeoides                | 1458   | 0           | IAM 12669                 | rRNA     |         |                                                                                       | 1         | 1458     | TRUE    |            |         |
| NR_041347_1_1455 | 112228  | NR_041347 | Alloscardovia criceti strain OMB105 16S ribosomal RNA gene, partial sequence                  | 3-Feb-15      | 4-Jan-18      | 1       |            | Alloscardovia criceti DSM 17774 RefSeq           | Alloscardovia criceti DSM 17774      | 1455   | 0           | OMB105                    | rRNA     |         |                                                                                       | 1         | 1455     | TRUE    |            |         |
| NR_041486_1_1521 | 393003  | NR_041486 | Chitinophaga ginsengisegetis strain Gsoil 040 16S ribosomal RNA gene, partial sequence        | 3-Feb-15      | 4-Jan-18      | 1       |            | Chitinophaga ginsengisegetis RefSeq              | Chitinophaga ginsengisegetis         | 1521   | 0           | Gsoil 040                 | rRNA     |         | soil of the ginseng field                                                             | 1         | 1521     | TRUE    |            |         |
| NR_041501_1_1479 | 398037  | NR_041501 | Segetibacter koreensis strain Gsoil 664 16S ribosomal RNA gene, partial sequence              | 3-Feb-15      | 4-Jan-18      | 1       |            | Segetibacter koreensis RefSeq                    | Segetibacter koreensis               | 1479   | 0           | Gsoil 664                 | rRNA     |         | Soil of the ginseng field                                                             | 1         | 1479     | TRUE    |            |         |
| NR_041522_1_1479 | 1650    | NR_041522 | Kurthia zopfii strain NBRC 101529 16S ribosomal RNA gene, partial sequence                    | 3-Feb-15      | 4-Jan-18      | 1       |            | Kurthia zopfii RefSeq                            | Kurthia zopfii                       | 1479   | 1           | NBRC 101529               | rRNA     |         |                                                                                       | 1         | 1479     | TRUE    |            |         |
| NR_041558_1_1473 | 415212  | NR_041558 | Janibacter corallicola strain 04PA2-Co5-61 16S ribosomal RNA gene, partial sequence           | 3-Feb-15      | 4-Jan-18      | 1       |            | Janibacter corallicola RefSeq                    | Janibacter corallicola               | 1473   | 0           | 04PA2-Co5-61              | rRNA     |         |                                                                                       | 1         | 1473     | TRUE    |            |         |
| NR_041633_1_1439 | 1331058 | NR_041633 | Ilumatobacter fluminis strain YM22-133 16S ribosomal RNA gene, partial sequence               | 3-Feb-15      | 4-Jan-18      | 1       |            | Ilumatobacter fluminis YM22-133 RefSeq           | Ilumatobacter fluminis YM22-133      | 1439   | 0           | YM22-133                  | rRNA     |         | sediment                                                                              | 1         | 1439     | TRUE    |            |         |
| NR_041821_1_1464 | 211502  | NR_041821 | Conchiformibus kuhniae strain ATCC 29437 16S ribosomal RNA gene, partial sequence             | 3-Feb-15      | 4-Jan-18      | 1       |            | Conchiformibus kuhniae RefSeq                    | Conchiformibus kuhniae               | 1464   | 6           | ATCC 29437                | rRNA     |         |                                                                                       | 1         | 1464     | TRUE    |            |         |
| NR_041932_1_1431 | 205941  | NR_041932 | Salinibacterium amurskyense strain KMM 3673 16S ribosomal RNA gene, partial sequence          | 3-Feb-15      | 4-Jan-18      | 1       |            | Salinibacterium amurskyense RefSeq               | Salinibacterium amurskyense          | 1431   | 0           | KMM 3673                  | rRNA     |         |                                                                                       | 1         | 1431     | TRUE    |            |         |
| NR_041974_1_1504 | 69222   | NR_041974 | Erwinia mallotivora strain DSM 4565 16S ribosomal RNA gene, partial sequence                  | 3-Feb-15      | 4-Jan-18      | 1       |            | Erwinia mallotivora RefSeq                       | Erwinia mallotivora                  | 1504   | 0           | DSM 4565                  | rRNA     |         |                                                                                       | 1         | 1504     | TRUE    |            |         |
| NR_042007_1_1454 | 360807  | NR_042007 | Roseburia inulinivorans strain A2-194 16S ribosomal RNA, partial sequence                     | 24-Oct-17     | 4-Jan-18      | 1       |            | Roseburia inulinivorans RefSeq                   | Roseburia inulinivorans              | 1454   | 0           | A2-194                    | rRNA     |         | feces                                                                                 | 1         | 1454     | TRUE    |            |         |
| NR_042008_1_1485 | 301301  | NR_042008 | Roseburia hominis strain A2-183 16S ribosomal RNA, partial sequence                           | 24-Oct-17     | 4-Jan-18      | 1       |            | Roseburia hominis RefSeq                         | Roseburia hominis                    | 1485   | 0           | A2-183                    | rRNA     |         | feces                                                                                 | 1         | 1485     | TRUE    |            |         |
| NR_042090_1_1487 | 281362  | NR_042090 | Dechloromonas denitrificans strain ED1 16S ribosomal RNA, partial sequence                    | 24-Oct-17     | 4-Jan-18      | 1       |            | Dechloromonas denitrificans RefSeq               | Dechloromonas denitrificans          | 1487   | 0           | ED1                       | rRNA     |         | earthworm gut                                                                         | 1         | 1487     | TRUE    |            |         |
| NR_042181_1_1428 | 31396   | NR_042181 | Bejerinckia derxii strain DSM 2328 16S ribosomal RNA gene, partial sequence                   | 3-Feb-15      | 4-Jan-18      | 1       |            | Bejerinckia derxii RefSeq                        | Bejerinckia derxii                   | 1428   | 0           | DSM 2328                  | rRNA     |         |                                                                                       | 1         | 1428     | TRUE    |            |         |
| NR_042182_1_1429 | 231435  | NR_042182 | Bejerinckia derxii subsp. venezuelae strain DSM 2329 16S ribosomal RNA gene, partial sequence | 3-Feb-15      | 4-Jan-18      | 1       |            | Bejerinckia derxii subsp. venezuelae RefSeq      | Bejerinckia derxii subsp. venezuelae | 1429   | 0           | DSM 2329                  | rRNA     |         |                                                                                       | 1         | 1429     | TRUE    |            |         |
| NR_042240_1_1427 | 265175  | NR_042240 | Kingella potus strain 3/SID/1128 16S ribosomal RNA, partial sequence                          | 24-Oct-17     | 4-Jan-18      | 1       |            | Kingella potus RefSeq                            | Kingella potus                       | 1427   | 0           | 3/SID/1128                | rRNA     |         |                                                                                       | 1         | 1427     | TRUE    |            |         |
| NR_042358_1_1354 | 302401  | NR_042358 | Mesorhizobium thioangiteticum strain SJT 16S ribosomal RNA, partial sequence                  | 24-Oct-17     | 4-Jan-18      | 1       |            | Mesorhizobium thioangiteticum RefSeq             | Mesorhizobium thioangiteticum        | 1354   | 0           | SJT                       | rRNA     |         | soil                                                                                  | 1         | 1354     | TRUE    |            |         |
| NR_042819_1_1511 | 337779  | NR_042819 | Dechloromonas hortensis strain MA-1 16S ribosomal RNA gene, partial sequence                  | 3-Feb-15      | 4-Jan-18      | 1       |            | Dechloromonas hortensis RefSeq                   | Dechloromonas hortensis              | 1511   | 0           | MA-1                      | rRNA     |         |                                                                                       | 1         | 1511     | TRUE    |            |         |
| NR_042840_1_1429 | 883107  | NR_042840 | Eggerthella sinensis strain HKU14 16S ribosomal RNA gene, partial sequence                    | 3-Feb-15      | 4-Jan-18      | 1       |            | Eggerthella sinensis RefSeq                      | Eggerthella sinensis JCM 14551       | 1429   | 0           | HKU14                     | rRNA     |         |                                                                                       | 1         | 1429     | TRUE    |            |         |
| NR_042883_1_1364 | 667128  | NR_042883 | Pasteurella dagmatis strain CCGU 12397 16S ribosomal RNA gene, partial sequence               | 3-Feb-15      | 4-Jan-18      | 1       |            | Pasteurella dagmatis ATCC 43325 RefSeq           | Pasteurella dagmatis ATCC 43325      | 1364   | 0           | CCGU 12397                | rRNA     |         |                                                                                       | 1         | 1364     | TRUE    |            |         |
| NR_042889_1_1371 | 1122938 | NR_042889 | Pasteurella testudinis strain DSM 23072 16S ribosomal RNA gene, partial sequence              | 3-Feb-15      | 4-Jan-18      | 1       |            | Pasteurella testudinis DSM 23072 RefSeq          | Pasteurella testudinis DSM 23072     | 1371   | 0           | DSM 23072                 | rRNA     |         |                                                                                       | 1         | 1371     | TRUE    |            |         |
| NR_042989_1_1449 | 269144  | NR_042989 | Nesterenkonia aethiops strain DSM 17733 16S ribosomal RNA gene, partial sequence              | 3-Feb-15      | 4-Jan-18      | 1       |            | Nesterenkonia aethiops RefSeq                    | Nesterenkonia aethiops               | 1449   | 0           | DSM 17733                 | rRNA     |         |                                                                                       | 1         | 1449     | TRUE    |            |         |
| NR_043029_1_1486 | 1235441 | NR_043029 | Nocardiopepsis gliva strain YIM 90087 16S ribosomal RNA gene, partial sequence                | 3-Feb-15      | 4-Jan-18      | 1       |            | Nocardiopepsis gliva YIM 90087 RefSeq            | Nocardiopepsis gliva YIM 90087       | 1486   | 0           | YIM 90087                 | rRNA     |         |                                                                                       | 1         | 1486     | TRUE    |            |         |
| NR_043077_1_1493 | 285106  | NR_043077 | Tepidimicrobium ferriphilum strain SB91 16S ribosomal RNA gene, partial sequence              | 3-Feb-15      | 4-Jan-18      | 1       |            | Tepidimicrobium ferriphilum RefSeq               | Tepidimicrobium ferriphilum          | 1493   | 0           | SB91                      | rRNA     |         |                                                                                       | 1         | 1493     | TRUE    |            |         |
| NR_043190_1_1401 | 314235  | NR_043190 | Phyllobacterium brassicacearum strain STM 196 16S ribosomal RNA gene, partial sequence        | 3-Feb-15      | 4-Jan-18      | 1       |            | Phyllobacterium brassicacearum RefSeq            | Phyllobacterium brassicacearum       | 1401   | 0           | STM 196                   | rRNA     |         |                                                                                       | 1         | 1401     | TRUE    |            |         |
| NR_043192_1_1401 | 314238  | NR_043192 | Phyllobacterium frijiense strain STM 370 16S ribosomal RNA gene, partial sequence             | 3-Feb-15      | 4-Jan-18      | 1       |            | Phyllobacterium frijiense RefSeq                 | Phyllobacterium frijiense            | 1401   | 0           | STM 370                   | rRNA     |         |                                                                                       | 1         | 1401     | TRUE    |            |         |
| NR_043193_1_1478 | 300193  | NR_043193 | Phyllobacterium trifolii strain PETP02 16S ribosomal RNA, partial sequence                    | 24-Oct-17     | 4-Jan-18      | 1       |            | Phyllobacterium trifolii RefSeq                  | Phyllobacterium trifolii             | 1478   | 0           | PETP02                    | rRNA     |         |                                                                                       | 1         | 1478     | TRUE    |            |         |
| NR_043279_1_1480 | 317018  | NR_043279 | Nesterenkonia jeotgali strain JG-241 16S ribosomal RNA gene, partial sequence                 | 3-Feb-15      | 4-Jan-18      | 1       |            | Nesterenkonia jeotgali RefSeq                    | Nesterenkonia jeotgali               | 1480   | 0           | JG-241                    | rRNA     |         |                                                                                       | 1         | 1480     | TRUE    |            |         |
| NR_043582_1_1478 | 1262470 | NR_043582 | Herbaspirillum hiltneri strain N3 16S ribosomal RNA gene, partial sequence                    | 3-Feb-15      | 4-Jan-18      | 1       |            | Herbaspirillum hiltneri N3 RefSeq                | Herbaspirillum hiltneri N3           | 1478   | 0           | N3                        | rRNA     |         |                                                                                       | 1         | 1478     | TRUE    |            |         |
| NR_043621_1_1488 | 346179  | NR_043621 | Herbaspirillum rhizosphaerae strain UMS-37 16S ribosomal RNA gene, partial sequence           | 3-Feb-15      | 4-Jan-18      | 1       |            | Herbaspirillum rhizosphaerae RefSeq              | Herbaspirillum rhizosphaerae         | 1488   | 0           | UMS-37                    | rRNA     |         | rhizosphere soil                                                                      | 1         | 1488     | TRUE    |            |         |
| NR_043750_1_1356 | 368603  | NR_043750 | Morganelia psychrotolerans strain U2/3 16S ribosomal RNA gene, partial sequence               | 3-Feb-15      | 4-Jan-18      | 1       |            | Morganelia psychrotolerans RefSeq                | Morganelia psychrotolerans           | 1356   | 0           | U2/3                      | rRNA     |         |                                                                                       | 1         | 1356     | TRUE    |            |         |
| NR_043790_1_1499 | 375061  | NR_043790 | Arenimonas donghaensis strain HO3-R19 16S ribosomal RNA gene, partial sequence                | 3-Feb-15      | 4-Jan-18      | 1       |            | Arenimonas donghaensis RefSeq                    | Arenimonas donghaensis               | 1499   | 0           | HO3-R19                   | rRNA     |         |                                                                                       | 1         | 1499     | TRUE    |            |         |
| NR_043795_1_1460 | 374858  | NR_043795 | Zoogloeia caeni strain EMB43 16S ribosomal RNA gene, partial sequence                         | 3-Feb-15      | 4-Jan-18      | 1       |            | Zoogloeia caeni RefSeq                           | Zoogloeia caeni                      | 1460   | 0           | EMB43                     | rRNA     |         |                                                                                       | 1         | 1460     | TRUE    |            |         |
| NR_043983_1_1501 | 398257  | NR_043983 | Luteimonas compositi strain CC-Y255 16S ribosomal RNA gene, partial sequence                  | 3-Feb-15      | 4-Jan-18      | 1       |            | Luteimonas compositi RefSeq                      | Luteimonas compositi                 | 1501   | 0           | CC-Y255                   |          |         |                                                                                       |           |          |         |            |         |



| seqname          | tax_id  | accession | description                                                                             | modified_date | download_date | version_num | source                              | keywords | organism                            | length | ambig_count | strain        | mol_type | isolate                                                                                        | isolation_source | seq_start | seq_stop | is_type | collection | species |
|------------------|---------|-----------|-----------------------------------------------------------------------------------------|---------------|---------------|-------------|-------------------------------------|----------|-------------------------------------|--------|-------------|---------------|----------|------------------------------------------------------------------------------------------------|------------------|-----------|----------|---------|------------|---------|
| NR_07427_1_1475  | 199596  | NR_074237 | Methylocella silvestris strain B12 16S ribosomal RNA, partial sequence                  | 24-Oct-17     | 4-Jan-18      | 1           | Methylocella silvestris             | RefSeq   | Methylocella silvestris             | 1475   | 0           | B12           | rRNA     |                                                                                                |                  | 1         | 1475     | TRUE    |            |         |
| NR_07448_1_1506  | 34105   | NR_074449 | Streptobacillus moniliformis strain DSM 12112 16S ribosomal RNA, partial sequence       | 24-Oct-17     | 4-Jan-18      | 1           | Streptobacillus moniliformis        | RefSeq   | Streptobacillus moniliformis        | 1506   | 0           | DSM 12112     | rRNA     |                                                                                                |                  | 1         | 1506     | TRUE    |            |         |
| NR_074928_1_1545 | 905     | NR_074928 | Acidaminococcus fermentans strain DSM 20731 16S ribosomal RNA, partial sequence         | 24-Oct-17     | 4-Jan-18      | 1           | Acidaminococcus fermentans          | RefSeq   | Acidaminococcus fermentans          | 1545   | 0           | DSM 20731     | rRNA     |                                                                                                |                  | 1         | 1545     | TRUE    |            |         |
| NR_075044_1_1565 | 2734    | NR_075044 | Symbiobacterium thermophilum strain IAM 14863 16S ribosomal RNA, complete sequence      | 25-Oct-17     | 4-Jan-18      | 2           | Symbiobacterium thermophilum        | RefSeq   | Symbiobacterium thermophilum        | 1565   | 0           | IAM 14863     | rRNA     |                                                                                                |                  | 1         | 1565     | TRUE    |            |         |
| NR_104556_1_1444 | 657276  | NR_104556 | Vogesella mureinovorans strain 389 16S ribosomal RNA gene, partial sequence             | 3-Feb-15      | 4-Jan-18      | 1           | Vogesella mureinovorans             | RefSeq   | Vogesella mureinovorans             | 1444   | 3           | 389           | rRNA     | mesotrophic lake water                                                                         |                  | 1         | 1444     | TRUE    |            |         |
| NR_104696_1_1463 | 29358   | NR_104696 | [Clostridium] ghonii strain JCM 1400 16S ribosomal RNA gene, partial sequence           | 3-Feb-15      | 4-Jan-18      | 1           | [Clostridium] ghonii                | RefSeq   | [Clostridium] ghonii                | 1463   | 0           | JCM 1400      | rRNA     |                                                                                                |                  | 1         | 1463     | TRUE    |            |         |
| NR_104716_1_1475 | 13076   | NR_104716 | Globicatella sanguinis strain 1152-78 16S ribosomal RNA gene, partial sequence          | 3-Feb-15      | 4-Jan-18      | 1           | Globicatella sanguinis              | RefSeq   | Globicatella sanguinis              | 1475   | 2           | 1152-78       | rRNA     |                                                                                                |                  | 1         | 1475     | TRUE    |            |         |
| NR_104718_1_1453 | 1015    | NR_104718 | Bergeyella zoohelcum strain D658 16S ribosomal RNA gene, partial sequence               | 3-Feb-15      | 4-Jan-18      | 1           | Bergeyella zoohelcum                | RefSeq   | Bergeyella zoohelcum                | 1453   | 0           | D658          | rRNA     |                                                                                                |                  | 1         | 1453     | TRUE    |            |         |
| NR_104794_1_1513 | 1210046 | NR_104794 | Janibacter hoylei strain PVAS-1 16S ribosomal RNA gene, partial sequence                | 3-Feb-15      | 4-Jan-18      | 1           | Janibacter hoylei PVAS-1            | RefSeq   | Janibacter hoylei PVAS-1            | 1513   | 0           | PVAS-1        | rRNA     |                                                                                                |                  | 1         | 1513     | TRUE    |            |         |
| NR_104863_1_1549 | 86957   | NR_104863 | Selenomonas lactiflora strain VB4b 16S ribosomal RNA gene, partial sequence             | 3-Feb-15      | 4-Jan-18      | 1           | Selenomonas lactiflora              | RefSeq   | Selenomonas lactiflora              | 1549   | 0           | VB4b          | rRNA     |                                                                                                |                  | 1         | 1549     | TRUE    |            |         |
| NR_108191_1_1405 | 490570  | NR_108191 | Phycoccus ginsenosidimutans strain BXNS-13 16S ribosomal RNA gene, partial sequence     | 3-Feb-15      | 4-Jan-18      | 1           | Phycoccus ginsenosidimutans         | RefSeq   | Phycoccus ginsenosidimutans         | 1405   | 0           | BXNS-13       | rRNA     | soil of ginseng field                                                                          |                  | 1         | 1405     | TRUE    |            |         |
| NR_108216_1_1408 | 551987  | NR_108216 | Duganella sacchari strain Sac-22 16S ribosomal RNA gene, partial sequence               | 3-Feb-15      | 4-Jan-18      | 1           | Duganella sacchari                  | RefSeq   | Duganella sacchari                  | 1408   | 0           | Sac-22        | rRNA     |                                                                                                |                  | 1         | 1408     | TRUE    |            |         |
| NR_108529_1_1357 | 762836  | NR_108529 | Duganella phylosphaerae strain TS4 16S ribosomal RNA gene, partial sequence             | 3-Feb-15      | 4-Jan-18      | 1           | Duganella phylosphaerae             | RefSeq   | Duganella phylosphaerae             | 1357   | 0           | TS4           | rRNA     |                                                                                                |                  | 1         | 1357     | TRUE    |            |         |
| NR_108542_1_1400 | 659017  | NR_108542 | Shiella daejeonensis strain MJ02 16S ribosomal RNA gene, partial sequence               | 3-Feb-15      | 4-Jan-18      | 1           | Shiella daejeonensis                | RefSeq   | Shiella daejeonensis                | 1400   | 0           | MJ02          | rRNA     |                                                                                                |                  | 1         | 1400     | TRUE    |            |         |
| NR_108863_1_1381 | 1076331 | NR_108863 | Arsenicoccus dermatophilus strain KM 894/11 16S ribosomal RNA gene, partial sequence    | 3-Feb-15      | 4-Jan-18      | 1           | Arsenicoccus dermatophilus          | RefSeq   | Arsenicoccus dermatophilus          | 1381   | 0           | KM 894/11     | rRNA     | host skin                                                                                      |                  | 1         | 1381     | TRUE    |            |         |
| NR_108891_1_1362 | 1193621 | NR_108891 | Vogesella alkaliphila strain JC141 16S ribosomal RNA gene, partial sequence             | 3-Feb-15      | 4-Jan-18      | 1           | Vogesella alkaliphila               | RefSeq   | Vogesella alkaliphila               | 1362   | 0           | JC141         | rRNA     | B4 soil                                                                                        |                  | 1         | 1362     | TRUE    |            |         |
| NR_108898_1_1451 | 759929  | NR_108898 | Inhella fonticola strain TNR-25 16S ribosomal RNA gene, partial sequence                | 3-Feb-15      | 4-Jan-18      | 1           | Inhella fonticola                   | RefSeq   | Inhella fonticola                   | 1451   | 0           | TNR-25        | rRNA     | stream water                                                                                   |                  | 1         | 1451     | TRUE    |            |         |
| NR_109160_1_1498 | 942865  | NR_109160 | Cupriavidus plantarum strain ASC-64 16S ribosomal RNA, partial sequence                 | 15-Jan-16     | 4-Jan-18      | 1           | Cupriavidus plantarum               | RefSeq   | Cupriavidus plantarum               | 1498   | 0           | ASC-64        | rRNA     | soil rhizosphere                                                                               |                  | 1         | 1498     | TRUE    |            |         |
| NR_112173_1_1461 | 1505    | NR_112173 | [Clostridium] sordellii strain ATCC 9714 16S ribosomal RNA gene, partial sequence       | 3-Feb-15      | 4-Jan-18      | 1           | [Clostridium] sordellii             | RefSeq   | [Clostridium] sordellii             | 1461   | 1           | ATCC 9714     | rRNA     |                                                                                                |                  | 1         | 1461     | TRUE    |            |         |
| NR_112219_1_1425 | 31996   | NR_112219 | Bejerinckia derxii strain ATCC 49361 16S ribosomal RNA, partial sequence                | 24-Oct-17     | 4-Jan-18      | 1           | Bejerinckia derxii                  | RefSeq   | Bejerinckia derxii                  | 1425   | 0           | ATCC 49361    | rRNA     |                                                                                                |                  | 1         | 1425     | TRUE    |            |         |
| NR_112622_1_1435 | 398038  | NR_112622 | Chitinophaga soli strain Gsoil 219 16S ribosomal RNA gene, partial sequence             | 3-Feb-15      | 4-Jan-18      | 1           | Chitinophaga soli                   | RefSeq   | Chitinophaga soli                   | 1435   | 0           | Gsoil 219     | rRNA     | soil of the ginseng field                                                                      |                  | 1         | 1435     | TRUE    |            |         |
| NR_112624_1_1421 | 400775  | NR_112624 | Caulobacter ginsengisoli strain Gsoil 317 16S ribosomal RNA gene, partial sequence      | 3-Feb-15      | 4-Jan-18      | 1           | Caulobacter ginsengisoli            | RefSeq   | Caulobacter ginsengisoli            | 1421   | 1           | Gsoil 317     | rRNA     | soil of ginseng field                                                                          |                  | 1         | 1421     | TRUE    |            |         |
| NR_112626_1_1477 | 202750  | NR_112626 | Kurthia sibirica strain NBRC 101530 16S ribosomal RNA gene, partial sequence            | 3-Feb-15      | 4-Jan-18      | 1           | Kurthia sibirica                    | RefSeq   | Kurthia sibirica                    | 1477   | 0           | NBRC 101530   | rRNA     |                                                                                                |                  | 1         | 1477     | TRUE    |            |         |
| NR_112713_1_1443 | 1313171 | NR_112713 | Ilumabacter nonamiensis strain YM16-303 16S ribosomal RNA gene, partial sequence        | 3-Feb-15      | 4-Jan-18      | 1           | Ilumabacter nonamiensis YM16-303    | RefSeq   | Ilumabacter nonamiensis YM16-303    | 1443   | 0           | YM16-303      | rRNA     | sand                                                                                           |                  | 1         | 1443     | TRUE    |            |         |
| NR_112832_1_1375 | 573737  | NR_112832 | Pandoraea oxalativorans strain TA25 16S ribosomal RNA gene, partial sequence            | 3-Feb-15      | 4-Jan-18      | 1           | Pandoraea oxalativorans             | RefSeq   | Pandoraea oxalativorans             | 1375   | 0           | TA25          | rRNA     | Soil litter close to Oxalis sp.                                                                |                  | 1         | 1375     | TRUE    |            |         |
| NR_113140_1_1463 | 1505    | NR_113140 | [Clostridium] sordellii strain JCM 3814 16S ribosomal RNA gene, partial sequence        | 3-Feb-15      | 4-Jan-18      | 1           | [Clostridium] sordellii             | RefSeq   | [Clostridium] sordellii             | 1463   | 0           | JCM 3814      | rRNA     |                                                                                                |                  | 1         | 1463     | TRUE    |            |         |
| NR_113322_1_1462 | 987056  | NR_113322 | Rhododitrothopos appendicifer strain ATCC BAA-2115 16S ribosomal RNA, partial sequence  | 24-Oct-17     | 4-Jan-18      | 1           | Rhododitrothopos appendicifer       | RefSeq   | Rhododitrothopos appendicifer       | 1462   | 0           | ATCC BAA-2115 | rRNA     | lake-water sample                                                                              |                  | 1         | 1462     | TRUE    |            |         |
| NR_113364_1_1418 | 1017181 | NR_113364 | Glucanacetobacter asukensis strain K8617-1-1b 16S ribosomal RNA gene, partial sequence  | 3-Feb-15      | 4-Jan-18      | 1           | Glucanacetobacter asukensis         | RefSeq   | Glucanacetobacter asukensis         | 1418   | 1           | K8617-1-1b    | rRNA     | Brown viscous gels on northeast area of the ceiling in the stone chamber of the Kitora Tumulus |                  | 1         | 1418     | TRUE    |            |         |
| NR_113563_1_1477 | 1018    | NR_113563 | Capnocytophaga ochracea strain JCM 12966 16S ribosomal RNA gene, partial sequence       | 3-Feb-15      | 4-Jan-18      | 1           | Capnocytophaga ochracea             | RefSeq   | Capnocytophaga ochracea             | 1477   | 0           | JCM 12966     | rRNA     |                                                                                                |                  | 1         | 1477     | TRUE    |            |         |
| NR_113564_1_1477 | 1019    | NR_113564 | Capnocytophaga sputigena strain JCM 12967 16S ribosomal RNA gene, partial sequence      | 3-Feb-15      | 4-Jan-18      | 1           | Capnocytophaga sputigena            | RefSeq   | Capnocytophaga sputigena            | 1477   | 0           | JCM 12967     | rRNA     |                                                                                                |                  | 1         | 1477     | TRUE    |            |         |
| NR_113607_1_1406 | 359     | NR_113607 | Agrobacterium rhizogenes strain NBRC 13257 16S ribosomal RNA gene, partial sequence     | 3-Feb-15      | 4-Jan-18      | 1           | Agrobacterium rhizogenes            | RefSeq   | Agrobacterium rhizogenes            | 1406   | 0           | NBRC 13257    | rRNA     |                                                                                                |                  | 1         | 1406     | TRUE    |            |         |
| NR_113608_1_1410 | 28099   | NR_113608 | Agrobacterium rubi strain NBRC 13261 16S ribosomal RNA gene, partial sequence           | 3-Feb-15      | 4-Jan-18      | 1           | Agrobacterium rubi                  | RefSeq   | Agrobacterium rubi                  | 1410   | 0           | NBRC 13261    | rRNA     |                                                                                                |                  | 1         | 1410     | TRUE    |            |         |
| NR_113725_1_1451 | 1004    | NR_113725 | Chitinophaga sancti strain NBRC 15057 16S ribosomal RNA gene, partial sequence          | 3-Feb-15      | 4-Jan-18      | 1           | Chitinophaga sancti                 | RefSeq   | Chitinophaga sancti                 | 1451   | 0           | NBRC 15057    | rRNA     |                                                                                                |                  | 1         | 1451     | TRUE    |            |         |
| NR_113747_1_1458 | 180195  | NR_113747 | Herbaspirillum autotrophicum strain NBRC 15327 16S ribosomal RNA gene, partial sequence | 3-Feb-15      | 4-Jan-18      | 1           | Herbaspirillum autotrophicum        | RefSeq   | Herbaspirillum autotrophicum        | 1458   | 0           | NBRC 15327    | rRNA     |                                                                                                |                  | 1         | 1458     | TRUE    |            |         |
| NR_113749_1_1463 | 350     | NR_113749 | Zoogloea ramigera strain NBRC 15342 16S ribosomal RNA gene, partial sequence            | 3-Feb-15      | 4-Jan-18      | 1           | Zoogloea ramigera                   | RefSeq   | Zoogloea ramigera                   | 1463   | 0           | NBRC 15342    | rRNA     |                                                                                                |                  | 1         | 1463     | TRUE    |            |         |
| NR_113829_1_1451 | 79329   | NR_113829 | Chitinophaga pinensis strain NBRC 15968 16S ribosomal RNA gene, partial sequence        | 3-Feb-15      | 4-Jan-18      | 1           | Chitinophaga pinensis               | RefSeq   | Chitinophaga pinensis               | 1451   | 5           | NBRC 15968    | rRNA     |                                                                                                |                  | 1         | 1451     | TRUE    |            |         |
| NR_113877_1_1457 | 1218073 | NR_113877 | Cupriavidus numazuensis strain NBRC 100056 16S ribosomal RNA gene, partial sequence     | 3-Feb-15      | 4-Jan-18      | 1           | Cupriavidus numazuensis NBRC 100056 | RefSeq   | Cupriavidus numazuensis NBRC 100056 | 1457   | 0           | NBRC 100056   | rRNA     |                                                                                                |                  | 1         | 1457     | TRUE    |            |         |
| NR_114035_1_1411 | 415996  | NR_114035 | Shiella yambaruensis strain NBRC 102122 16S ribosomal RNA gene, partial sequence        | 3-Feb-15      | 4-Jan-18      | 1           | Shiella yambaruensis                | RefSeq   | Shiella yambaruensis                | 1411   | 0           | NBRC 102122   | rRNA     |                                                                                                |                  | 1         | 1411     | TRUE    |            |         |
| NR_114069_1_1463 | 310767  | NR_114069 | Zoogloea oryzae strain NBRC 102407 16S ribosomal RNA gene, partial sequence             | 3-Feb-15      | 4-Jan-18      | 1           | Zoogloea oryzae                     | RefSeq   | Zoogloea oryzae                     | 1463   | 0           | NBRC 102407   | rRNA     |                                                                                                |                  | 1         | 1463     | TRUE    |            |         |
| NR_114101_1_1467 | 211502  | NR_114101 | Conchiformibius kuhniae strain NBRC 102458 16S ribosomal RNA gene, partial sequence     | 3-Feb-15      | 4-Jan-18      | 1           | Conchiformibius kuhniae             | RefSeq   | Conchiformibius kuhniae             | 1467   | 8           | NBRC 102458   | rRNA     |                                                                                                |                  | 1         | 1467     | TRUE    |            |         |
| NR_114106_1_1456 | 75659   | NR_114106 | Duganella zooglooides strain NBRC 102465 16S ribosomal RNA gene, partial sequence       | 3-Feb-15      | 4-Jan-18      | 1           | Duganella zooglooides               | RefSeq   | Duganella zooglooides               | 1456   | 0           | NBRC 102465   | rRNA     |                                                                                                |                  | 1         | 1456     | TRUE    |            |         |
| NR_114274_1_1442 | 517423  | NR_114274 | Cloacibacterium rupense strain NBRC 104931 16S ribosomal RNA gene, partial sequence     | 3-Feb-15      | 4-Jan-18      | 1           | Cloacibacterium rupense             | RefSeq   | Cloacibacterium rupense             | 1442   | 0           | NBRC 104931   | rRNA     |                                                                                                |                  | 1         | 1442     | TRUE    |            |         |
| NR_114589_1_1437 | 1006000 | NR_114589 | Kluyvera ascorbata strain ATCC 33433 16S ribosomal RNA gene, partial sequence           | 3-Feb-15      | 4-Jan-18      | 1           | Kluyvera ascorbata ATCC 33433       | RefSeq   | Kluyvera ascorbata ATCC 33433       | 1437   | 0           | ATCC 33433    | rRNA     |                                                                                                |                  | 1         | 1437     | TRUE    |            |         |
| NR_114712_1_1446 | 114     | NR_114712 | Gemmata obscuriglobus strain DSM 5831 16S ribosomal RNA gene, partial sequence          | 3-Feb-15      | 4-Jan-18      | 1           | Gemmata obscuriglobus               | RefSeq   | Gemmata obscuriglobus               | 1446   | 0           | DSM 5831      | rRNA     |                                                                                                |                  | 1         | 1446     | TRUE    |            |         |
| NR_114720_1_1479 | 964     | NR_114720 | Herbaspirillum seropedicae strain 267 16S ribosomal RNA gene, partial sequence          | 3-Feb-15      | 4-Jan-18      | 1           | Herbaspirillum seropedicae          | RefSeq   | Herbaspirillum seropedicae          | 1479   | 0           | 267           | rRNA     |                                                                                                |                  | 1         | 1479     | TRUE    |            |         |
| NR_114902_1_1518 | 232346  | NR_114902 | Halomonas alkaliantartica strain CR55 16S ribosomal RNA, partial sequence               | 24-Oct-17     | 4-Jan-18      | 1           | Halomonas alkaliantartica           | RefSeq   | Halomonas alkaliantartica           | 1518   | 0           | CR55          | rRNA     | mud from lake                                                                                  |                  | 1         | 1518     | TRUE    |            |         |
| NR_115090_1_1455 | 502832  | NR_115090 | Halomonas johnsoniae strain T68687 16S ribosomal RNA gene, partial sequence             | 3-Feb-15      | 4-Jan-18      | 1           | Halomonas johnsoniae                | RefSeq   | Halomonas johnsoniae                | 1455   | 0           | T68687        | rRNA     |                                                                                                |                  | 1         | 1455     | TRUE    |            |         |
| NR_115187_1_1461 | 93219   | NR_115187 | Pandoraea norimbergensis strain CCUG 39188 16S ribosomal RNA gene, partial sequence     | 3-Feb-15      | 4-Jan-18      | 1           | Pandoraea norimbergensis            | RefSeq   | Pandoraea norimbergensis            | 1461   | 0           | CCUG 39188    | rRNA     |                                                                                                |                  | 1         | 1461     | TRUE    |            |         |
| NR_115198_1_1475 | 1205673 | NR_115198 | Paenibacillus timonensis strain 2301032 16S ribosomal RNA gene, partial sequence        | 3-Feb-15      | 4-Jan-18      | 1           | Paenibacillus timonensis 2301032    | RefSeq   | Paenibacillus timonensis 2301032    | 1475   | 0           | 2301032       | rRNA     |                                                                                                |                  | 1         | 1475     | TRUE    |            |         |
| NR_115224_1_1363 | 255519  | NR_115224 | Salmonella subterranea strain FRCI 16S ribosomal RNA, partial sequence                  | 11-Jul-16     | 4-Jan-18      | 1           | Atlantibacter subterranea           | RefSeq   | Atlantibacter subterranea           | 1363   | 0           | FRCI          | rRNA     |                                                                                                |                  | 1         | 1363     | TRUE    |            |         |
| NR_115324_1_1401 | 314237  | NR_115324 | Phyllobacterium leguminum strain ORS 1419 16S ribosomal RNA gene, partial sequence      | 3-Feb-15      | 4-Jan-18      | 1           | Phyllobacterium leguminum           | RefSeq   | Phyllobacterium leguminum           | 1401   | 0           | ORS 1419      | rRNA     |                                                                                                |                  | 1         | 1401     | TRUE    |            |         |
| NR_115352_1_1415 | 323621  | NR_115352 | Shiella granuli strain CH06 16S ribosomal RNA gene, partial sequence                    | 3-Feb-15      | 4-Jan-18      | 1           | Shiella granuli                     | RefSeq   | Shiella granuli                     | 1415   | 0           | CH06          | rRNA     | granule sludge                                                                                 |                  | 1         | 1415     | TRUE    |            |         |
| NR_115742_1_1378 | 363953  | NR_115742 | Chelatococcus sambhunathii strain HT4 16S ribosomal RNA gene, partial sequence          | 3-Feb-15      | 4-Jan-18      | 1           | Chelatococcus samb                  |          |                                     |        |             |               |          |                                                                                                |                  |           |          |         |            |         |

| seqname          | tax_id  | accession | description                                                                                  | modified_date | download_date | version | num_soles | keywords                             | organism | length | ambig_count | strain          | mol_type | isolate                                   | isolation_source | seq_start | seq_stop | is_type | collection | species |
|------------------|---------|-----------|----------------------------------------------------------------------------------------------|---------------|---------------|---------|-----------|--------------------------------------|----------|--------|-------------|-----------------|----------|-------------------------------------------|------------------|-----------|----------|---------|------------|---------|
| NR_116938_1_1428 | 997349  | NR_116938 | Olsenella profusa strain DSM 13989 16S ribosomal RNA gene, partial sequence                  | 3-Feb-15      | 4-Jan-18      | 1       |           | Olsenella profusa DSM 13989          | RefSeq   | 1428   | 0           | DSM 13989       | rRNA     |                                           |                  | 1         | 1428     | TRUE    |            |         |
| NR_116996_1_1409 | 663610  | NR_116996 | Methylocapsa aurea strain KYG 16S ribosomal RNA gene, partial sequence                       | 3-Feb-15      | 4-Jan-18      | 1       |           | Methylocapsa aurea                   | RefSeq   | 1409   | 0           | KYG             | rRNA     | forest soil                               |                  | 1         | 1409     | TRUE    |            |         |
| NR_117018_1_1392 | 96344   | NR_117018 | Cupriavidus oxalaticus strain CCUG 2086 16S ribosomal RNA gene, partial sequence             | 3-Feb-15      | 4-Jan-18      | 1       |           | Cupriavidus oxalaticus               | RefSeq   | 1392   | 1           | CCUG 2086       | rRNA     |                                           |                  | 1         | 1392     | TRUE    |            |         |
| NR_117044_1_1424 | 763993  | NR_117044 | Pseudokineococcus lusitanus strain TZA-527 16S ribosomal RNA gene, partial sequence          | 3-Feb-15      | 4-Jan-18      | 1       |           | Pseudokineococcus lusitanus          | RefSeq   | 1424   | 0           | TZA-527         | rRNA     | roof tile                                 |                  | 1         | 1424     | TRUE    |            |         |
| NR_117126_1_1525 | 1544    | NR_117126 | [Clostridium] oroticum strain DSM 1287 16S ribosomal RNA gene, partial sequence              | 3-Feb-15      | 4-Jan-18      | 1       |           | Faecalicatena orotica                | RefSeq   | 1525   | 0           | DSM 1287        | rRNA     |                                           |                  | 1         | 1525     | TRUE    |            |         |
| NR_117129_1_1525 | 1544    | NR_117129 | [Clostridium] oroticum strain DSM 1287 16S ribosomal RNA gene, partial sequence              | 3-Feb-15      | 4-Jan-18      | 1       |           | Faecalicatena orotica                | RefSeq   | 1525   | 0           | DSM 1287        | rRNA     |                                           |                  | 1         | 1525     | TRUE    |            |         |
| NR_117131_1_1526 | 1544    | NR_117131 | [Clostridium] oroticum strain DSM 1287 16S ribosomal RNA gene, partial sequence              | 3-Feb-15      | 4-Jan-18      | 1       |           | Faecalicatena orotica                | RefSeq   | 1526   | 0           | DSM 1287        | rRNA     |                                           |                  | 1         | 1526     | TRUE    |            |         |
| NR_117142_1_1523 | 290055  | NR_117142 | [Eubacterium] fissicatena strain DSM 3598 16S ribosomal RNA gene, partial sequence           | 3-Feb-15      | 4-Jan-18      | 1       |           | Faecalicatena fissicatena            | RefSeq   | 1523   | 0           | DSM 3598        | rRNA     |                                           |                  | 1         | 1523     | TRUE    |            |         |
| NR_117376_1_1415 | 43131   | NR_117376 | Tissierella praeacuta strain ATCC 25539 16S ribosomal RNA gene, partial sequence             | 3-Feb-15      | 4-Jan-18      | 1       |           | Tissierella praeacuta                | RefSeq   | 1415   | 0           | ATCC 25539      | rRNA     |                                           |                  | 1         | 1415     | TRUE    |            |         |
| NR_117377_1_1400 | 79681   | NR_117377 | Tissierella creatinophila strain DSM 6911 16S ribosomal RNA gene, partial sequence           | 3-Feb-15      | 4-Jan-18      | 1       |           | Tissierella creatinophila            | RefSeq   | 1400   | 0           | DSM 6911        | rRNA     |                                           |                  | 1         | 1400     | TRUE    |            |         |
| NR_117380_1_1473 | 285106  | NR_117380 | Tepidimicrobium ferriphilum strain DSM 16624 16S ribosomal RNA gene, partial sequence        | 3-Feb-15      | 4-Jan-18      | 1       |           | Tepidimicrobium ferriphilum          | RefSeq   | 1473   | 0           | DSM 16624       | rRNA     |                                           |                  | 1         | 1473     | TRUE    |            |         |
| NR_117700_1_1512 | 106147  | NR_117700 | Pelitestegia europaea strain N57 16S ribosomal RNA gene, partial sequence                    | 3-Feb-15      | 4-Jan-18      | 1       |           | Pelitestegia europaea                | RefSeq   | 1512   | 1           | N57             | rRNA     |                                           |                  | 1         | 1512     | TRUE    |            |         |
| NR_117723_1_1545 | 1406    | NR_117723 | Paenibacillus polymyxa strain DSM 36 16S ribosomal RNA, partial sequence                     | 28-Oct-15     | 4-Jan-18      | 2       |           | Paenibacillus polymyxa               | RefSeq   | 1545   | 0           | DSM 36          | rRNA     |                                           |                  | 1         | 1545     | TRUE    |            |         |
| NR_117758_1_1329 | 166486  | NR_117758 | Roseburia intestinalis strain DSM 14610 16S ribosomal RNA gene, partial sequence             | 3-Feb-15      | 4-Jan-18      | 1       |           | Roseburia intestinalis               | RefSeq   | 1329   | 3           | DSM 14610       | rRNA     |                                           |                  | 1         | 1329     | TRUE    |            |         |
| NR_117794_1_1424 | 386803  | NR_117794 | Morganella psychrotolerans strain U2/3 16S ribosomal RNA gene, partial sequence              | 3-Feb-15      | 4-Jan-18      | 1       |           | Morganella psychrotolerans           | RefSeq   | 1424   | 0           | U2/3            | rRNA     |                                           |                  | 1         | 1424     | TRUE    |            |         |
| NR_118040_1_1525 | 1064517 | NR_118040 | Noviherbaspirillum aurantiacum strain SUEM108 16S ribosomal RNA gene, partial sequence       | 3-Feb-15      | 4-Jan-18      | 1       |           | Noviherbaspirillum aurantiacum       | RefSeq   | 1525   | 2           | SUEM108         | rRNA     | soil                                      |                  | 1         | 1525     | TRUE    |            |         |
| NR_118181_1_1358 | 112140  | NR_118181 | Glucocetobacter johannae strain DSM 13595 16S ribosomal RNA gene, partial sequence           | 3-Feb-15      | 4-Jan-18      | 1       |           | Glucocetobacter johannae             | RefSeq   | 1358   | 0           | DSM 13595       | rRNA     |                                           |                  | 1         | 1358     | TRUE    |            |         |
| NR_118183_1_1354 | 89584   | NR_118183 | Glucocetobacter liquefaciens strain DSM 5603 16S ribosomal RNA gene, partial sequence        | 3-Feb-15      | 4-Jan-18      | 1       |           | Glucocetobacter liquefaciens         | RefSeq   | 1354   | 0           | DSM 5603        | rRNA     |                                           |                  | 1         | 1354     | TRUE    |            |         |
| NR_118218_1_1471 | 1033739 | NR_118218 | Kurthia massiliensis strain JC30 16S ribosomal RNA gene, partial sequence                    | 3-Feb-15      | 4-Jan-18      | 1       |           | Kurthia massiliensis                 | RefSeq   | 1471   | 2           | JC30            | rRNA     |                                           |                  | 1         | 1471     | TRUE    |            |         |
| NR_118554_1_1475 | 1297617 | NR_118554 | Intestinimonas butyriciproducens strain SRB-521-5-1 16S ribosomal RNA gene, partial sequence | 3-Feb-15      | 4-Jan-18      | 1       |           | Intestinimonas butyriciproducens     | RefSeq   | 1475   | 0           | SRB-521-5-1     | rRNA     | Mouse caecum                              |                  | 1         | 1475     | TRUE    |            |         |
| NR_118641_1_1529 | 1441821 | NR_118641 | Helcococcus seattlensis strain F5780 16S ribosomal RNA gene, partial sequence                | 3-Feb-15      | 4-Jan-18      | 1       |           | Helcococcus seattlensis              | RefSeq   | 1529   | 3           | F5780           | rRNA     |                                           |                  | 1         | 1529     | TRUE    |            |         |
| NR_118697_1_1475 | 504     | NR_118697 | Kingella kingae strain ATCC 23330 16S ribosomal RNA, partial sequence                        | 24-Oct-17     | 4-Jan-18      | 1       |           | Kingella kingae                      | RefSeq   | 1475   | 8           | ATCC 23330      | rRNA     |                                           |                  | 1         | 1475     | TRUE    |            |         |
| NR_118724_1_1483 | 1044    | NR_118724 | Erythrobacter longus strain OCH101 16S ribosomal RNA, partial sequence                       | 25-Oct-17     | 4-Jan-18      | 2       |           | Erythrobacter longus                 | RefSeq   | 1483   | 7           | UCH101          | rRNA     |                                           |                  | 1         | 1483     | TRUE    |            |         |
| NR_118729_1_1432 | 1544    | NR_118729 | Faecalicatena orotica strain ATCC 13619 16S ribosomal RNA, partial sequence                  | 27-Oct-17     | 4-Jan-18      | 2       |           | Faecalicatena orotica                | RefSeq   | 1482   | 9           | ATCC 13619      | rRNA     |                                           |                  | 1         | 1482     | TRUE    |            |         |
| NR_118812_1_1425 | 45498   | NR_118812 | Helicobacter cholecystus strain Hkb-1 16S ribosomal RNA, partial sequence                    | 24-Oct-17     | 4-Jan-18      | 1       |           | Helicobacter cholecystus             | RefSeq   | 1425   | 2           | Hkb-1           | rRNA     |                                           |                  | 1         | 1425     | TRUE    |            |         |
| NR_118911_1_1491 | 114     | NR_118911 | Gemmata obscuriglobus strain UQM 2246 16S ribosomal RNA, partial sequence                    | 24-Oct-17     | 4-Jan-18      | 1       |           | Gemmata obscuriglobus                | RefSeq   | 1491   | 9           | UQM 2246        | rRNA     |                                           |                  | 1         | 1491     | TRUE    |            |         |
| NR_119036_1_1495 | 29358   | NR_119036 | Paeniclostridium ghonei strain NCIMB 10636 16S ribosomal RNA, partial sequence               | 24-Oct-17     | 4-Jan-18      | 1       |           | Paeniclostridium ghonei              | RefSeq   | 1495   | 2           | NCIMB 10636     | rRNA     |                                           |                  | 1         | 1495     | TRUE    |            |         |
| NR_119111_1_1475 | 43131   | NR_119111 | Tissierella praeacuta strain ATCC 25539 16S ribosomal RNA, partial sequence                  | 24-Oct-17     | 4-Jan-18      | 1       |           | Tissierella praeacuta                | RefSeq   | 1475   | 7           | ATCC 25539      | rRNA     |                                           |                  | 1         | 1475     | TRUE    |            |         |
| NR_119248_1_1514 | 106147  | NR_119248 | Pelitestegia europaea strain LMG 10982 16S ribosomal RNA gene, partial sequence              | 3-Feb-15      | 4-Jan-18      | 1       |           | Pelitestegia europaea                | RefSeq   | 1514   | 2           | LMG 10982       | rRNA     |                                           |                  | 1         | 1514     | TRUE    |            |         |
| NR_125551_1_1380 | 780887  | NR_125551 | Cyclobacterium jeungdongense strain HMD3055 16S ribosomal RNA gene, partial sequence         | 3-Feb-15      | 4-Jan-18      | 1       |           | Cyclobacterium jeungdongense         | RefSeq   | 1380   | 0           | HMD3055         | rRNA     | soil saltern                              |                  | 1         | 1380     | TRUE    |            |         |
| NR_125570_1_1395 | 796943  | NR_125570 | Oribacterium parvum strain ACB1 16S ribosomal RNA gene, partial sequence                     | 3-Feb-15      | 4-Jan-18      | 1       |           | Oribacterium parvum ACB1             | RefSeq   | 1395   | 0           | ACB1            | rRNA     | oral cavity                               |                  | 1         | 1395     | TRUE    |            |         |
| NR_125602_1_1489 | 1095769 | NR_125602 | Noviherbaspirillum massiliense strain JC206 16S ribosomal RNA gene, partial sequence         | 3-Feb-15      | 4-Jan-18      | 1       |           | Noviherbaspirillum massiliense JC206 | RefSeq   | 1489   | 0           | JC206           | rRNA     |                                           |                  | 1         | 1489     | TRUE    |            |         |
| NR_125655_1_1438 | 1280844 | NR_125655 | Cloacibacterium halotius strain W85 16S ribosomal RNA gene, partial sequence                 | 3-Feb-15      | 4-Jan-18      | 1       |           | Cloacibacterium halotius             | RefSeq   | 1438   | 0           | W85             | rRNA     |                                           |                  | 1         | 1438     | TRUE    |            |         |
| NR_132598_1_1471 | 266129  | NR_132598 | Hydrogenophaga temperata strain TR7-01 16S ribosomal RNA, partial sequence                   | 26-Aug-15     | 4-Jan-18      | 1       |           | Hydrogenophaga temperata             | RefSeq   | 1471   | 0           | TR7-01          | rRNA     | compost                                   |                  | 1         | 1471     | TRUE    |            |         |
| NR_133054_1_1415 | 689904  | NR_133054 | Tissierella carlieri strain LBN 295 16S ribosomal RNA, partial sequence                      | 2-Aug-16      | 4-Jan-18      | 1       |           | Tissierella carlieri                 | RefSeq   | 1415   | 0           | LBN 295         | rRNA     |                                           |                  | 1         | 1415     | TRUE    |            |         |
| NR_133718_1_1408 | 1193626 | NR_133718 | Celivibrio diazotrophicus strain E50 16S ribosomal RNA, partial sequence                     | 4-Dec-15      | 4-Jan-18      | 1       |           | Celivibrio diazotrophicus            | RefSeq   | 1408   | 0           | E50             | rRNA     | salt meadow                               |                  | 1         | 1408     | TRUE    |            |         |
| NR_133734_1_1402 | 1416801 | NR_133734 | Cyclobacterium halophilum strain GAS41 16S ribosomal RNA, partial sequence                   | 4-Dec-15      | 4-Jan-18      | 1       |           | Cyclobacterium halophilum            | RefSeq   | 1402   | 0           | GAS41           | rRNA     | wetland soil                              |                  | 1         | 1402     | TRUE    |            |         |
| NR_133762_1_1409 | 1096246 | NR_133762 | Hungateella effluvi strain UB-B.2 16S ribosomal RNA, partial sequence                        | 4-Dec-15      | 4-Jan-18      | 1       |           | Hungateella effluvi                  | RefSeq   | 1409   | 0           | UB-B.2          | rRNA     | probiotic industry effluent               |                  | 1         | 1409     | TRUE    |            |         |
| NR_133812_1_1480 | 1144851 | NR_133812 | Pelitestegia indica strain HM-7 16S ribosomal RNA, partial sequence                          | 4-Dec-15      | 4-Jan-18      | 1       |           | Pelitestegia indica                  | RefSeq   | 1480   | 1           | HM-7            | rRNA     | stool                                     |                  | 1         | 1480     | TRUE    |            |         |
| NR_134011_1_1457 | 1172621 | NR_134011 | Conyzicola lurida strain HWE2-01 16S ribosomal RNA, partial sequence                         | 14-Dec-15     | 4-Jan-18      | 1       |           | Conyzicola lurida                    | RefSeq   | 1457   | 6           | HWE2-01         | rRNA     | horse weed root                           |                  | 1         | 1457     | TRUE    |            |         |
| NR_134061_1_1484 | 857417  | NR_134061 | Janibacter indicus strain 0704P10-1 16S ribosomal RNA, partial sequence                      | 14-Dec-15     | 4-Jan-18      | 1       |           | Janibacter indicus                   | RefSeq   | 1484   | 0           | 0704P10-1       | rRNA     | deep-sea sediment                         |                  | 1         | 1484     | TRUE    |            |         |
| NR_134208_1_1457 | 471799  | NR_134208 | Symbiobacterium ostreiconchae strain KY38 16S ribosomal RNA, partial sequence                | 14-Dec-15     | 4-Jan-18      | 1       |           | Symbiobacterium ostreiconchae        | RefSeq   | 1487   | 0           | KY38            | rRNA     | Oyster shell                              |                  | 1         | 1487     | TRUE    |            |         |
| NR_134209_1_1484 | 557451  | NR_134209 | Symbiobacterium terrae strain KA13 16S ribosomal RNA, partial sequence                       | 14-Dec-15     | 4-Jan-18      | 1       |           | Symbiobacterium terrae               | RefSeq   | 1484   | 0           | KA13            | rRNA     | collected from barnacle                   |                  | 1         | 1484     | TRUE    |            |         |
| NR_134709_1_1405 | 1348468 | NR_134709 | Chelatococcus caeni strain EBR-4-1 16S ribosomal RNA, partial sequence                       | 15-Jan-16     | 4-Jan-18      | 1       |           | Chelatococcus caeni                  | RefSeq   | 1405   | 0           | EBR-4-1         | rRNA     |                                           |                  | 1         | 1405     | TRUE    |            |         |
| NR_135212_1_1484 | 1735285 | NR_135212 | Vogesella oryzae strain L3839 16S ribosomal RNA, partial sequence                            | 2-Aug-16      | 4-Jan-18      | 1       |           | Vogesella oryzae                     | RefSeq   | 1484   | 0           | L3839           | rRNA     | rice rhizosphere                          |                  | 1         | 1484     | TRUE    |            |         |
| NR_135716_1_1436 | 1160091 | NR_135716 | Alloscardovia macacae strain MB 16S ribosomal RNA, partial sequence                          | 28-Mar-16     | 4-Jan-18      | 1       |           | Alloscardovia macacae                | RefSeq   | 1436   | 1           | MB              | rRNA     | gait of macaque                           |                  | 1         | 1436     | TRUE    |            |         |
| NR_136465_1_1461 | 1494462 | NR_136465 | Lactococcus hilricitatis strain DSM 28960 16S ribosomal RNA, partial sequence                | 14-Apr-16     | 4-Jan-18      | 1       |           | Lactococcus hilricitatis             | RefSeq   | 1461   | 0           | DSM 28960       | rRNA     | goat milk                                 |                  | 1         | 1461     | TRUE    |            |         |
| NR_136478_1_1415 | 1384509 | NR_136478 | Streptobacillus felis strain 131000547 16S ribosomal RNA, partial sequence                   | 14-Apr-16     | 4-Jan-18      | 1       |           | Streptobacillus felis                | RefSeq   | 1415   | 0           | 131000547       | rRNA     | cat with pneumonia                        |                  | 1         | 1415     | TRUE    |            |         |
| NR_136770_1_1525 | 1379270 | NR_136770 | Gemmatimonas phototrophica strain AP64 16S ribosomal RNA, partial sequence                   | 2-Aug-16      | 4-Jan-18      | 1       |           | Gemmatimonas phototrophica           | RefSeq   | 1525   | 0           | AP64            | rRNA     | Swan Lake surface water sample 0.5 m deep |                  | 1         | 1525     | TRUE    |            |         |
| NR_136869_1_1491 | 1735111 | NR_136869 | Bergeyella porcorum strain 1350-03 16S ribosomal RNA, partial sequence                       | 30-Mar-17     | 4-Jan-18      | 1       |           | Bergeyella porcorum                  | RefSeq   | 1446   | 0           | 1350-03         | rRNA     | lung                                      |                  | 1         | 1446     | TRUE    |            |         |
| NR_137373_1_1336 | 1300275 | NR_137373 | Mesorhizobium cantuariense strain ICMP 19515 16S ribosomal RNA, partial sequence             | 24-Jun-16     | 4-Jan-18      | 1       |           | Mesorhizobium cantuariense           | RefSeq   | 1391   | 0           | ICMP 19515      | rRNA     |                                           |                  | 1         | 1391     | TRUE    |            |         |
| NR_144582_1_1408 | 1384589 | NR_144582 | Erwinia teleglylli strain SCU-8244 16S ribosomal RNA, partial sequence                       | 29-Nov-16     | 4-Jan-18      | 1       |           | Erwinia teleglylli                   | RefSeq   | 1408   | 0           | SCU-8244        | rRNA     |                                           |                  | 1         | 1408     | TRUE    |            |         |
| NR_144592_1_1371 | 1631356 | NR_144592 | Luteipluvertaria halotolerans strain C296001 16S ribosomal RNA, partial sequence             | 29-Nov-16     | 4-Jan-18      | 1       |           | Luteipluvertaria halotolerans        | RefSeq   | 1371   | 0           | C296001         | rRNA     | soil                                      |                  | 1         | 1371     | TRUE    |            |         |
| NR_146033_1_1499 | 1329367 | NR_146033 | Arenimonas taoyuanensis strain YN2-31A 16S ribosomal RNA, partial sequence                   | 28-Feb-17     | 4-Jan-18      | 1       |           | Arenimonas taoyuanensis              | RefSeq   | 1499   | 0           | YN2-31A         | rRNA     | rice field soil                           |                  | 1         | 1499     | TRUE    |            |         |
| NR_147380_1_1472 | 1871008 | NR_147380 | Eggerthella timonensis strain Marseille-P3135 16S ribosomal RNA, partial sequence            | 17-May-17     | 4-Jan-18      | 1       |           | Eggerthella timonensis               | RefSeq   | 1472   | 0           | Marseille-P3135 | rRNA     | stool                                     |                  | 1         | 1472     | TRUE</  |            |         |

| seqname                       | tax_id  | accession       | description                                                                                                      | modified_date | download_date | version_num | source                                             | keywords                               | organism                                           | length | ambig_count | strain            | mol_type    | isolate | isolation_source                                                            | seq_start | seq_stop | is_type | collection | species |  |
|-------------------------------|---------|-----------------|------------------------------------------------------------------------------------------------------------------|---------------|---------------|-------------|----------------------------------------------------|----------------------------------------|----------------------------------------------------|--------|-------------|-------------------|-------------|---------|-----------------------------------------------------------------------------|-----------|----------|---------|------------|---------|--|
| NZ_ABGG01000152_10994_12499   | 214688  | NZ_ABGG01000152 | Gemmata obscuriglobus UQM 2246 contig_1106221708915, whole genome shotgun sequence                               | 18-May-17     | 4-Jan-18      | 1           | Gemmata obscuriglobus UQM 2246                     | WGS,RefSeq                             | Gemmata obscuriglobus UQM 2246                     | 1506   | 0           | UQM 2246          | genomic DNA |         |                                                                             | 10994     | 12499    | TRUE    |            |         |  |
| NZ_ABGG01000527_169_1674      | 214688  | NZ_ABGG01000527 | Gemmata obscuriglobus UQM 2246 contig_1106221703417, whole genome shotgun sequence                               | 18-May-17     | 4-Jan-18      | 1           | Gemmata obscuriglobus UQM 2246                     | WGS,RefSeq                             | Gemmata obscuriglobus UQM 2246                     | 1506   | 0           | UQM 2246          | genomic DNA |         |                                                                             |           | 169      | 1674    | TRUE       |         |  |
| NZ_AHAM01000052_6575_8063     | 1107882 | NZ_AHAM01000052 | Mesorhizobium alhagi CNWX12-2 contig54, whole genome shotgun sequence                                            | 19-May-17     | 4-Jan-18      | 1           | Mesorhizobium alhagi CNWX12-2                      | WGS,RefSeq                             | Mesorhizobium alhagi CNWX12-2                      | 1489   | 0           | CNWX12-2          | genomic DNA |         | symbiotic root nodules on Alhagi sparsifolia from desert of northwest China | 6575      | 8063     | TRUE    |            |         |  |
| NZ_AISX01000044_137_1678      | 1095749 | NZ_AISX01000044 | Pasteurella bettyae CCGU 2042 contig00036, whole genome shotgun sequence                                         | 7-Apr-17      | 4-Jan-18      | 1           | Pasteurella bettyae CCGU 2042                      | WGS,HIGH_QUALITY_DRAFT,RefSeq          | Pasteurella bettyae CCGU 2042                      | 1542   | 0           | CCGU 2042         | genomic DNA |         | biological product [ENVO:02000043]                                          | 137       | 1678     | TRUE    |            |         |  |
| NZ_ANAS01000053_267_1807      | 1236902 | NZ_ANAS01000053 | Nocardia baichengensis YIM 90130 Scaffold030_2, whole genome shotgun sequence                                    | 19-May-17     | 4-Jan-18      | 1           | Nocardia baichengensis YIM 90130                   | WGS,RefSeq                             | Nocardia baichengensis YIM 90130                   | 1541   | 0           | YIM 90130         | genomic DNA |         | hypersaline soil                                                            | 267       | 1807     | TRUE    |            |         |  |
| NZ_ANAY01000063_423_1964      | 1246445 | NZ_ANAY01000063 | Nocardia kunsanensis DSM 44524 contig_63, whole genome shotgun sequence                                          | 19-May-17     | 4-Jan-18      | 1           | Nocardia kunsanensis DSM 44524                     | WGS,RefSeq                             | Nocardia kunsanensis DSM 44524                     | 1542   | 0           | DSM 44524         | genomic DNA |         | saltern                                                                     | 423       | 1964     | TRUE    |            |         |  |
| NZ_AP01155_1824975_1826470    | 120107  | NZ_AP01155      | Sphingobium cloacae DSM 14966 contig_10874, whole genome shotgun sequence                                        | 27-Sep-17     | 4-Jan-18      | 1           | Sphingobium cloacae                                | RefSeq                                 | Sphingobium cloacae                                | 1496   | 0           | JCM 10874         | genomic DNA |         |                                                                             | 1824975   | 1826470  | TRUE    |            |         |  |
| NZ_APJW01000003_244775_246313 | 1046581 | NZ_APJW01000003 | Chlamydia ibidis 10-1398/6 ibis contig.2, whole genome shotgun sequence                                          | 8-Apr-17      | 4-Jan-18      | 1           | Chlamydia ibidis 10-1398/6                         | WGS,RefSeq                             | Chlamydia ibidis 10-1398/6                         | 1559   | 0           | 10-1398/6         | genomic DNA |         | biological product [ENVO:02000043]                                          | 244775    | 246313   | TRUE    |            |         |  |
| NZ_AQXR01000000_109922_111467 | 1122228 | NZ_AQXR01000000 | Alloscardovia criceti DSM 17774 D570DRAFT_scaffold00006_6_C, whole genome shotgun sequence                       | 17-Apr-17     | 4-Jan-18      | 1           | Alloscardovia criceti DSM 17774                    | WGS,RefSeq                             | Alloscardovia criceti DSM 17774                    | 1546   | 0           | DSM 17774         | genomic DNA |         |                                                                             | 109922    | 111467   | TRUE    |            |         |  |
| NZ_ATDP01000095_26815_28311   | 1331060 | NZ_ATDP01000095 | Sphingobium lactosutens DS20 contig095, whole genome shotgun sequence                                            | 17-Apr-17     | 4-Jan-18      | 1           | Sphingobium lactosutens DS20                       | WGS,RefSeq                             | Sphingobium lactosutens DS20                       | 1497   | 0           | DS20              | genomic DNA |         | hexachlorocyclohexane(HCH) pesticide-contaminated soil                      | 26815     | 28311    | TRUE    |            |         |  |
| NZ_ATNM01000154_5_1533        | 641524  | NZ_ATNM01000154 | Cyclobacterium qasimii M12-11B contig00110, whole genome shotgun sequence                                        | 8-Apr-17      | 4-Jan-18      | 1           | Cyclobacterium qasimii M12-11B                     | WGS,RefSeq                             | Cyclobacterium qasimii M12-11B                     | 1529   | 0           | M12-11B           | genomic DNA |         |                                                                             | 5         | 1533     | TRUE    |            |         |  |
| NZ_ATUR01000002_766667_768165 | 1123270 | NZ_ATUR01000002 | Sphingopyxis baekryungensis DSM 16222 G410DRAFT_scaffold00001_1_C, whole genome shotgun sequence                 | 17-Apr-17     | 4-Jan-18      | 1           | Sphingopyxis baekryungensis DSM 16222              | WGS,RefSeq                             | Sphingopyxis baekryungensis DSM 16222              | 1499   | 0           | DSM 16222         | genomic DNA |         |                                                                             | 766667    | 768165   | TRUE    |            |         |  |
| NZ_ATVD01000003_563065_564609 | 1121015 | NZ_ATVD01000003 | Arenimonas oryzae DSM 21050 = YC6267 strain DSM 21050 G407DRAFT_scaffold00003_3_C, whole genome shotgun sequence | 8-Apr-17      | 4-Jan-18      | 1           | Arenimonas oryzae DSM 21050 = YC6267               | WGS,RefSeq                             | Arenimonas oryzae DSM 21050 = YC6267               | 1545   | 0           | DSM 21050         | genomic DNA |         |                                                                             | 563065    | 564609   | TRUE    |            |         |  |
| NZ_ATXP01000015_265_1795      | 1122602 | NZ_ATXP01000015 | H578DRAFT_scaffold00015_15_C, whole genome shotgun sequence                                                      | 17-Apr-17     | 4-Jan-18      | 1           | Nesterenkonia alba DSM 19423                       | WGS,RefSeq                             | Nesterenkonia alba DSM 19423                       | 1531   | 0           | DSM 19423         | genomic DNA |         |                                                                             | 265       | 1795     | TRUE    |            |         |  |
| NZ_AUAB01000061_70_1614       | 1121939 | NZ_AUAB01000061 | Halomonas anticariensis FP35 = DSM 16096 F567DRAFT_scaffold00056_56_C, whole genome shotgun sequence             | 9-Apr-17      | 4-Jan-18      | 1           | Halomonas anticariensis FP35 = DSM 16096           | WGS,IMPROVED_HIGH_QUALITY_DRAFT,RefSeq | Halomonas anticariensis FP35 = DSM 16096           | 1545   | 0           | DSM 16096         | genomic DNA |         |                                                                             | 70        | 1614     | TRUE    |            |         |  |
| NZ_AUHK01000044_24_1352       | 1121947 | NZ_AUHK01000044 | Helicococcus suecicus DSM 17243 G534DRAFT_scaffold00042_42_C, whole genome shotgun sequence                      | 17-Apr-17     | 4-Jan-18      | 1           | Helicococcus suecicus DSM 17243                    | WGS,IMPROVED_HIGH_QUALITY_DRAFT,RefSeq | Helicococcus suecicus DSM 17243                    | 1329   | 0           | DSM 17243         | genomic DNA |         |                                                                             | 24        | 1352     | TRUE    |            |         |  |
| NZ_AULN01000112_143074_144621 | 1122183 | NZ_AULN01000112 | Luteimonas mephitis DSM 12574 H570DRAFT_scaffold00002_2_C, whole genome shotgun sequence                         | 17-Apr-17     | 4-Jan-18      | 1           | Luteimonas mephitis DSM 12574                      | WGS,RefSeq                             | Luteimonas mephitis DSM 12574                      | 1548   | 0           | DSM 12574         | genomic DNA |         |                                                                             | 143074    | 144621   | TRUE    |            |         |  |
| NZ_AVCX01000041_1_1440        | 1384056 | NZ_AVCX01000041 | Arenimonas metalli CFS-1 contig54, whole genome shotgun sequence                                                 | 17-Apr-17     | 4-Jan-18      | 1           | Arenimonas metalli CFS-1                           | WGS,RefSeq                             | Arenimonas metalli CFS-1                           | 1440   | 0           | CFS-1             | genomic DNA |         | iron mine                                                                   | 1         | 1440     | TRUE    |            |         |  |
| NZ_AWXU01000060_3458_4998     | 1121013 | NZ_AWXU01000060 | Arenimonas compositi TR7-09 = DSM 18010 strain TR7-09 contig63_scaffold025, whole genome shotgun sequence        | 9-Apr-17      | 4-Jan-18      | 1           | Arenimonas compositi TR7-09 = DSM 18010            | WGS,RefSeq                             | Arenimonas compositi TR7-09 = DSM 18010            | 1541   | 0           | TR7-09            | genomic DNA |         | samples of compost                                                          | 3458      | 4998     | TRUE    |            |         |  |
| NZ_AYTB01000001_171_1734      | 1334046 | NZ_AYTB01000001 | Kurthia huakuii LAM0618 Scaffold1_1, whole genome shotgun sequence                                               | 9-Apr-17      | 4-Jan-18      | 1           | Kurthia huakuii LAM0618                            | WGS,RefSeq                             | Kurthia huakuii LAM0618                            | 1564   | 0           | LAM0618           | genomic DNA |         | biogas slurry samples from a large-scale anaerobic digester                 | 171       | 1734     | TRUE    |            |         |  |
| NZ_BACL01000011_17575_19102   | 1313171 | NZ_BACL01000011 | Ilumatobacter nonamiensis YM16-303, whole genome shotgun sequence                                                | 18-May-17     | 4-Jan-18      | 1           | Ilumatobacter nonamiensis YM16-303                 | WGS,RefSeq,STANDARD_DRAFT              | Ilumatobacter nonamiensis YM16-303                 | 1528   | 0           | YM16-303          | genomic DNA |         |                                                                             | 17575     | 19102    | TRUE    |            |         |  |
| NZ_BAZI01000187_283_1826      | 1236960 | NZ_BAZI01000187 | Stenotrophomonas pictorum JCM 9942, whole genome shotgun sequence                                                | 19-Jul-17     | 4-Jan-18      | 1           | Stenotrophomonas pictorum JCM 9942                 | WGS,RefSeq,STANDARD_DRAFT              | Stenotrophomonas pictorum JCM 9942                 | 1544   | 0           | JCM 9942          | genomic DNA |         |                                                                             | 283       | 1826     | TRUE    |            |         |  |
| NZ_BCCQ01000190_55_1609       | 1223493 | NZ_BCCQ01000190 | Globicatella sanguinis NBRC 15551, whole genome shotgun sequence                                                 | 16-Apr-17     | 4-Jan-18      | 1           | Globicatella sanguinis NBRC 15551                  | WGS,STANDARD_DRAFT,RefSeq              | Globicatella sanguinis NBRC 15551                  | 1555   | 0           | NBRC 15551        | genomic DNA |         |                                                                             | 55        | 1609     | TRUE    |            |         |  |
| NZ_BCCR01000172_33_1573       | 1223496 | NZ_BCCR01000172 | Nocardia dassonvillei subsp. albirubida NBRC 13392, whole genome shotgun sequence                                | 12-Apr-17     | 4-Jan-18      | 1           | Nocardia dassonvillei subsp. albirubida NBRC 13392 | WGS,STANDARD_DRAFT,RefSeq              | Nocardia dassonvillei subsp. albirubida NBRC 13392 | 1541   | 0           | NBRC 13392        | genomic DNA |         |                                                                             | 33        | 1573     | TRUE    |            |         |  |
| NZ_BCTF01000049_3846_5382     | 1349572 | NZ_BCTF01000049 | Hydrogenophaga flava NBRC 102514, whole genome shotgun sequence                                                  | 17-Apr-17     | 4-Jan-18      | 1           | Hydrogenophaga flava NBRC 102514                   | WGS,STANDARD_DRAFT,RefSeq              | Hydrogenophaga flava NBRC 102514                   | 1537   | 0           | NBRC 102514       | genomic DNA |         |                                                                             | 3846      | 5382     | TRUE    |            |         |  |
| NZ_BCTI01000074_10075_11611   | 1349790 | NZ_BCTI01000074 | Hydrogenophaga intermedia NBRC 102510, whole genome shotgun sequence                                             | 12-Apr-17     | 4-Jan-18      | 1           | Hydrogenophaga intermedia NBRC 102510              | WGS,RefSeq,STANDARD_DRAFT              | Hydrogenophaga intermedia NBRC 102510              | 1537   | 0           | NBRC 102510       | genomic DNA |         |                                                                             | 10075     | 11611    | TRUE    |            |         |  |
| NZ_BCTJ01000079_363_1899      | 1349791 | NZ_BCTJ01000079 | Hydrogenophaga palleroni NBRC 102513, whole genome shotgun sequence                                              | 17-Apr-17     | 4-Jan-18      | 1           | Hydrogenophaga palleroni NBRC 102513               | WGS,STANDARD_DRAFT,RefSeq              | Hydrogenophaga palleroni NBRC 102513               | 1537   | 0           | NBRC 102513       | genomic DNA |         |                                                                             | 363       | 1899     | TRUE    |            |         |  |
| NZ_BCLV01000003_13071_134602  | 1216972 | NZ_BCLV01000003 | Janibacter terrae NBRC 107853, whole genome shotgun sequence                                                     | 12-Apr-17     | 4-Jan-18      | 1           | Janibacter terrae NBRC 107853                      | WGS,RefSeq,HIGH_QUALITY_DRAFT          | Janibacter terrae NBRC 107853                      | 1532   | 0           | NBRC 107853       | genomic DNA |         |                                                                             | 313071    | 314602   | TRUE    |            |         |  |
| NZ_BCVN01000061_3262_4823     | 1348633 | NZ_BCVN01000061 | Lactococcus raffinolactis NBRC 100932, whole genome shotgun sequence                                             | 12-Apr-17     | 4-Jan-18      | 1           | Lactococcus raffinolactis NBRC 100932              | WGS,STANDARD_DRAFT,RefSeq              | Lactococcus raffinolactis NBRC 100932              | 1562   | 0           | NBRC 100932       | genomic DNA |         |                                                                             | 3262      | 4823     | TRUE    |            |         |  |
| NZ_BCSY01000084_1_1541        | 1218113 | NZ_BCSY01000084 | Kluyvera intermedia NBRC 102594 = ATCC 33110 strain NBRC 102594, whole genome shotgun sequence                   | 20-Dec-16     | 4-Jan-18      | 1           | Kluyvera intermedia NBRC 102594 = ATCC 33110       | WGS,STANDARD_DRAFT,RefSeq              | Kluyvera intermedia NBRC 102594 = ATCC 33110       | 1541   | 0           | NBRC 102594       | genomic DNA |         |                                                                             | 1         | 1541     | TRUE    |            |         |  |
| NZ_BZCQ01000015_73162_74659   | 1219058 | NZ_BZCQ01000015 | Sphingopyxis terrae NBRC 15098, whole genome shotgun sequence                                                    | 12-Apr-17     | 4-Jan-18      | 1           | Sphingopyxis terrae NBRC 15098                     | WGS,RefSeq,HIGH_QUALITY_DRAFT          | Sphingopyxis terrae NBRC 15098                     | 1498   | 0           | NBRC 15098        | genomic DNA |         |                                                                             | 73162     | 74659    | TRUE    |            |         |  |
| NZ_CAEW01000048_1_1373        | 1033740 | NZ_CAEW01000048 | Kurthia senegalensis strain type strain: JCBE, whole genome shotgun sequence                                     | 24-Apr-17     | 4-Jan-18      | 1           | Kurthia senegalensis                               | WGS,RefSeq                             | Kurthia senegalensis                               | 1373   | 0           | type strain: JCBE | genomic DNA |         | host stool sample                                                           | 1         | 1373     | TRUE    |            |         |  |
| NZ_CP007597_464372_4645268    | 216778  | NZ_CP007597     | Stenotrophomonas rhizophila strain DSM14405 genome                                                               | 9-Apr-17      | 4-Jan-18      | 1           | Stenotrophomonas rhizophila                        | RefSeq                                 | Stenotrophomonas rhizophila                        | 1547   | 0           | DSM 14405         | genomic DNA |         | root                                                                        | 464372    | 4645268  | TRUE    |            |         |  |
| NZ_CP008918_1843300_1844850   | 747     | NZ_CP008918     | Pasteurella multocida strain ATCC 43137, complete genome                                                         | 2-Apr-17      | 4-Jan-18      | 1           | Pasteurella multocida                              | RefSeq                                 | Pasteurella multocida                              | 1551   | 0           | ATCC 43137        | genomic DNA |         |                                                                             | 1843300   | 1844850  | TRUE    |            |         |  |
| NZ_CP009553_304591_306128     | 93220   | NZ_CP009553     | Pandoraea pronomus strain DSM 16536, complete genome                                                             | 5-Apr-17      | 4-Jan-18      | 3           | Pandoraea pronomus                                 | RefSeq                                 | Pandoraea pronomus                                 | 1538   | 0           | DSM 16536         | genomic DNA |         | cystic fibrosis patient                                                     | 304591    | 306128   | TRUE    |            |         |  |
| NZ_CP011310_2718372_2719866   | 1648404 | NZ_CP011310     | Erythrobacter atlanticus strain s21-N3, complete genome                                                          | 12-Apr-17     | 4-Jan-18      | 1           | Erythrobacter atlanticus                           | RefSeq                                 | Erythrobacter atlanticus                           | 1495   | 0           | s21-N3            | genomic DNA |         | deep sea sediment of the Atlantic Ocean                                     | 2718372   | 2719866  | TRUE    |            |         |  |
| NZ_CP011452_3089466_3090961   | 162766  | NZ_CP011452     | Altererythrobacter atlanticus strain 260Y36, complete genome                                                     | 11-Apr-17     | 4-Jan-18      | 2           | Altererythrobacter atlanticus                      | GSC:Mix5;MIGS.3.0;RefSeq               | Altererythrobacter atlanticus                      | 1496   | 0           | 260Y36            | genomic DNA |         | North Atlantic Rise deep-sea sediment                                       | 3089466   | 3090961  | TRUE    |            |         |  |
| NZ_CP01454_2072843_2074374    | 1379270 | NZ_CP01454      | Gemmatimonas phototrophica strain AP64, complete genome                                                          | 12-Apr-17     | 4-Jan-18      | 1           | Gemmatimonas phototrophica                         | RefSeq                                 | Gemmatimonas phototrophica                         | 1532   | 0           | AP64              | genomic DNA |         | surface water of Swan Lake                                                  | 2072843   | 2074374  | TRUE    |            |         |  |
| NZ_CP012040_3360545_3362073   | 320787  | NZ_CP012040     | Cyclobacterium amurskyense strain KCTC 12363, complete genome                                                    | 17-Apr-17     | 4-Jan-18      | 1           | Cyclobacterium amurskyense                         | GSC:Mix5.2;RefSeq                      | Cyclobacterium amurskyense                         | 1529   | 0           | KCTC 12363        | genomic DNA |         | seawater                                                                    | 3360545   | 3362073  | TRUE    |            |         |  |
| NZ_CP013002_140151_141641     | 69395   | NZ_CP013002     | Caulobacter henrici strain CB4, complete genome                                                                  | 17-Apr-17     | 4-Jan-18      | 1           | Caulobacter henrici                                | RefSeq                                 | Caulobacter henrici                                | 1491   | 0           | CB4               | genomic DNA |         | pond water                                                                  | 140151    | 141641   | TRUE    |            |         |  |
| NZ_CP013481_4467267_4468804   | 93218   | NZ_CP013481     | Pandoraea apista strain DSM 16535, complete genome                                                               | 16-Apr-17     | 4-Jan-18      | 2           | Pandoraea apista                                   | RefSeq                                 | Pandoraea apista                                   | 1538   | 0           | DSM 16535         | genomic DNA |         | Sputum (Cystic Fibrosis Patient)                                            | 4467267   | 4468804  | TRUE    |            |         |  |
| NZ_CP014227_838676_840220     | 45243   | NZ_CP014227     | Capnocytophaga haemolytica strain CCGU 32990, complete genome                                                    | 11-Apr-17     | 4-Jan-18      | 1           | Capnocytophaga haemolytica                         | RefSeq                                 | Capnocytophaga haemolytica                         | 1525   | 0           | CCGU 32990        | genomic DNA |         | curlette                                                                    | 838676    | 840220   | TRUE    |            |         |  |
| NZ_CP016591_2980504_2982000   | 692370  | NZ_CP016591     | Altererythrobacter dongtangenis strain KCTC 22672, complete genome                                               | 17-Apr-17     | 4-Jan-18      | 1           | Altererythrobacter dongtangenis                    | GSC:Mix5;MIGS.3.0;RefSeq               | Altererythrobacter dongtangenis                    | 1497   | 0           | KCTC 22672        | genomic DNA |         | tidal flat                                                                  | 2980504   | 2982000  | TRUE    |            |         |  |
| NZ_CP017057_2720082_2721574   | 39960   | NZ_CP017057     | Erythrobacter litoralis strain DSM 8509, complete genome                                                         | 13-Apr-17     | 4-Jan-18      | 1           | Erythrobacter litoralis                            | RefSeq                                 | Erythrobacter litoralis                            | 1493   | 0           | DSM 8509          | genomic DNA |         | cyanobacterial mat                                                          | 2720082   | 2721574  | TRUE    |            |         |  |
| NZ_CP017476_544667_546207     | 1763535 | NZ_CP017476     | Hydrogenophaga crassostreae strain LPB0072, complete genome                                                      | 13-Apr-17     | 4-Jan-18      | 1           | Hydrogenophaga crassostreae                        | RefSeq                                 | Hydrogenophaga crassostreae                        | 1541   | 0           | LPB0072           | genomic DNA |         | Crassostrea gigas                                                           | 544667    | 546207   | TRUE    |            |         |  |
| NZ_CP018097_1127407_1128901   | 502682  | NZ_CP018097     | Erythrobacter gangjinensis strain CGMCC1.15024 chromosome 1, complete sequence                                   | 16-Apr-17     | 4-Jan-18      | 1           | Erythrobacter gangjinensis                         | GSC:Mix5;MIGS.3.0;RefSeq               | Erythrobacter gangjinensis                         | 1495   | 0           | CGMCC1.15024      | genomic DNA |         |                                                                             |           |          |         |            |         |  |

| seqname                         | tax_id  | accession       | description                                                                                     | modified_date | download_date | version | num_source | keywords                           | organism                                           | length | ambig_count | strain          | mol_type    | isolate | isolation_source                              | seq_start | seq_end | is_type | collection | species |
|---------------------------------|---------|-----------------|-------------------------------------------------------------------------------------------------|---------------|---------------|---------|------------|------------------------------------|----------------------------------------------------|--------|-------------|-----------------|-------------|---------|-----------------------------------------------|-----------|---------|---------|------------|---------|
| NZ_FTMD01000035_159_1703        | 34027   | NZ_FTMD01000035 | Azoarcus tolyluticus strain ATCC 51758, whole genome shotgun sequence                           | 20-Jun-17     | 4-Jan-18      | 1       | 1          | Azoarcus tolyluticus               | WGS;RefSeq                                         | 1545   | 0           | ATCC 51758      | genomic DNA |         |                                               | 159       | 1703    | TRUE    |            |         |
| NZ_FUWR01000017_102_1663        | 115783  | NZ_FUWR01000017 | Geobacter thiogenes strain ATCC BAA-34, whole genome shotgun sequence                           | 11-Mar-17     | 4-Jan-18      | 1       | 1          | Geobacter thiogenes                | WGS;RefSeq                                         | 1562   | 0           | ATCC BAA-34     | genomic DNA |         |                                               | 102       | 1663    | TRUE    |            |         |
| NZ_FXWG01000001_804062_805557   | 1316679 | NZ_FXWG01000001 | Altererythrobracter xiamenensis strain CGMCC 1.12494, whole genome shotgun sequence             | 24-May-17     | 4-Jan-18      | 1       | 1          | Altererythrobracter xiamenensis    | WGS;RefSeq                                         | 1496   | 0           | CGMCC 1.12494   | genomic DNA |         |                                               | 804062    | 805557  | TRUE    |            |         |
| NZ_FXXA01000002_3084972_3086489 | 1871008 | NZ_FXXA01000002 | Eggerthella timonensis strain Marseille-P3135, whole genome shotgun sequence                    | 11-Jan-18     | 12-Jan-18     | 1       | 1          | Eggerthella timonensis             | WGS;RefSeq                                         | 1518   | 0           | Marseille-P3135 | genomic DNA |         |                                               | 3084972   | 3086489 | TRUE    |            |         |
| NZ_FZOT01000044_18_1555         | 1688639 | NZ_FZOT01000044 | Noviherbaspirillum humi strain U15, whole genome shotgun sequence                               | 11-Jun-17     | 4-Jan-18      | 1       | 1          | Noviherbaspirillum humi            | WGS;RefSeq                                         | 1538   | 0           | U15             | genomic DNA |         |                                               | 18        | 1555    | TRUE    |            |         |
| NZ_FPZA01000012_26424_27921     | 436663  | NZ_FPZA01000012 | Sphingopyxis indica strain DS15, whole genome shotgun sequence                                  | 21-Jul-17     | 4-Jan-18      | 1       | 1          | Sphingopyxis indica                | WGS;RefSeq                                         | 1498   | 0           | DS15            | genomic DNA |         |                                               | 26424     | 27921   | TRUE    |            |         |
| NZ_GG665873_173602_175152       | 629741  | NZ_GG665873     | Kingella oralis ATCC 51147 Sclfd2, whole genome shotgun sequence                                | 7-Apr-17      | 4-Jan-18      | 1       | 1          | Kingella oralis ATCC 51147         | WGS;RefSeq                                         | 1551   | 0           | ATCC 51147      | genomic DNA |         | biological product [ENVO:02000043]            | 173602    | 175152  | TRUE    |            |         |
| NZ_GG694026_4268_5804           | 638300  | NZ_GG694026     | Cardiobacterium hominis ATCC 15826 SCAFFOLD2, whole genome shotgun sequence                     | 7-Apr-17      | 4-Jan-18      | 1       | 1          | Cardiobacterium hominis ATCC 15826 | WGS;RefSeq                                         | 1537   | 0           | ATCC 15826      | genomic DNA |         | biological product [ENVO:02000043]            | 4268      | 5804    | TRUE    |            |         |
| NZ_GG697141_1013064_1014631     | 500635  | NZ_GG697141     | Mitsuokella multacida DSM 20544 Sclfd0, whole genome shotgun sequence                           | 17-Apr-17     | 4-Jan-18      | 2       | 2          | Mitsuokella multacida DSM 20544    | WGS;RefSeq                                         | 1568   | 0           | DSM 20544       | genomic DNA |         | biological product [ENVO:02000043]            | 1013064   | 1014631 | TRUE    |            |         |
| NZ_GG697141_400041_401608       | 500635  | NZ_GG697141     | Mitsuokella multacida DSM 20544 Sclfd0, whole genome shotgun sequence                           | 17-Apr-17     | 4-Jan-18      | 2       | 2          | Mitsuokella multacida DSM 20544    | WGS;RefSeq                                         | 1568   | 0           | DSM 20544       | genomic DNA |         | biological product [ENVO:02000043]            | 400041    | 401608  | TRUE    |            |         |
| NZ_GG700642_1293531_1295070     | 626522  | NZ_GG700642     | Alloprevotella tannerae ATCC 51259 Sclfd0, whole genome shotgun sequence                        | 17-Apr-17     | 4-Jan-18      | 1       | 1          | Alloprevotella tannerae ATCC 51259 | WGS;RefSeq                                         | 1548   | 0           | ATCC 51259      | genomic DNA |         | biological product [ENVO:02000043]            | 1293531   | 1295070 | TRUE    |            |         |
| NZ_GJ891966_3886_5432           | 887327  | NZ_GJ891966     | Kingella kingae ATCC 23330 SCAFFOLD8, whole genome shotgun sequence                             | 30-Mar-17     | 4-Jan-18      | 1       | 1          | Kingella kingae ATCC 23330         | WGS;STANDARD_DRAFT;RefSeq                          | 1537   | 0           | ATCC 23330      | genomic DNA |         | airways, nasal                                | 3886      | 5432    | TRUE    |            |         |
| NZ_HG005180_2_1534              | 1232429 | NZ_HG005180     | Nesterenkonia massiliensis strain NP1, whole genome shotgun sequence                            | 8-Apr-17      | 4-Jan-18      | 1       | 1          | Nesterenkonia massiliensis         | WGS;RefSeq                                         | 1533   | 0           | NP1             | genomic DNA |         |                                               | 2         | 1534    | TRUE    |            |         |
| NZ_JAANO1000045_108269_109816   | 1442599 | NZ_JAANO1000045 | Luteimonas huabeiensis HB2 HB2_contig_2, whole genome shotgun sequence                          | 9-Apr-17      | 4-Jan-18      | 1       | 1          | Luteimonas huabeiensis HB2         | WGS;RefSeq                                         | 1548   | 0           | HB2             | genomic DNA |         |                                               | 108269    | 109816  | TRUE    |            |         |
| NZ_JH414508_1_1532              | 796944  | NZ_JH414508     | Oribacterium asacharolyticum ACB7 supercont1.5, whole genome shotgun sequence                   | 7-Apr-17      | 4-Jan-18      | 1       | 1          | Oribacterium asacharolyticum ACB7  | WGS;HIGH_QUALITY_DRAFT;RefSeq                      | 1532   | 0           | ACB7            | genomic DNA |         | biological product [ENVO:02000043]            | 1         | 1532    | TRUE    |            |         |
| NZ_JH932293_251104_252635       | 883096  | NZ_JH932293     | Bergeyella zoohelcum ATCC 43767 supercont1.1, whole genome shotgun sequence                     | 8-Apr-17      | 4-Jan-18      | 1       | 1          | Bergeyella zoohelcum ATCC 43767    | WGS;HIGH_QUALITY_DRAFT;RefSeq                      | 1532   | 0           | ATCC 43767      | genomic DNA |         | biological product [ENVO:02000043]            | 251104    | 252635  | TRUE    |            |         |
| NZ_JH932294_13163_14694         | 883096  | NZ_JH932294     | Bergeyella zoohelcum ATCC 43767 supercont1.2, whole genome shotgun sequence                     | 8-Apr-17      | 4-Jan-18      | 1       | 1          | Bergeyella zoohelcum ATCC 43767    | WGS;HIGH_QUALITY_DRAFT;RefSeq                      | 1532   | 0           | ATCC 43767      | genomic DNA |         | biological product [ENVO:02000043]            | 13163     | 14694   | TRUE    |            |         |
| NZ_JXO01000009_120123_121621    | 663610  | NZ_JXO01000009  | Methylocapsa aurea strain KYG T D18SDRAFT_scaffolds00007_7_C, whole genome shotgun sequence     | 17-Apr-17     | 4-Jan-18      | 1       | 1          | Methylocapsa aurea                 | WGS;RefSeq                                         | 1499   | 0           | KYG T           | genomic DNA |         |                                               | 120123    | 121621  | TRUE    |            |         |
| NZ_JRMO01000001_750276_751777   | 425400  | NZ_JRMO01000001 | Helicobacter japonicus strain MIT 01-6451 contig_87, whole genome shotgun sequence              | 22-Aug-17     | 4-Jan-18      | 1       | 1          | Helicobacter japonicus             | WGS;RefSeq                                         | 1502   | 0           | MIT 01-6451     | genomic DNA |         | cecal sample                                  | 750276    | 751777  | TRUE    |            |         |
| NZ_JRPG01000018_90_1637         | 37372   | NZ_JRPG01000018 | Helicobacter bilis strain ATCC 51630 CONTIG_18, whole genome shotgun sequence                   | 2-Apr-17      | 4-Jan-18      | 1       | 1          | Helicobacter bilis                 | WGS;RefSeq                                         | 1683   | 0           | ATCC 51630      | genomic DNA |         | bullet                                        | 5307      | 6889    | TRUE    |            |         |
| NZ_JRXX01000007_90_1637         | 1562001 | NZ_JRXX01000007 | Erwinia inlecta strain B120 contig000058, whole genome shotgun sequence                         | 10-Apr-17     | 4-Jan-18      | 1       | 1          | Erwinia inlecta                    | WGS;RefSeq                                         | 1548   | 0           | B120            | genomic DNA |         | Rissian wheat aphid biotype 2                 | 90        | 1637    | TRUE    |            |         |
| NZ_JWJG01000029_2738586_2740122 | 709839  | NZ_JWJG01000029 | Noviherbaspirillum autotrophicum strain TSA66 contig01, whole genome shotgun sequence           | 12-Aug-17     | 4-Jan-18      | 1       | 1          | Noviherbaspirillum autotrophicum   | WGS;RefSeq                                         | 1537   | 0           | TSA66           | genomic DNA |         | Rice paddy soil                               | 2738586   | 2740122 | TRUE    |            |         |
| NZ_JXU01000042_148_1668         | 1291764 | NZ_JXU01000042  | Lactococcus fujiensis JCM 16395 Scaffold042, whole genome shotgun sequence                      | 7-Oct-17      | 4-Jan-18      | 1       | 1          | Lactococcus fujiensis JCM 16395    | WGS;RefSeq                                         | 1521   | 0           | JCM 16395       | genomic DNA |         |                                               | 148       | 1668    | TRUE    |            |         |
| NZ_JXU01000025_298_1851         | 1365    | NZ_JXU01000025  | Lactococcus plantarum strain DSM 20686 Scaffold025, whole genome shotgun sequence               | 7-Oct-17      | 4-Jan-18      | 1       | 1          | Lactococcus plantarum              | WGS;RefSeq                                         | 1554   | 0           | DSM 20686       | genomic DNA |         | frozen peas                                   | 298       | 1851    | TRUE    |            |         |
| NZ_KB890763_177_1701            | 1122967 | NZ_KB890763     | Pontibacter roseus DSM 17521 B051DRAFT_scaffold_10.11, whole genome shotgun sequence            | 17-Apr-17     | 4-Jan-18      | 1       | 1          | Pontibacter roseus DSM 17521       | WGS;GSCMIGS.2.1;IMPROVED_HIGH_QUALITY_DRAFT;RefSeq | 1525   | 0           | DSM 17521       | genomic DNA |         |                                               | 177       | 1701    | TRUE    |            |         |
| NZ_KB893324_118824_120358       | 1123248 | NZ_KB893324     | Segetibacter koreensis DSM 18137 B154DRAFT_scaffold_18.19, whole genome shotgun sequence        | 17-Apr-17     | 4-Jan-18      | 1       | 1          | Segetibacter koreensis DSM 18137   | WGS;GSCMIGS.2.1;IMPROVED_HIGH_QUALITY_DRAFT;RefSeq | 1535   | 0           | DSM 18137       | genomic DNA |         |                                               | 118824    | 120358  | TRUE    |            |         |
| NZ_KB893385_3851_5385           | 1123248 | NZ_KB893385     | Segetibacter koreensis DSM 18137 B154DRAFT_scaffold_8.9, whole genome shotgun sequence          | 17-Apr-17     | 4-Jan-18      | 1       | 1          | Segetibacter koreensis DSM 18137   | WGS;GSCMIGS.2.1;IMPROVED_HIGH_QUALITY_DRAFT;RefSeq | 1535   | 0           | DSM 18137       | genomic DNA |         |                                               | 3851      | 5385    | TRUE    |            |         |
| NZ_KE136470_2189_3742           | 420889  | NZ_KE136470     | Lactococcus garvieae ATCC 49156 acqMN-supercont1.4, whole genome shotgun sequence               | 1-Apr-17      | 4-Jan-18      | 1       | 1          | Lactococcus garvieae ATCC 49156    | WGS;RefSeq                                         | 1554   | 0           | ATCC 49156      | genomic DNA |         |                                               | 2189      | 3742    | TRUE    |            |         |
| NZ_KE148312_1054064_1055597     | 796943  | NZ_KE148312     | Oribacterium parvum ACB1 acqcs-supercont1.2, whole genome shotgun sequence                      | 8-Apr-17      | 4-Jan-18      | 1       | 1          | Oribacterium parvum ACB1           | WGS;NONCONTIGUOUS_FINISHED;RefSeq                  | 1534   | 0           | ACB1            | genomic DNA |         | biological product [ENVO:02000043]            | 1054064   | 1055597 | TRUE    |            |         |
| NZ_KE148312_1419200_1420731     | 796943  | NZ_KE148312     | Oribacterium parvum ACB1 acqcs-supercont1.1, whole genome shotgun sequence                      | 8-Apr-17      | 4-Jan-18      | 1       | 1          | Oribacterium parvum ACB1           | WGS;NONCONTIGUOUS_FINISHED;RefSeq                  | 1534   | 0           | ACB1            | genomic DNA |         | biological product [ENVO:02000043]            | 1419200   | 1420731 | TRUE    |            |         |
| NZ_KE386496_2962397_2963891     | 395964  | NZ_KE386496     | Methylocapsa acidiphila B2 MetaDRAFT_scaffold1_2, whole genome shotgun sequence                 | 17-Apr-17     | 4-Jan-18      | 1       | 1          | Methylocapsa acidiphila B2         | WGS;NONCONTIGUOUS_FINISHED;RefSeq                  | 1495   | 0           | B2              | genomic DNA |         |                                               | 2962397   | 2963891 | TRUE    |            |         |
| NZ_K669456_1185_2852            | 1357400 | NZ_K669456      | Helicobacter macacae MIT 99-5501 adDE-supercont1.3, whole genome shotgun sequence               | 17-Apr-17     | 4-Jan-18      | 1       | 1          | Helicobacter macacae MIT 99-5501   | WGS;HIGH_QUALITY_DRAFT;RefSeq                      | 1668   | 0           | MIT 99-5501     | genomic DNA |         | sediment 18.1-18.2m below seafloor            | 1185      | 2852    | TRUE    |            |         |
| NZ_KQ759763_3635974_3637521     | 1247514 | NZ_KQ759763     | Luteimonas abyssii strain XH031 Scaffold01, whole genome shotgun sequence                       | 11-Apr-17     | 4-Jan-18      | 1       | 1          | Luteimonas abyssii                 | WGS;RefSeq                                         | 1548   | 0           | XH031           | genomic DNA |         | soil sample collected from a secondary forest | 3635974   | 3637521 | TRUE    |            |         |
| NZ_LAIR01000002_1908830_1910358 | 1631356 | NZ_LAIR01000002 | Luteipulveratus halotolerans strain C296001 unlitg_O_quiver_44, whole genome shotgun sequence   | 10-Apr-17     | 4-Jan-18      | 1       | 1          | Luteipulveratus halotolerans       | WGS;RefSeq                                         | 1529   | 0           | C296001         | genomic DNA |         | soil sample collected from a secondary forest | 1908830   | 1910358 | TRUE    |            |         |
| NZ_LAIR01000002_2754786_2756314 | 1631356 | NZ_LAIR01000002 | Luteipulveratus halotolerans strain C296001 unlitg_O_quiver_44, whole genome shotgun sequence   | 10-Apr-17     | 4-Jan-18      | 1       | 1          | Luteipulveratus halotolerans       | WGS;RefSeq                                         | 1529   | 0           | C296001         | genomic DNA |         | soil sample collected from a secondary forest | 2754786   | 2756314 | TRUE    |            |         |
| NZ_LD1H01000020_3290_4834       | 266128  | NZ_LD1H01000020 | Stenotrophomonas koreensis strain DSM 17805 contig_20, whole genome shotgun sequence            | 16-Apr-17     | 4-Jan-18      | 1       | 1          | Stenotrophomonas koreensis         | WGS;RefSeq                                         | 1545   | 0           | DSM 17805       | genomic DNA |         | compost                                       | 3290      | 4834    | TRUE    |            |         |
| NZ_LD1H01000044_3843_5387       | 405444  | NZ_LD1H01000044 | Stenotrophomonas humi strain DSM 18929 contig_44, whole genome shotgun sequence                 | 16-Apr-17     | 4-Jan-18      | 1       | 1          | Stenotrophomonas humi              | WGS;RefSeq                                         | 1545   | 0           | DSM 18929       | genomic DNA |         | soil                                          | 3843      | 5387    | TRUE    |            |         |
| NZ_LF1L01000090_3784_5326       | 211589  | NZ_LF1L01000090 | Herbaspirillum chlorophenicum strain CPW301 contig09, whole genome shotgun sequence             | 10-Apr-17     | 4-Jan-18      | 1       | 1          | Herbaspirillum chlorophenicum      | WGS;RefSeq                                         | 1543   | 0           | CPW301          | genomic DNA |         | soil sediment                                 | 3784      | 5326    | TRUE    |            |         |
| NZ_LODL01000012_3557_5101       | 281362  | NZ_LODL01000012 | Dechloromonas denitrificans strain ATCC BAA-841 contig012, whole genome shotgun sequence        | 20-Jun-17     | 4-Jan-18      | 1       | 1          | Dechloromonas denitrificans        | WGS;RefSeq                                         | 1545   | 0           | ATCC BAA-841    | genomic DNA |         | earthworm gut                                 | 3557      | 5101    | TRUE    |            |         |
| NZ_LODL01000019_598362_599906   | 281362  | NZ_LODL01000019 | Dechloromonas denitrificans strain ATCC BAA-841 contig019, whole genome shotgun sequence        | 20-Jun-17     | 4-Jan-18      | 1       | 1          | Dechloromonas denitrificans        | WGS;RefSeq                                         | 1545   | 0           | ATCC BAA-841    | genomic DNA |         | earthworm gut                                 | 598362    | 599906  | TRUE    |            |         |
| NZ_LODL01000035_230246_231790   | 281362  | NZ_LODL01000035 | Dechloromonas denitrificans strain ATCC BAA-841 contig035, whole genome shotgun sequence        | 20-Jun-17     | 4-Jan-18      | 1       | 1          | Dechloromonas denitrificans        | WGS;RefSeq                                         | 1545   | 0           | ATCC BAA-841    | genomic DNA |         | earthworm gut                                 | 230246    | 231790  | TRUE    |            |         |
| NZ_LT608315_2585071_2588635     | 1852375 | NZ_LT608315     | Acidaminococcus massiliensis strain Marseille-P2828, whole genome shotgun sequence              | 13-Apr-17     | 4-Jan-18      | 1       | 1          | Acidaminococcus massiliensis       | WGS;RefSeq                                         | 1565   | 0           | Marseille-P2828 | genomic DNA |         |                                               | 2585071   | 2588635 | TRUE    |            |         |
| NZ_LT608315_610407_611974       | 1852375 | NZ_LT608315     | Acidaminococcus massiliensis strain Marseille-P2828, whole genome shotgun sequence              | 13-Apr-17     | 4-Jan-18      | 1       | 1          | Acidaminococcus massiliensis       | WGS;RefSeq                                         | 1568   | 0           | Marseille-P2828 | genomic DNA |         |                                               | 610407    | 611974  | TRUE    |            |         |
| NZ_LT670847_2291717_2293257     | 29571   | NZ_LT670847     | Halomonas subglaciescola strain ACAM 12 genome assembly, chromosome: I                          | 18-Mar-17     | 4-Jan-18      | 1       | 1          | Halomonas subglaciescola           | RefSeq                                             | 1541   | 0           | ACAM 12         | genomic DNA |         |                                               | 2291717   | 2293257 | TRUE    |            |         |
| NZ_LT732539_450_1973            | 1871033 | NZ_LT732539     | Olsenella urinifantis strain Marseille-P3197, whole genome shotgun sequence                     | 16-Oct-17     | 4-Jan-18      | 1       | 1          | Olsenella urinifantis              | WGS;RefSeq                                         | 1524   | 0           | Marseille-P3197 | genomic DNA |         |                                               | 450       | 1973    | TRUE    |            |         |
| NZ_LXEU01000015_1_1510          | 1354264 | NZ_LXEU01000015 | Kluyvera georgiana ATCC 51603 Sequence00115, whole genome shotgun sequence                      | 17-Apr-17     | 4-Jan-18      | 1       | 1          | Kluyvera georgiana ATCC 51603      | WGS;RefSeq                                         | 1510   | 0           | ATCC 51603      | genomic DNA |         |                                               | 1         | 1510    | TRUE    |            |         |
| NZ_MKER01000001_674_2218        | 69220   | NZ_MKER01000001 | Lelliottia nimpresuralis strain CIP 104980 CIP_104980-scaffold1, whole genome shotgun sequence  | 17-Apr-17     | 4-Jan-18      | 1       | 1          | Lelliottia nimpresuralis           | WGS;RefSeq                                         | 1545   | 0           | CIP 104980      | genomic DNA |         |                                               | 674       | 2218    | TRUE    |            |         |
| NZ_MKER01000003_164720_166275   | 69220   | NZ_MKER01000003 | Lelliottia nimpresuralis strain CIP 104980 CIP_104980-scaffold11, whole genome shotgun sequence | 17-Apr-17     | 4-Jan-18      | 1       | 1          | Lelliottia nimpresuralis           | WGS;RefSeq                                         | 1556   | 0           | CIP 104980      | genomic DNA |         |                                               | 164720    | 166275  | TRUE    |            |         |
| NZ_MKER01000009_203452_205005</ |         |                 |                                                                                                 |               |               |         |            |                                    |                                                    |        |             |                 |             |         |                                               |           |         |         |            |         |
