# Supplementary material
Source: PubMed Central journal article supplement (PMC8492123)
Supplement: ciaa1123_suppl_supplementary_material.pdf [file ciaa1123_suppl_supplementary_material.pdf]

## LIST OF SUPPLEMENTARY MATERIALS

### Supplementary Methods

**Supplementary Figure 1:** *A*, Urethral bacterial communities in men who have sex with men (MSM). Relative abundances of abundant bacteria are shown either at the species or genus level for visualization. All other taxa have been placed in the “Other” category. For all statistical analyses, sequences were placed at the most specific level (see Supplementary Table 3). *B*, Known pathogen detection by nucleic acid amplification testing (NAAT) or quantitative PCR (qPCR) including *Chlamydia trachomatis*, *Mycoplasma genitalium*, *Trichomonas vaginalis*, adenovirus or herpes simplex virus. *C*, Target validation of bacteria selected in this study for quantitative assessments: *Haemophilus influenzae*, *Mycoplasma penetrans* and *Ureaplasma urealyticum*. *D*, Alpha diversity as measured by the Shannon Diversity Index.

**Supplementary Figure 2:** *A*, Urethral bacterial communities in men who have sex with women (MSW). Layout for sections *A*, *B*, *C* and *D* are identical to Supplementary Figure 1.

**Supplementary Table 1:** Confirmatory statistical analyses for selection of quantitative PCR targets

**Supplementary Table 2:** Metadata for 434 individual study participants

**Supplementary Table 3:** Taxonomic output of sequence reads and relative abundances for 328 individual study participants with sequence data

**Supplementary Table 4:** Characteristics of 431 study participants with and without *Mycoplasma penetrans* stratified by sex of sex partners

**Supplementary Table 5:** Characteristics of 431 study participants with and without *Haemophilus influenzae* stratified by sex of sex partners

**Supplementary Table 6:** Characteristics of 431 study participants with and without *Ureaplasma urealyticum* stratified by sex of sex partners

**Dataset 1:** List of bacterial taxa used in the reference set.

## SUPPLEMENTARY METHODS

### Preparation of Mock Communities as Positive Controls

Two mock communities were prepared to evaluate if bacterial taxa present in the mock communities were detected with our laboratory processes and bioinformatics pipeline. The first mock community was created using plasmids containing the 16S rRNA gene of genital tract bacteria, such that bacterial taxa that are yet to be cultivated such as Bacterial Vaginosis-Associated Bacterium-1 (BVAB1) and vaginal TM7 can be detected using our pipeline (see table below). The second mock community was prepared using bacterial isolates typically present in the human genital tract. All taxa that were included in both mock communities were detected with our pipeline. We also detected one additional taxon with each mock community at low relative abundance; *Shigella/Escherichia* in mock community 1 (0.08%) and *Streptococcus mitis* group in mock community 2 (0.42%) (See Table below on Taxonomic Output for Positive Controls). As both taxa were dominant members of the bacterial community in our dataset, this likely represents cross-contamination between wells.

| Mock Community 1 (plasmid)      | Mock Community 2 (bacterial isolates) |
|---------------------------------|---------------------------------------|
| <i>Aerococcus christensenii</i> | <i>Aerococcus christensenii</i>       |
| <i>Atopobium vaginae</i>        | <i>Atopobium vaginae</i>              |
| BVAB1                           | <i>Gardnerella vaginalis</i>          |
| BVAB2                           | <i>Lactobacillus crispatus</i>        |
| Candidate Division TM7 vaginal  | <i>Lactobacillus gasseri</i>          |
| <i>Dialister micraerophilus</i> | <i>Lactobacillus iners</i>            |
| <i>Dialister</i> sp. type 2     | <i>Mageeibacillus indolicus</i>       |
| <i>Eggerthella</i> sp. type 1   | <i>Parvimonas</i>                     |
| <i>Gardnerella vaginalis</i>    | <i>Prevotella amnii</i>               |
| <i>Lactobacillus crispatus</i>  | <i>Prevotella bivia</i>               |
| <i>Lactobacillus iners</i>      | <i>Prevotella timonensis</i>          |
| <i>Lactobacillus jensenii</i>   |                                       |
| <i>Mageeibacillus indolicus</i> |                                       |
| <i>Megasphaera</i> sp. type 1   |                                       |
| <i>Sneathia amnii</i>           |                                       |

## Broad-range PCR, Sequencing and Processing of Sequence Reads

Broad-range PCR amplification of the V3-V4 hypervariable region of the 16S rRNA gene was performed on samples and negative controls using the primers below. Forward primers were used in a 3-1-1 ratio.

**338Fa-nextera** TCGTCGGCAGCGTCAGATGTGTATAAGAGACAG**AYTCCTRCGGGARGCAGCAG**

**338Fb-nextera**

TCGTCGGCAGCGTCAGATGTGTATAAGAGACAG**ACTCCTACGGGAGGCTGC**

**338Fc-nextera**

TCGTCGGCAGCGTCAGATGTGTATAAGAGACAG**ACACCTACGGGTGGCAGC**

The reverse primer was 806R-nextera

GTCTCGTGGGCTCGGAGATGTGTATAAGAGACAG**GGACTACHVGGGTATCTAAT**

The underlined sequences are the overhang sequences for compatibility with the Nextera®XT Index kit v2 (Illumina San Diego, CA), and the primer sequences targeting the 16S rRNA gene are denoted in bold letters.

Each 50 µL amplicon PCR master mix contained 1X Accuprime Buffer II, additional 2 mM magnesium chloride, 0.4 µM of forward primer formulation, 0.4 µM of reverse primer, and 0.03 U/µL Accuprime™ High Fidelity Taq polymerase (Thermo Fisher Scientific, Waltham, MA). DNA quantities ranging from  $2.2 \times 10^3$  -  $2.4 \times 10^6$  bacterial 16S rRNA gene copies from each urine sample were added to the PCR reaction. All buffers and water used for the clean-up and dilution steps were filtered using a 100,000 MW cut-off filter. Cycling conditions included a denaturation step at 94°C for 15 s, followed by 28 cycles of 94°C for 30 s, 55°C for 30 s, and 68°C for 1 min. Final extension was at 68°C for 7 min. Band size (604 bp) was confirmed with gel electrophoresis, but all control samples were processed through the pipeline regardless of band (blind). Amplicons were purified using the Agencourt AMPure XP beads (Beckman Coulter, Indianapolis, IN) per the 16S Metagenomic Sequencing Library Preparation protocol [1]. Purified amplicons were subjected to Index PCR using NexteraXT index kits v2 set A, set B, set C, and set D to multiplex up to 384 samples per sequencing run. After Index PCR, the amplicons were purified using

Agencourt AMPure XP beads, air dried and eluted in 40  $\mu$ L 1  $\times$  TE buffer. DNA concentrations in each sample was measured using the Quant-iT dsDNA assay kit-high sensitivity (Thermo Fisher Scientific, Waltham, MA) and equimolar quantities of samples were pooled. For samples with low DNA quantities, up to 30  $\mu$ L of DNA were added to sub-pools when equimolar quantities could not be achieved. The amplicons were subjected to sequencing on the Illumina MiSeq instrument (Illumina, San Diego, CA) with the MiSeq® Reagent Kit v3- 600 cycle to capture paired-end reads (2  $\times$  300). PhiX Control Library v3 (Illumina) was combined with the amplicon library at 15% to compensate for low base diversity.

Raw sequence reads were demultiplexed using Illumina MiSeq's onboard software. Demultiplexed reads were processed using *barcodecop* v0.4.1 [2] to enforce barcode quality using default settings as well as ensuring exact barcode matches to forward and reverse reads. The DADA2 package [3] was used for error correction, dereplication, paired-end assembly, and chimera removal and a list of unique sequence variants (SVs) were generated. Sequence reads are available from the NCBI Short Read Archive (Bioproject Accession: PRJNA637612).

### **Reference Set Creation and Taxonomic Assignment**

The SVs were used to recruit full-length 16S rRNA gene sequences from records downloaded from NCBI April 5, 2018 using the *ya16sdb* pipeline [4] based on similarity to experimentally generated reads (code available by request). A phylogenetic tree was constructed using RAxML with the niche-specific full-length sequences recruited from NCBI and locally generated 16S rRNA gene sequences from bacterial isolates and clones from the genital tract. Additional species were added to broaden the taxonomy when leaves contained only 1 representative sequence. The list of bacterial taxa used for the creation of the urethral reference set used for our analyses provided as Supplementary Dataset 1. A multiple sequence alignment of both query and reference sequences was created using *cmalign* [5] and query sequences were placed on the phylogenetic tree using *ppplacer* [6]. Taxonomy was assigned to each unique SV based on location on the tree. Taxonomic assignments were validated by inspection of multiple sequence alignments, phylogenetic trees and BLAST searches. Bacterial taxa represented by fewer than 25 reads

in a given sample were excluded from that sample to minimize environmental contaminant sequences from being included in the final dataset; bacterial taxa judged to be contaminants based on prevalence among negative controls (see Table below on Taxonomic Output for Negative Controls) were also removed from the final data set (see Table below on List of bacterial taxa filtered from the dataset).

### **Quantitative PCR**

Species-specific qPCR assays were developed to measure DNA concentrations of *Mycoplasma penetrans*, *Ureaplasma urealyticum*, *Haemophilus influenzae*, and *Trichomonas vaginalis*. Assays targeted the 16S rRNA genes of *M. penetrans* and *H. influenzae*, the urease accessory protein G gene of *U. urealyticum* (adapted from [7]), and the 18S rRNA gene of *T. vaginalis*. All assays underwent 45 cycles of amplification on the QuantStudio™ 6 Flex Real-Time PCR System (Applied Biosystems, Waltham, MA) in 15 µL reactions. Core reagents were supplied by Applied Biosystems (Waltham, CA). *U. urealyticum* and *H. influenzae* were run with TaqMan™ Fast Advanced Master Mix (1X) with primers at 0.8 µM per reaction and probe at 150 nM per reaction. *T. vaginalis* was run with TaqMan™ Fast Advanced Master Mix (1X) with primers at 0.9 µM per reaction and probe at 180 nM. *M. penetrans* was run with master mix containing buffer A (1X), deoxynucleotide triphosphates (1 mM), magnesium (4 mM), primers (1.2 µM), probe (200 nM), AmpErase uracil-N-glycosylase (0.015 U) and TaqGold polymerase (0.45 U) per reaction. Plasmid standards were run in duplicate with a lower limit of detection of 1.25 gene copies/µL DNA. Primer and probe sequences, as well as PCR conditions are listed in the table below. Specificity and sensitivity testing were conducted as previously described [8] and the bacteria tested for specificity assay are listed below.

Real-time PCR assays for adenovirus and HSV have been previously published [9, 10]. Briefly, the extracted DNA was diluted 2X and 10 µL of the diluted DNA was used for the assays. Each 30 µL adenovirus PCR reaction contained 15 µL of 2X QuantiTect multiplex PCR master mix (Qiagen, Hilden, Germany), 66 nM of B/E/C primers, 415 nM of A/F primers, 67 nM B/E/C probes, 100 nM A/F probes, and 0.03 units of uracil-N-glycosylase (UNG). Each 30 µL HSV typing quantification real-time PCR

reaction contained 15 µl of 2X QuantiTect multiplex PCR master mix, 830 nM primers, 150 nM HSV-1 probe (VIC/QSY), 100 nM HSV-2 probe (FAM/QSY) and 0.03 units of UNG. An internal amplification control (EXO) [11] was spiked in to all PCR reactions to monitor PCR inhibition and a negative result was accepted only if EXO was amplified and detected. Cycling conditions for both adenovirus and HSV assays included the following: 50°C for 2 minutes, 95°C for 15 minutes, followed by 45 cycles of 94°C for 1 minute and 60°C for 1 minute.

### Primer and Probe Sequences

| Target                        | Primer Sequences                                                               | Probe Sequences                                     | PCR Conditions                               |
|-------------------------------|--------------------------------------------------------------------------------|-----------------------------------------------------|----------------------------------------------|
| <i>Mycoplasma penetrans</i>   | 56F 5'- CGGACGAAGCACTTGTGCTT-3'<br>184R 5'-TTTTCTCATGCGATAGTAATGTCC-3'         | 5'-FAM-TAACATACCTTTTAGT-<br>GGGGGATAACTGGTTG-TAM-3' | 55°C Anneal 39 sec,<br>72°C Extension 30 sec |
| <i>Ureaplasma urealyticum</i> | 359F 5'- CAATTTACATCATCGACGTTGCC-3'<br>463R 5'-GAGCTAAATCAACTTTATTGATGATG-3'   | 5'-FAM-CCTCGTAAAGGCGGAC-<br>AAG-MGB-3'              | 56°C Anneal 30 sec,<br>72°C Extension 30 sec |
| <i>Haemophilus influenzae</i> | 957F 5'-GCCCCGTAGCTAACGTGATAAATCG-3'<br>1127R 5'-AAGCTCATCTCTGAGCTCTTCTTAGG-3' | 5'-FAM-CAAGCGGTGGAGCAT-<br>GTGGTTTAATT-TAMRA-3'     | 55°C Anneal 20 sec,<br>72°C Extension 20 sec |
| <i>Trichomonas vaginalis</i>  | Tvag_F 5'-CATTGACCACACGGACAAAAAG-3'<br>Tvag_R 5'-CGAAGTGCTCGAATGCCGA-3'        | 5' FAM-TCATTTCCGGATGGTCA-<br>AGCAGCCA-MGB 3'        | 60°C Anneal/ Extension<br>1 min              |

## Specificity Testing for *Mycoplasma penetrans*

|                                                         |                                      |
|---------------------------------------------------------|--------------------------------------|
| <i>Actinomyces urogenitalis</i>                         | <i>Megasphaera</i> species type 2    |
| <i>Aerococcus christensenii</i>                         | <i>Mobiluncus curtisii</i>           |
| <i>Aerococcus sanguinicola</i>                          | <i>Mobiluncus mulieris</i>           |
| <i>Anaerococcus tetradius</i>                           | <i>Mycoplasma genitalium</i>         |
| <i>Atopobium minutum</i>                                | <i>Mycoplasma hominis</i>            |
| <i>Atopobium parvulum</i>                               | <i>Mycoplasma microtii</i>           |
| <i>Atopobium vaginae</i>                                | <i>Mycoplasma penetrans</i>          |
| <i>Bifidobacterium bifidum</i>                          | <i>Mycoplasma pneumoniae</i>         |
| <i>Bifidobacterium longum</i>                           | <i>Parvimonas</i> species type 1     |
| <i>Brevibacterium lutescens</i>                         | <i>Parvimonas</i> species type 2     |
| BVAB1                                                   | <i>Peptoniphilus lacrimalis</i>      |
| BVAB2                                                   | <i>Porphyromonas asaccharolytica</i> |
| BVAB3 ( <i>Mageeibacillus indolicus</i> )               | <i>Porphyromonas</i> sp. type 1      |
| <i>Citrobacter koseri</i>                               | <i>Porphyromonas uenonis</i>         |
| <i>Corynebacterium amycolatum</i>                       | <i>Prevotella amnii</i>              |
| <i>Corynebacterium aurimucosum</i>                      | <i>Prevotella bivia</i>              |
| <i>Corynebacterium freneyii</i>                         | <i>Prevotella buccalis</i>           |
| <i>Dialister micraerophilus</i>                         | <i>Prevotella colorans</i>           |
| <i>Dialister</i> sp. type 2                             | <i>Prevotella denticola</i>          |
| <i>Eggerthella</i> sp. type 1                           | <i>Prevotella disiens</i>            |
| <i>Enterobacter aerogenes</i>                           | <i>Prevotella melaninogenica</i>     |
| <i>Enterococcus faecalis</i>                            | <i>Prevotella salivae</i>            |
| <i>Escherichia coli</i>                                 | <i>Prevotella timonensis</i>         |
| <i>Fingoldia magna</i>                                  | <i>Proteus mirabilis</i>             |
| <i>Fusobacterium nucleatum</i>                          | <i>Sneathia amnii</i>                |
| <i>Gardnerella vaginalis</i>                            | <i>Sneathia sanguinegens</i>         |
| <i>Gemella assacharolytica</i>                          | <i>Staphylococcus aureus</i>         |
| <i>Haemophilus influenzae</i>                           | <i>Staphylococcus capitis</i>        |
| <i>Haemophilus influenzae</i> biogroup <i>aegyptius</i> | <i>Staphylococcus epidermidis</i>    |
| <i>Haemophilus parainfluenzae</i>                       | <i>Staphylococcus haemolyticus</i>   |
| Human genomic DNA                                       | <i>Staphylococcus hominis</i>        |
| <i>Lactobacillus coleohominis</i>                       | <i>Staphylococcus lugdunensis</i>    |
| <i>Lactobacillus crispatus</i>                          | <i>Streptococcus agalactiae</i>      |
| <i>Lactobacillus gasseri</i>                            | <i>Streptococcus anginosus</i>       |
| <i>Lactobacillus iners</i>                              | <i>Streptococcus mitis</i>           |
| <i>Lactobacillus jensenii</i>                           | <i>Streptococcus salivarius</i>      |
| <i>Lactobacillus johnsonii</i>                          | <i>Ureaplasma parvum</i>             |
| <i>Lactobacillus vaginalis</i>                          | <i>Ureaplasma urealyticum</i>        |
| <i>Megasphaera micronuciformis</i>                      | <i>Veillonella montpellierensis</i>  |
| <i>Megasphaera</i> species type 1                       |                                      |

## Specificity Testing for *Ureaplasma urealyticum*

|                                                         |                                      |
|---------------------------------------------------------|--------------------------------------|
| <i>Actinomyces urogenitalis</i>                         | <i>Megasphaera</i> species type 2    |
| <i>Aerococcus sanguinicola</i>                          | <i>Mobiluncus curtisii</i>           |
| <i>Anaerococcus hydrogenalis</i>                        | <i>Mobiluncus mulieris</i>           |
| <i>Anaerococcus tetradius</i>                           | <i>Mycoplasma hominis</i>            |
| <i>Atopobium minutum</i>                                | <i>Parvimonas</i> species type 1     |
| <i>Atopobium parvulum</i>                               | <i>Parvimonas</i> species type 2     |
| <i>Atopobium vaginae</i>                                | <i>Peptoniphilus lacrimalis</i>      |
| <i>Bifidobacterium bifidum</i>                          | <i>Porphyromonas asaccharolytica</i> |
| <i>Bifidobacterium longum</i>                           | <i>Porphyromonas uenonis</i>         |
| <i>Brevibacterium lutescens</i>                         | <i>Prevotella amnii</i>              |
| <i>Citrobacter koseri</i>                               | <i>Prevotella bivia</i>              |
| <i>Corynebacterium amycolatum</i>                       | <i>Prevotella buccalis</i>           |
| <i>Corynebacterium aurimucosum</i>                      | <i>Prevotella colorans</i>           |
| <i>Corynebacterium freneyii</i>                         | <i>Prevotella denticola</i>          |
| <i>Corynebacterium pseudogenitalium</i>                 | <i>Prevotella disiens</i>            |
| <i>Dialister micraerophilus</i>                         | <i>Prevotella melaninogenica</i>     |
| <i>Enterobacter aerogenes</i>                           | <i>Prevotella salivae</i>            |
| <i>Enterococcus faecalis</i>                            | <i>Prevotella timonensis</i>         |
| <i>Escherichia coli</i>                                 | <i>Proteus mirabilis</i>             |
| <i>Fingoldia magna</i>                                  | <i>Sneathia amnii</i>                |
| <i>Fusobacterium nucleatum</i>                          | <i>Sneathia sanguinegens</i>         |
| <i>Gardnerella vaginalis</i>                            | <i>Staphylococcus aureus</i>         |
| <i>Haemophilus influenzae</i>                           | <i>Staphylococcus capitis</i>        |
| <i>Haemophilus influenzae</i> biogroup <i>aegyptius</i> | <i>Staphylococcus epidermidis</i>    |
| <i>Haemophilus parainfluenzae</i>                       | <i>Staphylococcus haemolyticus</i>   |
| Human genomic DNA                                       | <i>Staphylococcus hominis</i>        |
| <i>Lactobacillus coleohominis</i>                       | <i>Staphylococcus lugdunensis</i>    |
| <i>Lactobacillus crispatus</i>                          | <i>Streptococcus agalactiae</i>      |
| <i>Lactobacillus gasseri</i>                            | <i>Streptococcus anginosus</i>       |
| <i>Lactobacillus iners</i>                              | <i>Streptococcus mitis</i>           |
| <i>Lactobacillus jensenii</i>                           | <i>Streptococcus salivarius</i>      |
| <i>Lactobacillus johnsonii</i>                          | <i>Ureaplasma parvum</i>             |
| <i>Megasphaera micronuciformis</i>                      | <i>Ureaplasma urealyticum</i>        |
| <i>Megasphaera</i> species type 1                       | <i>Veillonella montpellierensis</i>  |

## Specificity Testing for *Haemophilus influenzae*

|                                                         |                                      |
|---------------------------------------------------------|--------------------------------------|
| <i>Actinomyces urogenitalis</i>                         | <i>Megasphaera elsdenii</i>          |
| <i>Aerococcus christensenii</i>                         | <i>Megasphaera micronuciformis</i>   |
| <i>Aerococcus sanguinicola</i>                          | <i>Megasphaera</i> species type 1    |
| <i>Anaerococcus hydrogenalis</i>                        | <i>Megasphaera</i> species type 2    |
| <i>Anaerococcus tetradius</i>                           | <i>Mobiluncus curtisii</i>           |
| <i>Atopobium minitum</i>                                | <i>Mobiluncus mulieris</i>           |
| <i>Atopobium parvulum</i>                               | <i>Mycoplasma genitalium</i>         |
| <i>Atopobium vaginae</i>                                | <i>Mycoplasma hominis</i>            |
| <i>Bifidobacterium bifidum</i>                          | <i>Mycoplasma microtii</i>           |
| <i>Brevibacterium lutescens</i>                         | <i>Mycoplasma penetrans</i>          |
| BVAB1                                                   | <i>Mycoplasma pneumoniae</i>         |
| BVAB2                                                   | <i>Parvimonas</i> species type 1     |
| BVAB3 ( <i>Mageeibacillus indolicus</i> )               | <i>Parvimonas</i> species type 2     |
| <i>Citrobacter koseri</i>                               | <i>Peptoniphilus lacrimalis</i>      |
| <i>Corynebacterium amycolatum</i>                       | <i>Porphyromonas asaccharolytica</i> |
| <i>Corynebacterium aurimucosum</i>                      | <i>Porphyromonas</i> sp. type 1      |
| <i>Corynebacterium freneyii</i>                         | <i>Porphyromonas uenonis</i>         |
| <i>Corynebacterium pseudogenitalium</i>                 | <i>Prevotella amnii</i>              |
| <i>Cutibacterium acnes</i>                              | <i>Prevotella bivia</i>              |
| <i>Dialister micraerophilus</i>                         | <i>Prevotella buccalis</i>           |
| <i>Dialister</i> sp. type 2                             | <i>Prevotella colorans</i>           |
| <i>Eggerthella</i> sp. type 1                           | <i>Prevotella denticola</i>          |
| <i>Enterobacter aerogenes</i>                           | <i>Prevotella disiens</i>            |
| <i>Enterococcus faecalis</i>                            | <i>Prevotella melaninogenica</i>     |
| <i>Escherichia coli</i>                                 | <i>Prevotella salivae</i>            |
| <i>Fingoldia magna</i>                                  | <i>Prevotella timonensis</i>         |
| <i>Fusobacterium nucleatum</i>                          | <i>Proteus mirabilis</i>             |
| <i>Gardnerella vaginalis</i>                            | <i>Sneathia amnii</i>                |
| <i>Gemella assacharolytica</i>                          | <i>Sneathia sanguinegens</i>         |
| <i>Haemophilus influenzae</i> biogroup <i>aegyptius</i> | <i>Staphylococcus epidermidis</i>    |
| <i>Haemophilus parainfluenzae</i>                       | <i>Staphylococcus hominis</i>        |
| Human genomic DNA                                       | <i>Staphylococcus lugdunensis</i>    |
| <i>Lactobacillus coleohominis</i>                       | <i>Streptococcus agalactiae</i>      |
| <i>Lactobacillus crispatus</i>                          | <i>Streptococcus anginosus</i>       |
| <i>Lactobacillus gasseri</i>                            | <i>Streptococcus mitis</i>           |
| <i>Lactobacillus iners</i>                              | <i>Ureaplasma parvum</i>             |
| <i>Lactobacillus jensenii</i>                           | <i>Ureaplasma urealyticum</i>        |
| <i>Lactobacillus johnsonii</i>                          | <i>Veillonella montpellierensis</i>  |

## Specificity Testing for *Trichomonas vaginalis*

|                                                         |                                      |
|---------------------------------------------------------|--------------------------------------|
| <i>Actinomyces urogenitalis</i>                         | <i>Megasphaera</i> species type 2    |
| <i>Aerococcus sanguinicola</i>                          | <i>Mobiluncus curtisii</i>           |
| <i>Anaerococcus hydrogenalis</i>                        | <i>Mobiluncus mulieris</i>           |
| <i>Anaerococcus tetradius</i>                           | <i>Mycoplasma genitalium</i>         |
| <i>Atopobium minutum</i>                                | <i>Mycoplasma hominis</i>            |
| <i>Atopobium parvulum</i>                               | <i>Mycoplasma microtii</i>           |
| <i>Atopobium vaginae</i>                                | <i>Mycoplasma penetrans</i>          |
| <i>Bifidobacterium bifidum</i>                          | <i>Mycoplasma pneumoniae</i>         |
| <i>Bifidobacterium longum</i>                           | <i>Parvimonas</i> species type 1     |
| <i>Brevibacterium lutescens</i>                         | <i>Parvimonas</i> species type 2     |
| <i>Citrobacter koseri</i>                               | <i>Peptoniphilus lacrimalis</i>      |
| <i>Corynebacterium amycolatum</i>                       | <i>Porphyromonas asaccharolytica</i> |
| <i>Corynebacterium aurimucosum</i>                      | <i>Porphyromonas uenonis</i>         |
| <i>Corynebacterium freneyii</i>                         | <i>Prevotella amnii</i>              |
| <i>Corynebacterium pseudogenitalium</i>                 | <i>Prevotella bivia</i>              |
| <i>Cutibacterium acnes</i>                              | <i>Prevotella buccalis</i>           |
| <i>Dialister micraerophilus</i>                         | <i>Prevotella colorans</i>           |
| <i>Eggerthella</i> sp. type 1                           | <i>Prevotella denticola</i>          |
| <i>Enterobacter aerogenes</i>                           | <i>Prevotella disiens</i>            |
| <i>Enterococcus faecalis</i>                            | <i>Prevotella melaninogenica</i>     |
| <i>Escherichia coli</i>                                 | <i>Prevotella salivae</i>            |
| <i>Fingoldia magna</i>                                  | <i>Prevotella timonensis</i>         |
| <i>Fusobacterium nucleatum</i>                          | <i>Proteus mirabilis</i>             |
| <i>Gardnerella vaginalis</i>                            | <i>Sneathia amnii</i>                |
| <i>Gemella assacharolytica</i>                          | <i>Sneathia sanguinegens</i>         |
| <i>Haemophilus influenzae</i>                           | <i>Staphylococcus aureus</i>         |
| <i>Haemophilus influenzae</i> biogroup <i>aegyptius</i> | <i>Staphylococcus capitis</i>        |
| <i>Haemophilus parainfluenzae</i>                       | <i>Staphylococcus epidermidis</i>    |
| Human genomic DNA                                       | <i>Staphylococcus haemolyticus</i>   |
| <i>Lactobacillus coleohominis</i>                       | <i>Staphylococcus hominis</i>        |
| <i>Lactobacillus crispatus</i>                          | <i>Staphylococcus lugdunensis</i>    |
| <i>Lactobacillus gasseri</i>                            | <i>Streptococcus agalactiae</i>      |
| <i>Lactobacillus iners</i>                              | <i>Streptococcus anginosus</i>       |
| <i>Lactobacillus jensenii</i>                           | <i>Streptococcus mitis</i>           |
| <i>Lactobacillus johnsonii</i>                          | <i>Streptococcus salivarius</i>      |
| <i>Lactobacillus vaginalis</i>                          | <i>Ureaplasma parvum</i>             |
| <i>Megasphaera micronuciformis</i>                      | <i>Ureaplasma urealyticum</i>        |
| <i>Megasphaera</i> species type 1                       | <i>Veillonella montpellierensis</i>  |

## REFERENCES

1. Preparation. SMSL. Available at: [https://www.illumina.com/content/dam/illumina-support/documents/documentation/chemistry\\_documentation/16s/16s-metagenomic-library-prep-guide-15044223-b.pdf](https://www.illumina.com/content/dam/illumina-support/documents/documentation/chemistry_documentation/16s/16s-metagenomic-library-prep-guide-15044223-b.pdf).
2. Hoffman NG. barcodecop. **2019**. Available at: <https://github.com/nhoffman/barcodecop>
3. Callahan BJ, McMurdie PJ, Rosen MJ, Han AW, Johnson AJ, Holmes SP. DADA2: High-resolution sample inference from Illumina amplicon data. *Nat Methods* **2016**; 13(7): 581-3.
4. Hoffman NG. ys16sdb. **2019**. Available at: <https://github.com/nhoffman/ya16sdb>.
5. Nawrocki EP, Eddy SR. Infernal 1.1: 100-fold faster RNA homology searches. *Bioinformatics* **2013**; 29(22): 2933-5.
6. Matsen FA, Kodner RB, Armbrust EV. pplacer: linear time maximum-likelihood and Bayesian phylogenetic placement of sequences onto a fixed reference tree. *BMC Bioinform* **2010**; 11: 538.
7. Vancutsem E, Soetens O, Breugelmans M, Foulon W, Naessens A. Modified real-time PCR for detecting, differentiating, and quantifying *Ureaplasma urealyticum* and *Ureaplasma parvum*. *J Mol Diagn* **2011**; 13(2): 206-12.
8. Fredricks DN, Fiedler TL, Thomas KK, Mitchell CM, Marrazzo JM. Changes in vaginal bacterial concentrations with intravaginal metronidazole therapy for bacterial vaginosis as assessed by quantitative PCR. *J Clin Microbiol* **2009**; 47(3): 721-6.
9. Corey L, Huang ML, Selke S, Wald A. Differentiation of herpes simplex virus types 1 and 2 in clinical samples by a real-time taqman PCR assay. *J Med Virol* **2005**; 76(3): 350-5.
10. Kuypers J, Wright N, Ferrenberg J, et al. Comparison of real-time PCR assays with fluorescent-antibody assays for diagnosis of respiratory virus infections in children. *J Clin Microbiol* **2006**; 44(7): 2382-8.
11. Pauk J, Huang ML, Brodie SJ, et al. Mucosal shedding of human herpesvirus 8 in men. *N Engl J Med* **2000**; 343(19): 1369-77.

# Taxonomic Output of Sequence Reads for Negative Controls: Buffer\_01 - Buffer\_20

| Species                                                 | buffer_01 | buffer_02 | buffer_03 | buffer_04 | buffer_05 | buffer_06 | buffer_07 | buffer_08 | buffer_09 | buffer_10 | buffer_11 | buffer_12 | buffer_13 | buffer_14 | buffer_15 | buffer_16 | buffer_17 | buffer_18 | buffer_19 | buffer_20 |
|---------------------------------------------------------|-----------|-----------|-----------|-----------|-----------|-----------|-----------|-----------|-----------|-----------|-----------|-----------|-----------|-----------|-----------|-----------|-----------|-----------|-----------|-----------|
| [Clostridium] hiranonis                                 | 0         | 0         | 0         | 0         | 0         | 0         | 0         | 0         | 0         | 0         | 0         | 0         | 0         | 0         | 6         | 0         | 0         | 0         | 0         | 0         |
| Acidovorax/Undibacterium                                | 0         | 0         | 0         | 0         | 0         | 0         | 0         | 0         | 0         | 0         | 0         | 0         | 0         | 0         | 0         | 0         | 0         | 0         | 0         | 0         |
| Acinetobacter haemolyticus/johnsonii                    | 0         | 0         | 0         | 0         | 0         | 0         | 0         | 0         | 0         | 0         | 0         | 8         | 0         | 0         | 8         | 0         | 0         | 22        | 0         | 0         |
| Acinetobacter haemolyticus/schindleri                   | 0         | 0         | 0         | 0         | 0         | 0         | 0         | 0         | 0         | 0         | 17        | 0         | 0         | 0         | 0         | 0         | 0         | 0         | 0         | 0         |
| Acinetobacter parvus                                    | 0         | 0         | 0         | 0         | 0         | 0         | 0         | 0         | 0         | 0         | 8         | 0         | 0         | 0         | 0         | 0         | 0         | 0         | 0         | 0         |
| Acinetobacter proteolyticus                             | 0         | 0         | 0         | 0         | 0         | 0         | 0         | 0         | 0         | 0         | 0         | 0         | 14        | 0         | 0         | 0         | 0         | 0         | 0         | 0         |
| Acinetobacter schindleri                                | 4         | 0         | 0         | 0         | 0         | 0         | 0         | 0         | 0         | 0         | 0         | 13        | 0         | 0         | 0         | 0         | 0         | 0         | 0         | 0         |
| Actinomyces oris/viscosus                               | 0         | 0         | 0         | 0         | 0         | 0         | 0         | 0         | 0         | 0         | 0         | 0         | 0         | 0         | 0         | 7         | 0         | 0         | 0         | 0         |
| Aerococcus urinaeequi/viridans                          | 0         | 0         | 0         | 0         | 0         | 0         | 0         | 0         | 0         | 0         | 0         | 0         | 0         | 0         | 12        | 0         | 7         | 0         | 0         | 0         |
| Aeromonas caviae                                        | 0         | 0         | 0         | 0         | 0         | 0         | 0         | 0         | 0         | 0         | 0         | 0         | 0         | 0         | 0         | 0         | 24        | 0         | 0         | 0         |
| Aeromonas veronii                                       | 0         | 0         | 0         | 0         | 0         | 0         | 0         | 0         | 0         | 34        | 0         | 0         | 0         | 0         | 0         | 0         | 0         | 0         | 0         | 0         |
| Afipia                                                  | 0         | 0         | 0         | 0         | 0         | 0         | 0         | 0         | 0         | 0         | 0         | 0         | 0         | 0         | 0         | 0         | 0         | 0         | 0         | 0         |
| Aggregatibacter aphrophilus                             | 0         | 0         | 0         | 0         | 0         | 0         | 0         | 0         | 0         | 0         | 0         | 0         | 0         | 0         | 0         | 0         | 0         | 0         | 0         | 0         |
| Alishewanella                                           | 0         | 0         | 0         | 0         | 0         | 0         | 0         | 0         | 0         | 11        | 0         | 0         | 0         | 0         | 0         | 0         | 0         | 0         | 0         | 0         |
| Alloiooccus                                             | 0         | 0         | 0         | 0         | 0         | 0         | 0         | 7         | 0         | 0         | 0         | 0         | 0         | 0         | 0         | 0         | 0         | 0         | 0         | 0         |
| Altererythrobacter epoxidivorans                        | 0         | 0         | 0         | 0         | 0         | 0         | 0         | 0         | 0         | 0         | 0         | 0         | 0         | 0         | 0         | 0         | 9         | 0         | 0         | 0         |
| Anaerococcus                                            | 0         | 0         | 0         | 0         | 0         | 0         | 0         | 0         | 0         | 0         | 0         | 0         | 0         | 0         | 0         | 0         | 0         | 0         | 0         | 0         |
| Anaerococcus lactolyticus                               | 0         | 0         | 0         | 0         | 0         | 0         | 0         | 0         | 0         | 0         | 0         | 0         | 0         | 0         | 0         | 0         | 0         | 0         | 0         | 0         |
| Anaerococcus octavius                                   | 0         | 0         | 0         | 0         | 0         | 0         | 0         | 0         | 0         | 0         | 0         | 0         | 0         | 0         | 0         | 0         | 0         | 0         | 0         | 0         |
| Anaerococcus prevotii/tetradius                         | 0         | 0         | 0         | 0         | 0         | 0         | 0         | 0         | 0         | 0         | 0         | 0         | 0         | 0         | 0         | 0         | 0         | 0         | 0         | 0         |
| Anaeromyxobacter                                        | 18        | 0         | 0         | 0         | 0         | 0         | 0         | 0         | 0         | 0         | 0         | 0         | 0         | 0         | 0         | 0         | 0         | 0         | 0         | 0         |
| Arenimonas                                              | 0         | 0         | 0         | 0         | 0         | 0         | 0         | 0         | 0         | 0         | 7         | 0         | 0         | 0         | 0         | 0         | 0         | 0         | 0         | 0         |
| Atopobium vaginae                                       | 0         | 0         | 0         | 0         | 0         | 0         | 0         | 0         | 0         | 0         | 0         | 0         | 0         | 0         | 0         | 0         | 0         | 0         | 3         | 0         |
| Bacillaceae                                             | 0         | 0         | 0         | 0         | 0         | 0         | 0         | 0         | 0         | 0         | 0         | 0         | 0         | 0         | 0         | 0         | 0         | 0         | 0         | 0         |
| Bacillus dakarensis                                     | 0         | 0         | 0         | 0         | 0         | 0         | 3         | 0         | 0         | 0         | 0         | 0         | 0         | 0         | 0         | 0         | 0         | 0         | 0         | 0         |
| Bacillus foraminis                                      | 0         | 0         | 0         | 0         | 0         | 0         | 0         | 0         | 0         | 0         | 0         | 0         | 0         | 0         | 0         | 0         | 0         | 0         | 0         | 0         |
| Bacillus idriensis                                      | 0         | 0         | 0         | 0         | 0         | 0         | 0         | 0         | 0         | 0         | 0         | 0         | 0         | 0         | 0         | 0         | 0         | 0         | 0         | 0         |
| Bacillus malikii                                        | 0         | 0         | 0         | 0         | 0         | 0         | 0         | 0         | 0         | 0         | 5         | 0         | 0         | 0         | 0         | 0         | 0         | 0         | 0         | 0         |
| Bacteroidales                                           | 0         | 0         | 0         | 0         | 0         | 0         | 0         | 0         | 0         | 0         | 0         | 0         | 0         | 0         | 0         | 0         | 0         | 0         | 0         | 0         |
| Bergeyella                                              | 0         | 0         | 0         | 0         | 0         | 0         | 0         | 0         | 0         | 0         | 0         | 0         | 0         | 0         | 0         | 0         | 0         | 0         | 0         | 0         |
| Betaproteobacteria                                      | 0         | 0         | 0         | 0         | 0         | 0         | 0         | 0         | 0         | 0         | 0         | 0         | 0         | 0         | 0         | 0         | 0         | 0         | 0         | 0         |
| Blastococcus endophyticus                               | 0         | 0         | 0         | 0         | 0         | 0         | 0         | 0         | 20        | 0         | 0         | 0         | 0         | 0         | 0         | 0         | 0         | 0         | 0         | 0         |
| Brevibacterium                                          | 0         | 0         | 0         | 0         | 0         | 0         | 0         | 0         | 0         | 0         | 0         | 0         | 0         | 0         | 0         | 0         | 0         | 0         | 0         | 0         |
| Brevibacterium casei                                    | 0         | 0         | 0         | 0         | 0         | 0         | 0         | 0         | 0         | 0         | 0         | 0         | 0         | 0         | 0         | 0         | 0         | 0         | 0         | 0         |
| Brevibacterium ihuae                                    | 0         | 0         | 0         | 0         | 0         | 0         | 0         | 0         | 0         | 0         | 0         | 0         | 0         | 0         | 11        | 0         | 0         | 0         | 0         | 0         |
| Brevundimonas                                           | 0         | 0         | 0         | 0         | 0         | 0         | 0         | 0         | 0         | 0         | 9         | 0         | 0         | 0         | 0         | 0         | 0         | 0         | 0         | 0         |
| Brevundimonas vesicularis                               | 0         | 0         | 0         | 0         | 0         | 0         | 0         | 0         | 0         | 5         | 0         | 0         | 0         | 0         | 0         | 0         | 20        | 0         | 0         | 0         |
| Brevundimonas/Caulobacter                               | 0         | 0         | 0         | 0         | 0         | 0         | 0         | 0         | 0         | 0         | 0         | 0         | 0         | 0         | 0         | 0         | 0         | 0         | 0         | 0         |
| Burkholderia pyrrocinia/stabilis                        | 0         | 0         | 0         | 0         | 0         | 0         | 0         | 0         | 0         | 0         | 0         | 0         | 0         | 0         | 0         | 0         | 0         | 0         | 0         | 0         |
| Burkholderiales Genera incertae sedis                   | 0         | 0         | 0         | 0         | 0         | 0         | 0         | 0         | 0         | 0         | 0         | 0         | 0         | 0         | 0         | 0         | 0         | 0         | 0         | 0         |
| Campylobacter rectus/showae                             | 0         | 0         | 0         | 0         | 0         | 0         | 0         | 0         | 0         | 13        | 0         | 0         | 0         | 0         | 0         | 0         | 0         | 0         | 0         | 0         |
| Candidatus Saccharibacteria                             | 0         | 0         | 0         | 0         | 0         | 0         | 0         | 0         | 0         | 0         | 0         | 0         | 0         | 0         | 0         | 0         | 0         | 0         | 0         | 0         |
| Candidatus Saccharimonas                                | 0         | 0         | 0         | 0         | 0         | 0         | 0         | 0         | 0         | 0         | 0         | 0         | 0         | 0         | 19        | 6         | 0         | 0         | 0         | 0         |
| Capnocytophaga                                          | 0         | 0         | 0         | 0         | 0         | 0         | 0         | 0         | 0         | 0         | 0         | 0         | 0         | 0         | 0         | 0         | 0         | 0         | 0         | 0         |
| Cardiobacterium hominis                                 | 0         | 0         | 0         | 0         | 0         | 0         | 0         | 0         | 0         | 0         | 0         | 0         | 0         | 0         | 0         | 0         | 0         | 0         | 0         | 0         |
| Carnobacteriaceae                                       | 0         | 0         | 0         | 0         | 0         | 0         | 0         | 0         | 0         | 0         | 0         | 0         | 0         | 0         | 0         | 0         | 0         | 0         | 0         | 0         |
| Carnobacterium inhibens/jetgali                         | 0         | 0         | 0         | 0         | 0         | 0         | 0         | 0         | 0         | 0         | 0         | 0         | 0         | 0         | 0         | 0         | 0         | 0         | 0         | 0         |
| Casaltella massiliensis                                 | 0         | 0         | 0         | 0         | 0         | 0         | 0         | 0         | 0         | 0         | 0         | 0         | 0         | 0         | 0         | 0         | 0         | 0         | 0         | 0         |
| Chelatococcus asaccharovorans                           | 0         | 0         | 0         | 0         | 0         | 0         | 0         | 0         | 0         | 0         | 0         | 0         | 0         | 0         | 0         | 0         | 0         | 0         | 0         | 0         |
| Chelatococcus/Methylobacterium                          | 0         | 0         | 0         | 0         | 0         | 0         | 0         | 0         | 0         | 0         | 0         | 0         | 0         | 0         | 0         | 0         | 0         | 0         | 0         | 0         |
| Chryseobacterium                                        | 0         | 0         | 0         | 0         | 0         | 0         | 0         | 0         | 0         | 0         | 0         | 0         | 0         | 0         | 0         | 0         | 0         | 0         | 0         | 0         |
| Chryseobacterium hominis                                | 0         | 0         | 0         | 0         | 0         | 0         | 0         | 0         | 0         | 0         | 0         | 0         | 0         | 0         | 0         | 0         | 0         | 0         | 0         | 0         |
| Chryseomicrobium amylolyticum                           | 0         | 0         | 0         | 0         | 0         | 0         | 0         | 0         | 0         | 11        | 0         | 0         | 0         | 0         | 0         | 0         | 0         | 0         | 0         | 0         |
| Cloacibacterium normanense                              | 0         | 0         | 0         | 0         | 0         | 0         | 0         | 0         | 0         | 0         | 6         | 0         | 0         | 0         | 0         | 4         | 0         | 0         | 0         | 0         |
| Clostridium                                             | 0         | 0         | 0         | 0         | 0         | 0         | 0         | 0         | 0         | 0         | 0         | 0         | 0         | 0         | 0         | 0         | 0         | 0         | 0         | 0         |
| Corynebacteriales                                       | 0         | 0         | 0         | 0         | 0         | 0         | 0         | 0         | 0         | 0         | 6         | 0         | 0         | 0         | 0         | 0         | 0         | 0         | 0         | 0         |
| Corynebacterium                                         | 0         | 0         | 0         | 0         | 0         | 0         | 0         | 0         | 0         | 0         | 6         | 0         | 0         | 0         | 0         | 0         | 0         | 0         | 0         | 0         |
| Corynebacterium accolens/macginleyi                     | 0         | 0         | 0         | 0         | 0         | 0         | 0         | 0         | 0         | 0         | 0         | 0         | 0         | 0         | 0         | 0         | 0         | 0         | 0         | 0         |
| Corynebacterium appendicis                              | 0         | 0         | 0         | 0         | 0         | 0         | 0         | 0         | 0         | 0         | 0         | 0         | 0         | 0         | 0         | 0         | 0         | 0         | 0         | 0         |
| Corynebacterium aurimucosum/minutissimum/singulare      | 0         | 0         | 0         | 0         | 0         | 0         | 0         | 0         | 0         | 0         | 0         | 0         | 0         | 0         | 0         | 0         | 0         | 0         | 0         | 0         |
| Corynebacterium coyleae                                 | 0         | 0         | 0         | 0         | 0         | 0         | 0         | 0         | 0         | 15        | 0         | 0         | 12        | 0         | 0         | 0         | 0         | 0         | 0         | 0         |
| Corynebacterium fournierii/mucifaciens/ureicelerivorans | 0         | 0         | 0         | 0         | 0         | 0         | 0         | 0         | 0         | 13        | 8         | 0         | 0         | 0         | 18        | 0         | 16        | 0         | 0         | 0         |
| Corynebacterium hadale/imitans                          | 0         | 0         | 0         | 0         | 0         | 0         | 0         | 0         | 0         | 0         | 0         | 0         | 0         | 0         | 0         | 0         | 0         | 0         | 0         | 0         |
| Corynebacterium pollutisoli                             | 0         | 0         | 0         | 0         | 0         | 0         | 0         | 0         | 0         | 22        | 0         | 0         | 0         | 0         | 0         | 0         | 0         | 0         | 0         | 0         |
| Corynebacterium propinquum/pseudodiphtheriticum         | 0         | 0         | 0         | 0         | 0         | 0         | 3         | 0         | 0         | 0         | 0         | 0         | 0         | 0         | 0         | 0         | 0         | 0         | 0         | 0         |
| Corynebacterium pseudogenitalium/tuberculostrictum      | 0         | 0         | 0         | 0         | 0         | 0         | 0         | 0         | 0         | 19        | 12        | 0         | 0         | 0         | 0         | 0         | 0         | 0         | 0         | 0         |
| Craurococcus roseus                                     | 16        | 0         | 0         | 0         | 0         | 0         | 0         | 0         | 0         | 0         | 0         | 0         | 0         | 0         | 0         | 0         | 0         | 0         | 0         | 0         |
| Curvibacter                                             | 0         | 0         | 0         | 0         | 0         | 0         | 0         | 0         | 0         | 0         | 0         | 0         | 50        | 0         | 0         | 0         | 17        | 5         | 0         | 0         |



# Buffer\_01 - Buffer\_20

| Species                                                               | buffer_01 | buffer_02 | buffer_03 | buffer_04 | buffer_05 | buffer_06 | buffer_07 | buffer_08 | buffer_09 | buffer_10 | buffer_11 | buffer_12 | buffer_13 | buffer_14 | buffer_15 | buffer_16 | buffer_17 | buffer_18 | buffer_19 | buffer_20 |
|-----------------------------------------------------------------------|-----------|-----------|-----------|-----------|-----------|-----------|-----------|-----------|-----------|-----------|-----------|-----------|-----------|-----------|-----------|-----------|-----------|-----------|-----------|-----------|
| Noviherbaspirillum                                                    | 0         | 0         | 0         | 0         | 0         | 0         | 0         | 0         | 0         | 0         | 0         | 0         | 0         | 0         | 13        | 0         | 0         | 0         | 0         | 0         |
| Novosphingobium pentaromativorans/resinovorum                         | 0         | 0         | 0         | 0         | 0         | 0         | 0         | 0         | 0         | 0         | 0         | 0         | 0         | 0         | 0         | 0         | 0         | 0         | 0         | 0         |
| Paenibacillus                                                         | 0         | 0         | 0         | 0         | 0         | 0         | 0         | 0         | 0         | 0         | 0         | 0         | 0         | 0         | 0         | 0         | 0         | 0         | 0         | 0         |
| Pantoea agglomerans/dispersa                                          | 0         | 0         | 0         | 0         | 0         | 0         | 0         | 0         | 0         | 0         | 0         | 0         | 0         | 0         | 0         | 0         | 8         | 0         | 0         | 0         |
| Pantoea stewartii                                                     | 0         | 0         | 0         | 0         | 0         | 0         | 0         | 0         | 0         | 0         | 0         | 0         | 0         | 0         | 0         | 0         | 0         | 0         | 0         | 0         |
| Paracoccus                                                            | 0         | 0         | 0         | 0         | 0         | 0         | 0         | 0         | 0         | 0         | 0         | 0         | 0         | 0         | 0         | 0         | 0         | 0         | 0         | 0         |
| Peptoniphilus asaccharolyticus/grossensis/harei/phoceensis/rhinitidis | 0         | 0         | 0         | 0         | 0         | 0         | 0         | 0         | 0         | 0         | 0         | 0         | 0         | 0         | 0         | 0         | 0         | 0         | 7         | 0         |
| Phycoccus                                                             | 0         | 0         | 0         | 0         | 0         | 0         | 0         | 0         | 0         | 0         | 0         | 0         | 0         | 0         | 0         | 0         | 0         | 0         | 0         | 0         |
| Pontibacter                                                           | 0         | 0         | 0         | 0         | 0         | 0         | 0         | 0         | 0         | 12        | 0         | 0         | 0         | 0         | 0         | 0         | 0         | 0         | 0         | 0         |
| Porphyromonas                                                         | 0         | 0         | 0         | 0         | 0         | 0         | 0         | 0         | 0         | 0         | 0         | 0         | 0         | 0         | 0         | 0         | 0         | 0         | 0         | 0         |
| Prevotella                                                            | 0         | 0         | 0         | 0         | 0         | 0         | 0         | 0         | 0         | 0         | 0         | 0         | 8         | 7         | 0         | 0         | 0         | 11        | 0         | 0         |
| Prevotella amnii                                                      | 0         | 0         | 0         | 0         | 0         | 0         | 0         | 0         | 0         | 0         | 0         | 0         | 0         | 0         | 0         | 0         | 0         | 0         | 0         | 0         |
| Prevotella disiens                                                    | 0         | 0         | 0         | 0         | 0         | 0         | 0         | 0         | 0         | 0         | 0         | 0         | 0         | 0         | 0         | 0         | 0         | 0         | 6         | 0         |
| Prevotella melaninogenica                                             | 0         | 0         | 0         | 0         | 0         | 0         | 0         | 0         | 0         | 0         | 0         | 0         | 8         | 0         | 0         | 0         | 0         | 0         | 87        | 0         |
| Prevotella timonensis                                                 | 0         | 7         | 0         | 0         | 0         | 0         | 0         | 0         | 0         | 0         | 0         | 0         | 0         | 0         | 0         | 0         | 0         | 0         | 0         | 0         |
| Pseudoclavibacter                                                     | 0         | 0         | 0         | 0         | 0         | 0         | 0         | 0         | 0         | 0         | 0         | 0         | 0         | 0         | 0         | 0         | 0         | 0         | 0         | 0         |
| Pseudomonas antarctica/fluorescens                                    | 0         | 0         | 0         | 0         | 0         | 0         | 0         | 0         | 0         | 0         | 0         | 0         | 0         | 0         | 0         | 0         | 0         | 0         | 0         | 0         |
| Pseudomonas baetica                                                   | 0         | 0         | 0         | 0         | 0         | 0         | 0         | 0         | 0         | 0         | 0         | 0         | 0         | 0         | 0         | 0         | 0         | 0         | 0         | 0         |
| Pseudomonas fluorescens/koreensis                                     | 0         | 0         | 0         | 0         | 0         | 0         | 0         | 0         | 0         | 0         | 0         | 0         | 0         | 0         | 0         | 0         | 0         | 0         | 0         | 0         |
| Pseudomonas gessardii                                                 | 0         | 0         | 0         | 0         | 0         | 0         | 0         | 0         | 0         | 18        | 0         | 0         | 0         | 0         | 0         | 0         | 0         | 0         | 0         | 0         |
| Pseudomonas monteilii                                                 | 0         | 0         | 0         | 0         | 0         | 0         | 0         | 0         | 0         | 19        | 0         | 0         | 0         | 0         | 0         | 0         | 0         | 0         | 0         | 0         |
| Pseudomonas oleovorans/pseudoalcaligenes group                        | 0         | 0         | 0         | 0         | 0         | 0         | 0         | 0         | 0         | 0         | 0         | 0         | 0         | 0         | 0         | 0         | 0         | 0         | 0         | 0         |
| Pseudomonas resinovorans                                              | 0         | 0         | 0         | 0         | 0         | 0         | 0         | 0         | 0         | 0         | 0         | 0         | 0         | 0         | 0         | 0         | 0         | 0         | 0         | 0         |
| Pseudomonas stutzeri group                                            | 0         | 0         | 0         | 0         | 0         | 0         | 0         | 0         | 0         | 0         | 0         | 0         | 0         | 0         | 13        | 0         | 17        | 0         | 0         | 0         |
| Pseudomonas stutzeri subgroup                                         | 0         | 0         | 0         | 0         | 0         | 0         | 0         | 0         | 0         | 0         | 0         | 0         | 0         | 0         | 0         | 0         | 0         | 0         | 0         | 0         |
| Pseudomonas veronii                                                   | 0         | 0         | 0         | 0         | 0         | 0         | 0         | 0         | 0         | 0         | 0         | 0         | 0         | 0         | 0         | 0         | 9         | 0         | 0         | 0         |
| Pseudoxanthomonas indica                                              | 0         | 0         | 0         | 0         | 0         | 0         | 0         | 0         | 0         | 0         | 0         | 0         | 0         | 0         | 0         | 0         | 0         | 0         | 0         | 0         |
| Pseudoxanthomonas mexicana                                            | 0         | 0         | 0         | 0         | 0         | 0         | 0         | 0         | 0         | 0         | 0         | 0         | 0         | 0         | 0         | 0         | 0         | 0         | 0         | 0         |
| Psychrobacter alimentarius                                            | 0         | 0         | 0         | 0         | 0         | 0         | 0         | 0         | 0         | 0         | 0         | 0         | 0         | 0         | 0         | 0         | 0         | 0         | 0         | 0         |
| Rheinheimera                                                          | 0         | 0         | 0         | 0         | 0         | 0         | 0         | 0         | 0         | 0         | 0         | 0         | 0         | 0         | 0         | 0         | 0         | 0         | 0         | 0         |
| Rheinheimera perlucida                                                | 0         | 0         | 0         | 0         | 0         | 0         | 0         | 0         | 0         | 0         | 0         | 0         | 0         | 0         | 0         | 0         | 0         | 0         | 0         | 0         |
| Rhodobacter                                                           | 0         | 0         | 0         | 0         | 0         | 0         | 0         | 0         | 0         | 0         | 0         | 0         | 0         | 0         | 0         | 0         | 0         | 0         | 0         | 0         |
| Rhodobacteraceae                                                      | 0         | 0         | 0         | 0         | 0         | 0         | 0         | 0         | 0         | 0         | 0         | 0         | 0         | 0         | 0         | 0         | 0         | 0         | 0         | 0         |
| Rhodococcus corynebacterioides/kroppenstedtii                         | 0         | 0         | 0         | 0         | 0         | 0         | 0         | 0         | 0         | 7         | 0         | 0         | 0         | 0         | 0         | 0         | 0         | 0         | 0         | 0         |
| Romboutsia timonensis                                                 | 0         | 0         | 0         | 0         | 0         | 0         | 0         | 0         | 0         | 0         | 7         | 0         | 0         | 0         | 0         | 0         | 0         | 0         | 0         | 0         |
| Rothia                                                                | 0         | 0         | 0         | 0         | 0         | 0         | 0         | 0         | 0         | 0         | 0         | 0         | 0         | 0         | 0         | 29        | 0         | 0         | 0         | 0         |
| Rothia amarae                                                         | 0         | 0         | 0         | 0         | 0         | 0         | 0         | 0         | 0         | 0         | 0         | 0         | 0         | 0         | 11        | 0         | 0         | 0         | 0         | 0         |
| Saccharopolyspora                                                     | 0         | 0         | 0         | 0         | 0         | 0         | 0         | 0         | 0         | 0         | 0         | 0         | 0         | 0         | 0         | 0         | 0         | 0         | 0         | 0         |
| Shigella/Escherichia                                                  | 0         | 0         | 0         | 0         | 0         | 0         | 6         | 41        | 12        | 95        | 0         | 0         | 0         | 0         | 0         | 0         | 0         | 0         | 0         | 0         |
| Sneathia                                                              | 0         | 0         | 0         | 0         | 0         | 0         | 0         | 0         | 0         | 0         | 0         | 0         | 0         | 0         | 0         | 0         | 0         | 0         | 0         | 0         |
| Sneathia amnii                                                        | 0         | 0         | 0         | 0         | 0         | 0         | 0         | 0         | 0         | 0         | 0         | 0         | 7         | 0         | 0         | 0         | 0         | 0         | 652       | 0         |
| Sneathia sanguinigena                                                 | 0         | 0         | 0         | 0         | 0         | 0         | 0         | 0         | 0         | 0         | 0         | 0         | 0         | 0         | 0         | 0         | 0         | 0         | 0         | 0         |
| Sphingobium yanoikuyae                                                | 0         | 0         | 0         | 0         | 0         | 0         | 0         | 0         | 0         | 0         | 0         | 0         | 0         | 0         | 0         | 0         | 0         | 0         | 0         | 0         |
| Sphingomonas kaistensis                                               | 0         | 0         | 0         | 0         | 0         | 4         | 0         | 0         | 0         | 0         | 0         | 0         | 0         | 0         | 0         | 0         | 0         | 0         | 0         | 0         |
| Sphingomonas starnbergensis                                           | 0         | 0         | 0         | 0         | 0         | 0         | 0         | 0         | 0         | 0         | 0         | 0         | 0         | 0         | 0         | 0         | 0         | 0         | 0         | 21        |
| Staphylococcus aureus                                                 | 0         | 0         | 0         | 0         | 0         | 0         | 0         | 0         | 0         | 0         | 0         | 0         | 0         | 0         | 0         | 0         | 0         | 0         | 0         | 0         |
| Staphylococcus capitis/caprae                                         | 0         | 0         | 0         | 0         | 0         | 0         | 0         | 0         | 0         | 0         | 0         | 8         | 0         | 0         | 0         | 13        | 0         | 0         | 10        | 0         |
| Staphylococcus caprae/cohnii/epidermidis                              | 0         | 0         | 0         | 0         | 0         | 0         | 0         | 0         | 0         | 37        | 0         | 0         | 3         | 0         | 46        | 0         | 0         | 0         | 0         | 0         |
| Staphylococcus cohnii/saprophyticus                                   | 0         | 0         | 0         | 0         | 0         | 0         | 0         | 0         | 0         | 0         | 0         | 0         | 0         | 0         | 0         | 0         | 0         | 0         | 0         | 0         |
| Staphylococcus epidermidis/hominis                                    | 0         | 0         | 0         | 0         | 0         | 0         | 0         | 0         | 0         | 0         | 0         | 0         | 0         | 0         | 0         | 0         | 0         | 0         | 0         | 0         |
| Staphylococcus equorum/saprophyticus/xylosus                          | 0         | 0         | 0         | 0         | 0         | 0         | 0         | 0         | 0         | 0         | 0         | 0         | 0         | 0         | 0         | 0         | 0         | 0         | 0         | 0         |
| Staphylococcus haemolyticus                                           | 0         | 0         | 0         | 0         | 0         | 0         | 0         | 0         | 0         | 0         | 0         | 0         | 0         | 0         | 0         | 0         | 0         | 0         | 0         | 0         |
| Streptococcus                                                         | 0         | 0         | 0         | 0         | 0         | 0         | 0         | 0         | 0         | 0         | 0         | 0         | 0         | 0         | 0         | 0         | 0         | 0         | 0         | 0         |
| Streptococcus agalactiae                                              | 3         | 0         | 0         | 44        | 0         | 0         | 0         | 5         | 0         | 0         | 0         | 0         | 0         | 0         | 0         | 0         | 0         | 0         | 0         | 0         |
| Streptococcus anginosus                                               | 0         | 0         | 0         | 6         | 0         | 18        | 0         | 0         | 0         | 0         | 0         | 0         | 0         | 0         | 0         | 0         | 0         | 0         | 0         | 0         |
| Streptococcus mitis group                                             | 0         | 0         | 0         | 0         | 28        | 0         | 13        | 23        | 36        | 34        | 13        | 0         | 12        | 8         | 9         | 0         | 0         | 16        | 28        | 0         |
| Thiopsedomonas                                                        | 0         | 0         | 0         | 0         | 0         | 0         | 0         | 0         | 0         | 0         | 0         | 0         | 0         | 0         | 0         | 0         | 0         | 0         | 0         | 0         |
| Turicella otitidis                                                    | 19        | 0         | 0         | 0         | 0         | 0         | 0         | 11        | 0         | 0         | 0         | 0         | 0         | 0         | 0         | 0         | 0         | 0         | 0         | 0         |
| unclassified Clostridiales                                            | 0         | 0         | 0         | 0         | 0         | 0         | 0         | 0         | 0         | 0         | 0         | 0         | 0         | 0         | 0         | 0         | 0         | 0         | 0         | 0         |
| Undibacterium                                                         | 0         | 0         | 0         | 0         | 0         | 0         | 0         | 0         | 0         | 0         | 0         | 0         | 0         | 0         | 0         | 0         | 0         | 0         | 0         | 0         |
| Variovorax gossypii                                                   | 0         | 0         | 0         | 0         | 0         | 0         | 0         | 0         | 0         | 0         | 0         | 0         | 0         | 0         | 0         | 0         | 0         | 0         | 0         | 0         |
| Veillonella                                                           | 0         | 0         | 0         | 0         | 0         | 0         | 0         | 0         | 0         | 0         | 0         | 0         | 0         | 0         | 0         | 0         | 0         | 0         | 0         | 0         |
| Veillonella dispar/parvula                                            | 0         | 0         | 0         | 0         | 0         | 0         | 0         | 0         | 0         | 0         | 0         | 0         | 0         | 0         | 9         | 0         | 0         | 0         | 0         | 0         |
| Veillonella montpellierensis                                          | 0         | 0         | 0         | 0         | 0         | 13        | 0         | 0         | 0         | 0         | 0         | 5         | 10        | 0         | 0         | 0         | 0         | 0         | 0         | 0         |
| Williamsia faeni/muralis                                              | 0         | 0         | 0         | 0         | 0         | 0         | 0         | 0         | 0         | 0         | 0         | 0         | 0         | 0         | 14        | 0         | 0         | 0         | 0         | 0         |
| Zoogloea resiniphila                                                  | 0         | 0         | 0         | 0         | 0         | 0         | 0         | 0         | 0         | 10        | 0         | 0         | 0         | 0         | 4         | 0         | 0         | 0         | 0         | 0         |

## Buffer\_21 - Buffer\_40

| Species                                                | buffer_21 | buffer_22 | buffer_23 | buffer_24 | buffer_25 | buffer_26 | buffer_27 | buffer_28 | buffer_29 | buffer_30 | buffer_31 | buffer_32 | buffer_33 | buffer_34 | buffer_35 | buffer_36 | buffer_37 | buffer_38 | buffer_39 | buffer_40 |
|--------------------------------------------------------|-----------|-----------|-----------|-----------|-----------|-----------|-----------|-----------|-----------|-----------|-----------|-----------|-----------|-----------|-----------|-----------|-----------|-----------|-----------|-----------|
| [Clostridium] hiranonis                                | 0         | 0         | 0         | 0         | 0         | 0         | 0         | 0         | 0         | 0         | 0         | 0         | 0         | 0         | 0         | 0         | 0         | 0         | 0         | 0         |
| Acidovorax/Undibacterium                               | 0         | 0         | 0         | 0         | 0         | 0         | 0         | 0         | 0         | 0         | 0         | 0         | 0         | 0         | 14        | 0         | 0         | 0         | 0         | 0         |
| Acinetobacter haemolyticus/johnsonii                   | 0         | 0         | 0         | 0         | 0         | 0         | 0         | 0         | 0         | 0         | 0         | 0         | 0         | 0         | 0         | 20        | 0         | 0         | 0         | 0         |
| Acinetobacter haemolyticus/schindleri                  | 0         | 0         | 0         | 0         | 0         | 0         | 0         | 0         | 0         | 0         | 0         | 0         | 0         | 0         | 0         | 0         | 0         | 0         | 0         | 0         |
| Acinetobacter parvus                                   | 0         | 0         | 0         | 0         | 0         | 0         | 0         | 0         | 0         | 0         | 0         | 0         | 0         | 0         | 0         | 0         | 0         | 19        | 0         | 0         |
| Acinetobacter proteolyticus                            | 0         | 0         | 0         | 0         | 0         | 0         | 0         | 0         | 0         | 0         | 0         | 0         | 0         | 0         | 0         | 0         | 0         | 0         | 0         | 0         |
| Acinetobacter schindleri                               | 0         | 0         | 0         | 0         | 0         | 0         | 0         | 0         | 0         | 0         | 0         | 0         | 0         | 0         | 0         | 0         | 35        | 0         | 0         | 0         |
| Actinomyces oris/viscosus                              | 0         | 0         | 0         | 0         | 0         | 0         | 0         | 0         | 0         | 0         | 0         | 0         | 0         | 0         | 0         | 0         | 0         | 0         | 0         | 0         |
| Aerococcus urinaeequi/viridans                         | 0         | 0         | 0         | 0         | 0         | 0         | 0         | 0         | 0         | 0         | 0         | 0         | 0         | 0         | 0         | 0         | 0         | 0         | 0         | 0         |
| Aeromonas caviae                                       | 0         | 0         | 0         | 0         | 0         | 0         | 0         | 0         | 0         | 0         | 0         | 0         | 0         | 0         | 0         | 0         | 0         | 0         | 0         | 0         |
| Aeromonas veronii                                      | 0         | 0         | 0         | 0         | 0         | 0         | 0         | 0         | 0         | 0         | 0         | 0         | 0         | 0         | 0         | 0         | 0         | 0         | 0         | 0         |
| Afipia                                                 | 0         | 0         | 0         | 0         | 0         | 0         | 0         | 0         | 0         | 0         | 0         | 0         | 0         | 0         | 0         | 0         | 0         | 0         | 0         | 0         |
| Aggregatibacter aphrophilus                            | 0         | 0         | 0         | 0         | 0         | 0         | 0         | 0         | 0         | 0         | 0         | 0         | 0         | 0         | 0         | 0         | 0         | 4         | 0         | 0         |
| Alishewanella                                          | 0         | 0         | 0         | 12        | 0         | 0         | 0         | 0         | 0         | 0         | 0         | 0         | 0         | 0         | 0         | 0         | 0         | 0         | 0         | 0         |
| Alloiooccus                                            | 0         | 0         | 0         | 0         | 0         | 0         | 0         | 0         | 0         | 0         | 0         | 0         | 0         | 0         | 0         | 0         | 0         | 0         | 0         | 0         |
| Altererythrobacter epoxidivorans                       | 0         | 0         | 0         | 0         | 0         | 0         | 0         | 0         | 0         | 0         | 0         | 0         | 0         | 0         | 0         | 0         | 0         | 0         | 0         | 0         |
| Anaerococcus                                           | 0         | 0         | 0         | 0         | 0         | 0         | 0         | 0         | 0         | 0         | 3         | 0         | 0         | 0         | 0         | 0         | 0         | 0         | 0         | 0         |
| Anaerococcus lactolyticus                              | 0         | 0         | 0         | 0         | 0         | 0         | 0         | 0         | 0         | 0         | 0         | 0         | 0         | 0         | 0         | 0         | 0         | 0         | 0         | 0         |
| Anaerococcus octavius                                  | 0         | 0         | 0         | 0         | 0         | 0         | 0         | 0         | 0         | 0         | 0         | 0         | 0         | 2         | 0         | 0         | 0         | 0         | 0         | 0         |
| Anaerococcus prevotii/tetradius                        | 0         | 0         | 0         | 0         | 0         | 0         | 0         | 0         | 0         | 0         | 0         | 0         | 0         | 0         | 0         | 11        | 0         | 0         | 0         | 0         |
| Anaeromyxobacter                                       | 0         | 0         | 0         | 0         | 0         | 0         | 0         | 0         | 0         | 0         | 0         | 0         | 0         | 0         | 0         | 0         | 0         | 0         | 0         | 0         |
| Arenimonas                                             | 0         | 0         | 0         | 0         | 0         | 0         | 0         | 0         | 0         | 0         | 0         | 0         | 0         | 0         | 0         | 0         | 0         | 0         | 0         | 5         |
| Atopobium vaginae                                      | 0         | 0         | 0         | 0         | 0         | 0         | 0         | 0         | 0         | 0         | 0         | 0         | 0         | 0         | 0         | 0         | 0         | 0         | 0         | 0         |
| Bacillaceae                                            | 0         | 0         | 0         | 0         | 0         | 0         | 0         | 0         | 0         | 0         | 0         | 0         | 0         | 0         | 0         | 0         | 0         | 0         | 0         | 0         |
| Bacillus dakarensis                                    | 0         | 0         | 0         | 0         | 0         | 0         | 0         | 0         | 0         | 0         | 0         | 0         | 0         | 0         | 0         | 0         | 0         | 0         | 0         | 0         |
| Bacillus foraminis                                     | 0         | 0         | 0         | 0         | 0         | 0         | 0         | 0         | 0         | 0         | 0         | 0         | 0         | 0         | 7         | 0         | 0         | 0         | 0         | 0         |
| Bacillus idriensis                                     | 7         | 0         | 0         | 0         | 0         | 0         | 0         | 0         | 0         | 0         | 0         | 0         | 0         | 0         | 0         | 0         | 0         | 0         | 24        | 0         |
| Bacillus malikii                                       | 0         | 0         | 0         | 0         | 0         | 0         | 0         | 0         | 0         | 0         | 0         | 0         | 0         | 0         | 7         | 0         | 0         | 0         | 0         | 0         |
| Bacteroidales                                          | 0         | 0         | 0         | 0         | 0         | 0         | 0         | 0         | 0         | 0         | 0         | 0         | 0         | 0         | 0         | 0         | 0         | 0         | 0         | 0         |
| Bergeyella                                             | 0         | 0         | 0         | 0         | 0         | 0         | 0         | 0         | 0         | 0         | 0         | 0         | 0         | 0         | 0         | 0         | 10        | 0         | 0         | 0         |
| Betaproteobacteria                                     | 0         | 0         | 0         | 0         | 0         | 0         | 0         | 0         | 0         | 0         | 0         | 0         | 0         | 0         | 0         | 0         | 0         | 0         | 0         | 0         |
| Blastococcus endophyticus                              | 0         | 0         | 0         | 0         | 0         | 0         | 0         | 0         | 0         | 0         | 0         | 0         | 0         | 0         | 0         | 0         | 0         | 0         | 0         | 0         |
| Brevibacterium                                         | 0         | 0         | 0         | 0         | 0         | 0         | 0         | 0         | 0         | 0         | 0         | 0         | 0         | 0         | 0         | 0         | 0         | 0         | 0         | 0         |
| Brevibacterium casei                                   | 0         | 0         | 0         | 0         | 0         | 0         | 0         | 0         | 0         | 0         | 0         | 0         | 0         | 0         | 0         | 0         | 12        | 0         | 0         | 0         |
| Brevibacterium ihuae                                   | 0         | 0         | 0         | 0         | 0         | 0         | 0         | 0         | 0         | 0         | 0         | 0         | 0         | 0         | 0         | 0         | 0         | 0         | 0         | 0         |
| Brevundimonas                                          | 0         | 0         | 0         | 0         | 0         | 0         | 0         | 0         | 0         | 0         | 0         | 0         | 0         | 0         | 0         | 0         | 0         | 0         | 0         | 0         |
| Brevundimonas vesicularis                              | 0         | 0         | 0         | 0         | 0         | 0         | 0         | 0         | 0         | 0         | 0         | 0         | 0         | 0         | 0         | 0         | 19        | 0         | 0         | 0         |
| Brevundimonas/Caulobacter                              | 0         | 7         | 0         | 0         | 0         | 0         | 0         | 0         | 0         | 0         | 0         | 0         | 0         | 0         | 0         | 0         | 0         | 0         | 0         | 0         |
| Burkholderia pyrrocinia/stabilis                       | 0         | 0         | 0         | 0         | 0         | 0         | 0         | 0         | 0         | 0         | 0         | 0         | 0         | 0         | 0         | 0         | 0         | 0         | 0         | 0         |
| Burkholderiales Genera incertae sedis                  | 0         | 0         | 0         | 0         | 0         | 0         | 0         | 0         | 0         | 0         | 0         | 0         | 0         | 0         | 0         | 0         | 0         | 0         | 0         | 0         |
| Campylobacter rectus/showae                            | 0         | 0         | 0         | 0         | 0         | 0         | 0         | 0         | 0         | 0         | 0         | 0         | 0         | 0         | 0         | 0         | 0         | 0         | 0         | 0         |
| Candidatus Saccharibacteria                            | 0         | 0         | 0         | 0         | 0         | 0         | 0         | 0         | 0         | 8         | 0         | 0         | 0         | 0         | 0         | 0         | 0         | 0         | 0         | 0         |
| Candidatus Saccharimonas                               | 0         | 0         | 0         | 0         | 0         | 0         | 0         | 0         | 0         | 0         | 0         | 0         | 0         | 0         | 0         | 0         | 0         | 0         | 0         | 0         |
| Capnocytophaga                                         | 0         | 0         | 0         | 0         | 0         | 0         | 0         | 0         | 0         | 0         | 0         | 0         | 0         | 0         | 0         | 0         | 0         | 0         | 0         | 0         |
| Cardiobacterium hominis                                | 0         | 0         | 0         | 0         | 0         | 0         | 0         | 0         | 0         | 0         | 0         | 0         | 0         | 0         | 0         | 0         | 0         | 5         | 0         | 0         |
| Carnobacteriaceae                                      | 0         | 0         | 0         | 0         | 0         | 0         | 0         | 0         | 0         | 0         | 0         | 0         | 0         | 0         | 0         | 0         | 7         | 0         | 0         | 0         |
| Carnobacterium inihbens/jeotgali                       | 0         | 0         | 0         | 0         | 0         | 0         | 0         | 0         | 0         | 0         | 0         | 0         | 0         | 0         | 0         | 0         | 13        | 0         | 0         | 0         |
| Casaltella massiliensis                                | 0         | 0         | 0         | 0         | 0         | 0         | 0         | 0         | 0         | 0         | 0         | 0         | 0         | 0         | 8         | 0         | 0         | 0         | 0         | 0         |
| Chelatococcus asaccharovorans                          | 0         | 0         | 0         | 0         | 0         | 3         | 0         | 0         | 0         | 0         | 0         | 0         | 0         | 0         | 0         | 0         | 0         | 0         | 0         | 0         |
| Chelatococcus/Methylobacterium                         | 0         | 0         | 0         | 0         | 0         | 0         | 0         | 0         | 0         | 0         | 0         | 0         | 0         | 0         | 0         | 0         | 0         | 0         | 0         | 0         |
| Chryseobacterium                                       | 0         | 0         | 0         | 0         | 0         | 0         | 0         | 0         | 0         | 0         | 0         | 0         | 0         | 0         | 3         | 0         | 0         | 0         | 0         | 0         |
| Chryseobacterium hominis                               | 0         | 0         | 0         | 0         | 0         | 0         | 0         | 0         | 0         | 0         | 0         | 0         | 0         | 0         | 0         | 0         | 0         | 0         | 0         | 0         |
| Chryseomicrobium amylolyticum                          | 0         | 0         | 0         | 0         | 0         | 0         | 0         | 0         | 0         | 0         | 0         | 0         | 0         | 0         | 0         | 0         | 0         | 0         | 0         | 0         |
| Cloacibacterium normanense                             | 0         | 0         | 0         | 0         | 0         | 0         | 0         | 0         | 0         | 13        | 0         | 0         | 0         | 0         | 0         | 0         | 0         | 0         | 0         | 0         |
| Clostridium                                            | 0         | 0         | 0         | 6         | 0         | 0         | 0         | 0         | 0         | 0         | 0         | 0         | 0         | 0         | 0         | 0         | 0         | 0         | 0         | 0         |
| Corynebacteriales                                      | 0         | 0         | 0         | 0         | 0         | 0         | 0         | 0         | 0         | 0         | 0         | 0         | 0         | 0         | 0         | 0         | 0         | 0         | 0         | 0         |
| Corynebacterium                                        | 0         | 0         | 0         | 0         | 0         | 0         | 0         | 0         | 0         | 0         | 0         | 6         | 0         | 11        | 0         | 0         | 0         | 0         | 0         | 6         |
| Corynebacterium accolens/macginleyi                    | 0         | 0         | 0         | 0         | 0         | 0         | 0         | 0         | 0         | 0         | 0         | 0         | 0         | 40        | 0         | 0         | 0         | 0         | 0         | 0         |
| Corynebacterium appendicis                             | 0         | 0         | 0         | 0         | 0         | 0         | 0         | 0         | 0         | 0         | 0         | 0         | 0         | 6         | 0         | 0         | 0         | 0         | 0         | 0         |
| Corynebacterium aurimucosum/minutissimum/singulare     | 0         | 0         | 0         | 0         | 0         | 0         | 0         | 0         | 0         | 0         | 0         | 0         | 0         | 0         | 0         | 0         | 0         | 0         | 0         | 0         |
| Corynebacterium coyleae                                | 0         | 0         | 0         | 0         | 0         | 0         | 0         | 0         | 0         | 0         | 0         | 0         | 0         | 0         | 0         | 0         | 0         | 0         | 0         | 0         |
| Corynebacterium furnierii/mucifaciens/ureicelerivorans | 0         | 0         | 0         | 0         | 0         | 0         | 0         | 0         | 0         | 8         | 0         | 0         | 0         | 0         | 0         | 0         | 0         | 0         | 0         | 0         |
| Corynebacterium hadale/imitans                         | 0         | 0         | 0         | 0         | 0         | 0         | 0         | 0         | 0         | 0         | 0         | 0         | 0         | 0         | 0         | 0         | 0         | 0         | 0         | 11        |
| Corynebacterium pollutisoli                            | 0         | 0         | 0         | 5         | 0         | 0         | 0         | 0         | 0         | 0         | 0         | 0         | 0         | 21        | 0         | 0         | 0         | 0         | 0         | 0         |
| Corynebacterium propinquum/pseudodiphtheriticum        | 0         | 0         | 0         | 0         | 0         | 0         | 0         | 0         | 0         | 0         | 0         | 0         | 0         | 0         | 0         | 0         | 0         | 0         | 0         | 0         |
| Corynebacterium pseudogenitalium/tuberculoostearicum   | 0         | 0         | 0         | 0         | 0         | 0         | 0         | 0         | 0         | 0         | 0         | 0         | 0         | 21        | 0         | 19        | 0         | 0         | 0         | 0         |
| Craurococcus roseus                                    | 0         | 0         | 0         | 0         | 0         | 0         | 0         | 0         | 0         | 0         | 0         | 0         | 0         | 0         | 0         | 0         | 0         | 0         | 0         | 0         |
| Curvibacter                                            | 0         | 12        | 0         | 0         | 0         | 0         | 0         | 0         | 0         | 0         | 0         | 0         | 0         | 0         | 18        | 0         | 0         | 0         | 0         | 0         |



## Buffer\_21 - Buffer\_40

| Species                                                               | buffer_21 | buffer_22 | buffer_23 | buffer_24 | buffer_25 | buffer_26 | buffer_27 | buffer_28 | buffer_29 | buffer_30 | buffer_31 | buffer_32 | buffer_33 | buffer_34 | buffer_35 | buffer_36 | buffer_37 | buffer_38 | buffer_39 | buffer_40 |
|-----------------------------------------------------------------------|-----------|-----------|-----------|-----------|-----------|-----------|-----------|-----------|-----------|-----------|-----------|-----------|-----------|-----------|-----------|-----------|-----------|-----------|-----------|-----------|
| Noviherbaspirillum                                                    | 0         | 0         | 0         | 0         | 0         | 0         | 0         | 0         | 0         | 0         | 0         | 0         | 0         | 0         | 0         | 0         | 0         | 0         | 0         | 0         |
| Novosphingobium pentaromativorans/resinovorum                         | 0         | 0         | 0         | 0         | 0         | 0         | 0         | 0         | 0         | 0         | 0         | 0         | 0         | 0         | 0         | 0         | 0         | 0         | 0         | 0         |
| Paenibacillus                                                         | 0         | 0         | 0         | 0         | 0         | 0         | 0         | 0         | 0         | 0         | 0         | 0         | 0         | 0         | 0         | 0         | 0         | 0         | 0         | 0         |
| Pantoea agglomerans/dispersa                                          | 0         | 0         | 0         | 0         | 0         | 0         | 0         | 0         | 0         | 0         | 0         | 0         | 0         | 0         | 0         | 0         | 0         | 0         | 0         | 0         |
| Pantoea stewartii                                                     | 0         | 0         | 0         | 0         | 0         | 0         | 0         | 0         | 0         | 0         | 0         | 0         | 0         | 0         | 0         | 0         | 0         | 0         | 0         | 15        |
| Paracoccus                                                            | 0         | 0         | 0         | 0         | 0         | 0         | 0         | 0         | 0         | 10        | 0         | 0         | 0         | 0         | 0         | 12        | 0         | 0         | 0         | 0         |
| Peptoniphilus asaccharolyticus/grossensis/harei/phoceensis/rhinitidis | 0         | 0         | 0         | 0         | 0         | 0         | 0         | 0         | 0         | 0         | 0         | 0         | 0         | 0         | 0         | 0         | 0         | 0         | 0         | 0         |
| Phycoccus                                                             | 0         | 0         | 0         | 0         | 0         | 3         | 0         | 0         | 0         | 0         | 0         | 0         | 0         | 0         | 0         | 0         | 0         | 0         | 0         | 0         |
| Pontibacter                                                           | 0         | 0         | 0         | 0         | 0         | 0         | 0         | 0         | 0         | 0         | 0         | 0         | 0         | 0         | 0         | 0         | 0         | 0         | 0         | 0         |
| Porphyromonas                                                         | 0         | 2         | 0         | 0         | 0         | 0         | 0         | 0         | 0         | 0         | 0         | 0         | 0         | 0         | 0         | 0         | 0         | 0         | 0         | 0         |
| Prevotella                                                            | 0         | 0         | 0         | 0         | 0         | 9         | 0         | 0         | 10        | 0         | 0         | 0         | 0         | 0         | 0         | 0         | 0         | 0         | 0         | 0         |
| Prevotella amnii                                                      | 0         | 0         | 0         | 0         | 0         | 0         | 0         | 0         | 0         | 0         | 0         | 0         | 0         | 0         | 0         | 0         | 0         | 0         | 0         | 0         |
| Prevotella disiens                                                    | 0         | 0         | 0         | 0         | 0         | 0         | 0         | 0         | 0         | 0         | 0         | 0         | 0         | 0         | 0         | 0         | 0         | 0         | 0         | 0         |
| Prevotella melaninogenica                                             | 24        | 0         | 0         | 0         | 0         | 0         | 0         | 0         | 0         | 0         | 0         | 0         | 0         | 0         | 0         | 0         | 0         | 0         | 0         | 0         |
| Prevotella timonensis                                                 | 0         | 0         | 0         | 4         | 0         | 0         | 0         | 0         | 0         | 0         | 0         | 0         | 0         | 0         | 0         | 0         | 0         | 0         | 0         | 0         |
| Pseudoclavibacter                                                     | 0         | 0         | 0         | 0         | 0         | 0         | 0         | 0         | 0         | 7         | 0         | 0         | 0         | 0         | 0         | 0         | 0         | 0         | 0         | 0         |
| Pseudomonas antarctica/fluorescens                                    | 0         | 0         | 0         | 0         | 0         | 0         | 0         | 0         | 0         | 0         | 0         | 0         | 0         | 0         | 0         | 0         | 0         | 0         | 0         | 0         |
| Pseudomonas baetica                                                   | 0         | 0         | 0         | 0         | 0         | 0         | 0         | 0         | 0         | 0         | 0         | 0         | 0         | 0         | 0         | 0         | 0         | 0         | 0         | 1         |
| Pseudomonas fluorescens/koreensis                                     | 0         | 0         | 0         | 0         | 0         | 0         | 0         | 0         | 0         | 0         | 0         | 0         | 0         | 0         | 0         | 0         | 0         | 0         | 0         | 0         |
| Pseudomonas gessardii                                                 | 0         | 0         | 0         | 0         | 0         | 0         | 0         | 0         | 0         | 0         | 0         | 0         | 0         | 0         | 0         | 0         | 0         | 0         | 0         | 0         |
| Pseudomonas monteilii                                                 | 0         | 0         | 0         | 0         | 0         | 0         | 0         | 0         | 0         | 0         | 0         | 0         | 0         | 0         | 0         | 0         | 0         | 0         | 0         | 0         |
| Pseudomonas oleovorans/pseudoalcaligenes group                        | 0         | 7         | 0         | 0         | 0         | 0         | 0         | 0         | 0         | 0         | 0         | 0         | 0         | 0         | 0         | 0         | 0         | 0         | 0         | 0         |
| Pseudomonas resinovorans                                              | 0         | 0         | 0         | 0         | 0         | 0         | 0         | 0         | 0         | 0         | 0         | 0         | 0         | 0         | 0         | 12        | 0         | 0         | 0         | 0         |
| Pseudomonas stutzeri group                                            | 0         | 0         | 0         | 0         | 0         | 0         | 0         | 0         | 0         | 0         | 0         | 0         | 0         | 0         | 0         | 0         | 0         | 0         | 0         | 0         |
| Pseudomonas stutzeri subgroup                                         | 0         | 0         | 0         | 0         | 0         | 0         | 0         | 0         | 0         | 0         | 0         | 0         | 0         | 0         | 0         | 0         | 0         | 0         | 0         | 22        |
| Pseudomonas veronii                                                   | 0         | 0         | 0         | 0         | 0         | 0         | 0         | 0         | 0         | 0         | 0         | 0         | 0         | 0         | 0         | 0         | 0         | 0         | 0         | 0         |
| Pseudoxanthomonas indica                                              | 0         | 12        | 0         | 0         | 0         | 0         | 0         | 0         | 0         | 0         | 0         | 0         | 0         | 0         | 0         | 0         | 0         | 0         | 0         | 0         |
| Pseudoxanthomonas mexicana                                            | 0         | 6         | 0         | 0         | 0         | 0         | 0         | 0         | 0         | 0         | 0         | 0         | 0         | 0         | 0         | 0         | 0         | 0         | 0         | 0         |
| Psychrobacter alimentarius                                            | 0         | 0         | 0         | 0         | 0         | 0         | 0         | 0         | 0         | 0         | 0         | 0         | 0         | 0         | 0         | 0         | 0         | 0         | 0         | 0         |
| Rheinheimera                                                          | 0         | 0         | 0         | 0         | 0         | 0         | 0         | 0         | 0         | 0         | 0         | 0         | 0         | 18        | 0         | 0         | 0         | 0         | 0         | 0         |
| Rheinheimera perlucida                                                | 0         | 6         | 0         | 0         | 0         | 0         | 0         | 0         | 0         | 0         | 0         | 0         | 0         | 20        | 0         | 0         | 0         | 0         | 0         | 0         |
| Rhodobacter                                                           | 0         | 7         | 0         | 0         | 0         | 0         | 0         | 0         | 0         | 0         | 0         | 0         | 0         | 0         | 0         | 0         | 0         | 0         | 0         | 0         |
| Rhodobacteraceae                                                      | 0         | 0         | 0         | 0         | 0         | 0         | 0         | 0         | 0         | 0         | 0         | 0         | 0         | 0         | 0         | 0         | 0         | 0         | 0         | 0         |
| Rhodococcus corynebacterioides/kroppenstedtii                         | 0         | 0         | 0         | 0         | 0         | 0         | 0         | 0         | 0         | 0         | 0         | 0         | 0         | 0         | 0         | 0         | 0         | 0         | 0         | 0         |
| Romboutsia timonensis                                                 | 0         | 0         | 0         | 0         | 0         | 0         | 0         | 0         | 0         | 0         | 0         | 0         | 0         | 9         | 0         | 0         | 0         | 0         | 0         | 0         |
| Rothia                                                                | 0         | 0         | 0         | 7         | 0         | 15        | 0         | 0         | 0         | 0         | 0         | 0         | 0         | 0         | 0         | 0         | 0         | 0         | 0         | 0         |
| Rothia amarae                                                         | 0         | 0         | 0         | 0         | 0         | 0         | 0         | 0         | 0         | 0         | 0         | 0         | 0         | 15        | 15        | 0         | 0         | 0         | 0         | 0         |
| Saccharopolyspora                                                     | 0         | 0         | 0         | 0         | 0         | 0         | 0         | 0         | 0         | 0         | 0         | 0         | 0         | 0         | 0         | 0         | 0         | 0         | 0         | 4         |
| Shigella/Escherichia                                                  | 0         | 0         | 0         | 0         | 0         | 0         | 0         | 0         | 0         | 22        | 71        | 44        | 28        | 52        | 0         | 27        | 0         | 0         | 0         | 0         |
| Sneathia                                                              | 0         | 0         | 0         | 0         | 0         | 0         | 0         | 0         | 0         | 0         | 0         | 0         | 0         | 0         | 0         | 0         | 0         | 0         | 0         | 0         |
| Sneathia amnii                                                        | 0         | 0         | 0         | 0         | 0         | 0         | 0         | 0         | 0         | 0         | 0         | 0         | 0         | 0         | 0         | 0         | 0         | 0         | 0         | 0         |
| Sneathia sanguinigena                                                 | 0         | 0         | 0         | 0         | 0         | 0         | 0         | 0         | 0         | 0         | 0         | 0         | 0         | 0         | 0         | 0         | 0         | 0         | 0         | 0         |
| Sphingobium yanoikuyae                                                | 0         | 0         | 0         | 0         | 0         | 0         | 0         | 0         | 0         | 0         | 0         | 0         | 0         | 0         | 0         | 0         | 0         | 0         | 0         | 0         |
| Sphingomonas kaistensis                                               | 0         | 0         | 0         | 0         | 0         | 0         | 0         | 0         | 0         | 0         | 0         | 0         | 0         | 0         | 0         | 0         | 0         | 0         | 0         | 0         |
| Sphingomonas starnbergensis                                           | 0         | 0         | 0         | 0         | 0         | 0         | 0         | 0         | 0         | 0         | 0         | 0         | 0         | 0         | 0         | 0         | 0         | 0         | 0         | 0         |
| Staphylococcus aureus                                                 | 0         | 0         | 0         | 0         | 0         | 0         | 0         | 0         | 0         | 0         | 0         | 0         | 0         | 0         | 0         | 0         | 0         | 0         | 0         | 0         |
| Staphylococcus capitis/caprae                                         | 0         | 0         | 0         | 0         | 0         | 0         | 0         | 0         | 0         | 0         | 0         | 0         | 0         | 0         | 0         | 0         | 0         | 0         | 0         | 0         |
| Staphylococcus caprae/cohnii/epidermidis                              | 0         | 0         | 0         | 0         | 0         | 8         | 0         | 6         | 15        | 18        | 56        | 0         | 0         | 0         | 22        | 0         | 0         | 0         | 0         | 0         |
| Staphylococcus cohnii/saprophyticus                                   | 0         | 0         | 0         | 0         | 0         | 0         | 0         | 0         | 0         | 0         | 0         | 0         | 0         | 0         | 0         | 12        | 0         | 0         | 0         | 0         |
| Staphylococcus epidermidis/hominis                                    | 0         | 0         | 0         | 0         | 0         | 0         | 0         | 0         | 0         | 0         | 0         | 0         | 0         | 0         | 0         | 0         | 0         | 0         | 0         | 0         |
| Staphylococcus equorum/saprophyticus/xylosus                          | 0         | 0         | 0         | 0         | 0         | 0         | 0         | 0         | 0         | 18        | 0         | 0         | 0         | 0         | 0         | 0         | 0         | 0         | 0         | 0         |
| Staphylococcus haemolyticus                                           | 0         | 0         | 0         | 0         | 0         | 0         | 0         | 0         | 0         | 0         | 0         | 0         | 0         | 0         | 0         | 0         | 0         | 0         | 0         | 0         |
| Streptococcus                                                         | 0         | 0         | 0         | 0         | 0         | 0         | 0         | 0         | 0         | 0         | 0         | 0         | 0         | 0         | 0         | 0         | 0         | 0         | 0         | 0         |
| Streptococcus agalactiae                                              | 0         | 0         | 0         | 0         | 0         | 0         | 0         | 0         | 0         | 3         | 0         | 0         | 0         | 0         | 0         | 0         | 0         | 0         | 0         | 0         |
| Streptococcus anginosus                                               | 0         | 0         | 0         | 0         | 0         | 0         | 0         | 0         | 0         | 0         | 0         | 0         | 0         | 0         | 0         | 0         | 0         | 0         | 0         | 0         |
| Streptococcus mitis group                                             | 30        | 0         | 42        | 0         | 35        | 17        | 25        | 0         | 44        | 89        | 27        | 0         | 24        | 10        | 13        | 10        | 32        | 15        | 16        | 12        |
| Thiopsisdomonas                                                       | 0         | 0         | 0         | 0         | 0         | 0         | 0         | 0         | 0         | 0         | 0         | 0         | 0         | 0         | 0         | 11        | 0         | 0         | 0         | 0         |
| Turicella otitidis                                                    | 0         | 0         | 0         | 0         | 0         | 0         | 0         | 0         | 0         | 0         | 0         | 0         | 0         | 9         | 8         | 0         | 0         | 0         | 0         | 0         |
| unclassified Clostridiales                                            | 0         | 0         | 0         | 0         | 0         | 0         | 0         | 0         | 0         | 0         | 0         | 0         | 0         | 8         | 0         | 0         | 0         | 0         | 0         | 0         |
| Undibacterium                                                         | 0         | 0         | 0         | 0         | 0         | 0         | 0         | 0         | 0         | 0         | 0         | 0         | 0         | 0         | 0         | 0         | 0         | 0         | 0         | 0         |
| Variovorax gossypii                                                   | 0         | 0         | 5         | 0         | 0         | 0         | 0         | 0         | 0         | 0         | 0         | 0         | 0         | 0         | 0         | 0         | 0         | 0         | 0         | 0         |
| Veillonella                                                           | 0         | 0         | 0         | 0         | 0         | 0         | 0         | 0         | 0         | 0         | 0         | 0         | 0         | 0         | 0         | 0         | 0         | 0         | 0         | 0         |
| Veillonella dispar/parvula                                            | 0         | 0         | 0         | 0         | 0         | 0         | 0         | 0         | 0         | 0         | 0         | 0         | 0         | 0         | 0         | 8         | 0         | 0         | 0         | 0         |
| Veillonella montpellierensis                                          | 0         | 0         | 0         | 0         | 0         | 0         | 0         | 0         | 0         | 0         | 0         | 0         | 0         | 0         | 0         | 0         | 0         | 0         | 0         | 0         |
| Williamsia faeni/muralis                                              | 0         | 0         | 0         | 0         | 0         | 0         | 0         | 0         | 0         | 0         | 0         | 0         | 0         | 0         | 0         | 0         | 0         | 0         | 0         | 0         |
| Zoogloea resiniphila                                                  | 0         | 0         | 0         | 0         | 0         | 0         | 0         | 0         | 0         | 0         | 0         | 0         | 0         | 0         | 0         | 0         | 0         | 0         | 0         | 0         |

# Buffer\_41 - Buffer\_58

| Species                                                | buffer_41 | buffer_42 | buffer_43 | buffer_44 | buffer_45 | buffer_46 | buffer_47 | buffer_48 | buffer_49 | buffer_50 | buffer_51 | buffer_52 | buffer_53 | buffer_54 | buffer_55 | buffer_56 | buffer_57 | buffer_58 |
|--------------------------------------------------------|-----------|-----------|-----------|-----------|-----------|-----------|-----------|-----------|-----------|-----------|-----------|-----------|-----------|-----------|-----------|-----------|-----------|-----------|
| [Clostridium] hiranonis                                | 0         | 0         | 0         | 0         | 0         | 0         | 0         | 0         | 0         | 0         | 0         | 0         | 0         | 0         | 0         | 0         | 0         | 0         |
| Acidovorax/Undibacterium                               | 0         | 0         | 0         | 0         | 0         | 0         | 0         | 0         | 0         | 0         | 0         | 0         | 0         | 0         | 0         | 0         | 0         | 0         |
| Acinetobacter haemolyticus/johnsonii                   | 0         | 0         | 0         | 0         | 0         | 0         | 0         | 0         | 0         | 0         | 0         | 0         | 0         | 0         | 0         | 0         | 0         | 0         |
| Acinetobacter haemolyticus/schindleri                  | 0         | 0         | 0         | 0         | 0         | 0         | 0         | 0         | 0         | 0         | 0         | 0         | 0         | 0         | 0         | 0         | 0         | 0         |
| Acinetobacter parvus                                   | 0         | 0         | 0         | 0         | 0         | 0         | 0         | 0         | 0         | 0         | 0         | 25        | 0         | 0         | 0         | 0         | 0         | 0         |
| Acinetobacter proteolyticus                            | 0         | 0         | 0         | 0         | 0         | 0         | 0         | 0         | 0         | 0         | 0         | 80        | 0         | 0         | 0         | 0         | 0         | 0         |
| Acinetobacter schindleri                               | 0         | 0         | 0         | 0         | 0         | 0         | 0         | 0         | 0         | 0         | 0         | 0         | 0         | 0         | 0         | 0         | 0         | 0         |
| Actinomyces oris/viscosus                              | 0         | 0         | 0         | 0         | 0         | 0         | 0         | 0         | 0         | 0         | 0         | 0         | 0         | 0         | 0         | 0         | 0         | 0         |
| Aerococcus urinaeequi/viridans                         | 0         | 0         | 0         | 0         | 0         | 0         | 0         | 0         | 0         | 0         | 0         | 0         | 0         | 0         | 0         | 0         | 0         | 0         |
| Aeromonas caviae                                       | 0         | 0         | 0         | 0         | 0         | 0         | 0         | 0         | 0         | 0         | 0         | 0         | 0         | 0         | 0         | 0         | 0         | 0         |
| Aeromonas veronii                                      | 0         | 0         | 0         | 0         | 0         | 0         | 0         | 0         | 0         | 0         | 0         | 0         | 0         | 0         | 0         | 0         | 0         | 0         |
| Afipia                                                 | 0         | 0         | 0         | 0         | 0         | 0         | 0         | 0         | 0         | 0         | 0         | 0         | 0         | 0         | 0         | 0         | 0         | 0         |
| Aggregatibacter aphrophilus                            | 0         | 0         | 0         | 0         | 0         | 0         | 0         | 0         | 0         | 0         | 0         | 0         | 0         | 0         | 0         | 0         | 0         | 0         |
| Alishewanella                                          | 0         | 0         | 0         | 0         | 0         | 0         | 0         | 0         | 0         | 0         | 0         | 0         | 0         | 0         | 0         | 0         | 0         | 0         |
| Alloiooccus                                            | 0         | 5         | 0         | 0         | 0         | 0         | 0         | 0         | 0         | 0         | 0         | 0         | 0         | 0         | 0         | 0         | 0         | 0         |
| Altererythrobacter epoxidivorans                       | 0         | 0         | 0         | 0         | 0         | 0         | 0         | 0         | 0         | 0         | 0         | 0         | 0         | 0         | 0         | 0         | 0         | 0         |
| Anaerococcus                                           | 0         | 0         | 0         | 0         | 0         | 4         | 0         | 0         | 0         | 0         | 0         | 0         | 0         | 52        | 0         | 0         | 0         | 0         |
| Anaerococcus lactolyticus                              | 0         | 0         | 0         | 0         | 0         | 0         | 0         | 0         | 0         | 0         | 0         | 0         | 0         | 0         | 0         | 0         | 0         | 0         |
| Anaerococcus octavius                                  | 0         | 0         | 0         | 0         | 0         | 0         | 0         | 0         | 0         | 0         | 0         | 0         | 0         | 0         | 0         | 0         | 0         | 0         |
| Anaerococcus prevotii/tetradius                        | 0         | 0         | 0         | 0         | 0         | 0         | 0         | 0         | 0         | 0         | 0         | 0         | 0         | 0         | 0         | 0         | 0         | 0         |
| Anaeromyxobacter                                       | 0         | 0         | 0         | 0         | 0         | 0         | 0         | 0         | 0         | 0         | 0         | 0         | 0         | 0         | 0         | 0         | 0         | 0         |
| Arenimonas                                             | 0         | 0         | 0         | 0         | 0         | 0         | 0         | 0         | 0         | 0         | 0         | 0         | 0         | 0         | 0         | 0         | 0         | 0         |
| Atopobium vaginae                                      | 0         | 0         | 0         | 0         | 0         | 0         | 0         | 0         | 0         | 0         | 0         | 0         | 0         | 0         | 0         | 0         | 0         | 0         |
| Bacillaceae                                            | 0         | 0         | 0         | 0         | 0         | 0         | 0         | 0         | 0         | 0         | 0         | 0         | 0         | 0         | 0         | 0         | 0         | 0         |
| Bacillus dakarensis                                    | 0         | 0         | 0         | 0         | 0         | 0         | 0         | 0         | 0         | 0         | 0         | 0         | 0         | 0         | 0         | 0         | 0         | 0         |
| Bacillus foraminis                                     | 0         | 0         | 0         | 0         | 0         | 0         | 0         | 0         | 0         | 0         | 0         | 0         | 0         | 0         | 0         | 0         | 0         | 0         |
| Bacillus idriensis                                     | 0         | 0         | 0         | 0         | 0         | 0         | 0         | 0         | 0         | 24        | 0         | 0         | 0         | 0         | 0         | 0         | 0         | 0         |
| Bacillus malikii                                       | 0         | 0         | 0         | 0         | 0         | 0         | 0         | 0         | 0         | 0         | 0         | 0         | 0         | 0         | 0         | 0         | 0         | 0         |
| Bacteroidales                                          | 0         | 0         | 0         | 0         | 0         | 0         | 0         | 0         | 0         | 0         | 0         | 0         | 0         | 0         | 0         | 0         | 0         | 0         |
| Bergeyella                                             | 0         | 0         | 0         | 0         | 0         | 0         | 9         | 0         | 0         | 0         | 0         | 0         | 0         | 0         | 0         | 0         | 0         | 0         |
| Betaproteobacteria                                     | 0         | 0         | 0         | 0         | 0         | 0         | 0         | 0         | 0         | 0         | 0         | 0         | 0         | 0         | 0         | 0         | 0         | 0         |
| Blastococcus endophyticus                              | 0         | 0         | 0         | 0         | 0         | 0         | 0         | 0         | 0         | 0         | 0         | 0         | 0         | 0         | 0         | 0         | 0         | 0         |
| Brevibacterium                                         | 0         | 0         | 0         | 0         | 0         | 0         | 0         | 0         | 0         | 0         | 0         | 0         | 0         | 0         | 0         | 0         | 0         | 0         |
| Brevibacterium casei                                   | 0         | 0         | 0         | 0         | 0         | 0         | 0         | 0         | 0         | 0         | 0         | 0         | 0         | 0         | 0         | 0         | 0         | 0         |
| Brevibacterium ihuae                                   | 0         | 0         | 0         | 0         | 0         | 0         | 0         | 0         | 0         | 0         | 0         | 0         | 0         | 0         | 0         | 0         | 0         | 0         |
| Brevundimonas                                          | 0         | 0         | 0         | 0         | 0         | 0         | 0         | 0         | 0         | 0         | 0         | 0         | 0         | 0         | 0         | 0         | 0         | 0         |
| Brevundimonas vesicularis                              | 0         | 0         | 0         | 0         | 0         | 0         | 0         | 0         | 0         | 0         | 0         | 0         | 0         | 0         | 0         | 0         | 0         | 0         |
| Brevundimonas/Caulobacter                              | 0         | 0         | 0         | 0         | 0         | 0         | 0         | 0         | 0         | 0         | 0         | 0         | 0         | 0         | 0         | 0         | 0         | 0         |
| Burkholderia pyrrocinia/stabilis                       | 0         | 0         | 0         | 0         | 0         | 0         | 0         | 0         | 0         | 0         | 0         | 0         | 0         | 0         | 0         | 0         | 0         | 0         |
| Burkholderiales Genera incertae sedis                  | 0         | 0         | 0         | 0         | 0         | 0         | 0         | 0         | 0         | 0         | 0         | 0         | 0         | 0         | 0         | 0         | 0         | 0         |
| Campylobacter rectus/showae                            | 0         | 0         | 0         | 0         | 0         | 0         | 0         | 0         | 0         | 0         | 0         | 0         | 0         | 0         | 0         | 0         | 0         | 0         |
| Candidatus Saccharibacteria                            | 0         | 0         | 0         | 0         | 0         | 0         | 0         | 0         | 0         | 0         | 0         | 0         | 0         | 0         | 0         | 0         | 0         | 0         |
| Candidatus Saccharimonas                               | 0         | 0         | 0         | 0         | 0         | 0         | 0         | 0         | 0         | 0         | 0         | 0         | 0         | 0         | 0         | 0         | 0         | 0         |
| Capnocytophaga                                         | 0         | 0         | 0         | 0         | 0         | 0         | 0         | 0         | 0         | 0         | 0         | 0         | 2         | 0         | 0         | 0         | 0         | 0         |
| Cardiobacterium hominis                                | 0         | 0         | 0         | 0         | 0         | 0         | 0         | 0         | 0         | 0         | 0         | 0         | 0         | 0         | 0         | 0         | 0         | 0         |
| Carnobacteriaceae                                      | 0         | 0         | 0         | 0         | 0         | 0         | 0         | 0         | 0         | 0         | 0         | 0         | 0         | 0         | 0         | 0         | 0         | 0         |
| Carnobacterium inhibens/jeotgali                       | 0         | 0         | 0         | 0         | 0         | 0         | 0         | 0         | 0         | 0         | 0         | 0         | 0         | 0         | 0         | 0         | 0         | 0         |
| Casaltella massiliensis                                | 0         | 0         | 0         | 0         | 0         | 0         | 0         | 0         | 0         | 0         | 0         | 0         | 0         | 0         | 0         | 0         | 0         | 0         |
| Chelatococcus asaccharovorans                          | 0         | 0         | 0         | 0         | 0         | 0         | 0         | 0         | 0         | 0         | 0         | 0         | 0         | 0         | 0         | 0         | 0         | 0         |
| Chelatococcus/Methylobacterium                         | 0         | 0         | 0         | 0         | 0         | 0         | 0         | 0         | 0         | 0         | 0         | 0         | 0         | 0         | 0         | 0         | 0         | 0         |
| Chryseobacterium                                       | 0         | 0         | 0         | 0         | 0         | 0         | 0         | 0         | 0         | 0         | 0         | 0         | 0         | 0         | 0         | 0         | 0         | 0         |
| Chryseobacterium hominis                               | 0         | 0         | 0         | 0         | 0         | 0         | 9         | 0         | 0         | 0         | 0         | 0         | 0         | 0         | 0         | 0         | 0         | 0         |
| Chryseomicrobium amylolyticum                          | 0         | 0         | 0         | 0         | 0         | 0         | 0         | 0         | 0         | 0         | 0         | 0         | 0         | 0         | 0         | 0         | 0         | 0         |
| Cloacibacterium normanense                             | 0         | 0         | 0         | 0         | 0         | 0         | 0         | 17        | 0         | 0         | 0         | 0         | 0         | 0         | 0         | 0         | 0         | 0         |
| Clostridium                                            | 0         | 0         | 0         | 0         | 0         | 0         | 0         | 0         | 0         | 0         | 0         | 0         | 0         | 0         | 0         | 0         | 0         | 0         |
| Corynebacteriales                                      | 0         | 0         | 0         | 0         | 0         | 0         | 0         | 0         | 0         | 0         | 0         | 5         | 0         | 0         | 0         | 0         | 0         | 0         |
| Corynebacterium                                        | 0         | 0         | 0         | 0         | 0         | 0         | 0         | 0         | 0         | 0         | 0         | 0         | 0         | 0         | 14        | 0         | 0         | 0         |
| Corynebacterium accolens/macginleyi                    | 0         | 0         | 0         | 0         | 0         | 0         | 0         | 0         | 0         | 0         | 0         | 0         | 0         | 0         | 0         | 0         | 0         | 0         |
| Corynebacterium appendicis                             | 0         | 0         | 0         | 0         | 0         | 0         | 0         | 0         | 0         | 0         | 0         | 0         | 0         | 0         | 0         | 0         | 0         | 0         |
| Corynebacterium aurimucosum/minutissimum/singulare     | 0         | 0         | 0         | 0         | 0         | 0         | 0         | 0         | 0         | 0         | 0         | 0         | 42        | 0         | 0         | 0         | 0         | 0         |
| Corynebacterium coyleae                                | 0         | 0         | 0         | 0         | 0         | 0         | 0         | 0         | 0         | 0         | 0         | 0         | 0         | 0         | 0         | 0         | 0         | 0         |
| Corynebacterium furnierii/mucifaciens/ureicelerivorans | 0         | 0         | 0         | 0         | 0         | 0         | 0         | 0         | 0         | 0         | 0         | 71        | 0         | 0         | 0         | 0         | 0         | 0         |
| Corynebacterium hadale/imitans                         | 0         | 0         | 0         | 0         | 0         | 0         | 0         | 0         | 0         | 0         | 0         | 0         | 0         | 0         | 0         | 0         | 0         | 0         |
| Corynebacterium pollutisoli                            | 0         | 0         | 0         | 0         | 0         | 0         | 0         | 0         | 0         | 0         | 0         | 0         | 0         | 0         | 0         | 0         | 0         | 0         |
| Corynebacterium propinquum/pseudodiphtheriticum        | 0         | 0         | 0         | 0         | 0         | 0         | 0         | 0         | 0         | 0         | 0         | 0         | 0         | 0         | 0         | 0         | 0         | 0         |
| Corynebacterium pseudogenitalium/tuberculoostearicum   | 0         | 0         | 0         | 0         | 0         | 0         | 14        | 3         | 0         | 0         | 0         | 0         | 0         | 0         | 0         | 0         | 0         | 0         |
| Craurococcus roseus                                    | 0         | 0         | 0         | 0         | 0         | 0         | 0         | 0         | 0         | 0         | 0         | 0         | 0         | 0         | 0         | 0         | 0         | 0         |
| Curvibacter                                            | 0         | 0         | 0         | 0         | 0         | 0         | 43        | 0         | 0         | 0         | 0         | 222       | 0         | 0         | 0         | 0         | 0         | 0         |



# Buffer\_41 - Buffer\_58

| Species                                                               | buffer_41 | buffer_42 | buffer_43 | buffer_44 | buffer_45 | buffer_46 | buffer_47 | buffer_48 | buffer_49 | buffer_50 | buffer_51 | buffer_52 | buffer_53 | buffer_54 | buffer_55 | buffer_56 | buffer_57 | buffer_58 |
|-----------------------------------------------------------------------|-----------|-----------|-----------|-----------|-----------|-----------|-----------|-----------|-----------|-----------|-----------|-----------|-----------|-----------|-----------|-----------|-----------|-----------|
| Noviherbaspirillum                                                    | 0         | 0         | 0         | 0         | 0         | 0         | 0         | 0         | 0         | 0         | 0         | 0         | 0         | 0         | 0         | 0         | 0         | 0         |
| Novosphingobium pentaromativorans/resinovorum                         | 0         | 0         | 0         | 0         | 0         | 0         | 0         | 0         | 0         | 0         | 0         | 0         | 0         | 0         | 0         | 0         | 0         | 0         |
| Paenibacillus                                                         | 0         | 0         | 0         | 0         | 6         | 0         | 0         | 0         | 18        | 0         | 0         | 0         | 0         | 0         | 0         | 0         | 0         | 0         |
| Pantoea agglomerans/dispersa                                          | 0         | 0         | 0         | 0         | 0         | 0         | 0         | 0         | 0         | 0         | 0         | 0         | 0         | 0         | 0         | 0         | 0         | 0         |
| Pantoea stewartii                                                     | 0         | 0         | 0         | 0         | 0         | 0         | 0         | 0         | 0         | 0         | 0         | 0         | 0         | 0         | 0         | 0         | 0         | 0         |
| Paracoccus                                                            | 0         | 0         | 0         | 0         | 0         | 3         | 24        | 0         | 0         | 0         | 0         | 59        | 0         | 0         | 0         | 0         | 0         | 0         |
| Peptoniphilus asaccharolyticus/grossensis/harei/phoceensis/rhinitidis | 0         | 0         | 0         | 0         | 0         | 0         | 0         | 0         | 0         | 0         | 0         | 0         | 0         | 0         | 0         | 0         | 0         | 0         |
| Phycoccus                                                             | 0         | 0         | 0         | 0         | 0         | 0         | 0         | 0         | 0         | 0         | 0         | 0         | 0         | 0         | 0         | 0         | 0         | 0         |
| Pontibacter                                                           | 0         | 0         | 0         | 0         | 0         | 0         | 0         | 0         | 0         | 0         | 0         | 0         | 0         | 0         | 0         | 0         | 0         | 0         |
| Porphyromonas                                                         | 0         | 6         | 0         | 0         | 0         | 0         | 0         | 0         | 0         | 0         | 0         | 0         | 0         | 0         | 0         | 0         | 0         | 0         |
| Prevotella                                                            | 0         | 0         | 0         | 0         | 0         | 0         | 0         | 0         | 0         | 0         | 0         | 0         | 0         | 0         | 0         | 0         | 0         | 0         |
| Prevotella amnii                                                      | 0         | 0         | 0         | 0         | 0         | 0         | 0         | 0         | 0         | 0         | 0         | 0         | 0         | 0         | 0         | 0         | 0         | 0         |
| Prevotella disiens                                                    | 0         | 0         | 0         | 0         | 0         | 0         | 0         | 0         | 0         | 0         | 0         | 0         | 0         | 0         | 0         | 0         | 0         | 0         |
| Prevotella melaninogenica                                             | 0         | 0         | 0         | 0         | 0         | 0         | 0         | 0         | 0         | 0         | 0         | 0         | 0         | 0         | 0         | 0         | 0         | 0         |
| Prevotella timonensis                                                 | 0         | 0         | 0         | 0         | 0         | 0         | 0         | 0         | 0         | 0         | 0         | 0         | 0         | 0         | 0         | 0         | 0         | 0         |
| Pseudoclavibacter                                                     | 0         | 0         | 0         | 0         | 0         | 0         | 0         | 0         | 0         | 0         | 0         | 0         | 0         | 0         | 0         | 0         | 0         | 0         |
| Pseudomonas antarctica/fluorescens                                    | 0         | 0         | 0         | 0         | 0         | 0         | 0         | 0         | 0         | 0         | 0         | 0         | 0         | 0         | 0         | 0         | 0         | 0         |
| Pseudomonas baetica                                                   | 0         | 0         | 0         | 0         | 0         | 0         | 0         | 0         | 0         | 0         | 0         | 0         | 0         | 0         | 0         | 0         | 0         | 0         |
| Pseudomonas fluorescens/koreensis                                     | 0         | 0         | 0         | 0         | 0         | 0         | 0         | 0         | 0         | 0         | 0         | 16        | 0         | 0         | 0         | 0         | 0         | 0         |
| Pseudomonas gessardii                                                 | 0         | 0         | 0         | 0         | 0         | 0         | 0         | 0         | 0         | 0         | 0         | 0         | 0         | 0         | 0         | 0         | 0         | 0         |
| Pseudomonas monteilii                                                 | 0         | 0         | 0         | 0         | 0         | 0         | 0         | 0         | 0         | 0         | 0         | 0         | 0         | 0         | 0         | 0         | 0         | 0         |
| Pseudomonas oleovorans/pseudoalcaligenes group                        | 0         | 0         | 0         | 0         | 0         | 0         | 0         | 0         | 0         | 0         | 0         | 0         | 0         | 0         | 0         | 0         | 0         | 0         |
| Pseudomonas resinovorans                                              | 0         | 0         | 0         | 0         | 0         | 0         | 0         | 0         | 0         | 0         | 0         | 0         | 0         | 0         | 0         | 0         | 0         | 0         |
| Pseudomonas stutzeri group                                            | 0         | 0         | 0         | 0         | 0         | 0         | 0         | 0         | 0         | 0         | 0         | 0         | 0         | 0         | 0         | 0         | 0         | 0         |
| Pseudomonas stutzeri subgroup                                         | 0         | 0         | 0         | 0         | 0         | 0         | 0         | 0         | 0         | 0         | 0         | 0         | 0         | 0         | 0         | 0         | 0         | 0         |
| Pseudomonas veronii                                                   | 0         | 0         | 0         | 0         | 0         | 0         | 0         | 0         | 0         | 0         | 0         | 0         | 0         | 0         | 0         | 0         | 0         | 0         |
| Pseudoxanthomonas indica                                              | 0         | 0         | 0         | 0         | 0         | 0         | 0         | 0         | 0         | 0         | 0         | 0         | 0         | 0         | 0         | 0         | 0         | 0         |
| Pseudoxanthomonas mexicana                                            | 0         | 0         | 0         | 0         | 0         | 0         | 0         | 0         | 0         | 0         | 0         | 0         | 0         | 0         | 0         | 0         | 0         | 0         |
| Psychrobacter alimentarius                                            | 0         | 0         | 0         | 0         | 0         | 0         | 0         | 0         | 0         | 0         | 0         | 0         | 0         | 0         | 0         | 0         | 0         | 3         |
| Rheinheimera                                                          | 0         | 0         | 0         | 0         | 0         | 0         | 0         | 0         | 0         | 0         | 0         | 0         | 0         | 0         | 0         | 0         | 0         | 0         |
| Rheinheimera perlucida                                                | 0         | 0         | 0         | 0         | 0         | 0         | 0         | 0         | 0         | 0         | 0         | 0         | 0         | 0         | 0         | 0         | 0         | 0         |
| Rhodobacter                                                           | 0         | 0         | 0         | 0         | 0         | 0         | 0         | 0         | 0         | 0         | 0         | 0         | 0         | 0         | 0         | 0         | 0         | 0         |
| Rhodobacteraceae                                                      | 0         | 0         | 0         | 0         | 0         | 0         | 12        | 0         | 0         | 0         | 0         | 0         | 0         | 0         | 0         | 0         | 0         | 0         |
| Rhodococcus corynebacterioides/kroppenstedtii                         | 0         | 0         | 0         | 0         | 0         | 0         | 0         | 0         | 0         | 0         | 0         | 0         | 0         | 0         | 0         | 0         | 0         | 0         |
| Romboutsia timonensis                                                 | 0         | 0         | 0         | 0         | 0         | 0         | 0         | 0         | 0         | 0         | 0         | 0         | 0         | 0         | 0         | 0         | 0         | 0         |
| Rothia                                                                | 0         | 0         | 0         | 0         | 0         | 0         | 0         | 0         | 0         | 0         | 0         | 0         | 0         | 0         | 0         | 0         | 0         | 0         |
| Rothia amarae                                                         | 0         | 0         | 0         | 0         | 0         | 0         | 0         | 0         | 0         | 0         | 0         | 0         | 0         | 0         | 0         | 0         | 0         | 0         |
| Saccharopolyspora                                                     | 0         | 0         | 0         | 0         | 0         | 0         | 0         | 0         | 0         | 0         | 0         | 0         | 0         | 0         | 0         | 0         | 0         | 0         |
| Shigella/Escherichia                                                  | 16        | 0         | 0         | 0         | 0         | 0         | 0         | 18        | 0         | 13        | 0         | 0         | 0         | 0         | 0         | 0         | 0         | 0         |
| Sneathia                                                              | 0         | 0         | 0         | 0         | 0         | 0         | 0         | 0         | 0         | 0         | 0         | 0         | 0         | 0         | 0         | 0         | 0         | 0         |
| Sneathia amnii                                                        | 0         | 0         | 0         | 0         | 0         | 0         | 0         | 0         | 0         | 0         | 0         | 0         | 0         | 0         | 0         | 0         | 0         | 0         |
| Sneathia sanguinigena                                                 | 0         | 0         | 0         | 0         | 0         | 0         | 0         | 0         | 0         | 0         | 0         | 0         | 0         | 0         | 0         | 0         | 0         | 0         |
| Sphingobium yanoikuyae                                                | 0         | 0         | 0         | 0         | 0         | 0         | 0         | 0         | 0         | 0         | 0         | 0         | 0         | 0         | 0         | 0         | 0         | 0         |
| Sphingomonas kaistensis                                               | 0         | 0         | 0         | 0         | 0         | 0         | 0         | 0         | 0         | 0         | 0         | 0         | 0         | 0         | 0         | 0         | 0         | 0         |
| Sphingomonas starnbergensis                                           | 0         | 0         | 0         | 0         | 0         | 0         | 0         | 0         | 0         | 0         | 0         | 0         | 0         | 0         | 0         | 0         | 0         | 0         |
| Staphylococcus aureus                                                 | 0         | 0         | 0         | 0         | 0         | 0         | 0         | 0         | 0         | 0         | 0         | 0         | 0         | 0         | 0         | 0         | 0         | 0         |
| Staphylococcus capitis/caprae                                         | 0         | 0         | 0         | 0         | 0         | 0         | 0         | 0         | 0         | 0         | 0         | 0         | 0         | 77        | 0         | 0         | 0         | 0         |
| Staphylococcus caprae/cohnii/epidermidis                              | 0         | 9         | 0         | 0         | 0         | 6         | 101       | 0         | 0         | 0         | 0         | 94        | 0         | 71        | 19        | 0         | 0         | 0         |
| Staphylococcus cohnii/saprophyticus                                   | 0         | 0         | 0         | 0         | 0         | 0         | 0         | 0         | 0         | 0         | 0         | 0         | 0         | 0         | 0         | 0         | 0         | 0         |
| Staphylococcus epidermidis/hominis                                    | 0         | 0         | 0         | 0         | 0         | 0         | 54        | 0         | 0         | 0         | 0         | 14        | 0         | 0         | 0         | 0         | 0         | 0         |
| Staphylococcus equorum/saprophyticus/xylosus                          | 0         | 0         | 0         | 0         | 0         | 0         | 0         | 0         | 0         | 0         | 0         | 0         | 0         | 0         | 0         | 0         | 0         | 0         |
| Staphylococcus haemolyticus                                           | 0         | 0         | 0         | 0         | 0         | 0         | 0         | 0         | 0         | 0         | 0         | 0         | 0         | 0         | 0         | 0         | 0         | 0         |
| Streptococcus                                                         | 0         | 0         | 0         | 0         | 0         | 0         | 0         | 0         | 0         | 0         | 0         | 0         | 0         | 0         | 0         | 0         | 0         | 0         |
| Streptococcus agalactiae                                              | 0         | 0         | 0         | 0         | 0         | 0         | 0         | 0         | 0         | 0         | 0         | 0         | 0         | 12        | 11        | 0         | 0         | 14        |
| Streptococcus anginosus                                               | 0         | 0         | 0         | 0         | 0         | 0         | 0         | 0         | 0         | 0         | 0         | 0         | 0         | 0         | 0         | 0         | 0         | 0         |
| Streptococcus mitis group                                             | 18        | 8         | 12        | 21        | 12        | 0         | 0         | 0         | 0         | 0         | 12        | 8         | 6         | 13        | 0         | 8         | 18        | 19        |
| Thiopsedomonas                                                        | 0         | 0         | 0         | 0         | 0         | 0         | 0         | 0         | 0         | 0         | 0         | 0         | 0         | 0         | 0         | 0         | 0         | 0         |
| Turicella otitidis                                                    | 0         | 0         | 0         | 0         | 0         | 0         | 0         | 0         | 0         | 0         | 0         | 0         | 0         | 0         | 0         | 0         | 0         | 0         |
| unclassified Clostridiales                                            | 0         | 0         | 0         | 0         | 0         | 0         | 0         | 0         | 0         | 0         | 0         | 0         | 0         | 0         | 0         | 0         | 0         | 0         |
| Undibacterium                                                         | 0         | 0         | 0         | 0         | 0         | 6         | 0         | 0         | 0         | 0         | 0         | 0         | 0         | 0         | 0         | 0         | 0         | 0         |
| Variovorax gossypii                                                   | 0         | 0         | 0         | 0         | 0         | 0         | 0         | 0         | 0         | 0         | 0         | 0         | 0         | 0         | 0         | 0         | 0         | 0         |
| Veillonella                                                           | 0         | 0         | 0         | 0         | 0         | 0         | 0         | 0         | 0         | 0         | 0         | 0         | 0         | 0         | 0         | 0         | 0         | 0         |
| Veillonella dispar/parvula                                            | 0         | 0         | 0         | 0         | 0         | 0         | 0         | 0         | 0         | 0         | 0         | 0         | 0         | 0         | 0         | 0         | 0         | 0         |
| Veillonella montpellierensis                                          | 0         | 0         | 0         | 0         | 0         | 0         | 0         | 0         | 0         | 0         | 0         | 0         | 0         | 0         | 0         | 0         | 0         | 0         |
| Williamsia faeni/muralis                                              | 0         | 0         | 0         | 0         | 0         | 0         | 0         | 0         | 0         | 0         | 0         | 0         | 0         | 0         | 0         | 0         | 0         | 0         |
| Zoogloea resiniphila                                                  | 0         | 0         | 0         | 0         | 0         | 0         | 0         | 0         | 0         | 0         | 0         | 0         | 0         | 0         | 0         | 0         | 0         | 0         |

# Water\_01 - Water\_21

| Species                                                 | water_01 | water_02 | water_03 | water_04 | water_05 | water_06 | water_07 | water_08 | water_09 | water_10 | water_11 | water_12 | water_13 | water_14 | water_15 | water_16 | water_17 | water_18 | water_19 | water_20 | water_21 |
|---------------------------------------------------------|----------|----------|----------|----------|----------|----------|----------|----------|----------|----------|----------|----------|----------|----------|----------|----------|----------|----------|----------|----------|----------|
| [Clostridium] hiranonis                                 | 0        | 0        | 0        | 0        | 0        | 0        | 0        | 0        | 0        | 0        | 0        | 0        | 0        | 0        | 0        | 0        | 0        | 0        | 0        | 0        | 0        |
| Acidovorax/Undibacterium                                | 0        | 0        | 0        | 0        | 0        | 0        | 0        | 0        | 0        | 0        | 0        | 0        | 0        | 0        | 0        | 0        | 0        | 0        | 0        | 0        | 0        |
| Acinetobacter haemolyticus/johnsonii                    | 0        | 0        | 0        | 0        | 0        | 0        | 0        | 0        | 0        | 0        | 0        | 0        | 0        | 0        | 0        | 0        | 0        | 0        | 0        | 0        | 0        |
| Acinetobacter haemolyticus/schindleri                   | 0        | 0        | 0        | 0        | 0        | 0        | 0        | 0        | 0        | 0        | 0        | 0        | 0        | 0        | 0        | 0        | 0        | 0        | 0        | 0        | 0        |
| Acinetobacter parvus                                    | 0        | 0        | 0        | 0        | 0        | 0        | 0        | 0        | 0        | 0        | 0        | 0        | 0        | 0        | 0        | 0        | 0        | 0        | 0        | 0        | 0        |
| Acinetobacter proteolyticus                             | 0        | 0        | 0        | 0        | 0        | 0        | 0        | 0        | 0        | 0        | 0        | 0        | 0        | 0        | 0        | 0        | 0        | 0        | 0        | 0        | 0        |
| Acinetobacter schindleri                                | 0        | 0        | 0        | 0        | 0        | 0        | 0        | 0        | 0        | 0        | 0        | 0        | 0        | 0        | 0        | 0        | 0        | 0        | 0        | 0        | 0        |
| Actinomyces oris/viscosus                               | 0        | 0        | 0        | 0        | 0        | 0        | 0        | 0        | 0        | 0        | 0        | 0        | 0        | 0        | 0        | 0        | 0        | 0        | 0        | 0        | 0        |
| Aerococcus urinaeequi/viridans                          | 0        | 0        | 0        | 0        | 0        | 0        | 0        | 0        | 0        | 0        | 0        | 0        | 0        | 0        | 0        | 0        | 0        | 0        | 0        | 0        | 0        |
| Aeromonas caviae                                        | 0        | 0        | 0        | 0        | 0        | 0        | 0        | 0        | 0        | 0        | 0        | 0        | 0        | 0        | 0        | 0        | 0        | 0        | 0        | 0        | 0        |
| Aeromonas veronii                                       | 0        | 0        | 0        | 0        | 0        | 0        | 0        | 0        | 0        | 0        | 0        | 0        | 0        | 0        | 0        | 0        | 0        | 0        | 0        | 0        | 0        |
| Afipia                                                  | 0        | 0        | 0        | 0        | 0        | 0        | 0        | 0        | 0        | 0        | 0        | 0        | 0        | 0        | 0        | 0        | 0        | 0        | 0        | 0        | 0        |
| Aggregatibacter aphrophilus                             | 0        | 0        | 0        | 0        | 0        | 0        | 0        | 0        | 0        | 0        | 0        | 0        | 0        | 0        | 0        | 0        | 0        | 0        | 0        | 0        | 0        |
| Alishewanella                                           | 0        | 0        | 0        | 0        | 0        | 0        | 0        | 0        | 0        | 0        | 0        | 0        | 0        | 0        | 0        | 0        | 0        | 0        | 0        | 0        | 0        |
| Alloiooccus                                             | 0        | 0        | 0        | 0        | 0        | 0        | 0        | 0        | 0        | 0        | 0        | 0        | 0        | 0        | 0        | 0        | 0        | 0        | 0        | 0        | 0        |
| Altererythrobacter epoxidivorans                        | 0        | 0        | 0        | 0        | 0        | 0        | 0        | 0        | 0        | 0        | 0        | 0        | 0        | 0        | 0        | 0        | 0        | 0        | 0        | 0        | 0        |
| Anaerococcus                                            | 0        | 0        | 0        | 0        | 0        | 0        | 0        | 0        | 0        | 0        | 0        | 0        | 0        | 0        | 0        | 0        | 0        | 0        | 0        | 0        | 0        |
| Anaerococcus lactolyticus                               | 0        | 0        | 0        | 0        | 0        | 0        | 0        | 0        | 0        | 11       | 0        | 0        | 0        | 0        | 0        | 0        | 0        | 0        | 0        | 0        | 0        |
| Anaerococcus octavius                                   | 0        | 0        | 0        | 0        | 0        | 0        | 0        | 0        | 0        | 0        | 0        | 0        | 0        | 0        | 0        | 0        | 0        | 0        | 0        | 0        | 0        |
| Anaerococcus prevotii/tetradius                         | 0        | 0        | 0        | 0        | 0        | 0        | 0        | 0        | 0        | 0        | 0        | 0        | 0        | 0        | 0        | 0        | 0        | 0        | 0        | 0        | 0        |
| Anaeromyxobacter                                        | 0        | 0        | 0        | 0        | 0        | 0        | 0        | 0        | 0        | 0        | 0        | 0        | 0        | 0        | 0        | 0        | 0        | 0        | 0        | 0        | 0        |
| Arenimonas                                              | 0        | 0        | 0        | 0        | 0        | 0        | 0        | 0        | 0        | 0        | 0        | 0        | 0        | 0        | 0        | 0        | 0        | 0        | 0        | 0        | 0        |
| Atopobium vaginae                                       | 0        | 0        | 0        | 0        | 0        | 0        | 0        | 0        | 0        | 0        | 0        | 0        | 0        | 0        | 0        | 0        | 0        | 0        | 0        | 0        | 0        |
| Bacillaceae                                             | 0        | 0        | 0        | 0        | 0        | 0        | 0        | 0        | 0        | 0        | 0        | 0        | 0        | 0        | 0        | 0        | 0        | 0        | 0        | 0        | 0        |
| Bacillus dakarensis                                     | 0        | 0        | 0        | 0        | 0        | 0        | 0        | 0        | 0        | 0        | 0        | 0        | 0        | 0        | 0        | 0        | 0        | 0        | 0        | 0        | 0        |
| Bacillus foraminis                                      | 0        | 0        | 0        | 0        | 0        | 0        | 0        | 0        | 0        | 0        | 0        | 0        | 0        | 0        | 0        | 0        | 0        | 0        | 0        | 0        | 0        |
| Bacillus idriensis                                      | 0        | 0        | 0        | 0        | 0        | 0        | 0        | 0        | 0        | 0        | 0        | 0        | 0        | 0        | 0        | 0        | 0        | 0        | 0        | 0        | 0        |
| Bacillus malikii                                        | 0        | 0        | 0        | 0        | 0        | 0        | 0        | 0        | 0        | 0        | 0        | 0        | 0        | 0        | 0        | 0        | 0        | 0        | 0        | 0        | 0        |
| Bacteroidales                                           | 0        | 0        | 0        | 0        | 0        | 0        | 0        | 0        | 0        | 0        | 0        | 0        | 0        | 0        | 0        | 0        | 0        | 0        | 0        | 0        | 0        |
| Bergeyella                                              | 0        | 0        | 0        | 0        | 0        | 0        | 0        | 0        | 0        | 0        | 0        | 0        | 0        | 0        | 0        | 0        | 0        | 0        | 0        | 0        | 0        |
| Betaproteobacteria                                      | 0        | 0        | 0        | 0        | 0        | 0        | 0        | 0        | 0        | 0        | 0        | 0        | 0        | 0        | 0        | 0        | 0        | 0        | 0        | 0        | 0        |
| Blastococcus endophyticus                               | 0        | 0        | 0        | 0        | 0        | 0        | 0        | 0        | 0        | 0        | 0        | 0        | 0        | 0        | 0        | 0        | 0        | 0        | 0        | 0        | 0        |
| Brevibacterium                                          | 0        | 0        | 0        | 0        | 0        | 0        | 0        | 0        | 0        | 0        | 0        | 0        | 0        | 0        | 0        | 0        | 0        | 0        | 0        | 0        | 0        |
| Brevibacterium casei                                    | 0        | 0        | 0        | 0        | 0        | 0        | 0        | 0        | 0        | 0        | 0        | 0        | 0        | 0        | 0        | 0        | 0        | 0        | 0        | 0        | 0        |
| Brevibacterium ihuae                                    | 0        | 0        | 0        | 0        | 0        | 0        | 0        | 0        | 0        | 0        | 0        | 0        | 0        | 0        | 0        | 0        | 0        | 0        | 0        | 0        | 0        |
| Brevundimonas                                           | 0        | 0        | 0        | 0        | 0        | 0        | 0        | 0        | 0        | 0        | 0        | 0        | 0        | 0        | 0        | 0        | 0        | 0        | 0        | 0        | 0        |
| Brevundimonas vesicularis                               | 0        | 0        | 0        | 0        | 0        | 0        | 0        | 0        | 0        | 0        | 0        | 0        | 0        | 0        | 0        | 0        | 0        | 0        | 0        | 0        | 0        |
| Brevundimonas/Caulobacter                               | 0        | 0        | 0        | 0        | 0        | 0        | 0        | 0        | 0        | 0        | 0        | 0        | 0        | 0        | 0        | 0        | 0        | 0        | 0        | 0        | 0        |
| Burkholderia pyrrocinia/stabilis                        | 0        | 0        | 0        | 0        | 0        | 0        | 0        | 0        | 0        | 0        | 0        | 0        | 0        | 13       | 0        | 0        | 0        | 0        | 0        | 0        | 0        |
| Burkholderiales Genera incertae sedis                   | 0        | 0        | 0        | 0        | 0        | 0        | 0        | 0        | 0        | 0        | 0        | 0        | 0        | 0        | 0        | 0        | 0        | 0        | 0        | 0        | 0        |
| Campylobacter rectus/showae                             | 0        | 0        | 0        | 0        | 0        | 0        | 0        | 0        | 0        | 0        | 0        | 0        | 0        | 0        | 0        | 0        | 0        | 0        | 0        | 0        | 0        |
| Candidatus Saccharibacteria                             | 0        | 0        | 0        | 0        | 0        | 0        | 0        | 0        | 0        | 0        | 0        | 0        | 0        | 0        | 0        | 0        | 0        | 0        | 0        | 0        | 0        |
| Candidatus Saccharimonas                                | 0        | 0        | 0        | 0        | 0        | 0        | 0        | 0        | 0        | 0        | 0        | 0        | 0        | 0        | 0        | 0        | 0        | 0        | 0        | 0        | 0        |
| Capnocytophaga                                          | 0        | 0        | 0        | 0        | 0        | 0        | 0        | 0        | 0        | 0        | 0        | 0        | 0        | 0        | 0        | 0        | 0        | 0        | 0        | 0        | 0        |
| Cardiobacterium hominis                                 | 0        | 0        | 0        | 0        | 0        | 0        | 0        | 0        | 0        | 0        | 0        | 0        | 0        | 0        | 0        | 0        | 0        | 0        | 0        | 0        | 0        |
| Carnobacteriaceae                                       | 0        | 0        | 0        | 0        | 0        | 0        | 0        | 0        | 0        | 0        | 0        | 0        | 0        | 0        | 0        | 0        | 0        | 0        | 0        | 0        | 0        |
| Carnobacterium in hibens/jeotgali                       | 0        | 0        | 0        | 0        | 0        | 0        | 0        | 0        | 0        | 0        | 0        | 0        | 0        | 0        | 0        | 0        | 0        | 0        | 0        | 0        | 0        |
| Casaltella massiliensis                                 | 0        | 0        | 0        | 0        | 0        | 0        | 0        | 0        | 0        | 0        | 0        | 0        | 0        | 0        | 0        | 0        | 0        | 0        | 0        | 0        | 0        |
| Chelatococcus asaccharovorans                           | 0        | 0        | 0        | 0        | 0        | 0        | 0        | 0        | 0        | 0        | 0        | 0        | 0        | 0        | 0        | 0        | 0        | 0        | 0        | 0        | 0        |
| Chelatococcus/Methylobacterium                          | 0        | 0        | 0        | 0        | 0        | 0        | 0        | 0        | 0        | 0        | 0        | 0        | 0        | 0        | 0        | 0        | 0        | 0        | 0        | 0        | 0        |
| Chryseobacterium                                        | 0        | 0        | 0        | 0        | 0        | 0        | 0        | 0        | 0        | 0        | 0        | 0        | 0        | 0        | 0        | 0        | 0        | 0        | 0        | 0        | 0        |
| Chryseobacterium hominis                                | 0        | 0        | 0        | 0        | 0        | 0        | 0        | 0        | 0        | 0        | 0        | 0        | 0        | 0        | 0        | 0        | 0        | 0        | 0        | 0        | 0        |
| Chryseomicrobium amylolyticum                           | 0        | 0        | 0        | 0        | 0        | 0        | 0        | 0        | 0        | 0        | 0        | 0        | 0        | 0        | 0        | 0        | 0        | 0        | 0        | 0        | 0        |
| Cloacibacterium normanense                              | 0        | 0        | 0        | 0        | 0        | 0        | 0        | 0        | 0        | 0        | 0        | 0        | 0        | 0        | 0        | 0        | 0        | 0        | 0        | 0        | 0        |
| Clostridium                                             | 0        | 0        | 0        | 0        | 0        | 0        | 0        | 0        | 0        | 0        | 0        | 0        | 0        | 0        | 0        | 0        | 0        | 0        | 0        | 0        | 0        |
| Corynebacteriales                                       | 0        | 0        | 0        | 0        | 0        | 0        | 0        | 0        | 0        | 0        | 0        | 0        | 0        | 0        | 0        | 0        | 0        | 0        | 0        | 0        | 0        |
| Corynebacterium                                         | 0        | 0        | 0        | 0        | 0        | 0        | 0        | 0        | 0        | 0        | 0        | 0        | 0        | 0        | 0        | 0        | 0        | 0        | 0        | 0        | 0        |
| Corynebacterium accolens/macginleyi                     | 0        | 0        | 0        | 0        | 0        | 0        | 0        | 0        | 0        | 0        | 0        | 0        | 0        | 0        | 0        | 0        | 0        | 0        | 0        | 0        | 0        |
| Corynebacterium appendicis                              | 0        | 0        | 0        | 0        | 0        | 0        | 0        | 0        | 0        | 0        | 0        | 0        | 0        | 0        | 0        | 0        | 0        | 0        | 0        | 0        | 0        |
| Corynebacterium aurimucosum/minutissimum/singulare      | 0        | 0        | 0        | 0        | 0        | 0        | 0        | 0        | 0        | 0        | 0        | 0        | 0        | 0        | 0        | 0        | 0        | 0        | 0        | 0        | 0        |
| Corynebacterium coyleae                                 | 0        | 0        | 0        | 0        | 0        | 0        | 0        | 0        | 0        | 0        | 0        | 0        | 0        | 0        | 0        | 0        | 0        | 0        | 0        | 0        | 0        |
| Corynebacterium fournierii/mucifaciens/ureicelerivorans | 0        | 0        | 0        | 0        | 0        | 0        | 0        | 0        | 0        | 0        | 0        | 0        | 0        | 0        | 0        | 0        | 0        | 0        | 0        | 0        | 0        |
| Corynebacterium hadale/imitans                          | 0        | 0        | 0        | 0        | 0        | 0        | 0        | 0        | 0        | 0        | 0        | 0        | 0        | 0        | 0        | 0        | 0        | 0        | 0        | 0        | 0        |
| Corynebacterium pollutisoli                             | 0        | 0        | 0        | 0        | 0        | 0        | 0        | 0        | 0        | 0        | 0        | 0        | 0        | 0        | 0        | 0        | 0        | 0        | 0        | 0        | 0        |
| Corynebacterium propinquum/pseudodiphtheriticum         | 0        | 0        | 0        | 0        | 0        | 0        | 0        | 0        | 0        | 0        | 0        | 0        | 0        | 0        | 0        | 0        | 0        | 0        | 0        | 0        | 0        |
| Corynebacterium pseudogenitalium/tuberculoostearicum    | 0        | 0        | 0        | 0        | 0        | 0        | 0        | 0        | 0        | 0        | 0        | 0        | 0        | 0        | 0        | 0        | 0        | 0        | 0        | 0        | 0        |
| Craurococcus roseus                                     | 0        | 0        | 0        | 0        | 0        | 0        | 0        | 0        | 0        | 0        | 0        | 0        | 0        | 0        | 0        | 0        | 0        | 0        | 0        | 0        | 0        |
| Curvibacter                                             | 0        | 0        | 0        | 0        | 0        | 0        | 0        | 0        | 0        | 0        | 0        | 0        | 0        | 0        | 0        | 0        | 0        | 0        | 0        | 0        | 0        |



# Water\_01 - Water\_21

| Species                                                               | water_01 | water_02 | water_03 | water_04 | water_05 | water_06 | water_07 | water_08 | water_09 | water_10 | water_11 | water_12 | water_13 | water_14 | water_15 | water_16 | water_17 | water_18 | water_19 | water_20 | water_21 |
|-----------------------------------------------------------------------|----------|----------|----------|----------|----------|----------|----------|----------|----------|----------|----------|----------|----------|----------|----------|----------|----------|----------|----------|----------|----------|
| Noviherbaspirillum                                                    | 0        | 0        | 0        | 0        | 0        | 0        | 0        | 0        | 0        | 0        | 0        | 0        | 0        | 0        | 0        | 0        | 0        | 0        | 0        | 0        | 0        |
| Novosphingobium pentaromativorans/resinovorum                         | 0        | 0        | 0        | 0        | 0        | 0        | 0        | 0        | 0        | 0        | 0        | 0        | 0        | 0        | 0        | 0        | 0        | 0        | 0        | 0        | 0        |
| Paenibacillus                                                         | 0        | 0        | 0        | 0        | 0        | 0        | 0        | 0        | 0        | 0        | 0        | 0        | 0        | 0        | 0        | 0        | 0        | 0        | 0        | 0        | 0        |
| Pantoea agglomerans/dispersa                                          | 0        | 0        | 0        | 0        | 0        | 0        | 0        | 0        | 0        | 0        | 0        | 0        | 0        | 0        | 0        | 0        | 0        | 0        | 0        | 0        | 0        |
| Pantoea stewartii                                                     | 0        | 0        | 0        | 0        | 0        | 0        | 0        | 0        | 0        | 0        | 0        | 0        | 0        | 0        | 0        | 0        | 0        | 0        | 0        | 0        | 0        |
| Paracoccus                                                            | 0        | 0        | 0        | 0        | 0        | 0        | 0        | 0        | 0        | 0        | 0        | 0        | 0        | 0        | 0        | 0        | 0        | 0        | 0        | 0        | 0        |
| Peptoniphilus asaccharolyticus/grossensis/harei/phoceensis/rhinitidis | 0        | 0        | 0        | 0        | 4        | 0        | 0        | 0        | 0        | 0        | 0        | 0        | 0        | 0        | 0        | 0        | 0        | 0        | 0        | 0        | 0        |
| Phycococcus                                                           | 0        | 0        | 0        | 0        | 0        | 0        | 0        | 0        | 0        | 0        | 0        | 0        | 0        | 0        | 0        | 0        | 0        | 0        | 0        | 0        | 0        |
| Pontibacter                                                           | 0        | 0        | 0        | 0        | 0        | 0        | 0        | 0        | 0        | 0        | 0        | 0        | 0        | 0        | 0        | 0        | 0        | 0        | 0        | 0        | 0        |
| Porphyromonas                                                         | 0        | 0        | 0        | 0        | 0        | 0        | 0        | 0        | 0        | 0        | 0        | 0        | 0        | 0        | 0        | 0        | 0        | 0        | 0        | 0        | 0        |
| Prevotella                                                            | 0        | 0        | 0        | 0        | 0        | 0        | 0        | 0        | 0        | 0        | 0        | 0        | 0        | 0        | 0        | 0        | 0        | 0        | 0        | 0        | 6        |
| Prevotella amnii                                                      | 0        | 0        | 0        | 0        | 0        | 2        | 0        | 0        | 0        | 0        | 0        | 0        | 0        | 0        | 0        | 0        | 0        | 0        | 0        | 0        | 0        |
| Prevotella disiens                                                    | 0        | 0        | 0        | 0        | 0        | 0        | 0        | 0        | 0        | 0        | 0        | 0        | 0        | 0        | 0        | 0        | 0        | 0        | 0        | 0        | 0        |
| Prevotella melaninogenica                                             | 0        | 0        | 0        | 0        | 0        | 0        | 0        | 0        | 0        | 0        | 0        | 0        | 0        | 0        | 0        | 0        | 0        | 0        | 0        | 0        | 0        |
| Prevotella timonensis                                                 | 0        | 0        | 0        | 0        | 0        | 0        | 0        | 0        | 0        | 0        | 0        | 0        | 0        | 0        | 0        | 0        | 0        | 0        | 0        | 0        | 0        |
| Pseudoclavibacter                                                     | 0        | 0        | 0        | 0        | 0        | 0        | 0        | 0        | 0        | 0        | 0        | 0        | 0        | 0        | 0        | 0        | 0        | 0        | 0        | 0        | 0        |
| Pseudomonas antarctica/fluorescens                                    | 0        | 0        | 0        | 0        | 0        | 0        | 11       | 0        | 0        | 0        | 0        | 0        | 0        | 0        | 0        | 0        | 0        | 0        | 0        | 0        | 0        |
| Pseudomonas baetica                                                   | 0        | 0        | 0        | 0        | 0        | 0        | 0        | 0        | 0        | 0        | 0        | 0        | 0        | 0        | 0        | 0        | 0        | 0        | 0        | 0        | 0        |
| Pseudomonas fluorescens/koreensis                                     | 0        | 0        | 0        | 0        | 0        | 0        | 0        | 0        | 0        | 0        | 0        | 0        | 0        | 0        | 0        | 0        | 0        | 0        | 0        | 0        | 0        |
| Pseudomonas gessardii                                                 | 0        | 0        | 0        | 0        | 0        | 0        | 0        | 0        | 0        | 0        | 0        | 0        | 0        | 0        | 0        | 0        | 0        | 0        | 0        | 0        | 0        |
| Pseudomonas monteilli                                                 | 0        | 0        | 0        | 0        | 0        | 0        | 0        | 0        | 0        | 0        | 0        | 0        | 0        | 0        | 0        | 0        | 0        | 0        | 0        | 0        | 0        |
| Pseudomonas oleovorans/pseudoalcaligenes group                        | 0        | 0        | 0        | 0        | 0        | 0        | 0        | 0        | 0        | 0        | 0        | 0        | 0        | 0        | 0        | 0        | 0        | 0        | 0        | 0        | 0        |
| Pseudomonas resinovorans                                              | 0        | 0        | 0        | 0        | 0        | 0        | 0        | 0        | 0        | 0        | 0        | 0        | 0        | 0        | 0        | 0        | 0        | 0        | 0        | 0        | 0        |
| Pseudomonas stutzeri group                                            | 0        | 0        | 0        | 0        | 0        | 0        | 0        | 0        | 0        | 0        | 0        | 0        | 0        | 0        | 0        | 0        | 0        | 0        | 0        | 0        | 0        |
| Pseudomonas stutzeri subgroup                                         | 0        | 0        | 0        | 0        | 0        | 0        | 0        | 0        | 0        | 0        | 0        | 0        | 0        | 0        | 0        | 0        | 0        | 0        | 0        | 0        | 0        |
| Pseudomonas veronii                                                   | 0        | 0        | 0        | 0        | 0        | 0        | 0        | 0        | 0        | 0        | 0        | 0        | 0        | 0        | 0        | 0        | 0        | 0        | 0        | 0        | 0        |
| Pseudoxanthomonas indica                                              | 0        | 0        | 0        | 0        | 0        | 0        | 0        | 0        | 0        | 0        | 0        | 0        | 0        | 0        | 0        | 0        | 0        | 0        | 0        | 0        | 0        |
| Pseudoxanthomonas mexicana                                            | 0        | 0        | 0        | 0        | 0        | 0        | 0        | 0        | 0        | 0        | 0        | 0        | 0        | 0        | 0        | 0        | 0        | 0        | 0        | 0        | 0        |
| Psychrobacter alimentarius                                            | 0        | 0        | 0        | 0        | 0        | 0        | 0        | 0        | 0        | 0        | 0        | 0        | 0        | 0        | 0        | 0        | 0        | 0        | 0        | 0        | 0        |
| Rheinheimera                                                          | 0        | 0        | 0        | 0        | 0        | 0        | 0        | 0        | 0        | 0        | 0        | 0        | 0        | 0        | 0        | 0        | 0        | 0        | 0        | 0        | 0        |
| Rheinheimera perlucida                                                | 0        | 0        | 0        | 0        | 0        | 0        | 0        | 0        | 0        | 0        | 0        | 0        | 0        | 0        | 0        | 0        | 0        | 0        | 0        | 0        | 0        |
| Rhodobacter                                                           | 0        | 0        | 0        | 0        | 0        | 0        | 0        | 0        | 0        | 0        | 0        | 0        | 0        | 0        | 0        | 0        | 0        | 0        | 0        | 0        | 0        |
| Rhodobacteraceae                                                      | 0        | 0        | 0        | 0        | 0        | 0        | 0        | 0        | 0        | 0        | 0        | 0        | 0        | 0        | 0        | 0        | 0        | 0        | 0        | 0        | 0        |
| Rhodococcus corynebacterioides/kroppenstedtii                         | 0        | 0        | 0        | 0        | 0        | 0        | 0        | 0        | 0        | 0        | 0        | 0        | 0        | 0        | 0        | 0        | 0        | 0        | 0        | 0        | 0        |
| Romboutsia timonensis                                                 | 0        | 0        | 0        | 0        | 0        | 0        | 0        | 0        | 0        | 0        | 0        | 0        | 0        | 0        | 0        | 0        | 0        | 0        | 0        | 0        | 0        |
| Rothia                                                                | 0        | 0        | 0        | 0        | 0        | 0        | 0        | 0        | 0        | 0        | 0        | 0        | 0        | 0        | 0        | 0        | 0        | 0        | 0        | 0        | 0        |
| Rothia amarae                                                         | 0        | 0        | 0        | 0        | 0        | 0        | 0        | 0        | 0        | 0        | 0        | 0        | 0        | 0        | 0        | 0        | 0        | 0        | 0        | 0        | 0        |
| Saccharopolyspora                                                     | 0        | 0        | 0        | 0        | 0        | 0        | 0        | 0        | 0        | 0        | 0        | 0        | 0        | 0        | 0        | 0        | 0        | 0        | 0        | 0        | 0        |
| Shigella/Escherichia                                                  | 0        | 0        | 0        | 0        | 10       | 35       | 11       | 5        | 25       | 26       | 47       | 32       | 71       | 89       | 10       | 22       | 60       | 7        | 32       | 0        | 0        |
| Sneathia                                                              | 0        | 0        | 0        | 0        | 0        | 0        | 0        | 0        | 0        | 0        | 0        | 0        | 8        | 0        | 0        | 0        | 0        | 0        | 0        | 0        | 0        |
| Sneathia amnii                                                        | 0        | 0        | 0        | 0        | 0        | 0        | 0        | 0        | 0        | 0        | 0        | 0        | 0        | 0        | 0        | 0        | 0        | 0        | 0        | 0        | 0        |
| Sneathia sanguinigena                                                 | 0        | 0        | 6        | 0        | 0        | 0        | 0        | 0        | 0        | 0        | 0        | 0        | 0        | 0        | 0        | 0        | 0        | 0        | 0        | 0        | 0        |
| Sphingobium yanoikuyae                                                | 0        | 0        | 0        | 0        | 0        | 0        | 0        | 0        | 0        | 0        | 0        | 0        | 0        | 0        | 0        | 0        | 0        | 0        | 0        | 0        | 0        |
| Sphingomonas kaistensis                                               | 0        | 0        | 0        | 0        | 0        | 0        | 0        | 0        | 0        | 0        | 0        | 0        | 0        | 0        | 0        | 0        | 0        | 0        | 0        | 0        | 0        |
| Sphingomonas starnbergensis                                           | 0        | 0        | 0        | 0        | 0        | 0        | 0        | 0        | 0        | 0        | 0        | 0        | 0        | 0        | 0        | 0        | 0        | 0        | 0        | 0        | 0        |
| Staphylococcus aureus                                                 | 0        | 0        | 0        | 0        | 0        | 0        | 0        | 0        | 0        | 0        | 0        | 0        | 0        | 0        | 0        | 0        | 0        | 0        | 0        | 0        | 0        |
| Staphylococcus capitis/caprae                                         | 0        | 0        | 0        | 0        | 0        | 0        | 0        | 0        | 0        | 0        | 0        | 0        | 0        | 0        | 0        | 0        | 0        | 0        | 0        | 0        | 0        |
| Staphylococcus caprae/cohnii/epidermidis                              | 0        | 0        | 0        | 0        | 0        | 0        | 0        | 0        | 0        | 0        | 0        | 0        | 0        | 0        | 0        | 4        | 0        | 0        | 0        | 0        | 0        |
| Staphylococcus cohnii/saprophyticus                                   | 0        | 0        | 0        | 0        | 0        | 0        | 0        | 0        | 0        | 0        | 0        | 0        | 0        | 0        | 0        | 0        | 0        | 0        | 0        | 0        | 0        |
| Staphylococcus epidermidis/hominis                                    | 0        | 0        | 0        | 0        | 0        | 0        | 0        | 0        | 0        | 0        | 0        | 0        | 0        | 0        | 0        | 0        | 0        | 0        | 0        | 0        | 0        |
| Staphylococcus equorum/saprophyticus/xylosus                          | 0        | 0        | 0        | 0        | 0        | 0        | 0        | 0        | 0        | 0        | 0        | 0        | 0        | 0        | 0        | 0        | 0        | 0        | 0        | 0        | 0        |
| Staphylococcus haemolyticus                                           | 0        | 0        | 0        | 0        | 0        | 0        | 0        | 0        | 0        | 0        | 0        | 0        | 0        | 0        | 0        | 0        | 0        | 0        | 0        | 0        | 0        |
| Streptococcus                                                         | 0        | 0        | 0        | 0        | 0        | 0        | 0        | 0        | 0        | 0        | 0        | 0        | 0        | 0        | 0        | 0        | 0        | 0        | 0        | 0        | 0        |
| Streptococcus agalactiae                                              | 0        | 14       | 0        | 0        | 0        | 0        | 0        | 0        | 0        | 0        | 3        | 0        | 0        | 0        | 0        | 0        | 0        | 0        | 0        | 0        | 12       |
| Streptococcus anginosus                                               | 0        | 0        | 0        | 7        | 0        | 0        | 0        | 0        | 0        | 0        | 0        | 0        | 0        | 0        | 0        | 0        | 0        | 0        | 0        | 3        | 0        |
| Streptococcus mitis group                                             | 0        | 0        | 22       | 40       | 20       | 0        | 25       | 0        | 0        | 6        | 47       | 26       | 14       | 39       | 20       | 0        | 19       | 14       | 0        | 0        | 12       |
| Thiopseudomonas                                                       | 0        | 0        | 0        | 0        | 0        | 0        | 0        | 0        | 0        | 0        | 0        | 0        | 0        | 0        | 0        | 0        | 0        | 0        | 0        | 0        | 0        |
| Turicella otitidis                                                    | 0        | 0        | 0        | 0        | 0        | 0        | 0        | 0        | 0        | 0        | 0        | 0        | 0        | 0        | 0        | 0        | 0        | 0        | 0        | 0        | 0        |
| unclassified Clostridiales                                            | 0        | 0        | 0        | 0        | 0        | 0        | 0        | 0        | 0        | 0        | 0        | 0        | 0        | 0        | 0        | 0        | 0        | 0        | 0        | 0        | 0        |
| Undibacterium                                                         | 0        | 0        | 0        | 0        | 0        | 0        | 0        | 0        | 0        | 0        | 0        | 0        | 0        | 0        | 0        | 0        | 0        | 0        | 0        | 0        | 0        |
| Variovorax gossypii                                                   | 0        | 0        | 0        | 0        | 0        | 0        | 0        | 0        | 0        | 0        | 0        | 0        | 0        | 0        | 0        | 0        | 0        | 0        | 0        | 0        | 0        |
| Veillonella                                                           | 0        | 0        | 0        | 0        | 0        | 0        | 0        | 0        | 0        | 0        | 0        | 0        | 0        | 0        | 0        | 0        | 0        | 0        | 0        | 0        | 0        |
| Veillonella dispar/parvula                                            | 0        | 0        | 0        | 0        | 0        | 0        | 0        | 0        | 0        | 0        | 0        | 0        | 0        | 0        | 0        | 0        | 0        | 0        | 0        | 0        | 0        |
| Veillonella montpellierensis                                          | 0        | 0        | 0        | 0        | 0        | 0        | 0        | 0        | 0        | 0        | 0        | 0        | 0        | 0        | 0        | 0        | 0        | 0        | 0        | 0        | 0        |
| Williamsia faeni/muralis                                              | 0        | 0        | 0        | 0        | 0        | 0        | 0        | 0        | 0        | 0        | 0        | 0        | 0        | 0        | 0        | 0        | 0        | 0        | 0        | 0        | 0        |
| Zoogloea resiniphila                                                  | 0        | 0        | 0        | 0        | 0        | 0        | 0        | 0        | 0        | 0        | 0        | 0        | 0        | 0        | 0        | 0        | 0        | 0        | 0        | 0        | 0        |

# Water\_22 - Water\_42

| Species                                                 | water_22 | water_23 | water_24 | water_25 | water_26 | water_27 | water_28 | water_29 | water_30 | water_31 | water_32 | water_33 | water_34 | water_35 | water_36 | water_37 | water_38 | water_39 | water_40 | water_41 | water_42 |
|---------------------------------------------------------|----------|----------|----------|----------|----------|----------|----------|----------|----------|----------|----------|----------|----------|----------|----------|----------|----------|----------|----------|----------|----------|
| [Clostridium] hiranonis                                 | 0        | 0        | 0        | 0        | 0        | 0        | 0        | 0        | 0        | 0        | 0        | 0        | 0        | 0        | 0        | 0        | 0        | 0        | 0        | 0        | 0        |
| Acidovorax/Undibacterium                                | 0        | 0        | 0        | 0        | 0        | 0        | 0        | 0        | 0        | 0        | 0        | 0        | 0        | 0        | 0        | 0        | 0        | 0        | 0        | 0        | 0        |
| Acinetobacter haemolyticus/johnsonii                    | 0        | 0        | 0        | 0        | 0        | 0        | 0        | 0        | 0        | 0        | 0        | 0        | 0        | 0        | 0        | 0        | 0        | 0        | 0        | 0        | 0        |
| Acinetobacter haemolyticus/schindleri                   | 0        | 0        | 0        | 0        | 0        | 0        | 0        | 0        | 0        | 0        | 0        | 0        | 0        | 0        | 0        | 0        | 0        | 0        | 0        | 0        | 0        |
| Acinetobacter parvus                                    | 0        | 0        | 0        | 0        | 0        | 0        | 0        | 0        | 0        | 0        | 0        | 0        | 0        | 0        | 0        | 0        | 0        | 0        | 0        | 0        | 0        |
| Acinetobacter proteolyticus                             | 0        | 0        | 0        | 0        | 0        | 0        | 0        | 0        | 0        | 0        | 0        | 0        | 0        | 0        | 0        | 0        | 0        | 0        | 0        | 0        | 0        |
| Acinetobacter schindleri                                | 0        | 0        | 0        | 0        | 0        | 0        | 0        | 0        | 0        | 0        | 0        | 0        | 0        | 0        | 0        | 0        | 0        | 0        | 0        | 0        | 0        |
| Actinomyces oris/viscosus                               | 0        | 0        | 0        | 0        | 0        | 0        | 0        | 0        | 0        | 0        | 0        | 0        | 0        | 0        | 0        | 0        | 0        | 0        | 0        | 0        | 0        |
| Aerococcus urinaeequi/viridans                          | 0        | 0        | 0        | 0        | 0        | 0        | 0        | 0        | 0        | 0        | 0        | 0        | 0        | 0        | 0        | 0        | 0        | 0        | 0        | 0        | 0        |
| Aeromonas caviae                                        | 0        | 0        | 0        | 0        | 0        | 0        | 0        | 0        | 0        | 0        | 0        | 0        | 0        | 0        | 0        | 0        | 0        | 0        | 0        | 0        | 0        |
| Aeromonas veronii                                       | 0        | 0        | 0        | 0        | 0        | 0        | 0        | 0        | 0        | 0        | 0        | 0        | 0        | 0        | 0        | 0        | 0        | 0        | 0        | 0        | 0        |
| Afipia                                                  | 0        | 0        | 0        | 0        | 0        | 0        | 10       | 0        | 0        | 0        | 0        | 0        | 0        | 0        | 0        | 0        | 0        | 0        | 0        | 0        | 0        |
| Aggregatibacter aphrophilus                             | 0        | 0        | 0        | 0        | 0        | 0        | 0        | 0        | 0        | 0        | 0        | 0        | 0        | 0        | 0        | 0        | 0        | 0        | 0        | 0        | 0        |
| Alishewanella                                           | 0        | 0        | 0        | 0        | 0        | 0        | 0        | 0        | 0        | 0        | 0        | 0        | 0        | 0        | 0        | 0        | 0        | 0        | 0        | 0        | 0        |
| Alloiooccus                                             | 0        | 0        | 0        | 0        | 0        | 0        | 0        | 0        | 0        | 0        | 0        | 0        | 0        | 0        | 0        | 0        | 0        | 0        | 0        | 0        | 0        |
| Altererythrobacter epoxidivorans                        | 0        | 0        | 0        | 0        | 0        | 0        | 0        | 0        | 0        | 0        | 0        | 0        | 0        | 0        | 0        | 0        | 0        | 0        | 0        | 0        | 0        |
| Anaerococcus                                            | 0        | 0        | 0        | 0        | 0        | 0        | 0        | 0        | 0        | 0        | 0        | 0        | 0        | 0        | 0        | 0        | 0        | 0        | 0        | 0        | 0        |
| Anaerococcus lactolyticus                               | 0        | 0        | 0        | 0        | 0        | 0        | 0        | 0        | 0        | 0        | 0        | 0        | 0        | 0        | 0        | 0        | 0        | 0        | 0        | 0        | 0        |
| Anaerococcus octavius                                   | 0        | 0        | 0        | 0        | 0        | 0        | 0        | 0        | 0        | 0        | 0        | 0        | 0        | 0        | 0        | 0        | 0        | 0        | 0        | 0        | 0        |
| Anaerococcus prevotii/tetradius                         | 0        | 0        | 0        | 0        | 0        | 0        | 0        | 0        | 0        | 0        | 0        | 0        | 0        | 0        | 0        | 0        | 0        | 0        | 0        | 0        | 0        |
| Anaeromyxobacter                                        | 0        | 0        | 0        | 0        | 0        | 0        | 0        | 0        | 0        | 0        | 0        | 0        | 0        | 0        | 0        | 0        | 0        | 0        | 0        | 0        | 0        |
| Arenimonas                                              | 0        | 0        | 0        | 0        | 0        | 0        | 0        | 0        | 0        | 0        | 0        | 0        | 0        | 0        | 0        | 0        | 0        | 0        | 0        | 0        | 0        |
| Atopobium vaginae                                       | 0        | 0        | 0        | 0        | 0        | 0        | 0        | 0        | 0        | 0        | 0        | 0        | 0        | 0        | 0        | 0        | 0        | 0        | 0        | 0        | 0        |
| Bacillaceae                                             | 0        | 0        | 0        | 0        | 0        | 0        | 0        | 0        | 0        | 0        | 0        | 0        | 0        | 0        | 0        | 0        | 0        | 0        | 0        | 0        | 0        |
| Bacillus dakarensis                                     | 0        | 0        | 0        | 0        | 0        | 0        | 0        | 0        | 0        | 0        | 0        | 0        | 0        | 0        | 0        | 0        | 0        | 0        | 0        | 0        | 0        |
| Bacillus foraminis                                      | 0        | 0        | 0        | 0        | 0        | 0        | 0        | 0        | 0        | 0        | 0        | 0        | 0        | 0        | 0        | 0        | 0        | 0        | 0        | 0        | 0        |
| Bacillus idriensis                                      | 0        | 0        | 0        | 0        | 0        | 0        | 0        | 0        | 0        | 0        | 0        | 0        | 0        | 0        | 0        | 0        | 0        | 0        | 0        | 0        | 0        |
| Bacillus malikii                                        | 0        | 0        | 0        | 0        | 0        | 0        | 0        | 0        | 0        | 0        | 0        | 0        | 0        | 0        | 0        | 0        | 0        | 0        | 0        | 0        | 0        |
| Bacteroidales                                           | 0        | 0        | 0        | 0        | 0        | 0        | 0        | 0        | 0        | 0        | 0        | 0        | 0        | 0        | 0        | 0        | 0        | 0        | 0        | 0        | 0        |
| Bergeyella                                              | 0        | 0        | 0        | 0        | 0        | 0        | 0        | 0        | 0        | 0        | 0        | 0        | 0        | 0        | 0        | 0        | 0        | 0        | 0        | 0        | 0        |
| Betaproteobacteria                                      | 0        | 0        | 3        | 0        | 0        | 0        | 0        | 0        | 0        | 0        | 0        | 0        | 0        | 0        | 0        | 0        | 0        | 0        | 0        | 0        | 0        |
| Blastococcus endophyticus                               | 0        | 0        | 0        | 0        | 0        | 0        | 0        | 0        | 0        | 0        | 0        | 0        | 0        | 0        | 0        | 0        | 0        | 0        | 0        | 0        | 0        |
| Brevibacterium                                          | 0        | 0        | 0        | 0        | 0        | 0        | 0        | 0        | 0        | 0        | 0        | 0        | 0        | 0        | 0        | 0        | 0        | 0        | 0        | 0        | 0        |
| Brevibacterium casei                                    | 0        | 0        | 0        | 0        | 0        | 0        | 0        | 0        | 0        | 0        | 0        | 0        | 0        | 0        | 0        | 0        | 0        | 0        | 0        | 0        | 0        |
| Brevibacterium ihuae                                    | 0        | 0        | 0        | 0        | 0        | 0        | 0        | 0        | 0        | 0        | 0        | 0        | 0        | 0        | 0        | 0        | 0        | 0        | 0        | 0        | 0        |
| Brevundimonas                                           | 0        | 0        | 0        | 0        | 0        | 0        | 0        | 0        | 0        | 0        | 0        | 0        | 0        | 0        | 0        | 0        | 0        | 0        | 0        | 0        | 0        |
| Brevundimonas vesicularis                               | 0        | 0        | 0        | 0        | 0        | 0        | 0        | 0        | 0        | 0        | 0        | 0        | 0        | 0        | 0        | 0        | 0        | 0        | 0        | 0        | 0        |
| Brevundimonas/Caulobacter                               | 0        | 0        | 0        | 0        | 0        | 0        | 0        | 0        | 0        | 0        | 0        | 0        | 0        | 0        | 0        | 0        | 0        | 0        | 0        | 0        | 0        |
| Burkholderia pyrrocinia/stabilis                        | 0        | 0        | 0        | 0        | 0        | 0        | 0        | 0        | 0        | 0        | 0        | 0        | 0        | 0        | 0        | 0        | 0        | 0        | 0        | 0        | 0        |
| Burkholderiales Genera incertae sedis                   | 0        | 0        | 0        | 0        | 0        | 0        | 0        | 0        | 0        | 0        | 0        | 0        | 0        | 0        | 0        | 0        | 0        | 0        | 0        | 0        | 0        |
| Campylobacter rectus/showae                             | 0        | 0        | 0        | 0        | 0        | 0        | 0        | 0        | 0        | 0        | 0        | 0        | 0        | 0        | 0        | 0        | 0        | 0        | 0        | 0        | 0        |
| Candidatus Saccharibacteria                             | 0        | 0        | 0        | 0        | 0        | 0        | 0        | 0        | 0        | 0        | 0        | 0        | 0        | 0        | 0        | 0        | 0        | 0        | 0        | 0        | 0        |
| Candidatus Saccharimonas                                | 0        | 0        | 0        | 0        | 0        | 0        | 0        | 0        | 0        | 0        | 0        | 0        | 0        | 0        | 0        | 0        | 0        | 0        | 0        | 0        | 0        |
| Capnocytophaga                                          | 0        | 0        | 0        | 0        | 0        | 0        | 0        | 0        | 0        | 0        | 0        | 0        | 0        | 0        | 0        | 0        | 0        | 0        | 0        | 0        | 0        |
| Cardiobacterium hominis                                 | 0        | 0        | 0        | 0        | 0        | 0        | 0        | 0        | 0        | 0        | 0        | 0        | 0        | 0        | 0        | 0        | 0        | 0        | 0        | 0        | 0        |
| Carnobacteriaceae                                       | 0        | 0        | 0        | 0        | 0        | 0        | 0        | 0        | 0        | 0        | 0        | 0        | 0        | 0        | 0        | 0        | 0        | 0        | 0        | 0        | 0        |
| Carnobacterium inhibens/jeotgali                        | 0        | 0        | 0        | 0        | 0        | 0        | 0        | 0        | 0        | 0        | 0        | 0        | 0        | 0        | 0        | 0        | 0        | 0        | 0        | 0        | 0        |
| Casaltella massiliensis                                 | 0        | 0        | 0        | 0        | 0        | 0        | 0        | 0        | 0        | 0        | 0        | 0        | 0        | 0        | 0        | 0        | 0        | 0        | 0        | 0        | 0        |
| Chelatococcus asaccharovorans                           | 0        | 0        | 0        | 0        | 0        | 0        | 0        | 0        | 0        | 0        | 0        | 0        | 0        | 0        | 0        | 0        | 0        | 0        | 0        | 0        | 0        |
| Chelatococcus/Methylobacterium                          | 0        | 0        | 0        | 0        | 0        | 0        | 0        | 0        | 0        | 0        | 0        | 0        | 0        | 0        | 0        | 0        | 0        | 0        | 0        | 0        | 0        |
| Chryseobacterium                                        | 0        | 0        | 0        | 0        | 0        | 0        | 0        | 0        | 0        | 0        | 0        | 0        | 0        | 0        | 0        | 0        | 0        | 0        | 0        | 0        | 0        |
| Chryseobacterium hominis                                | 0        | 0        | 0        | 0        | 0        | 0        | 0        | 0        | 0        | 0        | 0        | 0        | 0        | 0        | 0        | 0        | 0        | 0        | 0        | 0        | 0        |
| Chryseomicrobium amylolyticum                           | 0        | 0        | 0        | 0        | 0        | 0        | 0        | 0        | 0        | 0        | 0        | 0        | 0        | 0        | 0        | 0        | 0        | 0        | 0        | 0        | 0        |
| Cloacibacterium normanense                              | 0        | 0        | 0        | 0        | 0        | 0        | 0        | 0        | 0        | 0        | 0        | 0        | 0        | 0        | 0        | 0        | 0        | 0        | 0        | 0        | 0        |
| Clostridium                                             | 0        | 0        | 0        | 0        | 0        | 0        | 0        | 0        | 0        | 0        | 0        | 0        | 0        | 0        | 0        | 0        | 0        | 0        | 0        | 0        | 0        |
| Corynebacteriales                                       | 0        | 0        | 0        | 0        | 0        | 0        | 0        | 0        | 0        | 0        | 0        | 0        | 0        | 0        | 0        | 0        | 0        | 0        | 0        | 0        | 0        |
| Corynebacterium                                         | 0        | 0        | 0        | 0        | 0        | 0        | 0        | 0        | 0        | 0        | 0        | 0        | 0        | 0        | 0        | 0        | 0        | 0        | 0        | 0        | 0        |
| Corynebacterium accolens/macginleyi                     | 0        | 0        | 0        | 0        | 0        | 0        | 0        | 0        | 0        | 0        | 0        | 0        | 0        | 0        | 0        | 0        | 0        | 0        | 0        | 0        | 0        |
| Corynebacterium appendicis                              | 0        | 0        | 0        | 0        | 0        | 0        | 0        | 0        | 0        | 0        | 0        | 0        | 0        | 0        | 0        | 0        | 0        | 0        | 0        | 0        | 0        |
| Corynebacterium aurimucosum/minutissimum/singulare      | 0        | 0        | 0        | 0        | 0        | 0        | 0        | 0        | 0        | 0        | 0        | 0        | 0        | 0        | 0        | 0        | 0        | 0        | 0        | 0        | 0        |
| Corynebacterium coyleae                                 | 0        | 0        | 0        | 0        | 0        | 0        | 0        | 0        | 0        | 0        | 0        | 0        | 0        | 0        | 0        | 0        | 0        | 0        | 0        | 0        | 0        |
| Corynebacterium fournierii/mucifaciens/ureicelerivorans | 0        | 0        | 0        | 0        | 0        | 0        | 0        | 0        | 0        | 0        | 0        | 0        | 0        | 0        | 0        | 0        | 0        | 0        | 0        | 0        | 0        |
| Corynebacterium hadale/imitans                          | 0        | 0        | 0        | 0        | 0        | 0        | 0        | 0        | 0        | 0        | 0        | 0        | 0        | 0        | 0        | 0        | 0        | 0        | 0        | 0        | 0        |
| Corynebacterium pollutisoli                             | 0        | 0        | 0        | 0        | 0        | 0        | 0        | 0        | 0        | 0        | 0        | 0        | 0        | 0        | 0        | 0        | 0        | 0        | 0        | 0        | 0        |
| Corynebacterium propinquum/pseudodiphtheriticum         | 0        | 0        | 0        | 0        | 0        | 0        | 0        | 0        | 0        | 0        | 0        | 0        | 0        | 0        | 0        | 0        | 0        | 0        | 0        | 0        | 0        |
| Corynebacterium pseudogenitalium/tuberculoostearicum    | 0        | 0        | 0        | 3        | 0        | 0        | 0        | 0        | 0        | 0        | 0        | 0        | 0        | 0        | 0        | 0        | 0        | 0        | 0        | 0        | 0        |
| Craurococcus roseus                                     | 0        | 0        | 0        | 0        | 0        | 0        | 0        | 0        | 0        | 0        | 0        | 0        | 0        | 0        | 0        | 0        | 0        | 0        | 0        | 0        | 0        |
| Curvibacter                                             | 0        | 0        | 0        | 0        | 0        | 0        | 0        | 0        | 0        | 0        | 0        | 0        | 0        | 0        | 0        | 0        | 0        | 0        | 0        | 0        | 0        |



# Water\_22 - Water\_42

| Species                                                               | water_22 | water_23 | water_24 | water_25 | water_26 | water_27 | water_28 | water_29 | water_30 | water_31 | water_32 | water_33 | water_34 | water_35 | water_36 | water_37 | water_38 | water_39 | water_40 | water_41 | water_42 |
|-----------------------------------------------------------------------|----------|----------|----------|----------|----------|----------|----------|----------|----------|----------|----------|----------|----------|----------|----------|----------|----------|----------|----------|----------|----------|
| Noviherbaspirillum                                                    | 0        | 0        | 0        | 0        | 0        | 0        | 0        | 0        | 0        | 0        | 0        | 0        | 0        | 0        | 0        | 0        | 0        | 0        | 0        | 0        | 0        |
| Novosphingobium pentaromativorans/resinovorum                         | 0        | 0        | 0        | 0        | 0        | 10       | 0        | 0        | 0        | 0        | 0        | 0        | 0        | 0        | 0        | 0        | 0        | 0        | 0        | 0        | 0        |
| Paenibacillus                                                         | 0        | 0        | 0        | 0        | 0        | 0        | 0        | 0        | 0        | 0        | 0        | 0        | 0        | 0        | 0        | 0        | 0        | 0        | 0        | 0        | 0        |
| Pantoea agglomerans/dispersa                                          | 0        | 0        | 0        | 0        | 0        | 0        | 0        | 0        | 0        | 0        | 0        | 0        | 0        | 0        | 0        | 0        | 0        | 0        | 0        | 0        | 0        |
| Pantoea stewartii                                                     | 0        | 0        | 0        | 0        | 0        | 0        | 0        | 0        | 0        | 0        | 0        | 0        | 0        | 0        | 0        | 0        | 0        | 0        | 0        | 0        | 0        |
| Paracoccus                                                            | 0        | 0        | 0        | 0        | 0        | 0        | 0        | 0        | 0        | 0        | 0        | 0        | 0        | 0        | 0        | 0        | 0        | 0        | 0        | 0        | 0        |
| Peptoniphilus asaccharolyticus/grossensis/harei/phoceensis/rhinitidis | 0        | 0        | 0        | 0        | 0        | 0        | 0        | 0        | 0        | 0        | 0        | 0        | 0        | 0        | 0        | 0        | 0        | 0        | 0        | 0        | 0        |
| Phycoccus                                                             | 0        | 0        | 0        | 0        | 0        | 0        | 0        | 0        | 0        | 0        | 0        | 0        | 0        | 0        | 0        | 0        | 0        | 0        | 0        | 0        | 0        |
| Pontibacter                                                           | 0        | 0        | 0        | 0        | 0        | 0        | 0        | 0        | 0        | 0        | 0        | 0        | 0        | 0        | 0        | 0        | 0        | 0        | 0        | 0        | 0        |
| Porphyromonas                                                         | 0        | 0        | 0        | 6        | 0        | 0        | 0        | 0        | 0        | 0        | 0        | 0        | 0        | 0        | 0        | 0        | 0        | 0        | 0        | 0        | 0        |
| Prevotella                                                            | 0        | 0        | 0        | 0        | 0        | 0        | 22       | 0        | 0        | 0        | 0        | 0        | 0        | 0        | 0        | 0        | 0        | 0        | 5        | 0        | 0        |
| Prevotella amnii                                                      | 0        | 0        | 0        | 0        | 0        | 0        | 0        | 0        | 0        | 0        | 0        | 0        | 0        | 0        | 0        | 0        | 0        | 0        | 0        | 0        | 0        |
| Prevotella disiens                                                    | 0        | 0        | 0        | 0        | 0        | 0        | 0        | 0        | 0        | 0        | 0        | 0        | 0        | 0        | 0        | 0        | 0        | 0        | 0        | 0        | 0        |
| Prevotella melaninogenica                                             | 0        | 0        | 0        | 0        | 0        | 0        | 0        | 0        | 0        | 0        | 0        | 0        | 0        | 0        | 0        | 0        | 0        | 0        | 0        | 0        | 0        |
| Prevotella timonensis                                                 | 0        | 0        | 0        | 0        | 0        | 0        | 0        | 0        | 0        | 0        | 0        | 0        | 0        | 0        | 0        | 0        | 0        | 0        | 0        | 0        | 0        |
| Pseudoclavibacter                                                     | 0        | 0        | 0        | 0        | 0        | 0        | 0        | 0        | 0        | 0        | 0        | 0        | 0        | 0        | 0        | 0        | 0        | 0        | 0        | 0        | 0        |
| Pseudomonas antarctica/fluorescens                                    | 0        | 0        | 0        | 0        | 0        | 0        | 0        | 0        | 0        | 0        | 0        | 0        | 0        | 0        | 0        | 0        | 0        | 0        | 0        | 0        | 0        |
| Pseudomonas baetica                                                   | 0        | 0        | 0        | 0        | 0        | 0        | 0        | 0        | 0        | 0        | 0        | 0        | 0        | 0        | 0        | 0        | 0        | 0        | 0        | 0        | 0        |
| Pseudomonas fluorescens/koreensis                                     | 0        | 0        | 0        | 0        | 0        | 0        | 0        | 0        | 0        | 0        | 0        | 0        | 0        | 0        | 0        | 0        | 0        | 0        | 0        | 0        | 0        |
| Pseudomonas gessardii                                                 | 0        | 0        | 0        | 0        | 0        | 0        | 0        | 0        | 0        | 0        | 0        | 0        | 0        | 0        | 0        | 0        | 0        | 0        | 0        | 0        | 0        |
| Pseudomonas monteilii                                                 | 0        | 0        | 0        | 0        | 0        | 0        | 0        | 0        | 0        | 0        | 0        | 0        | 0        | 0        | 0        | 0        | 0        | 0        | 0        | 0        | 0        |
| Pseudomonas oleovorans/pseudoalcaligenes group                        | 0        | 0        | 0        | 0        | 0        | 0        | 0        | 0        | 0        | 0        | 0        | 0        | 0        | 0        | 0        | 0        | 0        | 0        | 0        | 0        | 0        |
| Pseudomonas resinovorans                                              | 0        | 0        | 0        | 0        | 0        | 0        | 0        | 0        | 0        | 0        | 0        | 0        | 0        | 0        | 0        | 0        | 0        | 0        | 0        | 0        | 0        |
| Pseudomonas stutzeri group                                            | 0        | 0        | 0        | 0        | 0        | 0        | 0        | 0        | 0        | 0        | 0        | 0        | 0        | 0        | 0        | 0        | 0        | 0        | 0        | 0        | 0        |
| Pseudomonas stutzeri subgroup                                         | 0        | 0        | 0        | 0        | 0        | 0        | 0        | 0        | 0        | 0        | 0        | 0        | 0        | 0        | 0        | 0        | 0        | 0        | 0        | 0        | 0        |
| Pseudomonas veronii                                                   | 0        | 0        | 0        | 0        | 0        | 0        | 0        | 0        | 0        | 0        | 0        | 0        | 0        | 0        | 0        | 0        | 0        | 0        | 0        | 0        | 0        |
| Pseudoxanthomonas indica                                              | 0        | 0        | 0        | 0        | 0        | 0        | 0        | 0        | 0        | 0        | 0        | 0        | 0        | 0        | 0        | 0        | 0        | 0        | 0        | 0        | 0        |
| Pseudoxanthomonas mexicana                                            | 0        | 0        | 0        | 0        | 0        | 0        | 0        | 0        | 0        | 0        | 0        | 0        | 0        | 0        | 0        | 0        | 0        | 0        | 0        | 0        | 0        |
| Psychrobacter alimentarius                                            | 0        | 0        | 0        | 0        | 0        | 0        | 0        | 0        | 0        | 0        | 0        | 0        | 0        | 0        | 0        | 0        | 0        | 0        | 0        | 0        | 0        |
| Rheinheimera                                                          | 0        | 0        | 0        | 0        | 0        | 0        | 0        | 0        | 0        | 0        | 0        | 0        | 0        | 0        | 0        | 0        | 0        | 0        | 0        | 0        | 0        |
| Rheinheimera perlucida                                                | 0        | 0        | 0        | 0        | 0        | 0        | 0        | 0        | 0        | 0        | 0        | 0        | 0        | 0        | 0        | 0        | 0        | 0        | 0        | 0        | 0        |
| Rhodobacter                                                           | 0        | 0        | 0        | 0        | 0        | 0        | 0        | 0        | 0        | 0        | 0        | 0        | 0        | 0        | 0        | 0        | 0        | 0        | 0        | 0        | 0        |
| Rhodobacteraceae                                                      | 0        | 0        | 0        | 0        | 0        | 0        | 0        | 0        | 0        | 0        | 0        | 0        | 0        | 0        | 0        | 0        | 0        | 0        | 0        | 0        | 0        |
| Rhodococcus corynebacterioides/kroppenstedtii                         | 0        | 0        | 0        | 0        | 0        | 0        | 0        | 0        | 0        | 0        | 0        | 0        | 0        | 0        | 0        | 0        | 0        | 0        | 0        | 0        | 0        |
| Romboutsia timonensis                                                 | 0        | 0        | 0        | 0        | 0        | 0        | 0        | 0        | 0        | 0        | 0        | 0        | 0        | 0        | 0        | 0        | 0        | 0        | 0        | 0        | 0        |
| Rothia                                                                | 0        | 0        | 0        | 0        | 0        | 0        | 0        | 0        | 0        | 0        | 0        | 0        | 0        | 0        | 0        | 0        | 0        | 0        | 0        | 0        | 0        |
| Rothia amarae                                                         | 0        | 0        | 0        | 0        | 0        | 0        | 0        | 0        | 0        | 0        | 0        | 0        | 0        | 0        | 0        | 0        | 0        | 0        | 0        | 0        | 0        |
| Saccharopolyspora                                                     | 0        | 0        | 0        | 0        | 0        | 0        | 0        | 0        | 0        | 0        | 0        | 0        | 0        | 0        | 0        | 0        | 0        | 0        | 0        | 0        | 0        |
| Shigella/Escherichia                                                  | 15       | 0        | 0        | 0        | 0        | 0        | 0        | 0        | 0        | 0        | 0        | 0        | 0        | 0        | 0        | 9        | 0        | 0        | 8        | 0        | 0        |
| Sneathia                                                              | 0        | 0        | 0        | 0        | 0        | 0        | 0        | 0        | 0        | 0        | 0        | 0        | 0        | 0        | 0        | 0        | 0        | 0        | 0        | 0        | 0        |
| Sneathia amnii                                                        | 0        | 0        | 0        | 0        | 0        | 0        | 0        | 0        | 0        | 0        | 0        | 0        | 0        | 0        | 0        | 0        | 0        | 0        | 0        | 0        | 0        |
| Sneathia sanguinigena                                                 | 0        | 0        | 0        | 2        | 0        | 0        | 0        | 0        | 0        | 0        | 0        | 0        | 0        | 0        | 0        | 0        | 0        | 0        | 0        | 0        | 0        |
| Sphingobium yanoikuyae                                                | 0        | 0        | 0        | 0        | 0        | 0        | 0        | 0        | 0        | 0        | 0        | 3        | 0        | 0        | 0        | 0        | 0        | 0        | 0        | 0        | 0        |
| Sphingomonas kaistensis                                               | 0        | 0        | 0        | 0        | 0        | 0        | 0        | 0        | 0        | 0        | 0        | 0        | 0        | 0        | 0        | 0        | 0        | 0        | 0        | 0        | 0        |
| Sphingomonas starnbergensis                                           | 0        | 0        | 0        | 0        | 0        | 0        | 0        | 0        | 0        | 0        | 0        | 0        | 0        | 0        | 0        | 0        | 0        | 0        | 0        | 0        | 0        |
| Staphylococcus aureus                                                 | 0        | 0        | 0        | 0        | 0        | 0        | 0        | 0        | 0        | 0        | 0        | 0        | 0        | 0        | 0        | 0        | 0        | 0        | 0        | 0        | 0        |
| Staphylococcus capitis/caprae                                         | 0        | 0        | 0        | 0        | 0        | 0        | 0        | 0        | 0        | 0        | 0        | 0        | 0        | 0        | 0        | 0        | 0        | 0        | 0        | 0        | 0        |
| Staphylococcus caprae/cohnii/epidermidis                              | 0        | 0        | 0        | 0        | 0        | 0        | 0        | 10       | 0        | 0        | 0        | 0        | 0        | 0        | 0        | 0        | 0        | 0        | 0        | 0        | 0        |
| Staphylococcus cohnii/saprophyticus                                   | 0        | 0        | 0        | 0        | 0        | 0        | 0        | 0        | 0        | 0        | 0        | 0        | 0        | 0        | 0        | 0        | 0        | 0        | 0        | 0        | 0        |
| Staphylococcus epidermidis/hominis                                    | 0        | 0        | 0        | 0        | 0        | 0        | 0        | 0        | 0        | 0        | 0        | 0        | 0        | 0        | 0        | 0        | 0        | 0        | 0        | 0        | 0        |
| Staphylococcus equorum/saprophyticus/xylosus                          | 0        | 0        | 0        | 0        | 0        | 0        | 0        | 0        | 0        | 0        | 0        | 0        | 0        | 0        | 0        | 0        | 0        | 0        | 0        | 0        | 0        |
| Staphylococcus haemolyticus                                           | 0        | 0        | 0        | 0        | 0        | 0        | 0        | 0        | 0        | 0        | 0        | 0        | 0        | 0        | 0        | 0        | 0        | 0        | 0        | 0        | 0        |
| Streptococcus                                                         | 0        | 0        | 0        | 0        | 0        | 0        | 0        | 0        | 0        | 0        | 0        | 0        | 0        | 0        | 0        | 0        | 0        | 0        | 0        | 0        | 0        |
| Streptococcus agalactiae                                              | 0        | 0        | 0        | 0        | 0        | 0        | 0        | 0        | 0        | 0        | 0        | 0        | 0        | 0        | 0        | 0        | 0        | 0        | 0        | 0        | 0        |
| Streptococcus anginosus                                               | 0        | 0        | 0        | 0        | 0        | 0        | 0        | 0        | 0        | 0        | 0        | 0        | 0        | 0        | 0        | 0        | 0        | 0        | 0        | 0        | 0        |
| Streptococcus mitis group                                             | 0        | 0        | 0        | 0        | 9        | 6        | 23       | 23       | 0        | 51       | 30       | 25       | 14       | 27       | 22       | 0        | 19       | 31       | 0        | 27       | 24       |
| Thiopseudomonas                                                       | 0        | 0        | 0        | 0        | 0        | 0        | 0        | 0        | 0        | 0        | 0        | 0        | 0        | 0        | 0        | 0        | 0        | 0        | 0        | 0        | 0        |
| Turicella otitidis                                                    | 0        | 0        | 0        | 0        | 0        | 0        | 0        | 0        | 0        | 0        | 0        | 0        | 0        | 0        | 0        | 0        | 0        | 0        | 0        | 0        | 0        |
| unclassified Clostridiales                                            | 0        | 0        | 0        | 0        | 0        | 0        | 0        | 0        | 0        | 0        | 0        | 0        | 0        | 0        | 0        | 0        | 0        | 0        | 0        | 0        | 0        |
| Undibacterium                                                         | 0        | 0        | 0        | 0        | 0        | 0        | 0        | 0        | 0        | 0        | 0        | 0        | 0        | 0        | 0        | 0        | 0        | 0        | 0        | 0        | 0        |
| Variovorax gossypii                                                   | 0        | 0        | 0        | 0        | 0        | 0        | 0        | 0        | 0        | 0        | 0        | 0        | 0        | 0        | 0        | 0        | 0        | 0        | 0        | 0        | 0        |
| Veillonella                                                           | 0        | 0        | 0        | 0        | 0        | 0        | 0        | 0        | 0        | 0        | 0        | 0        | 0        | 0        | 0        | 0        | 0        | 0        | 0        | 0        | 0        |
| Veillonella dispar/parvula                                            | 0        | 0        | 0        | 0        | 0        | 0        | 0        | 0        | 0        | 0        | 0        | 0        | 0        | 0        | 0        | 0        | 0        | 0        | 0        | 0        | 0        |
| Veillonella montpellierensis                                          | 0        | 0        | 0        | 0        | 0        | 0        | 0        | 0        | 0        | 0        | 0        | 0        | 0        | 0        | 0        | 0        | 0        | 0        | 0        | 0        | 0        |
| Williamsia faeni/muralis                                              | 0        | 0        | 0        | 0        | 0        | 0        | 0        | 0        | 0        | 0        | 0        | 0        | 0        | 0        | 0        | 0        | 0        | 0        | 0        | 0        | 0        |
| Zoogloea resiniphila                                                  | 0        | 0        | 0        | 0        | 0        | 0        | 0        | 0        | 0        | 0        | 0        | 0        | 0        | 0        | 0        | 0        | 0        | 0        | 0        | 0        | 0        |

# Water\_43 - Water\_63

| Species                                                 | water_43 | water_44 | water_45 | water_46 | water_47 | water_48 | water_49 | water_50 | water_51 | water_52 | water_53 | water_54 | water_55 | water_56 | water_57 | water_58 | water_59 | water_60 | water_61 | water_62 | water_63 |
|---------------------------------------------------------|----------|----------|----------|----------|----------|----------|----------|----------|----------|----------|----------|----------|----------|----------|----------|----------|----------|----------|----------|----------|----------|
| [Clostridium] hiranonis                                 | 0        | 0        | 0        | 0        | 0        | 0        | 0        | 0        | 0        | 0        | 0        | 0        | 0        | 0        | 0        | 0        | 0        | 0        | 0        | 0        | 0        |
| Acidovorax/Undibacterium                                | 0        | 0        | 0        | 0        | 0        | 0        | 0        | 0        | 0        | 0        | 0        | 0        | 0        | 0        | 0        | 0        | 0        | 0        | 0        | 0        | 0        |
| Acinetobacter haemolyticus/johnsonii                    | 0        | 0        | 0        | 0        | 0        | 6        | 3        | 0        | 0        | 0        | 0        | 0        | 0        | 0        | 0        | 0        | 0        | 0        | 0        | 0        | 0        |
| Acinetobacter haemolyticus/schindleri                   | 0        | 0        | 0        | 0        | 0        | 0        | 0        | 0        | 0        | 0        | 0        | 0        | 0        | 0        | 0        | 0        | 0        | 0        | 0        | 0        | 0        |
| Acinetobacter parvus                                    | 0        | 0        | 0        | 0        | 0        | 0        | 0        | 0        | 0        | 0        | 0        | 0        | 0        | 0        | 0        | 0        | 0        | 0        | 0        | 0        | 0        |
| Acinetobacter proteolyticus                             | 0        | 0        | 0        | 0        | 0        | 0        | 0        | 0        | 0        | 0        | 0        | 0        | 0        | 0        | 0        | 0        | 0        | 0        | 0        | 0        | 0        |
| Acinetobacter schindleri                                | 0        | 0        | 0        | 0        | 0        | 0        | 0        | 0        | 0        | 0        | 0        | 0        | 0        | 0        | 0        | 0        | 0        | 0        | 0        | 0        | 0        |
| Actinomyces oris/viscosus                               | 0        | 0        | 0        | 0        | 0        | 0        | 0        | 0        | 0        | 0        | 0        | 0        | 0        | 0        | 0        | 0        | 0        | 0        | 0        | 0        | 0        |
| Aerococcus urinaeequi/viridans                          | 0        | 0        | 0        | 0        | 0        | 0        | 0        | 0        | 0        | 0        | 0        | 0        | 0        | 0        | 0        | 0        | 0        | 0        | 0        | 0        | 0        |
| Aeromonas caviae                                        | 0        | 0        | 0        | 0        | 0        | 0        | 0        | 0        | 0        | 0        | 0        | 0        | 0        | 0        | 0        | 0        | 0        | 0        | 0        | 0        | 0        |
| Aeromonas veronii                                       | 0        | 0        | 0        | 0        | 0        | 0        | 0        | 0        | 0        | 0        | 0        | 0        | 0        | 0        | 0        | 0        | 0        | 0        | 0        | 0        | 0        |
| Afipia                                                  | 0        | 0        | 0        | 0        | 0        | 0        | 0        | 0        | 0        | 0        | 0        | 0        | 0        | 0        | 0        | 0        | 0        | 0        | 0        | 0        | 0        |
| Aggregatibacter aphrophilus                             | 0        | 0        | 0        | 0        | 0        | 0        | 0        | 0        | 0        | 0        | 0        | 0        | 0        | 0        | 0        | 0        | 0        | 0        | 0        | 0        | 0        |
| Alishewanella                                           | 0        | 0        | 0        | 0        | 0        | 0        | 0        | 0        | 0        | 0        | 0        | 0        | 0        | 0        | 0        | 0        | 0        | 0        | 0        | 0        | 0        |
| Alloiooccus                                             | 0        | 0        | 0        | 0        | 0        | 0        | 0        | 0        | 0        | 0        | 0        | 0        | 0        | 0        | 0        | 0        | 0        | 0        | 0        | 0        | 0        |
| Altererythrobacter epoxidivorans                        | 0        | 0        | 0        | 0        | 0        | 0        | 0        | 0        | 0        | 0        | 0        | 0        | 0        | 0        | 0        | 0        | 0        | 0        | 0        | 0        | 0        |
| Anaerococcus                                            | 0        | 0        | 0        | 0        | 0        | 0        | 0        | 0        | 0        | 0        | 0        | 0        | 0        | 0        | 0        | 0        | 0        | 0        | 0        | 0        | 0        |
| Anaerococcus lactolyticus                               | 0        | 0        | 0        | 0        | 0        | 0        | 0        | 0        | 0        | 0        | 0        | 0        | 0        | 0        | 0        | 0        | 0        | 0        | 0        | 0        | 0        |
| Anaerococcus octavius                                   | 0        | 0        | 0        | 0        | 0        | 0        | 0        | 0        | 0        | 0        | 0        | 0        | 0        | 0        | 0        | 0        | 0        | 0        | 0        | 0        | 0        |
| Anaerococcus prevotii/tetradius                         | 0        | 0        | 0        | 0        | 0        | 0        | 0        | 0        | 0        | 0        | 0        | 0        | 0        | 0        | 0        | 0        | 0        | 0        | 0        | 0        | 0        |
| Anaeromyxobacter                                        | 0        | 0        | 0        | 0        | 0        | 0        | 0        | 0        | 0        | 0        | 0        | 0        | 0        | 0        | 0        | 0        | 0        | 0        | 0        | 0        | 0        |
| Arenimonas                                              | 0        | 0        | 0        | 0        | 0        | 0        | 0        | 0        | 0        | 0        | 0        | 0        | 0        | 0        | 0        | 0        | 0        | 0        | 0        | 0        | 0        |
| Atopobium vaginae                                       | 0        | 0        | 0        | 0        | 0        | 0        | 0        | 0        | 0        | 0        | 0        | 0        | 0        | 0        | 0        | 0        | 0        | 0        | 0        | 0        | 0        |
| Bacillaceae                                             | 0        | 0        | 0        | 0        | 0        | 0        | 0        | 0        | 0        | 0        | 0        | 0        | 0        | 0        | 0        | 0        | 0        | 0        | 0        | 0        | 0        |
| Bacillus dakarensis                                     | 0        | 0        | 0        | 0        | 0        | 0        | 0        | 0        | 0        | 0        | 0        | 0        | 0        | 0        | 0        | 0        | 0        | 0        | 0        | 0        | 0        |
| Bacillus foraminis                                      | 0        | 0        | 0        | 0        | 0        | 0        | 0        | 0        | 0        | 0        | 0        | 0        | 0        | 0        | 0        | 0        | 0        | 0        | 0        | 0        | 0        |
| Bacillus idriensis                                      | 0        | 0        | 0        | 0        | 0        | 0        | 0        | 0        | 0        | 0        | 0        | 0        | 0        | 0        | 0        | 0        | 0        | 0        | 0        | 0        | 0        |
| Bacillus malikii                                        | 0        | 0        | 0        | 0        | 0        | 0        | 0        | 0        | 0        | 0        | 0        | 0        | 0        | 0        | 0        | 0        | 0        | 0        | 0        | 0        | 0        |
| Bacteroidales                                           | 0        | 0        | 0        | 0        | 0        | 0        | 0        | 0        | 0        | 0        | 0        | 0        | 0        | 0        | 0        | 0        | 0        | 0        | 0        | 0        | 0        |
| Bergeyella                                              | 0        | 0        | 0        | 0        | 0        | 0        | 0        | 0        | 0        | 0        | 0        | 0        | 0        | 0        | 0        | 0        | 0        | 0        | 0        | 0        | 0        |
| Betaproteobacteria                                      | 0        | 0        | 0        | 0        | 0        | 0        | 0        | 0        | 0        | 0        | 0        | 0        | 0        | 0        | 0        | 0        | 0        | 0        | 0        | 0        | 0        |
| Blastococcus endophyticus                               | 0        | 0        | 0        | 0        | 0        | 0        | 0        | 0        | 0        | 0        | 0        | 0        | 0        | 0        | 0        | 0        | 0        | 0        | 0        | 0        | 0        |
| Brevibacterium                                          | 0        | 0        | 0        | 0        | 0        | 0        | 0        | 0        | 0        | 0        | 7        | 0        | 0        | 0        | 0        | 0        | 0        | 0        | 0        | 0        | 0        |
| Brevibacterium casei                                    | 0        | 0        | 0        | 0        | 0        | 0        | 0        | 0        | 0        | 0        | 0        | 0        | 0        | 0        | 0        | 0        | 0        | 0        | 0        | 0        | 0        |
| Brevibacterium ihuae                                    | 0        | 0        | 0        | 0        | 0        | 0        | 0        | 0        | 0        | 0        | 0        | 0        | 0        | 0        | 0        | 0        | 0        | 0        | 0        | 0        | 0        |
| Brevundimonas                                           | 0        | 0        | 0        | 0        | 0        | 0        | 0        | 0        | 0        | 0        | 0        | 0        | 0        | 0        | 0        | 0        | 0        | 0        | 0        | 0        | 0        |
| Brevundimonas vesicularis                               | 0        | 0        | 0        | 0        | 0        | 0        | 0        | 0        | 0        | 0        | 0        | 0        | 0        | 0        | 0        | 0        | 0        | 0        | 0        | 0        | 0        |
| Brevundimonas/Caulobacter                               | 0        | 0        | 0        | 0        | 0        | 0        | 0        | 0        | 0        | 0        | 0        | 0        | 0        | 0        | 0        | 0        | 0        | 0        | 0        | 0        | 0        |
| Burkholderia pyrrocinia/stabilis                        | 0        | 0        | 0        | 0        | 0        | 0        | 0        | 0        | 0        | 0        | 0        | 0        | 0        | 0        | 0        | 0        | 0        | 0        | 0        | 0        | 0        |
| Burkholderiales Genera incertae sedis                   | 0        | 0        | 0        | 0        | 0        | 0        | 0        | 0        | 0        | 0        | 0        | 0        | 0        | 0        | 0        | 0        | 0        | 0        | 0        | 0        | 0        |
| Campylobacter rectus/showae                             | 0        | 0        | 0        | 0        | 0        | 0        | 0        | 0        | 0        | 0        | 0        | 0        | 0        | 0        | 0        | 0        | 0        | 0        | 0        | 0        | 0        |
| Candidatus Saccharibacteria                             | 0        | 0        | 0        | 0        | 0        | 0        | 0        | 0        | 0        | 0        | 0        | 0        | 0        | 0        | 0        | 0        | 0        | 0        | 0        | 0        | 0        |
| Candidatus Saccharimonas                                | 0        | 0        | 0        | 0        | 0        | 0        | 0        | 0        | 0        | 0        | 0        | 0        | 0        | 0        | 0        | 0        | 0        | 0        | 0        | 0        | 0        |
| Capnocytophaga                                          | 0        | 0        | 0        | 0        | 0        | 0        | 0        | 0        | 0        | 0        | 0        | 0        | 0        | 0        | 0        | 0        | 0        | 0        | 0        | 0        | 0        |
| Cardiobacterium hominis                                 | 0        | 0        | 0        | 0        | 0        | 0        | 0        | 0        | 0        | 0        | 0        | 0        | 0        | 0        | 0        | 0        | 0        | 0        | 0        | 0        | 0        |
| Carnobacteriaceae                                       | 0        | 0        | 0        | 0        | 0        | 0        | 0        | 0        | 0        | 0        | 0        | 0        | 0        | 0        | 0        | 0        | 0        | 0        | 0        | 0        | 0        |
| Carnobacterium inhibens/jeotgali                        | 0        | 0        | 0        | 0        | 0        | 0        | 0        | 0        | 0        | 0        | 0        | 0        | 0        | 0        | 0        | 0        | 0        | 0        | 0        | 0        | 0        |
| Casaltella massiliensis                                 | 0        | 0        | 0        | 0        | 0        | 0        | 0        | 0        | 0        | 0        | 0        | 0        | 0        | 0        | 0        | 0        | 0        | 0        | 0        | 0        | 0        |
| Chelatococcus asaccharovorans                           | 0        | 0        | 0        | 0        | 0        | 0        | 0        | 0        | 0        | 0        | 0        | 0        | 0        | 0        | 0        | 0        | 0        | 0        | 0        | 0        | 0        |
| Chelatococcus/Methylobacterium                          | 0        | 0        | 0        | 0        | 0        | 0        | 0        | 0        | 0        | 0        | 0        | 0        | 0        | 0        | 0        | 0        | 0        | 0        | 0        | 0        | 0        |
| Chryseobacterium                                        | 0        | 0        | 0        | 0        | 0        | 0        | 0        | 0        | 0        | 0        | 0        | 0        | 0        | 0        | 0        | 0        | 0        | 0        | 0        | 0        | 0        |
| Chryseobacterium hominis                                | 0        | 0        | 0        | 0        | 0        | 0        | 0        | 0        | 0        | 0        | 0        | 0        | 0        | 0        | 0        | 0        | 0        | 0        | 0        | 0        | 0        |
| Chryseomicrobium amylolyticum                           | 0        | 0        | 0        | 0        | 0        | 0        | 0        | 0        | 0        | 0        | 0        | 0        | 0        | 0        | 0        | 0        | 0        | 0        | 0        | 0        | 0        |
| Cloacibacterium normanense                              | 0        | 0        | 0        | 5        | 0        | 0        | 0        | 0        | 0        | 0        | 0        | 0        | 0        | 0        | 0        | 0        | 0        | 0        | 0        | 0        | 0        |
| Clostridium                                             | 0        | 0        | 0        | 0        | 0        | 0        | 0        | 0        | 0        | 0        | 0        | 0        | 0        | 0        | 0        | 0        | 0        | 0        | 0        | 0        | 0        |
| Corynebacteriales                                       | 0        | 0        | 0        | 0        | 0        | 0        | 0        | 0        | 0        | 0        | 0        | 0        | 0        | 0        | 0        | 0        | 0        | 0        | 0        | 0        | 0        |
| Corynebacterium                                         | 0        | 0        | 0        | 0        | 0        | 0        | 0        | 0        | 0        | 0        | 0        | 0        | 0        | 0        | 0        | 0        | 0        | 0        | 0        | 0        | 0        |
| Corynebacterium accolens/macginleyi                     | 0        | 0        | 0        | 0        | 0        | 0        | 0        | 0        | 0        | 0        | 0        | 0        | 0        | 0        | 0        | 0        | 0        | 0        | 0        | 0        | 0        |
| Corynebacterium appendicis                              | 0        | 0        | 0        | 0        | 0        | 0        | 0        | 0        | 0        | 0        | 0        | 0        | 0        | 0        | 0        | 0        | 0        | 0        | 0        | 0        | 0        |
| Corynebacterium aurimucosum/minutissimum/singulare      | 0        | 0        | 0        | 0        | 0        | 0        | 0        | 0        | 0        | 0        | 0        | 0        | 0        | 0        | 0        | 0        | 0        | 0        | 0        | 0        | 0        |
| Corynebacterium coyleae                                 | 0        | 0        | 0        | 0        | 0        | 0        | 0        | 0        | 0        | 0        | 0        | 0        | 0        | 0        | 0        | 0        | 0        | 0        | 0        | 0        | 0        |
| Corynebacterium fournierii/mucifaciens/ureicelerivorans | 0        | 0        | 0        | 0        | 0        | 0        | 0        | 0        | 0        | 0        | 0        | 0        | 0        | 0        | 0        | 0        | 0        | 0        | 0        | 0        | 0        |
| Corynebacterium hadale/imitans                          | 0        | 0        | 0        | 0        | 0        | 0        | 0        | 0        | 0        | 0        | 0        | 0        | 0        | 0        | 0        | 0        | 0        | 0        | 0        | 0        | 0        |
| Corynebacterium pollutisoli                             | 0        | 0        | 0        | 0        | 0        | 0        | 0        | 0        | 0        | 0        | 0        | 0        | 0        | 0        | 0        | 0        | 0        | 0        | 0        | 0        | 0        |
| Corynebacterium propinquum/pseudodiphtheriticum         | 0        | 0        | 0        | 0        | 0        | 0        | 0        | 0        | 0        | 0        | 0        | 0        | 0        | 0        | 0        | 0        | 0        | 0        | 0        | 0        | 0        |
| Corynebacterium pseudogenitalium/tuberculostearicum     | 0        | 0        | 0        | 0        | 0        | 0        | 0        | 0        | 0        | 0        | 0        | 0        | 0        | 0        | 0        | 0        | 0        | 0        | 0        | 0        | 0        |
| Craurococcus roseus                                     | 0        | 0        | 0        | 0        | 0        | 0        | 0        | 0        | 0        | 0        | 0        | 0        | 0        | 0        | 0        | 0        | 0        | 0        | 0        | 0        | 0        |
| Curvibacter                                             | 0        | 0        | 0        | 0        | 0        | 0        | 0        | 0        | 0        | 0        | 0        | 0        | 0        | 0        | 0        | 0        | 0        | 0        | 7        | 0        | 0        |

# Water\_43 - Water\_63

| Species                                       | water_43 | water_44 | water_45 | water_46 | water_47 | water_48 | water_49 | water_50 | water_51 | water_52 | water_53 | water_54 | water_55 | water_56 | water_57 | water_58 | water_59 | water_60 | water_61 | water_62 | water_63 |
|-----------------------------------------------|----------|----------|----------|----------|----------|----------|----------|----------|----------|----------|----------|----------|----------|----------|----------|----------|----------|----------|----------|----------|----------|
| Curvibacter gracilis                          | 0        | 0        | 0        | 0        | 0        | 0        | 0        | 0        | 0        | 0        | 0        | 0        | 0        | 0        | 0        | 0        | 0        | 0        | 0        | 0        | 0        |
| Cutibacterium acnes                           | 0        | 0        | 0        | 0        | 0        | 0        | 0        | 0        | 0        | 0        | 0        | 0        | 0        | 0        | 0        | 0        | 0        | 0        | 0        | 0        | 0        |
| Cutibacterium avidum                          | 0        | 0        | 0        | 0        | 0        | 0        | 0        | 0        | 0        | 0        | 0        | 0        | 0        | 0        | 0        | 0        | 0        | 0        | 0        | 0        | 0        |
| Cyanobacteria                                 | 0        | 0        | 0        | 0        | 0        | 0        | 0        | 0        | 0        | 0        | 0        | 0        | 0        | 0        | 0        | 0        | 0        | 0        | 0        | 0        | 0        |
| Cyclobacterium lianum                         | 0        | 0        | 0        | 0        | 0        | 0        | 0        | 0        | 0        | 0        | 0        | 0        | 0        | 0        | 0        | 0        | 0        | 0        | 0        | 0        | 0        |
| Deinococcus                                   | 0        | 0        | 0        | 0        | 0        | 0        | 0        | 0        | 0        | 0        | 0        | 0        | 0        | 3        | 0        | 0        | 0        | 0        | 0        | 0        | 0        |
| Devosia chinhatensis                          | 0        | 0        | 0        | 0        | 0        | 0        | 0        | 0        | 0        | 0        | 0        | 0        | 0        | 0        | 0        | 0        | 0        | 0        | 0        | 0        | 0        |
| Dialister sp. type 2                          | 0        | 0        | 0        | 0        | 0        | 0        | 0        | 0        | 0        | 0        | 0        | 0        | 0        | 0        | 0        | 0        | 0        | 0        | 0        | 0        | 0        |
| Eikenella                                     | 0        | 0        | 0        | 0        | 0        | 0        | 0        | 0        | 0        | 0        | 0        | 0        | 0        | 0        | 0        | 0        | 0        | 0        | 0        | 0        | 0        |
| Enterobacter cloacae complex                  | 0        | 0        | 0        | 0        | 0        | 0        | 0        | 0        | 0        | 0        | 0        | 0        | 0        | 0        | 0        | 0        | 0        | 0        | 0        | 0        | 0        |
| Enterococcus                                  | 0        | 0        | 0        | 0        | 0        | 0        | 0        | 0        | 0        | 0        | 0        | 0        | 0        | 0        | 0        | 0        | 0        | 0        | 0        | 0        | 0        |
| Erysipelotrichaceae                           | 0        | 0        | 0        | 0        | 0        | 0        | 0        | 0        | 0        | 0        | 0        | 0        | 0        | 0        | 0        | 0        | 0        | 0        | 0        | 0        | 0        |
| Erythrobacter citreus                         | 0        | 0        | 0        | 0        | 0        | 0        | 0        | 0        | 0        | 0        | 0        | 0        | 0        | 0        | 0        | 0        | 0        | 0        | 0        | 0        | 0        |
| Ezakiella                                     | 0        | 0        | 0        | 0        | 0        | 0        | 0        | 0        | 0        | 0        | 0        | 0        | 0        | 0        | 0        | 0        | 0        | 0        | 0        | 0        | 0        |
| Filifactor aloisii                            | 0        | 0        | 0        | 0        | 0        | 0        | 0        | 0        | 0        | 0        | 0        | 0        | 0        | 0        | 0        | 0        | 0        | 0        | 0        | 0        | 0        |
| Finegoldia magna                              | 0        | 0        | 0        | 0        | 0        | 0        | 0        | 0        | 0        | 0        | 0        | 0        | 0        | 0        | 0        | 0        | 0        | 0        | 0        | 0        | 0        |
| Flavobacterium aquaticum                      | 0        | 0        | 0        | 0        | 0        | 0        | 0        | 0        | 0        | 0        | 0        | 0        | 0        | 0        | 0        | 0        | 0        | 0        | 0        | 0        | 0        |
| Fusobacterium nucleatum                       | 0        | 0        | 0        | 0        | 0        | 0        | 0        | 0        | 0        | 0        | 0        | 0        | 0        | 0        | 0        | 0        | 0        | 0        | 0        | 0        | 0        |
| Gardnerella vaginalis                         | 0        | 0        | 0        | 0        | 0        | 0        | 0        | 0        | 0        | 0        | 0        | 0        | 0        | 0        | 0        | 7        | 0        | 0        | 0        | 0        | 0        |
| Gemella haemolysans/taiwanensis               | 0        | 0        | 0        | 0        | 0        | 0        | 0        | 0        | 0        | 0        | 0        | 0        | 0        | 0        | 0        | 0        | 0        | 0        | 0        | 0        | 0        |
| Gemella sanguinis                             | 0        | 0        | 0        | 0        | 0        | 0        | 0        | 0        | 0        | 0        | 0        | 0        | 0        | 0        | 0        | 0        | 0        | 0        | 0        | 0        | 0        |
| Gemmatimonas                                  | 0        | 0        | 0        | 0        | 0        | 0        | 0        | 0        | 0        | 0        | 0        | 0        | 0        | 0        | 0        | 0        | 0        | 0        | 0        | 0        | 0        |
| Gemmobacter                                   | 0        | 0        | 0        | 0        | 0        | 0        | 0        | 0        | 0        | 0        | 0        | 0        | 0        | 0        | 0        | 0        | 0        | 0        | 0        | 0        | 0        |
| Globicatella sulfidifaciens                   | 0        | 0        | 0        | 0        | 0        | 0        | 0        | 0        | 0        | 0        | 0        | 0        | 0        | 0        | 0        | 0        | 0        | 0        | 0        | 0        | 0        |
| Gordonia terrae                               | 0        | 0        | 0        | 0        | 0        | 0        | 0        | 0        | 0        | 0        | 0        | 0        | 0        | 0        | 0        | 0        | 0        | 0        | 0        | 0        | 0        |
| Granulicatella adiacens                       | 0        | 0        | 0        | 0        | 0        | 0        | 0        | 0        | 0        | 0        | 0        | 0        | 0        | 0        | 0        | 0        | 0        | 0        | 0        | 0        | 0        |
| Haemophilus haemolyticus/quentini             | 0        | 0        | 0        | 5        | 0        | 0        | 0        | 0        | 0        | 0        | 0        | 0        | 0        | 0        | 0        | 0        | 0        | 0        | 0        | 0        | 0        |
| Haemophilus influenzae                        | 0        | 0        | 0        | 0        | 0        | 0        | 0        | 0        | 0        | 0        | 0        | 0        | 0        | 0        | 0        | 0        | 0        | 0        | 0        | 0        | 0        |
| Haemophilus parahaemolyticus                  | 0        | 0        | 0        | 0        | 0        | 0        | 0        | 0        | 0        | 0        | 0        | 0        | 0        | 0        | 0        | 0        | 0        | 0        | 0        | 0        | 0        |
| Haemophilus parainfluenzae                    | 0        | 0        | 0        | 0        | 0        | 0        | 0        | 0        | 0        | 0        | 0        | 0        | 0        | 0        | 0        | 0        | 0        | 0        | 0        | 0        | 0        |
| Halomonas xinjiangensis                       | 0        | 0        | 0        | 0        | 0        | 0        | 0        | 0        | 0        | 0        | 0        | 0        | 0        | 0        | 0        | 0        | 0        | 0        | 0        | 0        | 0        |
| Helicobacter                                  | 0        | 0        | 0        | 0        | 0        | 0        | 0        | 0        | 0        | 0        | 0        | 0        | 0        | 0        | 0        | 0        | 0        | 0        | 0        | 0        | 0        |
| Holdemanella                                  | 0        | 0        | 0        | 0        | 0        | 0        | 0        | 0        | 0        | 0        | 0        | 0        | 0        | 0        | 0        | 0        | 0        | 0        | 0        | 0        | 0        |
| Inhella inkyongensis                          | 0        | 0        | 0        | 0        | 0        | 0        | 0        | 0        | 0        | 0        | 0        | 0        | 0        | 0        | 0        | 0        | 0        | 0        | 0        | 0        | 0        |
| Janibacter                                    | 0        | 0        | 0        | 0        | 0        | 0        | 0        | 0        | 0        | 0        | 0        | 0        | 0        | 0        | 0        | 0        | 0        | 0        | 0        | 0        | 0        |
| Kingella                                      | 0        | 0        | 0        | 0        | 0        | 0        | 0        | 0        | 0        | 0        | 0        | 0        | 0        | 0        | 0        | 0        | 0        | 0        | 0        | 0        | 0        |
| Klebsiella pneumoniae/varicola                | 0        | 0        | 0        | 0        | 0        | 0        | 0        | 0        | 0        | 0        | 0        | 0        | 0        | 0        | 0        | 0        | 0        | 0        | 0        | 0        | 0        |
| Kocuria kristinae                             | 0        | 0        | 0        | 0        | 0        | 0        | 0        | 0        | 0        | 0        | 0        | 0        | 0        | 0        | 0        | 0        | 0        | 0        | 0        | 0        | 0        |
| Kocuria rosea/turfanensis                     | 0        | 0        | 0        | 0        | 0        | 0        | 0        | 0        | 0        | 0        | 0        | 0        | 0        | 0        | 0        | 0        | 0        | 0        | 0        | 0        | 0        |
| Kocuria turfanensis                           | 0        | 0        | 0        | 0        | 0        | 0        | 0        | 0        | 0        | 0        | 0        | 0        | 0        | 0        | 0        | 0        | 0        | 0        | 0        | 0        | 0        |
| Kurthia gibsonii                              | 0        | 0        | 0        | 0        | 0        | 0        | 0        | 0        | 0        | 0        | 0        | 0        | 0        | 0        | 0        | 0        | 0        | 0        | 0        | 0        | 0        |
| Lactobacillales                               | 0        | 0        | 0        | 0        | 0        | 0        | 0        | 0        | 0        | 0        | 0        | 0        | 0        | 0        | 0        | 0        | 0        | 0        | 0        | 0        | 0        |
| Lactobacillus                                 | 0        | 0        | 0        | 0        | 0        | 0        | 0        | 0        | 0        | 0        | 0        | 0        | 0        | 0        | 0        | 0        | 0        | 0        | 0        | 0        | 0        |
| Lactobacillus helveticus                      | 0        | 0        | 0        | 0        | 0        | 0        | 0        | 0        | 0        | 0        | 0        | 0        | 0        | 0        | 0        | 0        | 0        | 0        | 0        | 0        | 0        |
| Lactobacillus iners                           | 0        | 0        | 0        | 0        | 6        | 0        | 0        | 0        | 0        | 0        | 0        | 0        | 0        | 0        | 0        | 0        | 0        | 0        | 0        | 0        | 0        |
| Lactococcus lactis                            | 0        | 0        | 0        | 0        | 0        | 0        | 0        | 0        | 0        | 0        | 0        | 0        | 0        | 0        | 0        | 0        | 0        | 0        | 0        | 0        | 0        |
| Lagierella massiliensis                       | 0        | 0        | 0        | 0        | 0        | 0        | 0        | 0        | 0        | 0        | 0        | 0        | 0        | 0        | 0        | 0        | 0        | 0        | 0        | 0        | 0        |
| Lawsonella clevelandensis                     | 0        | 0        | 0        | 0        | 0        | 0        | 0        | 0        | 0        | 0        | 0        | 0        | 0        | 0        | 0        | 7        | 0        | 0        | 0        | 0        | 0        |
| Leifsonia aquatica/shinshuensis               | 0        | 0        | 0        | 0        | 0        | 0        | 0        | 0        | 0        | 0        | 0        | 0        | 0        | 0        | 0        | 0        | 0        | 0        | 0        | 0        | 0        |
| Leptotrichia                                  | 0        | 0        | 0        | 0        | 0        | 0        | 0        | 0        | 0        | 0        | 0        | 0        | 0        | 0        | 0        | 0        | 0        | 0        | 0        | 0        | 0        |
| Leptotrichia hofstadii                        | 0        | 0        | 0        | 0        | 0        | 0        | 0        | 0        | 0        | 0        | 0        | 0        | 0        | 0        | 0        | 0        | 0        | 0        | 0        | 0        | 0        |
| Leptotrichia shahii                           | 0        | 0        | 0        | 0        | 0        | 0        | 0        | 0        | 0        | 0        | 0        | 0        | 0        | 0        | 0        | 0        | 0        | 0        | 0        | 0        | 0        |
| Macrocococcus                                 | 0        | 0        | 0        | 0        | 0        | 0        | 0        | 0        | 0        | 0        | 0        | 0        | 0        | 0        | 0        | 0        | 0        | 0        | 0        | 0        | 0        |
| Massilia                                      | 0        | 0        | 0        | 0        | 0        | 0        | 0        | 0        | 0        | 12       | 0        | 0        | 0        | 0        | 0        | 0        | 0        | 0        | 0        | 0        | 0        |
| Massilia haematophila                         | 0        | 0        | 0        | 0        | 0        | 0        | 0        | 0        | 0        | 0        | 0        | 0        | 0        | 0        | 0        | 0        | 0        | 0        | 0        | 0        | 0        |
| Mesorhizobium                                 | 0        | 0        | 0        | 0        | 0        | 0        | 0        | 0        | 0        | 0        | 0        | 0        | 0        | 0        | 0        | 0        | 0        | 0        | 0        | 0        | 0        |
| Methylobacterium radiotolerans                | 0        | 0        | 0        | 0        | 0        | 0        | 0        | 0        | 0        | 0        | 0        | 0        | 0        | 0        | 0        | 0        | 0        | 0        | 0        | 0        | 0        |
| Microbacterium                                | 0        | 0        | 0        | 0        | 0        | 0        | 0        | 0        | 0        | 0        | 0        | 0        | 0        | 0        | 0        | 0        | 0        | 0        | 0        | 0        | 0        |
| Microbacterium arborescens                    | 0        | 0        | 0        | 0        | 0        | 0        | 0        | 0        | 0        | 0        | 0        | 0        | 0        | 0        | 0        | 0        | 0        | 0        | 0        | 0        | 0        |
| Micrococcus lylae                             | 0        | 0        | 0        | 0        | 0        | 0        | 0        | 0        | 0        | 0        | 0        | 0        | 0        | 0        | 0        | 0        | 0        | 0        | 0        | 0        | 0        |
| Mycobacterium chelonae complex                | 0        | 0        | 0        | 0        | 0        | 0        | 0        | 0        | 0        | 0        | 0        | 0        | 0        | 0        | 0        | 0        | 0        | 0        | 0        | 0        | 0        |
| Mycobacterium gordonae                        | 0        | 0        | 0        | 0        | 0        | 0        | 0        | 0        | 0        | 0        | 0        | 0        | 0        | 0        | 0        | 0        | 0        | 0        | 0        | 0        | 0        |
| Mycoplasma genitalium                         | 0        | 0        | 0        | 0        | 0        | 0        | 0        | 0        | 0        | 0        | 0        | 0        | 0        | 0        | 0        | 0        | 0        | 0        | 0        | 0        | 0        |
| Mycoplasma penetrans                          | 0        | 0        | 0        | 0        | 0        | 0        | 0        | 0        | 0        | 0        | 0        | 0        | 0        | 0        | 0        | 0        | 0        | 0        | 0        | 0        | 0        |
| Neisseria bacilliformis                       | 0        | 0        | 0        | 0        | 0        | 0        | 0        | 0        | 0        | 0        | 0        | 0        | 0        | 0        | 0        | 0        | 0        | 0        | 0        | 0        | 0        |
| Neisseria flavescens/mucosa/perflava/subflava | 0        | 0        | 0        | 0        | 0        | 0        | 0        | 0        | 0        | 0        | 0        | 0        | 0        | 0        | 0        | 0        | 0        | 0        | 0        | 0        | 0        |
| Nesterenkonia lacusekhoensis                  | 0        | 0        | 0        | 0        | 0        | 0        | 0        | 0        | 0        | 0        | 0        | 0        | 0        | 0        | 0        | 0        | 0        | 0        | 0        | 0        | 0        |
| Nocardiopsis salina                           | 0        | 0        | 0        | 0        | 0        | 0        | 0        | 0        | 0        | 0        | 0        | 0        | 0        | 0        | 0        | 0        | 0        | 0        | 0        | 0        | 0        |

# Water\_43 - Water\_63

| Species                                                               | water_43 | water_44 | water_45 | water_46 | water_47 | water_48 | water_49 | water_50 | water_51 | water_52 | water_53 | water_54 | water_55 | water_56 | water_57 | water_58 | water_59 | water_60 | water_61 | water_62 | water_63 |
|-----------------------------------------------------------------------|----------|----------|----------|----------|----------|----------|----------|----------|----------|----------|----------|----------|----------|----------|----------|----------|----------|----------|----------|----------|----------|
| Noviherbaspirillum                                                    | 0        | 0        | 0        | 0        | 0        | 0        | 0        | 0        | 0        | 0        | 0        | 0        | 0        | 0        | 0        | 0        | 0        | 0        | 0        | 0        | 0        |
| Novosphingobium pentaromativorans/resinovorum                         | 0        | 0        | 0        | 0        | 0        | 0        | 0        | 0        | 0        | 0        | 0        | 0        | 0        | 0        | 0        | 0        | 0        | 0        | 0        | 0        | 0        |
| Paenibacillus                                                         | 0        | 0        | 0        | 0        | 0        | 0        | 0        | 0        | 0        | 0        | 0        | 0        | 0        | 0        | 0        | 0        | 0        | 0        | 0        | 0        | 0        |
| Pantoea agglomerans/dispersa                                          | 0        | 0        | 0        | 0        | 0        | 0        | 0        | 0        | 0        | 0        | 0        | 0        | 0        | 0        | 0        | 0        | 0        | 0        | 0        | 0        | 0        |
| Pantoea stewartii                                                     | 0        | 0        | 0        | 0        | 0        | 0        | 0        | 0        | 0        | 0        | 0        | 0        | 0        | 0        | 0        | 0        | 0        | 0        | 0        | 0        | 0        |
| Paracoccus                                                            | 0        | 0        | 0        | 0        | 0        | 0        | 0        | 0        | 0        | 0        | 0        | 0        | 0        | 0        | 0        | 0        | 0        | 0        | 0        | 0        | 0        |
| Peptoniphilus asaccharolyticus/grossensis/harei/phoceensis/rhinitidis | 0        | 0        | 0        | 0        | 0        | 0        | 0        | 0        | 0        | 0        | 0        | 0        | 0        | 0        | 0        | 0        | 0        | 0        | 0        | 0        | 0        |
| Phycoccus                                                             | 0        | 0        | 0        | 0        | 0        | 0        | 0        | 0        | 0        | 0        | 0        | 0        | 0        | 0        | 0        | 0        | 0        | 0        | 0        | 0        | 0        |
| Pontibacter                                                           | 0        | 0        | 0        | 0        | 0        | 0        | 0        | 0        | 0        | 0        | 0        | 0        | 0        | 0        | 0        | 0        | 0        | 0        | 0        | 0        | 0        |
| Porphyromonas                                                         | 0        | 0        | 0        | 0        | 0        | 0        | 0        | 0        | 0        | 0        | 0        | 0        | 0        | 0        | 0        | 0        | 0        | 0        | 0        | 0        | 0        |
| Prevotella                                                            | 0        | 0        | 0        | 0        | 0        | 0        | 0        | 0        | 0        | 0        | 0        | 0        | 0        | 0        | 0        | 0        | 2        | 0        | 0        | 0        | 0        |
| Prevotella amnii                                                      | 0        | 0        | 0        | 0        | 0        | 0        | 0        | 0        | 0        | 0        | 0        | 0        | 0        | 0        | 0        | 0        | 0        | 0        | 0        | 0        | 0        |
| Prevotella disiens                                                    | 0        | 0        | 0        | 0        | 0        | 0        | 0        | 0        | 0        | 0        | 0        | 0        | 0        | 0        | 0        | 0        | 0        | 0        | 0        | 0        | 0        |
| Prevotella melaninogenica                                             | 0        | 0        | 0        | 0        | 0        | 0        | 0        | 0        | 0        | 0        | 0        | 0        | 0        | 0        | 0        | 0        | 0        | 0        | 0        | 0        | 0        |
| Prevotella timonensis                                                 | 0        | 0        | 0        | 0        | 0        | 0        | 0        | 0        | 0        | 0        | 0        | 0        | 0        | 0        | 0        | 0        | 0        | 0        | 0        | 0        | 0        |
| Pseudoclavibacter                                                     | 0        | 0        | 0        | 0        | 0        | 0        | 0        | 0        | 0        | 0        | 0        | 0        | 0        | 0        | 0        | 0        | 0        | 0        | 0        | 0        | 0        |
| Pseudomonas antarctica/fluorescens                                    | 0        | 0        | 0        | 0        | 0        | 0        | 0        | 0        | 0        | 0        | 0        | 0        | 0        | 0        | 0        | 0        | 18       | 0        | 0        | 0        | 0        |
| Pseudomonas baetica                                                   | 0        | 0        | 0        | 0        | 0        | 0        | 0        | 0        | 0        | 0        | 0        | 0        | 0        | 0        | 0        | 0        | 0        | 0        | 0        | 0        | 0        |
| Pseudomonas fluorescens/koreensis                                     | 0        | 0        | 0        | 0        | 0        | 0        | 0        | 0        | 0        | 0        | 0        | 0        | 0        | 0        | 0        | 0        | 0        | 0        | 0        | 0        | 0        |
| Pseudomonas gessardii                                                 | 0        | 0        | 0        | 0        | 0        | 0        | 0        | 0        | 0        | 0        | 0        | 0        | 0        | 0        | 0        | 0        | 0        | 0        | 0        | 0        | 0        |
| Pseudomonas monteilii                                                 | 0        | 0        | 0        | 0        | 0        | 0        | 0        | 0        | 0        | 0        | 0        | 0        | 0        | 0        | 0        | 0        | 0        | 0        | 0        | 0        | 0        |
| Pseudomonas oleovorans/pseudoalcaligenes group                        | 0        | 0        | 0        | 0        | 0        | 0        | 0        | 0        | 0        | 0        | 0        | 0        | 0        | 0        | 0        | 0        | 0        | 0        | 0        | 0        | 0        |
| Pseudomonas resinovorans                                              | 0        | 0        | 0        | 0        | 0        | 0        | 0        | 0        | 0        | 0        | 0        | 0        | 0        | 0        | 0        | 0        | 0        | 0        | 0        | 0        | 0        |
| Pseudomonas stutzeri group                                            | 0        | 0        | 0        | 0        | 0        | 0        | 0        | 0        | 0        | 0        | 0        | 0        | 0        | 0        | 0        | 0        | 0        | 0        | 0        | 0        | 0        |
| Pseudomonas stutzeri subgroup                                         | 0        | 0        | 0        | 0        | 0        | 0        | 0        | 0        | 0        | 0        | 0        | 0        | 0        | 0        | 0        | 0        | 0        | 0        | 0        | 0        | 0        |
| Pseudomonas veronii                                                   | 0        | 0        | 0        | 0        | 0        | 0        | 0        | 0        | 0        | 0        | 0        | 0        | 0        | 0        | 0        | 0        | 0        | 0        | 0        | 0        | 0        |
| Pseudoxanthomonas indica                                              | 0        | 0        | 0        | 0        | 0        | 0        | 0        | 0        | 0        | 0        | 0        | 0        | 0        | 0        | 0        | 0        | 0        | 0        | 0        | 0        | 0        |
| Pseudoxanthomonas mexicana                                            | 0        | 0        | 0        | 0        | 0        | 0        | 0        | 0        | 0        | 0        | 0        | 0        | 0        | 0        | 0        | 0        | 0        | 0        | 0        | 0        | 0        |
| Psychrobacter alimentarius                                            | 0        | 0        | 0        | 0        | 0        | 0        | 0        | 0        | 0        | 0        | 0        | 0        | 0        | 0        | 0        | 0        | 0        | 0        | 0        | 0        | 0        |
| Rheinheimera                                                          | 0        | 0        | 0        | 0        | 0        | 0        | 0        | 0        | 0        | 0        | 0        | 0        | 0        | 0        | 0        | 0        | 0        | 0        | 0        | 0        | 0        |
| Rheinheimera perlucida                                                | 0        | 0        | 0        | 0        | 0        | 0        | 0        | 0        | 0        | 0        | 0        | 0        | 0        | 0        | 0        | 0        | 0        | 0        | 0        | 0        | 0        |
| Rhodobacter                                                           | 0        | 0        | 0        | 0        | 0        | 0        | 0        | 0        | 0        | 0        | 0        | 0        | 0        | 0        | 0        | 0        | 0        | 0        | 0        | 0        | 0        |
| Rhodobacteraceae                                                      | 0        | 0        | 0        | 0        | 0        | 0        | 0        | 0        | 0        | 0        | 0        | 0        | 0        | 0        | 0        | 0        | 0        | 0        | 0        | 0        | 0        |
| Rhodococcus corynebacterioides/kroppenstedtii                         | 0        | 0        | 0        | 0        | 0        | 0        | 0        | 0        | 0        | 0        | 0        | 0        | 0        | 0        | 0        | 0        | 0        | 0        | 0        | 0        | 0        |
| Romboutsia timonensis                                                 | 0        | 0        | 0        | 0        | 0        | 0        | 0        | 0        | 0        | 0        | 0        | 0        | 0        | 0        | 0        | 0        | 0        | 0        | 0        | 0        | 0        |
| Rothia                                                                | 0        | 0        | 0        | 0        | 0        | 0        | 0        | 0        | 0        | 0        | 0        | 0        | 0        | 0        | 0        | 0        | 0        | 0        | 0        | 0        | 0        |
| Rothia amarae                                                         | 0        | 0        | 0        | 0        | 0        | 0        | 0        | 0        | 0        | 0        | 0        | 0        | 0        | 0        | 0        | 0        | 0        | 0        | 0        | 0        | 0        |
| Saccharopolyspora                                                     | 0        | 0        | 0        | 0        | 0        | 0        | 0        | 0        | 0        | 0        | 0        | 0        | 0        | 0        | 0        | 0        | 0        | 0        | 0        | 0        | 0        |
| Shigella/Escherichia                                                  | 0        | 0        | 0        | 0        | 0        | 0        | 0        | 0        | 20       | 20       | 101      | 55       | 19       | 36       | 33       | 68       | 26       | 29       | 16       | 111      | 0        |
| Sneathia                                                              | 0        | 0        | 0        | 0        | 0        | 0        | 0        | 0        | 0        | 0        | 0        | 0        | 0        | 0        | 0        | 0        | 0        | 0        | 0        | 0        | 0        |
| Sneathia amnii                                                        | 0        | 0        | 0        | 0        | 0        | 0        | 0        | 0        | 0        | 0        | 0        | 0        | 0        | 0        | 0        | 0        | 0        | 0        | 0        | 0        | 0        |
| Sneathia sanguinigena                                                 | 0        | 0        | 0        | 0        | 0        | 0        | 0        | 0        | 0        | 0        | 0        | 0        | 0        | 0        | 0        | 0        | 0        | 0        | 0        | 0        | 0        |
| Sphingobium yanoikuyae                                                | 0        | 0        | 0        | 0        | 0        | 0        | 0        | 0        | 0        | 0        | 0        | 0        | 0        | 0        | 0        | 0        | 0        | 0        | 0        | 0        | 0        |
| Sphingomonas kaistensis                                               | 0        | 0        | 0        | 0        | 0        | 0        | 0        | 0        | 0        | 0        | 0        | 0        | 0        | 0        | 0        | 0        | 0        | 0        | 0        | 0        | 0        |
| Sphingomonas starnbergensis                                           | 0        | 0        | 0        | 0        | 0        | 0        | 0        | 0        | 0        | 0        | 0        | 0        | 0        | 0        | 0        | 0        | 0        | 0        | 0        | 0        | 0        |
| Staphylococcus aureus                                                 | 0        | 0        | 0        | 8        | 0        | 0        | 0        | 0        | 0        | 0        | 0        | 0        | 0        | 0        | 0        | 0        | 0        | 0        | 0        | 0        | 0        |
| Staphylococcus capitis/caprae                                         | 0        | 0        | 0        | 0        | 0        | 0        | 0        | 0        | 0        | 0        | 0        | 0        | 0        | 0        | 0        | 0        | 0        | 0        | 0        | 0        | 0        |
| Staphylococcus caprae/cohnii/epidermidis                              | 0        | 0        | 0        | 0        | 0        | 0        | 0        | 0        | 0        | 0        | 0        | 0        | 0        | 0        | 0        | 0        | 0        | 0        | 0        | 0        | 0        |
| Staphylococcus cohnii/saprophyticus                                   | 0        | 0        | 0        | 0        | 0        | 0        | 0        | 0        | 0        | 0        | 0        | 0        | 0        | 0        | 0        | 0        | 0        | 0        | 0        | 0        | 0        |
| Staphylococcus epidermidis/hominis                                    | 0        | 0        | 0        | 0        | 0        | 0        | 0        | 0        | 0        | 0        | 0        | 0        | 0        | 0        | 0        | 0        | 0        | 0        | 0        | 0        | 0        |
| Staphylococcus equorum/saprophyticus/xylosus                          | 0        | 0        | 0        | 0        | 0        | 0        | 0        | 0        | 0        | 0        | 0        | 0        | 0        | 0        | 0        | 0        | 0        | 0        | 0        | 0        | 0        |
| Staphylococcus haemolyticus                                           | 0        | 0        | 0        | 0        | 0        | 0        | 0        | 0        | 0        | 0        | 0        | 0        | 0        | 0        | 0        | 0        | 0        | 0        | 0        | 0        | 0        |
| Streptococcus                                                         | 0        | 0        | 0        | 0        | 0        | 0        | 0        | 0        | 0        | 0        | 0        | 0        | 0        | 0        | 0        | 0        | 0        | 0        | 0        | 0        | 0        |
| Streptococcus agalactiae                                              | 0        | 0        | 0        | 0        | 0        | 0        | 0        | 0        | 0        | 0        | 0        | 0        | 0        | 0        | 0        | 0        | 0        | 0        | 0        | 0        | 0        |
| Streptococcus anginosus                                               | 0        | 0        | 0        | 0        | 0        | 0        | 0        | 0        | 0        | 0        | 0        | 0        | 0        | 0        | 0        | 0        | 0        | 0        | 0        | 0        | 0        |
| Streptococcus mitis group                                             | 12       | 25       | 28       | 0        | 0        | 0        | 20       | 28       | 26       | 19       | 15       | 0        | 0        | 6        | 18       | 23       | 7        | 7        | 0        | 8        | 5        |
| Thiopseudomonas                                                       | 0        | 0        | 0        | 0        | 0        | 0        | 0        | 0        | 0        | 0        | 0        | 0        | 0        | 0        | 0        | 0        | 0        | 0        | 0        | 0        | 0        |
| Turicella otitidis                                                    | 0        | 0        | 0        | 0        | 0        | 0        | 0        | 0        | 0        | 0        | 0        | 0        | 0        | 0        | 0        | 0        | 0        | 0        | 0        | 0        | 0        |
| unclassified Clostridiales                                            | 0        | 0        | 0        | 0        | 0        | 0        | 0        | 0        | 0        | 0        | 0        | 0        | 0        | 0        | 0        | 0        | 0        | 0        | 0        | 0        | 0        |
| Undibacterium                                                         | 0        | 0        | 0        | 0        | 0        | 0        | 0        | 0        | 0        | 0        | 0        | 0        | 0        | 0        | 0        | 0        | 0        | 0        | 0        | 0        | 0        |
| Variovorax gossypii                                                   | 0        | 0        | 0        | 0        | 0        | 0        | 0        | 0        | 0        | 0        | 0        | 0        | 0        | 0        | 0        | 0        | 0        | 0        | 0        | 0        | 0        |
| Veillonella                                                           | 0        | 0        | 0        | 0        | 0        | 0        | 0        | 0        | 0        | 0        | 0        | 0        | 0        | 0        | 0        | 0        | 0        | 0        | 6        | 0        | 0        |
| Veillonella dispar/parvula                                            | 0        | 0        | 0        | 0        | 0        | 0        | 0        | 0        | 0        | 0        | 0        | 0        | 0        | 0        | 0        | 0        | 0        | 0        | 0        | 0        | 0        |
| Veillonella montpellierensis                                          | 0        | 0        | 0        | 0        | 0        | 0        | 0        | 0        | 0        | 0        | 0        | 0        | 0        | 0        | 0        | 0        | 0        | 0        | 0        | 0        | 0        |
| Williamsia faeni/muralis                                              | 0        | 0        | 0        | 0        | 0        | 0        | 0        | 0        | 0        | 0        | 0        | 0        | 0        | 0        | 0        | 0        | 0        | 0        | 0        | 0        | 0        |
| Zoogloea resiniphila                                                  | 0        | 0        | 0        | 0        | 0        | 0        | 0        | 0        | 0        | 0        | 0        | 0        | 0        | 0        | 0        | 0        | 0        | 0        | 0        | 0        | 0        |

# Water\_64 - Water\_84

| Species                                                 | water_64 | water_65 | water_66 | water_67 | water_68 | water_69 | water_70 | water_71 | water_72 | water_73 | water_74 | water_75 | water_76 | water_77 | water_78 | water_79 | water_80 | water_81 | water_82 | water_83 | water_84 |
|---------------------------------------------------------|----------|----------|----------|----------|----------|----------|----------|----------|----------|----------|----------|----------|----------|----------|----------|----------|----------|----------|----------|----------|----------|
| [Clostridium] hiranonis                                 | 0        | 0        | 0        | 0        | 0        | 0        | 0        | 0        | 0        | 0        | 0        | 0        | 0        | 0        | 0        | 0        | 0        | 0        | 0        | 0        | 0        |
| Acidovorax/Undibacterium                                | 0        | 0        | 0        | 0        | 0        | 0        | 0        | 0        | 0        | 0        | 0        | 0        | 0        | 0        | 0        | 0        | 0        | 0        | 0        | 0        | 0        |
| Acinetobacter haemolyticus/johnsonii                    | 0        | 0        | 0        | 0        | 0        | 0        | 0        | 0        | 0        | 0        | 0        | 0        | 0        | 0        | 0        | 0        | 0        | 0        | 0        | 0        | 0        |
| Acinetobacter haemolyticus/schindleri                   | 0        | 0        | 0        | 0        | 0        | 0        | 0        | 0        | 0        | 0        | 0        | 0        | 0        | 0        | 0        | 0        | 0        | 0        | 0        | 0        | 0        |
| Acinetobacter parvus                                    | 0        | 0        | 0        | 0        | 0        | 0        | 0        | 0        | 0        | 0        | 0        | 0        | 0        | 0        | 0        | 0        | 0        | 0        | 0        | 0        | 0        |
| Acinetobacter proteolyticus                             | 0        | 0        | 0        | 0        | 0        | 0        | 0        | 0        | 0        | 0        | 0        | 0        | 0        | 0        | 0        | 0        | 0        | 0        | 0        | 0        | 0        |
| Acinetobacter schindleri                                | 0        | 0        | 0        | 0        | 0        | 0        | 0        | 0        | 0        | 0        | 0        | 0        | 0        | 0        | 0        | 0        | 0        | 0        | 0        | 0        | 0        |
| Actinomyces oris/viscosus                               | 0        | 0        | 0        | 0        | 0        | 0        | 0        | 0        | 0        | 0        | 0        | 0        | 0        | 0        | 0        | 0        | 0        | 0        | 0        | 0        | 0        |
| Aerococcus urinaeequi/viridans                          | 0        | 0        | 0        | 0        | 0        | 0        | 0        | 0        | 0        | 0        | 0        | 0        | 0        | 0        | 0        | 0        | 0        | 0        | 0        | 0        | 0        |
| Aeromonas caviae                                        | 0        | 0        | 0        | 0        | 0        | 0        | 0        | 0        | 0        | 0        | 0        | 0        | 0        | 0        | 0        | 0        | 0        | 0        | 0        | 0        | 0        |
| Aeromonas veronii                                       | 0        | 0        | 0        | 0        | 0        | 0        | 0        | 0        | 0        | 0        | 0        | 0        | 0        | 0        | 0        | 0        | 0        | 0        | 0        | 0        | 0        |
| Afipia                                                  | 0        | 0        | 0        | 0        | 0        | 0        | 0        | 0        | 0        | 0        | 0        | 0        | 0        | 0        | 0        | 0        | 0        | 0        | 0        | 0        | 0        |
| Aggregatibacter aphrophilus                             | 0        | 0        | 0        | 0        | 0        | 0        | 0        | 0        | 0        | 0        | 0        | 0        | 0        | 0        | 0        | 0        | 0        | 0        | 0        | 0        | 0        |
| Alishewanella                                           | 0        | 0        | 0        | 0        | 0        | 0        | 0        | 0        | 0        | 0        | 0        | 0        | 0        | 0        | 0        | 0        | 0        | 0        | 0        | 0        | 0        |
| Alloiooccus                                             | 0        | 0        | 0        | 0        | 0        | 0        | 0        | 0        | 0        | 0        | 0        | 0        | 0        | 0        | 0        | 0        | 0        | 0        | 0        | 0        | 0        |
| Altererythrobacter epoxidivorans                        | 0        | 0        | 0        | 0        | 0        | 0        | 0        | 0        | 0        | 0        | 0        | 0        | 0        | 0        | 0        | 0        | 0        | 0        | 0        | 0        | 0        |
| Anaerococcus                                            | 0        | 0        | 0        | 0        | 0        | 0        | 0        | 0        | 0        | 0        | 0        | 0        | 0        | 0        | 0        | 0        | 0        | 0        | 0        | 0        | 0        |
| Anaerococcus lactolyticus                               | 0        | 0        | 0        | 0        | 0        | 0        | 0        | 0        | 0        | 0        | 0        | 0        | 0        | 0        | 0        | 0        | 0        | 0        | 0        | 0        | 0        |
| Anaerococcus octavius                                   | 0        | 0        | 0        | 0        | 0        | 0        | 0        | 0        | 0        | 0        | 0        | 0        | 0        | 0        | 0        | 0        | 0        | 0        | 0        | 0        | 0        |
| Anaerococcus prevotii/tetradius                         | 0        | 0        | 0        | 0        | 0        | 0        | 0        | 0        | 0        | 0        | 0        | 0        | 0        | 0        | 0        | 0        | 0        | 0        | 0        | 0        | 0        |
| Anaeromyxobacter                                        | 0        | 0        | 0        | 0        | 0        | 0        | 0        | 0        | 0        | 0        | 0        | 0        | 0        | 0        | 0        | 0        | 0        | 0        | 0        | 0        | 0        |
| Arenimonas                                              | 0        | 0        | 0        | 0        | 0        | 0        | 0        | 0        | 0        | 0        | 0        | 0        | 0        | 0        | 0        | 0        | 0        | 0        | 0        | 0        | 0        |
| Atopobium vaginae                                       | 0        | 0        | 0        | 0        | 0        | 0        | 0        | 0        | 0        | 0        | 0        | 0        | 0        | 0        | 0        | 0        | 0        | 0        | 0        | 0        | 0        |
| Bacillaceae                                             | 0        | 0        | 0        | 0        | 0        | 0        | 0        | 0        | 0        | 0        | 0        | 0        | 0        | 0        | 0        | 0        | 0        | 0        | 0        | 5        | 0        |
| Bacillus dakarensis                                     | 0        | 0        | 0        | 0        | 0        | 0        | 0        | 0        | 0        | 0        | 0        | 0        | 0        | 0        | 0        | 0        | 0        | 0        | 0        | 0        | 0        |
| Bacillus foraminis                                      | 0        | 0        | 0        | 0        | 0        | 0        | 0        | 0        | 0        | 0        | 0        | 0        | 0        | 0        | 0        | 0        | 0        | 0        | 0        | 0        | 0        |
| Bacillus idriensis                                      | 0        | 0        | 0        | 0        | 0        | 0        | 10       | 8        | 9        | 47       | 10       | 0        | 4        | 6        | 18       | 0        | 0        | 0        | 0        | 0        | 0        |
| Bacillus malikii                                        | 0        | 0        | 0        | 0        | 0        | 0        | 0        | 0        | 0        | 0        | 0        | 0        | 0        | 0        | 0        | 0        | 0        | 0        | 0        | 0        | 0        |
| Bacteroidales                                           | 0        | 0        | 0        | 0        | 0        | 0        | 0        | 0        | 0        | 0        | 0        | 0        | 0        | 0        | 0        | 0        | 0        | 0        | 0        | 0        | 0        |
| Bergeyella                                              | 0        | 0        | 0        | 0        | 0        | 0        | 0        | 0        | 0        | 0        | 0        | 0        | 0        | 0        | 0        | 0        | 0        | 0        | 0        | 0        | 0        |
| Betaproteobacteria                                      | 0        | 0        | 0        | 0        | 0        | 0        | 0        | 0        | 0        | 0        | 0        | 0        | 0        | 0        | 0        | 0        | 0        | 0        | 0        | 0        | 0        |
| Blastococcus endophyticus                               | 0        | 0        | 0        | 0        | 0        | 0        | 0        | 0        | 0        | 0        | 0        | 0        | 0        | 0        | 0        | 0        | 0        | 0        | 0        | 0        | 0        |
| Brevibacterium                                          | 0        | 0        | 0        | 0        | 0        | 0        | 0        | 0        | 0        | 0        | 0        | 0        | 0        | 0        | 0        | 0        | 0        | 0        | 0        | 0        | 0        |
| Brevibacterium casei                                    | 0        | 0        | 0        | 0        | 0        | 0        | 0        | 0        | 0        | 0        | 0        | 0        | 0        | 0        | 0        | 0        | 0        | 0        | 0        | 0        | 0        |
| Brevibacterium ihuae                                    | 0        | 0        | 0        | 0        | 0        | 0        | 0        | 0        | 0        | 0        | 0        | 0        | 0        | 0        | 0        | 0        | 0        | 0        | 0        | 0        | 0        |
| Brevundimonas                                           | 0        | 0        | 0        | 0        | 0        | 0        | 0        | 0        | 0        | 0        | 0        | 0        | 0        | 0        | 0        | 0        | 0        | 0        | 0        | 0        | 0        |
| Brevundimonas vesicularis                               | 0        | 0        | 0        | 0        | 0        | 0        | 0        | 0        | 0        | 0        | 0        | 0        | 0        | 0        | 0        | 0        | 0        | 0        | 0        | 0        | 0        |
| Brevundimonas/Caulobacter                               | 0        | 0        | 0        | 0        | 0        | 0        | 0        | 0        | 0        | 0        | 0        | 0        | 0        | 0        | 0        | 0        | 0        | 0        | 0        | 0        | 0        |
| Burkholderia pyrrocinia/stabilis                        | 0        | 0        | 0        | 0        | 0        | 0        | 0        | 0        | 0        | 0        | 0        | 0        | 0        | 0        | 0        | 0        | 0        | 0        | 0        | 0        | 0        |
| Burkholderiales Genera incertae sedis                   | 0        | 0        | 0        | 0        | 0        | 0        | 0        | 0        | 0        | 0        | 0        | 0        | 0        | 0        | 0        | 0        | 0        | 0        | 0        | 0        | 0        |
| Campylobacter rectus/showae                             | 0        | 0        | 0        | 0        | 0        | 0        | 0        | 0        | 0        | 0        | 0        | 0        | 0        | 0        | 0        | 0        | 0        | 0        | 0        | 0        | 0        |
| Candidatus Saccharibacteria                             | 0        | 0        | 0        | 0        | 0        | 0        | 0        | 0        | 0        | 0        | 0        | 0        | 0        | 0        | 0        | 0        | 0        | 0        | 0        | 0        | 0        |
| Candidatus Saccharimonas                                | 0        | 0        | 0        | 0        | 0        | 0        | 0        | 0        | 0        | 0        | 0        | 0        | 0        | 0        | 0        | 0        | 0        | 0        | 0        | 0        | 0        |
| Capnocytophaga                                          | 0        | 0        | 0        | 0        | 0        | 0        | 0        | 0        | 0        | 0        | 0        | 0        | 0        | 0        | 0        | 0        | 0        | 0        | 0        | 0        | 0        |
| Cardiobacterium hominis                                 | 0        | 0        | 0        | 0        | 0        | 0        | 0        | 0        | 0        | 0        | 0        | 0        | 0        | 0        | 0        | 0        | 0        | 0        | 0        | 0        | 0        |
| Carnobacteriaceae                                       | 0        | 0        | 0        | 0        | 0        | 0        | 0        | 0        | 0        | 0        | 0        | 0        | 0        | 0        | 0        | 0        | 0        | 0        | 0        | 0        | 0        |
| Carnobacterium inhibens/jeotgali                        | 0        | 0        | 0        | 0        | 0        | 0        | 0        | 0        | 0        | 0        | 0        | 0        | 0        | 0        | 0        | 0        | 0        | 0        | 0        | 0        | 0        |
| Casaltella massiliensis                                 | 0        | 0        | 0        | 0        | 0        | 0        | 0        | 0        | 0        | 0        | 0        | 0        | 0        | 0        | 0        | 0        | 0        | 0        | 0        | 0        | 0        |
| Chelatococcus asaccharovorans                           | 0        | 0        | 0        | 0        | 0        | 0        | 0        | 0        | 0        | 0        | 0        | 0        | 0        | 0        | 0        | 0        | 0        | 0        | 0        | 0        | 0        |
| Chelatococcus/Methylobacterium                          | 0        | 0        | 0        | 0        | 0        | 0        | 0        | 0        | 0        | 0        | 0        | 0        | 0        | 0        | 0        | 0        | 0        | 0        | 0        | 0        | 0        |
| Chryseobacterium                                        | 0        | 0        | 0        | 0        | 0        | 0        | 0        | 0        | 0        | 0        | 0        | 0        | 0        | 0        | 0        | 0        | 0        | 0        | 0        | 0        | 0        |
| Chryseobacterium hominis                                | 0        | 0        | 0        | 0        | 0        | 0        | 0        | 0        | 0        | 0        | 0        | 0        | 0        | 0        | 0        | 0        | 0        | 0        | 0        | 0        | 0        |
| Chryseomicrobium amylolyticum                           | 0        | 0        | 0        | 0        | 0        | 0        | 0        | 0        | 0        | 0        | 0        | 0        | 0        | 0        | 0        | 0        | 0        | 0        | 0        | 0        | 0        |
| Cloacibacterium normanense                              | 0        | 0        | 0        | 0        | 0        | 0        | 0        | 0        | 0        | 0        | 0        | 0        | 0        | 0        | 0        | 0        | 0        | 0        | 0        | 0        | 0        |
| Clostridium                                             | 0        | 0        | 0        | 0        | 0        | 0        | 17       | 0        | 0        | 0        | 0        | 0        | 0        | 0        | 0        | 0        | 0        | 0        | 0        | 0        | 0        |
| Corynebacteriales                                       | 0        | 0        | 0        | 0        | 0        | 0        | 0        | 0        | 0        | 0        | 0        | 0        | 0        | 0        | 0        | 0        | 0        | 0        | 0        | 0        | 0        |
| Corynebacterium                                         | 0        | 0        | 0        | 0        | 0        | 0        | 0        | 0        | 0        | 0        | 0        | 0        | 0        | 0        | 0        | 0        | 0        | 0        | 0        | 0        | 0        |
| Corynebacterium accolens/macginleyi                     | 0        | 0        | 0        | 0        | 0        | 0        | 0        | 0        | 0        | 0        | 0        | 0        | 0        | 0        | 0        | 0        | 0        | 0        | 0        | 0        | 0        |
| Corynebacterium appendicis                              | 0        | 0        | 0        | 0        | 0        | 0        | 0        | 0        | 0        | 0        | 0        | 0        | 0        | 0        | 0        | 0        | 0        | 0        | 0        | 0        | 0        |
| Corynebacterium aurimucosum/minutissimum/singulare      | 0        | 0        | 0        | 0        | 0        | 0        | 0        | 0        | 0        | 0        | 0        | 0        | 0        | 0        | 0        | 0        | 0        | 0        | 0        | 0        | 0        |
| Corynebacterium coyleae                                 | 0        | 0        | 0        | 0        | 0        | 0        | 0        | 0        | 0        | 0        | 0        | 0        | 0        | 0        | 0        | 0        | 0        | 0        | 0        | 0        | 0        |
| Corynebacterium fournierii/mucifaciens/ureicelerivorans | 0        | 0        | 0        | 0        | 0        | 0        | 0        | 0        | 0        | 0        | 0        | 0        | 0        | 0        | 0        | 0        | 0        | 0        | 0        | 0        | 0        |
| Corynebacterium hadale/imitans                          | 0        | 0        | 0        | 0        | 0        | 0        | 0        | 0        | 0        | 0        | 0        | 0        | 0        | 0        | 0        | 0        | 0        | 0        | 0        | 0        | 0        |
| Corynebacterium pollutisoli                             | 0        | 0        | 0        | 0        | 0        | 0        | 0        | 0        | 0        | 0        | 0        | 0        | 0        | 0        | 0        | 0        | 0        | 0        | 0        | 0        | 0        |
| Corynebacterium propinquum/pseudodiphtheriticum         | 0        | 0        | 0        | 0        | 0        | 0        | 0        | 0        | 0        | 0        | 0        | 0        | 0        | 0        | 0        | 0        | 0        | 0        | 0        | 0        | 0        |
| Corynebacterium pseudogenitalium/tuberculoostearicum    | 0        | 0        | 0        | 0        | 0        | 0        | 0        | 0        | 3        | 0        | 0        | 0        | 0        | 0        | 0        | 0        | 0        | 0        | 0        | 0        | 0        |
| Craurococcus roseus                                     | 0        | 0        | 0        | 0        | 0        | 0        | 0        | 0        | 0        | 0        | 0        | 0        | 0        | 0        | 0        | 0        | 0        | 0        | 0        | 0        | 0        |
| Curvibacter                                             | 0        | 0        | 0        | 0        | 0        | 0        | 0        | 0        | 0        | 0        | 0        | 0        | 0        | 7        | 0        | 0        | 0        | 0        | 0        | 0        | 0        |



# Water\_64 - Water\_84

| Species                                                               | water_64 | water_65 | water_66 | water_67 | water_68 | water_69 | water_70 | water_71 | water_72 | water_73 | water_74 | water_75 | water_76 | water_77 | water_78 | water_79 | water_80 | water_81 | water_82 | water_83 | water_84 |
|-----------------------------------------------------------------------|----------|----------|----------|----------|----------|----------|----------|----------|----------|----------|----------|----------|----------|----------|----------|----------|----------|----------|----------|----------|----------|
| Noviherbaspirillum                                                    | 0        | 0        | 0        | 0        | 0        | 0        | 0        | 0        | 0        | 0        | 0        | 0        | 0        | 0        | 0        | 0        | 0        | 0        | 0        | 0        | 0        |
| Novosphingobium pentaromativorans/resinovorum                         | 0        | 0        | 0        | 0        | 0        | 0        | 0        | 0        | 0        | 0        | 0        | 0        | 0        | 0        | 0        | 0        | 0        | 0        | 0        | 0        | 0        |
| Paenibacillus                                                         | 0        | 0        | 0        | 0        | 0        | 0        | 0        | 0        | 5        | 0        | 7        | 0        | 0        | 6        | 0        | 0        | 0        | 0        | 0        | 0        | 0        |
| Pantoea agglomerans/dispersa                                          | 0        | 0        | 0        | 0        | 0        | 0        | 0        | 0        | 0        | 0        | 0        | 0        | 0        | 0        | 0        | 0        | 0        | 0        | 0        | 0        | 0        |
| Pantoea stewartii                                                     | 0        | 0        | 0        | 0        | 0        | 0        | 0        | 0        | 0        | 0        | 0        | 0        | 0        | 0        | 0        | 0        | 0        | 0        | 0        | 0        | 0        |
| Paracoccus                                                            | 0        | 0        | 0        | 0        | 0        | 0        | 0        | 0        | 0        | 0        | 0        | 0        | 0        | 0        | 0        | 0        | 0        | 0        | 0        | 0        | 0        |
| Peptoniphilus asaccharolyticus/grossensis/harei/phoceensis/rhinitidis | 0        | 0        | 0        | 0        | 0        | 0        | 0        | 0        | 0        | 0        | 0        | 0        | 0        | 0        | 0        | 0        | 0        | 0        | 0        | 0        | 0        |
| Phycococcus                                                           | 0        | 0        | 0        | 0        | 0        | 0        | 0        | 0        | 0        | 0        | 0        | 0        | 0        | 0        | 0        | 0        | 0        | 0        | 0        | 0        | 0        |
| Pontibacter                                                           | 0        | 0        | 0        | 0        | 0        | 0        | 0        | 0        | 0        | 0        | 0        | 0        | 0        | 0        | 0        | 0        | 0        | 0        | 0        | 0        | 0        |
| Porphyromonas                                                         | 0        | 0        | 0        | 0        | 0        | 0        | 0        | 0        | 0        | 0        | 0        | 0        | 0        | 0        | 0        | 0        | 0        | 0        | 0        | 0        | 0        |
| Prevotella                                                            | 0        | 0        | 0        | 0        | 39       | 0        | 0        | 0        | 0        | 0        | 0        | 0        | 0        | 0        | 0        | 0        | 0        | 0        | 0        | 0        | 0        |
| Prevotella amnii                                                      | 0        | 0        | 0        | 0        | 0        | 0        | 0        | 0        | 0        | 0        | 0        | 0        | 0        | 0        | 0        | 0        | 0        | 0        | 0        | 0        | 0        |
| Prevotella disiens                                                    | 0        | 0        | 0        | 0        | 0        | 0        | 0        | 0        | 0        | 0        | 0        | 0        | 0        | 0        | 0        | 0        | 0        | 0        | 0        | 0        | 0        |
| Prevotella melaninogenica                                             | 0        | 0        | 0        | 0        | 0        | 0        | 0        | 0        | 0        | 3        | 0        | 0        | 0        | 0        | 0        | 0        | 0        | 0        | 0        | 0        | 0        |
| Prevotella timonensis                                                 | 0        | 0        | 0        | 0        | 0        | 0        | 0        | 0        | 0        | 0        | 0        | 0        | 0        | 0        | 0        | 0        | 0        | 0        | 0        | 0        | 0        |
| Pseudoclavibacter                                                     | 0        | 0        | 0        | 0        | 0        | 0        | 0        | 0        | 0        | 0        | 0        | 0        | 0        | 0        | 0        | 0        | 0        | 0        | 0        | 0        | 0        |
| Pseudomonas antarctica/fluorescens                                    | 0        | 0        | 0        | 0        | 0        | 0        | 0        | 0        | 0        | 0        | 0        | 0        | 0        | 0        | 0        | 0        | 0        | 0        | 0        | 0        | 0        |
| Pseudomonas baetica                                                   | 0        | 0        | 0        | 0        | 0        | 0        | 0        | 0        | 0        | 0        | 0        | 0        | 0        | 0        | 0        | 0        | 0        | 0        | 0        | 0        | 0        |
| Pseudomonas fluorescens/koreensis                                     | 0        | 0        | 0        | 0        | 0        | 0        | 0        | 0        | 0        | 0        | 0        | 0        | 0        | 0        | 0        | 0        | 0        | 0        | 0        | 0        | 0        |
| Pseudomonas gessardii                                                 | 0        | 0        | 0        | 0        | 0        | 0        | 0        | 0        | 0        | 0        | 0        | 0        | 0        | 0        | 0        | 0        | 0        | 0        | 0        | 0        | 0        |
| Pseudomonas monteilii                                                 | 0        | 0        | 0        | 0        | 0        | 0        | 0        | 0        | 0        | 0        | 0        | 0        | 0        | 0        | 0        | 0        | 0        | 0        | 0        | 0        | 0        |
| Pseudomonas oleovorans/pseudoalcaligenes group                        | 0        | 0        | 0        | 0        | 0        | 0        | 0        | 0        | 0        | 0        | 0        | 0        | 0        | 0        | 0        | 0        | 0        | 0        | 0        | 0        | 0        |
| Pseudomonas resinovorans                                              | 0        | 0        | 0        | 0        | 0        | 0        | 0        | 0        | 0        | 0        | 0        | 0        | 0        | 0        | 0        | 0        | 0        | 0        | 0        | 0        | 0        |
| Pseudomonas stutzeri group                                            | 0        | 0        | 0        | 0        | 0        | 0        | 0        | 0        | 0        | 0        | 0        | 0        | 0        | 0        | 0        | 0        | 0        | 0        | 0        | 0        | 0        |
| Pseudomonas stutzeri subgroup                                         | 0        | 0        | 0        | 0        | 0        | 0        | 0        | 0        | 0        | 0        | 0        | 0        | 0        | 0        | 0        | 0        | 0        | 0        | 0        | 0        | 0        |
| Pseudomonas veronii                                                   | 0        | 0        | 0        | 0        | 0        | 0        | 0        | 0        | 0        | 0        | 0        | 0        | 0        | 0        | 0        | 0        | 0        | 0        | 0        | 0        | 0        |
| Pseudoxanthomonas indica                                              | 0        | 0        | 0        | 0        | 0        | 0        | 0        | 0        | 0        | 0        | 0        | 0        | 0        | 0        | 0        | 0        | 0        | 0        | 0        | 0        | 0        |
| Pseudoxanthomonas mexicana                                            | 0        | 0        | 0        | 0        | 0        | 0        | 0        | 0        | 0        | 0        | 0        | 0        | 0        | 0        | 0        | 0        | 0        | 0        | 0        | 0        | 0        |
| Psychrobacter alimentarius                                            | 0        | 0        | 0        | 0        | 0        | 0        | 0        | 0        | 0        | 0        | 0        | 0        | 0        | 0        | 0        | 0        | 0        | 0        | 0        | 0        | 0        |
| Rheinheimera                                                          | 0        | 0        | 0        | 0        | 0        | 0        | 0        | 0        | 0        | 0        | 0        | 0        | 0        | 0        | 0        | 0        | 0        | 0        | 0        | 0        | 0        |
| Rheinheimera perlucida                                                | 0        | 0        | 0        | 0        | 0        | 0        | 0        | 0        | 0        | 0        | 0        | 0        | 0        | 0        | 0        | 0        | 0        | 0        | 0        | 0        | 0        |
| Rhodobacter                                                           | 0        | 0        | 0        | 0        | 0        | 0        | 0        | 0        | 0        | 0        | 0        | 0        | 0        | 0        | 0        | 0        | 0        | 0        | 0        | 0        | 0        |
| Rhodobacteraceae                                                      | 0        | 0        | 0        | 0        | 0        | 0        | 0        | 0        | 0        | 0        | 0        | 0        | 0        | 0        | 0        | 0        | 0        | 0        | 0        | 0        | 0        |
| Rhodococcus corynebacterioides/kroppenstedtii                         | 0        | 0        | 0        | 0        | 0        | 0        | 0        | 0        | 0        | 0        | 0        | 0        | 0        | 0        | 0        | 0        | 0        | 0        | 0        | 0        | 0        |
| Romboutsia timonensis                                                 | 0        | 0        | 0        | 0        | 0        | 0        | 0        | 0        | 0        | 0        | 0        | 0        | 0        | 0        | 0        | 0        | 0        | 0        | 0        | 0        | 0        |
| Rothia                                                                | 0        | 0        | 0        | 0        | 0        | 0        | 0        | 0        | 0        | 0        | 0        | 0        | 0        | 0        | 0        | 0        | 0        | 0        | 0        | 0        | 0        |
| Rothia amarae                                                         | 0        | 0        | 0        | 0        | 0        | 0        | 0        | 0        | 0        | 0        | 0        | 0        | 0        | 0        | 0        | 0        | 0        | 0        | 0        | 0        | 0        |
| Saccharopolyspora                                                     | 0        | 0        | 0        | 0        | 0        | 0        | 0        | 0        | 0        | 0        | 0        | 0        | 0        | 0        | 0        | 0        | 0        | 0        | 0        | 0        | 0        |
| Shigella/Escherichia                                                  | 40       | 0        | 44       | 0        | 110      | 0        | 19       | 0        | 7        | 0        | 0        | 0        | 22       | 10       | 0        | 0        | 0        | 0        | 0        | 0        | 0        |
| Sneathia                                                              | 0        | 0        | 0        | 0        | 0        | 0        | 0        | 0        | 0        | 0        | 0        | 0        | 0        | 0        | 0        | 0        | 0        | 0        | 0        | 0        | 0        |
| Sneathia amnii                                                        | 0        | 0        | 0        | 0        | 0        | 0        | 0        | 0        | 0        | 0        | 0        | 0        | 0        | 0        | 0        | 0        | 0        | 0        | 0        | 0        | 0        |
| Sneathia sanguinigena                                                 | 0        | 0        | 0        | 0        | 0        | 0        | 0        | 0        | 0        | 0        | 0        | 0        | 0        | 0        | 0        | 0        | 0        | 0        | 0        | 0        | 0        |
| Sphingobium yanoikuyae                                                | 0        | 0        | 0        | 0        | 0        | 0        | 0        | 0        | 0        | 0        | 0        | 0        | 0        | 0        | 0        | 0        | 0        | 0        | 0        | 0        | 0        |
| Sphingomonas kaistensis                                               | 0        | 0        | 0        | 0        | 0        | 0        | 0        | 0        | 0        | 0        | 0        | 0        | 0        | 0        | 0        | 0        | 0        | 0        | 0        | 0        | 0        |
| Sphingomonas starnbergensis                                           | 0        | 0        | 0        | 0        | 0        | 0        | 0        | 0        | 0        | 0        | 0        | 0        | 0        | 0        | 0        | 0        | 0        | 0        | 0        | 0        | 0        |
| Staphylococcus aureus                                                 | 0        | 0        | 0        | 0        | 0        | 0        | 0        | 0        | 0        | 0        | 0        | 0        | 0        | 0        | 0        | 0        | 0        | 0        | 0        | 0        | 0        |
| Staphylococcus capitis/caprae                                         | 0        | 0        | 0        | 0        | 0        | 0        | 0        | 0        | 0        | 0        | 0        | 0        | 0        | 0        | 0        | 0        | 0        | 0        | 0        | 0        | 0        |
| Staphylococcus caprae/cohnii/epidermidis                              | 0        | 0        | 0        | 0        | 0        | 0        | 0        | 0        | 0        | 5        | 0        | 0        | 0        | 0        | 0        | 0        | 0        | 0        | 0        | 0        | 0        |
| Staphylococcus cohnii/saprophyticus                                   | 0        | 0        | 0        | 0        | 0        | 0        | 0        | 0        | 0        | 0        | 0        | 0        | 0        | 0        | 0        | 0        | 0        | 0        | 0        | 0        | 0        |
| Staphylococcus epidermidis/hominis                                    | 0        | 0        | 0        | 0        | 0        | 0        | 0        | 0        | 0        | 0        | 0        | 0        | 0        | 0        | 0        | 0        | 0        | 0        | 0        | 0        | 0        |
| Staphylococcus equorum/saprophyticus/xylosus                          | 0        | 0        | 0        | 0        | 0        | 0        | 0        | 0        | 0        | 0        | 0        | 0        | 0        | 0        | 0        | 0        | 0        | 0        | 0        | 0        | 0        |
| Staphylococcus haemolyticus                                           | 0        | 0        | 0        | 0        | 0        | 0        | 0        | 0        | 0        | 0        | 0        | 0        | 0        | 0        | 0        | 0        | 0        | 0        | 0        | 0        | 0        |
| Streptococcus                                                         | 0        | 0        | 0        | 0        | 0        | 0        | 0        | 0        | 0        | 0        | 0        | 0        | 0        | 0        | 0        | 0        | 0        | 0        | 0        | 0        | 0        |
| Streptococcus agalactiae                                              | 0        | 0        | 0        | 0        | 0        | 0        | 0        | 0        | 0        | 0        | 0        | 0        | 0        | 0        | 0        | 0        | 0        | 0        | 0        | 0        | 0        |
| Streptococcus anginosus                                               | 0        | 0        | 0        | 0        | 0        | 0        | 0        | 0        | 0        | 0        | 0        | 0        | 0        | 0        | 0        | 0        | 0        | 0        | 0        | 0        | 0        |
| Streptococcus mitis group                                             | 17       | 8        | 31       | 8        | 68       | 0        | 15       | 12       | 12       | 8        | 8        | 9        | 7        | 10       | 7        | 0        | 6        | 15       | 13       | 0        | 14       |
| Thiopsedomonas                                                        | 0        | 0        | 0        | 0        | 0        | 0        | 0        | 0        | 0        | 0        | 0        | 0        | 0        | 0        | 0        | 0        | 0        | 0        | 0        | 0        | 0        |
| Turicella otitidis                                                    | 0        | 0        | 0        | 0        | 0        | 0        | 0        | 0        | 0        | 0        | 0        | 0        | 0        | 0        | 0        | 0        | 0        | 0        | 0        | 0        | 0        |
| unclassified Clostridiales                                            | 0        | 0        | 0        | 0        | 0        | 0        | 0        | 0        | 0        | 0        | 0        | 0        | 0        | 0        | 0        | 0        | 0        | 0        | 0        | 0        | 0        |
| Undibacterium                                                         | 0        | 0        | 0        | 0        | 0        | 0        | 0        | 0        | 0        | 0        | 0        | 0        | 0        | 0        | 0        | 0        | 0        | 0        | 0        | 0        | 0        |
| Variovorax gossypii                                                   | 0        | 0        | 0        | 0        | 0        | 0        | 0        | 0        | 0        | 0        | 0        | 0        | 0        | 0        | 0        | 0        | 0        | 0        | 0        | 0        | 0        |
| Veillonella                                                           | 0        | 0        | 0        | 0        | 0        | 0        | 0        | 0        | 0        | 0        | 0        | 0        | 0        | 0        | 0        | 0        | 0        | 0        | 0        | 0        | 0        |
| Veillonella dispar/parvula                                            | 0        | 0        | 0        | 0        | 0        | 0        | 0        | 0        | 0        | 0        | 0        | 0        | 0        | 0        | 0        | 0        | 0        | 0        | 0        | 0        | 0        |
| Veillonella montpellierensis                                          | 0        | 0        | 0        | 0        | 0        | 0        | 0        | 0        | 0        | 0        | 0        | 0        | 0        | 0        | 0        | 0        | 0        | 0        | 0        | 0        | 0        |
| Williamsia faeni/muralis                                              | 0        | 0        | 0        | 0        | 0        | 0        | 0        | 0        | 0        | 0        | 0        | 0        | 0        | 0        | 0        | 0        | 0        | 0        | 0        | 0        | 0        |
| Zoogloea resiniphila                                                  | 0        | 0        | 0        | 0        | 0        | 0        | 0        | 0        | 0        | 0        | 0        | 0        | 0        | 0        | 0        | 0        | 0        | 0        | 0        | 0        | 0        |

# Water\_85 - Water\_104

| Species                                                 | water_85 | water_86 | water_87 | water_88 | water_89 | water_90 | water_91 | water_92 | water_93 | water_94 | water_95 | water_96 | water_97 | water_98 | water_99 | water_100 | water_101 | water_102 | water_103 | water_104 |
|---------------------------------------------------------|----------|----------|----------|----------|----------|----------|----------|----------|----------|----------|----------|----------|----------|----------|----------|-----------|-----------|-----------|-----------|-----------|
| [Clostridium] hiranonis                                 | 0        | 0        | 0        | 0        | 0        | 0        | 0        | 0        | 0        | 0        | 0        | 0        | 0        | 0        | 0        | 0         | 0         | 0         | 0         | 0         |
| Acidovorax/Undibacterium                                | 0        | 0        | 0        | 0        | 0        | 0        | 0        | 0        | 0        | 0        | 0        | 0        | 0        | 0        | 0        | 0         | 0         | 0         | 0         | 0         |
| Acinetobacter haemolyticus/johnsonii                    | 0        | 0        | 0        | 0        | 0        | 0        | 0        | 0        | 0        | 0        | 0        | 0        | 0        | 0        | 0        | 0         | 0         | 0         | 0         | 0         |
| Acinetobacter haemolyticus/schindleri                   | 0        | 0        | 0        | 0        | 0        | 0        | 0        | 0        | 0        | 0        | 0        | 0        | 0        | 0        | 0        | 0         | 0         | 0         | 0         | 0         |
| Acinetobacter parvus                                    | 0        | 0        | 0        | 0        | 0        | 0        | 0        | 0        | 0        | 0        | 0        | 0        | 0        | 0        | 0        | 0         | 0         | 0         | 0         | 0         |
| Acinetobacter proteolyticus                             | 0        | 0        | 0        | 0        | 0        | 0        | 0        | 0        | 0        | 0        | 0        | 0        | 0        | 0        | 0        | 0         | 0         | 0         | 0         | 0         |
| Acinetobacter schindleri                                | 0        | 0        | 0        | 0        | 0        | 0        | 0        | 0        | 0        | 0        | 0        | 0        | 0        | 0        | 0        | 0         | 0         | 0         | 0         | 0         |
| Actinomyces oris/viscosus                               | 0        | 0        | 0        | 0        | 0        | 0        | 0        | 0        | 0        | 0        | 0        | 0        | 0        | 0        | 0        | 0         | 0         | 0         | 0         | 0         |
| Aerococcus urinaeequi/viridans                          | 0        | 0        | 0        | 0        | 0        | 0        | 0        | 0        | 0        | 0        | 0        | 0        | 0        | 0        | 0        | 0         | 0         | 0         | 0         | 0         |
| Aeromonas caviae                                        | 0        | 0        | 0        | 0        | 0        | 0        | 0        | 0        | 0        | 0        | 0        | 0        | 0        | 0        | 0        | 0         | 0         | 0         | 0         | 0         |
| Aeromonas veronii                                       | 0        | 0        | 0        | 0        | 0        | 0        | 0        | 8        | 0        | 0        | 0        | 0        | 0        | 0        | 0        | 0         | 0         | 0         | 0         | 0         |
| Afipia                                                  | 0        | 0        | 0        | 0        | 0        | 0        | 0        | 0        | 0        | 0        | 0        | 0        | 0        | 0        | 0        | 0         | 0         | 0         | 0         | 0         |
| Aggregatibacter aphrophilus                             | 0        | 0        | 0        | 0        | 0        | 0        | 0        | 0        | 0        | 0        | 0        | 0        | 0        | 0        | 0        | 0         | 0         | 0         | 0         | 0         |
| Alishewanella                                           | 0        | 0        | 0        | 0        | 0        | 0        | 0        | 0        | 0        | 0        | 0        | 0        | 0        | 0        | 0        | 0         | 0         | 0         | 0         | 0         |
| Alloiooccus                                             | 0        | 0        | 0        | 0        | 0        | 0        | 0        | 0        | 0        | 0        | 0        | 0        | 0        | 0        | 0        | 0         | 0         | 0         | 0         | 0         |
| Altererythrobacter epoxidivorans                        | 0        | 0        | 0        | 0        | 0        | 0        | 0        | 0        | 0        | 0        | 0        | 0        | 0        | 0        | 0        | 0         | 0         | 0         | 0         | 0         |
| Anaerococcus                                            | 0        | 0        | 0        | 0        | 0        | 0        | 0        | 0        | 0        | 0        | 0        | 0        | 0        | 0        | 0        | 0         | 0         | 0         | 0         | 0         |
| Anaerococcus lactolyticus                               | 0        | 0        | 0        | 0        | 0        | 0        | 0        | 0        | 0        | 0        | 0        | 0        | 0        | 0        | 0        | 0         | 0         | 0         | 0         | 0         |
| Anaerococcus octavius                                   | 0        | 0        | 0        | 0        | 0        | 0        | 0        | 0        | 0        | 0        | 0        | 0        | 0        | 0        | 0        | 0         | 0         | 0         | 0         | 0         |
| Anaerococcus prevotii/tetradius                         | 0        | 0        | 0        | 0        | 0        | 0        | 0        | 0        | 0        | 0        | 0        | 0        | 0        | 0        | 0        | 0         | 0         | 0         | 0         | 0         |
| Anaeromyxobacter                                        | 0        | 0        | 0        | 0        | 0        | 0        | 0        | 0        | 0        | 0        | 0        | 0        | 0        | 0        | 0        | 0         | 0         | 0         | 0         | 0         |
| Arenimonas                                              | 0        | 0        | 0        | 0        | 0        | 0        | 0        | 0        | 0        | 0        | 0        | 0        | 0        | 0        | 0        | 0         | 0         | 0         | 0         | 0         |
| Atopobium vaginae                                       | 0        | 0        | 0        | 0        | 0        | 0        | 0        | 0        | 0        | 0        | 0        | 0        | 0        | 0        | 0        | 0         | 0         | 0         | 0         | 0         |
| Bacillaceae                                             | 0        | 0        | 0        | 0        | 0        | 0        | 0        | 0        | 0        | 0        | 0        | 0        | 0        | 0        | 0        | 0         | 0         | 0         | 0         | 0         |
| Bacillus dakarensis                                     | 0        | 0        | 0        | 0        | 0        | 0        | 0        | 0        | 0        | 0        | 0        | 0        | 0        | 0        | 0        | 0         | 0         | 0         | 0         | 0         |
| Bacillus foraminis                                      | 0        | 0        | 0        | 0        | 0        | 0        | 0        | 0        | 0        | 0        | 0        | 0        | 0        | 0        | 0        | 0         | 0         | 0         | 0         | 0         |
| Bacillus idriensis                                      | 0        | 0        | 0        | 0        | 68       | 0        | 0        | 103      | 22       | 0        | 0        | 0        | 0        | 0        | 0        | 0         | 0         | 35        | 0         | 20        |
| Bacillus malikii                                        | 0        | 0        | 0        | 0        | 0        | 0        | 0        | 0        | 0        | 0        | 0        | 0        | 0        | 0        | 0        | 0         | 0         | 0         | 0         | 0         |
| Bacteroidales                                           | 0        | 0        | 0        | 0        | 0        | 0        | 20       | 0        | 0        | 0        | 0        | 0        | 0        | 0        | 0        | 0         | 0         | 0         | 0         | 0         |
| Bergeyella                                              | 0        | 0        | 0        | 0        | 0        | 0        | 0        | 0        | 0        | 0        | 0        | 0        | 0        | 0        | 0        | 0         | 0         | 0         | 0         | 0         |
| Betaproteobacteria                                      | 0        | 0        | 0        | 0        | 0        | 0        | 0        | 0        | 0        | 0        | 0        | 0        | 0        | 0        | 0        | 0         | 0         | 0         | 0         | 0         |
| Blastococcus endophyticus                               | 0        | 0        | 0        | 0        | 0        | 0        | 0        | 0        | 0        | 0        | 0        | 0        | 0        | 0        | 0        | 0         | 0         | 0         | 0         | 0         |
| Brevibacterium                                          | 0        | 0        | 0        | 0        | 0        | 0        | 0        | 0        | 0        | 0        | 0        | 0        | 0        | 0        | 0        | 0         | 0         | 0         | 0         | 0         |
| Brevibacterium casei                                    | 0        | 0        | 0        | 0        | 0        | 0        | 0        | 0        | 0        | 0        | 0        | 0        | 0        | 0        | 0        | 0         | 0         | 0         | 0         | 0         |
| Brevibacterium ihuae                                    | 0        | 0        | 0        | 0        | 0        | 0        | 0        | 0        | 0        | 0        | 0        | 0        | 0        | 0        | 0        | 0         | 0         | 0         | 0         | 0         |
| Brevundimonas                                           | 0        | 0        | 0        | 0        | 0        | 0        | 0        | 0        | 0        | 0        | 0        | 0        | 0        | 0        | 0        | 0         | 0         | 0         | 0         | 0         |
| Brevundimonas vesicularis                               | 0        | 0        | 0        | 0        | 0        | 0        | 0        | 0        | 0        | 0        | 0        | 0        | 0        | 0        | 0        | 0         | 0         | 0         | 0         | 0         |
| Brevundimonas/Caulobacter                               | 0        | 0        | 0        | 0        | 0        | 0        | 0        | 0        | 0        | 0        | 0        | 0        | 0        | 0        | 0        | 0         | 0         | 0         | 0         | 0         |
| Burkholderia pyrrocinia/stabilis                        | 0        | 0        | 0        | 0        | 0        | 0        | 0        | 0        | 0        | 0        | 0        | 0        | 0        | 0        | 0        | 0         | 0         | 0         | 0         | 0         |
| Burkholderiales Genera incertae sedis                   | 0        | 0        | 0        | 0        | 0        | 0        | 0        | 0        | 0        | 0        | 0        | 0        | 0        | 0        | 0        | 0         | 0         | 0         | 0         | 0         |
| Campylobacter rectus/showae                             | 0        | 0        | 0        | 0        | 0        | 0        | 0        | 0        | 0        | 0        | 0        | 0        | 0        | 0        | 0        | 0         | 0         | 0         | 0         | 0         |
| Candidatus Saccharibacteria                             | 0        | 0        | 0        | 0        | 0        | 0        | 0        | 0        | 0        | 0        | 0        | 0        | 0        | 0        | 0        | 0         | 0         | 0         | 0         | 0         |
| Candidatus Saccharimonas                                | 0        | 0        | 0        | 0        | 19       | 0        | 0        | 0        | 0        | 0        | 0        | 0        | 0        | 0        | 0        | 0         | 0         | 0         | 0         | 0         |
| Capnocytophaga                                          | 0        | 0        | 0        | 0        | 0        | 0        | 0        | 0        | 0        | 0        | 0        | 0        | 0        | 0        | 0        | 0         | 0         | 0         | 0         | 0         |
| Cardiobacterium hominis                                 | 0        | 0        | 0        | 0        | 0        | 0        | 0        | 0        | 0        | 0        | 0        | 0        | 0        | 0        | 0        | 0         | 0         | 0         | 0         | 0         |
| Carnobacteriaceae                                       | 0        | 0        | 0        | 0        | 0        | 0        | 0        | 0        | 0        | 0        | 0        | 0        | 0        | 0        | 0        | 0         | 0         | 0         | 0         | 0         |
| Carnobacterium in hibens/jeotgali                       | 0        | 0        | 0        | 0        | 0        | 0        | 0        | 0        | 0        | 0        | 0        | 0        | 0        | 0        | 0        | 0         | 0         | 0         | 0         | 0         |
| Casaltella massiliensis                                 | 0        | 0        | 0        | 0        | 0        | 0        | 0        | 0        | 0        | 0        | 0        | 0        | 0        | 0        | 0        | 0         | 0         | 0         | 0         | 0         |
| Chelatococcus asaccharovorans                           | 0        | 0        | 0        | 0        | 0        | 0        | 0        | 0        | 0        | 0        | 0        | 0        | 0        | 0        | 0        | 0         | 0         | 0         | 0         | 0         |
| Chelatococcus/Methylobacterium                          | 0        | 0        | 0        | 0        | 0        | 5        | 0        | 0        | 0        | 0        | 0        | 0        | 0        | 0        | 0        | 0         | 0         | 0         | 0         | 0         |
| Chryseobacterium                                        | 0        | 0        | 0        | 0        | 0        | 0        | 0        | 0        | 0        | 0        | 0        | 0        | 0        | 0        | 0        | 0         | 0         | 0         | 0         | 0         |
| Chryseobacterium hominis                                | 0        | 0        | 0        | 0        | 0        | 0        | 0        | 0        | 0        | 0        | 0        | 0        | 0        | 0        | 0        | 0         | 0         | 0         | 0         | 0         |
| Chryseomicrobium amylolyticum                           | 0        | 0        | 0        | 0        | 0        | 0        | 0        | 0        | 0        | 0        | 0        | 0        | 0        | 0        | 0        | 0         | 0         | 0         | 0         | 0         |
| Cloacibacterium normanense                              | 0        | 0        | 0        | 0        | 0        | 0        | 0        | 0        | 0        | 0        | 0        | 0        | 0        | 0        | 0        | 0         | 0         | 0         | 0         | 0         |
| Clostridium                                             | 0        | 0        | 0        | 0        | 0        | 0        | 0        | 0        | 0        | 0        | 0        | 0        | 0        | 0        | 0        | 0         | 0         | 0         | 0         | 0         |
| Corynebacteriales                                       | 0        | 0        | 0        | 0        | 0        | 0        | 0        | 0        | 0        | 0        | 0        | 0        | 0        | 0        | 0        | 0         | 0         | 0         | 0         | 0         |
| Corynebacterium                                         | 0        | 0        | 0        | 0        | 0        | 0        | 0        | 0        | 0        | 0        | 0        | 0        | 0        | 0        | 0        | 0         | 0         | 0         | 0         | 0         |
| Corynebacterium accolens/macginleyi                     | 0        | 0        | 0        | 0        | 0        | 0        | 0        | 0        | 0        | 0        | 0        | 0        | 0        | 0        | 0        | 0         | 0         | 0         | 0         | 0         |
| Corynebacterium appendicis                              | 0        | 0        | 0        | 0        | 0        | 0        | 0        | 0        | 0        | 0        | 0        | 0        | 0        | 0        | 0        | 0         | 0         | 0         | 0         | 0         |
| Corynebacterium aurimucosum/minutissimum/singulare      | 0        | 0        | 0        | 0        | 0        | 0        | 0        | 0        | 0        | 0        | 0        | 0        | 0        | 0        | 0        | 0         | 0         | 0         | 0         | 0         |
| Corynebacterium coyleae                                 | 0        | 0        | 0        | 0        | 0        | 0        | 0        | 0        | 0        | 0        | 0        | 0        | 0        | 0        | 0        | 0         | 0         | 0         | 0         | 0         |
| Corynebacterium fournierii/mucifaciens/ureicelerivorans | 0        | 0        | 0        | 0        | 0        | 0        | 0        | 0        | 0        | 0        | 0        | 0        | 0        | 0        | 0        | 0         | 0         | 0         | 0         | 0         |
| Corynebacterium hadale/imitans                          | 0        | 0        | 0        | 0        | 0        | 0        | 0        | 0        | 0        | 0        | 0        | 0        | 0        | 0        | 0        | 0         | 0         | 0         | 0         | 0         |
| Corynebacterium pollutisoli                             | 0        | 0        | 0        | 0        | 0        | 0        | 0        | 0        | 0        | 0        | 0        | 0        | 0        | 0        | 0        | 0         | 0         | 0         | 0         | 0         |
| Corynebacterium propinquum/pseudodiphtheriticum         | 0        | 0        | 0        | 0        | 0        | 0        | 0        | 0        | 0        | 0        | 0        | 0        | 0        | 0        | 0        | 0         | 0         | 0         | 0         | 0         |
| Corynebacterium pseudogenitalium/tuberculostearicum     | 0        | 0        | 0        | 0        | 0        | 0        | 0        | 0        | 0        | 0        | 0        | 0        | 0        | 0        | 3        | 0         | 0         | 0         | 0         | 0         |
| Craurococcus roseus                                     | 0        | 0        | 0        | 0        | 0        | 0        | 0        | 0        | 0        | 0        | 0        | 0        | 0        | 0        | 0        | 0         | 0         | 0         | 0         | 0         |
| Curvibacter                                             | 0        | 0        | 0        | 0        | 0        | 0        | 0        | 0        | 0        | 22       | 0        | 0        | 0        | 0        | 0        | 0         | 16        | 0         | 0         | 0         |



# Water\_85 - Water\_104

| Species                                                               | water_85 | water_86 | water_87 | water_88 | water_89 | water_90 | water_91 | water_92 | water_93 | water_94 | water_95 | water_96 | water_97 | water_98 | water_99 | water_100 | water_101 | water_102 | water_103 | water_104 |
|-----------------------------------------------------------------------|----------|----------|----------|----------|----------|----------|----------|----------|----------|----------|----------|----------|----------|----------|----------|-----------|-----------|-----------|-----------|-----------|
| Noviherbaspirillum                                                    | 0        | 0        | 0        | 0        | 0        | 0        | 0        | 0        | 0        | 0        | 0        | 0        | 0        | 0        | 0        | 0         | 0         | 0         | 0         | 0         |
| Novosphingobium pentaromativorans/resinovorum                         | 0        | 0        | 0        | 0        | 0        | 0        | 0        | 0        | 0        | 0        | 0        | 0        | 0        | 0        | 0        | 0         | 0         | 0         | 0         | 0         |
| Paenibacillus                                                         | 0        | 0        | 0        | 0        | 0        | 0        | 0        | 0        | 0        | 0        | 44       | 0        | 0        | 0        | 0        | 0         | 0         | 0         | 0         | 0         |
| Pantoea agglomerans/dispersa                                          | 0        | 0        | 0        | 0        | 0        | 0        | 0        | 0        | 0        | 0        | 0        | 0        | 0        | 0        | 0        | 0         | 0         | 0         | 0         | 0         |
| Pantoea stewartii                                                     | 0        | 0        | 0        | 0        | 0        | 0        | 0        | 0        | 0        | 0        | 0        | 0        | 0        | 0        | 0        | 0         | 0         | 0         | 0         | 0         |
| Paracoccus                                                            | 0        | 0        | 0        | 0        | 0        | 0        | 0        | 0        | 0        | 0        | 0        | 0        | 0        | 0        | 0        | 0         | 0         | 0         | 0         | 0         |
| Peptoniphilus asaccharolyticus/grossensis/harei/phoceensis/rhinitidis | 0        | 0        | 0        | 0        | 0        | 0        | 0        | 0        | 0        | 0        | 0        | 0        | 0        | 0        | 0        | 0         | 0         | 0         | 0         | 0         |
| Phycococcus                                                           | 0        | 0        | 0        | 0        | 0        | 0        | 0        | 0        | 0        | 0        | 0        | 0        | 0        | 0        | 0        | 0         | 0         | 0         | 0         | 0         |
| Pontibacter                                                           | 0        | 0        | 0        | 0        | 0        | 0        | 0        | 0        | 0        | 0        | 0        | 0        | 0        | 0        | 0        | 0         | 0         | 0         | 0         | 0         |
| Porphyromonas                                                         | 0        | 0        | 0        | 0        | 0        | 0        | 0        | 0        | 0        | 0        | 0        | 0        | 0        | 0        | 0        | 0         | 0         | 0         | 0         | 0         |
| Prevotella                                                            | 0        | 0        | 0        | 0        | 0        | 0        | 0        | 0        | 0        | 0        | 0        | 0        | 0        | 0        | 0        | 0         | 0         | 19        | 0         | 0         |
| Prevotella amnii                                                      | 0        | 0        | 0        | 0        | 0        | 0        | 0        | 0        | 0        | 0        | 0        | 0        | 0        | 0        | 0        | 0         | 0         | 0         | 0         | 0         |
| Prevotella disiens                                                    | 0        | 0        | 0        | 0        | 0        | 0        | 0        | 0        | 0        | 0        | 0        | 0        | 0        | 0        | 0        | 0         | 0         | 0         | 0         | 0         |
| Prevotella melaninogenica                                             | 0        | 0        | 0        | 0        | 0        | 0        | 0        | 0        | 0        | 0        | 0        | 0        | 0        | 0        | 0        | 0         | 0         | 0         | 0         | 0         |
| Prevotella timonensis                                                 | 0        | 0        | 0        | 0        | 0        | 0        | 0        | 0        | 0        | 0        | 0        | 0        | 0        | 0        | 0        | 0         | 0         | 0         | 0         | 0         |
| Pseudoclavibacter                                                     | 0        | 0        | 0        | 0        | 0        | 0        | 0        | 0        | 0        | 0        | 0        | 0        | 0        | 0        | 0        | 0         | 0         | 0         | 0         | 0         |
| Pseudomonas antarctica/fluorescens                                    | 0        | 0        | 0        | 0        | 0        | 0        | 0        | 0        | 0        | 0        | 0        | 0        | 0        | 0        | 0        | 0         | 0         | 0         | 0         | 0         |
| Pseudomonas baetica                                                   | 0        | 0        | 0        | 0        | 0        | 0        | 0        | 0        | 0        | 0        | 0        | 0        | 0        | 0        | 0        | 0         | 0         | 0         | 0         | 0         |
| Pseudomonas fluorescens/koreensis                                     | 0        | 0        | 0        | 0        | 0        | 0        | 0        | 0        | 0        | 0        | 0        | 0        | 0        | 0        | 0        | 0         | 0         | 0         | 0         | 0         |
| Pseudomonas gessardii                                                 | 0        | 0        | 0        | 0        | 0        | 0        | 0        | 0        | 0        | 0        | 0        | 0        | 0        | 0        | 0        | 0         | 0         | 0         | 0         | 0         |
| Pseudomonas monteilli                                                 | 0        | 0        | 0        | 0        | 0        | 0        | 0        | 0        | 0        | 0        | 0        | 0        | 0        | 0        | 0        | 0         | 0         | 0         | 0         | 0         |
| Pseudomonas oleovorans/pseudoalcaligenes group                        | 0        | 0        | 0        | 0        | 0        | 0        | 0        | 0        | 0        | 0        | 0        | 0        | 0        | 0        | 0        | 0         | 0         | 0         | 0         | 0         |
| Pseudomonas resinovorans                                              | 0        | 0        | 0        | 0        | 0        | 0        | 0        | 0        | 0        | 0        | 0        | 0        | 0        | 0        | 0        | 0         | 0         | 0         | 0         | 0         |
| Pseudomonas stutzeri group                                            | 0        | 0        | 0        | 0        | 0        | 0        | 0        | 0        | 0        | 0        | 0        | 0        | 0        | 0        | 0        | 0         | 0         | 0         | 0         | 0         |
| Pseudomonas stutzeri subgroup                                         | 0        | 0        | 0        | 0        | 0        | 0        | 0        | 0        | 0        | 0        | 0        | 0        | 0        | 0        | 0        | 0         | 0         | 0         | 0         | 0         |
| Pseudomonas veronii                                                   | 0        | 0        | 0        | 0        | 0        | 0        | 0        | 0        | 0        | 0        | 0        | 0        | 0        | 0        | 0        | 0         | 0         | 0         | 0         | 0         |
| Pseudoxanthomonas indica                                              | 0        | 0        | 0        | 0        | 0        | 0        | 0        | 0        | 0        | 0        | 0        | 0        | 0        | 0        | 0        | 0         | 0         | 0         | 0         | 0         |
| Pseudoxanthomonas mexicana                                            | 0        | 0        | 0        | 0        | 0        | 0        | 0        | 0        | 0        | 0        | 0        | 0        | 0        | 0        | 0        | 0         | 0         | 0         | 0         | 0         |
| Psychrobacter alimentarius                                            | 0        | 0        | 0        | 0        | 0        | 0        | 0        | 0        | 0        | 0        | 0        | 0        | 0        | 0        | 0        | 0         | 0         | 0         | 0         | 0         |
| Rheinheimera                                                          | 0        | 0        | 0        | 0        | 0        | 0        | 0        | 0        | 0        | 0        | 0        | 0        | 0        | 0        | 0        | 0         | 0         | 0         | 0         | 0         |
| Rheinheimera perlucida                                                | 0        | 0        | 0        | 0        | 0        | 0        | 0        | 0        | 0        | 0        | 0        | 0        | 0        | 0        | 0        | 0         | 0         | 0         | 0         | 0         |
| Rhodobacter                                                           | 0        | 0        | 0        | 0        | 0        | 0        | 0        | 0        | 0        | 0        | 0        | 0        | 0        | 0        | 0        | 0         | 0         | 0         | 0         | 0         |
| Rhodobacteraceae                                                      | 0        | 0        | 0        | 0        | 0        | 0        | 6        | 0        | 0        | 0        | 0        | 0        | 0        | 0        | 0        | 0         | 0         | 0         | 0         | 0         |
| Rhodococcus corynebacterioides/kroppenstedtii                         | 0        | 0        | 0        | 0        | 0        | 0        | 0        | 0        | 0        | 0        | 0        | 0        | 0        | 0        | 0        | 0         | 0         | 0         | 0         | 0         |
| Romboutsia timonensis                                                 | 0        | 0        | 0        | 0        | 0        | 0        | 0        | 0        | 0        | 0        | 0        | 0        | 0        | 0        | 0        | 0         | 0         | 0         | 0         | 0         |
| Rothia                                                                | 0        | 0        | 0        | 0        | 0        | 0        | 0        | 0        | 0        | 0        | 0        | 0        | 0        | 0        | 0        | 0         | 0         | 0         | 0         | 0         |
| Rothia amarae                                                         | 0        | 0        | 0        | 0        | 0        | 0        | 0        | 0        | 0        | 0        | 0        | 0        | 0        | 0        | 0        | 0         | 0         | 0         | 0         | 0         |
| Saccharopolyspora                                                     | 0        | 0        | 0        | 0        | 0        | 0        | 0        | 0        | 0        | 0        | 0        | 0        | 0        | 0        | 0        | 0         | 0         | 0         | 0         | 0         |
| Shigella/Escherichia                                                  | 0        | 0        | 0        | 0        | 32       | 0        | 0        | 14       | 0        | 0        | 77       | 0        | 0        | 18       | 0        | 0         | 18        | 0         | 0         | 0         |
| Sneathia                                                              | 0        | 0        | 0        | 0        | 0        | 0        | 0        | 0        | 0        | 0        | 0        | 0        | 0        | 0        | 0        | 0         | 0         | 0         | 0         | 0         |
| Sneathia amnii                                                        | 0        | 0        | 0        | 0        | 0        | 0        | 0        | 0        | 0        | 0        | 0        | 0        | 0        | 0        | 0        | 0         | 0         | 0         | 0         | 0         |
| Sneathia sanguinigena                                                 | 0        | 0        | 0        | 0        | 0        | 0        | 0        | 0        | 0        | 0        | 0        | 0        | 0        | 0        | 0        | 0         | 0         | 0         | 0         | 0         |
| Sphingobium yanoikuyae                                                | 0        | 0        | 0        | 0        | 0        | 0        | 0        | 0        | 0        | 0        | 0        | 0        | 0        | 0        | 0        | 0         | 0         | 0         | 0         | 0         |
| Sphingomonas kaistensis                                               | 0        | 0        | 0        | 0        | 0        | 0        | 0        | 0        | 0        | 0        | 0        | 0        | 0        | 0        | 0        | 0         | 0         | 0         | 0         | 0         |
| Sphingomonas starnbergensis                                           | 0        | 0        | 0        | 0        | 0        | 0        | 0        | 0        | 0        | 0        | 0        | 0        | 0        | 0        | 0        | 0         | 0         | 0         | 0         | 0         |
| Staphylococcus aureus                                                 | 0        | 0        | 0        | 0        | 0        | 0        | 0        | 0        | 0        | 0        | 0        | 0        | 0        | 0        | 0        | 0         | 0         | 0         | 0         | 0         |
| Staphylococcus capitis/caprae                                         | 0        | 0        | 0        | 0        | 0        | 0        | 0        | 0        | 0        | 0        | 0        | 0        | 0        | 0        | 0        | 0         | 0         | 0         | 0         | 0         |
| Staphylococcus caprae/cohnii/epidermidis                              | 0        | 0        | 0        | 0        | 0        | 0        | 0        | 0        | 0        | 0        | 0        | 0        | 0        | 0        | 0        | 0         | 0         | 0         | 0         | 0         |
| Staphylococcus cohnii/saprophyticus                                   | 0        | 0        | 0        | 0        | 0        | 0        | 0        | 0        | 0        | 0        | 0        | 0        | 0        | 0        | 0        | 0         | 0         | 0         | 0         | 0         |
| Staphylococcus epidermidis/hominis                                    | 0        | 0        | 0        | 0        | 0        | 0        | 0        | 0        | 0        | 0        | 0        | 0        | 0        | 0        | 0        | 0         | 0         | 0         | 0         | 0         |
| Staphylococcus equorum/saprophyticus/xylosus                          | 0        | 0        | 0        | 0        | 0        | 0        | 0        | 0        | 0        | 0        | 0        | 0        | 0        | 0        | 0        | 0         | 0         | 0         | 0         | 0         |
| Staphylococcus haemolyticus                                           | 0        | 0        | 0        | 0        | 0        | 0        | 0        | 0        | 0        | 0        | 0        | 0        | 0        | 0        | 0        | 0         | 0         | 0         | 0         | 0         |
| Streptococcus                                                         | 0        | 0        | 0        | 0        | 0        | 0        | 0        | 0        | 0        | 0        | 0        | 0        | 1        | 0        | 0        | 0         | 0         | 0         | 0         | 0         |
| Streptococcus agalactiae                                              | 0        | 0        | 0        | 0        | 0        | 0        | 0        | 0        | 0        | 0        | 0        | 0        | 0        | 0        | 0        | 0         | 0         | 0         | 0         | 0         |
| Streptococcus anginosus                                               | 0        | 0        | 0        | 0        | 0        | 0        | 0        | 0        | 0        | 0        | 0        | 0        | 0        | 0        | 0        | 0         | 0         | 0         | 0         | 0         |
| Streptococcus mitis group                                             | 8        | 8        | 10       | 12       | 0        | 0        | 8        | 0        | 0        | 5        | 0        | 7        | 0        | 7        | 10       | 6         | 8         | 3         | 7         | 0         |
| Thiopsedomonas                                                        | 0        | 0        | 0        | 0        | 0        | 0        | 0        | 0        | 0        | 0        | 0        | 0        | 0        | 0        | 0        | 0         | 0         | 0         | 0         | 0         |
| Turicella otitidis                                                    | 0        | 0        | 0        | 0        | 0        | 0        | 0        | 0        | 0        | 0        | 0        | 0        | 0        | 0        | 0        | 0         | 0         | 0         | 0         | 0         |
| unclassified Clostridiales                                            | 0        | 0        | 0        | 0        | 0        | 0        | 0        | 0        | 0        | 0        | 0        | 0        | 0        | 0        | 0        | 0         | 0         | 0         | 0         | 0         |
| Undibacterium                                                         | 0        | 0        | 0        | 0        | 0        | 0        | 0        | 0        | 0        | 0        | 0        | 0        | 0        | 0        | 0        | 0         | 0         | 0         | 0         | 0         |
| Variovorax gossypii                                                   | 0        | 0        | 0        | 0        | 0        | 0        | 0        | 0        | 0        | 0        | 0        | 0        | 0        | 0        | 0        | 0         | 0         | 0         | 0         | 0         |
| Veillonella                                                           | 0        | 0        | 0        | 0        | 0        | 0        | 0        | 0        | 0        | 0        | 0        | 0        | 0        | 0        | 0        | 0         | 0         | 0         | 0         | 0         |
| Veillonella dispar/parvula                                            | 0        | 0        | 0        | 0        | 0        | 0        | 0        | 0        | 0        | 0        | 0        | 0        | 0        | 0        | 0        | 0         | 0         | 0         | 0         | 0         |
| Veillonella montpellierensis                                          | 0        | 0        | 0        | 0        | 0        | 0        | 0        | 0        | 0        | 0        | 0        | 0        | 0        | 0        | 0        | 0         | 0         | 0         | 0         | 0         |
| Williamsia faeni/muralis                                              | 0        | 0        | 0        | 0        | 0        | 0        | 0        | 0        | 0        | 0        | 0        | 0        | 0        | 0        | 0        | 0         | 0         | 0         | 0         | 0         |
| Zoogloea resiniphila                                                  | 0        | 0        | 0        | 0        | 0        | 0        | 0        | 0        | 0        | 0        | 0        | 0        | 0        | 0        | 0        | 0         | 0         | 0         | 0         | 0         |

# Water\_105 - Water\_122

| Species                                                | water_105 | water_106 | water_107 | water_108 | water_109 | water_110 | water_111 | water_112 | water_113 | water_114 | water_115 | water_116 | water_117 | water_118 | water_119 | water_120 | water_121 | water_122 |
|--------------------------------------------------------|-----------|-----------|-----------|-----------|-----------|-----------|-----------|-----------|-----------|-----------|-----------|-----------|-----------|-----------|-----------|-----------|-----------|-----------|
| [Clostridium] hiranonis                                | 0         | 0         | 0         | 0         | 0         | 0         | 0         | 0         | 0         | 0         | 0         | 0         | 0         | 0         | 0         | 0         | 0         | 0         |
| Acidovorax/Undibacterium                               | 0         | 0         | 0         | 0         | 0         | 0         | 0         | 0         | 0         | 0         | 0         | 0         | 0         | 0         | 0         | 0         | 0         | 0         |
| Acinetobacter haemolyticus/johnsonii                   | 0         | 0         | 0         | 0         | 0         | 0         | 0         | 0         | 0         | 0         | 0         | 0         | 0         | 0         | 0         | 0         | 0         | 0         |
| Acinetobacter haemolyticus/schindleri                  | 0         | 0         | 0         | 0         | 0         | 0         | 0         | 0         | 0         | 0         | 0         | 0         | 0         | 0         | 0         | 0         | 0         | 0         |
| Acinetobacter parvus                                   | 0         | 0         | 0         | 0         | 0         | 0         | 0         | 0         | 0         | 0         | 0         | 0         | 0         | 0         | 0         | 0         | 0         | 0         |
| Acinetobacter proteolyticus                            | 0         | 0         | 0         | 0         | 0         | 0         | 0         | 0         | 0         | 0         | 0         | 0         | 0         | 0         | 0         | 0         | 0         | 0         |
| Acinetobacter schindleri                               | 0         | 0         | 0         | 0         | 0         | 0         | 0         | 0         | 0         | 0         | 0         | 0         | 0         | 0         | 0         | 0         | 0         | 0         |
| Actinomyces oris/viscosus                              | 0         | 0         | 0         | 0         | 0         | 0         | 0         | 0         | 0         | 0         | 0         | 0         | 0         | 0         | 0         | 0         | 0         | 0         |
| Aerococcus urinaeequi/viridans                         | 0         | 0         | 0         | 0         | 0         | 0         | 0         | 12        | 0         | 0         | 0         | 0         | 0         | 0         | 0         | 0         | 0         | 0         |
| Aeromonas caviae                                       | 0         | 0         | 0         | 0         | 0         | 0         | 0         | 0         | 0         | 0         | 0         | 0         | 0         | 0         | 0         | 0         | 0         | 0         |
| Aeromonas veronii                                      | 0         | 0         | 0         | 0         | 0         | 0         | 0         | 0         | 0         | 0         | 0         | 0         | 0         | 0         | 0         | 0         | 0         | 0         |
| Afipia                                                 | 0         | 0         | 0         | 0         | 0         | 0         | 0         | 0         | 0         | 0         | 0         | 0         | 0         | 0         | 0         | 0         | 0         | 0         |
| Aggregatibacter aphrophilus                            | 0         | 0         | 0         | 0         | 0         | 0         | 0         | 0         | 0         | 0         | 0         | 0         | 0         | 0         | 0         | 0         | 0         | 0         |
| Alishewanella                                          | 0         | 0         | 0         | 0         | 0         | 0         | 0         | 0         | 0         | 0         | 0         | 0         | 0         | 0         | 0         | 0         | 0         | 0         |
| Alloiooccus                                            | 0         | 0         | 0         | 0         | 0         | 0         | 0         | 0         | 0         | 0         | 0         | 0         | 0         | 0         | 0         | 0         | 0         | 0         |
| Altererythrobacter epoxidivorans                       | 0         | 0         | 0         | 0         | 0         | 0         | 0         | 0         | 0         | 0         | 0         | 0         | 0         | 0         | 0         | 0         | 0         | 0         |
| Anaerococcus                                           | 0         | 0         | 7         | 0         | 0         | 0         | 0         | 0         | 0         | 0         | 0         | 0         | 0         | 0         | 0         | 0         | 0         | 0         |
| Anaerococcus lactolyticus                              | 0         | 0         | 0         | 0         | 0         | 0         | 0         | 0         | 0         | 0         | 0         | 0         | 0         | 0         | 0         | 0         | 0         | 0         |
| Anaerococcus octavius                                  | 0         | 0         | 0         | 0         | 0         | 0         | 0         | 0         | 0         | 0         | 0         | 0         | 0         | 0         | 0         | 0         | 0         | 0         |
| Anaerococcus prevotii/tetradius                        | 0         | 0         | 0         | 0         | 0         | 0         | 0         | 0         | 0         | 0         | 0         | 0         | 0         | 0         | 0         | 0         | 0         | 7         |
| Anaeromyxobacter                                       | 0         | 0         | 0         | 0         | 0         | 0         | 0         | 0         | 0         | 0         | 0         | 0         | 0         | 0         | 0         | 0         | 0         | 0         |
| Arenimonas                                             | 0         | 0         | 0         | 0         | 0         | 0         | 0         | 0         | 0         | 0         | 0         | 0         | 0         | 0         | 0         | 0         | 0         | 0         |
| Atopobium vaginae                                      | 0         | 0         | 0         | 0         | 0         | 0         | 0         | 0         | 0         | 0         | 0         | 0         | 0         | 0         | 0         | 0         | 0         | 0         |
| Bacillaceae                                            | 0         | 0         | 0         | 0         | 0         | 0         | 0         | 0         | 0         | 0         | 0         | 0         | 0         | 0         | 0         | 0         | 0         | 0         |
| Bacillus dakarensis                                    | 0         | 0         | 0         | 0         | 0         | 0         | 0         | 0         | 0         | 0         | 0         | 0         | 0         | 0         | 0         | 0         | 0         | 0         |
| Bacillus foraminis                                     | 0         | 0         | 0         | 0         | 0         | 0         | 0         | 0         | 0         | 0         | 0         | 0         | 0         | 0         | 0         | 0         | 0         | 0         |
| Bacillus idriensis                                     | 0         | 0         | 0         | 0         | 0         | 0         | 0         | 0         | 0         | 0         | 0         | 0         | 0         | 0         | 0         | 0         | 0         | 0         |
| Bacillus malikii                                       | 0         | 0         | 0         | 0         | 0         | 0         | 0         | 0         | 0         | 0         | 0         | 0         | 0         | 0         | 0         | 0         | 0         | 0         |
| Bacteroidales                                          | 0         | 0         | 0         | 0         | 0         | 0         | 0         | 0         | 0         | 0         | 0         | 0         | 0         | 0         | 0         | 0         | 0         | 0         |
| Bergeyella                                             | 0         | 0         | 0         | 0         | 0         | 0         | 0         | 0         | 0         | 0         | 0         | 0         | 0         | 0         | 0         | 0         | 0         | 0         |
| Betaproteobacteria                                     | 0         | 0         | 0         | 0         | 0         | 0         | 0         | 0         | 0         | 0         | 0         | 0         | 0         | 0         | 0         | 0         | 0         | 0         |
| Blastococcus endophyticus                              | 0         | 0         | 0         | 0         | 0         | 0         | 0         | 0         | 0         | 0         | 0         | 0         | 0         | 0         | 0         | 0         | 0         | 0         |
| Brevibacterium                                         | 0         | 0         | 0         | 0         | 0         | 0         | 0         | 0         | 0         | 0         | 0         | 0         | 0         | 0         | 0         | 0         | 0         | 0         |
| Brevibacterium casei                                   | 0         | 0         | 0         | 0         | 0         | 0         | 0         | 0         | 0         | 0         | 0         | 0         | 0         | 0         | 0         | 0         | 0         | 0         |
| Brevibacterium ihuae                                   | 0         | 0         | 0         | 0         | 0         | 0         | 0         | 0         | 0         | 0         | 0         | 0         | 0         | 0         | 0         | 0         | 0         | 0         |
| Brevundimonas                                          | 0         | 0         | 0         | 0         | 0         | 0         | 0         | 0         | 0         | 0         | 0         | 0         | 0         | 0         | 0         | 0         | 0         | 0         |
| Brevundimonas vesicularis                              | 0         | 0         | 0         | 0         | 0         | 0         | 0         | 0         | 0         | 0         | 0         | 0         | 0         | 0         | 0         | 0         | 0         | 0         |
| Brevundimonas/Caulobacter                              | 0         | 0         | 0         | 0         | 0         | 0         | 0         | 0         | 0         | 0         | 0         | 0         | 0         | 0         | 0         | 0         | 0         | 0         |
| Burkholderia pyrrocinia/stabilis                       | 0         | 0         | 0         | 0         | 0         | 0         | 0         | 0         | 0         | 0         | 0         | 0         | 0         | 0         | 0         | 0         | 0         | 0         |
| Burkholderiales Genera incertae sedis                  | 0         | 0         | 0         | 0         | 0         | 0         | 0         | 6         | 0         | 0         | 0         | 0         | 0         | 0         | 0         | 0         | 0         | 0         |
| Campylobacter rectus/showae                            | 0         | 0         | 0         | 0         | 0         | 0         | 0         | 0         | 0         | 0         | 0         | 0         | 0         | 0         | 0         | 0         | 0         | 0         |
| Candidatus Saccharibacteria                            | 0         | 0         | 0         | 0         | 0         | 0         | 0         | 0         | 0         | 0         | 0         | 0         | 0         | 0         | 0         | 0         | 0         | 0         |
| Candidatus Saccharimonas                               | 0         | 0         | 0         | 0         | 0         | 0         | 0         | 0         | 0         | 0         | 0         | 0         | 0         | 0         | 0         | 0         | 0         | 0         |
| Capnocytophaga                                         | 0         | 0         | 0         | 0         | 0         | 0         | 0         | 0         | 0         | 0         | 0         | 0         | 0         | 0         | 0         | 0         | 0         | 0         |
| Cardiobacterium hominis                                | 0         | 0         | 0         | 0         | 0         | 0         | 0         | 0         | 0         | 0         | 0         | 0         | 0         | 0         | 0         | 0         | 0         | 0         |
| Carnobacteriaceae                                      | 0         | 0         | 0         | 0         | 0         | 0         | 0         | 0         | 0         | 0         | 0         | 0         | 0         | 0         | 0         | 0         | 0         | 0         |
| Carnobacterium inhibens/jeotgali                       | 0         | 0         | 0         | 0         | 0         | 0         | 0         | 0         | 0         | 0         | 0         | 0         | 0         | 0         | 0         | 0         | 0         | 0         |
| Casaltella massiliensis                                | 0         | 0         | 0         | 0         | 0         | 0         | 0         | 0         | 0         | 0         | 0         | 0         | 0         | 0         | 0         | 0         | 0         | 0         |
| Chelatococcus asaccharovorans                          | 0         | 0         | 0         | 0         | 0         | 0         | 0         | 0         | 0         | 0         | 0         | 0         | 0         | 0         | 0         | 0         | 0         | 0         |
| Chelatococcus/Methylobacterium                         | 0         | 0         | 0         | 0         | 0         | 0         | 0         | 0         | 0         | 0         | 0         | 0         | 0         | 0         | 0         | 0         | 0         | 0         |
| Chryseobacterium                                       | 0         | 0         | 0         | 0         | 0         | 0         | 0         | 0         | 0         | 0         | 0         | 0         | 0         | 0         | 0         | 0         | 0         | 0         |
| Chryseobacterium hominis                               | 0         | 0         | 0         | 0         | 0         | 0         | 0         | 0         | 0         | 0         | 0         | 0         | 0         | 0         | 0         | 0         | 0         | 0         |
| Chryseomicrobium amylolyticum                          | 0         | 0         | 0         | 0         | 0         | 0         | 0         | 0         | 0         | 0         | 0         | 0         | 0         | 0         | 0         | 0         | 0         | 0         |
| Cloacibacterium normanense                             | 0         | 0         | 0         | 0         | 0         | 0         | 0         | 0         | 0         | 0         | 0         | 0         | 0         | 0         | 0         | 0         | 0         | 0         |
| Clostridium                                            | 0         | 0         | 0         | 0         | 0         | 0         | 0         | 0         | 0         | 0         | 0         | 0         | 0         | 0         | 0         | 0         | 0         | 0         |
| Corynebacteriales                                      | 0         | 0         | 0         | 0         | 0         | 0         | 0         | 0         | 0         | 0         | 0         | 0         | 0         | 0         | 0         | 0         | 0         | 0         |
| Corynebacterium                                        | 0         | 6         | 0         | 0         | 0         | 0         | 0         | 0         | 0         | 0         | 0         | 0         | 0         | 0         | 0         | 0         | 0         | 0         |
| Corynebacterium accolens/macginleyi                    | 0         | 0         | 0         | 0         | 0         | 0         | 0         | 0         | 0         | 0         | 0         | 0         | 0         | 0         | 0         | 0         | 0         | 0         |
| Corynebacterium appendicis                             | 0         | 0         | 0         | 0         | 0         | 0         | 0         | 0         | 0         | 0         | 0         | 0         | 0         | 0         | 0         | 0         | 0         | 0         |
| Corynebacterium aurimucosum/minutissimum/singulare     | 0         | 0         | 0         | 0         | 0         | 0         | 0         | 0         | 0         | 22        | 0         | 0         | 0         | 0         | 0         | 0         | 0         | 0         |
| Corynebacterium coyleae                                | 0         | 0         | 0         | 0         | 0         | 0         | 0         | 0         | 0         | 25        | 0         | 0         | 0         | 0         | 0         | 0         | 0         | 0         |
| Corynebacterium furnierii/mucifaciens/ureicelerivorans | 0         | 0         | 0         | 0         | 0         | 0         | 0         | 0         | 0         | 0         | 0         | 0         | 0         | 0         | 0         | 0         | 0         | 0         |
| Corynebacterium hadale/imitans                         | 0         | 0         | 0         | 0         | 0         | 0         | 0         | 0         | 0         | 0         | 0         | 0         | 0         | 0         | 0         | 0         | 0         | 0         |
| Corynebacterium pollutisoli                            | 0         | 0         | 0         | 0         | 0         | 0         | 0         | 0         | 0         | 0         | 0         | 0         | 0         | 0         | 0         | 0         | 0         | 0         |
| Corynebacterium propinquum/pseudodiphtheriticum        | 0         | 0         | 0         | 0         | 0         | 0         | 0         | 0         | 0         | 0         | 0         | 0         | 0         | 0         | 0         | 0         | 0         | 0         |
| Corynebacterium pseudogenitalium/tuberculoostearicum   | 0         | 0         | 0         | 0         | 0         | 0         | 0         | 0         | 0         | 0         | 0         | 0         | 0         | 0         | 0         | 0         | 0         | 0         |
| Craurococcus roseus                                    | 0         | 0         | 0         | 0         | 0         | 0         | 0         | 0         | 0         | 0         | 0         | 0         | 0         | 0         | 0         | 0         | 0         | 0         |
| Curvibacter                                            | 0         | 0         | 0         | 0         | 0         | 0         | 0         | 0         | 0         | 0         | 0         | 0         | 0         | 0         | 0         | 0         | 0         | 0         |



# Water\_105 - Water\_122

| Species                                                               | water_105 | water_106 | water_107 | water_108 | water_109 | water_110 | water_111 | water_112 | water_113 | water_114 | water_115 | water_116 | water_117 | water_118 | water_119 | water_120 | water_121 | water_122 |
|-----------------------------------------------------------------------|-----------|-----------|-----------|-----------|-----------|-----------|-----------|-----------|-----------|-----------|-----------|-----------|-----------|-----------|-----------|-----------|-----------|-----------|
| Noviherbaspirillum                                                    | 0         | 0         | 0         | 0         | 0         | 0         | 0         | 0         | 0         | 0         | 0         | 0         | 0         | 0         | 0         | 0         | 0         | 0         |
| Novosphingobium pentaromativorans/resinovorum                         | 0         | 0         | 0         | 0         | 0         | 0         | 0         | 0         | 0         | 0         | 0         | 0         | 0         | 0         | 0         | 0         | 0         | 0         |
| Paenibacillus                                                         | 0         | 0         | 0         | 0         | 0         | 0         | 0         | 0         | 0         | 0         | 0         | 0         | 0         | 0         | 0         | 0         | 0         | 0         |
| Pantoea agglomerans/dispersa                                          | 0         | 0         | 0         | 0         | 0         | 0         | 0         | 0         | 0         | 0         | 0         | 0         | 0         | 0         | 0         | 0         | 0         | 0         |
| Pantoea stewartii                                                     | 0         | 0         | 0         | 0         | 0         | 0         | 0         | 0         | 0         | 0         | 0         | 0         | 0         | 0         | 0         | 0         | 0         | 0         |
| Paracoccus                                                            | 0         | 0         | 0         | 0         | 0         | 0         | 0         | 0         | 0         | 0         | 0         | 0         | 0         | 0         | 0         | 0         | 0         | 0         |
| Peptoniphilus asaccharolyticus/grossensis/harei/phoceensis/rhinitidis | 0         | 0         | 0         | 0         | 0         | 0         | 0         | 0         | 0         | 0         | 0         | 0         | 0         | 0         | 0         | 0         | 0         | 0         |
| Phycoccus                                                             | 0         | 0         | 0         | 0         | 0         | 0         | 0         | 0         | 0         | 0         | 0         | 0         | 0         | 0         | 0         | 0         | 0         | 0         |
| Pontibacter                                                           | 0         | 0         | 0         | 0         | 0         | 0         | 0         | 0         | 0         | 0         | 0         | 0         | 0         | 0         | 0         | 0         | 0         | 0         |
| Porphyromonas                                                         | 0         | 0         | 0         | 0         | 0         | 0         | 0         | 0         | 0         | 0         | 0         | 0         | 0         | 0         | 0         | 0         | 0         | 0         |
| Prevotella                                                            | 0         | 0         | 0         | 0         | 0         | 0         | 0         | 0         | 0         | 0         | 0         | 0         | 0         | 0         | 0         | 0         | 0         | 0         |
| Prevotella amnii                                                      | 0         | 0         | 0         | 0         | 0         | 0         | 0         | 0         | 0         | 0         | 0         | 0         | 0         | 0         | 0         | 0         | 0         | 0         |
| Prevotella disiens                                                    | 0         | 0         | 0         | 0         | 0         | 0         | 0         | 0         | 0         | 0         | 0         | 0         | 0         | 0         | 0         | 0         | 0         | 0         |
| Prevotella melaninogenica                                             | 0         | 0         | 0         | 0         | 0         | 0         | 0         | 0         | 0         | 0         | 0         | 0         | 0         | 0         | 0         | 0         | 0         | 0         |
| Prevotella timonensis                                                 | 0         | 0         | 5         | 0         | 0         | 0         | 0         | 0         | 0         | 0         | 0         | 0         | 0         | 0         | 0         | 0         | 0         | 0         |
| Pseudoclavibacter                                                     | 0         | 0         | 0         | 0         | 0         | 0         | 0         | 0         | 0         | 0         | 0         | 0         | 0         | 0         | 0         | 0         | 0         | 0         |
| Pseudomonas antarctica/fluorescens                                    | 0         | 0         | 0         | 0         | 0         | 0         | 0         | 0         | 0         | 0         | 0         | 0         | 0         | 0         | 0         | 0         | 0         | 0         |
| Pseudomonas baetica                                                   | 0         | 0         | 0         | 0         | 0         | 0         | 0         | 0         | 0         | 0         | 0         | 0         | 0         | 0         | 0         | 0         | 0         | 0         |
| Pseudomonas fluorescens/koreensis                                     | 0         | 0         | 0         | 0         | 0         | 0         | 0         | 0         | 0         | 0         | 0         | 0         | 0         | 0         | 0         | 0         | 0         | 0         |
| Pseudomonas gessardii                                                 | 0         | 0         | 0         | 0         | 0         | 0         | 0         | 0         | 0         | 0         | 0         | 0         | 0         | 0         | 0         | 0         | 0         | 0         |
| Pseudomonas monteilii                                                 | 0         | 0         | 0         | 0         | 0         | 0         | 0         | 0         | 0         | 0         | 0         | 0         | 0         | 0         | 0         | 0         | 0         | 0         |
| Pseudomonas oleovorans/pseudoalcaligenes group                        | 0         | 0         | 0         | 0         | 0         | 0         | 0         | 0         | 0         | 0         | 0         | 0         | 0         | 0         | 0         | 0         | 0         | 0         |
| Pseudomonas resinovorans                                              | 0         | 0         | 0         | 0         | 0         | 0         | 0         | 0         | 0         | 0         | 0         | 0         | 0         | 0         | 0         | 0         | 0         | 0         |
| Pseudomonas stutzeri group                                            | 0         | 0         | 0         | 0         | 0         | 0         | 0         | 0         | 0         | 0         | 0         | 0         | 0         | 0         | 0         | 0         | 0         | 0         |
| Pseudomonas stutzeri subgroup                                         | 0         | 0         | 0         | 0         | 0         | 0         | 0         | 0         | 0         | 0         | 0         | 0         | 0         | 0         | 0         | 0         | 0         | 0         |
| Pseudomonas veronii                                                   | 0         | 0         | 0         | 0         | 0         | 0         | 0         | 0         | 0         | 0         | 0         | 0         | 0         | 0         | 0         | 0         | 0         | 0         |
| Pseudoxanthomonas indica                                              | 0         | 0         | 0         | 0         | 0         | 0         | 0         | 0         | 0         | 0         | 0         | 0         | 0         | 0         | 0         | 0         | 0         | 0         |
| Pseudoxanthomonas mexicana                                            | 0         | 0         | 0         | 0         | 0         | 0         | 0         | 0         | 0         | 0         | 0         | 0         | 0         | 0         | 0         | 0         | 0         | 0         |
| Psychrobacter alimentarius                                            | 0         | 0         | 0         | 0         | 0         | 0         | 0         | 0         | 0         | 0         | 0         | 0         | 0         | 0         | 0         | 0         | 0         | 0         |
| Rheinheimera                                                          | 0         | 0         | 0         | 0         | 0         | 0         | 0         | 0         | 0         | 0         | 0         | 0         | 0         | 0         | 0         | 0         | 0         | 0         |
| Rheinheimera perlucida                                                | 0         | 0         | 0         | 0         | 0         | 0         | 0         | 0         | 0         | 0         | 0         | 0         | 0         | 0         | 0         | 0         | 0         | 0         |
| Rhodobacter                                                           | 0         | 0         | 0         | 0         | 0         | 0         | 0         | 0         | 0         | 0         | 0         | 0         | 0         | 0         | 0         | 0         | 0         | 0         |
| Rhodobacteraceae                                                      | 0         | 0         | 0         | 0         | 0         | 0         | 0         | 0         | 0         | 0         | 0         | 0         | 0         | 0         | 0         | 0         | 0         | 0         |
| Rhodococcus corynebacterioides/kroppenstedtii                         | 0         | 0         | 0         | 0         | 0         | 0         | 0         | 0         | 0         | 0         | 0         | 0         | 0         | 0         | 0         | 0         | 0         | 0         |
| Romboutsia timonensis                                                 | 0         | 0         | 0         | 0         | 0         | 0         | 0         | 0         | 0         | 0         | 0         | 0         | 0         | 0         | 0         | 0         | 0         | 0         |
| Rothia                                                                | 0         | 0         | 0         | 0         | 0         | 0         | 0         | 0         | 0         | 0         | 0         | 0         | 0         | 0         | 0         | 0         | 0         | 0         |
| Rothia amarae                                                         | 0         | 0         | 0         | 0         | 0         | 0         | 0         | 0         | 0         | 0         | 0         | 0         | 0         | 0         | 0         | 0         | 0         | 0         |
| Saccharopolyspora                                                     | 0         | 0         | 0         | 0         | 0         | 0         | 0         | 0         | 0         | 0         | 0         | 0         | 0         | 0         | 0         | 0         | 0         | 0         |
| Shigella/Escherichia                                                  | 0         | 0         | 0         | 0         | 0         | 0         | 0         | 0         | 0         | 0         | 0         | 0         | 0         | 0         | 0         | 0         | 0         | 0         |
| Sneathia                                                              | 0         | 0         | 0         | 0         | 0         | 0         | 0         | 0         | 0         | 0         | 0         | 0         | 0         | 0         | 0         | 0         | 0         | 0         |
| Sneathia amnii                                                        | 0         | 0         | 0         | 0         | 0         | 0         | 0         | 0         | 0         | 0         | 0         | 0         | 0         | 0         | 0         | 0         | 0         | 0         |
| Sneathia sanguinigena                                                 | 0         | 0         | 0         | 7         | 0         | 0         | 0         | 0         | 0         | 0         | 0         | 0         | 0         | 0         | 0         | 5         | 0         | 0         |
| Sphingobium yanoikuyae                                                | 0         | 0         | 0         | 0         | 0         | 0         | 0         | 0         | 0         | 0         | 0         | 0         | 0         | 0         | 0         | 0         | 0         | 0         |
| Sphingomonas kaistensis                                               | 0         | 0         | 0         | 0         | 0         | 0         | 0         | 0         | 0         | 0         | 0         | 0         | 0         | 0         | 0         | 0         | 0         | 0         |
| Sphingomonas starnbergensis                                           | 0         | 0         | 0         | 0         | 0         | 0         | 0         | 0         | 0         | 0         | 0         | 0         | 0         | 0         | 0         | 0         | 0         | 0         |
| Staphylococcus aureus                                                 | 0         | 0         | 0         | 0         | 0         | 0         | 0         | 0         | 0         | 0         | 0         | 0         | 0         | 0         | 0         | 0         | 0         | 0         |
| Staphylococcus capitis/caprae                                         | 0         | 0         | 0         | 0         | 0         | 0         | 0         | 0         | 0         | 0         | 0         | 0         | 0         | 0         | 0         | 0         | 0         | 0         |
| Staphylococcus caprae/cohnii/epidermidis                              | 0         | 0         | 12        | 0         | 0         | 0         | 0         | 0         | 0         | 0         | 4         | 0         | 0         | 0         | 0         | 0         | 0         | 0         |
| Staphylococcus cohnii/saprophyticus                                   | 0         | 0         | 0         | 0         | 0         | 0         | 0         | 0         | 0         | 0         | 0         | 0         | 0         | 0         | 0         | 0         | 0         | 0         |
| Staphylococcus epidermidis/hominis                                    | 0         | 0         | 0         | 0         | 0         | 0         | 0         | 0         | 0         | 0         | 0         | 0         | 0         | 0         | 0         | 0         | 0         | 0         |
| Staphylococcus equorum/saprophyticus/xylosus                          | 0         | 0         | 0         | 0         | 0         | 0         | 0         | 0         | 0         | 0         | 0         | 0         | 0         | 0         | 0         | 0         | 0         | 0         |
| Staphylococcus haemolyticus                                           | 0         | 0         | 0         | 0         | 0         | 0         | 8         | 0         | 0         | 0         | 0         | 0         | 0         | 0         | 0         | 0         | 0         | 0         |
| Streptococcus                                                         | 0         | 0         | 0         | 0         | 0         | 0         | 0         | 0         | 0         | 0         | 0         | 0         | 0         | 0         | 0         | 0         | 0         | 0         |
| Streptococcus agalactiae                                              | 0         | 0         | 0         | 11        | 0         | 0         | 0         | 0         | 9         | 0         | 0         | 0         | 0         | 0         | 0         | 0         | 0         | 5         |
| Streptococcus anginosus                                               | 0         | 0         | 0         | 0         | 0         | 0         | 0         | 0         | 0         | 0         | 0         | 0         | 0         | 0         | 0         | 0         | 0         | 0         |
| Streptococcus mitis group                                             | 12        | 22        | 30        | 39        | 0         | 17        | 0         | 16        | 0         | 0         | 10        | 20        | 10        | 24        | 16        | 37        | 0         | 16        |
| Thiopsedomonas                                                        | 0         | 0         | 0         | 0         | 0         | 0         | 0         | 0         | 0         | 0         | 0         | 0         | 0         | 0         | 0         | 0         | 0         | 0         |
| Turicella otitidis                                                    | 0         | 0         | 0         | 0         | 0         | 0         | 0         | 0         | 0         | 0         | 0         | 0         | 0         | 0         | 0         | 0         | 0         | 0         |
| unclassified Clostridiales                                            | 0         | 0         | 0         | 0         | 0         | 0         | 0         | 0         | 0         | 0         | 0         | 0         | 0         | 0         | 0         | 0         | 0         | 0         |
| Undibacterium                                                         | 0         | 0         | 0         | 0         | 0         | 0         | 0         | 0         | 0         | 0         | 0         | 0         | 0         | 0         | 0         | 0         | 0         | 0         |
| Variovorax gossypii                                                   | 0         | 0         | 0         | 0         | 0         | 0         | 0         | 0         | 0         | 0         | 0         | 0         | 0         | 0         | 0         | 0         | 0         | 0         |
| Veillonella                                                           | 0         | 0         | 0         | 0         | 0         | 0         | 0         | 0         | 0         | 0         | 0         | 0         | 0         | 0         | 0         | 0         | 0         | 0         |
| Veillonella dispar/parvula                                            | 0         | 0         | 0         | 0         | 0         | 0         | 0         | 0         | 0         | 0         | 0         | 0         | 0         | 0         | 0         | 0         | 0         | 0         |
| Veillonella montpellierensis                                          | 0         | 0         | 11        | 0         | 0         | 0         | 0         | 0         | 0         | 0         | 0         | 0         | 0         | 0         | 0         | 0         | 0         | 0         |
| Williamsia faeni/muralis                                              | 0         | 0         | 0         | 0         | 0         | 0         | 0         | 0         | 0         | 0         | 0         | 0         | 0         | 0         | 0         | 0         | 0         | 0         |
| Zoogloea resiniphila                                                  | 0         | 0         | 0         | 0         | 0         | 0         | 0         | 0         | 0         | 0         | 0         | 0         | 0         | 0         | 0         | 0         | 0         | 0         |

## Taxonomic Output of Sequence Read for Positive Controls

Positive Control: Mock Community 1

| Species                        | Read Count   | Relative Abundance |
|--------------------------------|--------------|--------------------|
| BVAB1                          | 17192        | 40.441             |
| Sneathia amnii                 | 5069         | 11.924             |
| Lactobacillus jensenii         | 2432         | 5.721              |
| Atopobium vaginae              | 2126         | 5.001              |
| Lactobacillus iners            | 2098         | 4.935              |
| Candidate Division TM7 vaginal | 2012         | 4.733              |
| Lactobacillus crispatus        | 1877         | 4.415              |
| Eggerthella sp. type 1         | 1786         | 4.201              |
| Prevotella timonensis          | 1697         | 3.992              |
| BVAB2 (species)                | 1588         | 3.736              |
| Mageeibacillus indolicus       | 1092         | 2.569              |
| Dialister micraerophilus       | 1065         | 2.505              |
| Aerococcus christensenii       | 1035         | 2.435              |
| Dialister sp. type 2           | 904          | 2.127              |
| Gardnerella vaginalis          | 414          | 0.974              |
| Sneathia                       | 46           | 0.108              |
| Megasphaera sp. type 1         | 43           | 0.101              |
| Shigella/Escherichia*          | 35           | 0.082              |
| <b>Total Reads</b>             | <b>42511</b> |                    |

All bacterial taxa in Mock Community 1 were detected.

\*Additional taxon detected - likely cross-contamination between wells

Positive Control: Mock Community 2

| Species                    | Read Count   | Relative Abundance |
|----------------------------|--------------|--------------------|
| Lactobacillus jensenii     | 2743         | 25.005             |
| Lactobacillus gasseri      | 2026         | 18.469             |
| Lactobacillus iners        | 1375         | 12.534             |
| Mageeibacillus indolicus   | 993          | 9.052              |
| Lactobacillus crispatus    | 992          | 9.043              |
| Megasphaera sp. type 2     | 879          | 8.013              |
| Aerococcus christensenii   | 508          | 4.631              |
| Prevotella bivia           | 462          | 4.211              |
| Atopobium vaginae          | 386          | 3.519              |
| Prevotella amnii           | 211          | 1.923              |
| Parvimonas                 | 205          | 1.869              |
| Prevotella timonensis      | 90           | 0.820              |
| Streptococcus mitis group* | 54           | 0.492              |
| Gardnerella vaginalis      | 46           | 0.419              |
| <b>Total Reads</b>         | <b>10970</b> |                    |

All bacterial taxa in Mock Community 2 were detected.

\*Additional taxon detected - likely cross-contamination between wells

## List of bacterial taxa filtered from the final dataset

|                                               |                                             |                                                     |                                                      |                                                 |
|-----------------------------------------------|---------------------------------------------|-----------------------------------------------------|------------------------------------------------------|-------------------------------------------------|
| Achromobacter aegrifaciens                    | Brevundimonas diminuta/naejangsanensis      | Labilithrix                                         | Phyllobacterium                                      | Rhodospirillales                                |
| Achromobacter aegrifaciens/marplatensis       | Brooklawnia                                 | Lelliottia amnigena/Kluyvera intermedia             | Phyllobacterium myrsinacearum                        | Robbsia                                         |
| Achromobacter denitrificans                   | Burkholderia cepacia/pyrrocinia             | Lelliottia nimipressuralis                          | Porphyrobacter neustonensis                          | Salinibacterium                                 |
| Achromobacter marplatensis                    | Burkholderia contaminans/metallica          | Loriellopsis                                        | Porphyrobacter neustonensis/tepidarius               | Salinibacterium xinjiangense                    |
| Achromobacter marplatensis/spanius            | Burkholderia vietnamiensis                  | Loriellopsis cavernicola                            | Povalibacter                                         | Scytonema tolypothrichoides                     |
| Acidibacter                                   | Candidatus Paraburkholderia calva           | Luteimonas                                          | Prolinoborus                                         | Sediminibacterium                               |
| Acidisphaera                                  | Candidatus Solibacter                       | Macrocooccus caseolyticus                           | Prolinoborus fasciculus/Acinetobacter lwoffii        | Serratia                                        |
| Acidovorax                                    | Caulobacter                                 | Melaminivora alkalimesophila                        | Pseudarthrobacter                                    | Serratia grimesii/liquefaciens                  |
| Acidovorax delafieldii                        | Cellulomonas                                | Mesorhizobium loti                                  | Pseudarthrobacter scleromae/Arthrobacter globiformis | Serratia grimesii/proteamaculans                |
| Acinetobacter albensis                        | Cellulomonas aerilata                       | Methylobacterium                                    | Pseudomonas                                          | Serratia liquefaciens                           |
| Acinetobacter bouvetii                        | Cellulomonas cellasea                       | Methylobacterium adhaesivum                         | Pseudomonas abietaniphila                            | Serratia marcescens                             |
| Acinetobacter guillouiae                      | Cellvibrio                                  | Methylobacterium adhaesivum/goesingense             | Pseudomonas asturiensis                              | Serratia marcescens/nematodiphila               |
| Acinetobacter gyllenbergii                    | Cellvibrio mixtus                           | Methylobacterium aerolatum                          | Pseudomonas baetica/granadensis                      | Serratia urelytica                              |
| Acinetobacter indicus                         | Chitinophagaceae                            | Methylobacterium fujiisawaense/radiotolerans/tardum | Pseudomonas balearica                                | Shinella                                        |
| Acinetobacter indicus/radioresistens          | Chryseomicrobium amyolyticum/imtechense     | Methylobacterium goesingense                        | Pseudomonas brenneri                                 | Sphaerobacter                                   |
| Acinetobacter kyonggiensis                    | Comamonadaceae                              | Methylobacterium chlorogatae                        | Pseudomonas chlororaphis group                       | Sphingobacterium kitahiroshimense               |
| Acinetobacter radioresistens                  | Comamonas                                   | Methylobacterium populi/zatmanii                    | Pseudomonas fluorescens                              | Sphingobacterium multivorum                     |
| Acinetobacter seohaensis/soli/towneri         | Comamonas aquatica                          | Microcooccus                                        | Pseudomonas fragi                                    | Sphingobacterium multivorum/siyangense          |
| Acinetobacter seohaensis/towneri              | Comamonas koreensis                         | Microcooccus cohnii                                 | Pseudomonas fragi/psychrophila                       | Sphingobium                                     |
| Acinetobacter soli                            | Corynebacterium marinum                     | Microcooccus flavus                                 | Pseudomonas gessardii/reactans                       | Sphingomonas                                    |
| Acinetobacter towneri                         | Craurococcus                                | Microcooccus yunnanensis                            | Pseudomonas guangdongensis                           | Sphingomonas alpina/sanxanigenens               |
| Afipia genosp._1/genosp._2                    | Cupriavidus metallidurans                   | Mitsuokella                                         | Pseudomonas koreensis                                | Sphingomonas aquatilis                          |
| Agrobacterium                                 | Cytophagales                                | Mitsuokella jalaludinii                             | Pseudomonas luteola                                  | Sphingomonas dokdonensis                        |
| Agrobacterium tumefaciens                     | Dechloromonas agitata                       | Mitsuokella multacida                               | Pseudomonas oryzae                                   | Sphingomonas dokdonensis/yantingensis           |
| Agrobacterium tumefaciens complex             | Deinococcus wulumuqensis                    | Modestobacter caceresii/multiseptatus               | Pseudomonas oryzihabitans                            | Sphingomonas echinoides                         |
| Agrobacterium/Beijerinckia                    | Deinococcus xinjiangensis                   | Mucilaginibacter                                    | Pseudomonas oryzihabitans/psychrotolerans            | Sphingomonas endophytica                        |
| Alcanivorax                                   | Delftia acidovorans/lacustris               | Neofamilia                                          | Pseudomonas plecoglossicida                          | Sphingomonas ginsenosidimitans/yunnanensis      |
| Aliicoccus                                    | Delftia lacustris/tsuruhatensis             | Nocardioideis                                       | Pseudomonas plecoglossicida/putida                   | Sphingomonas hankookensis/panni                 |
| Alishewanella aestuarii/agri                  | Deltaproteobacteria                         | Noviherbaspirillum canariense                       | Pseudomonas pseudoalcaligenes                        | Sphingomonas insulae/melonis                    |
| Alishewanella jeotgali                        | Devosia                                     | Novosphingobium                                     | Pseudomonas putida                                   | Sphingomonas leidyi                             |
| Alkanindiges                                  | Duganella zoogloeoides                      | Novosphingobium capsulatum                          | Pseudomonas putida/taiwanensis                       | Sphingomonas melonis                            |
| Alkanindiges illinoisensis                    | Dyadobacter                                 | Novosphingobium guangzhouense/resinovorum           | Pseudomonas stutzeri                                 | Sphingomonas polyaromaticivorans                |
| Altererythrobacter                            | Enhydrobacter                               | Novosphingobium lindaniclasticum                    | Pseudomonas stutzeri/xanthomarina                    | Sphingomonas sanxanigenens                      |
| Anoxybacillus                                 | Enterobacter ludwigii/Pantoea dispersa      | Novosphingobium panipatense                         | Pseudomonas taiwanensis                              | Sphingomonas yantingensis                       |
| Aquabacterium                                 | Euzebya                                     | Novosphingobium sediminicola                        | Pseudomonas xanthomarina/zhaodongensis               | Sphingomonas yunnanensis                        |
| Aridibacter                                   | Gaiella                                     | Novosphingobium subterraneum                        | Pseudoxanthomonas                                    | Sphingopyxis                                    |
| Arsenicococcus                                | Gemmata                                     | Oscillatoriales                                     | Psychrobacter faecalis                               | Sphingopyxis taejonensis                        |
| Arthrobacter ruscicus                         | Gemmobacter nectariphilus                   | Paeniclostridium                                    | Psychrobacter faecalis/pulmonis                      | Spirosoma                                       |
| Atlantibacter hermannii/Klebsiella pneumoniae | Geodermatophilaceae                         | Paracoccus aminovorans/chinensis/huijuniae          | PVC group/Terrabacteria group                        | Sporobacter                                     |
| Atlantibacter hermannii/Pantoea stewartii     | Geodermatophilus                            | Paracoccus chinensis                                | Ralstonia                                            | Stenotrophomonas                                |
| Atlantibacter/Klebsiella                      | Geodermatophilus/Blastococcus/Modestobacter | Paracoccus chinensis/denitrificans                  | Ralstonia insidiosa                                  | Stenotrophomonas maltophilia                    |
| Azoarcus                                      | Herbaspirillum                              | Paracoccus communis/denitrificans                   | Ralstonia mannitolilytica/pickettii                  | Stenotrophomonas maltophilia group              |
| Bacillus benzoevorans                         | Hydrogenispora                              | Paracoccus contaminans                              | Ralstonia mannitolilytica/solanacearum               | Streptococcus thermophilus                      |
| Bacillus niacini                              | Hydrogenophaga                              | Paracoccus denitrificans                            | Ralstonia pickettii                                  | Streptomyces albobriseolus/griseorubens/iakyrus |
| Bacillus psychrosaccharolyticus               | Hymenobacter                                | Paracoccus sediminis                                | Rhizobiaceae                                         | Tepidimicrobium                                 |
| Beijerinckia                                  | Hymenobacter perfusus                       | Pelistega                                           | Rhizobiales                                          | Terrabacteria group                             |
| Blastococcus                                  | Intrasporangiaceae                          | Pelomonas                                           | Rhizobium                                            | Undibacterium oligocarboniphilum                |
| Blastococcus saxosidens                       | Janthinobacterium agaricidamnorum           | Pelomonas puraquae                                  | Rhodobacter/Gemmobacter                              | Undibacterium squillarum                        |
| Blastomonas natatoria                         | Janthinobacterium lividum/svalbardensis     | Pelomonas saccharophila                             | Rhodobacter/Paracoccus                               | Vampirovibrio                                   |
| Brachybacterium                               | Jeotgalicoccus                              | Phenylobacterium                                    | Rhodococcus                                          | Variovorax                                      |
| Brachybacterium paraconglomeratum             | Knoellia subterranea                        | Phenylobacterium koreense                           | Rhodococcus erythropolis/qingshengii                 | Variovorax paradoxus                            |
| Brachybacterium squillarum                    | Kocuria marina                              | Photobacterium iliopiscarium/kishitanii/phosphoreum | Rhodocyclales                                        | Vogesella                                       |
| Bradyrhizobium                                | Kocuria marina/rhizophila                   | Photobacterium phosphoreum                          | Rhodopseudomonas                                     | Xanthomonadaceae                                |
| Bradyrhizobium canariense/erythroplei         | Kocuria palustris                           | Phreatobacter                                       | Rhodopseudomonas faecalis                            | Zoogloeaceae                                    |
| Bradyrhizobium elkanii/erythroplei            | Kocuria rhizophila                          | Phreatobacter oligotrophus                          | Rhodopseudomonas faecalis/palustris                  |                                                 |
