# Supplementary material
Source: PubMed Central journal article supplement (PMC8492123)
Supplement: ciaa1123_suppl_supplementary_table_02.pdf [file ciaa1123_suppl_supplementary_table_02.pdf]

Supplementary Table 2. Metadata for Individual Study Participants

| study_id | sexpartners  | seqid        | clean_ngu_status | ct_naat | mg_naat | adeno_result | hsv_result | tvag_presabs | mp_qpcr_present | hi_qpcr_present | uu_qpcr_present |
|----------|--------------|--------------|------------------|---------|---------|--------------|------------|--------------|-----------------|-----------------|-----------------|
| S01      | Female (MSW) | m12n701s505  | No               | N       | N       | N            | N          | N            | P               | P               | P               |
| S02      | Female (MSW) | m12n701s507  | No               | N       | P       | N            | N          | N            | N               | N               | N               |
| S03      | Female (MSW) | m12n701s511  | Yes              | N       | N       | N            | N          | N            | P               | N               | N               |
| S04      | Female (MSW) | m12n702s502  | No               | N       | N       | N            | N          | N            | N               | N               | N               |
| S05      | Female (MSW) | m12n702s503  | Yes              | P       | N       | N            | N          | N            | N               | N               | N               |
| S06      | Female (MSW) | m12n702s505  | No               | N       | N       | N            | N          | N            | N               | N               | P               |
| S07      | Female (MSW) | m12n702s506  | No               | N       | N       | N            | N          | N            | N               | N               | P               |
| S08      | Female (MSW) | m12n702s507  | No               | N       | N       | N            | N          | N            | N               | N               | P               |
| S09      | Female (MSW) | m12n702s508  | Yes              | N       | N       | N            | N          | N            | N               | N               | N               |
| S10      | Female (MSW) | m12n703s505  | No               | N       | N       | N            | N          | N            | N               | N               | P               |
| S11      | Female (MSW) | m12n703s507  | No               | N       | N       | N            | N          | N            | N               | N               | N               |
| S12      | Female (MSW) | m12n703s511  | Yes              | N       | P       | NA           | NA         | N            | N               | N               | P               |
| S13      | Female (MSW) |              | Yes              | N       | N       | N            | N          | N            | N               | N               | N               |
| S14      | Female (MSW) | m12n704s507  | No               | N       | N       | N            | N          | N            | N               | N               | N               |
| S15      | Female (MSW) | m12n704s510  | No               | N       | N       | N            | N          | N            | N               | N               | N               |
| S16      | Female (MSW) | m12n705s502  | Yes              | P       | N       | N            | N          | N            | N               | N               | N               |
| S17      | Female (MSW) |              | Yes              | N       | P       | N            | N          | N            | N               | N               | N               |
| S18      | Female (MSW) | m12n705s508  | No               | N       | N       | N            | N          | N            | N               | N               | N               |
| S19      | Female (MSW) | m12n706s502  | Yes              | N       | N       | N            | N          | P            | N               | N               | P               |
| S20      | Female (MSW) | m12n706s506  | No               | N       | N       | N            | N          | N            | N               | N               | P               |
| S21      | Female (MSW) | m12n707s510  | No               | N       | N       | N            | N          | N            | N               | N               | N               |
| S22      | Female (MSW) |              | Yes              | N       | P       | N            | N          | N            | N               | N               | N               |
| S23      | Female (MSW) | m12n711s507  | Yes              | N       | N       | NA           | NA         | N            | N               | P               | N               |
| S24      | Female (MSW) | m12n712s506  | No               | N       | N       | N            | N          | N            | N               | N               | P               |
| S25      | Female (MSW) |              | No               | N       | N       | N            | N          | N            | N               | N               | N               |
| S26      | Female (MSW) | m12n712s510  | No               | N       | N       | N            | N          | N            | N               | N               | N               |
| S27      | Female (MSW) | m12n714s502  | Yes              | N       | N       | N            | N          | N            | N               | P               | N               |
| S28      | Female (MSW) | m30n728-s516 | No               | N       | N       | NA           | NA         | N            | N               | N               | N               |
| S29      | Female (MSW) |              | Yes              | N       | N       | N            | N          | N            | N               | N               | N               |
| S30      | Female (MSW) | m12n718s506  | No               | N       | N       | N            | N          | N            | N               | N               | N               |
| S31      | Female (MSW) | m12n718s507  | Yes              | N       | N       | N            | N          | N            | N               | N               | P               |
| S32      | Female (MSW) | m12n718s508  | Yes              | N       | N       | N            | N          | N            | N               | P               | N               |
| S33      | Female (MSW) |              | Yes              | N       | N       | N            | N          | N            | N               | P               | N               |
| S34      | Female (MSW) | m30n710-s510 | Yes              | P       | N       | NA           | NA         | N            | N               | N               | N               |
| S35      | Female (MSW) | m12n719s503  | Yes              | N       | N       | N            | N          | N            | N               | N               | P               |
| S36      | Female (MSW) | m12n719s507  | No               | N       | N       | N            | N          | N            | N               | N               | N               |
| S37      | Female (MSW) |              | Yes              | N       | P       | N            | N          | N            | N               | N               | N               |
| S38      | Female (MSW) |              | No               | N       | N       | N            | N          | N            | N               | N               | N               |
| S39      | Female (MSW) | m12n719s508  | No               | N       | N       | N            | N          | N            | N               | N               | N               |
| S40      | Female (MSW) | m12n719s510  | No               | N       | N       | N            | N          | N            | N               | N               | N               |
| S41      | Female (MSW) | m30n710-s511 | No               | N       | N       | N            | N          | N            | N               | N               | P               |
| S42      | Female (MSW) |              | Yes              | N       | P       | N            | N          | N            | N               | N               | N               |
| S43      | Female (MSW) | m12n720s507  | Yes              | N       | N       | N            | N          | N            | N               | N               | P               |
| S44      | Female (MSW) | m12n720s508  | No               | N       | N       | N            | N          | P            | N               | N               | P               |
| S45      | Female (MSW) | m12n721s508  | Yes              | N       | P       | N            | N          | N            | N               | N               | N               |
| S46      | Female (MSW) |              | Yes              | P       | N       | N            | N          | N            | N               | N               | N               |
| S47      | Female (MSW) | m12n722s505  | Yes              | N       | N       | N            | N          | N            | N               | P               | N               |
| S48      | Female (MSW) | m12n722s506  | Yes              | P       | N       | N            | N          | N            | N               | N               | P               |
| S49      | Female (MSW) |              | No               | N       | N       | N            | N          | N            | N               | N               | N               |
| S50      | Female (MSW) | m12n722s511  | Yes              | N       | N       | N            | N          | N            | N               | P               | N               |
| S51      | Female (MSW) | m12n723s505  | Yes              | N       | N       | N            | N          | N            | N               | N               | N               |
| S52      | Female (MSW) | m12n723s506  | No               | N       | N       | N            | N          | N            | N               | N               | P               |
| S53      | Female (MSW) | m12n723s507  | No               | N       | N       | N            | N          | N            | N               | N               | N               |
| S54      | Female (MSW) | m12n724s502  | Yes              | P       | N       | N            | N          | N            | N               | N               | N               |
| S55      | Female (MSW) | m12n724s503  | Yes              | P       | N       | N            | N          | N            | N               | N               | P               |
| S56      | Female (MSW) | m12n724s506  | No               | N       | N       | N            | N          | N            | N               | N               | P               |
| S57      | Female (MSW) | m12n724s507  | Yes              | N       | P       | N            | N          | N            | N               | N               | N               |
| S58      | Female (MSW) | m12n726s503  | No               | N       | N       | N            | N          | N            | N               | N               | N               |
| S59      | Female (MSW) | m12n727s503  | Yes              | N       | P       | N            | N          | N            | N               | N               | N               |

| study_id | sexpartners  | seqid        | clean_ngu_status | ct_naat | mg_naat | adeno_result | hsv_result | tvag_presabs | mp_qpcr_present | hi_qpcr_present | uu_qpcr_present |
|----------|--------------|--------------|------------------|---------|---------|--------------|------------|--------------|-----------------|-----------------|-----------------|
| S60      | Female (MSW) | m12n727s505  | No               | N       | N       | N            | N          | N            | N               | N               | N               |
| S61      | Female (MSW) | m12n727s508  | Yes              | N       | P       | N            | N          | N            | N               | N               | P               |
| S62      | Female (MSW) | m12n727s510  | No               | N       | N       | N            | N          | N            | N               | N               | N               |
| S63      | Female (MSW) |              | Yes              | N       | N       | N            | N          | N            | N               | N               | N               |
| S64      | Female (MSW) | m30n711-s502 | No               | N       | N       | NA           | NA         | NA           | NA              | NA              | NA              |
| S65      | Female (MSW) | m30n711-s503 | Yes              | N       | N       | NA           | NA         | P            | N               | N               | N               |
| S66      | Female (MSW) | m12n728s505  | No               | N       | N       | N            | N          | N            | N               | N               | N               |
| S67      | Female (MSW) | m12n728s506  | Yes              | N       | N       | N            | N          | N            | N               | N               | N               |
| S68      | Female (MSW) | m12n728s508  | No               | N       | N       | N            | N          | N            | N               | N               | N               |
| S69      | Female (MSW) |              | No               | N       | N       | N            | N          | N            | N               | N               | N               |
| S70      | Female (MSW) | m12n704s522  | No               | N       | N       | N            | N          | N            | N               | N               | P               |
| S71      | Female (MSW) | m12n705s520  | No               | N       | N       | N            | N          | N            | N               | N               | P               |
| S72      | Female (MSW) | m12n705s521  | Yes              | P       | N       | N            | N          | N            | N               | N               | P               |
| S73      | Female (MSW) | m12n705s522  | No               | N       | N       | N            | N          | N            | N               | N               | P               |
| S74      | Female (MSW) | m12n706s515  | Yes              | P       | P       | N            | N          | N            | N               | N               | N               |
| S75      | Female (MSW) | m12n706s516  | Yes              | P       | N       | N            | N          | N            | N               | N               | N               |
| S76      | Female (MSW) | m12n706s517  | Yes              | P       | N       | N            | N          | N            | N               | N               | N               |
| S77      | Female (MSW) | m12n706s520  | Yes              | P       | N       | N            | N          | N            | N               | N               | N               |
| S78      | Female (MSW) | m12n706s521  | No               | N       | N       | N            | N          | N            | N               | N               | N               |
| S79      | Female (MSW) |              | Yes              | P       | N       | N            | N          | NA           | NA              | NA              | NA              |
| S80      | Female (MSW) | m12n707s513  | Yes              | N       | P       | N            | N          | N            | N               | N               | N               |
| S81      | Female (MSW) | m12n707s515  | Yes              | N       | N       | N            | N          | N            | N               | P               | N               |
| S82      | Female (MSW) | m30n711-s505 | No               | N       | N       | N            | N          | N            | N               | N               | N               |
| S83      | Female (MSW) |              | Yes              | N       | N       | N            | N          | N            | N               | N               | P               |
| S84      | Female (MSW) | m30n711-s506 | No               | N       | N       | N            | N          | N            | N               | N               | N               |
| S85      | Female (MSW) | m30n711-s507 | No               | N       | N       | N            | N          | N            | N               | N               | N               |
| S86      | Female (MSW) | m30n711-s508 | No               | N       | N       | N            | N          | N            | N               | N               | P               |
| S87      | Female (MSW) | m30n711-s510 | No               | N       | N       | N            | N          | N            | N               | N               | N               |
| S88      | Female (MSW) | m30n711-s511 | No               | N       | N       | N            | N          | N            | N               | N               | N               |
| S89      | Female (MSW) |              | Yes              | N       | N       | N            | N          | N            | N               | N               | N               |
| S90      | Female (MSW) | m30n712-s503 | No               | N       | N       | N            | N          | N            | N               | N               | N               |
| S91      | Female (MSW) | m30n712-s505 | No               | N       | N       | N            | N          | N            | N               | N               | N               |
| S92      | Female (MSW) | m30n712-s506 | No               | N       | N       | N            | N          | N            | N               | N               | N               |
| S93      | Female (MSW) |              | Yes              | N       | N       | N            | N          | N            | N               | N               | P               |
| S94      | Female (MSW) | m30n712-s507 | No               | N       | N       | N            | N          | N            | N               | N               | N               |
| S95      | Female (MSW) | m30n712-s508 | No               | N       | N       | N            | N          | N            | N               | N               | N               |
| S96      | Female (MSW) | m30n723-s502 | No               | N       | N       | NA           | NA         | NA           | NA              | NA              | NA              |
| S97      | Female (MSW) | m30n723-s503 | No               | N       | N       | N            | N          | N            | N               | N               | N               |
| S98      | Female (MSW) |              | Yes              | P       | N       | N            | N          | N            | N               | N               | N               |
| S99      | Female (MSW) |              | Yes              | P       | N       | N            | N          | N            | N               | N               | N               |
| S100     | Female (MSW) | m30n723-s505 | Yes              | N       | N       | N            | N          | N            | N               | N               | P               |
| S101     | Female (MSW) |              | Yes              | N       | P       | N            | N          | N            | N               | N               | N               |
| S102     | Female (MSW) |              | Yes              | P       | N       | N            | N          | N            | N               | N               | N               |
| S103     | Female (MSW) | m30n723-s506 | No               | N       | N       | N            | N          | N            | N               | N               | P               |
| S104     | Female (MSW) | m30n723-s507 | No               | N       | P       | N            | N          | N            | N               | N               | P               |
| S105     | Female (MSW) |              | Yes              | N       | N       | N            | N          | N            | N               | N               | P               |
| S106     | Female (MSW) | m30n723-s508 | Yes              | N       | P       | N            | N          | N            | N               | N               | N               |
| S107     | Female (MSW) |              | Yes              | N       | N       | N            | N          | P            | N               | N               | N               |
| S108     | Female (MSW) | m30n723-s510 | No               | N       | N       | N            | N          | N            | N               | N               | P               |
| S109     | Female (MSW) | m30n723-s511 | Yes              | N       | N       | N            | N          | N            | N               | P               | N               |
| S110     | Female (MSW) | m30n724-s502 | Yes              | N       | N       | N            | N          | N            | N               | N               | N               |
| S111     | Female (MSW) | m30n724-s503 | No               | N       | N       | N            | N          | N            | N               | N               | P               |
| S112     | Female (MSW) | m30n728-s502 | Yes              | N       | N       | NA           | NA         | P            | N               | N               | N               |
| S113     | Female (MSW) | m30n724-s505 | No               | N       | N       | N            | N          | N            | N               | N               | P               |
| S114     | Female (MSW) | m30n724-s506 | Yes              | N       | N       | N            | N          | N            | N               | N               | P               |
| S115     | Female (MSW) | m30n724-s507 | Yes              | P       | N       | N            | N          | N            | N               | N               | N               |
| S116     | Female (MSW) | m30n711-s513 | No               | N       | N       | N            | N          | N            | N               | N               | N               |
| S117     | Female (MSW) | m30n724-s508 | Yes              | N       | N       | N            | N          | P            | N               | N               | N               |
| S118     | Female (MSW) | m30n711-s515 | No               | N       | N       | N            | N          | P            | N               | N               | N               |
| S119     | Female (MSW) | m30n711-s516 | Yes              | N       | N       | N            | N          | P            | N               | P               | N               |



| study_id | sexpartners  | seqid        | clean_ngu_status | ct_naat | mg_naat | adeno_result | hsv_result | tvag_presabs | mp_qpcr_present | hi_qpcr_present | uu_qpcr_present |
|----------|--------------|--------------|------------------|---------|---------|--------------|------------|--------------|-----------------|-----------------|-----------------|
| S180     | Female (MSW) | m49n704-s520 | No               | N       | N       | N            | N          | N            | N               | N               | N               |
| S181     | Female (MSW) | m49n704-s521 | No               | N       | N       | N            | N          | N            | N               | N               | N               |
| S182     | Female (MSW) |              | Yes              | N       | P       | N            | N          | N            | N               | N               | N               |
| S183     | Female (MSW) | m49n704-s522 | Yes              | N       | N       | N            | N          | N            | N               | N               | N               |
| S184     | Female (MSW) | m49n705-s513 | No               | N       | N       | N            | N          | N            | N               | N               | N               |
| S185     | Female (MSW) | m49n705-s516 | Yes              | P       | N       | N            | N          | N            | N               | N               | P               |
| S186     | Female (MSW) | m12n707s516  | Yes              | N       | N       | N            | N          | N            | N               | N               | P               |
| S187     | Male (MSM)   | m12n707s517  | No               | N       | N       | N            | N          | N            | N               | N               | N               |
| S188     | Male (MSM)   |              | Yes              | P       | N       | N            | N          | N            | P               | N               | N               |
| S189     | Male (MSM)   |              | No               | N       | N       | N            | N          | N            | N               | N               | N               |
| S190     | Female (MSW) | m12n707s520  | No               | N       | N       | N            | N          | N            | N               | N               | P               |
| S191     | Male (MSM)   | m12n710s513  | No               | N       | N       | N            | N          | N            | N               | N               | N               |
| S192     | Female (MSW) | m12n710s515  | No               | N       | N       | N            | N          | N            | N               | N               | N               |
| S193     | Male (MSM)   | m12n710s517  | No               | N       | N       | N            | N          | N            | N               | N               | P               |
| S194     | Male (MSM)   | m12n710s520  | No               | N       | N       | N            | N          | N            | N               | P               | N               |
| S195     | Male (MSM)   |              | No               | N       | P       | N            | N          | N            | N               | N               | N               |
| S196     | Female (MSW) | m12n710s521  | No               | N       | N       | N            | N          | N            | N               | N               | N               |
| S197     | Male (MSM)   | m12n710s522  | No               | N       | N       | N            | N          | N            | N               | N               | N               |
| S198     | Male (MSM)   | m30n701-s505 | Yes              | N       | N       | N            | N          | N            | N               | N               | N               |
| S199     | Male (MSM)   | m12n711s513  | No               | N       | N       | N            | N          | N            | N               | N               | N               |
| S200     | Male (MSM)   | m12n711s515  | No               | N       | N       | N            | N          | N            | N               | N               | N               |
| S201     | Male (MSM)   | m12n711s517  | No               | N       | N       | N            | N          | N            | N               | N               | N               |
| S202     | Male (MSM)   | m12n711s520  | No               | N       | N       | N            | N          | N            | N               | N               | N               |
| S203     | Female (MSW) | m12n711s521  | No               | N       | N       | N            | N          | N            | N               | N               | N               |
| S204     | Female (MSW) |              | Yes              | N       | N       | N            | N          | N            | N               | P               | N               |
| S205     | Female (MSW) | m12n711s522  | No               | N       | N       | N            | N          | N            | N               | N               | N               |
| S206     | Male (MSM)   | m12n712s515  | Yes              | N       | N       | N            | N          | N            | N               | N               | N               |
| S207     | Male (MSM)   | m12n712s516  | No               | N       | N       | N            | N          | N            | N               | N               | P               |
| S208     | Female (MSW) | m12n712s521  | No               | N       | N       | N            | N          | N            | N               | N               | N               |
| S209     | Male (MSM)   | m12n712s522  | No               | N       | N       | N            | N          | N            | N               | N               | N               |
| S210     | Male (MSM)   | m12n714s515  | Yes              | N       | N       | N            | N          | N            | N               | P               | N               |
| S211     | Female (MSW) | m12n714s516  | Yes              | N       | N       | N            | N          | N            | N               | P               | N               |
| S212     | Male (MSM)   | m12n714s517  | Yes              | N       | P       | N            | N          | N            | N               | N               | P               |
| S213     | Female (MSW) | m12n714s520  | No               | N       | N       | N            | N          | N            | N               | N               | N               |
| S214     | Female (MSW) |              | Yes              | N       | N       | N            | N          | N            | N               | N               | N               |
| S215     | Female (MSW) | m12n714s521  | No               | N       | N       | N            | N          | N            | N               | N               | N               |
| S216     | Male (MSM)   | m12n714s522  | Yes              | N       | P       | N            | N          | N            | N               | N               | N               |
| S217     | Male (MSM)   | m12n716s517  | No               | N       | N       | N            | N          | N            | N               | N               | N               |
| S218     | Male (MSM)   | m12n716s518  | Yes              | N       | N       | N            | N          | N            | P               | N               | P               |
| S219     | Male (MSM)   | m12n716s521  | No               | N       | N       | N            | N          | N            | N               | N               | N               |
| S220     | Male (MSM)   |              | No               | N       | N       | N            | N          | N            | N               | N               | N               |
| S221     | Male (MSM)   |              | Yes              | N       | N       | N            | N          | N            | N               | N               | N               |
| S222     | Male (MSM)   | m12n718s513  | No               | N       | N       | N            | N          | N            | N               | N               | N               |
| S223     | Male (MSM)   | m12n718s515  | Yes              | N       | N       | P            | N          | N            | N               | N               | N               |
| S224     | Female (MSW) | m12n718s516  | Yes              | N       | N       | N            | N          | N            | N               | N               | N               |
| S225     | Male (MSM)   | m12n718s517  | No               | N       | N       | N            | N          | N            | N               | N               | N               |
| S226     | Female (MSW) | m12n718s518  | No               | N       | N       | N            | N          | N            | N               | N               | N               |
| S227     | Female (MSW) | m12n718s520  | No               | N       | N       | N            | N          | N            | N               | N               | N               |
| S228     | Female (MSW) |              | Yes              | N       | N       | P            | N          | N            | N               | N               | N               |
| S229     | Male (MSM)   | m12n718s521  | Yes              | N       | N       | N            | N          | N            | P               | N               | N               |
| S230     | Male (MSM)   | m12n718s522  | Yes              | P       | N       | N            | N          | N            | N               | P               | N               |
| S231     | Female (MSW) | m12n719s520  | Yes              | P       | P       | N            | N          | N            | N               | N               | N               |
| S232     | Female (MSW) | m12n719s515  | No               | N       | N       | N            | N          | N            | N               | N               | N               |
| S233     | Male (MSM)   | m12n719s516  | Yes              | P       | N       | N            | N          | N            | N               | N               | N               |
| S234     | Male (MSM)   |              | Yes              | P       | N       | N            | N          | N            | N               | N               | N               |
| S235     | Female (MSW) | m12n719s517  | No               | N       | N       | N            | N          | N            | N               | N               | N               |
| S236     | Female (MSW) | m12n719s518  | No               | N       | N       | N            | N          | N            | N               | N               | N               |
| S237     | Male (MSM)   |              | Yes              | N       | N       | N            | N          | N            | P               | N               | N               |
| S238     | Male (MSM)   | m12n719s521  | Yes              | P       | N       | N            | N          | N            | N               | N               | P               |
| S239     | Male (MSM)   | m12n719s522  | Yes              | P       | N       | N            | N          | N            | N               | N               | N               |

| study_id | sexpartners  | seqid        | clean_ngu_status | ct_naat | mg_naat | adeno_result | hsv_result | tvag_presabs | mp_qpcr_present | hi_qpcr_present | uu_qpcr_present |
|----------|--------------|--------------|------------------|---------|---------|--------------|------------|--------------|-----------------|-----------------|-----------------|
| S240     | Male (MSM)   |              | Yes              | N       | P       | N            | N          | N            | N               | N               | N               |
| S241     | Male (MSM)   | m12n720s513  | Yes              | N       | N       | N            | N          | N            | P               | N               | N               |
| S242     | Female (MSW) |              | Yes              | P       | N       | N            | N          | N            | N               | N               | N               |
| S243     | Female (MSW) | m12n720s515  | No               | N       | N       | N            | N          | N            | N               | N               | N               |
| S244     | Male (MSM)   | m12n720s517  | Yes              | N       | N       | N            | N          | N            | N               | N               | N               |
| S245     | Male (MSM)   | m12n720s518  | Yes              | N       | N       | N            | N          | N            | N               | P               | P               |
| S246     | Male (MSM)   | m12n720s520  | Yes              | P       | N       | N            | N          | N            | N               | N               | N               |
| S247     | Female (MSW) | m12n720s521  | No               | N       | N       | N            | N          | N            | N               | N               | P               |
| S248     | Male (MSM)   |              | Yes              | N       | P       | N            | N          | N            | N               | N               | N               |
| S249     | Female (MSW) | m12n720s522  | No               | N       | N       | N            | N          | N            | N               | N               | P               |
| S250     | Female (MSW) | m12n721s513  | Yes              | N       | P       | N            | N          | N            | N               | N               | N               |
| S251     | Male (MSM)   | m12n721s515  | Yes              | N       | N       | N            | N          | N            | N               | N               | N               |
| S252     | Male (MSM)   | m12n721s518  | Yes              | N       | P       | N            | N          | N            | N               | N               | N               |
| S253     | Female (MSW) | m12n721s520  | Yes              | N       | N       | N            | N          | N            | N               | N               | N               |
| S254     | Male (MSM)   | m12n721s522  | Yes              | N       | P       | N            | N          | N            | N               | N               | N               |
| S255     | Female (MSW) | m12n722s513  | No               | N       | N       | N            | N          | N            | N               | N               | N               |
| S256     | Female (MSW) | m12n722s515  | Yes              | N       | N       | N            | N          | N            | N               | N               | N               |
| S257     | Male (MSM)   | m12n722s516  | Yes              | P       | N       | N            | N          | N            | N               | N               | N               |
| S258     | Female (MSW) | m12n722s518  | No               | N       | N       | P            | N          | N            | N               | N               | N               |
| S259     | Female (MSW) |              | Yes              | P       | N       | N            | N          | N            | N               | N               | N               |
| S260     | Male (MSM)   | m12n722s520  | Yes              | P       | N       | N            | N          | N            | P               | N               | N               |
| S261     | Female (MSW) | m12n722s522  | Yes              | N       | N       | N            | N          | N            | N               | N               | N               |
| S262     | Male (MSM)   | m12n723s513  | Yes              | N       | N       | N            | N          | N            | N               | N               | N               |
| S263     | Male (MSM)   |              | Yes              | P       | N       | N            | N          | N            | N               | N               | N               |
| S264     | Female (MSW) | m12n723s515  | Yes              | P       | N       | N            | N          | N            | N               | N               | P               |
| S265     | Female (MSW) |              | No               | N       | N       | N            | N          | N            | N               | N               | N               |
| S266     | Male (MSM)   | m30n707-s507 | Yes              | N       | N       | N            | N          | N            | N               | P               | N               |
| S267     | Male (MSM)   | m30n707-s508 | Yes              | P       | N       | N            | N          | N            | N               | N               | N               |
| S268     | Female (MSW) | m12n723s516  | Yes              | N       | N       | N            | N          | N            | N               | N               | N               |
| S269     | Female (MSW) | m12n723s517  | Yes              | N       | N       | N            | N          | N            | N               | N               | P               |
| S270     | Male (MSM)   | m30n716-s517 | Yes              | N       | N       | N            | N          | N            | N               | N               | N               |
| S271     | Female (MSW) | m12n723s518  | Yes              | N       | N       | N            | N          | N            | N               | N               | P               |
| S272     | Female (MSW) | m12n723s520  | No               | N       | N       | N            | N          | N            | N               | N               | N               |
| S273     | Female (MSW) | m12n723s521  | Yes              | P       | N       | N            | N          | N            | N               | N               | N               |
| S274     | Male (MSM)   | m30n718-s502 | Yes              | P       | P       | N            | N          | N            | N               | N               | P               |
| S275     | Female (MSW) |              | Yes              | P       | N       | N            | N          | N            | N               | N               | N               |
| S276     | Female (MSW) | m12n724s515  | Yes              | N       | N       | N            | N          | N            | N               | P               | N               |
| S277     | Female (MSW) | m12n724s516  | Yes              | N       | N       | N            | N          | N            | N               | N               | P               |
| S278     | Male (MSM)   |              | Yes              | P       | N       | N            | N          | N            | N               | N               | N               |
| S279     | Female (MSW) | m12n724s517  | Yes              | N       | N       | N            | P          | N            | N               | N               | N               |
| S280     | Female (MSW) |              | Yes              | N       | P       | N            | N          | N            | N               | N               | N               |
| S281     | Female (MSW) | m12n724s518  | Yes              | N       | N       | N            | N          | N            | N               | P               | N               |
| S282     | Female (MSW) | m12n724s520  | Yes              | N       | N       | N            | N          | N            | N               | P               | N               |
| S283     | Male (MSM)   | m30n726-s505 | Yes              | P       | N       | N            | N          | N            | N               | N               | N               |
| S284     | Female (MSW) |              | Yes              | P       | N       | N            | N          | N            | N               | N               | P               |
| S285     | Female (MSW) | m12n724s521  | Yes              | N       | N       | N            | N          | N            | N               | P               | N               |
| S286     | Female (MSW) | m12n724s522  | Yes              | N       | N       | N            | N          | N            | N               | N               | N               |
| S287     | Male (MSM)   |              | Yes              | P       | N       | N            | N          | N            | N               | N               | P               |
| S288     | Female (MSW) |              | Yes              | N       | N       | N            | N          | N            | N               | P               | N               |
| S289     | Female (MSW) | m12n726s513  | Yes              | P       | N       | N            | N          | N            | N               | N               | N               |
| S290     | Male (MSM)   | m30n726-s507 | Yes              | N       | N       | N            | N          | N            | P               | N               | P               |
| S291     | Male (MSM)   | m30n719-s505 | Yes              | N       | N       | N            | P          | N            | N               | N               | N               |
| S292     | Male (MSM)   | m30n719-s508 | Yes              | P       | N       | N            | N          | N            | N               | N               | P               |
| S293     | Male (MSM)   | m30n720-s502 | Yes              | N       | N       | P            | N          | N            | N               | N               | N               |
| S294     | Male (MSM)   |              | Yes              | N       | N       | N            | N          | N            | P               | N               | N               |
| S295     | Male (MSM)   | m30n720-s505 | Yes              | N       | N       | N            | N          | N            | N               | N               | N               |
| S296     | Male (MSM)   | m30n727-s502 | Yes              | N       | P       | NA           | NA         | N            | N               | N               | N               |
| S297     | Male (MSM)   | m30n721-s505 | Yes              | N       | N       | N            | N          | N            | N               | P               | N               |
| S298     | Male (MSM)   | m30n701-s516 | Yes              | N       | N       | N            | N          | N            | N               | N               | N               |
| S299     | Male (MSM)   | m30n702-s518 | Yes              | P       | N       | N            | N          | N            | N               | N               | N               |



| study_id | sexpartners | seqid        | clean_ngu_status | ct_naat | mg_naat | adeno_result | hsv_result | tvag_presabs | mp_qpcr_present | hi_qpcr_present | uu_qpcr_present |
|----------|-------------|--------------|------------------|---------|---------|--------------|------------|--------------|-----------------|-----------------|-----------------|
| S360     | Male (MSM)  | m49n719-s516 | No               | N       | N       | N            | N          | N            | N               | N               | N               |
| S361     | Male (MSM)  | m49n720-s515 | No               | N       | N       | N            | N          | N            | N               | N               | N               |
| S362     | Male (MSM)  | m49n720-s518 | No               | N       | N       | N            | N          | N            | N               | N               | P               |
| S363     | Male (MSM)  | m49n720-s521 | Yes              | N       | P       | N            | N          | N            | N               | N               | N               |
| S364     | Male (MSM)  | m49n720-s522 | Yes              | N       | P       | N            | N          | N            | N               | N               | P               |
| S365     | Male (MSM)  | m49n721-s513 | Yes              | N       | N       | N            | N          | N            | N               | N               | N               |
| S366     | Male (MSM)  | m49n721-s515 | Yes              | N       | P       | N            | N          | N            | N               | P               | N               |
| S367     | Male (MSM)  | m49n721-s516 | Yes              | N       | N       | N            | N          | N            | N               | N               | N               |
| S368     | Male (MSM)  | m49n721-s517 | Yes              | N       | N       | N            | N          | N            | N               | N               | N               |
| S369     | Male (MSM)  |              | Yes              | N       | N       | N            | N          | N            | N               | P               | N               |
| S370     | Male (MSM)  | m49n721-s522 | Yes              | P       | N       | N            | N          | N            | N               | N               | N               |
| S371     | Male (MSM)  | m49n722-s513 | Yes              | N       | N       | N            | N          | N            | N               | N               | N               |
| S372     | Male (MSM)  | m49n722-s516 | No               | N       | N       | N            | N          | N            | N               | N               | N               |
| S373     | Male (MSM)  | m49n722-s517 | No               | N       | N       | N            | N          | N            | N               | N               | N               |
| S374     | Male (MSM)  | m49n722-s518 | No               | N       | N       | N            | N          | N            | N               | N               | N               |
| S375     | Male (MSM)  | m49n722-s520 | Yes              | N       | N       | N            | N          | N            | N               | N               | N               |
| S376     | Male (MSM)  |              | Yes              | P       | N       | N            | N          | N            | N               | N               | N               |
| S377     | Male (MSM)  | m49n722-s521 | No               | N       | N       | N            | N          | N            | N               | N               | N               |
| S378     | Male (MSM)  | m49n722-s522 | No               | N       | N       | N            | N          | N            | N               | N               | N               |
| S379     | Male (MSM)  | m49n723-s513 | No               | N       | N       | N            | N          | N            | N               | N               | N               |
| S380     | Male (MSM)  | m49n723-s517 | No               | N       | N       | N            | N          | N            | N               | N               | N               |
| S381     | Male (MSM)  |              | No               | N       | N       | N            | N          | N            | N               | N               | N               |
| S382     | Male (MSM)  | m49n723-s518 | No               | N       | N       | N            | N          | N            | N               | N               | N               |
| S383     | Male (MSM)  |              | No               | N       | N       | N            | N          | N            | P               | N               | P               |
| S384     | Male (MSM)  | m49n723-s520 | No               | N       | N       | N            | N          | N            | N               | N               | N               |
| S385     | Male (MSM)  | m49n723-s521 | Yes              | N       | N       | N            | N          | N            | P               | N               | N               |
| S386     | Male (MSM)  | m49n723-s522 | Yes              | N       | P       | N            | N          | N            | N               | N               | N               |
| S387     | Male (MSM)  |              | Yes              | N       | N       | N            | N          | N            | P               | N               | N               |
| S388     | Male (MSM)  | m49n724-s513 | No               | N       | N       | N            | N          | N            | N               | N               | N               |
| S389     | Male (MSM)  |              | Yes              | N       | N       | N            | N          | N            | N               | N               | N               |
| S390     | Male (MSM)  | m49n724-s515 | No               | N       | N       | N            | N          | N            | N               | N               | P               |
| S391     | Male (MSM)  | m49n724-s516 | No               | N       | N       | N            | N          | N            | N               | N               | P               |
| S392     | Male (MSM)  | m49n724-s517 | No               | N       | N       | N            | N          | N            | N               | N               | N               |
| S393     | Male (MSM)  |              | No               | N       | N       | N            | N          | N            | N               | N               | N               |
| S394     | Male (MSM)  | m49n724-s518 | No               | N       | N       | N            | N          | N            | N               | N               | N               |
| S395     | Male (MSM)  |              | No               | N       | N       | N            | N          | N            | N               | N               | N               |
| S396     | Male (MSM)  | m49n724-s520 | No               | N       | N       | N            | N          | N            | N               | N               | N               |
| S397     | Male (MSM)  | m49n724-s521 | No               | N       | N       | N            | N          | N            | N               | N               | N               |
| S398     | Male (MSM)  |              | Yes              | P       | N       | N            | N          | N            | N               | N               | P               |
| S399     | Male (MSM)  | m49n724-s522 | Yes              | N       | N       | N            | N          | N            | N               | N               | N               |
| S400     | Male (MSM)  | m49n726-s515 | Yes              | N       | N       | N            | N          | N            | N               | N               | N               |
| S401     | Male (MSM)  | m49n726-s517 | No               | N       | N       | N            | N          | N            | N               | N               | N               |
| S402     | Male (MSM)  |              | No               | N       | N       | N            | N          | N            | N               | N               | N               |
| S403     | Male (MSM)  |              | No               | N       | P       | N            | N          | N            | N               | N               | N               |
| S404     | Male (MSM)  | m50n714-s502 | Yes              | P       | N       | N            | N          | N            | N               | N               | P               |
| S405     | Male (MSM)  | m50n714-s503 | No               | N       | N       | N            | N          | N            | N               | N               | P               |
| S406     | Male (MSM)  |              | Yes              | N       | P       | N            | N          | N            | N               | N               | N               |
| S407     | Male (MSM)  | m50n714-s505 | Yes              | N       | N       | N            | N          | N            | N               | N               | P               |
| S408     | Male (MSM)  | m50n714-s506 | Yes              | N       | N       | N            | N          | N            | N               | N               | N               |
| S409     | Male (MSM)  |              | No               | N       | N       | N            | N          | N            | N               | N               | N               |
| S410     | Male (MSM)  | m50n714-s507 | Yes              | N       | N       | N            | N          | N            | N               | P               | N               |
| S411     | Male (MSM)  | m50n714-s508 | Yes              | N       | P       | N            | N          | N            | N               | N               | N               |
| S412     | Male (MSM)  | m50n727-s510 | Yes              | N       | N       | N            | N          | N            | N               | N               | N               |
| S413     | Male (MSM)  | m50n727-s511 | No               | N       | N       | N            | N          | N            | N               | N               | N               |
| S414     | Male (MSM)  |              | No               | N       | N       | N            | N          | N            | N               | N               | N               |
| S415     | Male (MSM)  | m50n728-s502 | No               | N       | N       | N            | N          | N            | N               | N               | N               |
| S416     | Male (MSM)  | m50n728-s503 | Yes              | N       | P       | N            | N          | N            | N               | N               | N               |
| S417     | Male (MSM)  | m50n728-s505 | No               | N       | N       | N            | N          | N            | N               | N               | N               |
| S418     | Male (MSM)  | m50n728-s506 | Yes              | N       | N       | N            | N          | N            | N               | P               | N               |
| S419     | Male (MSM)  | m50n712-s522 | Yes              | P       | N       | N            | N          | N            | N               | N               | P               |

| study_id | sexpartners | seqid        | clean_ngu_status | ct_naat | mg_naat | adeno_result | hsv_result | tvag_presabs | mp_qpcr_present | hi_qpcr_present | uu_qpcr_present |
|----------|-------------|--------------|------------------|---------|---------|--------------|------------|--------------|-----------------|-----------------|-----------------|
| S420     | Male (MSM)  | m50n714-s513 | No               | N       | N       | N            | N          | N            | N               | N               | P               |
| S421     | Male (MSM)  | m50n714-s515 | Yes              | P       | N       | N            | N          | N            | N               | N               | N               |
| S422     | Male (MSM)  | m50n714-s516 | Yes              | N       | N       | N            | N          | N            | N               | N               | N               |
| S423     | Male (MSM)  |              | No               | N       | N       | N            | N          | N            | N               | P               | N               |
| S424     | Male (MSM)  | m50n714-s517 | No               | N       | N       | N            | N          | N            | N               | N               | N               |
| S425     | Male (MSM)  | m50n714-s518 | No               | N       | N       | N            | N          | N            | N               | N               | N               |
| S426     | Male (MSM)  | m50n714-s520 | Yes              | N       | N       | N            | N          | N            | N               | N               | N               |
| S427     | Male (MSM)  |              | Yes              | N       | N       | P            | N          | N            | N               | N               | N               |
| S428     | Male (MSM)  | m50n728-s513 | Yes              | N       | N       | N            | N          | N            | N               | P               | P               |
| S429     | Male (MSM)  |              | Yes              | P       | N       | N            | N          | N            | P               | N               | P               |
| S430     | Male (MSM)  | m50n728-s515 | No               | N       | N       | N            | N          | N            | N               | N               | P               |
| S431     | Male (MSM)  | m50n728-s516 | Yes              | P       | N       | N            | N          | N            | N               | N               | N               |
| S432     | Male (MSM)  | m50n728-s517 | Yes              | N       | P       | N            | N          | N            | N               | N               | N               |
| S433     | Male (MSM)  | m50n728-s518 | Yes              | N       | N       | N            | N          | N            | N               | N               | P               |
| S434     | Male (MSM)  | m50n728-s520 | Yes              | N       | P       | N            | N          | N            | N               | N               | N               |
