# Supplementary material
Source: PubMed Central journal article supplement (PMC8492123)
Supplement: ciaa1123_suppl_supplementary_table_03.pdf [file ciaa1123_suppl_supplementary_table_03.pdf]

### Supplementary Table 3: Samples S01 - S26

| Species                                            | S01   | S02   | S03   | S04  | S05 | S06  | S07  | S08 | S09   | S10   | S11   | S12  | S14   | S15  | S16   | S18   | S19  | S20  | S21   | S23  | S24  | S26  |      |
|----------------------------------------------------|-------|-------|-------|------|-----|------|------|-----|-------|-------|-------|------|-------|------|-------|-------|------|------|-------|------|------|------|------|
| Streptococcus mitis group                          | 0     | 4523  | 0     | 8766 | 737 | 3759 | 4939 | 208 | 8429  | 0     | 13725 | 0    | 1530  | 3665 | 37    | 9956  | 6105 | 0    | 11593 | 27   | 1692 | 3224 |      |
| Lactobacillus iners                                | 41942 | 0     | 0     | 25   | 0   | 253  | 0    | 0   | 12942 | 26980 | 0     | 0    | 0     | 0    | 76    | 39    | 0    | 0    | 0     | 0    | 0    | 4851 |      |
| Gardnerella vaginalis                              | 0     | 4318  | 15933 | 0    | 47  | 7322 | 0    | 0   | 5678  | 3319  | 0     | 0    | 13769 | 0    | 0     | 16166 | 2946 | 1903 | 0     | 0    | 0    | 5167 | 42   |
| Corynebacterium pseudogenitalium/tuberculostrictum | 0     | 2079  | 0     | 58   | 669 | 28   | 430  | 0   | 992   | 95    | 56    | 1606 | 1416  | 609  | 15312 | 58    | 0    | 0    | 0     | 0    | 3356 | 592  | 63   |
| Streptococcus agalactiae                           | 60    | 0     | 0     | 0    | 0   | 44   | 0    | 0   | 0     | 0     | 0     | 0    | 850   | 416  | 0     | 0     | 0    | 0    | 0     | 0    | 0    | 236  | 0    |
| Veillonella montpellierensis                       | 114   | 0     | 0     | 0    | 0   | 5347 | 0    | 0   | 2880  | 4948  | 0     | 0    | 0     | 0    | 0     | 9778  | 2022 | 4994 | 0     | 0    | 0    | 0    | 0    |
| Streptococcus anginosus                            | 95    | 0     | 1280  | 0    | 0   | 0    | 348  | 0   | 0     | 256   | 0     | 0    | 190   | 0    | 0     | 0     | 0    | 0    | 0     | 0    | 0    | 44   | 2694 |
| Chlamydia trachomatis                              | 0     | 0     | 0     | 0    | 63  | 0    | 0    | 0   | 0     | 0     | 0     | 0    | 0     | 0    | 12735 | 0     | 0    | 0    | 0     | 0    | 0    | 0    | 0    |
| Haemophilus parainfluenzae                         | 0     | 0     | 0     | 0    | 0   | 0    | 0    | 0   | 0     | 0     | 0     | 0    | 0     | 0    | 0     | 0     | 0    | 0    | 0     | 0    | 0    | 601  | 1251 |
| Finegoldia magna                                   | 0     | 1452  | 0     | 0    | 0   | 0    | 0    | 0   | 0     | 2529  | 0     | 0    | 29    | 199  | 113   | 643   | 2021 | 0    | 0     | 105  | 565  | 1638 |      |
| Peptoniphilus asaccharolyticus/grossensis/harei    | 0     | 2414  | 523   | 0    | 0   | 0    | 0    | 0   | 0     | 849   | 0     | 0    | 0     | 156  | 0     | 1006  | 0    | 49   | 0     | 0    | 0    | 565  | 949  |
| Sneathia amnii                                     | 0     | 758   | 0     | 0    | 0   | 618  | 0    | 0   | 0     | 2308  | 0     | 0    | 0     | 0    | 0     | 11402 | 4880 | 5792 | 0     | 0    | 0    | 0    | 0    |
| Staphylococcus caprae/cohnii/epidermidis           | 36    | 80    | 0     | 73   | 0   | 0    | 322  | 0   | 1169  | 0     | 0     | 91   | 45    | 2644 | 1137  | 0     | 0    | 0    | 37    | 530  | 0    | 156  |      |
| Gemella haemolysans/taiwanensis                    | 0     | 0     | 0     | 0    | 0   | 40   | 0    | 327 | 942   | 0     | 0     | 0    | 0     | 626  | 0     | 0     | 0    | 0    | 0     | 0    | 1043 | 233  |      |
| Sneathia sanguinogens                              | 0     | 9798  | 0     | 0    | 0   | 4444 | 0    | 0   | 0     | 1253  | 0     | 0    | 0     | 0    | 0     | 261   | 0    | 2501 | 0     | 0    | 0    | 0    | 0    |
| Mycoplasma genitalium                              | 0     | 0     | 0     | 0    | 0   | 0    | 0    | 0   | 0     | 0     | 0     | 8618 | 0     | 0    | 0     | 0     | 0    | 0    | 0     | 0    | 0    | 0    | 0    |
| Mycoplasma penetrans                               | 0     | 0     | 0     | 0    | 0   | 0    | 0    | 0   | 0     | 0     | 0     | 0    | 0     | 0    | 0     | 0     | 0    | 0    | 0     | 0    | 0    | 0    | 0    |
| Haemophilus haemolyticus/quentini                  | 0     | 0     | 0     | 0    | 0   | 0    | 446  | 0   | 0     | 0     | 0     | 0    | 0     | 0    | 0     | 0     | 0    | 0    | 0     | 0    | 488  | 0    |      |
| Corynebacterium pyruviciproducens                  | 0     | 1101  | 0     | 0    | 0   | 39   | 0    | 0   | 0     | 0     | 0     | 0    | 212   | 595  | 0     | 601   | 0    | 0    | 0     | 0    | 0    | 0    | 0    |
| Anaerococcus prevotii/tetradicus                   | 0     | 1671  | 4157  | 0    | 163 | 241  | 0    | 0   | 0     | 2743  | 0     | 0    | 0     | 0    | 0     | 0     | 538  | 0    | 0     | 0    | 0    | 0    | 328  |
| Haemophilus influenzae                             | 0     | 0     | 0     | 0    | 0   | 0    | 0    | 0   | 0     | 0     | 0     | 0    | 0     | 0    | 0     | 0     | 0    | 0    | 0     | 1887 | 1473 | 27   |      |
| Staphylococcus epidermidis/hominis                 | 0     | 836   | 0     | 28   | 0   | 204  | 0    | 508 | 0     | 28    | 101   | 0    | 277   | 859  | 0     | 0     | 0    | 0    | 0     | 745  | 0    | 0    |      |
| Atopobium vaginae                                  | 0     | 0     | 0     | 0    | 64  | 174  | 0    | 0   | 974   | 0     | 0     | 0    | 0     | 0    | 497   | 0     | 312  | 0    | 0     | 0    | 42   | 0    |      |
| Ureaplasma parvum/urealyticum                      | 0     | 0     | 0     | 0    | 0   | 131  | 0    | 121 | 0     | 193   | 120   | 0    | 0     | 0    | 0     | 64    | 891  | 165  | 0     | 0    | 99   | 0    |      |
| Prevotella timonensis                              | 0     | 368   | 6105  | 0    | 0   | 0    | 0    | 0   | 0     | 30    | 0     | 0    | 0     | 0    | 0     | 374   | 0    | 0    | 0     | 0    | 0    | 54   |      |
| Fenollaria massiliensis/timonensis                 | 0     | 523   | 1807  | 0    | 0   | 0    | 0    | 0   | 0     | 0     | 0     | 0    | 0     | 0    | 0     | 3064  | 0    | 0    | 0     | 0    | 0    | 0    |      |
| Anaerococcus                                       | 0     | 5596  | 0     | 0    | 0   | 58   | 0    | 0   | 0     | 0     | 0     | 0    | 0     | 152  | 515   | 0     | 0    | 0    | 0     | 0    | 0    | 40   |      |
| Corynebacterium coyleae                            | 0     | 5499  | 0     | 0    | 309 | 0    | 981  | 0   | 0     | 99    | 0     | 0    | 0     | 287  | 383   | 0     | 0    | 0    | 0     | 196  | 0    | 0    |      |
| Prevotella bivia                                   | 25    | 0     | 7229  | 0    | 0   | 0    | 0    | 0   | 0     | 0     | 0     | 0    | 0     | 0    | 0     | 0     | 0    | 0    | 0     | 0    | 0    | 740  |      |
| Prevotella melaninogenica                          | 0     | 0     | 0     | 0    | 0   | 1371 | 0    | 0   | 0     | 75    | 0     | 0    | 0     | 33   | 0     | 8387  | 0    | 0    | 0     | 0    | 0    | 0    |      |
| Corynebacterium aurimucosum/minutissimum/singulare | 0     | 11150 | 0     | 0    | 0   | 0    | 0    | 109 | 0     | 0     | 0     | 160  | 261   | 88   | 1445  | 0     | 0    | 0    | 0     | 328  | 698  | 0    |      |
| Staphylococcus aureus                              | 0     | 0     | 0     | 0    | 0   | 0    | 0    | 0   | 0     | 0     | 0     | 0    | 0     | 0    | 0     | 0     | 0    | 0    | 0     | 0    | 0    | 0    |      |
| Anaerococcus lactolyticus                          | 0     | 687   | 0     | 0    | 0   | 0    | 0    | 0   | 0     | 110   | 0     | 0    | 0     | 0    | 0     | 66    | 0    | 0    | 0     | 0    | 0    | 29   |      |
| Aerococcus christensenii                           | 0     | 0     | 0     | 0    | 0   | 815  | 0    | 0   | 0     | 466   | 0     | 0    | 0     | 0    | 0     | 991   | 32   | 51   | 0     | 0    | 0    | 68   |      |
| Corynebacterium glucuronolyticum                   | 0     | 0     | 0     | 0    | 0   | 47   | 57   | 0   | 0     | 0     | 0     | 0    | 1823  | 31   | 0     | 0     | 0    | 0    | 0     | 0    | 0    | 0    |      |
| Veillonella atypica                                | 0     | 0     | 0     | 0    | 0   | 0    | 0    | 0   | 0     | 34    | 0     | 0    | 0     | 153  | 0     | 0     | 0    | 0    | 0     | 0    | 0    | 35   |      |
| Veillonella                                        | 0     | 0     | 0     | 0    | 0   | 0    | 283  | 0   | 0     | 0     | 0     | 0    | 0     | 0    | 0     | 0     | 0    | 0    | 0     | 0    | 697  | 0    |      |
| Mycoplasma hominis                                 | 0     | 29    | 0     | 0    | 0   | 505  | 0    | 0   | 75    | 0     | 0     | 0    | 0     | 0    | 150   | 571   | 36   | 0    | 0     | 0    | 0    | 0    |      |
| Granulicatella elegans                             | 0     | 0     | 0     | 0    | 0   | 0    | 0    | 37  | 0     | 0     | 0     | 0    | 0     | 0    | 0     | 0     | 0    | 0    | 0     | 0    | 0    | 0    |      |
| Ezakiella                                          | 0     | 226   | 1422  | 0    | 0   | 0    | 0    | 0   | 0     | 0     | 0     | 0    | 0     | 0    | 83    | 0     | 0    | 0    | 0     | 0    | 0    | 0    |      |
| Shigella/Escherichia                               | 0     | 0     | 0     | 0    | 0   | 0    | 0    | 0   | 0     | 0     | 0     | 0    | 0     | 0    | 0     | 0     | 0    | 0    | 0     | 0    | 0    | 0    |      |
| Streptococcus salivarius                           | 0     | 0     | 0     | 0    | 0   | 0    | 0    | 0   | 0     | 0     | 0     | 0    | 0     | 0    | 0     | 0     | 0    | 0    | 0     | 0    | 0    | 0    |      |
| Actinomyces turicensis                             | 0     | 1146  | 0     | 0    | 0   | 0    | 0    | 0   | 0     | 0     | 0     | 0    | 0     | 0    | 0     | 0     | 0    | 0    | 0     | 0    | 73   | 40   |      |
| Prevotella corporis                                | 0     | 0     | 0     | 0    | 0   | 0    | 0    | 0   | 0     | 0     | 0     | 0    | 0     | 0    | 40    | 0     | 0    | 0    | 0     | 0    | 0    | 0    |      |
| Corynebacterium simulans                           | 0     | 0     | 0     | 0    | 504 | 0    | 134  | 0   | 0     | 0     | 0     | 0    | 0     | 0    | 0     | 0     | 0    | 0    | 0     | 0    | 0    | 0    |      |
| Fusobacterium equinum                              | 0     | 0     | 2718  | 0    | 0   | 0    | 0    | 0   | 0     | 0     | 0     | 0    | 0     | 0    | 0     | 0     | 0    | 0    | 0     | 0    | 134  | 0    |      |
| Corynebacterium                                    | 0     | 3112  | 39    | 0    | 0   | 0    | 0    | 0   | 0     | 0     | 0     | 103  | 0     | 51   | 0     | 0     | 0    | 0    | 0     | 56   | 0    | 0    |      |
| Staphylococcus haemolyticus                        | 0     | 51    | 0     | 0    | 0   | 0    | 0    | 0   | 0     | 93    | 0     | 0    | 0     | 0    | 0     | 0     | 0    | 0    | 0     | 0    | 0    | 0    |      |
| Gemella asaccharolytica                            | 0     | 145   | 0     | 0    | 0   | 510  | 0    | 0   | 0     | 675   | 0     | 0    | 0     | 0    | 0     | 1740  | 1505 | 199  | 0     | 0    | 0    | 0    |      |
| Peptoniphilus                                      | 0     | 1124  | 374   | 0    | 0   | 0    | 0    | 0   | 0     | 0     | 0     | 0    | 0     | 0    | 0     | 910   | 0    | 0    | 0     | 0    | 0    | 0    |      |
| Corynebacterium hadale/imitans                     | 0     | 10130 | 0     | 0    | 64  | 0    | 0    | 0   | 0     | 0     | 0     | 77   | 0     | 0    | 7316  | 0     | 0    | 0    | 0     | 69   | 220  | 0    |      |
| Eggerthella sp. type 1 (species)                   | 0     | 0     | 0     | 0    | 0   | 169  | 0    | 0   | 0     | 1073  | 0     | 0    | 0     | 0    | 0     | 381   | 0    | 276  | 0     | 0    | 0    | 0    |      |
| Prevotella disiens                                 | 0     | 0     | 1050  | 0    | 0   | 0    | 0    | 0   | 0     | 0     | 0     | 0    | 0     | 0    | 0     | 0     | 0    | 0    | 0     | 0    | 0    | 0    |      |
| Peptoniphilus lacrimalis                           | 0     | 236   | 1226  | 0    | 0   | 0    | 0    | 0   | 0     | 0     | 0     | 0    | 0     | 0    | 1132  | 0     | 0    | 0    | 0     | 0    | 0    | 0    |      |
| Anaerococcus vaginalis                             | 0     | 101   | 0     | 0    | 0   | 0    | 0    | 0   | 0     | 217   | 0     | 0    | 0     | 0    | 0     | 100   | 0    | 0    | 0     | 0    | 50   | 47   |      |
| Facklamia hominis                                  | 0     | 0     | 0     | 0    | 0   | 0    | 0    | 0   | 0     | 0     | 0     | 0    | 0     | 0    | 0     | 0     | 0    | 0    | 0     | 0    | 0    | 0    |      |
| Prevotella amnii                                   | 0     | 318   | 0     | 0    | 0   | 1768 | 0    | 0   | 0     | 1716  | 0     | 0    | 0     | 0    | 0     | 13903 | 3921 | 0    | 0     | 0    | 0    | 0    |      |
| Campylobacter ureolyticus                          | 0     | 34    | 0     | 0    | 0   | 0    | 0    | 0   | 0     | 0     | 0     | 0    | 0     | 0    | 25    | 0     | 0    | 0    | 0     | 0    | 0    | 0    |      |
| BVAB2 (species)                                    | 0     | 382   | 0     | 0    | 0   | 0    | 0    | 0   | 0     | 122   | 0     | 0    | 0     | 0    | 0     | 0     | 328  | 0    | 0     | 0    | 0    | 0    |      |
| Haemophilus                                        | 0     | 0     | 0     | 0    | 0   | 0    | 0    | 0   | 0     | 51    | 0     | 0    | 0     | 0    | 0     | 0     | 0    | 0    | 0     | 0    | 324  | 0    |      |
| Anaerococcus hydrogenalis/rubeifantis              | 0     | 192   | 0     | 0    | 0   | 0    | 0    | 0   | 0     | 188   | 0     | 0    | 0     | 98   | 0     | 196   | 0    | 0    | 0     | 0    | 0    | 77   |      |
| Anaerococcus mediterraneensis                      | 0     | 2015  | 0     | 0    | 0   | 0    | 0    | 0   | 0     | 108   | 0     | 0    | 0     | 0    | 0     | 178   | 0    | 0    | 0     | 0    | 69   | 35   |      |
| Dialister sp. type 2                               | 0     | 0     | 0     | 0    | 0   | 0    | 0    | 0   | 0     | 0     | 0     | 0    | 0     | 0    | 25    | 0     | 0    | 0    | 0     | 0    | 0    | 0    |      |
| Dialister microaerophilus                          | 0     | 0     | 0     | 0    | 0   | 81   | 0    | 0   | 0     | 117   | 0     | 0    | 0     | 0    | 0     | 106   | 0    | 62   | 0     | 0    | 0    | 107  |      |
| Corynebacterium amycolatum                         | 0     | 40    | 0     | 0    | 0   | 0    | 0    | 0   | 0     | 0     | 0     | 0    | 0     | 0    | 0     | 0     | 0    | 0    | 0     | 0    | 0    | 0    |      |
| Ureaplasma                                         | 28    | 229   | 0     | 0    | 0   | 0    | 0    | 0   | 0     | 141   | 0     | 0    | 0     | 0    | 0     | 0     | 0    | 0    | 0     | 0    | 0    | 0    |      |
| Enterococcus faecalis                              | 0     | 0     | 0     | 0    | 0   | 0    | 0    | 0   | 0     | 0     | 0     | 0    | 0     | 0    | 0     | 0     | 0    | 0    | 0     | 0    | 0    | 0    |      |
| Parvimonas                                         | 0     | 0     | 0     | 0    | 0   | 0    | 0    | 0   | 0     | 0     | 0     | 0    | 0     | 0    | 0     | 0     | 0    | 0    | 0     | 0    | 0    | 0    |      |
| Haemophilus pittmaniae                             | 0     | 0     | 0     | 0    | 0   | 0    | 0    | 0   | 0     | 0     | 0     | 0    | 0     | 0    | 0     | 0     | 0    | 0    | 0     | 0    | 0    | 354  |      |
| Actinomyces neuii                                  | 0     | 0     | 0     | 0    | 0   | 0    | 0    | 0   | 0     | 0     | 0     | 0    | 59    | 567  | 0     | 0     | 0    | 0    | 0     | 0    | 0    | 0    |      |

# Samples S01 - S26

| Species                                                | S01 | S02   | S03  | S04 | S05 | S06 | S07  | S08 | S09 | S10  | S11 | S12 | S14 | S15 | S16 | S18 | S19   | S20 | S21 | S23 | S24 | S26 |
|--------------------------------------------------------|-----|-------|------|-----|-----|-----|------|-----|-----|------|-----|-----|-----|-----|-----|-----|-------|-----|-----|-----|-----|-----|
| Peptoniphilus rhintidis                                | 0   | 593   | 0    | 0   | 0   | 0   | 0    | 0   | 0   | 0    | 0   | 0   | 0   | 0   | 47  | 173 | 0     | 0   | 0   | 0   | 0   | 72  |
| Anaerococcus senegalensis                              | 0   | 0     | 0    | 0   | 0   | 0   | 0    | 0   | 0   | 0    | 0   | 0   | 0   | 0   | 0   | 0   | 0     | 0   | 0   | 48  | 0   | 0   |
| Peptostreptococcus anaerobius                          | 0   | 0     | 760  | 0   | 0   | 0   | 0    | 0   | 0   | 0    | 0   | 0   | 0   | 0   | 0   | 0   | 0     | 0   | 0   | 0   | 132 | 160 |
| Dialister propionificiens                              | 0   | 93    | 2156 | 0   | 0   | 0   | 0    | 0   | 0   | 0    | 0   | 0   | 0   | 0   | 0   | 129 | 0     | 0   | 0   | 0   | 0   | 0   |
| Peptoniphilus harei                                    | 0   | 362   | 0    | 0   | 0   | 0   | 0    | 0   | 0   | 0    | 0   | 0   | 0   | 0   | 0   | 0   | 0     | 0   | 0   | 0   | 0   | 0   |
| Negativicoccus succinivorans                           | 0   | 165   | 0    | 0   | 0   | 0   | 0    | 0   | 0   | 0    | 0   | 0   | 0   | 0   | 0   | 191 | 0     | 0   | 0   | 0   | 0   | 0   |
| Parvimonas micra                                       | 0   | 0     | 0    | 0   | 0   | 286 | 0    | 0   | 0   | 213  | 0   | 0   | 0   | 0   | 0   | 0   | 0     | 211 | 0   | 0   | 0   | 0   |
| Actinomyces ihumii                                     | 0   | 45    | 0    | 0   | 0   | 0   | 0    | 0   | 0   | 0    | 0   | 0   | 0   | 0   | 0   | 100 | 0     | 0   | 0   | 0   | 0   | 0   |
| Actinotignum timonense                                 | 0   | 0     | 0    | 0   | 0   | 0   | 0    | 0   | 0   | 0    | 0   | 0   | 0   | 0   | 0   | 0   | 0     | 0   | 0   | 0   | 0   | 0   |
| Fenollaria                                             | 0   | 876   | 614  | 0   | 0   | 0   | 0    | 0   | 0   | 0    | 0   | 0   | 0   | 0   | 0   | 84  | 0     | 0   | 0   | 0   | 0   | 0   |
| Fusobacterium massiliense                              | 0   | 0     | 0    | 0   | 0   | 0   | 0    | 0   | 0   | 0    | 0   | 0   | 0   | 0   | 0   | 0   | 0     | 0   | 0   | 0   | 0   | 0   |
| Actinobaculum massiliense                              | 0   | 0     | 0    | 0   | 0   | 0   | 0    | 0   | 0   | 0    | 0   | 0   | 0   | 0   | 0   | 0   | 0     | 0   | 0   | 0   | 0   | 0   |
| Peptoniphilus coxii                                    | 0   | 259   | 0    | 0   | 0   | 0   | 0    | 0   | 0   | 130  | 0   | 0   | 0   | 0   | 0   | 591 | 0     | 0   | 0   | 0   | 0   | 0   |
| Staphylococcus lugdunensis                             | 0   | 0     | 0    | 0   | 0   | 0   | 0    | 0   | 0   | 0    | 0   | 0   | 105 | 0   | 0   | 0   | 0     | 0   | 0   | 0   | 0   | 0   |
| Dermabacter                                            | 0   | 443   | 0    | 0   | 0   | 0   | 0    | 0   | 0   | 0    | 58  | 66  | 0   | 0   | 272 | 0   | 0     | 0   | 0   | 88  | 81  | 0   |
| Alloscardovia omnicolens                               | 0   | 0     | 0    | 0   | 0   | 0   | 0    | 0   | 0   | 0    | 0   | 0   | 0   | 0   | 0   | 0   | 0     | 0   | 0   | 0   | 0   | 0   |
| Varibaculum cambriense                                 | 0   | 368   | 115  | 0   | 0   | 0   | 0    | 0   | 0   | 70   | 0   | 0   | 0   | 0   | 0   | 335 | 0     | 0   | 0   | 0   | 30  | 0   |
| Streptococcus urinialis                                | 0   | 0     | 0    | 0   | 0   | 0   | 0    | 0   | 0   | 0    | 0   | 0   | 0   | 0   | 0   | 0   | 0     | 0   | 0   | 0   | 0   | 0   |
| Corynebacterium appendicis                             | 0   | 12657 | 0    | 0   | 0   | 0   | 0    | 0   | 0   | 0    | 0   | 0   | 0   | 49  | 60  | 0   | 0     | 0   | 0   | 0   | 0   | 0   |
| Actinotignum schaalii                                  | 0   | 0     | 0    | 0   | 0   | 0   | 0    | 0   | 0   | 0    | 0   | 0   | 0   | 0   | 0   | 0   | 0     | 0   | 0   | 0   | 0   | 0   |
| Corynebacterium timonense                              | 0   | 0     | 0    | 0   | 0   | 0   | 0    | 0   | 0   | 0    | 0   | 0   | 0   | 0   | 0   | 0   | 0     | 0   | 0   | 0   | 0   | 0   |
| Gemella                                                | 0   | 0     | 0    | 0   | 0   | 0   | 0    | 0   | 0   | 0    | 0   | 0   | 0   | 0   | 0   | 0   | 0     | 0   | 0   | 0   | 398 | 0   |
| Klebsiella aerogenes/Enterobacter asburiae             | 0   | 0     | 0    | 0   | 0   | 0   | 0    | 0   | 0   | 0    | 0   | 0   | 0   | 0   | 0   | 0   | 0     | 0   | 0   | 0   | 0   | 0   |
| Fusobacterium periodonticum                            | 0   | 0     | 0    | 0   | 0   | 0   | 0    | 0   | 0   | 0    | 0   | 0   | 0   | 0   | 0   | 0   | 0     | 0   | 0   | 0   | 0   | 0   |
| Veillonella dispar                                     | 0   | 0     | 0    | 0   | 0   | 0   | 0    | 0   | 0   | 0    | 0   | 0   | 0   | 0   | 0   | 0   | 0     | 0   | 0   | 0   | 0   | 0   |
| Prevotella colorans                                    | 0   | 127   | 0    | 0   | 0   | 0   | 0    | 0   | 0   | 0    | 0   | 0   | 0   | 0   | 0   | 317 | 0     | 0   | 0   | 0   | 0   | 0   |
| Candidatus Peptoniphilus massiliensis                  | 0   | 467   | 58   | 0   | 0   | 0   | 0    | 0   | 0   | 0    | 0   | 0   | 0   | 0   | 0   | 163 | 0     | 0   | 0   | 0   | 0   | 0   |
| Eremococcus                                            | 0   | 2746  | 0    | 0   | 0   | 0   | 0    | 0   | 0   | 0    | 0   | 26  | 0   | 0   | 330 | 0   | 0     | 0   | 0   | 0   | 0   | 0   |
| Varibaculum anthropi                                   | 0   | 0     | 0    | 0   | 0   | 0   | 0    | 0   | 0   | 0    | 0   | 0   | 0   | 0   | 0   | 117 | 0     | 0   | 0   | 0   | 0   | 0   |
| Propionimicrobium lymphophilum                         | 0   | 0     | 0    | 0   | 0   | 0   | 0    | 0   | 0   | 0    | 0   | 0   | 0   | 0   | 0   | 0   | 0     | 0   | 0   | 0   | 0   | 0   |
| Streptococcus dysgalactiae                             | 0   | 0     | 0    | 0   | 0   | 0   | 0    | 0   | 0   | 0    | 0   | 0   | 0   | 0   | 0   | 0   | 0     | 0   | 0   | 0   | 0   | 0   |
| Negativicoccus                                         | 0   | 156   | 0    | 0   | 0   | 0   | 0    | 0   | 0   | 0    | 0   | 0   | 0   | 0   | 0   | 0   | 0     | 0   | 0   | 0   | 0   | 0   |
| Porphyromonas somerae                                  | 0   | 0     | 0    | 0   | 0   | 0   | 0    | 0   | 0   | 0    | 0   | 0   | 0   | 0   | 0   | 0   | 0     | 0   | 0   | 0   | 0   | 0   |
| Corynebacterium jeikeium                               | 0   | 12811 | 0    | 0   | 32  | 0   | 0    | 0   | 0   | 0    | 0   | 0   | 0   | 0   | 0   | 0   | 0     | 0   | 0   | 0   | 95  | 0   |
| Mobiluncus curtisii                                    | 0   | 316   | 481  | 0   | 0   | 0   | 0    | 0   | 0   | 48   | 0   | 0   | 0   | 0   | 0   | 0   | 0     | 0   | 0   | 0   | 0   | 0   |
| Porphyromonas uenonis                                  | 0   | 35    | 393  | 0   | 0   | 0   | 0    | 0   | 0   | 0    | 0   | 0   | 0   | 0   | 0   | 78  | 0     | 0   | 0   | 0   | 0   | 0   |
| Aerococcus urinae                                      | 0   | 0     | 0    | 0   | 0   | 0   | 4706 | 0   | 0   | 0    | 0   | 0   | 0   | 0   | 0   | 0   | 0     | 0   | 0   | 0   | 0   | 0   |
| Corynebacterium mycetoides                             | 0   | 67    | 0    | 0   | 0   | 0   | 0    | 0   | 0   | 0    | 0   | 0   | 0   | 0   | 0   | 0   | 0     | 0   | 0   | 0   | 0   | 0   |
| Cutibacterium acnes                                    | 0   | 0     | 0    | 0   | 0   | 0   | 0    | 0   | 0   | 0    | 0   | 0   | 0   | 0   | 0   | 0   | 0     | 0   | 0   | 0   | 0   | 0   |
| Urinacoccus massiliensis                               | 0   | 398   | 0    | 0   | 0   | 0   | 0    | 0   | 0   | 0    | 0   | 0   | 0   | 0   | 0   | 99  | 0     | 0   | 0   | 0   | 0   | 0   |
| Campylobacter hominis                                  | 0   | 0     | 0    | 0   | 0   | 0   | 0    | 0   | 0   | 0    | 0   | 0   | 0   | 0   | 0   | 0   | 0     | 0   | 0   | 0   | 0   | 0   |
| Staphylococcus capitis/caprae                          | 0   | 0     | 0    | 0   | 0   | 0   | 0    | 0   | 0   | 0    | 0   | 0   | 0   | 0   | 0   | 0   | 0     | 0   | 0   | 0   | 0   | 0   |
| Sneathia                                               | 0   | 0     | 0    | 0   | 0   | 0   | 0    | 0   | 0   | 1925 | 0   | 0   | 0   | 0   | 0   | 151 | 0     | 0   | 0   | 0   | 0   | 0   |
| Prevotella jejuni                                      | 0   | 0     | 0    | 0   | 0   | 0   | 0    | 0   | 0   | 77   | 0   | 0   | 0   | 0   | 0   | 0   | 0     | 0   | 0   | 0   | 0   | 0   |
| Varibaculum                                            | 0   | 165   | 0    | 0   | 0   | 0   | 0    | 0   | 0   | 0    | 0   | 0   | 0   | 0   | 0   | 407 | 0     | 0   | 0   | 0   | 0   | 0   |
| Corynebacterium striatum                               | 0   | 0     | 0    | 0   | 0   | 0   | 0    | 0   | 0   | 0    | 0   | 0   | 0   | 0   | 0   | 0   | 0     | 0   | 0   | 0   | 0   | 0   |
| Jonquetella anthropi                                   | 0   | 0     | 0    | 0   | 0   | 0   | 0    | 0   | 0   | 0    | 0   | 0   | 0   | 0   | 0   | 0   | 0     | 0   | 0   | 0   | 0   | 0   |
| Peptoniphilus koeoeneniae                              | 0   | 142   | 0    | 0   | 0   | 0   | 0    | 0   | 0   | 0    | 0   | 0   | 0   | 0   | 0   | 31  | 0     | 0   | 0   | 0   | 0   | 0   |
| Bifidobacterium longum                                 | 0   | 0     | 0    | 0   | 0   | 0   | 0    | 0   | 0   | 0    | 0   | 0   | 0   | 0   | 0   | 0   | 0     | 0   | 0   | 0   | 0   | 0   |
| Helicobacter                                           | 0   | 0     | 0    | 0   | 0   | 0   | 0    | 0   | 0   | 0    | 0   | 0   | 0   | 0   | 0   | 0   | 0     | 0   | 0   | 0   | 0   | 0   |
| Lawsonella clevelandensis                              | 0   | 0     | 0    | 0   | 0   | 0   | 0    | 0   | 0   | 0    | 0   | 0   | 0   | 0   | 36  | 0   | 0     | 0   | 0   | 0   | 0   | 0   |
| Escherichia coli/fergusonii                            | 0   | 0     | 0    | 0   | 0   | 0   | 0    | 0   | 0   | 0    | 0   | 0   | 0   | 0   | 0   | 0   | 0     | 0   | 0   | 0   | 0   | 0   |
| Fusobacterium nucleatum                                | 0   | 0     | 0    | 0   | 0   | 0   | 0    | 0   | 0   | 0    | 0   | 0   | 0   | 0   | 0   | 33  | 0     | 0   | 0   | 0   | 0   | 0   |
| Porphyromonas asaccharolytica                          | 0   | 0     | 0    | 0   | 0   | 0   | 0    | 0   | 0   | 0    | 0   | 0   | 0   | 0   | 0   | 0   | 0     | 0   | 0   | 0   | 0   | 0   |
| Anaerococcus octavius                                  | 0   | 1979  | 0    | 0   | 0   | 0   | 0    | 0   | 0   | 0    | 0   | 0   | 0   | 101 | 238 | 0   | 0     | 0   | 0   | 78  | 0   | 0   |
| Fusobacterium                                          | 0   | 0     | 0    | 0   | 0   | 0   | 0    | 0   | 0   | 0    | 0   | 0   | 0   | 0   | 0   | 0   | 0     | 0   | 0   | 0   | 0   | 0   |
| Corynebacterium phoceense                              | 0   | 0     | 0    | 0   | 0   | 0   | 0    | 0   | 0   | 0    | 247 | 0   | 0   | 0   | 0   | 0   | 0     | 0   | 0   | 0   | 0   | 0   |
| Ruminococcus                                           | 0   | 56    | 0    | 0   | 0   | 0   | 0    | 0   | 0   | 0    | 0   | 0   | 0   | 0   | 0   | 0   | 0     | 0   | 0   | 0   | 0   | 0   |
| Arcanobacterium                                        | 0   | 75    | 0    | 0   | 0   | 0   | 0    | 0   | 0   | 0    | 0   | 0   | 0   | 0   | 0   | 164 | 0     | 0   | 0   | 0   | 0   | 0   |
| Khoudiadiopia                                          | 0   | 79    | 0    | 0   | 0   | 0   | 0    | 0   | 0   | 0    | 0   | 0   | 0   | 0   | 0   | 692 | 0     | 0   | 0   | 0   | 0   | 0   |
| Atopobium deltae                                       | 0   | 0     | 0    | 0   | 0   | 0   | 0    | 0   | 0   | 0    | 0   | 0   | 0   | 0   | 0   | 0   | 0     | 0   | 0   | 0   | 0   | 0   |
| Haemophilus parahaemolyticus                           | 0   | 0     | 0    | 0   | 0   | 0   | 0    | 0   | 0   | 0    | 0   | 0   | 0   | 0   | 0   | 0   | 0     | 0   | 0   | 0   | 0   | 0   |
| Howardella                                             | 0   | 0     | 0    | 0   | 0   | 0   | 0    | 0   | 0   | 79   | 0   | 0   | 0   | 0   | 0   | 0   | 0     | 0   | 0   | 0   | 0   | 176 |
| Prevotella buccalis                                    | 0   | 36    | 0    | 0   | 0   | 0   | 0    | 0   | 0   | 0    | 0   | 0   | 0   | 0   | 0   | 133 | 0     | 0   | 0   | 0   | 0   | 0   |
| Corynebacterium auris                                  | 0   | 0     | 0    | 0   | 0   | 0   | 0    | 0   | 0   | 0    | 0   | 0   | 0   | 0   | 0   | 0   | 0     | 0   | 0   | 0   | 0   | 0   |
| Candidatus Mycoplasma gireddii                         | 0   | 0     | 0    | 0   | 0   | 0   | 0    | 0   | 0   | 0    | 0   | 0   | 0   | 0   | 0   | 0   | 10231 | 0   | 0   | 0   | 0   | 0   |
| Alloicoccus                                            | 0   | 0     | 0    | 0   | 0   | 0   | 0    | 0   | 0   | 0    | 0   | 0   | 0   | 0   | 0   | 0   | 0     | 0   | 0   | 0   | 0   | 0   |
| Corynebacterium founierii/mucifaciens/ureicelerivorans | 0   | 1525  | 0    | 0   | 0   | 0   | 0    | 0   | 0   | 0    | 28  | 0   | 0   | 0   | 130 | 0   | 0     | 0   | 0   | 207 | 0   | 0   |
| Corynebacterium auris/timonense                        | 0   | 0     | 0    | 0   | 0   | 0   | 0    | 0   | 0   | 0    | 0   | 0   | 0   | 0   | 0   | 0   | 0     | 0   | 0   | 0   | 0   | 0   |
| Veillonella ratti/seminalis                            | 0   | 0     | 0    | 0   | 0   | 0   | 0    | 0   | 0   | 0    | 0   | 0   | 0   | 0   | 0   | 0   | 0     | 0   | 0   | 0   | 0   | 0   |

# Samples S01 - S26

| Species                                    | S01 | S02  | S03 | S04 | S05 | S06 | S07 | S08 | S09 | S10 | S11 | S12 | S14 | S15 | S16 | S18 | S19 | S20 | S21 | S23 | S24 | S26  |
|--------------------------------------------|-----|------|-----|-----|-----|-----|-----|-----|-----|-----|-----|-----|-----|-----|-----|-----|-----|-----|-----|-----|-----|------|
| Lactobacillus gasseri                      | 0   | 0    | 0   | 0   | 0   | 0   | 0   | 0   | 0   | 0   | 0   | 0   | 0   | 0   | 0   | 0   | 0   | 0   | 0   | 0   | 0   | 0    |
| Tissierella                                | 0   | 96   | 0   | 0   | 0   | 0   | 0   | 0   | 0   | 0   | 0   | 0   | 0   | 0   | 0   | 0   | 0   | 0   | 0   | 0   | 0   | 0    |
| Granulicatella adiacens                    | 0   | 0    | 0   | 0   | 0   | 0   | 0   | 0   | 0   | 0   | 0   | 0   | 0   | 0   | 0   | 0   | 0   | 0   | 0   | 0   | 0   | 0    |
| Sutterella                                 | 0   | 0    | 0   | 0   | 0   | 0   | 0   | 0   | 0   | 0   | 0   | 0   | 0   | 0   | 0   | 0   | 0   | 0   | 0   | 0   | 0   | 0    |
| Prevotella nanceiensis                     | 0   | 0    | 0   | 0   | 0   | 0   | 0   | 0   | 0   | 0   | 0   | 0   | 0   | 0   | 0   | 0   | 0   | 0   | 0   | 0   | 0   | 188  |
| Lactobacillus jensenii                     | 0   | 0    | 0   | 0   | 0   | 0   | 0   | 0   | 0   | 0   | 0   | 0   | 0   | 0   | 0   | 0   | 0   | 0   | 0   | 0   | 0   | 0    |
| Lactobacillus crispatus                    | 0   | 0    | 0   | 0   | 0   | 0   | 0   | 0   | 0   | 0   | 0   | 0   | 0   | 0   | 0   | 0   | 0   | 0   | 0   | 44  | 0   | 0    |
| Candidate Division TM7 vaginal (genus)     | 0   | 26   | 0   | 0   | 0   | 0   | 0   | 0   | 0   | 0   | 0   | 0   | 0   | 0   | 0   | 0   | 0   | 0   | 0   | 0   | 0   | 0    |
| Candidatus Saccharimonas                   | 0   | 0    | 0   | 0   | 0   | 0   | 0   | 0   | 0   | 0   | 0   | 0   | 0   | 0   | 0   | 0   | 0   | 0   | 0   | 0   | 0   | 0    |
| Peptococcus niger                          | 0   | 0    | 0   | 0   | 0   | 0   | 0   | 0   | 0   | 0   | 0   | 0   | 0   | 0   | 0   | 0   | 0   | 0   | 0   | 0   | 0   | 0    |
| Neisseria flavescens/perflava              | 0   | 0    | 0   | 0   | 0   | 0   | 0   | 0   | 0   | 0   | 0   | 0   | 0   | 0   | 0   | 0   | 0   | 0   | 0   | 0   | 0   | 0    |
| Gemella sanguinis                          | 0   | 0    | 0   | 0   | 0   | 0   | 0   | 0   | 0   | 0   | 0   | 0   | 0   | 0   | 0   | 0   | 0   | 0   | 0   | 0   | 0   | 0    |
| Porphyromonas                              | 0   | 0    | 0   | 0   | 0   | 0   | 0   | 0   | 0   | 0   | 0   | 0   | 0   | 0   | 0   | 0   | 0   | 0   | 0   | 0   | 0   | 1024 |
| Prevotella                                 | 0   | 0    | 0   | 0   | 0   | 0   | 0   | 0   | 0   | 99  | 0   | 0   | 0   | 0   | 0   | 0   | 0   | 0   | 0   | 0   | 0   | 0    |
| Corynebacterium thomssenii                 | 0   | 50   | 0   | 0   | 0   | 0   | 0   | 0   | 0   | 0   | 0   | 0   | 0   | 0   | 57  | 0   | 0   | 0   | 0   | 0   | 117 | 0    |
| Lachnospiraceae                            | 0   | 0    | 0   | 0   | 0   | 0   | 0   | 0   | 0   | 0   | 0   | 0   | 0   | 0   | 0   | 0   | 0   | 0   | 0   | 0   | 0   | 0    |
| Corynebacterium tuberculostearicum         | 0   | 0    | 0   | 0   | 0   | 0   | 0   | 0   | 0   | 0   | 0   | 0   | 0   | 0   | 0   | 0   | 0   | 0   | 0   | 0   | 0   | 0    |
| Dermabacter hominis                        | 0   | 0    | 0   | 0   | 0   | 0   | 0   | 0   | 0   | 0   | 0   | 0   | 0   | 0   | 0   | 0   | 0   | 0   | 0   | 0   | 0   | 0    |
| Veillonella rogosae                        | 0   | 0    | 0   | 0   | 0   | 0   | 0   | 0   | 0   | 0   | 0   | 0   | 0   | 0   | 0   | 0   | 0   | 0   | 0   | 0   | 0   | 30   |
| Actinomyces hongkongensis                  | 0   | 153  | 0   | 0   | 0   | 0   | 0   | 0   | 0   | 74  | 0   | 0   | 0   | 0   | 0   | 0   | 0   | 56  | 0   | 0   | 0   | 0    |
| Veillonella parvula/rogosae                | 0   | 0    | 0   | 0   | 0   | 0   | 0   | 0   | 0   | 0   | 0   | 0   | 0   | 0   | 0   | 0   | 0   | 0   | 0   | 0   | 0   | 0    |
| Anaerococcus provencensis                  | 0   | 37   | 0   | 0   | 0   | 0   | 0   | 0   | 0   | 0   | 0   | 0   | 0   | 0   | 0   | 0   | 0   | 0   | 0   | 31  | 0   | 0    |
| Porphyromonas sp. type 1                   | 0   | 0    | 0   | 0   | 0   | 0   | 0   | 0   | 0   | 0   | 0   | 0   | 0   | 0   | 0   | 0   | 0   | 0   | 0   | 0   | 0   | 0    |
| Brevibacterium paucivorans                 | 0   | 170  | 0   | 0   | 0   | 0   | 0   | 0   | 0   | 0   | 0   | 0   | 0   | 0   | 0   | 0   | 0   | 0   | 0   | 0   | 0   | 90   |
| Peptostreptococcus                         | 0   | 0    | 0   | 0   | 0   | 0   | 0   | 0   | 0   | 0   | 0   | 0   | 0   | 0   | 0   | 0   | 0   | 0   | 0   | 0   | 0   | 0    |
| Facklamia languida                         | 0   | 3947 | 0   | 0   | 0   | 0   | 0   | 0   | 0   | 0   | 0   | 0   | 0   | 0   | 0   | 0   | 0   | 0   | 0   | 0   | 0   | 0    |
| Streptobacillus                            | 0   | 0    | 0   | 0   | 0   | 0   | 0   | 0   | 0   | 0   | 0   | 0   | 0   | 0   | 0   | 0   | 0   | 0   | 0   | 0   | 0   | 3299 |
| Gemella haemolysans                        | 0   | 0    | 0   | 0   | 0   | 0   | 0   | 0   | 0   | 0   | 0   | 0   | 0   | 0   | 0   | 0   | 0   | 0   | 0   | 0   | 0   | 0    |
| Haemophilus sputorum                       | 0   | 0    | 0   | 0   | 0   | 0   | 0   | 193 | 0   | 0   | 0   | 0   | 0   | 0   | 0   | 0   | 0   | 0   | 0   | 0   | 0   | 0    |
| Actinotignum urinale                       | 0   | 0    | 0   | 0   | 0   | 0   | 0   | 0   | 0   | 0   | 0   | 0   | 0   | 0   | 0   | 0   | 0   | 0   | 0   | 0   | 0   | 0    |
| Dialister pneumosintes                     | 0   | 0    | 264 | 0   | 0   | 0   | 0   | 0   | 0   | 0   | 0   | 0   | 0   | 0   | 0   | 0   | 0   | 0   | 0   | 0   | 0   | 0    |
| Treponema pallidum                         | 0   | 0    | 0   | 0   | 0   | 0   | 0   | 0   | 0   | 0   | 0   | 0   | 0   | 0   | 0   | 0   | 0   | 0   | 0   | 0   | 0   | 0    |
| Porphyromonas bennonis                     | 0   | 412  | 0   | 0   | 0   | 0   | 0   | 0   | 0   | 0   | 0   | 0   | 0   | 0   | 0   | 45  | 0   | 0   | 0   | 0   | 0   | 0    |
| Bergeyella                                 | 0   | 0    | 0   | 0   | 0   | 0   | 0   | 0   | 0   | 0   | 0   | 0   | 69  | 0   | 0   | 0   | 0   | 0   | 0   | 0   | 0   | 0    |
| Actinotignum schaalii/timonense            | 0   | 0    | 0   | 0   | 0   | 0   | 36  | 0   | 0   | 0   | 0   | 0   | 0   | 0   | 0   | 0   | 0   | 0   | 0   | 0   | 0   | 0    |
| Klebsiella aerogenes/Kluyvera cryocrescens | 0   | 0    | 0   | 0   | 0   | 0   | 0   | 0   | 0   | 0   | 0   | 0   | 0   | 0   | 0   | 0   | 0   | 0   | 0   | 0   | 0   | 0    |
| Rothia mucilaginosa                        | 0   | 0    | 0   | 0   | 0   | 0   | 0   | 0   | 0   | 0   | 0   | 0   | 0   | 0   | 0   | 0   | 0   | 0   | 0   | 0   | 0   | 0    |
| Solobacterium moorei                       | 0   | 0    | 0   | 0   | 0   | 0   | 0   | 0   | 0   | 0   | 0   | 0   | 0   | 0   | 0   | 0   | 0   | 0   | 0   | 0   | 0   | 0    |
| Mageibacillus indolicus                    | 0   | 0    | 0   | 0   | 0   | 0   | 0   | 0   | 0   | 0   | 0   | 0   | 0   | 0   | 0   | 0   | 0   | 160 | 0   | 0   | 0   | 0    |
| Serratia urelytica                         | 0   | 0    | 0   | 0   | 0   | 0   | 0   | 0   | 0   | 0   | 0   | 0   | 0   | 0   | 0   | 0   | 0   | 0   | 0   | 0   | 0   | 0    |
| Peptoniphilus obesi                        | 0   | 116  | 0   | 0   | 0   | 0   | 0   | 0   | 0   | 0   | 0   | 0   | 0   | 0   | 0   | 0   | 0   | 0   | 0   | 0   | 0   | 0    |
| Peptoniphilus harei/phoceensis             | 0   | 0    | 0   | 0   | 0   | 0   | 0   | 0   | 0   | 0   | 0   | 0   | 0   | 0   | 0   | 0   | 0   | 0   | 0   | 0   | 0   | 0    |
| Corynebacterium atypicum                   | 0   | 0    | 0   | 0   | 0   | 0   | 0   | 0   | 0   | 0   | 0   | 0   | 0   | 0   | 0   | 0   | 0   | 0   | 0   | 0   | 0   | 0    |
| Atopobium minutum                          | 0   | 0    | 0   | 0   | 0   | 0   | 0   | 0   | 0   | 0   | 0   | 0   | 0   | 0   | 0   | 0   | 0   | 0   | 0   | 0   | 0   | 0    |
| Corynebacterium genitalium                 | 0   | 0    | 0   | 0   | 0   | 0   | 0   | 0   | 0   | 0   | 0   | 0   | 0   | 77  | 33  | 0   | 0   | 0   | 0   | 0   | 0   | 0    |
| Bifidobacterium tsurumense                 | 0   | 0    | 0   | 0   | 0   | 0   | 0   | 0   | 0   | 0   | 0   | 0   | 0   | 296 | 0   | 0   | 0   | 0   | 0   | 0   | 0   | 0    |
| Micrococcus                                | 0   | 0    | 0   | 0   | 0   | 0   | 0   | 0   | 0   | 0   | 0   | 0   | 0   | 0   | 117 | 0   | 0   | 0   | 0   | 0   | 0   | 0    |
| Megasphaera genomsp. type_1                | 0   | 0    | 0   | 0   | 0   | 0   | 0   | 0   | 0   | 0   | 0   | 0   | 0   | 0   | 0   | 0   | 0   | 0   | 0   | 0   | 0   | 0    |
| Enhydrobacter                              | 0   | 0    | 0   | 0   | 0   | 0   | 0   | 0   | 0   | 0   | 0   | 0   | 0   | 0   | 37  | 0   | 0   | 0   | 0   | 0   | 0   | 0    |
| Fastidiosipila sanguinis                   | 0   | 398  | 0   | 0   | 0   | 0   | 0   | 0   | 0   | 0   | 0   | 0   | 0   | 0   | 0   | 0   | 0   | 0   | 0   | 0   | 0   | 0    |
| Prevotellamassilia                         | 0   | 0    | 0   | 0   | 0   | 0   | 0   | 0   | 0   | 0   | 0   | 0   | 0   | 0   | 0   | 0   | 0   | 0   | 0   | 0   | 0   | 111  |
| Peptostreptococcaceae                      | 0   | 39   | 0   | 0   | 0   | 0   | 0   | 0   | 0   | 0   | 0   | 0   | 0   | 0   | 0   | 0   | 0   | 0   | 0   | 0   | 0   | 0    |
| Morganella morganii                        | 0   | 0    | 0   | 0   | 0   | 0   | 0   | 0   | 0   | 0   | 0   | 0   | 0   | 0   | 0   | 0   | 0   | 0   | 0   | 0   | 0   | 0    |
| Neofamilia                                 | 0   | 1765 | 0   | 0   | 0   | 0   | 0   | 0   | 0   | 0   | 0   | 0   | 0   | 0   | 0   | 0   | 0   | 0   | 0   | 0   | 0   | 0    |
| Pseudoclavibacter bifida                   | 0   | 119  | 0   | 0   | 0   | 0   | 0   | 0   | 0   | 0   | 0   | 0   | 0   | 0   | 0   | 0   | 0   | 0   | 0   | 0   | 0   | 0    |
| Helcococcus                                | 0   | 2032 | 0   | 0   | 0   | 0   | 0   | 0   | 0   | 0   | 0   | 0   | 0   | 0   | 0   | 0   | 0   | 0   | 0   | 0   | 0   | 0    |
| Brevibacterium ravenspurgense              | 0   | 25   | 0   | 0   | 0   | 0   | 0   | 0   | 0   | 0   | 0   | 0   | 0   | 0   | 0   | 0   | 0   | 0   | 0   | 0   | 0   | 0    |
| Moryella indoligenes                       | 0   | 0    | 0   | 0   | 0   | 0   | 0   | 0   | 0   | 0   | 0   | 0   | 0   | 0   | 0   | 0   | 0   | 0   | 0   | 0   | 0   | 0    |
| Olegusella massiliensis                    | 0   | 0    | 0   | 0   | 0   | 0   | 0   | 0   | 0   | 0   | 0   | 0   | 0   | 0   | 0   | 31  | 0   | 0   | 0   | 0   | 0   | 0    |
| Morococcus cerebrosus                      | 0   | 0    | 0   | 0   | 0   | 0   | 378 | 0   | 0   | 0   | 0   | 0   | 0   | 0   | 0   | 0   | 0   | 0   | 0   | 0   | 0   | 0    |
| Prevotella scopos                          | 0   | 0    | 0   | 0   | 0   | 0   | 0   | 0   | 0   | 0   | 0   | 0   | 0   | 0   | 0   | 0   | 0   | 0   | 0   | 0   | 0   | 86   |
| Veillonella parvula/tobetsuensis           | 0   | 0    | 0   | 0   | 0   | 0   | 0   | 0   | 0   | 0   | 0   | 0   | 0   | 0   | 0   | 0   | 0   | 0   | 0   | 0   | 0   | 48   |
| Moryella                                   | 0   | 0    | 0   | 0   | 0   | 0   | 0   | 0   | 0   | 0   | 0   | 0   | 0   | 0   | 0   | 0   | 0   | 0   | 0   | 0   | 0   | 0    |
| Atopobium parvulum                         | 0   | 0    | 0   | 0   | 0   | 0   | 0   | 0   | 0   | 0   | 0   | 0   | 0   | 0   | 0   | 0   | 0   | 0   | 0   | 0   | 0   | 0    |
| Serratia marcescens                        | 0   | 0    | 0   | 0   | 0   | 0   | 0   | 0   | 0   | 0   | 0   | 0   | 0   | 0   | 0   | 0   | 0   | 0   | 0   | 0   | 0   | 0    |
| Collinsella aerofaciens                    | 0   | 0    | 0   | 0   | 0   | 0   | 0   | 0   | 0   | 0   | 0   | 0   | 0   | 0   | 0   | 0   | 0   | 0   | 0   | 0   | 0   | 0    |
| Curvibacter                                | 0   | 0    | 0   | 0   | 0   | 0   | 0   | 0   | 0   | 0   | 0   | 0   | 0   | 0   | 0   | 0   | 0   | 0   | 0   | 0   | 0   | 0    |
| Rothia dentocariosa                        | 0   | 0    | 0   | 0   | 0   | 0   | 0   | 0   | 0   | 0   | 0   | 0   | 0   | 0   | 0   | 0   | 0   | 0   | 0   | 0   | 0   | 0    |
| Prevotella bergensis                       | 0   | 0    | 0   | 0   | 0   | 0   | 0   | 0   | 0   | 0   | 0   | 0   | 0   | 0   | 0   | 0   | 0   | 0   | 0   | 0   | 0   | 0    |
| Corynebacterium sundsvallense              | 0   | 0    | 0   | 0   | 0   | 0   | 0   | 0   | 0   | 0   | 0   | 0   | 0   | 0   | 0   | 0   | 0   | 0   | 0   | 0   | 0   | 0    |

# Samples S01 - S26

| Species                                       | S01 | S02 | S03 | S04 | S05 | S06 | S07 | S08 | S09 | S10 | S11 | S12 | S14 | S15 | S16 | S18 | S19 | S20 | S21 | S23 | S24 | S26 |
|-----------------------------------------------|-----|-----|-----|-----|-----|-----|-----|-----|-----|-----|-----|-----|-----|-----|-----|-----|-----|-----|-----|-----|-----|-----|
| Coriobacteria                                 | 0   | 0   | 0   | 0   | 0   | 0   | 0   | 0   | 0   | 0   | 0   | 0   | 0   | 0   | 0   | 0   | 0   | 0   | 0   | 0   | 0   | 0   |
| Neisseria meningitidis                        | 0   | 0   | 0   | 0   | 0   | 0   | 0   | 0   | 0   | 0   | 0   | 0   | 0   | 0   | 0   | 0   | 0   | 0   | 0   | 0   | 0   | 0   |
| Dermacoccus nishinomiyaensis                  | 0   | 0   | 0   | 0   | 0   | 0   | 0   | 0   | 0   | 0   | 0   | 0   | 0   | 0   | 62  | 0   | 0   | 0   | 0   | 0   | 0   | 0   |
| Leptotrichia                                  | 0   | 0   | 0   | 0   | 0   | 0   | 0   | 0   | 0   | 0   | 0   | 0   | 0   | 0   | 0   | 0   | 0   | 0   | 0   | 0   | 0   | 0   |
| Microbacteriaceae                             | 0   | 0   | 0   | 0   | 0   | 0   | 0   | 0   | 0   | 0   | 0   | 0   | 0   | 0   | 0   | 0   | 0   | 0   | 0   | 0   | 0   | 0   |
| Klebsiella pneumoniae/varicola                | 0   | 0   | 0   | 0   | 0   | 0   | 0   | 0   | 0   | 0   | 0   | 0   | 0   | 0   | 0   | 0   | 0   | 0   | 0   | 0   | 0   | 0   |
| Hafnia alvei                                  | 0   | 0   | 0   | 0   | 0   | 0   | 0   | 0   | 0   | 0   | 0   | 0   | 0   | 0   | 0   | 0   | 0   | 0   | 0   | 0   | 0   | 0   |
| Caulobacter                                   | 0   | 0   | 0   | 0   | 0   | 0   | 0   | 29  | 0   | 0   | 0   | 0   | 0   | 0   | 0   | 0   | 0   | 0   | 37  | 0   | 0   | 0   |
| Lactobacillus reuteri                         | 0   | 0   | 0   | 0   | 0   | 0   | 0   | 0   | 0   | 0   | 0   | 0   | 0   | 0   | 0   | 0   | 0   | 0   | 0   | 0   | 0   | 0   |
| Gemella morbillorum                           | 0   | 0   | 0   | 0   | 0   | 0   | 0   | 0   | 0   | 0   | 0   | 0   | 0   | 0   | 0   | 0   | 0   | 0   | 0   | 0   | 0   | 0   |
| Rothia                                        | 0   | 0   | 0   | 0   | 0   | 0   | 0   | 0   | 0   | 0   | 0   | 0   | 0   | 0   | 0   | 0   | 0   | 0   | 0   | 0   | 0   | 0   |
| Campylobacter                                 | 0   | 0   | 0   | 0   | 0   | 0   | 0   | 0   | 0   | 0   | 0   | 0   | 0   | 0   | 0   | 0   | 0   | 0   | 0   | 0   | 0   | 0   |
| Prevotella genogroup 3                        | 0   | 0   | 0   | 0   | 0   | 0   | 0   | 0   | 0   | 0   | 0   | 0   | 0   | 0   | 0   | 0   | 0   | 0   | 0   | 0   | 0   | 0   |
| Staphylococcus warneri                        | 0   | 0   | 0   | 0   | 0   | 0   | 0   | 0   | 0   | 0   | 0   | 0   | 0   | 0   | 0   | 0   | 0   | 0   | 0   | 0   | 0   | 0   |
| Blautia wexlerae                              | 0   | 0   | 0   | 0   | 0   | 0   | 0   | 0   | 0   | 0   | 0   | 0   | 0   | 0   | 0   | 0   | 0   | 0   | 0   | 0   | 0   | 0   |
| Lachnoanaerobaculum                           | 0   | 0   | 0   | 0   | 0   | 0   | 0   | 0   | 0   | 0   | 0   | 0   | 0   | 0   | 0   | 0   | 0   | 0   | 0   | 0   | 0   | 0   |
| Anaerococcus hydrogenalis/senegalensis        | 0   | 0   | 0   | 0   | 0   | 0   | 0   | 0   | 0   | 0   | 0   | 0   | 0   | 34  | 0   | 0   | 0   | 0   | 0   | 0   | 0   | 0   |
| Brevibacterium mcbrellneri                    | 0   | 0   | 0   | 0   | 0   | 0   | 0   | 0   | 0   | 0   | 0   | 0   | 0   | 0   | 0   | 0   | 0   | 0   | 0   | 0   | 0   | 0   |
| Corynebacterium glaucum                       | 0   | 40  | 0   | 0   | 0   | 0   | 0   | 0   | 0   | 0   | 0   | 0   | 0   | 55  | 90  | 0   | 0   | 0   | 0   | 0   | 0   | 0   |
| Prevotella salivae                            | 0   | 0   | 0   | 0   | 0   | 0   | 0   | 0   | 0   | 33  | 0   | 0   | 0   | 0   | 0   | 0   | 0   | 0   | 0   | 0   | 0   | 0   |
| Coriobacteriaceae                             | 0   | 0   | 0   | 0   | 0   | 0   | 0   | 0   | 0   | 0   | 0   | 0   | 0   | 0   | 0   | 0   | 0   | 0   | 0   | 0   | 0   | 0   |
| Bulleidia                                     | 0   | 0   | 0   | 0   | 0   | 0   | 0   | 0   | 0   | 0   | 0   | 0   | 0   | 0   | 0   | 0   | 0   | 0   | 0   | 0   | 0   | 0   |
| Peptococcus                                   | 0   | 84  | 0   | 0   | 0   | 0   | 0   | 0   | 0   | 0   | 0   | 0   | 0   | 0   | 0   | 0   | 0   | 0   | 0   | 0   | 0   | 0   |
| Serratia marcescens/nematodiphila             | 0   | 0   | 0   | 0   | 0   | 0   | 0   | 0   | 0   | 0   | 0   | 0   | 0   | 0   | 0   | 0   | 0   | 0   | 0   | 0   | 0   | 0   |
| Leptotrichia wadei                            | 0   | 0   | 0   | 0   | 0   | 0   | 0   | 0   | 0   | 0   | 0   | 0   | 0   | 0   | 0   | 0   | 0   | 0   | 0   | 0   | 0   | 0   |
| Neisseriaceae                                 | 0   | 61  | 0   | 0   | 0   | 0   | 0   | 0   | 0   | 0   | 0   | 0   | 0   | 0   | 0   | 0   | 0   | 0   | 0   | 0   | 0   | 0   |
| Aerococcus sanguinicola                       | 0   | 0   | 0   | 0   | 0   | 0   | 0   | 0   | 0   | 0   | 0   | 0   | 0   | 0   | 0   | 0   | 0   | 0   | 0   | 0   | 0   | 0   |
| Criobacterium bergeronii                      | 0   | 0   | 0   | 0   | 0   | 0   | 0   | 0   | 0   | 0   | 0   | 0   | 0   | 0   | 0   | 0   | 0   | 0   | 0   | 0   | 0   | 0   |
| Brevibacterium luteolum                       | 0   | 0   | 0   | 0   | 0   | 0   | 0   | 0   | 0   | 0   | 0   | 0   | 0   | 0   | 0   | 0   | 0   | 0   | 0   | 0   | 0   | 0   |
| Klebsiella pneumoniae                         | 0   | 0   | 0   | 0   | 0   | 0   | 0   | 0   | 0   | 0   | 0   | 0   | 0   | 0   | 0   | 0   | 0   | 0   | 0   | 0   | 0   | 0   |
| Actinomyces oris/viscosus                     | 0   | 0   | 0   | 0   | 0   | 0   | 0   | 0   | 0   | 0   | 0   | 0   | 0   | 0   | 0   | 0   | 0   | 0   | 0   | 0   | 0   | 0   |
| Mycobacterium chelonae complex                | 0   | 0   | 0   | 0   | 0   | 0   | 0   | 0   | 0   | 0   | 0   | 0   | 0   | 0   | 0   | 0   | 0   | 0   | 0   | 0   | 0   | 0   |
| Corynebacterium jeddahense                    | 0   | 0   | 0   | 0   | 0   | 0   | 0   | 0   | 0   | 0   | 0   | 0   | 0   | 0   | 0   | 0   | 0   | 0   | 0   | 0   | 0   | 0   |
| Peptostreptococcus stomatis                   | 0   | 0   | 0   | 0   | 0   | 0   | 0   | 0   | 0   | 0   | 0   | 0   | 0   | 0   | 0   | 0   | 0   | 0   | 0   | 0   | 0   | 0   |
| Megasphaera                                   | 0   | 0   | 0   | 0   | 0   | 0   | 0   | 0   | 0   | 0   | 0   | 0   | 0   | 0   | 0   | 0   | 0   | 0   | 0   | 0   | 0   | 0   |
| Campylobacter rectus/showae                   | 0   | 0   | 0   | 0   | 0   | 0   | 0   | 0   | 0   | 0   | 0   | 0   | 0   | 0   | 0   | 0   | 0   | 0   | 0   | 0   | 0   | 0   |
| Staphylococcus carnosus/condimenti            | 0   | 0   | 0   | 0   | 0   | 0   | 0   | 0   | 0   | 0   | 0   | 0   | 0   | 0   | 0   | 0   | 0   | 0   | 0   | 0   | 0   | 0   |
| Prevotella pallens                            | 0   | 0   | 0   | 0   | 0   | 0   | 0   | 0   | 0   | 0   | 0   | 0   | 0   | 0   | 0   | 0   | 0   | 0   | 0   | 0   | 0   | 0   |
| Prolinoborus fasciculus/Acinetobacter lwoffii | 0   | 0   | 0   | 0   | 0   | 0   | 0   | 0   | 0   | 0   | 0   | 0   | 0   | 0   | 0   | 0   | 0   | 0   | 0   | 0   | 0   | 0   |
| Staphylococcus nepalensis                     | 0   | 0   | 0   | 0   | 0   | 0   | 0   | 0   | 0   | 0   | 0   | 0   | 0   | 0   | 0   | 0   | 0   | 0   | 0   | 0   | 0   | 0   |
| Staphylococcaceae                             | 0   | 0   | 0   | 0   | 0   | 0   | 0   | 0   | 0   | 0   | 0   | 0   | 0   | 0   | 0   | 0   | 0   | 0   | 0   | 0   | 0   | 0   |
| Cruoricaptor                                  | 0   | 0   | 0   | 0   | 0   | 0   | 0   | 0   | 0   | 0   | 0   | 0   | 0   | 0   | 0   | 0   | 0   | 0   | 0   | 0   | 0   | 0   |
| [Eubacterium] hallii                          | 0   | 0   | 0   | 0   | 0   | 0   | 0   | 0   | 0   | 0   | 0   | 0   | 0   | 0   | 0   | 0   | 0   | 0   | 0   | 0   | 0   | 0   |
| BVAB1 (species)                               | 0   | 0   | 0   | 0   | 0   | 0   | 0   | 0   | 0   | 0   | 0   | 0   | 0   | 0   | 0   | 0   | 0   | 0   | 0   | 0   | 0   | 0   |
| Stomatobaculum                                | 0   | 0   | 0   | 0   | 0   | 0   | 0   | 0   | 0   | 0   | 0   | 0   | 0   | 0   | 0   | 0   | 0   | 0   | 0   | 0   | 0   | 0   |
| Mycoplasma                                    | 0   | 0   | 0   | 0   | 0   | 0   | 0   | 0   | 0   | 0   | 0   | 0   | 0   | 0   | 0   | 0   | 0   | 0   | 0   | 0   | 0   | 0   |
| Catenibacterium mitsuokai                     | 0   | 0   | 0   | 0   | 0   | 0   | 0   | 0   | 0   | 0   | 0   | 0   | 0   | 0   | 0   | 0   | 0   | 0   | 0   | 0   | 0   | 0   |
| Veillonella parvula                           | 0   | 0   | 0   | 0   | 0   | 0   | 0   | 0   | 0   | 0   | 0   | 0   | 0   | 0   | 0   | 0   | 0   | 0   | 0   | 0   | 0   | 0   |
| Corynebacterium kroppenstedtii                | 0   | 0   | 0   | 0   | 0   | 0   | 0   | 0   | 0   | 0   | 0   | 0   | 0   | 0   | 0   | 0   | 0   | 0   | 0   | 0   | 0   | 0   |
| Eremococcus coleocola                         | 0   | 0   | 0   | 0   | 0   | 0   | 0   | 0   | 0   | 0   | 0   | 0   | 0   | 0   | 0   | 0   | 0   | 0   | 0   | 0   | 0   | 0   |
| Actinomyces europaeus                         | 0   | 0   | 0   | 0   | 0   | 0   | 0   | 0   | 0   | 0   | 0   | 0   | 0   | 0   | 0   | 0   | 0   | 0   | 0   | 0   | 0   | 0   |
| Peptoniphilus senegalensis                    | 0   | 0   | 70  | 0   | 0   | 0   | 0   | 0   | 0   | 0   | 0   | 0   | 0   | 0   | 0   | 0   | 0   | 0   | 0   | 0   | 52  | 0   |
| Corynebacterium afermentans/humii             | 0   | 0   | 0   | 0   | 0   | 0   | 0   | 0   | 0   | 0   | 0   | 0   | 0   | 0   | 0   | 0   | 0   | 0   | 0   | 0   | 0   | 0   |
| Acinetobacter                                 | 0   | 0   | 0   | 0   | 0   | 0   | 0   | 0   | 0   | 0   | 0   | 0   | 0   | 0   | 0   | 0   | 0   | 0   | 0   | 0   | 0   | 0   |
| Eggerthellaceae                               | 0   | 0   | 0   | 0   | 0   | 0   | 0   | 0   | 0   | 0   | 0   | 0   | 0   | 0   | 0   | 0   | 0   | 0   | 0   | 0   | 0   | 0   |
| Corynebacterium mucifaciens                   | 0   | 0   | 0   | 0   | 0   | 0   | 0   | 0   | 0   | 0   | 0   | 0   | 0   | 0   | 0   | 0   | 0   | 0   | 0   | 0   | 0   | 0   |
| Filifactor                                    | 0   | 0   | 0   | 0   | 0   | 0   | 0   | 0   | 0   | 0   | 0   | 0   | 0   | 0   | 0   | 0   | 0   | 0   | 0   | 0   | 0   | 0   |
| Ruminococcus faecis                           | 0   | 0   | 0   | 0   | 0   | 0   | 0   | 0   | 0   | 0   | 0   | 0   | 0   | 0   | 0   | 0   | 0   | 0   | 0   | 0   | 0   | 0   |
| Lactobacillus                                 | 0   | 0   | 0   | 0   | 0   | 0   | 0   | 0   | 0   | 0   | 0   | 0   | 0   | 0   | 0   | 0   | 0   | 0   | 0   | 0   | 0   | 0   |
| Peptoniphilus grossensis/rhinitidis           | 0   | 0   | 0   | 0   | 0   | 0   | 0   | 0   | 0   | 0   | 0   | 0   | 0   | 0   | 0   | 0   | 0   | 0   | 0   | 0   | 0   | 0   |
| Aerococcus urinaequi/viridans                 | 0   | 0   | 0   | 0   | 0   | 0   | 0   | 0   | 0   | 0   | 0   | 0   | 0   | 0   | 0   | 0   | 0   | 0   | 0   | 0   | 0   | 0   |
| Anaerostipes hadrus                           | 0   | 0   | 0   | 0   | 0   | 0   | 0   | 0   | 0   | 0   | 0   | 0   | 0   | 0   | 0   | 0   | 0   | 0   | 0   | 0   | 0   | 0   |
| Lagierella                                    | 0   | 0   | 0   | 0   | 0   | 0   | 0   | 0   | 0   | 0   | 0   | 0   | 0   | 0   | 0   | 0   | 0   | 0   | 0   | 0   | 0   | 0   |
| Neisseria cinerea/meningitidis                | 0   | 0   | 0   | 0   | 0   | 0   | 0   | 0   | 0   | 0   | 0   | 0   | 0   | 0   | 0   | 0   | 0   | 0   | 0   | 0   | 0   | 0   |
| Micrococcus lylae                             | 0   | 27  | 0   | 0   | 0   | 0   | 0   | 0   | 0   | 0   | 0   | 0   | 0   | 0   | 0   | 0   | 0   | 0   | 0   | 0   | 0   | 0   |
| Staphylococcus cohnii                         | 0   | 0   | 0   | 0   | 0   | 0   | 0   | 0   | 0   | 0   | 0   | 0   | 0   | 0   | 0   | 0   | 0   | 0   | 0   | 0   | 0   | 0   |
| Casaltella massiliensis                       | 0   | 0   | 0   | 0   | 0   | 0   | 0   | 0   | 0   | 0   | 0   | 0   | 0   | 0   | 0   | 0   | 0   | 0   | 0   | 0   | 0   | 0   |
| Stomatobaculum longum                         | 0   | 0   | 0   | 0   | 0   | 0   | 0   | 0   | 0   | 0   | 0   | 0   | 0   | 0   | 0   | 0   | 0   | 0   | 0   | 0   | 0   | 0   |
| Lautropia                                     | 0   | 0   | 0   | 0   | 0   | 0   | 0   | 0   | 0   | 0   | 0   | 0   | 0   | 0   | 0   | 0   | 0   | 0   | 0   | 0   | 0   | 0   |
| Fastidiosipila                                | 0   | 177 | 0   | 0   | 0   | 0   | 0   | 0   | 0   | 0   | 0   | 0   | 0   | 0   | 0   | 0   | 0   | 0   | 0   | 0   | 0   | 0   |

Samples S01 - S26

| Species                                      | S01 | S02 | S03 | S04 | S05 | S06 | S07 | S08 | S09 | S10 | S11 | S12 | S14 | S15 | S16 | S18 | S19 | S20 | S21 | S23 | S24 | S26 |
|----------------------------------------------|-----|-----|-----|-----|-----|-----|-----|-----|-----|-----|-----|-----|-----|-----|-----|-----|-----|-----|-----|-----|-----|-----|
| Corynebacterium durum                        | 0   | 0   | 0   | 0   | 0   | 0   | 0   | 0   | 0   | 0   | 0   | 0   | 0   | 0   | 0   | 0   | 0   | 0   | 0   | 0   | 0   | 0   |
| Actinomyces graevenitzi                      | 0   | 0   | 0   | 0   | 0   | 0   | 0   | 0   | 0   | 0   | 0   | 0   | 0   | 0   | 0   | 0   | 0   | 0   | 0   | 0   | 0   | 0   |
| Staphylococcus cohnii/saprophyticus          | 0   | 0   | 0   | 0   | 0   | 0   | 0   | 0   | 0   | 0   | 0   | 0   | 0   | 0   | 0   | 0   | 0   | 0   | 0   | 0   | 0   | 0   |
| Leptotrichia trevisanii                      | 0   | 0   | 0   | 0   | 0   | 0   | 0   | 0   | 0   | 0   | 0   | 0   | 0   | 0   | 0   | 0   | 0   | 0   | 0   | 0   | 0   | 0   |
| Candidatus Paraburkholderia calva            | 0   | 0   | 0   | 0   | 0   | 0   | 0   | 0   | 0   | 0   | 0   | 0   | 0   | 0   | 0   | 0   | 0   | 0   | 0   | 0   | 0   | 0   |
| Actinomyces urogenitalis                     | 0   | 0   | 0   | 0   | 0   | 0   | 0   | 0   | 0   | 0   | 0   | 0   | 0   | 0   | 0   | 0   | 0   | 0   | 0   | 0   | 0   | 0   |
| Clostridiales                                | 0   | 0   | 0   | 0   | 0   | 0   | 0   | 0   | 0   | 0   | 0   | 0   | 0   | 0   | 0   | 0   | 0   | 0   | 0   | 0   | 0   | 0   |
| Pasteurella caballi                          | 0   | 0   | 0   | 0   | 0   | 0   | 0   | 0   | 0   | 0   | 0   | 0   | 0   | 0   | 0   | 0   | 0   | 0   | 0   | 0   | 0   | 0   |
| Fusobacterium hwasookii/nucleatum            | 0   | 0   | 0   | 0   | 0   | 0   | 0   | 0   | 0   | 0   | 0   | 0   | 0   | 0   | 0   | 0   | 0   | 0   | 0   | 0   | 0   | 0   |
| Corynebacterium riegelii                     | 0   | 0   | 0   | 0   | 0   | 0   | 0   | 0   | 0   | 0   | 0   | 0   | 0   | 0   | 0   | 0   | 0   | 0   | 0   | 0   | 0   | 0   |
| Hafnia                                       | 0   | 0   | 0   | 0   | 0   | 0   | 0   | 0   | 0   | 0   | 0   | 0   | 0   | 0   | 0   | 0   | 0   | 0   | 0   | 0   | 0   | 0   |
| Staphylococcus equorum/saprophyticus/xylosum | 0   | 0   | 0   | 0   | 0   | 0   | 0   | 0   | 0   | 0   | 0   | 0   | 0   | 0   | 0   | 0   | 0   | 0   | 0   | 0   | 0   | 0   |
| Acinetobacter lwoffii                        | 0   | 0   | 0   | 0   | 0   | 0   | 0   | 0   | 0   | 0   | 0   | 0   | 0   | 0   | 0   | 0   | 0   | 0   | 0   | 0   | 0   | 0   |
| Micrococcus cohnii                           | 0   | 0   | 0   | 0   | 0   | 0   | 0   | 0   | 0   | 0   | 0   | 0   | 0   | 0   | 0   | 0   | 0   | 0   | 0   | 0   | 0   | 0   |
| Pseudoclavibacter faecalis                   | 0   | 0   | 0   | 0   | 0   | 0   | 0   | 0   | 0   | 0   | 0   | 0   | 0   | 0   | 0   | 0   | 0   | 0   | 0   | 0   | 0   | 0   |
| Leptotrichia buccalis                        | 0   | 0   | 0   | 0   | 0   | 0   | 0   | 0   | 0   | 0   | 0   | 0   | 0   | 0   | 0   | 0   | 0   | 0   | 0   | 0   | 0   | 0   |
| Actinomyces                                  | 0   | 0   | 0   | 0   | 0   | 0   | 0   | 0   | 0   | 0   | 0   | 0   | 0   | 0   | 0   | 0   | 0   | 0   | 0   | 0   | 0   | 0   |
| Fusobacterium nucleatum/periodonticum        | 0   | 0   | 0   | 0   | 0   | 0   | 0   | 0   | 0   | 0   | 0   | 0   | 0   | 0   | 0   | 0   | 0   | 0   | 0   | 0   | 0   | 0   |
| Lactobacillus saerimneri                     | 0   | 0   | 0   | 0   | 0   | 0   | 0   | 0   | 0   | 0   | 0   | 0   | 0   | 0   | 0   | 0   | 0   | 0   | 0   | 0   | 0   | 0   |
| Actinomycetaceae                             | 0   | 87  | 0   | 0   | 0   | 0   | 0   | 0   | 0   | 0   | 0   | 0   | 0   | 0   | 0   | 0   | 0   | 0   | 0   | 0   | 0   | 0   |
| Dialister                                    | 0   | 0   | 0   | 0   | 0   | 0   | 0   | 0   | 0   | 0   | 0   | 0   | 0   | 0   | 0   | 0   | 0   | 0   | 0   | 0   | 0   | 0   |
| Neisseria mucosa/subflava                    | 0   | 0   | 0   | 0   | 0   | 0   | 0   | 0   | 0   | 0   | 0   | 0   | 0   | 0   | 0   | 0   | 0   | 0   | 0   | 0   | 0   | 0   |
| Paracoccus                                   | 0   | 0   | 0   | 0   | 0   | 0   | 0   | 0   | 0   | 0   | 0   | 0   | 0   | 0   | 0   | 0   | 0   | 0   | 0   | 0   | 0   | 0   |
| Acinetobacter haemolyticus/johnsonii         | 0   | 0   | 0   | 0   | 0   | 0   | 0   | 0   | 0   | 0   | 0   | 0   | 0   | 0   | 0   | 0   | 0   | 0   | 0   | 0   | 0   | 0   |
| Neisseria subflava                           | 0   | 0   | 0   | 0   | 0   | 0   | 0   | 0   | 0   | 0   | 0   | 0   | 0   | 0   | 0   | 0   | 0   | 0   | 0   | 0   | 0   | 0   |
| Acinetobacter proteolyticus                  | 0   | 0   | 0   | 0   | 0   | 0   | 0   | 0   | 0   | 0   | 0   | 0   | 0   | 0   | 0   | 0   | 0   | 0   | 0   | 0   | 0   | 0   |
| Dorea formicigenerans                        | 0   | 0   | 0   | 0   | 0   | 0   | 0   | 0   | 0   | 0   | 0   | 0   | 0   | 0   | 0   | 0   | 0   | 0   | 0   | 0   | 0   | 0   |
| Corynebacterium tuscaniense                  | 0   | 0   | 0   | 0   | 0   | 0   | 0   | 0   | 0   | 0   | 0   | 0   | 0   | 0   | 0   | 0   | 0   | 0   | 0   | 0   | 0   | 0   |
| Massiliomicrobiota timonensis                | 0   | 0   | 0   | 0   | 0   | 0   | 0   | 0   | 0   | 0   | 0   | 0   | 0   | 0   | 0   | 0   | 0   | 0   | 0   | 0   | 0   | 0   |
| Fusobacterium hwasookii                      | 0   | 0   | 0   | 0   | 0   | 0   | 0   | 0   | 0   | 0   | 0   | 0   | 0   | 0   | 0   | 0   | 0   | 0   | 0   | 0   | 0   | 0   |
| Pseudoglutamicibacter albus                  | 0   | 0   | 0   | 0   | 0   | 0   | 0   | 0   | 0   | 0   | 0   | 0   | 0   | 0   | 0   | 0   | 0   | 0   | 0   | 0   | 0   | 0   |
| Clostridiales Family XIII. Incertae Sedis    | 0   | 0   | 0   | 0   | 0   | 0   | 0   | 0   | 0   | 0   | 0   | 0   | 0   | 0   | 0   | 0   | 0   | 0   | 0   | 0   | 0   | 0   |
| Kocuria marina/rhizophila                    | 0   | 0   | 0   | 0   | 0   | 0   | 0   | 0   | 0   | 0   | 0   | 0   | 0   | 0   | 0   | 0   | 0   | 0   | 0   | 0   | 0   | 0   |
| Kocuria                                      | 0   | 0   | 0   | 0   | 0   | 0   | 0   | 0   | 0   | 0   | 0   | 0   | 0   | 0   | 0   | 0   | 0   | 0   | 0   | 0   | 0   | 0   |
| Alloprevotella rava                          | 0   | 0   | 0   | 0   | 0   | 0   | 0   | 0   | 0   | 0   | 0   | 0   | 0   | 0   | 0   | 0   | 0   | 0   | 0   | 0   | 0   | 0   |
| Staphylococcus pettenkoferi                  | 0   | 0   | 0   | 0   | 0   | 0   | 0   | 0   | 0   | 0   | 0   | 0   | 0   | 0   | 0   | 0   | 0   | 0   | 0   | 0   | 0   | 0   |
| Streptococcus pseudoporcinus                 | 0   | 0   | 0   | 0   | 0   | 0   | 0   | 0   | 0   | 0   | 0   | 0   | 0   | 0   | 0   | 0   | 0   | 0   | 0   | 0   | 0   | 0   |
| Kingella                                     | 0   | 0   | 0   | 0   | 0   | 0   | 0   | 0   | 0   | 0   | 0   | 0   | 0   | 0   | 0   | 0   | 0   | 0   | 0   | 0   | 0   | 0   |
| Eikenella                                    | 0   | 0   | 0   | 0   | 0   | 0   | 0   | 0   | 0   | 0   | 0   | 0   | 0   | 0   | 0   | 0   | 0   | 0   | 0   | 0   | 0   | 0   |
| Actinomyces odontolyticus                    | 0   | 0   | 0   | 0   | 0   | 0   | 0   | 0   | 0   | 0   | 0   | 0   | 0   | 0   | 0   | 0   | 0   | 0   | 0   | 0   | 0   | 0   |
| Corynebacterium sphenisci                    | 0   | 0   | 0   | 0   | 0   | 0   | 0   | 0   | 0   | 0   | 0   | 0   | 0   | 0   | 0   | 0   | 0   | 0   | 0   | 0   | 0   | 0   |
| Cutibacterium                                | 0   | 0   | 0   | 0   | 0   | 0   | 0   | 0   | 0   | 0   | 0   | 0   | 0   | 0   | 0   | 0   | 0   | 0   | 0   | 0   | 0   | 0   |
| Staphylococcus xylosum                       | 0   | 0   | 0   | 0   | 0   | 0   | 0   | 0   | 0   | 0   | 0   | 0   | 0   | 0   | 0   | 0   | 0   | 0   | 0   | 0   | 0   | 0   |
| Burkholderiales                              | 0   | 0   | 0   | 0   | 0   | 0   | 0   | 0   | 0   | 0   | 0   | 0   | 0   | 0   | 0   | 0   | 0   | 0   | 0   | 0   | 0   | 0   |
| Massiliomicrobiota/Mycoplasma                | 0   | 0   | 0   | 0   | 0   | 0   | 0   | 0   | 0   | 0   | 0   | 0   | 0   | 0   | 0   | 0   | 0   | 0   | 0   | 0   | 0   | 0   |
| Bacteroidales                                | 0   | 0   | 0   | 0   | 0   | 0   | 0   | 0   | 0   | 0   | 0   | 0   | 0   | 0   | 0   | 0   | 0   | 0   | 0   | 0   | 0   | 0   |
| Campylobacter fetus                          | 0   | 0   | 0   | 0   | 0   | 0   | 0   | 0   | 0   | 0   | 0   | 0   | 0   | 0   | 0   | 0   | 0   | 0   | 0   | 0   | 0   | 0   |
| Prevotella aurantiaca                        | 0   | 0   | 0   | 0   | 0   | 0   | 0   | 0   | 0   | 0   | 0   | 0   | 0   | 0   | 0   | 0   | 0   | 0   | 0   | 0   | 0   | 0   |
| Corynebacterium freneyi/xerosis              | 0   | 0   | 0   | 0   | 0   | 0   | 0   | 0   | 0   | 0   | 0   | 0   | 0   | 0   | 0   | 0   | 0   | 0   | 0   | 0   | 0   | 0   |
| Aerococcaceae                                | 0   | 25  | 0   | 0   | 0   | 0   | 0   | 0   | 0   | 0   | 0   | 0   | 0   | 0   | 0   | 0   | 0   | 0   | 0   | 0   | 0   | 0   |
| Moraxella lacunata                           | 0   | 0   | 0   | 0   | 0   | 0   | 0   | 0   | 0   | 0   | 0   | 0   | 0   | 0   | 0   | 0   | 0   | 0   | 0   | 0   | 0   | 0   |
| Corynebacterium accolens/macginleyi          | 0   | 0   | 0   | 0   | 0   | 0   | 0   | 0   | 0   | 0   | 0   | 0   | 0   | 0   | 0   | 0   | 0   | 0   | 0   | 0   | 0   | 0   |
| Massilia aurea                               | 0   | 0   | 0   | 0   | 0   | 0   | 0   | 0   | 0   | 0   | 0   | 0   | 0   | 0   | 0   | 0   | 0   | 0   | 0   | 0   | 0   | 0   |
| Corynebacterium casei                        | 0   | 0   | 0   | 0   | 0   | 0   | 0   | 0   | 0   | 0   | 0   | 0   | 0   | 0   | 0   | 0   | 0   | 0   | 0   | 0   | 0   | 0   |
| Helcococcus sueciensis                       | 0   | 0   | 0   | 0   | 0   | 0   | 0   | 0   | 0   | 0   | 0   | 0   | 0   | 0   | 0   | 0   | 0   | 0   | 0   | 0   | 0   | 0   |
| Lactobacillus casei/rhannosus                | 0   | 0   | 0   | 0   | 0   | 0   | 0   | 0   | 0   | 0   | 0   | 0   | 0   | 0   | 0   | 0   | 0   | 0   | 0   | 0   | 0   | 0   |
| Holdemanella biformis                        | 0   | 0   | 0   | 0   | 0   | 0   | 0   | 0   | 0   | 0   | 0   | 0   | 0   | 0   | 0   | 0   | 0   | 0   | 0   | 0   | 0   | 0   |
| Pelistega                                    | 0   | 0   | 0   | 0   | 0   | 0   | 0   | 0   | 0   | 0   | 0   | 0   | 0   | 0   | 0   | 0   | 0   | 0   | 0   | 0   | 0   | 0   |
| Actinomyces massiliensis                     | 0   | 0   | 0   | 0   | 0   | 0   | 0   | 0   | 0   | 0   | 0   | 0   | 0   | 0   | 0   | 0   | 0   | 0   | 0   | 0   | 0   | 0   |
| Massilia                                     | 0   | 0   | 0   | 0   | 0   | 0   | 0   | 0   | 0   | 0   | 0   | 0   | 0   | 0   | 0   | 0   | 0   | 0   | 0   | 0   | 0   | 0   |
| Staphylococcus equorum/xylosum               | 0   | 0   | 0   | 0   | 0   | 0   | 0   | 0   | 0   | 0   | 0   | 0   | 0   | 0   | 0   | 0   | 0   | 0   | 0   | 0   | 0   | 0   |
| Streptococcus                                | 0   | 0   | 0   | 0   | 0   | 0   | 0   | 0   | 0   | 0   | 0   | 0   | 0   | 0   | 0   | 0   | 0   | 0   | 0   | 0   | 0   | 0   |
| Cutibacterium avidum                         | 0   | 0   | 0   | 0   | 0   | 0   | 0   | 0   | 0   | 0   | 0   | 0   | 0   | 0   | 0   | 0   | 0   | 0   | 0   | 0   | 0   | 0   |



# Samples S27 - S55

| Species                                                | S27 | S28 | S30 | S31 | S32 | S34 | S35 | S36 | S39  | S40 | S41 | S43 | S44 | S45 | S47 | S48 | S50 | S51 | S52 | S53 | S54 | S55 |
|--------------------------------------------------------|-----|-----|-----|-----|-----|-----|-----|-----|------|-----|-----|-----|-----|-----|-----|-----|-----|-----|-----|-----|-----|-----|
| Peptoniphilus rhinitidis                               | 35  | 0   | 0   | 0   | 0   | 0   | 0   | 0   | 0    | 0   | 0   | 0   | 0   | 0   | 0   | 0   | 0   | 0   | 0   | 0   | 0   | 0   |
| Anaerococcus senegalensis                              | 56  | 0   | 0   | 0   | 0   | 0   | 278 | 0   | 0    | 0   | 0   | 0   | 0   | 0   | 0   | 0   | 0   | 0   | 0   | 0   | 0   | 0   |
| Peptostreptococcus anaerobius                          | 0   | 0   | 0   | 0   | 0   | 0   | 0   | 0   | 194  | 0   | 0   | 0   | 0   | 0   | 0   | 0   | 0   | 0   | 0   | 0   | 0   | 0   |
| Dialister propionificaciens                            | 0   | 0   | 0   | 0   | 0   | 0   | 0   | 0   | 0    | 0   | 0   | 0   | 0   | 0   | 0   | 0   | 0   | 0   | 0   | 0   | 0   | 0   |
| Peptoniphilus harei                                    | 0   | 0   | 0   | 0   | 0   | 0   | 0   | 0   | 0    | 0   | 0   | 0   | 0   | 0   | 0   | 0   | 0   | 0   | 0   | 0   | 0   | 0   |
| Negativicoccus succinicivorans                         | 0   | 0   | 0   | 0   | 0   | 0   | 0   | 0   | 28   | 0   | 0   | 0   | 0   | 0   | 0   | 0   | 0   | 85  | 0   | 0   | 0   | 0   |
| Parvimonas micra                                       | 0   | 0   | 0   | 0   | 0   | 0   | 0   | 0   | 237  | 0   | 0   | 0   | 0   | 0   | 0   | 0   | 0   | 0   | 0   | 0   | 0   | 0   |
| Actinomyces ihumii                                     | 0   | 0   | 0   | 0   | 0   | 0   | 0   | 0   | 0    | 0   | 0   | 0   | 0   | 0   | 0   | 0   | 0   | 0   | 0   | 0   | 0   | 0   |
| Actinotignum timonense                                 | 0   | 0   | 0   | 0   | 0   | 0   | 0   | 0   | 0    | 0   | 0   | 0   | 0   | 0   | 0   | 0   | 0   | 0   | 0   | 0   | 0   | 0   |
| Fenollaria                                             | 0   | 0   | 0   | 0   | 0   | 0   | 0   | 0   | 1940 | 0   | 0   | 0   | 0   | 0   | 0   | 0   | 0   | 0   | 0   | 0   | 0   | 0   |
| Fusobacterium massiliense                              | 0   | 0   | 0   | 0   | 0   | 0   | 0   | 0   | 0    | 0   | 0   | 0   | 0   | 0   | 0   | 0   | 0   | 0   | 0   | 0   | 0   | 0   |
| Actinobaculum massiliense                              | 0   | 0   | 0   | 0   | 0   | 0   | 0   | 0   | 153  | 0   | 0   | 0   | 0   | 0   | 0   | 0   | 0   | 0   | 0   | 0   | 0   | 0   |
| Peptoniphilus coxii                                    | 0   | 0   | 0   | 0   | 0   | 48  | 0   | 0   | 27   | 0   | 0   | 0   | 0   | 0   | 0   | 57  | 0   | 0   | 0   | 0   | 0   | 0   |
| Staphylococcus lugdunensis                             | 0   | 0   | 0   | 0   | 0   | 0   | 0   | 0   | 0    | 0   | 0   | 0   | 0   | 0   | 0   | 0   | 0   | 0   | 0   | 0   | 0   | 0   |
| Dermabacter                                            | 352 | 0   | 0   | 0   | 0   | 0   | 584 | 0   | 0    | 0   | 0   | 0   | 0   | 0   | 0   | 0   | 0   | 0   | 0   | 0   | 0   | 0   |
| Alloscardovia omnicolens                               | 0   | 0   | 0   | 0   | 0   | 0   | 0   | 0   | 0    | 0   | 0   | 0   | 0   | 0   | 0   | 0   | 0   | 0   | 0   | 0   | 0   | 0   |
| Varibaculum cambriense                                 | 0   | 0   | 0   | 0   | 0   | 0   | 0   | 0   | 546  | 0   | 0   | 0   | 0   | 0   | 0   | 0   | 0   | 0   | 0   | 0   | 0   | 0   |
| Streptococcus urinalis                                 | 0   | 112 | 0   | 0   | 0   | 0   | 0   | 0   | 0    | 0   | 0   | 0   | 0   | 0   | 0   | 0   | 0   | 0   | 0   | 0   | 0   | 0   |
| Corynebacterium appendicis                             | 0   | 0   | 0   | 0   | 0   | 0   | 63  | 0   | 40   | 0   | 0   | 0   | 0   | 0   | 132 | 0   | 0   | 0   | 0   | 0   | 0   | 0   |
| Actinotignum schaalii                                  | 0   | 0   | 0   | 0   | 0   | 0   | 0   | 0   | 757  | 0   | 0   | 0   | 0   | 0   | 0   | 0   | 0   | 0   | 0   | 0   | 0   | 0   |
| Corynebacterium timonense                              | 0   | 0   | 0   | 0   | 0   | 0   | 0   | 0   | 1735 | 0   | 0   | 0   | 0   | 0   | 0   | 0   | 0   | 0   | 0   | 0   | 0   | 0   |
| Gemella                                                | 0   | 0   | 0   | 0   | 0   | 0   | 0   | 0   | 0    | 0   | 0   | 0   | 0   | 0   | 0   | 0   | 0   | 0   | 0   | 0   | 0   | 0   |
| Klebsiella aerogenes/Enterobacter asburiae             | 0   | 0   | 0   | 0   | 0   | 0   | 0   | 0   | 0    | 0   | 0   | 0   | 0   | 0   | 0   | 0   | 0   | 0   | 0   | 0   | 0   | 0   |
| Fusobacterium periodonticum                            | 0   | 0   | 0   | 0   | 0   | 0   | 0   | 0   | 0    | 0   | 0   | 0   | 0   | 0   | 0   | 0   | 0   | 0   | 0   | 0   | 0   | 0   |
| Veillonella dispar                                     | 0   | 0   | 0   | 0   | 0   | 0   | 0   | 0   | 0    | 0   | 0   | 0   | 0   | 0   | 0   | 0   | 0   | 0   | 0   | 0   | 0   | 0   |
| Prevotella colorans                                    | 0   | 0   | 0   | 0   | 0   | 0   | 0   | 0   | 1634 | 0   | 0   | 0   | 0   | 0   | 0   | 0   | 0   | 0   | 0   | 0   | 0   | 0   |
| Candidatus Peptoniphilus massiliensis                  | 0   | 0   | 0   | 0   | 0   | 0   | 0   | 0   | 339  | 0   | 0   | 0   | 0   | 0   | 0   | 0   | 0   | 0   | 0   | 0   | 0   | 0   |
| Eremococcus                                            | 486 | 0   | 0   | 0   | 43  | 0   | 728 | 0   | 0    | 0   | 0   | 0   | 0   | 0   | 0   | 0   | 0   | 0   | 0   | 0   | 0   | 0   |
| Varibaculum anthropi                                   | 0   | 0   | 0   | 0   | 0   | 0   | 0   | 0   | 155  | 0   | 0   | 0   | 0   | 0   | 0   | 0   | 0   | 0   | 0   | 0   | 0   | 0   |
| Propionimicrobium lymphophilum                         | 0   | 0   | 0   | 0   | 0   | 0   | 0   | 0   | 115  | 0   | 0   | 0   | 0   | 0   | 0   | 0   | 0   | 0   | 0   | 0   | 0   | 0   |
| Streptococcus dysgalactiae                             | 0   | 0   | 0   | 0   | 0   | 0   | 0   | 0   | 0    | 0   | 0   | 0   | 0   | 0   | 0   | 0   | 0   | 0   | 0   | 0   | 0   | 0   |
| Negativicoccus                                         | 0   | 0   | 0   | 0   | 0   | 0   | 0   | 0   | 548  | 0   | 0   | 0   | 0   | 0   | 0   | 0   | 0   | 0   | 0   | 0   | 0   | 0   |
| Porphyromonas somerae                                  | 0   | 0   | 0   | 0   | 0   | 0   | 0   | 0   | 0    | 0   | 0   | 0   | 0   | 0   | 0   | 0   | 0   | 0   | 0   | 0   | 0   | 0   |
| Corynebacterium jeikeium                               | 51  | 0   | 0   | 0   | 0   | 0   | 0   | 0   | 0    | 0   | 0   | 0   | 0   | 0   | 0   | 0   | 0   | 0   | 0   | 0   | 0   | 0   |
| Mobiluncus curtisii                                    | 0   | 0   | 0   | 0   | 0   | 0   | 0   | 0   | 1010 | 0   | 0   | 0   | 0   | 0   | 0   | 0   | 0   | 0   | 0   | 0   | 0   | 0   |
| Porphyromonas uenonis                                  | 0   | 0   | 0   | 0   | 0   | 0   | 0   | 0   | 1954 | 0   | 0   | 0   | 0   | 0   | 0   | 0   | 0   | 0   | 0   | 0   | 0   | 0   |
| Aerococcus urinae                                      | 0   | 0   | 0   | 0   | 0   | 0   | 0   | 0   | 547  | 0   | 0   | 0   | 0   | 0   | 0   | 0   | 0   | 0   | 0   | 0   | 0   | 0   |
| Corynebacterium mycetoides                             | 0   | 0   | 0   | 0   | 0   | 0   | 0   | 55  | 0    | 0   | 0   | 0   | 0   | 0   | 0   | 0   | 0   | 0   | 0   | 0   | 0   | 0   |
| Cutibacterium acnes                                    | 0   | 0   | 0   | 0   | 0   | 0   | 0   | 0   | 0    | 0   | 0   | 0   | 0   | 0   | 0   | 0   | 0   | 0   | 0   | 0   | 0   | 0   |
| Urinacoccus massiliensis                               | 0   | 0   | 0   | 0   | 0   | 0   | 0   | 0   | 349  | 0   | 0   | 0   | 0   | 0   | 0   | 0   | 0   | 0   | 0   | 0   | 0   | 0   |
| Campylobacter hominis                                  | 0   | 0   | 0   | 0   | 0   | 0   | 0   | 0   | 0    | 0   | 0   | 0   | 0   | 0   | 0   | 0   | 0   | 0   | 0   | 0   | 0   | 0   |
| Staphylococcus capitis/caprae                          | 0   | 0   | 0   | 0   | 0   | 0   | 99  | 0   | 0    | 57  | 0   | 0   | 0   | 0   | 0   | 0   | 0   | 0   | 0   | 0   | 0   | 0   |
| Sneathia                                               | 0   | 0   | 0   | 0   | 0   | 0   | 0   | 0   | 0    | 0   | 0   | 0   | 0   | 0   | 0   | 0   | 0   | 0   | 0   | 0   | 0   | 0   |
| Prevotella jejuni                                      | 0   | 0   | 0   | 0   | 0   | 0   | 0   | 0   | 0    | 0   | 0   | 0   | 0   | 0   | 0   | 0   | 0   | 0   | 0   | 0   | 0   | 0   |
| Varibaculum                                            | 0   | 0   | 0   | 0   | 0   | 0   | 0   | 0   | 2612 | 0   | 0   | 0   | 0   | 0   | 0   | 0   | 0   | 0   | 0   | 0   | 0   | 0   |
| Corynebacterium striatum                               | 0   | 0   | 0   | 0   | 0   | 0   | 0   | 0   | 0    | 0   | 0   | 0   | 0   | 0   | 0   | 0   | 0   | 0   | 0   | 0   | 0   | 0   |
| Jonquetella anthropi                                   | 0   | 0   | 0   | 0   | 0   | 0   | 0   | 0   | 0    | 0   | 0   | 0   | 0   | 0   | 0   | 0   | 0   | 0   | 0   | 0   | 0   | 0   |
| Peptoniphilus koenoenieniae                            | 0   | 0   | 0   | 0   | 0   | 0   | 0   | 0   | 69   | 0   | 0   | 0   | 0   | 0   | 0   | 0   | 0   | 0   | 0   | 0   | 0   | 0   |
| Bifidobacterium longum                                 | 0   | 0   | 0   | 0   | 0   | 0   | 0   | 0   | 0    | 0   | 0   | 0   | 0   | 0   | 0   | 0   | 0   | 0   | 0   | 0   | 0   | 0   |
| Helicobacter                                           | 0   | 0   | 0   | 0   | 0   | 0   | 0   | 0   | 0    | 0   | 0   | 0   | 0   | 0   | 0   | 0   | 0   | 0   | 0   | 0   | 0   | 0   |
| Lawsonella clevelandensis                              | 0   | 0   | 0   | 0   | 0   | 0   | 0   | 0   | 0    | 0   | 0   | 0   | 0   | 0   | 0   | 0   | 0   | 0   | 0   | 0   | 0   | 0   |
| Escherichia coli/fergusonii                            | 0   | 0   | 0   | 0   | 0   | 0   | 0   | 0   | 0    | 0   | 0   | 0   | 0   | 0   | 0   | 0   | 0   | 0   | 0   | 0   | 0   | 0   |
| Fusobacterium nucleatum                                | 0   | 0   | 0   | 0   | 0   | 0   | 0   | 0   | 3176 | 0   | 140 | 0   | 0   | 0   | 0   | 0   | 0   | 0   | 0   | 0   | 0   | 0   |
| Porphyromonas asaccharolytica                          | 0   | 0   | 0   | 0   | 0   | 0   | 0   | 0   | 0    | 0   | 0   | 0   | 0   | 0   | 0   | 0   | 0   | 0   | 0   | 0   | 0   | 0   |
| Anaerococcus octavius                                  | 0   | 0   | 0   | 0   | 0   | 0   | 0   | 0   | 0    | 0   | 0   | 0   | 0   | 0   | 35  | 0   | 0   | 0   | 0   | 0   | 0   | 0   |
| Fusobacterium                                          | 0   | 0   | 0   | 0   | 0   | 0   | 0   | 0   | 0    | 0   | 0   | 0   | 0   | 0   | 0   | 0   | 0   | 0   | 0   | 0   | 0   | 0   |
| Corynebacterium phoceense                              | 0   | 0   | 0   | 0   | 0   | 0   | 0   | 0   | 0    | 0   | 0   | 0   | 0   | 0   | 0   | 0   | 0   | 0   | 0   | 0   | 0   | 0   |
| Ruminococcus                                           | 0   | 0   | 0   | 0   | 0   | 0   | 0   | 0   | 0    | 0   | 0   | 0   | 0   | 0   | 0   | 0   | 0   | 0   | 0   | 0   | 0   | 0   |
| Arcanobacterium                                        | 0   | 0   | 0   | 0   | 0   | 0   | 0   | 0   | 114  | 0   | 0   | 0   | 0   | 0   | 0   | 0   | 0   | 0   | 0   | 0   | 0   | 0   |
| Khoudiadiopia                                          | 0   | 0   | 0   | 0   | 0   | 0   | 0   | 0   | 0    | 0   | 0   | 0   | 0   | 0   | 0   | 0   | 0   | 0   | 0   | 0   | 0   | 0   |
| Atopobium deltae                                       | 0   | 0   | 0   | 0   | 0   | 0   | 0   | 0   | 1162 | 0   | 0   | 0   | 0   | 0   | 0   | 0   | 0   | 0   | 0   | 0   | 0   | 0   |
| Haemophilus parahaemolyticus                           | 0   | 0   | 0   | 0   | 0   | 0   | 0   | 0   | 0    | 0   | 0   | 0   | 0   | 0   | 0   | 0   | 0   | 0   | 0   | 0   | 0   | 0   |
| Howardella                                             | 0   | 0   | 0   | 0   | 0   | 0   | 0   | 0   | 366  | 0   | 0   | 0   | 0   | 0   | 0   | 0   | 0   | 0   | 0   | 0   | 0   | 0   |
| Prevotella buccalis                                    | 0   | 0   | 0   | 0   | 0   | 0   | 0   | 0   | 118  | 0   | 0   | 0   | 0   | 0   | 0   | 0   | 0   | 0   | 0   | 0   | 0   | 0   |
| Corynebacterium auris                                  | 0   | 0   | 0   | 0   | 0   | 0   | 0   | 0   | 0    | 0   | 0   | 0   | 0   | 0   | 0   | 0   | 0   | 0   | 0   | 0   | 0   | 0   |
| Candidatus Mycoplasma gireddii                         | 0   | 0   | 0   | 0   | 0   | 0   | 0   | 0   | 0    | 0   | 0   | 0   | 0   | 0   | 0   | 0   | 0   | 0   | 0   | 0   | 0   | 0   |
| Alloicoccus                                            | 0   | 0   | 0   | 0   | 0   | 0   | 0   | 0   | 0    | 0   | 0   | 0   | 0   | 0   | 0   | 0   | 0   | 0   | 0   | 0   | 0   | 0   |
| Corynebacterium founierii/mucifaciens/ureicelerivorans | 76  | 0   | 0   | 0   | 0   | 0   | 72  | 0   | 63   | 0   | 0   | 0   | 0   | 0   | 56  | 0   | 0   | 0   | 0   | 0   | 0   | 0   |
| Corynebacterium auris/timonense                        | 0   | 0   | 0   | 0   | 0   | 0   | 0   | 0   | 0    | 0   | 0   | 0   | 0   | 0   | 0   | 0   | 0   | 0   | 0   | 0   | 0   | 0   |
| Veillonella ratti/seminalis                            | 0   | 0   | 0   | 0   | 0   | 0   | 0   | 0   | 0    | 0   | 0   | 0   | 0   | 0   | 0   | 0   | 0   | 0   | 0   | 0   | 0   | 0   |

Samples S27 - S55

| Species                                    | S27 | S28 | S30 | S31 | S32 | S34 | S35 | S36 | S39 | S40 | S41 | S43 | S44 | S45 | S47 | S48 | S50 | S51 | S52 | S53 | S54 | S55 |
|--------------------------------------------|-----|-----|-----|-----|-----|-----|-----|-----|-----|-----|-----|-----|-----|-----|-----|-----|-----|-----|-----|-----|-----|-----|
| Lactobacillus gasseri                      | 0   | 0   | 0   | 0   | 0   | 0   | 0   | 0   | 0   | 0   | 0   | 0   | 0   | 0   | 0   | 0   | 0   | 0   | 131 | 0   | 0   | 0   |
| Tissierella                                | 0   | 0   | 0   | 0   | 0   | 0   | 0   | 0   | 190 | 0   | 0   | 0   | 0   | 0   | 0   | 0   | 0   | 0   | 0   | 0   | 0   | 0   |
| Granulicatella adiacens                    | 0   | 0   | 0   | 0   | 0   | 0   | 0   | 0   | 0   | 0   | 0   | 0   | 0   | 0   | 0   | 0   | 0   | 0   | 0   | 0   | 0   | 0   |
| Sutterella                                 | 0   | 0   | 0   | 0   | 0   | 0   | 0   | 0   | 0   | 0   | 0   | 0   | 0   | 0   | 0   | 0   | 0   | 0   | 0   | 0   | 0   | 0   |
| Prevotella nanceiensis                     | 0   | 0   | 0   | 0   | 0   | 0   | 0   | 0   | 0   | 0   | 0   | 0   | 0   | 0   | 0   | 0   | 0   | 0   | 0   | 0   | 0   | 0   |
| Lactobacillus jensenii                     | 0   | 0   | 0   | 0   | 0   | 0   | 0   | 0   | 0   | 0   | 0   | 0   | 0   | 0   | 0   | 0   | 0   | 0   | 0   | 0   | 0   | 0   |
| Lactobacillus crispatus                    | 0   | 0   | 0   | 0   | 0   | 0   | 0   | 0   | 257 | 0   | 0   | 0   | 0   | 0   | 0   | 0   | 0   | 0   | 0   | 0   | 0   | 0   |
| Candidate Division TM7 vaginal (genus)     | 0   | 0   | 0   | 0   | 0   | 0   | 0   | 0   | 0   | 0   | 0   | 0   | 0   | 0   | 0   | 0   | 0   | 0   | 0   | 0   | 0   | 0   |
| Candidatus Saccharimonas                   | 0   | 0   | 0   | 0   | 0   | 0   | 0   | 0   | 0   | 0   | 0   | 0   | 0   | 0   | 0   | 0   | 0   | 0   | 0   | 0   | 0   | 0   |
| Peptococcus niger                          | 0   | 0   | 0   | 0   | 0   | 0   | 0   | 0   | 34  | 0   | 0   | 0   | 0   | 0   | 0   | 0   | 0   | 0   | 0   | 0   | 0   | 0   |
| Neisseria flavescens/perflava              | 0   | 0   | 0   | 0   | 0   | 0   | 0   | 0   | 0   | 0   | 0   | 0   | 0   | 0   | 0   | 0   | 0   | 0   | 0   | 0   | 0   | 0   |
| Gemella sanguinis                          | 0   | 0   | 0   | 0   | 0   | 0   | 0   | 0   | 0   | 0   | 0   | 0   | 0   | 0   | 0   | 0   | 0   | 0   | 0   | 0   | 0   | 0   |
| Porphyromonas                              | 0   | 0   | 0   | 0   | 0   | 0   | 0   | 0   | 0   | 0   | 0   | 0   | 0   | 0   | 0   | 0   | 0   | 0   | 0   | 0   | 0   | 0   |
| Prevotella                                 | 0   | 0   | 0   | 0   | 0   | 0   | 0   | 0   | 0   | 0   | 0   | 0   | 0   | 0   | 0   | 0   | 0   | 0   | 0   | 0   | 0   | 0   |
| Corynebacterium thomssenii                 | 135 | 0   | 0   | 0   | 0   | 41  | 36  | 0   | 0   | 0   | 0   | 0   | 0   | 0   | 34  | 0   | 0   | 0   | 0   | 0   | 0   | 0   |
| Lachnospiraceae                            | 0   | 0   | 0   | 0   | 0   | 0   | 0   | 0   | 0   | 0   | 0   | 0   | 0   | 0   | 0   | 0   | 0   | 0   | 0   | 0   | 0   | 0   |
| Corynebacterium tuberculoostearicum        | 0   | 0   | 0   | 0   | 0   | 0   | 0   | 0   | 0   | 0   | 0   | 0   | 0   | 0   | 0   | 0   | 0   | 0   | 0   | 0   | 0   | 0   |
| Dermabacter hominis                        | 106 | 0   | 0   | 0   | 0   | 0   | 0   | 0   | 0   | 0   | 0   | 0   | 0   | 0   | 0   | 0   | 0   | 0   | 0   | 0   | 0   | 0   |
| Veillonella rogosae                        | 0   | 0   | 0   | 0   | 0   | 0   | 0   | 0   | 0   | 0   | 0   | 0   | 0   | 0   | 0   | 0   | 0   | 0   | 0   | 0   | 0   | 0   |
| Actinomyces hongkongensis                  | 0   | 0   | 0   | 0   | 0   | 0   | 0   | 277 | 0   | 0   | 0   | 0   | 0   | 0   | 0   | 0   | 0   | 0   | 0   | 0   | 0   | 0   |
| Veillonella parvula/rogosae                | 0   | 0   | 0   | 0   | 0   | 0   | 0   | 0   | 0   | 0   | 0   | 0   | 0   | 0   | 0   | 0   | 0   | 0   | 0   | 0   | 0   | 0   |
| Anaerococcus provencensis                  | 0   | 0   | 0   | 0   | 0   | 0   | 0   | 0   | 0   | 0   | 0   | 0   | 0   | 0   | 0   | 0   | 0   | 0   | 0   | 0   | 0   | 0   |
| Porphyromonas sp. type 1                   | 0   | 0   | 0   | 0   | 0   | 0   | 0   | 0   | 0   | 0   | 0   | 0   | 0   | 0   | 0   | 0   | 0   | 0   | 0   | 0   | 0   | 0   |
| Brevibacterium paucivorans                 | 216 | 0   | 0   | 0   | 0   | 0   | 270 | 0   | 0   | 0   | 0   | 0   | 0   | 0   | 0   | 0   | 0   | 0   | 0   | 0   | 0   | 0   |
| Peptostreptococcus                         | 0   | 0   | 0   | 0   | 0   | 0   | 0   | 0   | 0   | 0   | 0   | 0   | 0   | 0   | 0   | 0   | 0   | 0   | 0   | 0   | 0   | 0   |
| Facklamia languida                         | 0   | 0   | 0   | 0   | 0   | 0   | 0   | 0   | 0   | 0   | 0   | 0   | 0   | 0   | 0   | 0   | 0   | 0   | 0   | 0   | 0   | 0   |
| Streptobacillus                            | 0   | 0   | 0   | 0   | 0   | 0   | 0   | 0   | 0   | 0   | 0   | 0   | 0   | 0   | 0   | 0   | 0   | 0   | 0   | 0   | 0   | 0   |
| Gemella haemolysans                        | 0   | 0   | 0   | 0   | 0   | 0   | 0   | 0   | 0   | 0   | 0   | 0   | 0   | 0   | 0   | 0   | 0   | 0   | 0   | 0   | 0   | 0   |
| Haemophilus sputorum                       | 0   | 0   | 0   | 0   | 0   | 0   | 0   | 0   | 0   | 0   | 0   | 0   | 0   | 0   | 0   | 0   | 69  | 0   | 0   | 0   | 0   | 0   |
| Actinotignum urinale                       | 0   | 0   | 0   | 0   | 0   | 0   | 0   | 0   | 0   | 0   | 0   | 0   | 0   | 0   | 0   | 0   | 0   | 0   | 0   | 0   | 0   | 0   |
| Dialister pneumosintes                     | 0   | 0   | 0   | 0   | 0   | 0   | 0   | 0   | 0   | 0   | 0   | 0   | 0   | 0   | 0   | 0   | 0   | 0   | 0   | 0   | 0   | 0   |
| Treponema pallidum                         | 0   | 0   | 0   | 0   | 0   | 0   | 0   | 0   | 0   | 0   | 0   | 0   | 0   | 0   | 0   | 0   | 0   | 0   | 0   | 0   | 0   | 0   |
| Porphyromonas bennoni                      | 0   | 0   | 0   | 0   | 0   | 0   | 0   | 931 | 0   | 0   | 0   | 0   | 0   | 0   | 0   | 0   | 0   | 0   | 0   | 0   | 0   | 0   |
| Bergeyella                                 | 0   | 0   | 0   | 0   | 0   | 0   | 0   | 0   | 0   | 0   | 0   | 0   | 0   | 0   | 0   | 0   | 0   | 0   | 0   | 0   | 0   | 0   |
| Actinotignum schaalii/timonense            | 0   | 0   | 0   | 0   | 0   | 0   | 0   | 0   | 0   | 0   | 0   | 0   | 0   | 0   | 0   | 0   | 0   | 0   | 0   | 0   | 0   | 0   |
| Klebsiella aerogenes/Kluyvera cryocrescens | 0   | 0   | 0   | 0   | 0   | 0   | 0   | 0   | 0   | 0   | 0   | 0   | 0   | 0   | 0   | 0   | 0   | 0   | 0   | 0   | 0   | 0   |
| Rothia mucilaginosa                        | 0   | 0   | 0   | 0   | 0   | 0   | 0   | 0   | 0   | 0   | 0   | 0   | 0   | 0   | 0   | 0   | 0   | 0   | 0   | 0   | 0   | 0   |
| Solobacterium moorei                       | 0   | 0   | 0   | 0   | 0   | 0   | 0   | 0   | 0   | 0   | 0   | 0   | 0   | 0   | 0   | 0   | 0   | 0   | 0   | 0   | 0   | 0   |
| Mageibacillus indolicus                    | 0   | 0   | 0   | 0   | 0   | 0   | 0   | 0   | 0   | 0   | 0   | 0   | 0   | 0   | 0   | 0   | 0   | 0   | 0   | 0   | 0   | 0   |
| Serratia urelytica                         | 0   | 0   | 0   | 0   | 0   | 0   | 0   | 0   | 0   | 0   | 0   | 0   | 0   | 0   | 0   | 0   | 0   | 0   | 0   | 0   | 0   | 0   |
| Peptoniphilus obesi                        | 0   | 0   | 0   | 0   | 0   | 0   | 0   | 0   | 0   | 0   | 0   | 0   | 0   | 0   | 0   | 0   | 0   | 0   | 0   | 0   | 0   | 0   |
| Peptoniphilus harei/phoceensis             | 0   | 0   | 0   | 0   | 0   | 0   | 0   | 0   | 0   | 0   | 0   | 0   | 0   | 0   | 0   | 0   | 0   | 0   | 0   | 0   | 0   | 0   |
| Corynebacterium atypicum                   | 0   | 0   | 0   | 0   | 0   | 0   | 0   | 0   | 0   | 0   | 0   | 0   | 0   | 0   | 0   | 78  | 0   | 0   | 0   | 0   | 0   | 0   |
| Atopobium minutum                          | 0   | 0   | 0   | 0   | 0   | 0   | 0   | 0   | 0   | 0   | 0   | 0   | 0   | 0   | 0   | 0   | 0   | 0   | 0   | 0   | 0   | 0   |
| Corynebacterium genitalium                 | 0   | 0   | 0   | 0   | 0   | 0   | 0   | 0   | 0   | 0   | 0   | 0   | 0   | 0   | 0   | 61  | 0   | 0   | 0   | 0   | 0   | 0   |
| Bifidobacterium tsurumiense                | 0   | 0   | 0   | 0   | 0   | 0   | 0   | 0   | 0   | 0   | 0   | 0   | 0   | 0   | 0   | 0   | 0   | 0   | 0   | 0   | 0   | 0   |
| Micrococcus                                | 0   | 0   | 0   | 0   | 0   | 0   | 0   | 0   | 0   | 0   | 0   | 0   | 0   | 0   | 0   | 0   | 0   | 0   | 0   | 0   | 0   | 0   |
| Megasphaera genomsp. type_1                | 0   | 0   | 0   | 0   | 0   | 0   | 0   | 0   | 0   | 0   | 0   | 0   | 0   | 0   | 0   | 0   | 0   | 0   | 0   | 0   | 0   | 0   |
| Enhydrobacter                              | 0   | 0   | 0   | 0   | 0   | 0   | 0   | 0   | 0   | 0   | 0   | 0   | 0   | 0   | 0   | 0   | 0   | 0   | 0   | 0   | 0   | 0   |
| Fastidiosipila sanguinis                   | 0   | 0   | 0   | 0   | 0   | 29  | 0   | 150 | 0   | 0   | 0   | 0   | 0   | 0   | 0   | 0   | 0   | 0   | 0   | 0   | 0   | 0   |
| Prevotellamassilia                         | 0   | 0   | 0   | 0   | 0   | 0   | 0   | 0   | 0   | 0   | 0   | 0   | 0   | 0   | 0   | 0   | 0   | 0   | 0   | 0   | 0   | 0   |
| Peptostreptococcaceae                      | 0   | 0   | 0   | 0   | 0   | 0   | 0   | 0   | 0   | 0   | 0   | 0   | 0   | 0   | 0   | 0   | 0   | 0   | 0   | 0   | 0   | 0   |
| Morganella morganii                        | 0   | 0   | 0   | 0   | 0   | 0   | 0   | 0   | 0   | 0   | 0   | 0   | 0   | 0   | 0   | 0   | 0   | 0   | 0   | 0   | 0   | 0   |
| Neofamilia                                 | 0   | 0   | 0   | 0   | 0   | 0   | 0   | 0   | 0   | 0   | 0   | 0   | 0   | 0   | 0   | 0   | 0   | 0   | 0   | 0   | 0   | 0   |
| Pseudoclavibacter bifida                   | 40  | 0   | 0   | 0   | 0   | 0   | 0   | 0   | 0   | 0   | 0   | 0   | 0   | 0   | 0   | 0   | 0   | 0   | 0   | 0   | 0   | 0   |
| Helcococcus                                | 0   | 0   | 0   | 0   | 0   | 0   | 0   | 0   | 0   | 0   | 0   | 0   | 0   | 0   | 0   | 0   | 0   | 0   | 0   | 0   | 0   | 0   |
| Brevibacterium ravenpurgense               | 0   | 0   | 0   | 0   | 0   | 0   | 0   | 0   | 0   | 0   | 0   | 0   | 0   | 0   | 0   | 0   | 0   | 0   | 0   | 0   | 0   | 0   |
| Moryella indoligenes                       | 0   | 0   | 0   | 0   | 0   | 0   | 0   | 0   | 0   | 0   | 0   | 0   | 0   | 0   | 0   | 0   | 0   | 0   | 0   | 0   | 0   | 0   |
| Olegusella massiliensis                    | 0   | 0   | 0   | 0   | 0   | 0   | 0   | 0   | 0   | 0   | 0   | 0   | 0   | 0   | 0   | 0   | 0   | 0   | 0   | 0   | 0   | 0   |
| Morococcus cerebrosus                      | 0   | 0   | 0   | 0   | 0   | 0   | 0   | 0   | 0   | 0   | 0   | 0   | 0   | 0   | 0   | 0   | 0   | 0   | 0   | 0   | 0   | 0   |
| Prevotella scopos                          | 0   | 0   | 0   | 0   | 0   | 0   | 0   | 0   | 0   | 0   | 0   | 0   | 0   | 0   | 0   | 0   | 0   | 0   | 0   | 0   | 0   | 0   |
| Veillonella parvula/tobetsuensis           | 0   | 0   | 0   | 0   | 0   | 0   | 0   | 0   | 0   | 0   | 0   | 0   | 0   | 0   | 0   | 0   | 0   | 0   | 0   | 0   | 0   | 0   |
| Moryella                                   | 0   | 0   | 0   | 0   | 0   | 0   | 0   | 0   | 0   | 0   | 0   | 0   | 0   | 0   | 0   | 0   | 0   | 0   | 0   | 0   | 0   | 0   |
| Atopobium parvulum                         | 0   | 0   | 0   | 0   | 0   | 0   | 0   | 0   | 0   | 0   | 0   | 0   | 0   | 0   | 0   | 0   | 0   | 0   | 0   | 0   | 0   | 0   |
| Serratia marcescens                        | 0   | 0   | 0   | 0   | 0   | 0   | 0   | 0   | 0   | 0   | 0   | 0   | 0   | 0   | 0   | 0   | 0   | 0   | 0   | 0   | 0   | 0   |
| Collinsella aerofaciens                    | 0   | 0   | 0   | 0   | 0   | 0   | 0   | 0   | 0   | 0   | 0   | 0   | 0   | 0   | 0   | 0   | 0   | 0   | 0   | 0   | 0   | 0   |
| Curvibacter                                | 0   | 0   | 0   | 0   | 0   | 0   | 0   | 0   | 0   | 0   | 0   | 0   | 0   | 0   | 0   | 0   | 0   | 0   | 0   | 0   | 0   | 0   |
| Rothia dentocariosa                        | 0   | 0   | 0   | 0   | 0   | 0   | 0   | 0   | 0   | 0   | 0   | 0   | 0   | 0   | 0   | 0   | 0   | 0   | 0   | 0   | 0   | 0   |
| Prevotella bergensis                       | 0   | 0   | 0   | 0   | 0   | 0   | 0   | 0   | 0   | 0   | 0   | 0   | 0   | 0   | 0   | 0   | 0   | 0   | 0   | 0   | 0   | 0   |
| Corynebacterium sundsvallense              | 0   | 0   | 0   | 0   | 0   | 0   | 0   | 0   | 0   | 0   | 0   | 0   | 0   | 0   | 0   | 0   | 0   | 0   | 0   | 0   | 0   | 0   |



Samples S27 - S55

| Species                                       | S27 | S28 | S30 | S31 | S32 | S34 | S35 | S36 | S39 | S40 | S41 | S43 | S44 | S45 | S47 | S48 | S50 | S51 | S52 | S53 | S54 | S55 |
|-----------------------------------------------|-----|-----|-----|-----|-----|-----|-----|-----|-----|-----|-----|-----|-----|-----|-----|-----|-----|-----|-----|-----|-----|-----|
| Coriobacteria                                 | 0   | 0   | 0   | 0   | 0   | 0   | 0   | 0   | 0   | 0   | 0   | 0   | 0   | 0   | 0   | 0   | 0   | 0   | 0   | 0   | 0   | 0   |
| Neisseria meningitidis                        | 0   | 0   | 0   | 0   | 0   | 0   | 0   | 0   | 0   | 0   | 0   | 0   | 0   | 0   | 0   | 0   | 33  | 0   | 0   | 0   | 0   | 0   |
| Dermacoccus nishinomiyaensis                  | 0   | 0   | 0   | 0   | 0   | 0   | 0   | 0   | 0   | 0   | 0   | 0   | 0   | 0   | 0   | 0   | 0   | 0   | 0   | 0   | 0   | 0   |
| Leptotrichia                                  | 0   | 0   | 0   | 0   | 0   | 0   | 0   | 0   | 0   | 0   | 0   | 0   | 0   | 0   | 0   | 0   | 0   | 0   | 0   | 0   | 0   | 0   |
| Microbacteriaceae                             | 0   | 0   | 0   | 0   | 0   | 0   | 0   | 0   | 0   | 0   | 0   | 0   | 0   | 0   | 0   | 0   | 0   | 0   | 0   | 0   | 0   | 0   |
| Klebsiella pneumoniae/variiicola              | 0   | 0   | 0   | 0   | 0   | 0   | 0   | 0   | 0   | 0   | 0   | 0   | 0   | 0   | 0   | 0   | 0   | 0   | 0   | 0   | 0   | 0   |
| Hafnia alvei                                  | 0   | 0   | 0   | 0   | 0   | 0   | 0   | 0   | 0   | 0   | 0   | 0   | 0   | 0   | 0   | 0   | 0   | 0   | 0   | 0   | 0   | 0   |
| Caulobacter                                   | 0   | 0   | 0   | 0   | 0   | 0   | 0   | 0   | 0   | 0   | 0   | 0   | 0   | 0   | 0   | 0   | 0   | 0   | 0   | 0   | 0   | 0   |
| Lactobacillus reuteri                         | 0   | 0   | 0   | 0   | 0   | 0   | 0   | 0   | 0   | 0   | 0   | 0   | 0   | 0   | 0   | 0   | 0   | 0   | 0   | 0   | 0   | 0   |
| Gemella morbillorum                           | 0   | 0   | 0   | 0   | 0   | 0   | 0   | 0   | 0   | 0   | 0   | 0   | 0   | 0   | 0   | 0   | 0   | 0   | 0   | 0   | 0   | 0   |
| Rothia                                        | 0   | 0   | 0   | 0   | 0   | 0   | 0   | 0   | 0   | 0   | 0   | 0   | 0   | 0   | 0   | 0   | 0   | 0   | 0   | 0   | 0   | 0   |
| Campylobacter                                 | 0   | 0   | 0   | 0   | 0   | 0   | 0   | 0   | 0   | 0   | 0   | 0   | 0   | 0   | 0   | 0   | 0   | 0   | 0   | 0   | 0   | 0   |
| Prevotella genogroup 3                        | 0   | 0   | 0   | 0   | 0   | 0   | 0   | 0   | 0   | 0   | 0   | 0   | 0   | 0   | 0   | 0   | 0   | 0   | 0   | 0   | 0   | 0   |
| Staphylococcus warneri                        | 0   | 0   | 0   | 0   | 0   | 0   | 0   | 0   | 0   | 0   | 0   | 0   | 0   | 0   | 0   | 0   | 0   | 0   | 0   | 0   | 0   | 0   |
| Blautia wexlerae                              | 0   | 0   | 0   | 0   | 0   | 0   | 0   | 0   | 0   | 0   | 0   | 0   | 0   | 0   | 0   | 0   | 0   | 0   | 0   | 0   | 0   | 0   |
| Lachnoanaerobaculum                           | 0   | 0   | 0   | 0   | 0   | 0   | 0   | 0   | 0   | 0   | 0   | 0   | 0   | 0   | 0   | 0   | 0   | 0   | 0   | 0   | 0   | 0   |
| Anaerococcus hydrogenalis/senegalensis        | 0   | 0   | 0   | 0   | 0   | 0   | 0   | 0   | 0   | 0   | 0   | 0   | 0   | 0   | 0   | 0   | 0   | 0   | 0   | 0   | 0   | 0   |
| Brevibacterium mcbrellneri                    | 0   | 0   | 0   | 0   | 0   | 0   | 0   | 0   | 0   | 0   | 0   | 0   | 0   | 0   | 0   | 0   | 0   | 0   | 0   | 0   | 0   | 0   |
| Corynebacterium glaucum                       | 0   | 0   | 0   | 0   | 0   | 0   | 0   | 0   | 0   | 0   | 0   | 0   | 0   | 0   | 31  | 0   | 0   | 0   | 0   | 0   | 0   | 0   |
| Prevotella salivae                            | 0   | 0   | 0   | 0   | 0   | 0   | 0   | 0   | 0   | 0   | 0   | 0   | 0   | 0   | 0   | 0   | 0   | 0   | 0   | 0   | 0   | 0   |
| Coriobacteriaceae                             | 0   | 0   | 0   | 0   | 0   | 0   | 0   | 0   | 0   | 0   | 0   | 0   | 0   | 0   | 0   | 0   | 0   | 0   | 0   | 0   | 0   | 0   |
| Bulleidia                                     | 0   | 0   | 0   | 0   | 0   | 0   | 0   | 0   | 0   | 0   | 0   | 0   | 0   | 0   | 0   | 0   | 0   | 0   | 0   | 0   | 0   | 0   |
| Peptococcus                                   | 0   | 0   | 0   | 0   | 0   | 0   | 0   | 0   | 0   | 0   | 0   | 0   | 0   | 0   | 0   | 0   | 0   | 0   | 0   | 0   | 0   | 0   |
| Serratia marcescens/nematodiphila             | 0   | 0   | 0   | 0   | 0   | 0   | 0   | 0   | 0   | 0   | 0   | 0   | 0   | 0   | 0   | 0   | 0   | 0   | 0   | 0   | 0   | 0   |
| Leptotrichia wadei                            | 0   | 0   | 0   | 0   | 0   | 0   | 0   | 0   | 0   | 0   | 0   | 0   | 0   | 0   | 0   | 0   | 0   | 0   | 0   | 0   | 0   | 0   |
| Neisseriaceae                                 | 0   | 0   | 0   | 0   | 0   | 0   | 0   | 0   | 0   | 0   | 0   | 0   | 0   | 0   | 0   | 0   | 0   | 0   | 0   | 0   | 0   | 0   |
| Aerococcus sanguinicola                       | 0   | 0   | 0   | 0   | 0   | 0   | 0   | 0   | 0   | 0   | 0   | 0   | 0   | 0   | 0   | 0   | 0   | 0   | 0   | 0   | 0   | 0   |
| Criobacterium bergeronii                      | 0   | 0   | 0   | 0   | 0   | 0   | 0   | 0   | 0   | 0   | 0   | 0   | 0   | 0   | 0   | 0   | 0   | 0   | 0   | 0   | 0   | 0   |
| Brevibacterium luteolum                       | 0   | 0   | 0   | 0   | 0   | 0   | 0   | 0   | 0   | 0   | 0   | 0   | 0   | 0   | 0   | 0   | 0   | 0   | 0   | 0   | 0   | 0   |
| Klebsiella pneumoniae                         | 0   | 0   | 0   | 0   | 0   | 0   | 0   | 0   | 0   | 0   | 0   | 0   | 0   | 0   | 0   | 0   | 0   | 0   | 0   | 0   | 0   | 0   |
| Actinomyces oris/viscosus                     | 0   | 0   | 0   | 0   | 0   | 0   | 0   | 0   | 0   | 0   | 0   | 0   | 0   | 0   | 0   | 0   | 0   | 0   | 0   | 0   | 0   | 0   |
| Mycobacterium chelonae complex                | 0   | 0   | 0   | 0   | 0   | 0   | 0   | 0   | 0   | 0   | 0   | 0   | 0   | 0   | 0   | 0   | 0   | 0   | 0   | 0   | 0   | 0   |
| Corynebacterium jeddahense                    | 0   | 0   | 0   | 0   | 0   | 0   | 0   | 0   | 0   | 0   | 0   | 0   | 0   | 0   | 0   | 0   | 0   | 0   | 0   | 0   | 0   | 0   |
| Peptostreptococcus stomatis                   | 0   | 0   | 0   | 0   | 0   | 0   | 0   | 0   | 0   | 0   | 0   | 0   | 0   | 0   | 0   | 0   | 0   | 0   | 0   | 0   | 0   | 0   |
| Megasphaera                                   | 0   | 0   | 0   | 0   | 0   | 0   | 0   | 0   | 0   | 0   | 0   | 0   | 0   | 0   | 0   | 0   | 0   | 0   | 0   | 0   | 0   | 0   |
| Campylobacter rectus/showae                   | 0   | 0   | 0   | 0   | 0   | 0   | 0   | 0   | 0   | 0   | 0   | 0   | 0   | 0   | 0   | 0   | 0   | 0   | 0   | 0   | 0   | 0   |
| Staphylococcus carnosus/condimenti            | 0   | 0   | 0   | 0   | 0   | 0   | 0   | 0   | 0   | 0   | 0   | 0   | 0   | 0   | 0   | 0   | 0   | 0   | 0   | 0   | 0   | 0   |
| Prevotella pallens                            | 0   | 0   | 0   | 0   | 0   | 0   | 0   | 0   | 0   | 0   | 0   | 0   | 0   | 0   | 0   | 0   | 0   | 0   | 0   | 0   | 0   | 0   |
| Prolinoborus fasciculus/Acinetobacter lwoffii | 0   | 0   | 0   | 0   | 0   | 0   | 0   | 0   | 0   | 0   | 0   | 0   | 0   | 0   | 0   | 0   | 0   | 0   | 0   | 0   | 0   | 0   |
| Staphylococcus nepalensis                     | 0   | 0   | 0   | 0   | 0   | 0   | 0   | 0   | 0   | 0   | 0   | 0   | 0   | 0   | 0   | 0   | 0   | 0   | 0   | 0   | 0   | 0   |
| Staphylococcaceae                             | 0   | 0   | 0   | 0   | 0   | 0   | 0   | 0   | 0   | 0   | 0   | 0   | 0   | 0   | 0   | 0   | 0   | 0   | 0   | 0   | 0   | 0   |
| Cruoricaptor                                  | 0   | 0   | 0   | 0   | 0   | 0   | 0   | 0   | 0   | 0   | 0   | 0   | 0   | 0   | 0   | 0   | 0   | 0   | 0   | 0   | 0   | 0   |
| [Eubacterium] hallii                          | 0   | 0   | 0   | 0   | 0   | 0   | 0   | 0   | 0   | 0   | 0   | 0   | 0   | 0   | 0   | 0   | 0   | 0   | 0   | 0   | 0   | 0   |
| BVAB1 (species)                               | 0   | 0   | 0   | 0   | 0   | 0   | 0   | 0   | 0   | 0   | 0   | 0   | 0   | 0   | 0   | 0   | 0   | 0   | 0   | 0   | 0   | 0   |
| Stomatobaculum                                | 0   | 0   | 0   | 0   | 0   | 0   | 0   | 0   | 0   | 0   | 0   | 0   | 0   | 0   | 0   | 0   | 0   | 0   | 0   | 0   | 0   | 0   |
| Mycoplasma                                    | 0   | 0   | 0   | 0   | 0   | 0   | 0   | 0   | 0   | 0   | 0   | 0   | 0   | 0   | 0   | 0   | 0   | 0   | 0   | 0   | 0   | 0   |
| Catenibacterium mitsuokai                     | 0   | 0   | 0   | 0   | 0   | 0   | 0   | 0   | 0   | 0   | 0   | 0   | 0   | 0   | 0   | 0   | 0   | 0   | 0   | 0   | 0   | 0   |
| Veillonella parvula                           | 0   | 0   | 0   | 0   | 0   | 0   | 0   | 0   | 0   | 0   | 0   | 0   | 0   | 0   | 0   | 0   | 0   | 0   | 0   | 0   | 0   | 0   |
| Corynebacterium kroppenstedtii                | 0   | 0   | 0   | 0   | 0   | 0   | 0   | 0   | 0   | 0   | 0   | 0   | 0   | 0   | 0   | 0   | 0   | 0   | 0   | 0   | 0   | 0   |
| Eremococcus coleocola                         | 0   | 0   | 0   | 0   | 0   | 0   | 0   | 0   | 0   | 0   | 0   | 0   | 0   | 0   | 0   | 0   | 0   | 0   | 0   | 0   | 0   | 0   |
| Actinomyces europaeus                         | 0   | 0   | 0   | 0   | 0   | 0   | 0   | 0   | 0   | 0   | 0   | 0   | 0   | 0   | 0   | 0   | 0   | 0   | 0   | 0   | 0   | 0   |
| Peptoniphilus senegalensis                    | 0   | 0   | 0   | 0   | 0   | 0   | 0   | 0   | 0   | 0   | 0   | 0   | 0   | 0   | 0   | 0   | 0   | 0   | 0   | 0   | 0   | 0   |
| Corynebacterium afermentans/humii             | 0   | 0   | 0   | 0   | 0   | 0   | 0   | 0   | 0   | 0   | 0   | 0   | 0   | 0   | 0   | 0   | 0   | 0   | 0   | 0   | 0   | 0   |
| Acinetobacter                                 | 0   | 0   | 0   | 0   | 0   | 0   | 0   | 0   | 0   | 0   | 0   | 0   | 0   | 0   | 0   | 0   | 0   | 0   | 0   | 0   | 0   | 0   |
| Eggerthellaceae                               | 0   | 0   | 0   | 0   | 0   | 0   | 0   | 0   | 0   | 0   | 0   | 0   | 0   | 0   | 0   | 0   | 0   | 0   | 0   | 0   | 0   | 0   |
| Corynebacterium mucifaciens                   | 0   | 0   | 0   | 0   | 0   | 0   | 0   | 0   | 0   | 0   | 0   | 0   | 0   | 0   | 0   | 0   | 0   | 0   | 0   | 0   | 0   | 0   |
| Filifactor                                    | 0   | 0   | 0   | 0   | 0   | 0   | 0   | 0   | 0   | 0   | 0   | 0   | 0   | 0   | 0   | 0   | 0   | 0   | 0   | 0   | 0   | 0   |
| Ruminococcus faecis                           | 0   | 0   | 0   | 0   | 0   | 0   | 0   | 0   | 0   | 0   | 0   | 0   | 0   | 0   | 0   | 0   | 0   | 0   | 0   | 0   | 0   | 0   |
| Lactobacillus                                 | 0   | 0   | 0   | 0   | 0   | 0   | 0   | 0   | 0   | 0   | 0   | 0   | 0   | 0   | 0   | 0   | 0   | 0   | 0   | 0   | 0   | 0   |
| Peptoniphilus grossensis/rhinitidis           | 0   | 0   | 0   | 0   | 0   | 0   | 0   | 0   | 0   | 0   | 0   | 0   | 0   | 0   | 0   | 0   | 0   | 0   | 0   | 0   | 0   | 0   |
| Aerococcus urinaequi/viridans                 | 0   | 0   | 0   | 0   | 0   | 0   | 0   | 0   | 0   | 0   | 0   | 0   | 0   | 0   | 0   | 0   | 0   | 0   | 0   | 0   | 0   | 0   |
| Anaerostipes hadrus                           | 0   | 0   | 0   | 0   | 0   | 0   | 0   | 0   | 0   | 0   | 0   | 0   | 0   | 0   | 0   | 0   | 0   | 0   | 0   | 0   | 0   | 0   |
| Lagierella                                    | 0   | 0   | 0   | 0   | 0   | 0   | 0   | 0   | 0   | 0   | 0   | 0   | 0   | 0   | 0   | 0   | 0   | 0   | 0   | 0   | 0   | 0   |
| Neisseria cinerea/meningitidis                | 0   | 0   | 0   | 0   | 0   | 0   | 0   | 0   | 0   | 0   | 0   | 0   | 0   | 0   | 0   | 0   | 0   | 0   | 0   | 0   | 0   | 0   |
| Micrococcus lylae                             | 0   | 0   | 0   | 0   | 0   | 0   | 0   | 0   | 0   | 0   | 0   | 0   | 0   | 0   | 0   | 0   | 0   | 0   | 0   | 0   | 0   | 0   |
| Staphylococcus cohnii                         | 0   | 0   | 0   | 0   | 0   | 0   | 0   | 0   | 0   | 0   | 0   | 0   | 0   | 0   | 0   | 0   | 0   | 0   | 0   | 0   | 0   | 0   |
| Casaltella massiliensis                       | 0   | 0   | 0   | 0   | 0   | 0   | 0   | 0   | 0   | 0   | 0   | 0   | 0   | 0   | 0   | 0   | 0   | 0   | 0   | 0   | 0   | 0   |
| Stomatobaculum longum                         | 0   | 0   | 0   | 0   | 0   | 0   | 0   | 0   | 0   | 0   | 0   | 0   | 0   | 0   | 0   | 0   | 0   | 0   | 0   | 0   | 0   | 0   |
| Lautropia                                     | 0   | 0   | 0   | 0   | 0   | 0   | 0   | 0   | 0   | 0   | 0   | 0   | 0   | 0   | 0   | 0   | 0   | 0   | 0   | 0   | 0   | 0   |
| Fastidiosipila                                | 0   | 0   | 0   | 0   | 0   | 0   | 0   | 0   | 0   | 0   | 0   | 0   | 0   | 0   | 0   | 0   | 0   | 0   | 0   | 0   | 0   | 0   |

Samples S27 - S55

| Species                                      | S27 | S28 | S30 | S31 | S32 | S34 | S35 | S36 | S39 | S40 | S41 | S43 | S44 | S45 | S47 | S48 | S50 | S51 | S52 | S53 | S54 | S55 |
|----------------------------------------------|-----|-----|-----|-----|-----|-----|-----|-----|-----|-----|-----|-----|-----|-----|-----|-----|-----|-----|-----|-----|-----|-----|
| Corynebacterium durum                        | 0   | 0   | 0   | 0   | 0   | 0   | 0   | 0   | 0   | 0   | 0   | 0   | 0   | 0   | 0   | 0   | 0   | 0   | 0   | 0   | 0   | 0   |
| Actinomyces graevenitzi                      | 0   | 0   | 0   | 0   | 0   | 0   | 0   | 0   | 0   | 0   | 0   | 0   | 0   | 0   | 0   | 0   | 0   | 0   | 0   | 0   | 0   | 0   |
| Staphylococcus cohnii/saprophyticus          | 0   | 0   | 0   | 0   | 0   | 0   | 0   | 0   | 0   | 0   | 0   | 0   | 0   | 0   | 0   | 0   | 0   | 0   | 0   | 0   | 0   | 0   |
| Leptotrichia trevisanii                      | 0   | 0   | 0   | 0   | 0   | 0   | 0   | 0   | 0   | 0   | 0   | 0   | 0   | 0   | 0   | 0   | 0   | 0   | 0   | 0   | 0   | 0   |
| Candidatus Paraburkholderia calva            | 0   | 0   | 0   | 0   | 0   | 0   | 0   | 0   | 0   | 0   | 0   | 0   | 0   | 0   | 0   | 0   | 0   | 0   | 0   | 0   | 0   | 0   |
| Actinomyces urogenitalis                     | 0   | 0   | 0   | 0   | 0   | 0   | 0   | 0   | 0   | 0   | 0   | 0   | 0   | 0   | 0   | 0   | 0   | 0   | 0   | 0   | 0   | 0   |
| Clostridiales                                | 0   | 0   | 0   | 0   | 0   | 0   | 0   | 0   | 0   | 0   | 0   | 0   | 0   | 0   | 0   | 0   | 0   | 0   | 0   | 0   | 0   | 0   |
| Pasteurella caballi                          | 0   | 0   | 0   | 0   | 0   | 0   | 0   | 0   | 0   | 0   | 0   | 0   | 0   | 0   | 0   | 0   | 0   | 0   | 0   | 0   | 0   | 0   |
| Fusobacterium hwasookii/nucleatum            | 0   | 0   | 0   | 0   | 0   | 0   | 0   | 0   | 0   | 0   | 0   | 0   | 0   | 0   | 0   | 0   | 0   | 0   | 0   | 0   | 0   | 0   |
| Corynebacterium riegelii                     | 0   | 0   | 0   | 0   | 0   | 0   | 0   | 0   | 0   | 0   | 0   | 0   | 0   | 0   | 0   | 0   | 0   | 0   | 0   | 0   | 0   | 0   |
| Hafnia                                       | 0   | 0   | 0   | 0   | 0   | 0   | 0   | 0   | 0   | 0   | 0   | 0   | 0   | 0   | 0   | 0   | 0   | 0   | 0   | 0   | 0   | 0   |
| Staphylococcus equorum/saprophyticus/xylosum | 0   | 0   | 0   | 0   | 0   | 0   | 0   | 0   | 0   | 0   | 0   | 0   | 0   | 0   | 0   | 0   | 0   | 0   | 0   | 0   | 0   | 0   |
| Acinetobacter lwoffii                        | 0   | 0   | 0   | 0   | 0   | 0   | 0   | 0   | 0   | 0   | 0   | 0   | 0   | 0   | 0   | 0   | 0   | 0   | 0   | 0   | 0   | 0   |
| Micrococcus cohnii                           | 0   | 0   | 0   | 0   | 0   | 0   | 0   | 0   | 0   | 0   | 0   | 0   | 0   | 0   | 0   | 0   | 0   | 0   | 0   | 0   | 0   | 0   |
| Pseudoclavibacter faecalis                   | 0   | 0   | 0   | 0   | 0   | 0   | 0   | 0   | 0   | 0   | 0   | 0   | 0   | 0   | 0   | 0   | 0   | 0   | 0   | 0   | 0   | 0   |
| Leptotrichia buccalis                        | 0   | 0   | 0   | 0   | 0   | 0   | 0   | 0   | 0   | 0   | 0   | 0   | 0   | 0   | 0   | 0   | 0   | 0   | 0   | 0   | 0   | 0   |
| Actinomyces                                  | 0   | 0   | 0   | 0   | 0   | 0   | 0   | 0   | 0   | 0   | 0   | 0   | 0   | 0   | 0   | 0   | 0   | 0   | 0   | 0   | 0   | 0   |
| Fusobacterium nucleatum/periodonticum        | 0   | 0   | 0   | 0   | 0   | 0   | 0   | 0   | 0   | 0   | 0   | 0   | 0   | 0   | 0   | 0   | 0   | 0   | 0   | 0   | 0   | 0   |
| Lactobacillus saerimneri                     | 0   | 0   | 0   | 0   | 0   | 0   | 0   | 0   | 0   | 0   | 0   | 0   | 0   | 0   | 0   | 0   | 0   | 0   | 0   | 0   | 0   | 0   |
| Actinomycetaceae                             | 0   | 0   | 0   | 0   | 0   | 0   | 0   | 0   | 0   | 0   | 0   | 0   | 0   | 0   | 0   | 0   | 0   | 0   | 0   | 0   | 0   | 0   |
| Dialister                                    | 0   | 0   | 0   | 0   | 0   | 0   | 0   | 0   | 0   | 0   | 0   | 0   | 0   | 0   | 0   | 0   | 0   | 0   | 0   | 0   | 0   | 0   |
| Neisseria mucosa/subflava                    | 0   | 0   | 0   | 0   | 0   | 0   | 0   | 0   | 0   | 0   | 0   | 0   | 0   | 0   | 0   | 0   | 0   | 0   | 0   | 0   | 0   | 0   |
| Paracoccus                                   | 0   | 0   | 0   | 0   | 0   | 0   | 0   | 0   | 0   | 0   | 0   | 0   | 0   | 0   | 0   | 0   | 0   | 0   | 0   | 0   | 0   | 0   |
| Acinetobacter haemolyticus/johnsonii         | 0   | 0   | 0   | 0   | 0   | 0   | 0   | 0   | 0   | 0   | 0   | 0   | 0   | 0   | 0   | 0   | 0   | 0   | 0   | 0   | 0   | 0   |
| Neisseria subflava                           | 0   | 0   | 0   | 0   | 0   | 0   | 0   | 0   | 0   | 0   | 0   | 0   | 0   | 0   | 0   | 0   | 0   | 0   | 0   | 0   | 0   | 0   |
| Acinetobacter proteolyticus                  | 0   | 0   | 0   | 0   | 0   | 0   | 0   | 0   | 0   | 0   | 0   | 0   | 0   | 0   | 0   | 0   | 0   | 0   | 0   | 0   | 0   | 0   |
| Dorea formicigenerans                        | 0   | 0   | 0   | 0   | 0   | 0   | 0   | 0   | 0   | 0   | 0   | 0   | 0   | 0   | 0   | 0   | 0   | 0   | 0   | 0   | 0   | 0   |
| Corynebacterium tuscaniense                  | 0   | 0   | 0   | 0   | 0   | 0   | 0   | 0   | 0   | 0   | 0   | 0   | 0   | 0   | 0   | 0   | 0   | 0   | 0   | 0   | 0   | 0   |
| Massiliomicrobiota timonensis                | 0   | 0   | 0   | 0   | 0   | 0   | 0   | 0   | 0   | 0   | 0   | 0   | 0   | 0   | 0   | 0   | 0   | 0   | 0   | 0   | 0   | 0   |
| Fusobacterium hwasookii                      | 0   | 0   | 0   | 0   | 0   | 0   | 0   | 0   | 0   | 0   | 0   | 0   | 0   | 0   | 0   | 0   | 0   | 0   | 0   | 0   | 0   | 0   |
| Pseudoglutamicibacter albus                  | 0   | 0   | 0   | 0   | 0   | 0   | 0   | 0   | 0   | 0   | 0   | 0   | 0   | 0   | 0   | 0   | 0   | 0   | 0   | 0   | 0   | 0   |
| Clostridiales Family XIII. Incertae Sedis    | 0   | 0   | 0   | 0   | 0   | 0   | 0   | 0   | 0   | 0   | 0   | 0   | 0   | 0   | 0   | 0   | 0   | 0   | 0   | 0   | 0   | 0   |
| Kocuria marina/rhizophila                    | 0   | 0   | 0   | 0   | 0   | 0   | 0   | 0   | 0   | 0   | 0   | 0   | 0   | 0   | 0   | 0   | 0   | 0   | 0   | 0   | 0   | 0   |
| Kocuria                                      | 0   | 0   | 0   | 0   | 0   | 0   | 0   | 0   | 0   | 0   | 0   | 0   | 0   | 0   | 0   | 0   | 0   | 0   | 0   | 0   | 0   | 0   |
| Alloprevotella rava                          | 0   | 0   | 0   | 0   | 0   | 0   | 0   | 0   | 0   | 0   | 0   | 0   | 0   | 0   | 0   | 0   | 0   | 0   | 0   | 0   | 0   | 0   |
| Staphylococcus pettenkoferi                  | 0   | 0   | 0   | 0   | 0   | 0   | 0   | 0   | 0   | 0   | 0   | 0   | 0   | 0   | 0   | 0   | 0   | 0   | 0   | 0   | 0   | 0   |
| Streptococcus pseudoporcinus                 | 0   | 0   | 0   | 0   | 0   | 0   | 0   | 0   | 0   | 0   | 0   | 0   | 0   | 0   | 0   | 0   | 0   | 0   | 0   | 0   | 0   | 0   |
| Kingella                                     | 0   | 0   | 0   | 0   | 0   | 0   | 0   | 0   | 0   | 0   | 0   | 0   | 0   | 0   | 0   | 0   | 0   | 0   | 0   | 0   | 0   | 0   |
| Eikenella                                    | 0   | 0   | 0   | 0   | 0   | 0   | 0   | 0   | 0   | 0   | 0   | 0   | 0   | 0   | 0   | 0   | 0   | 0   | 0   | 0   | 0   | 0   |
| Actinomyces odontolyticus                    | 0   | 0   | 0   | 0   | 0   | 0   | 0   | 0   | 0   | 0   | 0   | 0   | 0   | 0   | 0   | 0   | 0   | 0   | 0   | 0   | 0   | 0   |
| Corynebacterium sphenisci                    | 0   | 0   | 0   | 0   | 0   | 0   | 0   | 0   | 0   | 0   | 0   | 0   | 0   | 0   | 0   | 0   | 0   | 0   | 0   | 0   | 0   | 0   |
| Cutibacterium                                | 0   | 0   | 0   | 0   | 0   | 0   | 0   | 0   | 0   | 0   | 0   | 0   | 0   | 0   | 0   | 0   | 0   | 0   | 0   | 0   | 0   | 0   |
| Staphylococcus xylosum                       | 0   | 0   | 0   | 0   | 0   | 0   | 0   | 0   | 0   | 0   | 0   | 0   | 0   | 0   | 0   | 0   | 0   | 0   | 0   | 0   | 0   | 0   |
| Burkholderiales                              | 0   | 0   | 0   | 0   | 0   | 0   | 0   | 0   | 0   | 0   | 0   | 0   | 0   | 0   | 0   | 0   | 0   | 0   | 0   | 0   | 0   | 0   |
| Massiliomicrobiota/Mycoplasma                | 0   | 0   | 0   | 0   | 0   | 0   | 0   | 0   | 0   | 0   | 0   | 0   | 0   | 0   | 0   | 0   | 0   | 0   | 0   | 0   | 0   | 0   |
| Bacteroidales                                | 0   | 0   | 0   | 0   | 0   | 0   | 0   | 0   | 0   | 0   | 0   | 0   | 0   | 0   | 0   | 0   | 0   | 0   | 0   | 0   | 0   | 0   |
| Campylobacter fetus                          | 0   | 0   | 0   | 0   | 0   | 0   | 0   | 0   | 0   | 0   | 0   | 0   | 0   | 0   | 0   | 0   | 0   | 0   | 0   | 0   | 0   | 0   |
| Prevotella aurantiaca                        | 0   | 0   | 0   | 0   | 0   | 0   | 0   | 0   | 0   | 0   | 0   | 0   | 0   | 0   | 0   | 0   | 0   | 0   | 0   | 0   | 0   | 0   |
| Corynebacterium freneyi/xerosis              | 0   | 0   | 0   | 0   | 0   | 0   | 0   | 0   | 0   | 0   | 0   | 0   | 0   | 0   | 0   | 0   | 0   | 0   | 0   | 0   | 0   | 0   |
| Aerococcaceae                                | 0   | 0   | 0   | 0   | 0   | 0   | 0   | 0   | 0   | 0   | 0   | 0   | 0   | 0   | 0   | 0   | 0   | 0   | 0   | 0   | 0   | 0   |
| Moraxella lacunata                           | 0   | 0   | 0   | 0   | 0   | 0   | 0   | 0   | 0   | 0   | 0   | 0   | 0   | 0   | 0   | 0   | 0   | 0   | 0   | 0   | 0   | 0   |
| Corynebacterium accolens/macginleyi          | 0   | 0   | 0   | 0   | 0   | 0   | 0   | 0   | 0   | 0   | 0   | 0   | 0   | 0   | 0   | 0   | 0   | 0   | 0   | 0   | 0   | 0   |
| Massilia aurea                               | 0   | 0   | 0   | 0   | 0   | 0   | 0   | 0   | 0   | 0   | 0   | 0   | 0   | 0   | 38  | 0   | 0   | 0   | 0   | 0   | 0   | 0   |
| Corynebacterium casei                        | 0   | 0   | 0   | 0   | 0   | 0   | 0   | 0   | 0   | 0   | 0   | 0   | 0   | 0   | 0   | 0   | 0   | 0   | 0   | 0   | 0   | 0   |
| Helcococcus sueciensis                       | 0   | 0   | 0   | 0   | 0   | 0   | 0   | 0   | 0   | 0   | 0   | 0   | 0   | 0   | 0   | 0   | 0   | 0   | 0   | 0   | 0   | 0   |
| Lactobacillus casei/rhannosus                | 0   | 0   | 0   | 0   | 0   | 0   | 0   | 0   | 0   | 0   | 0   | 0   | 0   | 0   | 0   | 0   | 0   | 0   | 0   | 0   | 0   | 0   |
| Holdemanella biformis                        | 0   | 0   | 0   | 0   | 0   | 0   | 0   | 0   | 0   | 0   | 0   | 0   | 0   | 0   | 0   | 0   | 0   | 0   | 0   | 0   | 0   | 0   |
| Pelistega                                    | 0   | 0   | 0   | 0   | 0   | 0   | 0   | 0   | 0   | 0   | 0   | 0   | 0   | 0   | 0   | 0   | 0   | 0   | 0   | 0   | 0   | 0   |
| Actinomyces massiliensis                     | 0   | 0   | 0   | 0   | 0   | 0   | 0   | 0   | 0   | 0   | 0   | 0   | 0   | 0   | 0   | 0   | 0   | 0   | 0   | 0   | 0   | 0   |
| Massilia                                     | 0   | 0   | 0   | 0   | 0   | 0   | 0   | 0   | 0   | 0   | 0   | 0   | 0   | 0   | 0   | 0   | 0   | 0   | 0   | 0   | 0   | 30  |
| Staphylococcus equorum/xylosum               | 0   | 0   | 0   | 0   | 0   | 0   | 0   | 0   | 0   | 0   | 0   | 0   | 0   | 0   | 0   | 0   | 0   | 0   | 0   | 0   | 0   | 0   |
| Streptococcus                                | 0   | 0   | 0   | 0   | 0   | 0   | 0   | 0   | 0   | 0   | 0   | 0   | 0   | 0   | 0   | 0   | 0   | 0   | 0   | 0   | 0   | 0   |
| Cutibacterium avidum                         | 0   | 0   | 0   | 0   | 0   | 0   | 0   | 0   | 0   | 0   | 0   | 0   | 0   | 0   | 0   | 0   | 0   | 0   | 0   | 0   | 0   | 0   |

# Samples S56 - S80

| Species                                             | S56  | S57  | S58  | S59   | S60   | S61   | S62  | S64   | S65  | S66   | S67   | S68   | S70   | S71   | S72   | S73   | S74   | S75   | S76   | S77   | S78   | S80   |
|-----------------------------------------------------|------|------|------|-------|-------|-------|------|-------|------|-------|-------|-------|-------|-------|-------|-------|-------|-------|-------|-------|-------|-------|
| Streptococcus mitis group                           | 3424 | 0    | 0    | 18319 | 24510 | 19732 | 76   | 1062  | 0    | 12785 | 0     | 29    | 27683 | 0     | 0     | 0     | 0     | 0     | 0     | 34071 | 25497 | 27686 |
| Lactobacillus iners                                 | 7923 | 0    | 0    | 0     | 0     | 0     | 1068 | 0     | 0    | 10897 | 35667 | 54915 | 0     | 69780 | 0     | 27629 | 32    | 0     | 0     | 0     | 0     | 0     |
| Gardnerella vaginalis                               | 3861 | 0    | 0    | 0     | 0     | 0     | 0    | 0     | 0    | 14061 | 17082 | 37749 | 7901  | 28437 | 0     | 15265 | 0     | 0     | 0     | 0     | 0     | 0     |
| Corynebacterium pseudogenitalium/tuberculoelasticum | 81   | 704  | 270  | 5768  | 3747  | 1310  | 0    | 446   | 4831 | 47    | 0     | 1381  | 109   | 35    | 7620  | 0     | 9205  | 52    | 1144  | 424   | 221   | 27    |
| Streptococcus agalactiae                            | 0    | 4693 | 1624 | 55    | 0     | 0     | 0    | 0     | 0    | 0     | 0     | 0     | 98    | 0     | 0     | 0     | 474   | 0     | 0     | 0     | 0     | 0     |
| Veillonella montpellierensis                        | 7963 | 0    | 0    | 0     | 0     | 0     | 0    | 17851 | 0    | 13139 | 0     | 0     | 12532 | 4898  | 0     | 16192 | 0     | 0     | 0     | 0     | 0     | 60207 |
| Streptococcus anginosus                             | 60   | 0    | 67   | 0     | 0     | 0     | 0    | 0     | 0    | 638   | 0     | 0     | 692   | 640   | 0     | 0     | 0     | 0     | 0     | 0     | 0     | 7247  |
| Chlamydia trachomatis                               | 0    | 0    | 0    | 0     | 0     | 0     | 0    | 0     | 0    | 0     | 0     | 0     | 0     | 0     | 10797 | 32    | 19739 | 32041 | 29688 | 29    | 0     | 0     |
| Haemophilus parainfluenzae                          | 0    | 0    | 0    | 0     | 0     | 0     | 0    | 0     | 0    | 811   | 0     | 0     | 0     | 0     | 0     | 0     | 0     | 0     | 0     | 0     | 0     | 0     |
| Finegoldia magna                                    | 0    | 0    | 78   | 338   | 159   | 0     | 0    | 6613  | 67   | 0     | 0     | 2001  | 0     | 133   | 0     | 0     | 71    | 0     | 40    | 0     | 2648  | 523   |
| Peptoniphilus asaccharolyticus/grossensis/harei     | 37   | 0    | 39   | 1618  | 37    | 0     | 0    | 1207  | 0    | 0     | 0     | 456   | 218   | 73    | 0     | 0     | 0     | 0     | 0     | 0     | 1851  | 1379  |
| Sneathia amnii                                      | 0    | 0    | 0    | 366   | 0     | 0     | 0    | 0     | 0    | 0     | 0     | 0     | 3738  | 26    | 0     | 1393  | 0     | 0     | 0     | 0     | 0     | 0     |
| Staphylococcus caprae/cohnii/epidermidis            | 0    | 178  | 114  | 573   | 1539  | 0     | 0    | 71    | 199  | 243   | 71    | 425   | 0     | 0     | 203   | 0     | 72    | 0     | 48    | 0     | 0     | 101   |
| Gemella haemolysans/taiwanensis                     | 0    | 0    | 0    | 0     | 0     | 79    | 0    | 0     | 0    | 167   | 0     | 0     | 0     | 0     | 0     | 0     | 0     | 0     | 0     | 0     | 0     | 58    |
| Sneathia sanguinigena                               | 0    | 0    | 0    | 1573  | 0     | 0     | 0    | 0     | 0    | 0     | 0     | 0     | 35384 | 7874  | 0     | 17135 | 0     | 0     | 0     | 0     | 0     | 0     |
| Mycoplasma genitalium                               | 0    | 7577 | 0    | 65    | 0     | 53    | 0    | 0     | 0    | 0     | 0     | 0     | 0     | 0     | 0     | 0     | 0     | 0     | 0     | 0     | 0     | 31    |
| Mycoplasma penetrans                                | 0    | 0    | 0    | 0     | 0     | 0     | 0    | 0     | 0    | 0     | 0     | 0     | 0     | 0     | 0     | 0     | 0     | 0     | 0     | 0     | 0     | 0     |
| Haemophilus haemolyticus/quentini                   | 0    | 0    | 0    | 0     | 0     | 127   | 0    | 0     | 0    | 554   | 0     | 0     | 0     | 0     | 0     | 0     | 0     | 0     | 0     | 0     | 0     | 396   |
| Corynebacterium pyruviciproducens                   | 0    | 0    | 934  | 0     | 28    | 0     | 0    | 0     | 0    | 0     | 0     | 1034  | 86    | 0     | 0     | 0     | 0     | 0     | 0     | 0     | 0     | 151   |
| Anaerococcus prevotii/tetradicus                    | 0    | 0    | 0    | 5321  | 64    | 0     | 0    | 0     | 0    | 0     | 0     | 88    | 228   | 118   | 0     | 0     | 0     | 0     | 0     | 0     | 432   | 991   |
| Haemophilus influenzae                              | 0    | 0    | 0    | 0     | 0     | 0     | 0    | 0     | 0    | 172   | 0     | 0     | 0     | 0     | 0     | 0     | 0     | 0     | 0     | 0     | 0     | 1717  |
| Staphylococcus epidermidis/hominis                  | 0    | 75   | 0    | 319   | 917   | 0     | 0    | 37    | 58   | 0     | 0     | 1043  | 26    | 0     | 355   | 0     | 106   | 0     | 0     | 101   | 0     | 0     |
| Atopobium vaginae                                   | 252  | 0    | 0    | 0     | 0     | 0     | 0    | 0     | 0    | 0     | 0     | 0     | 691   | 2146  | 0     | 373   | 0     | 0     | 0     | 0     | 0     | 0     |
| Ureaplasma parvum/urealyticum                       | 533  | 0    | 0    | 0     | 0     | 2911  | 0    | 0     | 0    | 0     | 1108  | 172   | 3087  | 475   | 2002  | 443   | 172   | 0     | 0     | 0     | 0     | 848   |
| Prevotella timonensis                               | 198  | 0    | 0    | 0     | 0     | 0     | 0    | 0     | 0    | 0     | 0     | 0     | 318   | 0     | 0     | 0     | 0     | 0     | 0     | 0     | 0     | 0     |
| Fenollaria massiliensis/timonensis                  | 0    | 0    | 0    | 0     | 0     | 0     | 0    | 0     | 0    | 0     | 0     | 0     | 0     | 0     | 0     | 0     | 0     | 0     | 0     | 0     | 0     | 0     |
| Anaerococcus                                        | 0    | 0    | 0    | 0     | 159   | 0     | 0    | 0     | 88   | 0     | 0     | 681   | 0     | 0     | 0     | 0     | 28    | 0     | 0     | 0     | 0     | 188   |
| Corynebacterium coyleae                             | 0    | 0    | 0    | 1040  | 417   | 27    | 0    | 0     | 33   | 0     | 0     | 0     | 0     | 0     | 973   | 0     | 0     | 0     | 0     | 0     | 309   | 0     |
| Prevotella bivia                                    | 0    | 0    | 375  | 0     | 0     | 0     | 0    | 326   | 0    | 0     | 0     | 0     | 633   | 0     | 0     | 0     | 0     | 0     | 0     | 0     | 0     | 2264  |
| Prevotella melaninogenica                           | 0    | 0    | 0    | 0     | 0     | 0     | 0    | 0     | 0    | 0     | 0     | 0     | 0     | 0     | 0     | 0     | 0     | 0     | 0     | 0     | 0     | 0     |
| Corynebacterium aurimucosum/minimum/singulare       | 0    | 53   | 0    | 875   | 1013  | 173   | 0    | 0     | 5538 | 0     | 0     | 77    | 0     | 0     | 2377  | 0     | 883   | 0     | 1047  | 1040  | 0     | 54    |
| Staphylococcus aureus                               | 0    | 0    | 0    | 0     | 0     | 0     | 0    | 0     | 0    | 0     | 0     | 0     | 0     | 0     | 0     | 0     | 0     | 0     | 0     | 0     | 0     | 0     |
| Anaerococcus lactolyticus                           | 0    | 0    | 0    | 278   | 0     | 0     | 0    | 0     | 0    | 0     | 0     | 0     | 431   | 0     | 0     | 0     | 0     | 0     | 0     | 0     | 0     | 2008  |
| Aerococcus christensenii                            | 301  | 0    | 0    | 0     | 0     | 0     | 0    | 0     | 0    | 0     | 0     | 0     | 733   | 1168  | 0     | 465   | 0     | 0     | 0     | 0     | 0     | 1550  |
| Corynebacterium glucuronolyticum                    | 0    | 0    | 0    | 0     | 44    | 0     | 0    | 0     | 0    | 0     | 0     | 0     | 0     | 0     | 0     | 0     | 0     | 0     | 0     | 0     | 222   | 0     |
| Veillonella atypica                                 | 0    | 0    | 0    | 0     | 0     | 0     | 0    | 0     | 0    | 0     | 0     | 0     | 0     | 0     | 0     | 0     | 0     | 0     | 0     | 0     | 34    | 0     |
| Veillonella                                         | 0    | 0    | 0    | 0     | 0     | 0     | 0    | 0     | 0    | 0     | 0     | 0     | 0     | 0     | 0     | 0     | 0     | 0     | 0     | 0     | 0     | 0     |
| Mycoplasma hominis                                  | 0    | 0    | 0    | 569   | 0     | 0     | 0    | 0     | 0    | 0     | 0     | 0     | 0     | 1079  | 0     | 0     | 0     | 0     | 0     | 0     | 0     | 1668  |
| Granulicatella elegans                              | 0    | 0    | 0    | 0     | 0     | 65    | 0    | 0     | 0    | 0     | 0     | 0     | 262   | 0     | 0     | 0     | 0     | 0     | 0     | 0     | 0     | 0     |
| Ezakiella                                           | 0    | 0    | 0    | 0     | 0     | 0     | 0    | 0     | 0    | 0     | 0     | 0     | 0     | 0     | 0     | 0     | 0     | 0     | 0     | 0     | 0     | 0     |
| Shigella/Escherichia                                | 0    | 0    | 0    | 0     | 0     | 0     | 0    | 0     | 0    | 0     | 0     | 0     | 0     | 0     | 0     | 0     | 0     | 0     | 0     | 0     | 0     | 0     |
| Streptococcus salivarius                            | 0    | 0    | 0    | 0     | 0     | 0     | 0    | 0     | 0    | 0     | 0     | 0     | 0     | 0     | 0     | 0     | 0     | 0     | 0     | 0     | 0     | 0     |
| Actinomyces turicensis                              | 0    | 0    | 0    | 0     | 0     | 0     | 0    | 0     | 0    | 0     | 0     | 0     | 205   | 0     | 0     | 0     | 0     | 0     | 0     | 0     | 0     | 89    |
| Prevotella corporis                                 | 0    | 0    | 0    | 0     | 0     | 0     | 0    | 0     | 0    | 0     | 0     | 0     | 0     | 0     | 0     | 0     | 0     | 0     | 0     | 0     | 0     | 0     |
| Corynebacterium simulans                            | 0    | 0    | 0    | 0     | 0     | 0     | 0    | 2841  | 0    | 0     | 0     | 0     | 0     | 0     | 0     | 0     | 0     | 0     | 0     | 0     | 0     | 0     |
| Fusobacterium equinum                               | 0    | 0    | 0    | 0     | 0     | 0     | 0    | 0     | 0    | 0     | 0     | 0     | 0     | 0     | 0     | 0     | 0     | 0     | 0     | 0     | 0     | 0     |
| Corynebacterium                                     | 0    | 0    | 0    | 507   | 0     | 64    | 0    | 0     | 123  | 0     | 0     | 0     | 0     | 393   | 0     | 0     | 201   | 0     | 0     | 0     | 0     | 0     |
| Staphylococcus haemolyticus                         | 0    | 114  | 0    | 0     | 0     | 0     | 0    | 137   | 0    | 32    | 0     | 0     | 140   | 0     | 0     | 0     | 0     | 48    | 0     | 0     | 373   | 0     |
| Gemella asaccharolytica                             | 508  | 0    | 0    | 0     | 0     | 0     | 0    | 0     | 0    | 0     | 0     | 0     | 162   | 975   | 0     | 284   | 0     | 0     | 0     | 0     | 0     | 0     |
| Peptoniphilus                                       | 0    | 0    | 0    | 43    | 0     | 0     | 0    | 0     | 0    | 0     | 0     | 0     | 0     | 0     | 0     | 0     | 0     | 0     | 0     | 0     | 0     | 0     |
| Corynebacterium hadale/imitans                      | 0    | 0    | 0    | 506   | 529   | 221   | 0    | 0     | 954  | 0     | 0     | 0     | 0     | 0     | 59    | 0     | 256   | 0     | 0     | 368   | 0     | 0     |
| Eggerthella sp. type 1 (species)                    | 78   | 0    | 0    | 0     | 0     | 0     | 0    | 0     | 0    | 0     | 0     | 0     | 149   | 659   | 0     | 959   | 0     | 0     | 0     | 0     | 0     | 0     |
| Prevotella disiens                                  | 111  | 0    | 0    | 0     | 0     | 0     | 0    | 0     | 0    | 0     | 0     | 0     | 0     | 0     | 0     | 0     | 0     | 0     | 0     | 0     | 0     | 0     |
| Peptoniphilus lacrimalis                            | 0    | 0    | 0    | 0     | 0     | 0     | 0    | 0     | 0    | 0     | 0     | 0     | 0     | 0     | 0     | 0     | 0     | 0     | 0     | 0     | 0     | 0     |
| Anaerococcus vaginalis                              | 0    | 0    | 0    | 288   | 0     | 0     | 0    | 0     | 0    | 0     | 0     | 0     | 0     | 0     | 0     | 0     | 0     | 0     | 0     | 0     | 0     | 0     |
| Facklamia hominis                                   | 0    | 0    | 0    | 0     | 0     | 0     | 0    | 0     | 0    | 0     | 0     | 95    | 0     | 0     | 0     | 0     | 0     | 0     | 0     | 0     | 204   | 25    |
| Prevotella amnii                                    | 2743 | 0    | 0    | 0     | 0     | 0     | 0    | 0     | 0    | 0     | 0     | 0     | 4042  | 5917  | 0     | 13883 | 0     | 0     | 0     | 0     | 0     | 0     |
| Campylobacter ureolyticus                           | 27   | 0    | 0    | 0     | 0     | 0     | 0    | 0     | 0    | 0     | 0     | 0     | 325   | 0     | 0     | 0     | 0     | 0     | 0     | 0     | 0     | 0     |
| BVAB2 (species)                                     | 0    | 0    | 0    | 0     | 0     | 0     | 0    | 0     | 0    | 0     | 0     | 0     | 0     | 0     | 0     | 0     | 0     | 0     | 0     | 0     | 0     | 0     |
| Haemophilus                                         | 0    | 0    | 0    | 0     | 0     | 0     | 0    | 0     | 0    | 0     | 0     | 0     | 0     | 0     | 0     | 0     | 0     | 0     | 0     | 0     | 0     | 0     |
| Anaerococcus hydrogenalis/rubeifantidis             | 0    | 0    | 131  | 0     | 461   | 0     | 0    | 960   | 0    | 0     | 0     | 249   | 0     | 92    | 0     | 0     | 0     | 0     | 0     | 0     | 0     | 596   |
| Anaerococcus mediterraneensis                       | 0    | 0    | 0    | 32    | 0     | 0     | 0    | 0     | 0    | 0     | 0     | 35    | 0     | 0     | 0     | 0     | 0     | 0     | 0     | 0     | 40    | 0     |
| Dialister sp. type 2                                | 47   | 0    | 0    | 0     | 0     | 0     | 0    | 0     | 0    | 0     | 0     | 0     | 0     | 0     | 0     | 0     | 0     | 0     | 0     | 0     | 0     | 0     |
| Dialister microaerophilus                           | 0    | 0    | 0    | 0     | 0     | 0     | 0    | 915   | 0    | 0     | 0     | 0     | 105   | 0     | 0     | 172   | 0     | 0     | 0     | 0     | 0     | 0     |
| Corynebacterium amycolatum                          | 0    | 0    | 0    | 28    | 0     | 0     | 0    | 0     | 108  | 0     | 0     | 0     | 0     | 0     | 0     | 0     | 0     | 0     | 0     | 0     | 0     | 0     |
| Ureaplasma                                          | 0    | 0    | 0    | 0     | 163   | 0     | 0    | 0     | 0    | 0     | 853   | 107   | 0     | 0     | 0     | 0     | 125   | 0     | 0     | 0     | 0     | 589   |
| Enterococcus faecalis                               | 0    | 0    | 0    | 0     | 0     | 0     | 0    | 324   | 0    | 0     | 0     | 0     | 0     | 0     | 0     | 0     | 0     | 0     | 0     | 0     | 242   | 0     |
| Parvimonas                                          | 0    | 0    | 0    | 1374  | 0     | 0     | 0    | 0     | 0    | 0     | 0     | 0     | 0     | 0     | 0     | 0     | 40    | 0     | 0     | 0     | 0     | 0     |
| Haemophilus pittmaniae                              | 0    | 0    | 0    | 0     | 0     | 0     | 0    | 0     | 0    | 2355  | 0     | 0     | 0     | 0     | 0     | 0     | 34    | 0     | 0     | 0     | 0     | 0     |
| Actinomyces neuii                                   | 0    | 0    | 65   | 0     | 0     | 0     | 0    | 239   | 0    | 0     | 0     | 85    | 0     | 0     | 0     | 0     | 0     | 0     | 0     | 0     | 80    | 0     |

Samples S56 - S80

| Species                                                | S56 | S57 | S58 | S59  | S60 | S61 | S62 | S64  | S65  | S66 | S67 | S68 | S70 | S71 | S72 | S73 | S74 | S75 | S76  | S77 | S78 | S80 |
|--------------------------------------------------------|-----|-----|-----|------|-----|-----|-----|------|------|-----|-----|-----|-----|-----|-----|-----|-----|-----|------|-----|-----|-----|
| Peptoniphilus rhintidis                                | 0   | 0   | 0   | 0    | 0   | 0   | 0   | 0    | 0    | 0   | 0   | 0   | 0   | 0   | 0   | 0   | 0   | 0   | 0    | 0   | 0   | 0   |
| Anaerococcus senegalensis                              | 0   | 0   | 0   | 52   | 0   | 0   | 0   | 1144 | 0    | 0   | 0   | 40  | 0   | 0   | 0   | 0   | 0   | 0   | 0    | 0   | 177 | 0   |
| Peptostreptococcus anaerobius                          | 0   | 0   | 0   | 0    | 0   | 0   | 0   | 0    | 0    | 0   | 0   | 0   | 0   | 0   | 0   | 31  | 0   | 0   | 0    | 0   | 0   | 0   |
| Dialister propionificaciens                            | 0   | 0   | 0   | 0    | 0   | 0   | 0   | 0    | 0    | 0   | 0   | 0   | 0   | 0   | 0   | 0   | 0   | 0   | 0    | 0   | 0   | 0   |
| Peptoniphilus harei                                    | 0   | 0   | 0   | 0    | 0   | 0   | 0   | 0    | 0    | 0   | 0   | 0   | 0   | 0   | 0   | 0   | 0   | 0   | 0    | 0   | 0   | 0   |
| Negativicoccus succinicivorans                         | 0   | 0   | 0   | 0    | 0   | 0   | 0   | 0    | 0    | 0   | 0   | 0   | 0   | 0   | 0   | 0   | 0   | 0   | 0    | 0   | 0   | 0   |
| Parvimonas micra                                       | 0   | 0   | 0   | 0    | 0   | 0   | 0   | 0    | 0    | 0   | 0   | 0   | 0   | 0   | 0   | 903 | 0   | 0   | 0    | 0   | 0   | 0   |
| Actinomyces ihumii                                     | 0   | 0   | 158 | 0    | 0   | 0   | 0   | 0    | 0    | 0   | 0   | 43  | 0   | 0   | 0   | 0   | 0   | 0   | 0    | 0   | 0   | 0   |
| Actinotignum timonense                                 | 34  | 0   | 0   | 0    | 0   | 0   | 0   | 0    | 0    | 0   | 0   | 125 | 0   | 0   | 0   | 0   | 0   | 0   | 0    | 0   | 0   | 0   |
| Fenollaria                                             | 0   | 0   | 0   | 0    | 0   | 0   | 0   | 0    | 0    | 0   | 0   | 0   | 0   | 0   | 0   | 0   | 0   | 0   | 0    | 0   | 0   | 0   |
| Fusobacterium massiliense                              | 0   | 0   | 0   | 0    | 0   | 0   | 0   | 0    | 0    | 0   | 0   | 0   | 0   | 0   | 0   | 0   | 0   | 0   | 0    | 0   | 0   | 0   |
| Actinobaculum massiliense                              | 0   | 0   | 0   | 0    | 0   | 0   | 0   | 0    | 0    | 0   | 0   | 0   | 0   | 0   | 0   | 0   | 0   | 0   | 0    | 0   | 0   | 0   |
| Peptoniphilus coxii                                    | 0   | 0   | 0   | 172  | 0   | 0   | 0   | 0    | 0    | 0   | 0   | 0   | 0   | 0   | 0   | 0   | 0   | 0   | 0    | 0   | 0   | 111 |
| Staphylococcus lugdunensis                             | 0   | 0   | 0   | 0    | 0   | 0   | 0   | 0    | 0    | 0   | 0   | 0   | 0   | 0   | 0   | 0   | 0   | 0   | 0    | 0   | 0   | 0   |
| Dermabacter                                            | 0   | 0   | 0   | 67   | 143 | 0   | 0   | 0    | 1366 | 0   | 0   | 0   | 0   | 0   | 0   | 99  | 0   | 128 | 89   | 29  | 0   | 0   |
| Alloscardovia omnicolens                               | 0   | 0   | 0   | 0    | 0   | 0   | 0   | 0    | 0    | 0   | 0   | 0   | 0   | 0   | 0   | 0   | 0   | 0   | 0    | 0   | 0   | 0   |
| Varibaculum cambriense                                 | 0   | 0   | 0   | 0    | 0   | 0   | 0   | 50   | 0    | 0   | 0   | 0   | 0   | 0   | 0   | 0   | 0   | 0   | 0    | 0   | 0   | 0   |
| Streptococcus urinialis                                | 0   | 0   | 0   | 0    | 0   | 0   | 0   | 0    | 0    | 0   | 0   | 0   | 0   | 0   | 0   | 0   | 0   | 0   | 0    | 0   | 0   | 0   |
| Corynebacterium appendicis                             | 0   | 0   | 0   | 0    | 157 | 0   | 0   | 0    | 2634 | 0   | 0   | 0   | 0   | 0   | 0   | 0   | 0   | 39  | 0    | 0   | 0   | 0   |
| Actinotignum schaalii                                  | 0   | 0   | 0   | 0    | 0   | 0   | 0   | 0    | 0    | 0   | 0   | 0   | 0   | 0   | 0   | 0   | 0   | 0   | 0    | 0   | 0   | 0   |
| Corynebacterium timonense                              | 0   | 0   | 0   | 124  | 0   | 0   | 0   | 0    | 0    | 0   | 0   | 0   | 0   | 0   | 0   | 0   | 0   | 0   | 0    | 0   | 0   | 377 |
| Gemella                                                | 0   | 0   | 0   | 0    | 0   | 0   | 0   | 0    | 0    | 0   | 0   | 0   | 0   | 0   | 0   | 0   | 0   | 0   | 0    | 0   | 0   | 0   |
| Klebsiella aerogenes/Enterobacter asburiae             | 0   | 0   | 0   | 0    | 0   | 0   | 0   | 0    | 0    | 0   | 0   | 0   | 0   | 0   | 0   | 0   | 0   | 0   | 0    | 0   | 0   | 0   |
| Fusobacterium periodonticum                            | 0   | 0   | 0   | 0    | 0   | 0   | 0   | 0    | 0    | 0   | 0   | 0   | 0   | 0   | 0   | 0   | 0   | 0   | 0    | 0   | 0   | 0   |
| Veillonella dispar                                     | 0   | 0   | 0   | 0    | 0   | 0   | 0   | 26   | 0    | 0   | 0   | 0   | 0   | 0   | 0   | 0   | 0   | 0   | 0    | 0   | 0   | 0   |
| Prevotella colorans                                    | 0   | 0   | 0   | 0    | 0   | 0   | 0   | 0    | 0    | 0   | 0   | 0   | 0   | 0   | 0   | 0   | 0   | 0   | 0    | 0   | 0   | 0   |
| Candidatus Peptoniphilus massiliensis                  | 0   | 0   | 0   | 0    | 0   | 0   | 0   | 0    | 0    | 0   | 0   | 0   | 0   | 0   | 0   | 0   | 0   | 0   | 0    | 0   | 0   | 0   |
| Eremococcus                                            | 0   | 0   | 0   | 371  | 115 | 0   | 0   | 0    | 404  | 0   | 0   | 0   | 0   | 0   | 0   | 86  | 0   | 47  | 48   | 0   | 0   | 0   |
| Varibaculum anthropi                                   | 0   | 0   | 0   | 0    | 0   | 0   | 0   | 0    | 0    | 0   | 0   | 0   | 0   | 0   | 0   | 0   | 0   | 0   | 0    | 0   | 0   | 0   |
| Propionimicrobium lymphophilum                         | 0   | 0   | 0   | 0    | 0   | 0   | 0   | 0    | 0    | 0   | 0   | 0   | 0   | 0   | 0   | 0   | 0   | 0   | 0    | 0   | 0   | 0   |
| Streptococcus dysgalactiae                             | 0   | 0   | 0   | 0    | 0   | 0   | 0   | 0    | 0    | 0   | 0   | 0   | 0   | 0   | 0   | 0   | 0   | 0   | 0    | 0   | 0   | 0   |
| Negativicoccus                                         | 0   | 0   | 0   | 0    | 0   | 0   | 0   | 0    | 0    | 0   | 0   | 0   | 0   | 0   | 0   | 0   | 0   | 0   | 0    | 0   | 0   | 0   |
| Porphyromonas somerae                                  | 0   | 0   | 0   | 0    | 0   | 0   | 0   | 0    | 0    | 0   | 0   | 0   | 0   | 0   | 0   | 0   | 0   | 0   | 0    | 0   | 0   | 0   |
| Corynebacterium jeikeium                               | 0   | 0   | 0   | 57   | 0   | 59  | 0   | 0    | 2842 | 0   | 0   | 0   | 0   | 0   | 0   | 0   | 0   | 395 | 1126 | 0   | 0   | 0   |
| Mobiluncus curtisii                                    | 0   | 0   | 0   | 0    | 0   | 0   | 0   | 0    | 0    | 0   | 0   | 0   | 0   | 0   | 0   | 0   | 0   | 0   | 0    | 0   | 0   | 0   |
| Porphyromonas uenonis                                  | 0   | 0   | 0   | 0    | 0   | 0   | 0   | 0    | 0    | 0   | 0   | 0   | 0   | 0   | 0   | 0   | 0   | 0   | 0    | 0   | 0   | 0   |
| Aerococcus urinae                                      | 0   | 0   | 0   | 0    | 0   | 0   | 0   | 0    | 0    | 0   | 0   | 37  | 0   | 0   | 0   | 0   | 0   | 0   | 0    | 0   | 0   | 0   |
| Corynebacterium mycetoides                             | 0   | 0   | 0   | 2118 | 0   | 0   | 0   | 0    | 0    | 0   | 0   | 0   | 0   | 0   | 0   | 0   | 0   | 0   | 0    | 0   | 0   | 469 |
| Cutibacterium acnes                                    | 0   | 0   | 0   | 0    | 0   | 0   | 0   | 0    | 0    | 0   | 0   | 0   | 0   | 0   | 0   | 0   | 0   | 0   | 0    | 0   | 0   | 0   |
| Urinacoccus massiliensis                               | 0   | 0   | 0   | 0    | 0   | 0   | 0   | 0    | 0    | 0   | 0   | 0   | 0   | 0   | 0   | 0   | 0   | 0   | 0    | 0   | 0   | 0   |
| Campylobacter hominis                                  | 0   | 0   | 0   | 0    | 0   | 0   | 0   | 0    | 0    | 0   | 0   | 0   | 0   | 0   | 0   | 0   | 0   | 0   | 0    | 0   | 0   | 0   |
| Staphylococcus capitis/caprae                          | 0   | 0   | 0   | 0    | 0   | 0   | 0   | 0    | 0    | 0   | 0   | 0   | 0   | 0   | 0   | 0   | 0   | 0   | 0    | 0   | 0   | 0   |
| Sneathia                                               | 0   | 0   | 0   | 0    | 0   | 0   | 0   | 0    | 0    | 0   | 0   | 0   | 0   | 0   | 0   | 0   | 0   | 0   | 0    | 0   | 0   | 0   |
| Prevotella jejuni                                      | 0   | 0   | 0   | 0    | 0   | 0   | 0   | 0    | 0    | 0   | 0   | 0   | 0   | 0   | 0   | 0   | 0   | 0   | 0    | 0   | 0   | 0   |
| Varibaculum                                            | 0   | 0   | 0   | 0    | 0   | 0   | 0   | 0    | 0    | 0   | 0   | 0   | 0   | 0   | 0   | 0   | 0   | 0   | 0    | 0   | 0   | 0   |
| Corynebacterium striatum                               | 0   | 0   | 0   | 0    | 0   | 0   | 0   | 0    | 0    | 0   | 0   | 0   | 0   | 0   | 0   | 0   | 0   | 0   | 0    | 0   | 0   | 0   |
| Jonquetella anthropi                                   | 0   | 0   | 0   | 0    | 0   | 0   | 0   | 0    | 0    | 0   | 0   | 0   | 0   | 0   | 0   | 0   | 0   | 0   | 0    | 0   | 0   | 0   |
| Peptoniphilus koenoenieniae                            | 0   | 0   | 0   | 0    | 0   | 0   | 0   | 0    | 0    | 0   | 0   | 0   | 0   | 0   | 0   | 0   | 0   | 0   | 0    | 0   | 0   | 0   |
| Bifidobacterium longum                                 | 0   | 0   | 0   | 0    | 0   | 0   | 0   | 0    | 0    | 0   | 0   | 0   | 0   | 0   | 0   | 0   | 0   | 0   | 0    | 0   | 0   | 0   |
| Helicobacter                                           | 0   | 0   | 0   | 0    | 0   | 0   | 0   | 0    | 0    | 0   | 0   | 0   | 0   | 0   | 0   | 0   | 0   | 0   | 0    | 0   | 0   | 0   |
| Lawsonella clevelandensis                              | 0   | 0   | 0   | 0    | 0   | 0   | 0   | 0    | 0    | 0   | 0   | 0   | 0   | 0   | 0   | 0   | 0   | 0   | 0    | 0   | 0   | 0   |
| Escherichia coli/fergusonii                            | 0   | 0   | 0   | 0    | 0   | 0   | 0   | 0    | 0    | 0   | 0   | 0   | 0   | 0   | 0   | 0   | 0   | 0   | 0    | 0   | 0   | 0   |
| Fusobacterium nucleatum                                | 0   | 0   | 0   | 0    | 0   | 0   | 0   | 0    | 0    | 0   | 0   | 0   | 0   | 0   | 0   | 0   | 0   | 0   | 0    | 0   | 0   | 0   |
| Porphyromonas asaccharolytica                          | 0   | 0   | 0   | 0    | 0   | 0   | 0   | 0    | 0    | 0   | 0   | 0   | 0   | 0   | 0   | 0   | 0   | 0   | 0    | 0   | 0   | 0   |
| Anaerococcus octavius                                  | 0   | 0   | 0   | 178  | 0   | 0   | 0   | 0    | 0    | 0   | 0   | 274 | 0   | 0   | 0   | 33  | 0   | 0   | 0    | 0   | 0   | 0   |
| Fusobacterium                                          | 0   | 0   | 0   | 0    | 0   | 0   | 0   | 0    | 0    | 0   | 0   | 0   | 0   | 0   | 0   | 0   | 0   | 0   | 0    | 0   | 0   | 0   |
| Corynebacterium phoceense                              | 0   | 0   | 0   | 0    | 0   | 0   | 0   | 0    | 0    | 0   | 0   | 30  | 0   | 0   | 0   | 0   | 0   | 0   | 0    | 0   | 0   | 0   |
| Ruminococcus                                           | 0   | 0   | 0   | 0    | 0   | 0   | 0   | 0    | 0    | 0   | 0   | 0   | 0   | 0   | 0   | 0   | 0   | 0   | 0    | 0   | 0   | 0   |
| Arcanobacterium                                        | 0   | 0   | 0   | 0    | 0   | 0   | 0   | 0    | 0    | 0   | 0   | 0   | 0   | 0   | 0   | 0   | 0   | 0   | 0    | 0   | 0   | 0   |
| Khoudiadiopia                                          | 0   | 0   | 0   | 0    | 0   | 0   | 0   | 0    | 0    | 0   | 0   | 0   | 0   | 0   | 0   | 0   | 0   | 0   | 0    | 0   | 0   | 0   |
| Atopobium deltae                                       | 0   | 0   | 0   | 0    | 0   | 0   | 0   | 0    | 0    | 0   | 0   | 37  | 0   | 0   | 0   | 0   | 0   | 0   | 0    | 0   | 0   | 0   |
| Haemophilus paraaerolyticus                            | 0   | 0   | 0   | 0    | 0   | 0   | 0   | 0    | 0    | 0   | 0   | 0   | 0   | 0   | 0   | 0   | 0   | 0   | 0    | 0   | 0   | 0   |
| Howardella                                             | 0   | 0   | 0   | 0    | 0   | 0   | 0   | 0    | 0    | 0   | 0   | 0   | 0   | 0   | 0   | 0   | 0   | 0   | 0    | 0   | 0   | 0   |
| Prevotella buccalis                                    | 0   | 0   | 0   | 0    | 0   | 0   | 0   | 0    | 0    | 0   | 0   | 0   | 0   | 0   | 0   | 0   | 0   | 0   | 0    | 0   | 0   | 0   |
| Corynebacterium auris                                  | 0   | 0   | 0   | 0    | 0   | 0   | 0   | 0    | 0    | 0   | 0   | 0   | 0   | 0   | 0   | 0   | 0   | 0   | 0    | 0   | 0   | 0   |
| Candidatus Mycoplasma gireddii                         | 0   | 0   | 0   | 0    | 0   | 0   | 0   | 0    | 0    | 0   | 0   | 0   | 0   | 0   | 0   | 0   | 0   | 0   | 0    | 0   | 0   | 0   |
| Alloicoccus                                            | 0   | 0   | 0   | 0    | 79  | 0   | 0   | 0    | 0    | 0   | 0   | 0   | 0   | 0   | 0   | 0   | 0   | 0   | 0    | 0   | 0   | 0   |
| Corynebacterium founierii/mucifaciens/ureicelerivorans | 0   | 0   | 0   | 0    | 0   | 0   | 0   | 0    | 0    | 0   | 0   | 0   | 0   | 0   | 191 | 0   | 0   | 0   | 0    | 0   | 0   | 0   |
| Corynebacterium auris/timonense                        | 0   | 0   | 0   | 0    | 0   | 0   | 0   | 0    | 0    | 0   | 0   | 0   | 0   | 0   | 0   | 0   | 0   | 0   | 0    | 0   | 0   | 0   |
| Veillonella ratti/seminalis                            | 0   | 0   | 0   | 0    | 0   | 0   | 0   | 0    | 0    | 0   | 0   | 0   | 0   | 0   | 0   | 0   | 0   | 0   | 0    | 0   | 0   | 0   |

Samples S56 - S80

| Species                                    | S56 | S57 | S58 | S59 | S60 | S61 | S62 | S64 | S65  | S66 | S67 | S68 | S70  | S71 | S72 | S73 | S74 | S75 | S76 | S77 | S78 | S80 |
|--------------------------------------------|-----|-----|-----|-----|-----|-----|-----|-----|------|-----|-----|-----|------|-----|-----|-----|-----|-----|-----|-----|-----|-----|
| Lactobacillus gasseri                      | 0   | 0   | 0   | 0   | 0   | 0   | 0   | 0   | 0    | 0   | 0   | 0   | 0    | 0   | 0   | 0   | 0   | 0   | 0   | 0   | 0   | 0   |
| Tissierella                                | 0   | 0   | 0   | 0   | 0   | 0   | 0   | 0   | 0    | 0   | 0   | 0   | 0    | 0   | 0   | 0   | 0   | 0   | 0   | 0   | 0   | 0   |
| Granulicatella adiacens                    | 0   | 0   | 0   | 0   | 0   | 0   | 0   | 0   | 0    | 0   | 0   | 0   | 0    | 0   | 0   | 0   | 0   | 0   | 0   | 0   | 0   | 0   |
| Sutterella                                 | 0   | 0   | 0   | 0   | 0   | 0   | 0   | 0   | 0    | 0   | 0   | 0   | 0    | 0   | 0   | 0   | 0   | 0   | 0   | 0   | 0   | 0   |
| Prevotella nanceiensis                     | 0   | 0   | 0   | 0   | 0   | 0   | 0   | 0   | 0    | 0   | 0   | 0   | 0    | 0   | 0   | 0   | 0   | 0   | 0   | 0   | 0   | 0   |
| Lactobacillus jensenii                     | 0   | 0   | 0   | 0   | 0   | 0   | 0   | 0   | 0    | 0   | 0   | 0   | 0    | 0   | 0   | 0   | 0   | 0   | 0   | 0   | 0   | 0   |
| Lactobacillus crispatus                    | 0   | 0   | 0   | 0   | 0   | 0   | 0   | 0   | 0    | 0   | 0   | 0   | 0    | 0   | 0   | 0   | 0   | 0   | 0   | 0   | 0   | 0   |
| Candidate Division TM7 vaginal (genus)     | 0   | 0   | 0   | 0   | 0   | 0   | 0   | 0   | 0    | 0   | 0   | 0   | 0    | 0   | 0   | 0   | 0   | 0   | 0   | 0   | 0   | 0   |
| Candidatus Saccharimonas                   | 32  | 0   | 0   | 0   | 0   | 0   | 0   | 0   | 0    | 0   | 0   | 0   | 6430 | 0   | 0   | 0   | 0   | 0   | 0   | 0   | 0   | 0   |
| Peptococcus niger                          | 0   | 0   | 0   | 0   | 0   | 0   | 0   | 0   | 0    | 0   | 0   | 0   | 0    | 0   | 0   | 0   | 0   | 0   | 0   | 0   | 0   | 0   |
| Neisseria flavescens/perflava              | 0   | 0   | 0   | 0   | 0   | 0   | 0   | 0   | 0    | 0   | 0   | 0   | 0    | 0   | 0   | 0   | 280 | 0   | 0   | 0   | 0   | 0   |
| Gemella sanguinis                          | 0   | 0   | 0   | 0   | 0   | 0   | 0   | 0   | 0    | 0   | 0   | 0   | 0    | 0   | 0   | 0   | 0   | 0   | 0   | 0   | 0   | 0   |
| Porphyromonas                              | 0   | 0   | 0   | 0   | 0   | 0   | 0   | 0   | 0    | 0   | 0   | 0   | 0    | 0   | 0   | 0   | 0   | 0   | 0   | 0   | 0   | 0   |
| Prevotella                                 | 0   | 0   | 0   | 0   | 0   | 0   | 0   | 0   | 0    | 0   | 0   | 0   | 0    | 0   | 0   | 0   | 0   | 0   | 0   | 0   | 0   | 0   |
| Corynebacterium thomssenii                 | 0   | 0   | 0   | 0   | 0   | 0   | 0   | 0   | 0    | 0   | 0   | 0   | 0    | 0   | 0   | 0   | 0   | 0   | 0   | 0   | 0   | 0   |
| Lachnospiraceae                            | 0   | 0   | 0   | 0   | 0   | 0   | 0   | 0   | 0    | 0   | 0   | 0   | 0    | 0   | 0   | 0   | 0   | 0   | 0   | 0   | 0   | 0   |
| Corynebacterium tuberculoostearicum        | 0   | 0   | 0   | 0   | 0   | 0   | 0   | 0   | 0    | 0   | 0   | 0   | 0    | 0   | 0   | 0   | 0   | 0   | 0   | 0   | 0   | 0   |
| Dermabacter hominis                        | 0   | 0   | 0   | 92  | 0   | 0   | 0   | 33  | 0    | 0   | 0   | 0   | 0    | 0   | 55  | 0   | 0   | 0   | 0   | 0   | 0   | 0   |
| Veillonella rogosae                        | 0   | 0   | 0   | 0   | 0   | 0   | 0   | 0   | 0    | 0   | 0   | 0   | 0    | 0   | 0   | 0   | 0   | 0   | 0   | 0   | 0   | 0   |
| Actinomyces hongkongensis                  | 0   | 0   | 0   | 0   | 0   | 0   | 0   | 0   | 0    | 0   | 0   | 0   | 0    | 0   | 0   | 0   | 0   | 0   | 0   | 0   | 0   | 0   |
| Veillonella parvula/rogosae                | 0   | 0   | 0   | 0   | 0   | 0   | 0   | 0   | 0    | 0   | 0   | 0   | 0    | 0   | 0   | 0   | 0   | 0   | 0   | 0   | 0   | 0   |
| Anaerococcus provencensis                  | 0   | 0   | 0   | 0   | 0   | 0   | 0   | 0   | 0    | 0   | 0   | 0   | 0    | 0   | 0   | 0   | 33  | 0   | 0   | 0   | 0   | 0   |
| Porphyromonas sp. type 1                   | 0   | 0   | 0   | 0   | 0   | 0   | 0   | 0   | 0    | 0   | 0   | 0   | 0    | 0   | 0   | 0   | 0   | 0   | 0   | 0   | 0   | 0   |
| Brevibacterium paucivorans                 | 0   | 0   | 0   | 0   | 0   | 0   | 0   | 0   | 4427 | 0   | 0   | 0   | 0    | 0   | 0   | 0   | 0   | 42  | 283 | 0   | 0   | 0   |
| Peptostreptococcus                         | 0   | 0   | 0   | 0   | 0   | 0   | 0   | 0   | 0    | 0   | 0   | 0   | 0    | 0   | 0   | 0   | 0   | 0   | 0   | 0   | 0   | 0   |
| Facklamia languida                         | 0   | 0   | 0   | 0   | 65  | 0   | 0   | 0   | 0    | 0   | 0   | 0   | 0    | 0   | 0   | 0   | 0   | 0   | 0   | 0   | 0   | 0   |
| Streptobacillus                            | 0   | 0   | 0   | 0   | 0   | 0   | 0   | 0   | 0    | 0   | 0   | 0   | 0    | 0   | 0   | 0   | 0   | 0   | 0   | 0   | 0   | 0   |
| Gemella haemolysans                        | 0   | 0   | 0   | 0   | 0   | 0   | 0   | 0   | 0    | 0   | 0   | 0   | 0    | 0   | 0   | 0   | 0   | 0   | 0   | 0   | 0   | 0   |
| Haemophilus sputorum                       | 0   | 0   | 0   | 0   | 0   | 0   | 0   | 0   | 0    | 378 | 0   | 0   | 0    | 0   | 0   | 0   | 0   | 0   | 0   | 0   | 0   | 0   |
| Actinotignum urinale                       | 0   | 0   | 0   | 0   | 0   | 0   | 0   | 0   | 0    | 0   | 0   | 0   | 0    | 0   | 0   | 0   | 0   | 0   | 0   | 0   | 0   | 0   |
| Dialister pneumosintes                     | 0   | 0   | 0   | 0   | 0   | 0   | 0   | 0   | 0    | 0   | 0   | 0   | 0    | 0   | 0   | 0   | 0   | 0   | 0   | 0   | 0   | 0   |
| Treponema pallidum                         | 0   | 0   | 0   | 0   | 0   | 0   | 0   | 0   | 0    | 0   | 0   | 0   | 0    | 0   | 0   | 0   | 0   | 0   | 0   | 0   | 0   | 0   |
| Porphyromonas bennonis                     | 0   | 0   | 0   | 0   | 0   | 0   | 0   | 0   | 0    | 0   | 0   | 0   | 0    | 0   | 0   | 0   | 0   | 0   | 0   | 0   | 0   | 0   |
| Bergeyella                                 | 0   | 0   | 0   | 0   | 0   | 0   | 0   | 0   | 0    | 0   | 0   | 0   | 0    | 0   | 0   | 0   | 0   | 0   | 0   | 0   | 0   | 0   |
| Actinotignum schaalii/timonense            | 0   | 0   | 0   | 0   | 0   | 0   | 0   | 0   | 0    | 0   | 0   | 0   | 0    | 0   | 0   | 0   | 0   | 0   | 0   | 0   | 0   | 0   |
| Klebsiella aerogenes/Kluyvera cryocrescens | 0   | 0   | 0   | 0   | 0   | 0   | 0   | 0   | 0    | 0   | 0   | 0   | 0    | 0   | 0   | 0   | 0   | 0   | 0   | 0   | 0   | 0   |
| Rothia mucilaginosa                        | 0   | 0   | 0   | 0   | 0   | 0   | 0   | 0   | 0    | 0   | 0   | 0   | 0    | 0   | 0   | 0   | 0   | 0   | 0   | 0   | 0   | 0   |
| Solobacterium moorei                       | 0   | 0   | 0   | 0   | 0   | 0   | 0   | 0   | 0    | 0   | 0   | 0   | 0    | 0   | 0   | 0   | 0   | 0   | 0   | 0   | 0   | 0   |
| Mageeibacillus indolicus                   | 0   | 0   | 0   | 0   | 0   | 0   | 0   | 0   | 0    | 0   | 0   | 0   | 0    | 0   | 0   | 0   | 0   | 0   | 0   | 0   | 0   | 0   |
| Serratia urelytica                         | 0   | 0   | 0   | 0   | 0   | 0   | 0   | 0   | 0    | 0   | 0   | 0   | 0    | 0   | 0   | 0   | 0   | 0   | 0   | 0   | 0   | 0   |
| Peptoniphilus obesi                        | 0   | 0   | 0   | 0   | 0   | 0   | 0   | 0   | 0    | 0   | 0   | 0   | 0    | 0   | 0   | 0   | 0   | 0   | 0   | 0   | 0   | 0   |
| Peptoniphilus harei/phoceensis             | 0   | 0   | 0   | 0   | 0   | 0   | 0   | 0   | 0    | 0   | 0   | 0   | 0    | 0   | 0   | 0   | 0   | 0   | 0   | 0   | 0   | 0   |
| Corynebacterium atypicum                   | 0   | 0   | 0   | 0   | 0   | 0   | 0   | 0   | 0    | 0   | 0   | 0   | 0    | 0   | 0   | 0   | 0   | 0   | 0   | 0   | 0   | 0   |
| Atopobium minutum                          | 0   | 0   | 0   | 0   | 0   | 0   | 0   | 0   | 0    | 0   | 0   | 0   | 0    | 0   | 0   | 0   | 0   | 0   | 0   | 0   | 0   | 0   |
| Corynebacterium genitalium                 | 0   | 0   | 0   | 0   | 0   | 0   | 0   | 0   | 462  | 0   | 0   | 0   | 0    | 0   | 0   | 0   | 0   | 0   | 0   | 0   | 0   | 0   |
| Bifidobacterium tsurumiense                | 0   | 0   | 0   | 0   | 0   | 0   | 0   | 0   | 0    | 0   | 0   | 0   | 0    | 0   | 0   | 0   | 0   | 0   | 0   | 0   | 0   | 0   |
| Micrococcus                                | 0   | 0   | 0   | 0   | 0   | 0   | 0   | 0   | 0    | 0   | 0   | 0   | 0    | 0   | 0   | 0   | 0   | 0   | 0   | 0   | 0   | 0   |
| Megasphaera genomsp. type_1                | 0   | 0   | 0   | 0   | 0   | 0   | 0   | 0   | 0    | 0   | 0   | 0   | 0    | 0   | 0   | 0   | 0   | 0   | 0   | 0   | 0   | 0   |
| Enhydrobacter                              | 0   | 0   | 0   | 0   | 0   | 0   | 0   | 0   | 0    | 0   | 0   | 0   | 0    | 0   | 0   | 0   | 0   | 0   | 0   | 0   | 0   | 0   |
| Fastidiosipila sanguinis                   | 0   | 0   | 0   | 0   | 0   | 0   | 0   | 0   | 0    | 0   | 0   | 0   | 0    | 0   | 0   | 0   | 0   | 0   | 0   | 0   | 0   | 0   |
| Prevotellamassilia                         | 0   | 0   | 0   | 0   | 0   | 0   | 0   | 0   | 0    | 0   | 0   | 0   | 0    | 0   | 0   | 0   | 0   | 0   | 0   | 0   | 0   | 0   |
| Peptostreptococcaceae                      | 0   | 0   | 0   | 0   | 0   | 0   | 0   | 0   | 0    | 0   | 0   | 0   | 0    | 0   | 0   | 0   | 0   | 0   | 0   | 0   | 0   | 0   |
| Morganella morganii                        | 0   | 0   | 0   | 0   | 0   | 0   | 0   | 0   | 0    | 0   | 0   | 0   | 0    | 0   | 0   | 0   | 0   | 0   | 0   | 0   | 0   | 0   |
| Neofamilia                                 | 0   | 0   | 0   | 0   | 0   | 0   | 0   | 0   | 0    | 0   | 0   | 0   | 0    | 0   | 0   | 0   | 0   | 0   | 0   | 0   | 0   | 0   |
| Pseudoclavibacter bifida                   | 0   | 0   | 0   | 0   | 0   | 0   | 0   | 0   | 278  | 0   | 0   | 0   | 0    | 0   | 0   | 0   | 0   | 0   | 0   | 0   | 0   | 0   |
| Helcococcus                                | 0   | 0   | 0   | 0   | 0   | 0   | 0   | 0   | 0    | 0   | 0   | 0   | 0    | 0   | 0   | 0   | 0   | 0   | 0   | 0   | 0   | 0   |
| Brevibacterium ravenspurgense              | 0   | 0   | 0   | 0   | 0   | 0   | 0   | 0   | 0    | 0   | 0   | 0   | 0    | 0   | 0   | 0   | 0   | 0   | 0   | 0   | 0   | 0   |
| Moryella indoligenes                       | 0   | 0   | 0   | 0   | 0   | 0   | 0   | 0   | 0    | 0   | 0   | 0   | 0    | 0   | 0   | 0   | 0   | 0   | 0   | 0   | 0   | 0   |
| Olegusella massiliensis                    | 0   | 0   | 0   | 0   | 0   | 0   | 0   | 0   | 0    | 0   | 0   | 0   | 0    | 0   | 0   | 0   | 0   | 0   | 0   | 0   | 0   | 0   |
| Morococcus cerebrosus                      | 0   | 0   | 0   | 0   | 0   | 0   | 0   | 0   | 0    | 0   | 0   | 0   | 0    | 0   | 0   | 0   | 0   | 0   | 0   | 0   | 0   | 0   |
| Prevotella scopos                          | 0   | 0   | 0   | 0   | 0   | 0   | 0   | 0   | 0    | 0   | 0   | 0   | 0    | 0   | 0   | 0   | 0   | 0   | 0   | 0   | 0   | 0   |
| Veillonella parvula/tobetsuensis           | 0   | 0   | 0   | 0   | 0   | 0   | 0   | 0   | 0    | 0   | 0   | 0   | 0    | 0   | 0   | 0   | 0   | 0   | 0   | 0   | 0   | 0   |
| Moryella                                   | 0   | 0   | 0   | 0   | 0   | 0   | 0   | 0   | 0    | 0   | 0   | 0   | 0    | 0   | 0   | 0   | 0   | 0   | 0   | 0   | 0   | 0   |
| Atopobium parvulum                         | 0   | 0   | 0   | 0   | 0   | 0   | 0   | 0   | 0    | 0   | 0   | 0   | 0    | 0   | 0   | 0   | 0   | 0   | 0   | 0   | 0   | 0   |
| Serratia marcescens                        | 0   | 0   | 0   | 0   | 0   | 0   | 0   | 0   | 0    | 0   | 0   | 0   | 0    | 0   | 0   | 0   | 0   | 0   | 0   | 0   | 0   | 0   |
| Collinsella aerofaciens                    | 0   | 0   | 0   | 0   | 0   | 0   | 0   | 0   | 0    | 0   | 0   | 0   | 0    | 0   | 0   | 0   | 0   | 0   | 0   | 0   | 0   | 0   |
| Curvibacter                                | 0   | 0   | 0   | 0   | 0   | 0   | 0   | 42  | 0    | 0   | 0   | 0   | 0    | 0   | 0   | 0   | 0   | 0   | 0   | 0   | 0   | 0   |
| Rothia dentocariosa                        | 0   | 0   | 0   | 0   | 0   | 0   | 0   | 0   | 0    | 0   | 0   | 0   | 0    | 0   | 0   | 0   | 0   | 0   | 0   | 0   | 0   | 0   |
| Prevotella bergensis                       | 0   | 0   | 0   | 0   | 0   | 0   | 0   | 0   | 0    | 0   | 0   | 0   | 0    | 0   | 0   | 0   | 0   | 0   | 0   | 0   | 0   | 0   |
| Corynebacterium sundsvallense              | 0   | 0   | 0   | 0   | 0   | 0   | 0   | 0   | 0    | 0   | 0   | 0   | 0    | 0   | 0   | 0   | 0   | 0   | 0   | 0   | 0   | 0   |

Samples S56 - S80

| Species                                       | S56 | S57 | S58 | S59 | S60 | S61 | S62 | S64 | S65 | S66 | S67 | S68 | S70 | S71 | S72 | S73 | S74 | S75 | S76 | S77 | S78 | S80 |   |
|-----------------------------------------------|-----|-----|-----|-----|-----|-----|-----|-----|-----|-----|-----|-----|-----|-----|-----|-----|-----|-----|-----|-----|-----|-----|---|
| Coriobacteria                                 | 0   | 0   | 0   | 0   | 0   | 0   | 0   | 0   | 0   | 0   | 0   | 0   | 0   | 0   | 0   | 0   | 0   | 0   | 0   | 0   | 0   | 0   |   |
| Neisseria meningitidis                        | 0   | 0   | 0   | 0   | 0   | 0   | 0   | 0   | 0   | 0   | 0   | 0   | 0   | 0   | 0   | 0   | 0   | 0   | 0   | 0   | 0   | 0   |   |
| Dermacoccus nishinomiyaensis                  | 0   | 0   | 0   | 0   | 0   | 0   | 0   | 0   | 0   | 0   | 0   | 0   | 0   | 0   | 0   | 0   | 0   | 0   | 0   | 0   | 0   | 0   |   |
| Leptotrichia                                  | 0   | 0   | 0   | 0   | 0   | 0   | 0   | 0   | 0   | 0   | 0   | 0   | 0   | 0   | 0   | 0   | 0   | 0   | 0   | 0   | 0   | 0   |   |
| Microbacteriaceae                             | 0   | 0   | 0   | 0   | 0   | 0   | 0   | 0   | 0   | 0   | 0   | 0   | 0   | 0   | 0   | 0   | 0   | 0   | 0   | 0   | 0   | 0   |   |
| Klebsiella pneumoniae/variiicola              | 0   | 0   | 0   | 0   | 0   | 0   | 0   | 0   | 0   | 0   | 0   | 0   | 0   | 0   | 0   | 0   | 0   | 0   | 0   | 0   | 0   | 0   |   |
| Hafnia alvei                                  | 0   | 0   | 0   | 0   | 0   | 0   | 0   | 0   | 0   | 0   | 0   | 0   | 0   | 0   | 0   | 0   | 0   | 0   | 0   | 0   | 0   | 0   |   |
| Caulobacter                                   | 0   | 0   | 0   | 0   | 0   | 0   | 0   | 0   | 0   | 0   | 0   | 0   | 0   | 0   | 0   | 0   | 0   | 0   | 0   | 0   | 0   | 0   |   |
| Lactobacillus reuteri                         | 0   | 0   | 0   | 0   | 0   | 0   | 0   | 0   | 0   | 0   | 0   | 0   | 0   | 0   | 0   | 0   | 0   | 0   | 0   | 0   | 0   | 0   |   |
| Gemella morbillorum                           | 0   | 0   | 0   | 0   | 0   | 0   | 0   | 0   | 0   | 0   | 0   | 0   | 0   | 0   | 0   | 0   | 0   | 0   | 0   | 0   | 0   | 0   |   |
| Rothia                                        | 0   | 0   | 0   | 0   | 0   | 0   | 0   | 0   | 0   | 0   | 0   | 0   | 0   | 0   | 0   | 0   | 0   | 0   | 0   | 0   | 0   | 0   |   |
| Campylobacter                                 | 0   | 0   | 0   | 0   | 0   | 0   | 0   | 0   | 0   | 0   | 0   | 0   | 0   | 0   | 0   | 0   | 0   | 0   | 0   | 0   | 0   | 0   |   |
| Prevotella genogroup 3                        | 0   | 0   | 0   | 0   | 0   | 0   | 0   | 0   | 0   | 0   | 0   | 0   | 0   | 0   | 0   | 0   | 0   | 0   | 0   | 0   | 0   | 0   |   |
| Staphylococcus warneri                        | 0   | 0   | 0   | 0   | 0   | 0   | 0   | 0   | 0   | 0   | 0   | 0   | 0   | 0   | 96  | 0   | 0   | 0   | 0   | 0   | 0   | 34  | 0 |
| Blautia wexlerae                              | 0   | 0   | 0   | 0   | 0   | 0   | 0   | 0   | 0   | 0   | 0   | 0   | 0   | 0   | 0   | 0   | 0   | 0   | 0   | 0   | 0   | 0   |   |
| Lachnoanaerobaculum                           | 0   | 0   | 0   | 0   | 0   | 0   | 0   | 0   | 0   | 0   | 0   | 0   | 0   | 0   | 0   | 0   | 0   | 0   | 0   | 0   | 0   | 0   |   |
| Anaerococcus hydrogenalis/senegalensis        | 0   | 0   | 0   | 0   | 0   | 0   | 0   | 0   | 0   | 0   | 0   | 0   | 0   | 0   | 0   | 0   | 0   | 0   | 0   | 0   | 0   | 0   |   |
| Brevibacterium mcbrellneri                    | 0   | 0   | 0   | 0   | 0   | 47  | 0   | 0   | 0   | 0   | 0   | 0   | 0   | 0   | 0   | 0   | 0   | 0   | 0   | 68  | 0   | 0   |   |
| Corynebacterium glaucum                       | 0   | 0   | 0   | 0   | 0   | 0   | 0   | 0   | 0   | 0   | 0   | 0   | 0   | 0   | 0   | 0   | 0   | 0   | 0   | 0   | 0   | 0   |   |
| Prevotella salivae                            | 0   | 0   | 0   | 0   | 0   | 0   | 0   | 0   | 0   | 0   | 0   | 0   | 0   | 0   | 0   | 0   | 0   | 0   | 0   | 0   | 0   | 0   |   |
| Coriobacteriaceae                             | 0   | 0   | 0   | 0   | 0   | 0   | 0   | 0   | 0   | 0   | 0   | 0   | 0   | 0   | 0   | 0   | 0   | 0   | 0   | 0   | 0   | 0   |   |
| Bulleidia                                     | 0   | 0   | 0   | 0   | 0   | 0   | 0   | 0   | 0   | 0   | 0   | 0   | 0   | 0   | 0   | 0   | 0   | 0   | 0   | 0   | 0   | 0   |   |
| Peptococcus                                   | 0   | 0   | 0   | 0   | 0   | 0   | 0   | 0   | 0   | 0   | 0   | 0   | 0   | 0   | 0   | 0   | 0   | 0   | 0   | 0   | 0   | 0   |   |
| Serratia marcescens/nematodiphila             | 0   | 0   | 0   | 0   | 0   | 0   | 0   | 0   | 0   | 0   | 0   | 0   | 0   | 0   | 0   | 0   | 0   | 0   | 0   | 0   | 0   | 0   |   |
| Leptotrichia wadei                            | 0   | 0   | 0   | 0   | 0   | 0   | 0   | 0   | 0   | 0   | 0   | 0   | 0   | 0   | 0   | 0   | 0   | 0   | 0   | 0   | 0   | 0   |   |
| Neisseriaceae                                 | 0   | 0   | 0   | 0   | 0   | 0   | 0   | 0   | 0   | 0   | 0   | 0   | 0   | 0   | 0   | 0   | 0   | 0   | 0   | 0   | 0   | 0   |   |
| Aerococcus sanguinicola                       | 0   | 0   | 0   | 0   | 0   | 0   | 0   | 0   | 0   | 0   | 0   | 0   | 0   | 0   | 0   | 0   | 0   | 0   | 0   | 0   | 0   | 0   |   |
| Criobacterium bergeronii                      | 0   | 0   | 0   | 0   | 0   | 0   | 0   | 0   | 0   | 0   | 0   | 0   | 0   | 0   | 0   | 0   | 0   | 0   | 0   | 0   | 0   | 0   |   |
| Brevibacterium luteolum                       | 0   | 0   | 0   | 0   | 0   | 0   | 0   | 0   | 0   | 0   | 0   | 0   | 0   | 0   | 0   | 0   | 0   | 0   | 0   | 0   | 0   | 0   |   |
| Klebsiella pneumoniae                         | 0   | 0   | 0   | 0   | 0   | 0   | 0   | 0   | 0   | 0   | 0   | 0   | 0   | 0   | 0   | 0   | 0   | 0   | 0   | 0   | 0   | 0   |   |
| Actinomyces oris/viscosus                     | 0   | 0   | 0   | 0   | 0   | 0   | 0   | 0   | 0   | 0   | 0   | 0   | 0   | 0   | 0   | 0   | 0   | 0   | 0   | 0   | 0   | 0   |   |
| Mycobacterium chelonae complex                | 0   | 0   | 0   | 0   | 0   | 0   | 0   | 0   | 0   | 0   | 0   | 0   | 0   | 0   | 0   | 0   | 0   | 0   | 0   | 0   | 0   | 0   |   |
| Corynebacterium jeddahense                    | 0   | 0   | 0   | 0   | 0   | 0   | 0   | 0   | 0   | 0   | 0   | 0   | 0   | 0   | 0   | 0   | 0   | 0   | 0   | 0   | 0   | 0   |   |
| Peptostreptococcus stomatis                   | 0   | 0   | 0   | 0   | 0   | 0   | 0   | 0   | 0   | 0   | 0   | 0   | 0   | 0   | 0   | 0   | 0   | 0   | 0   | 0   | 0   | 0   |   |
| Megasphaera                                   | 0   | 0   | 0   | 0   | 0   | 0   | 0   | 0   | 0   | 0   | 0   | 0   | 0   | 0   | 0   | 0   | 0   | 0   | 0   | 0   | 0   | 0   |   |
| Campylobacter rectus/showae                   | 0   | 0   | 0   | 0   | 0   | 0   | 0   | 0   | 0   | 0   | 0   | 0   | 0   | 0   | 0   | 0   | 0   | 0   | 0   | 0   | 0   | 0   |   |
| Staphylococcus carnosus/condimenti            | 0   | 0   | 0   | 0   | 0   | 0   | 0   | 0   | 0   | 0   | 0   | 0   | 0   | 0   | 0   | 0   | 0   | 0   | 0   | 0   | 0   | 0   |   |
| Prevotella pallens                            | 0   | 0   | 0   | 0   | 0   | 0   | 0   | 0   | 0   | 0   | 0   | 0   | 0   | 0   | 0   | 0   | 0   | 0   | 0   | 0   | 0   | 0   |   |
| Prolinoborus fasciculus/Acinetobacter lwoffii | 0   | 0   | 0   | 0   | 0   | 0   | 0   | 0   | 0   | 0   | 0   | 0   | 0   | 0   | 0   | 0   | 0   | 0   | 0   | 0   | 0   | 0   |   |
| Staphylococcus nepalensis                     | 0   | 0   | 0   | 0   | 0   | 0   | 0   | 0   | 0   | 0   | 0   | 0   | 0   | 0   | 0   | 0   | 0   | 0   | 0   | 0   | 0   | 0   |   |
| Staphylococcaceae                             | 0   | 0   | 0   | 0   | 0   | 0   | 0   | 0   | 0   | 0   | 0   | 0   | 0   | 0   | 0   | 0   | 0   | 0   | 0   | 0   | 0   | 0   |   |
| Cruoricaptor                                  | 0   | 0   | 0   | 0   | 0   | 0   | 0   | 0   | 0   | 0   | 0   | 0   | 0   | 0   | 0   | 0   | 0   | 0   | 0   | 0   | 0   | 0   |   |
| [Eubacterium] hallii                          | 0   | 0   | 0   | 0   | 0   | 0   | 0   | 0   | 0   | 0   | 0   | 0   | 0   | 0   | 0   | 0   | 0   | 0   | 0   | 0   | 0   | 0   |   |
| BVAB1 (species)                               | 0   | 0   | 0   | 0   | 0   | 0   | 0   | 0   | 0   | 0   | 0   | 0   | 0   | 0   | 0   | 0   | 0   | 0   | 0   | 0   | 0   | 0   |   |
| Stomatobaculum                                | 0   | 0   | 0   | 0   | 0   | 0   | 0   | 0   | 0   | 0   | 0   | 0   | 0   | 0   | 0   | 0   | 0   | 0   | 0   | 0   | 0   | 0   |   |
| Mycoplasma                                    | 0   | 0   | 0   | 0   | 0   | 0   | 0   | 0   | 0   | 0   | 0   | 0   | 0   | 0   | 0   | 0   | 0   | 0   | 0   | 0   | 0   | 0   |   |
| Catenibacterium mitsuokai                     | 0   | 0   | 0   | 0   | 0   | 0   | 0   | 0   | 0   | 0   | 0   | 0   | 0   | 0   | 0   | 0   | 0   | 0   | 0   | 0   | 0   | 0   |   |
| Veillonella parvula                           | 0   | 0   | 0   | 0   | 0   | 0   | 0   | 0   | 0   | 0   | 0   | 0   | 0   | 0   | 0   | 0   | 0   | 0   | 0   | 0   | 0   | 0   |   |
| Corynebacterium kroppenstedtii                | 0   | 0   | 0   | 0   | 0   | 0   | 0   | 0   | 0   | 0   | 0   | 0   | 0   | 0   | 0   | 0   | 0   | 0   | 0   | 0   | 0   | 0   |   |
| Eremococcus coleocola                         | 0   | 0   | 0   | 0   | 0   | 0   | 0   | 0   | 0   | 0   | 0   | 0   | 0   | 0   | 0   | 0   | 0   | 0   | 0   | 0   | 0   | 0   |   |
| Actinomyces europaeus                         | 0   | 0   | 0   | 0   | 0   | 0   | 0   | 0   | 0   | 0   | 0   | 0   | 0   | 0   | 0   | 0   | 0   | 0   | 0   | 0   | 0   | 0   |   |
| Peptoniphilus senegalensis                    | 0   | 0   | 0   | 0   | 0   | 0   | 0   | 0   | 0   | 0   | 0   | 0   | 0   | 0   | 0   | 0   | 0   | 0   | 0   | 0   | 0   | 0   |   |
| Corynebacterium afermentans/humii             | 0   | 0   | 0   | 0   | 0   | 0   | 0   | 0   | 0   | 0   | 0   | 0   | 0   | 0   | 0   | 0   | 0   | 0   | 0   | 0   | 0   | 0   |   |
| Acinetobacter                                 | 0   | 0   | 0   | 0   | 0   | 0   | 0   | 0   | 0   | 0   | 0   | 0   | 0   | 0   | 0   | 0   | 0   | 0   | 0   | 0   | 0   | 0   |   |
| Eggerthellaceae                               | 0   | 0   | 0   | 0   | 0   | 0   | 0   | 0   | 0   | 0   | 0   | 0   | 0   | 0   | 0   | 0   | 0   | 0   | 0   | 0   | 0   | 0   |   |
| Corynebacterium mucifaciens                   | 0   | 0   | 0   | 0   | 0   | 0   | 0   | 0   | 0   | 0   | 0   | 0   | 0   | 0   | 0   | 0   | 0   | 0   | 0   | 0   | 0   | 0   |   |
| Filifactor                                    | 0   | 0   | 0   | 0   | 0   | 0   | 0   | 0   | 0   | 0   | 0   | 0   | 0   | 0   | 0   | 0   | 0   | 0   | 0   | 0   | 0   | 0   |   |
| Ruminococcus faecis                           | 0   | 0   | 0   | 0   | 0   | 0   | 0   | 0   | 0   | 0   | 0   | 0   | 0   | 0   | 0   | 0   | 0   | 0   | 0   | 0   | 0   | 0   |   |
| Lactobacillus                                 | 0   | 0   | 0   | 0   | 0   | 0   | 0   | 0   | 0   | 0   | 0   | 0   | 0   | 0   | 0   | 0   | 0   | 0   | 0   | 0   | 0   | 0   |   |
| Peptoniphilus grossensis/rhinitidis           | 0   | 0   | 0   | 0   | 0   | 0   | 0   | 0   | 0   | 0   | 0   | 0   | 0   | 0   | 0   | 0   | 0   | 0   | 0   | 0   | 0   | 0   |   |
| Aerococcus urinaequi/viridans                 | 0   | 0   | 0   | 0   | 0   | 0   | 0   | 0   | 48  | 0   | 0   | 0   | 0   | 0   | 0   | 0   | 0   | 0   | 0   | 0   | 0   | 0   |   |
| Anaerostipes hadrus                           | 0   | 0   | 0   | 0   | 0   | 0   | 0   | 0   | 0   | 0   | 0   | 0   | 0   | 0   | 0   | 0   | 0   | 0   | 0   | 0   | 0   | 0   |   |
| Lagierella                                    | 0   | 0   | 0   | 0   | 0   | 0   | 0   | 0   | 0   | 0   | 0   | 0   | 0   | 0   | 0   | 0   | 0   | 0   | 0   | 0   | 0   | 0   |   |
| Neisseria cinerea/meningitidis                | 0   | 0   | 0   | 0   | 0   | 0   | 0   | 0   | 0   | 0   | 0   | 0   | 0   | 0   | 0   | 0   | 0   | 0   | 0   | 0   | 0   | 0   |   |
| Micrococcus lylae                             | 0   | 0   | 0   | 0   | 0   | 0   | 0   | 0   | 0   | 0   | 0   | 0   | 0   | 0   | 0   | 0   | 0   | 0   | 0   | 0   | 0   | 0   |   |
| Staphylococcus cohnii                         | 0   | 0   | 0   | 0   | 0   | 0   | 0   | 0   | 0   | 0   | 0   | 0   | 0   | 0   | 0   | 0   | 0   | 0   | 0   | 0   | 0   | 0   |   |
| Casaltella massiliensis                       | 0   | 0   | 0   | 0   | 0   | 0   | 0   | 0   | 0   | 0   | 0   | 0   | 0   | 0   | 0   | 0   | 0   | 0   | 0   | 0   | 0   | 0   |   |
| Stomatobaculum longum                         | 0   | 0   | 0   | 0   | 0   | 0   | 0   | 0   | 0   | 0   | 0   | 0   | 0   | 0   | 0   | 0   | 0   | 0   | 0   | 0   | 0   | 0   |   |
| Lautropia                                     | 0   | 0   | 0   | 0   | 0   | 0   | 0   | 0   | 0   | 0   | 0   | 0   | 0   | 0   | 0   | 0   | 0   | 0   | 0   | 0   | 0   | 0   |   |
| Fastidiosipila                                | 0   | 0   | 0   | 0   | 0   | 0   | 0   | 0   | 0   | 0   | 0   | 0   | 0   | 0   | 0   | 0   | 0   | 0   | 0   | 0   | 0   | 0   |   |

Samples S56 - S80

| Species                                      | S56 | S57 | S58 | S59 | S60 | S61 | S62 | S64 | S65 | S66 | S67 | S68 | S70 | S71 | S72 | S73 | S74 | S75 | S76 | S77 | S78 | S80 |
|----------------------------------------------|-----|-----|-----|-----|-----|-----|-----|-----|-----|-----|-----|-----|-----|-----|-----|-----|-----|-----|-----|-----|-----|-----|
| Corynebacterium durum                        | 0   | 0   | 0   | 0   | 0   | 0   | 0   | 0   | 0   | 0   | 0   | 0   | 0   | 0   | 0   | 0   | 0   | 0   | 0   | 0   | 0   | 0   |
| Actinomyces graevenitzi                      | 0   | 0   | 0   | 0   | 0   | 0   | 0   | 0   | 0   | 0   | 0   | 0   | 0   | 0   | 0   | 0   | 0   | 0   | 0   | 0   | 0   | 0   |
| Staphylococcus cohnii/saprophyticus          | 0   | 0   | 0   | 0   | 0   | 0   | 0   | 0   | 0   | 0   | 0   | 0   | 0   | 0   | 0   | 0   | 0   | 0   | 0   | 0   | 0   | 0   |
| Leptotrichia trevisanii                      | 0   | 0   | 0   | 0   | 0   | 0   | 0   | 0   | 0   | 0   | 0   | 0   | 0   | 0   | 0   | 0   | 0   | 0   | 0   | 0   | 0   | 0   |
| Candidatus Paraburkholderia calva            | 0   | 0   | 0   | 0   | 0   | 0   | 0   | 0   | 0   | 0   | 0   | 0   | 0   | 0   | 0   | 0   | 0   | 0   | 0   | 0   | 0   | 0   |
| Actinomyces urogenitalis                     | 0   | 0   | 0   | 0   | 0   | 0   | 0   | 0   | 0   | 0   | 0   | 0   | 0   | 0   | 0   | 0   | 0   | 0   | 0   | 0   | 0   | 0   |
| Clostridiales                                | 0   | 0   | 0   | 0   | 0   | 0   | 0   | 0   | 0   | 0   | 0   | 0   | 0   | 0   | 0   | 0   | 0   | 0   | 0   | 0   | 0   | 0   |
| Pasteurella caballi                          | 0   | 0   | 0   | 0   | 0   | 0   | 0   | 0   | 0   | 0   | 0   | 0   | 0   | 0   | 0   | 0   | 0   | 0   | 0   | 0   | 0   | 0   |
| Fusobacterium hwasookii/nucleatum            | 0   | 0   | 0   | 0   | 0   | 0   | 0   | 0   | 0   | 0   | 0   | 0   | 0   | 0   | 0   | 0   | 0   | 0   | 0   | 0   | 0   | 0   |
| Corynebacterium riegelii                     | 0   | 0   | 0   | 0   | 0   | 0   | 0   | 0   | 0   | 0   | 0   | 0   | 0   | 0   | 0   | 0   | 0   | 0   | 0   | 0   | 0   | 0   |
| Hafnia                                       | 0   | 0   | 0   | 0   | 0   | 0   | 0   | 0   | 0   | 0   | 0   | 0   | 0   | 0   | 0   | 0   | 0   | 0   | 0   | 0   | 0   | 0   |
| Staphylococcus equorum/saprophyticus/xylosum | 0   | 0   | 0   | 0   | 0   | 0   | 0   | 0   | 0   | 0   | 0   | 0   | 0   | 0   | 0   | 0   | 0   | 0   | 0   | 0   | 0   | 0   |
| Acinetobacter lwoffii                        | 0   | 0   | 0   | 0   | 0   | 0   | 0   | 0   | 0   | 0   | 0   | 0   | 0   | 0   | 0   | 0   | 0   | 0   | 0   | 0   | 0   | 0   |
| Micrococcus cohnii                           | 0   | 0   | 0   | 0   | 0   | 0   | 0   | 0   | 0   | 0   | 0   | 0   | 0   | 0   | 0   | 0   | 0   | 0   | 0   | 0   | 0   | 0   |
| Pseudoclavibacter faecalis                   | 0   | 0   | 0   | 0   | 0   | 0   | 0   | 0   | 0   | 0   | 0   | 0   | 0   | 0   | 0   | 0   | 0   | 0   | 0   | 0   | 0   | 0   |
| Leptotrichia buccalis                        | 0   | 0   | 0   | 0   | 0   | 0   | 0   | 0   | 0   | 41  | 0   | 0   | 0   | 0   | 0   | 0   | 0   | 0   | 0   | 0   | 0   | 0   |
| Actinomyces                                  | 0   | 0   | 0   | 0   | 0   | 0   | 0   | 0   | 0   | 0   | 0   | 0   | 0   | 0   | 0   | 0   | 0   | 0   | 0   | 0   | 0   | 0   |
| Fusobacterium nucleatum/periodonticum        | 0   | 0   | 0   | 0   | 0   | 0   | 0   | 0   | 0   | 0   | 0   | 0   | 0   | 0   | 0   | 0   | 0   | 0   | 0   | 0   | 0   | 0   |
| Lactobacillus saerimneri                     | 0   | 0   | 0   | 0   | 0   | 0   | 0   | 0   | 0   | 0   | 0   | 0   | 0   | 0   | 0   | 0   | 0   | 0   | 0   | 0   | 0   | 0   |
| Actinomycetaceae                             | 0   | 0   | 0   | 0   | 0   | 0   | 0   | 0   | 0   | 0   | 0   | 0   | 0   | 0   | 0   | 0   | 0   | 0   | 0   | 0   | 0   | 0   |
| Dialister                                    | 0   | 0   | 0   | 0   | 0   | 0   | 0   | 0   | 0   | 0   | 0   | 0   | 0   | 0   | 0   | 0   | 0   | 0   | 0   | 0   | 0   | 0   |
| Neisseria mucosa/subflava                    | 0   | 0   | 0   | 0   | 0   | 0   | 0   | 0   | 0   | 0   | 0   | 0   | 0   | 0   | 0   | 0   | 0   | 0   | 0   | 0   | 0   | 0   |
| Paracoccus                                   | 0   | 0   | 0   | 0   | 0   | 0   | 0   | 0   | 0   | 0   | 0   | 0   | 0   | 0   | 0   | 0   | 0   | 0   | 0   | 0   | 0   | 0   |
| Acinetobacter haemolyticus/johnsonii         | 0   | 0   | 0   | 0   | 0   | 0   | 0   | 0   | 0   | 0   | 0   | 0   | 0   | 0   | 0   | 0   | 0   | 0   | 0   | 0   | 0   | 0   |
| Neisseria subflava                           | 0   | 0   | 0   | 0   | 0   | 0   | 0   | 0   | 0   | 0   | 0   | 0   | 0   | 0   | 0   | 0   | 0   | 0   | 0   | 0   | 0   | 0   |
| Acinetobacter proteolyticus                  | 0   | 0   | 0   | 0   | 0   | 0   | 0   | 0   | 0   | 0   | 0   | 0   | 0   | 0   | 0   | 0   | 0   | 0   | 0   | 0   | 0   | 0   |
| Dorea formicigenerans                        | 0   | 0   | 0   | 0   | 0   | 0   | 0   | 0   | 0   | 0   | 0   | 0   | 0   | 0   | 0   | 0   | 0   | 0   | 0   | 0   | 0   | 0   |
| Corynebacterium tuscaniense                  | 0   | 0   | 0   | 0   | 0   | 0   | 0   | 0   | 0   | 0   | 0   | 0   | 0   | 0   | 0   | 0   | 0   | 0   | 0   | 0   | 0   | 0   |
| Massiliomicrobiota timonensis                | 0   | 0   | 0   | 0   | 0   | 0   | 0   | 0   | 0   | 0   | 0   | 0   | 0   | 0   | 0   | 0   | 0   | 0   | 0   | 0   | 0   | 0   |
| Fusobacterium hwasookii                      | 0   | 0   | 0   | 0   | 0   | 0   | 0   | 0   | 0   | 0   | 0   | 0   | 0   | 0   | 0   | 0   | 0   | 0   | 0   | 0   | 0   | 0   |
| Pseudoglutamicibacter albus                  | 0   | 0   | 0   | 0   | 0   | 0   | 0   | 0   | 33  | 0   | 0   | 0   | 0   | 0   | 0   | 0   | 0   | 0   | 0   | 0   | 0   | 0   |
| Clostridiales Family XIII. Incertae Sedis    | 0   | 0   | 0   | 0   | 0   | 0   | 0   | 0   | 0   | 0   | 0   | 0   | 0   | 0   | 0   | 0   | 0   | 0   | 0   | 0   | 0   | 0   |
| Kocuria marina/rhizophila                    | 0   | 0   | 0   | 0   | 0   | 0   | 0   | 0   | 0   | 0   | 0   | 0   | 0   | 0   | 0   | 0   | 0   | 0   | 0   | 0   | 0   | 0   |
| Kocuria                                      | 0   | 0   | 0   | 0   | 0   | 0   | 0   | 0   | 0   | 0   | 0   | 0   | 0   | 0   | 0   | 0   | 0   | 0   | 0   | 0   | 0   | 0   |
| Alloprevotella rava                          | 0   | 0   | 0   | 0   | 0   | 0   | 0   | 0   | 0   | 0   | 0   | 0   | 0   | 0   | 0   | 0   | 0   | 0   | 0   | 0   | 0   | 0   |
| Staphylococcus pettenkoferi                  | 0   | 0   | 0   | 0   | 0   | 0   | 0   | 0   | 0   | 0   | 0   | 0   | 0   | 0   | 0   | 0   | 0   | 0   | 0   | 0   | 0   | 0   |
| Streptococcus pseudoporcinus                 | 0   | 0   | 0   | 0   | 0   | 0   | 0   | 0   | 0   | 0   | 0   | 0   | 0   | 0   | 0   | 0   | 0   | 0   | 0   | 0   | 0   | 0   |
| Kingella                                     | 0   | 0   | 0   | 0   | 0   | 0   | 0   | 0   | 0   | 0   | 0   | 0   | 0   | 0   | 0   | 0   | 0   | 0   | 0   | 0   | 0   | 0   |
| Eikenella                                    | 0   | 0   | 0   | 0   | 0   | 0   | 0   | 0   | 0   | 0   | 0   | 0   | 0   | 0   | 0   | 0   | 0   | 0   | 0   | 0   | 0   | 0   |
| Actinomyces odontolyticus                    | 0   | 0   | 0   | 0   | 0   | 0   | 0   | 0   | 0   | 0   | 0   | 0   | 0   | 0   | 0   | 0   | 0   | 0   | 0   | 0   | 0   | 0   |
| Corynebacterium sphenisci                    | 0   | 0   | 0   | 0   | 0   | 0   | 0   | 0   | 0   | 0   | 0   | 0   | 0   | 0   | 0   | 0   | 0   | 0   | 0   | 0   | 0   | 0   |
| Cutibacterium                                | 0   | 0   | 0   | 0   | 0   | 0   | 0   | 0   | 0   | 0   | 0   | 0   | 0   | 0   | 0   | 0   | 0   | 0   | 0   | 0   | 0   | 0   |
| Staphylococcus xylosum                       | 0   | 0   | 0   | 0   | 0   | 0   | 0   | 0   | 0   | 0   | 0   | 54  | 0   | 0   | 0   | 0   | 0   | 0   | 0   | 0   | 0   | 0   |
| Burkholderiales                              | 0   | 0   | 0   | 0   | 0   | 0   | 0   | 0   | 0   | 0   | 0   | 0   | 0   | 0   | 0   | 0   | 0   | 0   | 0   | 0   | 0   | 0   |
| Massiliomicrobiota/Mycoplasma                | 0   | 0   | 0   | 0   | 0   | 0   | 0   | 0   | 0   | 0   | 0   | 0   | 0   | 0   | 0   | 0   | 0   | 0   | 0   | 0   | 0   | 0   |
| Bacteroidales                                | 0   | 0   | 0   | 0   | 0   | 0   | 0   | 0   | 0   | 0   | 0   | 0   | 0   | 0   | 0   | 0   | 0   | 0   | 0   | 0   | 0   | 0   |
| Campylobacter fetus                          | 0   | 0   | 0   | 0   | 0   | 0   | 0   | 0   | 0   | 0   | 0   | 0   | 0   | 0   | 0   | 0   | 0   | 0   | 0   | 0   | 0   | 0   |
| Prevotella aurantiaca                        | 0   | 0   | 0   | 0   | 0   | 0   | 0   | 0   | 0   | 0   | 0   | 0   | 0   | 0   | 0   | 0   | 0   | 0   | 0   | 0   | 0   | 0   |
| Corynebacterium freneyi/xerosis              | 0   | 0   | 0   | 0   | 0   | 0   | 0   | 0   | 0   | 0   | 0   | 0   | 0   | 0   | 0   | 0   | 0   | 0   | 0   | 0   | 0   | 0   |
| Aerococcaceae                                | 0   | 0   | 0   | 0   | 0   | 0   | 0   | 0   | 0   | 0   | 0   | 0   | 0   | 0   | 0   | 0   | 0   | 0   | 0   | 0   | 0   | 0   |
| Moraxella lacunata                           | 0   | 0   | 0   | 0   | 0   | 0   | 0   | 0   | 0   | 0   | 0   | 0   | 0   | 0   | 0   | 0   | 0   | 0   | 0   | 0   | 0   | 0   |
| Corynebacterium accolens/macginleyi          | 0   | 0   | 0   | 0   | 0   | 0   | 0   | 0   | 0   | 0   | 0   | 0   | 0   | 0   | 0   | 0   | 0   | 0   | 0   | 0   | 0   | 0   |
| Massilia aurea                               | 0   | 0   | 0   | 0   | 0   | 0   | 0   | 0   | 0   | 0   | 0   | 0   | 0   | 0   | 0   | 0   | 0   | 0   | 0   | 0   | 0   | 0   |
| Corynebacterium casei                        | 0   | 0   | 0   | 0   | 0   | 0   | 0   | 0   | 35  | 0   | 0   | 0   | 0   | 0   | 0   | 0   | 0   | 0   | 0   | 0   | 0   | 0   |
| Helcococcus sueciensis                       | 0   | 0   | 0   | 0   | 0   | 0   | 0   | 0   | 0   | 0   | 0   | 0   | 0   | 0   | 0   | 0   | 0   | 0   | 0   | 0   | 0   | 0   |
| Lactobacillus casei/rhannosus                | 0   | 0   | 0   | 0   | 0   | 0   | 0   | 0   | 0   | 0   | 0   | 0   | 0   | 0   | 0   | 0   | 0   | 0   | 0   | 0   | 0   | 0   |
| Holdemanella biformis                        | 0   | 0   | 0   | 0   | 0   | 0   | 0   | 0   | 0   | 0   | 0   | 0   | 0   | 0   | 0   | 0   | 0   | 0   | 0   | 0   | 0   | 0   |
| Pelistega                                    | 0   | 0   | 0   | 0   | 0   | 0   | 0   | 0   | 0   | 0   | 0   | 0   | 0   | 0   | 0   | 0   | 0   | 0   | 0   | 0   | 0   | 0   |
| Actinomyces massiliensis                     | 0   | 0   | 0   | 0   | 0   | 0   | 0   | 0   | 0   | 0   | 0   | 0   | 0   | 0   | 0   | 0   | 0   | 0   | 0   | 0   | 0   | 0   |
| Massilia                                     | 0   | 0   | 0   | 0   | 0   | 0   | 0   | 0   | 0   | 0   | 0   | 0   | 0   | 0   | 0   | 0   | 0   | 0   | 0   | 0   | 0   | 0   |
| Staphylococcus equorum/xylosum               | 0   | 0   | 0   | 0   | 0   | 0   | 0   | 0   | 0   | 0   | 0   | 0   | 0   | 0   | 0   | 0   | 0   | 0   | 0   | 0   | 0   | 0   |
| Streptococcus                                | 0   | 0   | 0   | 0   | 0   | 0   | 0   | 0   | 0   | 0   | 0   | 0   | 0   | 0   | 0   | 0   | 0   | 0   | 0   | 0   | 0   | 0   |
| Cutibacterium avidum                         | 0   | 0   | 0   | 0   | 0   | 0   | 0   | 0   | 0   | 0   | 0   | 0   | 0   | 0   | 0   | 0   | 0   | 0   | 0   | 0   | 0   | 0   |

# Samples S81 - S111

| Species                                              | S81   | S82   | S84   | S85   | S86   | S87   | S88  | S90  | S91  | S92  | S94   | S95  | S96   | S97   | S100  | S103  | S104  | S106  | S108  | S109 | S110  | S111  |
|------------------------------------------------------|-------|-------|-------|-------|-------|-------|------|------|------|------|-------|------|-------|-------|-------|-------|-------|-------|-------|------|-------|-------|
| Streptococcus mitis group                            | 28    | 6029  | 12243 | 0     | 10529 | 0     | 3479 | 0    | 5368 | 71   | 0     | 0    | 12240 | 0     | 0     | 0     | 13862 | 8341  | 11253 | 0    | 41457 | 0     |
| Lactobacillus iners                                  | 61    | 5963  | 0     | 29543 | 0     | 30191 | 958  | 0    | 0    | 0    | 0     | 0    | 0     | 8298  | 0     | 1410  | 0     | 306   | 0     | 0    | 0     | 45769 |
| Gardnerella vaginalis                                | 0     | 11111 | 0     | 0     | 319   | 14565 | 0    | 0    | 0    | 0    | 1376  | 5467 | 0     | 29491 | 18722 | 20664 | 0     | 2445  | 9183  | 0    | 141   | 5138  |
| Corynebacterium pseudogenitalium/tuberculoostearicum | 0     | 767   | 0     | 511   | 108   | 0     | 1441 | 968  | 861  | 0    | 87    | 0    | 214   | 46    | 96    | 152   | 705   | 172   | 60    | 1608 | 50    | 37    |
| Streptococcus agalactiae                             | 0     | 0     | 0     | 0     | 0     | 1993  | 270  | 9206 | 0    | 0    | 0     | 0    | 0     | 0     | 0     | 0     | 0     | 288   | 0     | 0    | 0     | 0     |
| Veillonella montpellierensis                         | 0     | 0     | 3336  | 0     | 0     | 0     | 0    | 0    | 0    | 0    | 13006 | 0    | 31292 | 14380 | 5952  | 0     | 0     | 10004 | 0     | 268  | 0     | 0     |
| Streptococcus anginosus                              | 0     | 0     | 0     | 0     | 0     | 0     | 0    | 0    | 0    | 4016 | 0     | 0    | 0     | 5589  | 3289  | 269   | 0     | 2626  | 713   | 0    | 5320  | 0     |
| Chlamydia trachomatis                                | 0     | 0     | 0     | 0     | 0     | 0     | 0    | 0    | 0    | 0    | 0     | 0    | 0     | 0     | 0     | 0     | 0     | 0     | 0     | 0    | 0     | 0     |
| Haemophilus parainfluenzae                           | 0     | 0     | 154   | 0     | 7511  | 0     | 0    | 0    | 0    | 57   | 0     | 0    | 0     | 60    | 0     | 0     | 0     | 252   | 0     | 0    | 186   | 0     |
| Finegoldia magna                                     | 0     | 463   | 78    | 276   | 0     | 965   | 0    | 0    | 0    | 905  | 0     | 0    | 0     | 1237  | 112   | 0     | 0     | 2189  | 1217  | 122  | 322   | 91    |
| Peptoniphilus asaccharolyticus/grossensis/harei      | 0     | 1258  | 34    | 0     | 0     | 0     | 0    | 0    | 0    | 3580 | 324   | 0    | 0     | 1011  | 183   | 194   | 54    | 749   | 897   | 0    | 2105  | 32    |
| Sneathia amnii                                       | 0     | 0     | 0     | 0     | 0     | 0     | 0    | 0    | 0    | 0    | 16511 | 0    | 3933  | 15978 | 2145  | 0     | 255   | 285   | 0     | 2819 | 0     | 0     |
| Staphylococcus caprae/cohnii/epidermidis             | 0     | 0     | 62    | 101   | 297   | 58    | 288  | 1339 | 33   | 0    | 71    | 0    | 142   | 0     | 27    | 40    | 199   | 0     | 57    | 359  | 71    | 0     |
| Gemella haemolysans/taiwanensis                      | 0     | 1753  | 2271  | 0     | 690   | 0     | 255  | 0    | 0    | 0    | 608   | 0    | 0     | 0     | 0     | 0     | 1775  | 7192  | 0     | 0    | 0     | 0     |
| Sneathia sanguinogens                                | 0     | 0     | 0     | 0     | 0     | 0     | 0    | 0    | 0    | 0    | 0     | 0    | 0     | 34305 | 2519  | 29372 | 0     | 147   | 0     | 0    | 135   | 0     |
| Mycoplasma genitalium                                | 0     | 0     | 0     | 0     | 0     | 0     | 0    | 0    | 0    | 0    | 0     | 0    | 0     | 0     | 0     | 0     | 0     | 340   | 0     | 0    | 0     | 0     |
| Mycoplasma penetrans                                 | 0     | 0     | 0     | 0     | 0     | 0     | 0    | 0    | 0    | 0    | 0     | 0    | 0     | 0     | 0     | 0     | 0     | 0     | 0     | 0    | 0     | 0     |
| Haemophilus haemolyticus/quentini                    | 0     | 0     | 0     | 0     | 0     | 0     | 997  | 0    | 0    | 0    | 0     | 0    | 0     | 0     | 0     | 0     | 34    | 0     | 0     | 0    | 0     | 0     |
| Corynebacterium pyrubiciproducens                    | 0     | 0     | 65    | 0     | 448   | 0     | 226  | 6599 | 235  | 183  | 0     | 0    | 0     | 524   | 27    | 42    | 0     | 81    | 0     | 0    | 0     | 0     |
| Anaerococcus prevotii/tetradicus                     | 0     | 0     | 0     | 0     | 0     | 0     | 0    | 0    | 0    | 0    | 0     | 0    | 0     | 349   | 160   | 310   | 71    | 74    | 302   | 0    | 58    | 50    |
| Haemophilus influenzae                               | 57269 | 0     | 0     | 0     | 0     | 0     | 0    | 0    | 0    | 0    | 0     | 0    | 0     | 0     | 0     | 0     | 0     | 0     | 0     | 589  | 0     | 0     |
| Staphylococcus epidermidis/hominis                   | 0     | 147   | 0     | 37    | 0     | 0     | 0    | 382  | 87   | 0    | 0     | 0    | 64    | 0     | 0     | 0     | 0     | 0     | 0     | 47   | 96    | 0     |
| Atopobium vaginae                                    | 0     | 0     | 0     | 0     | 0     | 1398  | 0    | 0    | 0    | 0    | 0     | 2623 | 0     | 960   | 14925 | 1453  | 0     | 805   | 8448  | 0    | 0     | 0     |
| Ureaplasma parvum/urealyticum                        | 0     | 721   | 0     | 0     | 617   | 751   | 270  | 0    | 0    | 0    | 219   | 277  | 0     | 1053  | 2254  | 1108  | 901   | 0     | 2101  | 0    | 0     | 1419  |
| Prevotella timonensis                                | 0     | 0     | 0     | 0     | 0     | 0     | 0    | 0    | 0    | 0    | 243   | 352  | 0     | 650   | 193   | 789   | 0     | 241   | 947   | 0    | 2006  | 0     |
| Fenollaria massiliensis/timonensis                   | 0     | 0     | 0     | 0     | 0     | 0     | 0    | 0    | 0    | 0    | 0     | 0    | 0     | 0     | 0     | 0     | 0     | 48    | 0     | 0    | 0     | 0     |
| Anaerococcus                                         | 0     | 0     | 30    | 0     | 0     | 0     | 0    | 95   | 3290 | 0    | 0     | 0    | 0     | 1534  | 0     | 0     | 0     | 66    | 25    | 0    | 484   | 0     |
| Corynebacterium coyleae                              | 0     | 0     | 0     | 0     | 0     | 0     | 0    | 0    | 0    | 0    | 0     | 0    | 0     | 0     | 0     | 0     | 189   | 121   | 0     | 1636 | 0     | 0     |
| Prevotella bivia                                     | 0     | 0     | 0     | 0     | 119   | 0     | 0    | 0    | 0    | 1541 | 350   | 3795 | 0     | 0     | 0     | 188   | 0     | 270   | 0     | 0    | 232   | 0     |
| Prevotella melaninogenica                            | 0     | 0     | 0     | 0     | 0     | 0     | 0    | 0    | 0    | 0    | 0     | 0    | 0     | 0     | 0     | 0     | 0     | 0     | 0     | 0    | 0     | 0     |
| Corynebacterium aurimucosum/minusissimum/singulare   | 0     | 39    | 0     | 98    | 0     | 0     | 907  | 148  | 942  | 0    | 28    | 0    | 0     | 0     | 0     | 0     | 0     | 0     | 0     | 776  | 0     | 33    |
| Staphylococcus aureus                                | 0     | 0     | 0     | 0     | 0     | 0     | 0    | 0    | 0    | 0    | 0     | 0    | 0     | 0     | 0     | 0     | 0     | 0     | 0     | 0    | 0     | 0     |
| Anaerococcus lactolyticus                            | 0     | 31    | 0     | 0     | 0     | 0     | 0    | 0    | 0    | 0    | 1061  | 0    | 0     | 0     | 265   | 0     | 0     | 0     | 558   | 0    | 13816 | 0     |
| Aerococcus christensenii                             | 0     | 2150  | 0     | 0     | 0     | 0     | 0    | 0    | 0    | 210  | 0     | 765  | 0     | 2394  | 4616  | 2209  | 0     | 39    | 2573  | 0    | 402   | 0     |
| Corynebacterium glucuronolyticum                     | 0     | 0     | 0     | 35    | 0     | 0     | 0    | 0    | 0    | 0    | 0     | 0    | 32    | 0     | 0     | 0     | 0     | 0     | 205   | 0    | 0     | 0     |
| Veillonella atypica                                  | 0     | 0     | 0     | 0     | 0     | 0     | 0    | 0    | 0    | 0    | 0     | 0    | 5168  | 0     | 0     | 0     | 0     | 105   | 0     | 0    | 0     | 0     |
| Veillonella                                          | 0     | 0     | 0     | 0     | 0     | 0     | 0    | 0    | 0    | 0    | 0     | 0    | 0     | 0     | 0     | 0     | 0     | 0     | 0     | 0    | 0     | 0     |
| Mycoplasma hominis                                   | 0     | 0     | 0     | 0     | 0     | 0     | 0    | 0    | 0    | 0    | 0     | 0    | 0     | 0     | 0     | 2576  | 0     | 0     | 606   | 0    | 0     | 0     |
| Granulicatella elegans                               | 0     | 0     | 0     | 0     | 0     | 0     | 0    | 0    | 0    | 0    | 0     | 0    | 0     | 1693  | 0     | 0     | 1188  | 2287  | 0     | 0    | 0     | 0     |
| Ezakiella                                            | 0     | 0     | 0     | 0     | 0     | 0     | 0    | 0    | 0    | 0    | 0     | 0    | 0     | 0     | 0     | 0     | 0     | 0     | 0     | 0    | 0     | 0     |
| Shigella/Escherichia                                 | 0     | 0     | 64    | 0     | 0     | 0     | 0    | 0    | 0    | 0    | 0     | 0    | 0     | 0     | 0     | 0     | 0     | 0     | 0     | 0    | 0     | 0     |
| Streptococcus salivarius                             | 0     | 0     | 0     | 0     | 0     | 0     | 0    | 0    | 0    | 0    | 0     | 0    | 0     | 0     | 0     | 0     | 0     | 274   | 0     | 0    | 0     | 0     |
| Actinomyces turicensis                               | 0     | 0     | 0     | 0     | 0     | 0     | 0    | 0    | 0    | 0    | 74    | 0    | 0     | 228   | 0     | 93    | 0     | 123   | 27    | 0    | 1105  | 0     |
| Prevotella corporis                                  | 0     | 0     | 0     | 0     | 0     | 0     | 0    | 0    | 0    | 0    | 0     | 0    | 0     | 0     | 0     | 0     | 0     | 0     | 0     | 0    | 0     | 0     |
| Corynebacterium simulans                             | 0     | 0     | 0     | 0     | 0     | 0     | 0    | 0    | 0    | 0    | 0     | 0    | 0     | 0     | 0     | 0     | 178   | 7477  | 47    | 345  | 0     | 0     |
| Fusobacterium equinum                                | 0     | 0     | 0     | 0     | 0     | 0     | 0    | 0    | 0    | 0    | 0     | 0    | 0     | 0     | 0     | 0     | 0     | 0     | 0     | 0    | 0     | 0     |
| Corynebacterium                                      | 0     | 151   | 0     | 0     | 0     | 0     | 0    | 79   | 0    | 0    | 0     | 0    | 0     | 0     | 0     | 0     | 0     | 154   | 0     | 38   | 0     | 0     |
| Staphylococcus haemolyticus                          | 0     | 0     | 225   | 0     | 0     | 0     | 92   | 1042 | 381  | 0    | 0     | 0    | 12023 | 0     | 0     | 0     | 263   | 248   | 0     | 82   | 0     | 0     |
| Gemella asaccharolytica                              | 0     | 0     | 0     | 0     | 0     | 0     | 0    | 0    | 0    | 0    | 0     | 1724 | 0     | 2909  | 4170  | 1439  | 0     | 315   | 1072  | 0    | 0     | 0     |
| Peptoniphilus                                        | 0     | 0     | 0     | 0     | 0     | 0     | 0    | 0    | 0    | 0    | 0     | 0    | 0     | 0     | 0     | 0     | 0     | 0     | 140   | 0    | 41    | 0     |
| Corynebacterium hadale/imitans                       | 0     | 0     | 0     | 0     | 0     | 0     | 0    | 0    | 386  | 0    | 0     | 0    | 0     | 0     | 0     | 0     | 48    | 0     | 0     | 0    | 0     | 0     |
| Eggerthella sp. type 1 (species)                     | 0     | 0     | 0     | 0     | 0     | 0     | 0    | 0    | 0    | 0    | 0     | 910  | 0     | 0     | 468   | 794   | 0     | 171   | 250   | 0    | 0     | 0     |
| Prevotella disiens                                   | 0     | 0     | 0     | 0     | 0     | 0     | 0    | 0    | 0    | 0    | 0     | 0    | 0     | 61    | 0     | 0     | 0     | 53    | 0     | 0    | 698   | 0     |
| Peptoniphilus lacrimalis                             | 0     | 0     | 0     | 0     | 0     | 0     | 0    | 0    | 0    | 0    | 0     | 0    | 0     | 0     | 0     | 0     | 0     | 0     | 0     | 0    | 0     | 0     |
| Anaerococcus vaginalis                               | 0     | 180   | 0     | 0     | 0     | 0     | 0    | 0    | 0    | 1392 | 0     | 0    | 0     | 0     | 32    | 0     | 0     | 29    | 0     | 0    | 378   | 0     |
| Facklamia hominis                                    | 0     | 0     | 0     | 0     | 0     | 0     | 0    | 0    | 0    | 0    | 0     | 0    | 0     | 56    | 0     | 0     | 0     | 0     | 0     | 0    | 0     | 0     |
| Prevotella amnii                                     | 0     | 0     | 0     | 0     | 0     | 0     | 0    | 0    | 0    | 0    | 0     | 0    | 0     | 7705  | 32545 | 7200  | 0     | 46    | 2711  | 0    | 0     | 0     |
| Campylobacter ureolyticus                            | 0     | 0     | 0     | 0     | 0     | 0     | 0    | 0    | 0    | 711  | 134   | 0    | 0     | 0     | 45    | 0     | 0     | 0     | 0     | 0    | 0     | 0     |
| BVAB2 (species)                                      | 0     | 0     | 0     | 0     | 0     | 0     | 0    | 0    | 0    | 0    | 0     | 0    | 0     | 2360  | 3046  | 332   | 0     | 220   | 0     | 0    | 0     | 0     |
| Haemophilus                                          | 0     | 0     | 0     | 0     | 0     | 0     | 0    | 0    | 0    | 0    | 0     | 0    | 0     | 0     | 0     | 0     | 0     | 38    | 0     | 0    | 0     | 0     |
| Anaerococcus hydrogenalis/rubeifantais               | 0     | 0     | 0     | 0     | 0     | 0     | 0    | 0    | 0    | 46   | 0     | 0    | 0     | 0     | 0     | 0     | 0     | 0     | 81    | 0    | 0     | 0     |
| Anaerococcus mediterraneensis                        | 0     | 782   | 0     | 0     | 0     | 0     | 0    | 0    | 0    | 0    | 0     | 0    | 0     | 63    | 0     | 0     | 0     | 0     | 527   | 0    | 0     | 0     |
| Dialister sp. type 2                                 | 0     | 0     | 0     | 0     | 0     | 0     | 0    | 0    | 0    | 0    | 0     | 0    | 0     | 0     | 192   | 167   | 0     | 86    | 226   | 0    | 0     | 0     |
| Dialister microaerophilus                            | 0     | 0     | 0     | 0     | 0     | 0     | 0    | 0    | 0    | 0    | 48    | 351  | 0     | 307   | 486   | 386   | 0     | 304   | 215   | 0    | 954   | 0     |
| Corynebacterium amycolatum                           | 0     | 0     | 0     | 0     | 0     | 0     | 0    | 0    | 0    | 0    | 0     | 0    | 0     | 0     | 0     | 0     | 0     | 0     | 0     | 0    | 0     | 0     |
| Ureaplasma                                           | 0     | 0     | 0     | 0     | 0     | 566   | 181  |      |      |      |       |      |       |       |       |       |       |       |       |      |       |       |



Samples S81 - S111

| Species                                                | S81 | S82 | S84 | S85 | S86 | S87 | S88 | S90 | S91 | S92  | S94 | S95 | S96 | S97 | S100 | S103 | S104 | S106 | S108 | S109 | S110 | S111 |
|--------------------------------------------------------|-----|-----|-----|-----|-----|-----|-----|-----|-----|------|-----|-----|-----|-----|------|------|------|------|------|------|------|------|
| Peptoniphilus rhinitidis                               | 0   | 0   | 0   | 0   | 0   | 0   | 0   | 0   | 0   | 0    | 0   | 0   | 0   | 0   | 0    | 0    | 0    | 0    | 0    | 0    | 0    | 0    |
| Anaerococcus senegalensis                              | 0   | 0   | 0   | 160 | 0   | 0   | 0   | 0   | 0   | 0    | 0   | 0   | 46  | 0   | 0    | 0    | 0    | 0    | 0    | 0    | 0    | 0    |
| Peptostreptococcus anaerobius                          | 0   | 0   | 0   | 0   | 0   | 0   | 0   | 0   | 0   | 0    | 0   | 0   | 0   | 0   | 0    | 0    | 142  | 58   | 0    | 0    | 0    | 0    |
| Dialister propionificiens                              | 0   | 0   | 0   | 0   | 0   | 0   | 0   | 0   | 0   | 0    | 54  | 0   | 0   | 0   | 0    | 0    | 94   | 0    | 0    | 0    | 0    | 0    |
| Peptoniphilus harei                                    | 0   | 0   | 0   | 0   | 0   | 0   | 0   | 0   | 0   | 0    | 0   | 0   | 0   | 0   | 0    | 0    | 0    | 0    | 0    | 0    | 0    | 0    |
| Negativicoccus succinicivorans                         | 0   | 0   | 0   | 0   | 0   | 0   | 0   | 0   | 0   | 0    | 0   | 0   | 94  | 0   | 0    | 0    | 0    | 0    | 0    | 0    | 0    | 0    |
| Parvimonas micra                                       | 0   | 0   | 0   | 0   | 0   | 0   | 0   | 0   | 0   | 0    | 0   | 0   | 0   | 0   | 0    | 0    | 91   | 0    | 0    | 0    | 0    | 0    |
| Actinomyces ihumii                                     | 0   | 0   | 0   | 0   | 0   | 0   | 0   | 0   | 0   | 1061 | 0   | 0   | 0   | 407 | 0    | 0    | 0    | 0    | 0    | 0    | 0    | 0    |
| Actinotignum timonense                                 | 0   | 0   | 0   | 0   | 0   | 0   | 0   | 0   | 0   | 0    | 0   | 0   | 80  | 0   | 0    | 0    | 0    | 0    | 0    | 0    | 0    | 0    |
| Fenollaria                                             | 0   | 0   | 0   | 0   | 0   | 0   | 0   | 0   | 0   | 0    | 0   | 0   | 0   | 0   | 0    | 0    | 0    | 0    | 0    | 0    | 0    | 0    |
| Fusobacterium massiliense                              | 0   | 0   | 0   | 0   | 0   | 0   | 0   | 0   | 0   | 0    | 0   | 0   | 0   | 0   | 5460 | 0    | 0    | 0    | 0    | 0    | 0    | 0    |
| Actinobaculum massiliense                              | 0   | 0   | 0   | 0   | 0   | 0   | 0   | 0   | 0   | 0    | 0   | 0   | 0   | 0   | 0    | 0    | 0    | 0    | 0    | 0    | 7118 | 0    |
| Peptoniphilus coxii                                    | 0   | 0   | 0   | 0   | 0   | 0   | 0   | 0   | 0   | 594  | 0   | 0   | 0   | 0   | 0    | 0    | 0    | 0    | 0    | 0    | 0    | 0    |
| Staphylococcus lugdunensis                             | 0   | 0   | 0   | 0   | 0   | 0   | 0   | 226 | 0   | 0    | 0   | 0   | 0   | 0   | 0    | 0    | 0    | 0    | 0    | 0    | 217  | 0    |
| Dermabacter                                            | 0   | 0   | 0   | 0   | 0   | 0   | 0   | 63  | 0   | 0    | 0   | 0   | 0   | 0   | 0    | 0    | 0    | 0    | 0    | 0    | 0    | 0    |
| Alloscardovia omnicolens                               | 0   | 0   | 0   | 0   | 0   | 0   | 0   | 0   | 0   | 0    | 0   | 0   | 0   | 0   | 0    | 0    | 0    | 0    | 0    | 0    | 0    | 0    |
| Varibaculum cambriense                                 | 0   | 0   | 0   | 0   | 0   | 0   | 0   | 0   | 0   | 423  | 0   | 0   | 0   | 660 | 0    | 0    | 0    | 0    | 0    | 0    | 0    | 0    |
| Streptococcus urinialis                                | 0   | 0   | 111 | 0   | 0   | 0   | 0   | 0   | 0   | 0    | 0   | 0   | 0   | 0   | 0    | 0    | 0    | 0    | 0    | 0    | 0    | 0    |
| Corynebacterium appendicis                             | 0   | 0   | 0   | 0   | 0   | 0   | 0   | 0   | 0   | 0    | 0   | 0   | 0   | 0   | 0    | 0    | 0    | 0    | 0    | 0    | 0    | 0    |
| Actinotignum schaalii                                  | 0   | 0   | 0   | 0   | 0   | 0   | 0   | 0   | 0   | 0    | 0   | 0   | 0   | 0   | 0    | 26   | 0    | 0    | 0    | 0    | 0    | 0    |
| Corynebacterium timonense                              | 0   | 90  | 0   | 0   | 0   | 0   | 0   | 0   | 622 | 0    | 0   | 0   | 0   | 0   | 31   | 0    | 0    | 0    | 44   | 0    | 0    | 0    |
| Gemella                                                | 0   | 0   | 0   | 0   | 0   | 0   | 0   | 0   | 0   | 0    | 0   | 0   | 0   | 0   | 0    | 0    | 0    | 0    | 0    | 0    | 0    | 0    |
| Klebsiella aerogenes/Enterobacter asburiae             | 0   | 0   | 0   | 0   | 0   | 0   | 0   | 0   | 0   | 0    | 0   | 0   | 0   | 0   | 0    | 0    | 0    | 0    | 0    | 0    | 0    | 0    |
| Fusobacterium periodonticum                            | 0   | 0   | 0   | 0   | 0   | 0   | 0   | 0   | 0   | 0    | 0   | 0   | 0   | 0   | 0    | 0    | 0    | 0    | 0    | 0    | 2290 | 0    |
| Veillonella dispar                                     | 0   | 0   | 0   | 0   | 0   | 0   | 0   | 0   | 0   | 0    | 0   | 0   | 0   | 0   | 0    | 0    | 96   | 0    | 0    | 0    | 0    | 0    |
| Prevotella colorans                                    | 0   | 0   | 0   | 0   | 0   | 0   | 0   | 0   | 0   | 0    | 0   | 0   | 0   | 0   | 0    | 0    | 0    | 0    | 0    | 0    | 0    | 0    |
| Candidatus Peptoniphilus massiliensis                  | 0   | 0   | 0   | 0   | 0   | 0   | 0   | 0   | 0   | 0    | 0   | 0   | 0   | 0   | 0    | 0    | 0    | 0    | 0    | 0    | 0    | 0    |
| Eremococcus                                            | 0   | 0   | 0   | 0   | 0   | 0   | 0   | 0   | 115 | 0    | 0   | 0   | 0   | 0   | 0    | 0    | 0    | 0    | 0    | 0    | 0    | 0    |
| Varibaculum anthropi                                   | 0   | 0   | 0   | 0   | 0   | 0   | 0   | 0   | 0   | 0    | 0   | 0   | 0   | 0   | 0    | 0    | 0    | 0    | 0    | 0    | 0    | 0    |
| Propionimicrobium lymphophilum                         | 0   | 0   | 0   | 0   | 0   | 0   | 0   | 0   | 0   | 2591 | 0   | 0   | 0   | 0   | 0    | 0    | 0    | 0    | 39   | 0    | 1647 | 0    |
| Streptococcus dysgalactiae                             | 0   | 0   | 0   | 0   | 0   | 0   | 0   | 0   | 0   | 0    | 0   | 0   | 0   | 0   | 0    | 0    | 0    | 0    | 0    | 0    | 0    | 0    |
| Negativicoccus                                         | 0   | 0   | 0   | 0   | 0   | 0   | 0   | 0   | 0   | 0    | 0   | 0   | 0   | 0   | 0    | 0    | 0    | 0    | 0    | 0    | 0    | 0    |
| Porphyromonas somerae                                  | 0   | 0   | 0   | 0   | 0   | 0   | 0   | 0   | 0   | 0    | 0   | 0   | 0   | 0   | 0    | 0    | 0    | 0    | 0    | 0    | 0    | 0    |
| Corynebacterium jeikeium                               | 0   | 42  | 0   | 0   | 0   | 0   | 999 | 0   | 0   | 0    | 0   | 0   | 0   | 0   | 0    | 0    | 0    | 0    | 0    | 0    | 0    | 0    |
| Mobiluncus curtisii                                    | 0   | 0   | 0   | 0   | 0   | 0   | 0   | 0   | 0   | 0    | 0   | 0   | 0   | 0   | 0    | 0    | 0    | 0    | 0    | 0    | 0    | 0    |
| Porphyromonas uenonis                                  | 0   | 0   | 0   | 0   | 0   | 0   | 0   | 0   | 0   | 0    | 0   | 0   | 0   | 0   | 0    | 0    | 0    | 0    | 28   | 0    | 138  | 0    |
| Aerococcus urinae                                      | 0   | 0   | 0   | 0   | 0   | 0   | 0   | 0   | 0   | 0    | 0   | 0   | 29  | 0   | 0    | 0    | 0    | 53   | 0    | 0    | 0    | 0    |
| Corynebacterium mycetoides                             | 0   | 179 | 0   | 0   | 0   | 0   | 0   | 0   | 0   | 0    | 0   | 0   | 0   | 0   | 0    | 0    | 80   | 0    | 0    | 0    | 0    | 0    |
| Cutibacterium acnes                                    | 0   | 0   | 0   | 0   | 0   | 0   | 0   | 0   | 0   | 0    | 0   | 0   | 0   | 0   | 0    | 0    | 0    | 0    | 0    | 0    | 0    | 0    |
| Urinacoccus massiliensis                               | 0   | 0   | 0   | 0   | 0   | 0   | 0   | 0   | 0   | 0    | 0   | 0   | 68  | 0   | 0    | 0    | 0    | 0    | 0    | 0    | 0    | 0    |
| Campylobacter hominis                                  | 0   | 0   | 0   | 0   | 0   | 0   | 0   | 0   | 0   | 0    | 0   | 0   | 0   | 0   | 0    | 0    | 0    | 0    | 0    | 0    | 0    | 0    |
| Staphylococcus capitis/caprae                          | 0   | 0   | 0   | 0   | 0   | 0   | 0   | 0   | 0   | 0    | 0   | 0   | 0   | 0   | 0    | 0    | 129  | 0    | 0    | 169  | 0    | 0    |
| Sneathia                                               | 0   | 0   | 0   | 0   | 0   | 0   | 0   | 0   | 0   | 0    | 0   | 0   | 0   | 0   | 0    | 0    | 0    | 0    | 0    | 0    | 56   | 0    |
| Prevotella jejuni                                      | 0   | 0   | 0   | 0   | 0   | 0   | 0   | 0   | 0   | 0    | 0   | 0   | 0   | 0   | 0    | 0    | 0    | 0    | 0    | 0    | 0    | 0    |
| Varibaculum                                            | 0   | 0   | 0   | 0   | 0   | 0   | 0   | 0   | 0   | 0    | 0   | 0   | 0   | 0   | 0    | 0    | 0    | 0    | 0    | 0    | 0    | 0    |
| Corynebacterium striatum                               | 0   | 0   | 0   | 0   | 0   | 0   | 0   | 0   | 0   | 0    | 0   | 0   | 0   | 0   | 0    | 0    | 0    | 0    | 0    | 0    | 3771 | 0    |
| Jonquetella anthropi                                   | 0   | 0   | 0   | 0   | 0   | 0   | 0   | 0   | 0   | 0    | 0   | 0   | 0   | 0   | 0    | 0    | 0    | 0    | 0    | 0    | 0    | 0    |
| Peptoniphilus koenoenariae                             | 0   | 0   | 0   | 0   | 0   | 0   | 0   | 0   | 0   | 0    | 0   | 0   | 0   | 0   | 0    | 0    | 0    | 0    | 0    | 0    | 0    | 0    |
| Bifidobacterium longum                                 | 0   | 0   | 0   | 0   | 0   | 0   | 0   | 0   | 0   | 0    | 815 | 0   | 0   | 0   | 0    | 0    | 0    | 0    | 0    | 0    | 0    | 0    |
| Helicobacter                                           | 0   | 0   | 0   | 0   | 0   | 0   | 0   | 0   | 0   | 0    | 0   | 0   | 0   | 0   | 0    | 0    | 0    | 0    | 0    | 0    | 0    | 0    |
| Lawsonella clevelandensis                              | 0   | 0   | 0   | 0   | 0   | 0   | 0   | 0   | 0   | 0    | 0   | 0   | 0   | 0   | 0    | 0    | 0    | 0    | 0    | 0    | 776  | 0    |
| Escherichia coli/fergusonii                            | 0   | 0   | 0   | 0   | 0   | 0   | 0   | 0   | 0   | 0    | 0   | 0   | 0   | 0   | 0    | 0    | 0    | 0    | 0    | 0    | 0    | 0    |
| Fusobacterium nucleatum                                | 0   | 0   | 0   | 0   | 0   | 0   | 0   | 0   | 0   | 0    | 0   | 0   | 0   | 0   | 0    | 0    | 625  | 358  | 0    | 4133 | 0    | 0    |
| Porphyromonas asaccharolytica                          | 0   | 0   | 0   | 0   | 0   | 0   | 0   | 0   | 0   | 0    | 0   | 0   | 0   | 0   | 0    | 0    | 0    | 0    | 0    | 0    | 0    | 0    |
| Anaerococcus octavius                                  | 0   | 0   | 0   | 0   | 0   | 0   | 0   | 59  | 0   | 0    | 0   | 0   | 0   | 0   | 0    | 0    | 0    | 0    | 0    | 0    | 0    | 0    |
| Fusobacterium                                          | 0   | 0   | 0   | 0   | 0   | 0   | 0   | 0   | 0   | 0    | 0   | 0   | 0   | 0   | 0    | 0    | 0    | 0    | 0    | 0    | 0    | 0    |
| Corynebacterium phoceense                              | 0   | 0   | 0   | 0   | 0   | 0   | 0   | 0   | 0   | 0    | 0   | 0   | 0   | 0   | 0    | 0    | 0    | 0    | 0    | 0    | 0    | 0    |
| Ruminococcus                                           | 0   | 0   | 0   | 0   | 0   | 0   | 0   | 0   | 0   | 0    | 0   | 0   | 0   | 0   | 0    | 0    | 0    | 92   | 0    | 0    | 0    | 0    |
| Arcanobacterium                                        | 0   | 0   | 0   | 0   | 0   | 0   | 0   | 0   | 0   | 0    | 0   | 0   | 0   | 0   | 0    | 0    | 0    | 0    | 0    | 0    | 0    | 0    |
| Khoudiadiopia                                          | 0   | 0   | 0   | 0   | 0   | 0   | 0   | 0   | 0   | 0    | 0   | 0   | 0   | 0   | 0    | 0    | 32   | 0    | 0    | 0    | 0    | 0    |
| Atopobium deltae                                       | 0   | 0   | 0   | 0   | 0   | 0   | 0   | 0   | 0   | 0    | 0   | 0   | 0   | 0   | 0    | 0    | 0    | 0    | 0    | 0    | 0    | 0    |
| Haemophilus paraaerolyticus                            | 0   | 0   | 0   | 0   | 0   | 0   | 0   | 0   | 0   | 0    | 0   | 0   | 0   | 0   | 0    | 0    | 0    | 0    | 0    | 0    | 0    | 0    |
| Howardella                                             | 0   | 0   | 0   | 0   | 0   | 0   | 0   | 0   | 0   | 0    | 0   | 0   | 0   | 0   | 0    | 0    | 0    | 0    | 0    | 0    | 443  | 0    |
| Prevotella buccalis                                    | 0   | 0   | 0   | 0   | 0   | 0   | 0   | 0   | 0   | 0    | 0   | 0   | 93  | 103 | 0    | 0    | 27   | 51   | 0    | 598  | 0    | 0    |
| Corynebacterium auris                                  | 0   | 0   | 0   | 0   | 0   | 0   | 0   | 0   | 212 | 0    | 0   | 0   | 0   | 0   | 0    | 0    | 0    | 0    | 0    | 0    | 0    | 0    |
| Candidatus Mycoplasma girerdii                         | 0   | 0   | 0   | 0   | 0   | 0   | 0   | 0   | 0   | 0    | 0   | 0   | 0   | 0   | 0    | 0    | 0    | 0    | 0    | 0    | 0    | 0    |
| Alloicoccus                                            | 0   | 0   | 0   | 0   | 0   | 0   | 0   | 0   | 0   | 0    | 0   | 0   | 0   | 0   | 0    | 0    | 0    | 0    | 0    | 0    | 0    | 0    |
| Corynebacterium founierii/mucifaciens/ureicelerivorans | 0   | 0   | 0   | 0   | 0   | 0   | 0   | 0   | 0   | 0    | 0   | 0   | 0   | 0   | 0    | 0    | 0    | 0    | 0    | 46   | 0    | 0    |
| Corynebacterium auris/timonense                        | 0   | 83  | 0   | 0   | 0   | 0   | 0   | 0   | 0   | 0    | 0   | 0   | 0   | 0   | 0    | 0    | 0    | 0    | 0    | 0    | 0    | 0    |
| Veillonella ratti/seminalis                            | 0   | 0   | 0   | 0   | 0   | 0   | 0   | 0   | 0   | 0    | 0   | 0   | 0   | 0   | 0    | 0    | 0    | 0    | 0    | 0    | 0    | 0    |

# Samples S81 - S111

| Species                                    | S81 | S82 | S84 | S85 | S86 | S87 | S88 | S90 | S91  | S92 | S94 | S95 | S96 | S97 | S100 | S103 | S104 | S106 | S108 | S109 | S110 | S111 |
|--------------------------------------------|-----|-----|-----|-----|-----|-----|-----|-----|------|-----|-----|-----|-----|-----|------|------|------|------|------|------|------|------|
| Lactobacillus gasseri                      | 0   | 0   | 0   | 0   | 0   | 258 | 0   | 0   | 0    | 0   | 0   | 0   | 0   | 0   | 0    | 0    | 0    | 0    | 0    | 0    | 0    | 0    |
| Tissierella                                | 0   | 0   | 0   | 0   | 0   | 0   | 0   | 0   | 0    | 0   | 0   | 0   | 0   | 0   | 0    | 0    | 0    | 0    | 0    | 0    | 0    | 0    |
| Granulicatella adiacens                    | 0   | 0   | 0   | 0   | 0   | 0   | 0   | 0   | 0    | 0   | 0   | 0   | 0   | 0   | 0    | 0    | 239  | 0    | 0    | 0    | 0    | 0    |
| Sutterella                                 | 0   | 0   | 0   | 0   | 0   | 0   | 0   | 0   | 0    | 0   | 0   | 0   | 0   | 0   | 0    | 0    | 0    | 0    | 0    | 0    | 0    | 0    |
| Prevotella nancaiensis                     | 0   | 0   | 0   | 0   | 0   | 0   | 0   | 0   | 0    | 0   | 0   | 0   | 0   | 0   | 0    | 0    | 0    | 0    | 0    | 0    | 8842 | 0    |
| Lactobacillus jensenii                     | 0   | 0   | 0   | 0   | 0   | 0   | 0   | 0   | 0    | 0   | 0   | 0   | 0   | 0   | 0    | 0    | 0    | 0    | 0    | 0    | 0    | 0    |
| Lactobacillus crispatus                    | 0   | 0   | 0   | 0   | 0   | 0   | 112 | 0   | 0    | 0   | 0   | 0   | 0   | 0   | 0    | 0    | 0    | 0    | 0    | 0    | 0    | 0    |
| Candidate Division TM7 vaginal (genus)     | 0   | 0   | 0   | 0   | 0   | 0   | 0   | 0   | 0    | 0   | 0   | 0   | 0   | 0   | 0    | 0    | 0    | 0    | 0    | 0    | 0    | 0    |
| Candidatus Saccharimonas                   | 0   | 0   | 0   | 0   | 0   | 0   | 0   | 0   | 0    | 0   | 0   | 0   | 0   | 0   | 0    | 0    | 0    | 0    | 0    | 0    | 0    | 0    |
| Peptococcus niger                          | 0   | 0   | 0   | 0   | 0   | 0   | 0   | 0   | 0    | 0   | 0   | 0   | 0   | 0   | 0    | 0    | 0    | 0    | 0    | 0    | 0    | 0    |
| Neisseria flavescens/perflava              | 0   | 0   | 0   | 0   | 0   | 0   | 0   | 0   | 0    | 0   | 0   | 0   | 0   | 0   | 0    | 0    | 0    | 0    | 0    | 0    | 0    | 0    |
| Gemella sanguinis                          | 0   | 0   | 0   | 0   | 0   | 0   | 0   | 0   | 0    | 0   | 0   | 0   | 0   | 0   | 0    | 0    | 0    | 0    | 0    | 0    | 0    | 0    |
| Porphyromonas                              | 0   | 0   | 0   | 0   | 0   | 0   | 0   | 0   | 0    | 0   | 0   | 0   | 0   | 0   | 0    | 0    | 80   | 0    | 0    | 5708 | 0    | 0    |
| Prevotella                                 | 0   | 0   | 0   | 0   | 0   | 0   | 0   | 0   | 0    | 0   | 0   | 0   | 0   | 0   | 0    | 0    | 0    | 0    | 0    | 0    | 1563 | 0    |
| Corynebacterium thomssenii                 | 0   | 0   | 0   | 0   | 0   | 0   | 0   | 0   | 0    | 0   | 0   | 0   | 0   | 0   | 0    | 0    | 0    | 0    | 0    | 0    | 0    | 0    |
| Lachnospiraceae                            | 0   | 0   | 0   | 0   | 0   | 0   | 0   | 0   | 0    | 0   | 0   | 0   | 0   | 0   | 0    | 0    | 0    | 0    | 0    | 0    | 0    | 0    |
| Corynebacterium tuberculostearicum         | 0   | 0   | 0   | 0   | 0   | 0   | 0   | 0   | 0    | 0   | 0   | 0   | 0   | 0   | 0    | 0    | 0    | 0    | 0    | 0    | 0    | 0    |
| Dermabacter hominis                        | 0   | 0   | 0   | 0   | 0   | 0   | 0   | 0   | 0    | 0   | 0   | 0   | 0   | 0   | 0    | 0    | 0    | 0    | 0    | 33   | 0    | 0    |
| Veillonella rogosae                        | 0   | 0   | 0   | 0   | 0   | 0   | 0   | 0   | 5753 | 0   | 0   | 0   | 0   | 0   | 0    | 0    | 0    | 0    | 0    | 0    | 0    | 0    |
| Actinomyces hongkongensis                  | 0   | 0   | 0   | 0   | 0   | 0   | 0   | 0   | 0    | 0   | 0   | 0   | 0   | 0   | 0    | 94   | 0    | 0    | 0    | 0    | 0    | 0    |
| Veillonella parvula/rogosae                | 0   | 0   | 0   | 0   | 0   | 0   | 0   | 0   | 2236 | 0   | 0   | 0   | 0   | 0   | 0    | 0    | 0    | 0    | 0    | 0    | 0    | 0    |
| Anaerococcus provencensis                  | 0   | 0   | 0   | 0   | 0   | 0   | 0   | 0   | 0    | 0   | 0   | 0   | 0   | 0   | 0    | 0    | 0    | 0    | 0    | 0    | 0    | 0    |
| Porphyromonas sp. type 1                   | 0   | 0   | 0   | 0   | 0   | 0   | 0   | 0   | 0    | 0   | 0   | 0   | 0   | 0   | 0    | 0    | 0    | 0    | 0    | 0    | 0    | 0    |
| Brevibacterium paucivorans                 | 0   | 41  | 0   | 0   | 0   | 0   | 0   | 0   | 0    | 0   | 0   | 0   | 0   | 0   | 0    | 0    | 0    | 0    | 0    | 0    | 0    | 0    |
| Peptostreptococcus                         | 0   | 0   | 0   | 0   | 0   | 0   | 0   | 0   | 0    | 0   | 0   | 0   | 0   | 0   | 0    | 0    | 0    | 0    | 0    | 0    | 0    | 0    |
| Facklamia languida                         | 0   | 0   | 0   | 0   | 0   | 0   | 0   | 0   | 0    | 0   | 0   | 0   | 0   | 0   | 0    | 0    | 0    | 0    | 0    | 0    | 0    | 0    |
| Streptobacillus                            | 0   | 0   | 0   | 0   | 0   | 0   | 0   | 0   | 0    | 0   | 0   | 0   | 0   | 0   | 0    | 0    | 0    | 0    | 0    | 0    | 0    | 0    |
| Gemella haemolysans                        | 0   | 0   | 0   | 0   | 0   | 0   | 0   | 0   | 0    | 0   | 0   | 0   | 0   | 0   | 0    | 0    | 0    | 0    | 0    | 0    | 0    | 0    |
| Haemophilus sputorum                       | 0   | 0   | 0   | 0   | 0   | 0   | 0   | 0   | 0    | 0   | 0   | 0   | 0   | 0   | 0    | 0    | 72   | 0    | 0    | 0    | 0    | 0    |
| Actinotignum urinale                       | 0   | 0   | 0   | 0   | 0   | 0   | 0   | 0   | 0    | 0   | 0   | 0   | 0   | 0   | 0    | 0    | 0    | 0    | 0    | 0    | 0    | 0    |
| Dialister pneumosintes                     | 0   | 0   | 0   | 0   | 0   | 0   | 0   | 0   | 0    | 0   | 0   | 0   | 0   | 0   | 0    | 0    | 0    | 0    | 0    | 0    | 0    | 0    |
| Treponema pallidum                         | 0   | 0   | 0   | 0   | 0   | 0   | 0   | 0   | 0    | 0   | 0   | 0   | 0   | 0   | 0    | 0    | 0    | 0    | 0    | 0    | 0    | 0    |
| Porphyromonas bennonis                     | 0   | 0   | 0   | 0   | 0   | 0   | 0   | 0   | 0    | 0   | 0   | 0   | 0   | 0   | 0    | 0    | 0    | 0    | 0    | 0    | 0    | 0    |
| Bergeyella                                 | 0   | 0   | 0   | 0   | 0   | 0   | 0   | 0   | 0    | 0   | 0   | 0   | 0   | 0   | 0    | 0    | 0    | 0    | 0    | 0    | 0    | 0    |
| Actinotignum schaalii/timonense            | 0   | 0   | 0   | 0   | 0   | 0   | 0   | 0   | 0    | 0   | 0   | 0   | 0   | 0   | 0    | 0    | 0    | 0    | 0    | 0    | 0    | 0    |
| Klebsiella aerogenes/Kluyvera cryocrescens | 0   | 0   | 0   | 0   | 0   | 0   | 0   | 0   | 0    | 0   | 0   | 0   | 0   | 0   | 0    | 0    | 0    | 0    | 0    | 0    | 0    | 0    |
| Rothia mucilaginosa                        | 0   | 0   | 0   | 0   | 0   | 0   | 0   | 0   | 0    | 0   | 0   | 0   | 0   | 0   | 0    | 0    | 0    | 0    | 0    | 0    | 0    | 0    |
| Solobacterium moorei                       | 0   | 0   | 0   | 0   | 0   | 0   | 0   | 0   | 0    | 0   | 0   | 0   | 0   | 0   | 0    | 0    | 0    | 0    | 0    | 0    | 0    | 0    |
| Mageeibacillus indolicus                   | 0   | 0   | 0   | 0   | 0   | 0   | 0   | 0   | 0    | 0   | 0   | 0   | 0   | 0   | 0    | 0    | 76   | 0    | 0    | 0    | 0    | 0    |
| Serratia urelytica                         | 0   | 0   | 0   | 0   | 0   | 0   | 0   | 0   | 0    | 0   | 0   | 0   | 0   | 0   | 0    | 0    | 0    | 0    | 0    | 0    | 0    | 0    |
| Peptoniphilus obesi                        | 0   | 0   | 0   | 0   | 0   | 0   | 0   | 0   | 0    | 0   | 0   | 0   | 0   | 0   | 0    | 0    | 0    | 0    | 0    | 0    | 0    | 0    |
| Peptoniphilus harei/phoceensis             | 0   | 0   | 0   | 0   | 0   | 0   | 0   | 0   | 0    | 0   | 0   | 0   | 0   | 0   | 0    | 0    | 0    | 0    | 0    | 0    | 0    | 0    |
| Corynebacterium atypicum                   | 0   | 0   | 0   | 0   | 0   | 0   | 0   | 0   | 0    | 0   | 0   | 0   | 0   | 0   | 0    | 0    | 0    | 0    | 0    | 0    | 0    | 0    |
| Atopobium minutum                          | 0   | 0   | 0   | 0   | 0   | 0   | 0   | 0   | 0    | 0   | 0   | 0   | 0   | 0   | 0    | 0    | 0    | 0    | 0    | 0    | 0    | 0    |
| Corynebacterium genitalium                 | 0   | 41  | 0   | 0   | 0   | 0   | 0   | 0   | 0    | 0   | 0   | 0   | 0   | 0   | 0    | 0    | 0    | 0    | 0    | 0    | 0    | 0    |
| Bifidobacterium tsurumiense                | 0   | 0   | 0   | 0   | 0   | 0   | 0   | 0   | 0    | 0   | 0   | 0   | 0   | 0   | 0    | 0    | 0    | 0    | 0    | 0    | 0    | 0    |
| Micrococcus                                | 0   | 0   | 0   | 0   | 0   | 0   | 0   | 0   | 0    | 0   | 0   | 0   | 0   | 0   | 0    | 0    | 0    | 0    | 0    | 0    | 0    | 0    |
| Megasphaera genomsp. type_1                | 0   | 0   | 0   | 0   | 0   | 0   | 0   | 0   | 0    | 0   | 0   | 0   | 0   | 0   | 0    | 0    | 308  | 0    | 0    | 0    | 0    | 0    |
| Enhydrobacter                              | 0   | 0   | 0   | 0   | 0   | 0   | 0   | 0   | 0    | 0   | 0   | 0   | 0   | 0   | 0    | 0    | 0    | 0    | 0    | 0    | 0    | 0    |
| Fastidiosipila sanguinis                   | 0   | 0   | 0   | 0   | 0   | 0   | 0   | 0   | 0    | 0   | 0   | 0   | 0   | 0   | 0    | 0    | 0    | 0    | 0    | 0    | 0    | 0    |
| Prevotellamassilia                         | 0   | 0   | 0   | 0   | 0   | 0   | 0   | 0   | 0    | 0   | 0   | 0   | 0   | 0   | 0    | 0    | 0    | 0    | 0    | 0    | 0    | 0    |
| Peptostreptococcaceae                      | 0   | 0   | 0   | 0   | 0   | 0   | 0   | 0   | 0    | 0   | 0   | 0   | 0   | 0   | 0    | 0    | 0    | 0    | 0    | 0    | 0    | 0    |
| Morganella morganii                        | 0   | 0   | 0   | 0   | 0   | 0   | 0   | 0   | 0    | 0   | 0   | 0   | 0   | 0   | 0    | 0    | 0    | 0    | 0    | 0    | 0    | 0    |
| Neofamilia                                 | 0   | 0   | 0   | 0   | 0   | 0   | 0   | 0   | 0    | 0   | 0   | 0   | 0   | 0   | 0    | 0    | 0    | 0    | 0    | 0    | 0    | 0    |
| Pseudoclavibacter bifida                   | 0   | 0   | 0   | 0   | 0   | 0   | 0   | 0   | 0    | 0   | 0   | 0   | 0   | 0   | 0    | 0    | 0    | 0    | 0    | 32   | 0    | 0    |
| Helcococcus                                | 0   | 0   | 0   | 0   | 0   | 0   | 0   | 0   | 0    | 0   | 0   | 0   | 0   | 0   | 0    | 0    | 0    | 0    | 0    | 0    | 0    | 0    |
| Brevibacterium ravenpurgense               | 0   | 0   | 0   | 0   | 0   | 0   | 0   | 0   | 0    | 0   | 0   | 0   | 0   | 0   | 0    | 0    | 0    | 0    | 0    | 0    | 0    | 0    |
| Moryella indoligenes                       | 0   | 0   | 0   | 0   | 0   | 0   | 0   | 0   | 0    | 0   | 0   | 0   | 0   | 0   | 0    | 0    | 0    | 0    | 0    | 0    | 0    | 0    |
| Olegusella massiliensis                    | 0   | 0   | 0   | 0   | 0   | 0   | 0   | 0   | 0    | 0   | 0   | 0   | 0   | 0   | 0    | 0    | 0    | 0    | 0    | 0    | 0    | 0    |
| Morococcus cerebrosus                      | 0   | 0   | 0   | 0   | 0   | 0   | 0   | 0   | 0    | 0   | 0   | 0   | 0   | 0   | 0    | 0    | 0    | 0    | 0    | 0    | 0    | 0    |
| Prevotella scopos                          | 0   | 0   | 0   | 0   | 0   | 0   | 0   | 0   | 0    | 0   | 0   | 0   | 0   | 0   | 0    | 0    | 0    | 0    | 0    | 0    | 0    | 0    |
| Veillonella parvula/tobetsuensis           | 0   | 0   | 0   | 0   | 0   | 0   | 0   | 0   | 0    | 0   | 0   | 0   | 0   | 0   | 0    | 0    | 0    | 0    | 0    | 0    | 0    | 0    |
| Moryella                                   | 0   | 0   | 0   | 0   | 0   | 0   | 0   | 0   | 0    | 0   | 0   | 0   | 0   | 0   | 0    | 0    | 0    | 0    | 0    | 0    | 0    | 0    |
| Atopobium parvulum                         | 0   | 0   | 0   | 0   | 0   | 0   | 0   | 0   | 0    | 0   | 0   | 0   | 0   | 0   | 0    | 0    | 0    | 0    | 0    | 0    | 0    | 0    |
| Serratia marcescens                        | 0   | 0   | 0   | 0   | 0   | 0   | 0   | 0   | 0    | 0   | 0   | 0   | 0   | 0   | 0    | 0    | 0    | 0    | 0    | 0    | 0    | 0    |
| Collinsella aerofaciens                    | 0   | 0   | 0   | 0   | 0   | 0   | 0   | 0   | 0    | 0   | 0   | 0   | 0   | 0   | 0    | 0    | 0    | 0    | 0    | 0    | 0    | 0    |
| Curvibacter                                | 0   | 0   | 0   | 0   | 0   | 0   | 0   | 0   | 0    | 0   | 0   | 0   | 0   | 0   | 0    | 0    | 0    | 0    | 0    | 0    | 0    | 0    |
| Rothia dentocariosa                        | 0   | 0   | 0   | 0   | 0   | 0   | 0   | 0   | 0    | 0   | 0   | 0   | 0   | 0   | 0    | 0    | 0    | 0    | 0    | 0    | 0    | 0    |
| Prevotella bergensis                       | 0   | 0   | 0   | 0   | 0   | 0   | 0   | 0   | 0    | 0   | 0   | 0   | 0   | 0   | 0    | 0    | 0    | 0    | 0    | 0    | 0    | 0    |
| Corynebacterium sundsvallense              | 0   | 0   | 0   | 0   | 0   | 0   | 0   | 0   | 0    | 0   | 0   | 0   | 0   | 0   | 0    | 0    | 0    | 0    | 0    | 92   | 0    | 0    |

# Samples S81 - S111

| Species                                       | S81 | S82 | S84 | S85 | S86 | S87 | S88 | S90 | S91 | S92 | S94 | S95 | S96 | S97 | S100 | S103 | S104 | S106 | S108 | S109 | S110 | S111 |
|-----------------------------------------------|-----|-----|-----|-----|-----|-----|-----|-----|-----|-----|-----|-----|-----|-----|------|------|------|------|------|------|------|------|
| Coriobacteria                                 | 0   | 0   | 0   | 0   | 0   | 0   | 0   | 0   | 0   | 0   | 0   | 0   | 0   | 0   | 0    | 0    | 0    | 0    | 0    | 0    | 0    | 0    |
| Neisseria meningitidis                        | 0   | 0   | 0   | 0   | 0   | 0   | 0   | 0   | 0   | 0   | 0   | 0   | 0   | 0   | 0    | 0    | 0    | 0    | 0    | 0    | 0    | 0    |
| Dermacoccus nishinomiyaensis                  | 0   | 0   | 0   | 0   | 0   | 0   | 0   | 0   | 0   | 0   | 0   | 0   | 0   | 0   | 0    | 0    | 0    | 0    | 0    | 0    | 0    | 0    |
| Leptotrichia                                  | 0   | 0   | 0   | 0   | 0   | 0   | 0   | 0   | 0   | 0   | 0   | 0   | 0   | 0   | 0    | 0    | 0    | 29   | 0    | 0    | 0    | 0    |
| Microbacteriaceae                             | 0   | 0   | 0   | 0   | 0   | 0   | 0   | 0   | 0   | 0   | 0   | 0   | 0   | 0   | 0    | 0    | 0    | 0    | 0    | 0    | 0    | 0    |
| Klebsiella pneumoniae/variiicola              | 0   | 0   | 0   | 0   | 0   | 0   | 0   | 0   | 0   | 0   | 0   | 0   | 0   | 0   | 0    | 0    | 0    | 0    | 0    | 0    | 0    | 0    |
| Hafnia alvei                                  | 0   | 0   | 0   | 0   | 0   | 0   | 0   | 0   | 0   | 0   | 0   | 0   | 0   | 0   | 0    | 0    | 0    | 0    | 0    | 0    | 0    | 0    |
| Caulobacter                                   | 0   | 0   | 0   | 0   | 0   | 0   | 0   | 0   | 0   | 0   | 0   | 0   | 0   | 0   | 0    | 0    | 0    | 0    | 0    | 0    | 0    | 0    |
| Lactobacillus reuteri                         | 0   | 0   | 0   | 0   | 0   | 0   | 0   | 0   | 0   | 0   | 0   | 0   | 0   | 0   | 0    | 0    | 0    | 0    | 0    | 0    | 0    | 0    |
| Gemella morbillorum                           | 0   | 0   | 0   | 0   | 0   | 0   | 0   | 0   | 0   | 0   | 0   | 0   | 0   | 0   | 0    | 0    | 0    | 34   | 0    | 0    | 0    | 0    |
| Rothia                                        | 0   | 0   | 0   | 0   | 0   | 0   | 0   | 0   | 0   | 0   | 0   | 0   | 0   | 0   | 0    | 0    | 0    | 0    | 0    | 131  | 0    | 0    |
| Campylobacter                                 | 0   | 0   | 0   | 0   | 0   | 0   | 0   | 0   | 0   | 0   | 0   | 0   | 0   | 0   | 0    | 0    | 0    | 0    | 0    | 0    | 0    | 0    |
| Prevotella genogroup 3                        | 0   | 0   | 0   | 0   | 0   | 0   | 0   | 0   | 0   | 0   | 0   | 0   | 0   | 0   | 0    | 0    | 0    | 0    | 0    | 0    | 0    | 0    |
| Staphylococcus warneri                        | 0   | 0   | 0   | 0   | 0   | 0   | 0   | 0   | 0   | 0   | 0   | 0   | 0   | 0   | 0    | 0    | 0    | 0    | 0    | 0    | 0    | 0    |
| Blautia wexlerae                              | 0   | 0   | 0   | 0   | 0   | 0   | 0   | 0   | 0   | 0   | 0   | 0   | 0   | 0   | 0    | 0    | 0    | 0    | 0    | 0    | 0    | 0    |
| Lachnoanaerobaculum                           | 0   | 0   | 0   | 0   | 0   | 0   | 0   | 0   | 0   | 0   | 0   | 0   | 0   | 0   | 0    | 0    | 0    | 0    | 0    | 0    | 0    | 0    |
| Anaerococcus hydrogenalis/senegalensis        | 0   | 0   | 0   | 0   | 0   | 0   | 0   | 0   | 0   | 0   | 0   | 0   | 0   | 0   | 0    | 0    | 0    | 0    | 0    | 0    | 0    | 0    |
| Brevibacterium mcbrellneri                    | 0   | 0   | 0   | 0   | 0   | 0   | 0   | 0   | 0   | 0   | 0   | 0   | 0   | 0   | 0    | 0    | 0    | 0    | 0    | 0    | 0    | 0    |
| Corynebacterium glaucum                       | 0   | 0   | 0   | 0   | 0   | 0   | 0   | 0   | 0   | 0   | 0   | 0   | 0   | 0   | 0    | 0    | 0    | 0    | 0    | 0    | 0    | 0    |
| Prevotella salivae                            | 0   | 0   | 0   | 0   | 0   | 0   | 0   | 0   | 0   | 0   | 0   | 0   | 0   | 0   | 0    | 0    | 0    | 0    | 0    | 0    | 0    | 0    |
| Coriobacteriaceae                             | 0   | 0   | 0   | 0   | 0   | 0   | 0   | 0   | 0   | 0   | 0   | 0   | 0   | 0   | 0    | 0    | 0    | 0    | 0    | 0    | 0    | 0    |
| Bulleidia                                     | 0   | 0   | 0   | 0   | 0   | 0   | 0   | 0   | 0   | 0   | 0   | 0   | 0   | 0   | 0    | 0    | 0    | 0    | 0    | 0    | 0    | 0    |
| Peptococcus                                   | 0   | 0   | 0   | 0   | 0   | 0   | 0   | 0   | 0   | 0   | 0   | 0   | 0   | 0   | 0    | 0    | 0    | 0    | 0    | 0    | 0    | 0    |
| Serratia marcescens/nematodiphila             | 0   | 0   | 0   | 0   | 0   | 0   | 0   | 0   | 0   | 0   | 0   | 0   | 0   | 0   | 0    | 0    | 0    | 0    | 0    | 0    | 0    | 0    |
| Leptotrichia wadei                            | 0   | 0   | 0   | 0   | 0   | 0   | 0   | 0   | 0   | 0   | 0   | 0   | 0   | 0   | 0    | 0    | 0    | 0    | 0    | 0    | 0    | 0    |
| Neisseriaceae                                 | 0   | 0   | 0   | 0   | 0   | 0   | 0   | 0   | 0   | 0   | 0   | 0   | 0   | 0   | 0    | 0    | 0    | 0    | 0    | 0    | 0    | 0    |
| Aerococcus sanguinicola                       | 0   | 0   | 0   | 0   | 0   | 0   | 0   | 0   | 0   | 0   | 0   | 0   | 0   | 0   | 0    | 0    | 0    | 0    | 0    | 0    | 0    | 0    |
| Criobacterium bergeronii                      | 0   | 0   | 0   | 0   | 0   | 0   | 0   | 0   | 0   | 0   | 0   | 0   | 0   | 0   | 0    | 0    | 0    | 0    | 0    | 0    | 0    | 0    |
| Brevibacterium luteolum                       | 0   | 0   | 0   | 0   | 0   | 0   | 0   | 0   | 0   | 0   | 0   | 0   | 0   | 0   | 0    | 0    | 0    | 0    | 0    | 0    | 0    | 0    |
| Klebsiella pneumoniae                         | 0   | 0   | 0   | 0   | 0   | 0   | 0   | 0   | 0   | 0   | 0   | 0   | 0   | 0   | 0    | 0    | 0    | 0    | 0    | 0    | 0    | 0    |
| Actinomyces oris/viscosus                     | 0   | 0   | 0   | 0   | 0   | 0   | 0   | 0   | 0   | 0   | 0   | 0   | 0   | 0   | 0    | 0    | 0    | 0    | 0    | 0    | 0    | 0    |
| Mycobacterium chelonae complex                | 0   | 0   | 0   | 0   | 0   | 0   | 0   | 0   | 0   | 0   | 0   | 0   | 0   | 0   | 0    | 0    | 0    | 0    | 0    | 0    | 0    | 0    |
| Corynebacterium jeddahense                    | 0   | 0   | 0   | 0   | 0   | 0   | 0   | 0   | 0   | 0   | 0   | 0   | 0   | 0   | 0    | 0    | 0    | 0    | 0    | 0    | 0    | 0    |
| Peptostreptococcus stomatis                   | 0   | 0   | 0   | 0   | 0   | 0   | 0   | 0   | 0   | 0   | 0   | 0   | 0   | 0   | 0    | 0    | 0    | 0    | 0    | 0    | 0    | 0    |
| Megasphaera                                   | 0   | 0   | 0   | 0   | 0   | 0   | 0   | 0   | 0   | 0   | 0   | 0   | 0   | 0   | 0    | 0    | 0    | 0    | 0    | 0    | 0    | 0    |
| Campylobacter rectus/showae                   | 0   | 0   | 0   | 0   | 0   | 0   | 0   | 0   | 0   | 0   | 0   | 0   | 0   | 0   | 0    | 0    | 0    | 0    | 0    | 0    | 0    | 0    |
| Staphylococcus carnosus/condimenti            | 0   | 0   | 0   | 0   | 0   | 0   | 0   | 0   | 0   | 0   | 0   | 0   | 0   | 0   | 0    | 0    | 0    | 0    | 0    | 0    | 0    | 0    |
| Prevotella pallens                            | 0   | 0   | 0   | 0   | 0   | 0   | 0   | 0   | 0   | 0   | 0   | 0   | 0   | 0   | 0    | 0    | 0    | 0    | 0    | 0    | 0    | 0    |
| Prolinoborus fasciculus/Acinetobacter lwoffii | 0   | 0   | 0   | 0   | 0   | 0   | 0   | 0   | 0   | 0   | 0   | 0   | 0   | 0   | 0    | 0    | 0    | 0    | 0    | 0    | 0    | 0    |
| Staphylococcus nepalensis                     | 0   | 0   | 0   | 0   | 0   | 0   | 0   | 0   | 0   | 0   | 0   | 0   | 0   | 0   | 0    | 0    | 0    | 0    | 0    | 0    | 0    | 0    |
| Staphylococcaceae                             | 0   | 0   | 0   | 0   | 0   | 0   | 0   | 0   | 0   | 0   | 0   | 0   | 0   | 0   | 0    | 0    | 0    | 0    | 0    | 0    | 0    | 0    |
| Cruoricaptor                                  | 0   | 0   | 0   | 0   | 0   | 0   | 0   | 0   | 0   | 0   | 0   | 0   | 0   | 0   | 0    | 0    | 0    | 0    | 0    | 0    | 0    | 0    |
| [Eubacterium] hallii                          | 0   | 0   | 0   | 0   | 0   | 0   | 0   | 0   | 0   | 0   | 0   | 0   | 0   | 0   | 0    | 0    | 0    | 0    | 0    | 0    | 0    | 0    |
| BVAB1 (species)                               | 0   | 0   | 0   | 0   | 0   | 0   | 0   | 0   | 0   | 0   | 0   | 0   | 0   | 0   | 0    | 0    | 0    | 172  | 0    | 0    | 0    | 0    |
| Stomatobaculum                                | 0   | 0   | 0   | 0   | 0   | 0   | 0   | 0   | 0   | 0   | 0   | 0   | 0   | 0   | 0    | 0    | 0    | 0    | 0    | 0    | 0    | 0    |
| Mycoplasma                                    | 0   | 0   | 0   | 0   | 0   | 0   | 0   | 0   | 0   | 0   | 0   | 0   | 0   | 0   | 0    | 0    | 0    | 0    | 0    | 0    | 0    | 0    |
| Catenibacterium mitsuokai                     | 0   | 0   | 0   | 0   | 0   | 0   | 0   | 0   | 0   | 0   | 0   | 0   | 0   | 0   | 0    | 0    | 0    | 0    | 0    | 0    | 0    | 0    |
| Veillonella parvula                           | 0   | 0   | 0   | 0   | 0   | 0   | 0   | 0   | 0   | 0   | 0   | 0   | 0   | 0   | 0    | 0    | 0    | 0    | 0    | 0    | 0    | 0    |
| Corynebacterium kroppenstedtii                | 0   | 0   | 0   | 0   | 0   | 0   | 0   | 0   | 0   | 0   | 0   | 0   | 0   | 0   | 0    | 0    | 0    | 0    | 0    | 0    | 0    | 0    |
| Eremococcus coleocola                         | 0   | 0   | 0   | 0   | 0   | 0   | 0   | 0   | 0   | 0   | 0   | 0   | 0   | 0   | 0    | 0    | 0    | 0    | 0    | 0    | 0    | 0    |
| Actinomyces europaeus                         | 0   | 0   | 0   | 0   | 0   | 0   | 0   | 0   | 0   | 0   | 0   | 0   | 0   | 0   | 0    | 0    | 0    | 0    | 0    | 0    | 0    | 0    |
| Peptoniphilus senegalensis                    | 0   | 0   | 0   | 0   | 0   | 0   | 0   | 0   | 0   | 0   | 0   | 0   | 0   | 0   | 0    | 0    | 0    | 0    | 0    | 0    | 0    | 0    |
| Corynebacterium afermentans/humii             | 0   | 0   | 0   | 0   | 0   | 0   | 0   | 0   | 0   | 0   | 0   | 0   | 0   | 0   | 0    | 0    | 0    | 0    | 0    | 0    | 0    | 0    |
| Acinetobacter                                 | 0   | 0   | 0   | 0   | 0   | 0   | 0   | 0   | 0   | 0   | 0   | 0   | 0   | 0   | 0    | 0    | 0    | 0    | 0    | 0    | 0    | 0    |
| Eggerthellaceae                               | 0   | 0   | 0   | 0   | 0   | 0   | 0   | 0   | 0   | 0   | 0   | 0   | 0   | 0   | 0    | 0    | 0    | 0    | 0    | 0    | 0    | 0    |
| Corynebacterium mucifaciens                   | 0   | 0   | 0   | 0   | 0   | 0   | 0   | 0   | 0   | 0   | 0   | 0   | 0   | 0   | 0    | 0    | 0    | 0    | 0    | 0    | 0    | 0    |
| Filifactor                                    | 0   | 0   | 0   | 0   | 0   | 0   | 0   | 0   | 0   | 0   | 0   | 0   | 0   | 0   | 0    | 0    | 0    | 0    | 0    | 0    | 0    | 0    |
| Ruminococcus faecis                           | 0   | 0   | 0   | 0   | 0   | 0   | 0   | 0   | 0   | 0   | 0   | 0   | 0   | 0   | 0    | 0    | 0    | 0    | 0    | 0    | 0    | 0    |
| Lactobacillus                                 | 0   | 0   | 0   | 0   | 0   | 95  | 0   | 0   | 0   | 0   | 0   | 0   | 0   | 0   | 0    | 0    | 0    | 0    | 0    | 0    | 0    | 0    |
| Peptoniphilus grossensis/rhinitidis           | 0   | 0   | 0   | 0   | 0   | 0   | 0   | 0   | 0   | 0   | 0   | 0   | 0   | 0   | 0    | 0    | 0    | 0    | 0    | 0    | 0    | 0    |
| Aerococcus urinaequi/viridans                 | 0   | 0   | 0   | 0   | 0   | 0   | 0   | 0   | 0   | 0   | 0   | 0   | 0   | 0   | 0    | 0    | 0    | 0    | 0    | 0    | 0    | 0    |
| Anaerostipes hadrus                           | 0   | 0   | 0   | 0   | 0   | 0   | 0   | 0   | 0   | 0   | 0   | 0   | 0   | 0   | 0    | 0    | 0    | 0    | 0    | 0    | 0    | 0    |
| Lagierella                                    | 0   | 0   | 0   | 0   | 0   | 0   | 0   | 0   | 0   | 0   | 0   | 0   | 0   | 0   | 0    | 0    | 0    | 0    | 0    | 0    | 0    | 0    |
| Neisseria cinerea/meningitidis                | 0   | 0   | 0   | 0   | 0   | 0   | 0   | 0   | 0   | 0   | 0   | 0   | 0   | 0   | 0    | 0    | 0    | 0    | 0    | 0    | 0    | 0    |
| Micrococcus lylae                             | 0   | 0   | 0   | 0   | 0   | 0   | 0   | 0   | 0   | 0   | 0   | 0   | 0   | 0   | 0    | 0    | 0    | 0    | 0    | 0    | 0    | 0    |
| Staphylococcus cohnii                         | 0   | 0   | 0   | 0   | 0   | 0   | 0   | 0   | 0   | 0   | 0   | 0   | 0   | 0   | 0    | 0    | 0    | 0    | 0    | 0    | 0    | 0    |
| Casaltella massiliensis                       | 0   | 0   | 0   | 0   | 0   | 0   | 0   | 0   | 0   | 0   | 0   | 0   | 0   | 0   | 0    | 0    | 0    | 0    | 0    | 0    | 0    | 0    |
| Stomatobaculum longum                         | 0   | 0   | 0   | 0   | 0   | 0   | 0   | 0   | 0   | 0   | 0   | 0   | 0   | 0   | 0    | 0    | 0    | 0    | 0    | 0    | 0    | 0    |
| Lautropia                                     | 0   | 0   | 0   | 0   | 0   | 0   | 0   | 0   | 0   | 0   | 0   | 0   | 0   | 0   | 0    | 0    | 0    | 0    | 0    | 0    | 0    | 0    |
| Fastidiosipila                                | 0   | 0   | 0   | 0   | 0   | 0   | 0   | 0   | 0   | 0   | 0   | 0   | 0   | 0   | 0    | 0    | 0    | 0    | 0    | 0    | 0    | 0    |

Samples S81 - S111

| Species                                      | S81 | S82 | S84 | S85 | S86 | S87 | S88 | S90 | S91 | S92 | S94 | S95 | S96 | S97 | S100 | S103 | S104 | S106 | S108 | S109 | S110 | S111 |
|----------------------------------------------|-----|-----|-----|-----|-----|-----|-----|-----|-----|-----|-----|-----|-----|-----|------|------|------|------|------|------|------|------|
| Corynebacterium durum                        | 0   | 0   | 0   | 0   | 0   | 0   | 0   | 0   | 0   | 0   | 0   | 0   | 0   | 0   | 0    | 0    | 0    | 0    | 0    | 0    | 0    | 0    |
| Actinomyces graevenitzi                      | 0   | 0   | 0   | 0   | 0   | 0   | 0   | 0   | 0   | 0   | 0   | 0   | 0   | 0   | 0    | 0    | 0    | 0    | 0    | 0    | 0    | 0    |
| Staphylococcus cohnii/saprophyticus          | 0   | 0   | 0   | 0   | 0   | 0   | 0   | 0   | 0   | 0   | 0   | 0   | 0   | 0   | 0    | 0    | 0    | 0    | 0    | 0    | 0    | 0    |
| Leptotrichia trevisanii                      | 0   | 0   | 0   | 0   | 0   | 0   | 0   | 0   | 0   | 0   | 0   | 0   | 0   | 0   | 0    | 0    | 0    | 0    | 0    | 0    | 0    | 0    |
| Candidatus Paraburkholderia calva            | 0   | 0   | 0   | 0   | 0   | 0   | 0   | 0   | 0   | 0   | 0   | 0   | 0   | 0   | 0    | 0    | 0    | 0    | 0    | 0    | 0    | 0    |
| Actinomyces urogenitalis                     | 0   | 0   | 0   | 0   | 0   | 0   | 0   | 0   | 0   | 0   | 0   | 0   | 0   | 0   | 0    | 0    | 0    | 0    | 0    | 0    | 0    | 0    |
| Clostridiales                                | 0   | 0   | 0   | 0   | 0   | 0   | 0   | 0   | 0   | 0   | 0   | 0   | 0   | 0   | 0    | 0    | 0    | 0    | 0    | 0    | 0    | 0    |
| Pasteurella caballi                          | 0   | 0   | 0   | 0   | 0   | 0   | 0   | 0   | 0   | 0   | 0   | 0   | 0   | 0   | 0    | 0    | 0    | 0    | 0    | 0    | 0    | 0    |
| Fusobacterium hwasookii/nucleatum            | 0   | 0   | 0   | 0   | 0   | 0   | 0   | 0   | 0   | 0   | 0   | 0   | 0   | 0   | 0    | 0    | 0    | 0    | 0    | 0    | 0    | 0    |
| Corynebacterium riegelii                     | 0   | 0   | 0   | 0   | 0   | 0   | 0   | 0   | 0   | 0   | 0   | 0   | 0   | 0   | 0    | 0    | 0    | 0    | 0    | 0    | 0    | 0    |
| Hafnia                                       | 0   | 0   | 0   | 0   | 0   | 0   | 0   | 0   | 0   | 0   | 0   | 0   | 0   | 0   | 0    | 0    | 0    | 0    | 0    | 0    | 0    | 0    |
| Staphylococcus equorum/saprophyticus/xylosum | 0   | 0   | 0   | 0   | 0   | 0   | 0   | 0   | 0   | 0   | 0   | 0   | 0   | 0   | 0    | 0    | 0    | 0    | 0    | 0    | 0    | 0    |
| Acinetobacter lwoffii                        | 0   | 0   | 0   | 0   | 0   | 0   | 0   | 0   | 0   | 0   | 0   | 0   | 0   | 0   | 0    | 0    | 0    | 0    | 0    | 0    | 0    | 0    |
| Micrococcus cohnii                           | 0   | 0   | 0   | 0   | 0   | 0   | 0   | 0   | 0   | 0   | 0   | 0   | 0   | 0   | 0    | 0    | 0    | 0    | 0    | 0    | 0    | 0    |
| Pseudoclavibacter faecalis                   | 0   | 0   | 0   | 0   | 0   | 0   | 0   | 0   | 0   | 0   | 0   | 0   | 0   | 0   | 0    | 0    | 0    | 0    | 0    | 0    | 0    | 0    |
| Leptotrichia buccalis                        | 0   | 0   | 0   | 0   | 0   | 0   | 0   | 0   | 0   | 0   | 0   | 0   | 0   | 0   | 0    | 0    | 0    | 0    | 0    | 0    | 0    | 0    |
| Actinomyces                                  | 0   | 0   | 0   | 0   | 0   | 0   | 0   | 0   | 0   | 0   | 0   | 0   | 0   | 0   | 0    | 0    | 0    | 0    | 0    | 0    | 0    | 0    |
| Fusobacterium nucleatum/periodonticum        | 0   | 0   | 0   | 0   | 0   | 0   | 0   | 0   | 0   | 0   | 0   | 0   | 0   | 0   | 0    | 0    | 0    | 0    | 0    | 0    | 0    | 0    |
| Lactobacillus saerimneri                     | 0   | 0   | 0   | 0   | 0   | 0   | 0   | 0   | 0   | 0   | 0   | 0   | 0   | 0   | 0    | 0    | 0    | 0    | 0    | 0    | 0    | 0    |
| Actinomycetaceae                             | 0   | 0   | 0   | 0   | 0   | 0   | 0   | 0   | 0   | 0   | 0   | 0   | 0   | 0   | 0    | 0    | 0    | 0    | 0    | 0    | 0    | 0    |
| Dialister                                    | 0   | 0   | 0   | 0   | 0   | 0   | 0   | 0   | 0   | 0   | 0   | 0   | 0   | 0   | 0    | 0    | 0    | 0    | 0    | 0    | 0    | 0    |
| Neisseria mucosa/subflava                    | 0   | 0   | 0   | 0   | 0   | 0   | 0   | 0   | 0   | 0   | 0   | 0   | 0   | 0   | 0    | 0    | 0    | 0    | 0    | 0    | 0    | 0    |
| Paracoccus                                   | 0   | 0   | 0   | 0   | 0   | 0   | 0   | 0   | 0   | 0   | 0   | 0   | 0   | 0   | 0    | 0    | 0    | 0    | 0    | 0    | 0    | 0    |
| Acinetobacter haemolyticus/johnsonii         | 0   | 0   | 0   | 0   | 0   | 0   | 0   | 0   | 0   | 0   | 0   | 0   | 0   | 0   | 0    | 0    | 0    | 0    | 0    | 0    | 0    | 0    |
| Neisseria subflava                           | 0   | 0   | 0   | 0   | 0   | 0   | 0   | 0   | 0   | 0   | 0   | 0   | 0   | 0   | 0    | 0    | 0    | 0    | 0    | 0    | 0    | 0    |
| Acinetobacter proteolyticus                  | 0   | 0   | 0   | 0   | 0   | 0   | 0   | 0   | 0   | 0   | 0   | 0   | 0   | 0   | 0    | 0    | 0    | 0    | 0    | 0    | 0    | 0    |
| Dorea formicigenerans                        | 0   | 0   | 0   | 0   | 0   | 0   | 0   | 0   | 0   | 0   | 0   | 0   | 0   | 0   | 0    | 0    | 0    | 0    | 0    | 0    | 0    | 0    |
| Corynebacterium tuscaniense                  | 0   | 0   | 0   | 0   | 0   | 0   | 0   | 0   | 0   | 0   | 0   | 0   | 0   | 0   | 0    | 0    | 0    | 0    | 0    | 0    | 0    | 0    |
| Massiliomicrobiota timonensis                | 0   | 0   | 0   | 0   | 0   | 0   | 0   | 0   | 0   | 0   | 0   | 0   | 0   | 0   | 0    | 0    | 0    | 0    | 0    | 0    | 0    | 0    |
| Fusobacterium hwasookii                      | 0   | 0   | 0   | 0   | 0   | 0   | 0   | 0   | 0   | 0   | 0   | 0   | 0   | 0   | 0    | 0    | 0    | 0    | 0    | 0    | 0    | 0    |
| Pseudoglutamicibacter albus                  | 0   | 0   | 0   | 0   | 0   | 0   | 0   | 0   | 0   | 0   | 0   | 0   | 0   | 0   | 0    | 0    | 0    | 0    | 0    | 0    | 0    | 0    |
| Clostridiales Family XIII. Incertae Sedis    | 0   | 0   | 0   | 0   | 0   | 0   | 0   | 0   | 0   | 0   | 0   | 0   | 0   | 0   | 0    | 0    | 0    | 0    | 0    | 0    | 0    | 0    |
| Kocuria marina/rhizophila                    | 0   | 0   | 0   | 0   | 0   | 0   | 0   | 0   | 0   | 0   | 0   | 0   | 0   | 0   | 0    | 0    | 0    | 0    | 0    | 0    | 0    | 0    |
| Kocuria                                      | 0   | 0   | 0   | 0   | 0   | 0   | 0   | 0   | 0   | 0   | 0   | 0   | 0   | 0   | 0    | 0    | 0    | 0    | 0    | 0    | 0    | 0    |
| Alloprevotella rava                          | 0   | 0   | 0   | 0   | 0   | 0   | 0   | 0   | 0   | 0   | 0   | 0   | 0   | 0   | 0    | 0    | 0    | 0    | 0    | 0    | 0    | 0    |
| Staphylococcus pettenkoferi                  | 0   | 0   | 0   | 0   | 0   | 0   | 0   | 0   | 0   | 0   | 0   | 0   | 0   | 0   | 0    | 0    | 0    | 0    | 0    | 0    | 0    | 0    |
| Streptococcus pseudoporcinus                 | 0   | 0   | 0   | 0   | 0   | 0   | 0   | 0   | 0   | 0   | 0   | 0   | 0   | 0   | 0    | 0    | 0    | 0    | 0    | 64   | 0    | 0    |
| Kingella                                     | 0   | 0   | 0   | 0   | 0   | 0   | 0   | 0   | 0   | 0   | 0   | 0   | 0   | 0   | 0    | 0    | 0    | 0    | 0    | 0    | 0    | 0    |
| Eikenella                                    | 0   | 0   | 0   | 0   | 0   | 0   | 0   | 0   | 0   | 0   | 0   | 0   | 0   | 0   | 0    | 0    | 0    | 0    | 0    | 0    | 0    | 0    |
| Actinomyces odontolyticus                    | 0   | 0   | 0   | 0   | 0   | 0   | 0   | 0   | 0   | 0   | 0   | 0   | 0   | 0   | 0    | 0    | 0    | 0    | 0    | 0    | 0    | 0    |
| Corynebacterium sphenisci                    | 0   | 0   | 0   | 0   | 0   | 0   | 0   | 0   | 0   | 0   | 0   | 0   | 0   | 0   | 0    | 0    | 0    | 0    | 0    | 0    | 0    | 0    |
| Cutibacterium                                | 0   | 0   | 0   | 0   | 0   | 0   | 0   | 0   | 0   | 0   | 0   | 0   | 0   | 0   | 0    | 0    | 0    | 0    | 0    | 0    | 0    | 0    |
| Staphylococcus xylosum                       | 0   | 0   | 0   | 0   | 0   | 0   | 0   | 0   | 0   | 0   | 0   | 0   | 0   | 0   | 0    | 0    | 0    | 0    | 0    | 0    | 0    | 0    |
| Burkholderiales                              | 0   | 0   | 0   | 0   | 0   | 0   | 0   | 0   | 0   | 0   | 0   | 0   | 0   | 0   | 0    | 0    | 0    | 0    | 0    | 0    | 0    | 0    |
| Massiliomicrobiota/Mycoplasma                | 0   | 0   | 0   | 0   | 0   | 0   | 0   | 0   | 0   | 0   | 0   | 0   | 0   | 0   | 0    | 0    | 0    | 0    | 0    | 0    | 0    | 0    |
| Bacteroidales                                | 0   | 0   | 0   | 0   | 0   | 0   | 0   | 0   | 0   | 0   | 0   | 0   | 0   | 0   | 0    | 0    | 0    | 0    | 0    | 0    | 0    | 0    |
| Campylobacter fetus                          | 0   | 0   | 0   | 0   | 0   | 0   | 0   | 0   | 0   | 0   | 0   | 0   | 0   | 0   | 0    | 0    | 0    | 0    | 0    | 0    | 0    | 0    |
| Prevotella aurantiaca                        | 0   | 0   | 0   | 0   | 0   | 0   | 0   | 0   | 0   | 0   | 0   | 0   | 0   | 0   | 0    | 0    | 0    | 0    | 0    | 0    | 0    | 0    |
| Corynebacterium freneyi/xerosis              | 0   | 0   | 0   | 0   | 0   | 0   | 0   | 0   | 0   | 0   | 0   | 0   | 0   | 0   | 0    | 0    | 0    | 0    | 0    | 0    | 0    | 0    |
| Aerococcaceae                                | 0   | 0   | 0   | 0   | 0   | 0   | 0   | 0   | 0   | 0   | 0   | 0   | 0   | 0   | 0    | 0    | 0    | 0    | 0    | 0    | 0    | 0    |
| Moraxella lacunata                           | 0   | 0   | 0   | 0   | 0   | 0   | 0   | 0   | 0   | 0   | 0   | 0   | 0   | 0   | 0    | 0    | 0    | 0    | 0    | 0    | 0    | 0    |
| Corynebacterium accolens/macginleyi          | 0   | 0   | 0   | 0   | 0   | 0   | 0   | 0   | 0   | 0   | 0   | 0   | 0   | 0   | 0    | 0    | 0    | 0    | 0    | 0    | 0    | 0    |
| Massilia aurea                               | 0   | 0   | 0   | 0   | 0   | 0   | 0   | 0   | 0   | 0   | 0   | 0   | 0   | 0   | 0    | 0    | 0    | 0    | 0    | 0    | 0    | 0    |
| Corynebacterium casei                        | 0   | 0   | 0   | 0   | 0   | 0   | 0   | 0   | 0   | 0   | 0   | 0   | 0   | 0   | 0    | 0    | 0    | 0    | 0    | 0    | 0    | 0    |
| Helcococcus sueciensis                       | 0   | 0   | 0   | 0   | 0   | 0   | 0   | 0   | 0   | 0   | 0   | 0   | 0   | 0   | 0    | 0    | 0    | 0    | 0    | 0    | 0    | 0    |
| Lactobacillus casei/rhannosus                | 0   | 0   | 0   | 0   | 0   | 0   | 0   | 0   | 0   | 0   | 0   | 0   | 0   | 0   | 0    | 0    | 0    | 33   | 0    | 0    | 0    | 0    |
| Holdemanella biformis                        | 0   | 0   | 0   | 0   | 0   | 0   | 0   | 0   | 0   | 0   | 0   | 0   | 0   | 0   | 0    | 0    | 0    | 0    | 0    | 0    | 0    | 0    |
| Pelistega                                    | 0   | 0   | 0   | 0   | 0   | 0   | 0   | 0   | 0   | 0   | 0   | 0   | 0   | 0   | 0    | 0    | 0    | 0    | 0    | 0    | 0    | 0    |
| Actinomyces massiliensis                     | 0   | 0   | 0   | 0   | 0   | 0   | 0   | 0   | 0   | 0   | 0   | 0   | 0   | 0   | 0    | 0    | 0    | 0    | 0    | 0    | 0    | 0    |
| Massilia                                     | 0   | 0   | 0   | 0   | 0   | 0   | 0   | 0   | 0   | 0   | 0   | 0   | 0   | 0   | 0    | 0    | 0    | 0    | 0    | 0    | 0    | 0    |
| Staphylococcus equorum/xylosum               | 0   | 0   | 0   | 0   | 0   | 0   | 0   | 0   | 0   | 0   | 0   | 0   | 0   | 0   | 0    | 0    | 0    | 0    | 0    | 0    | 0    | 0    |
| Streptococcus                                | 0   | 0   | 0   | 0   | 0   | 0   | 0   | 0   | 0   | 0   | 0   | 0   | 0   | 0   | 0    | 0    | 0    | 0    | 0    | 0    | 0    | 0    |
| Cutibacterium avidum                         | 0   | 0   | 0   | 0   | 0   | 0   | 0   | 0   | 26  | 0   | 0   | 0   | 0   | 0   | 0    | 0    | 0    | 0    | 0    | 0    | 0    | 0    |

# Samples S112 - S141

| Species                                              | S112 | S113 | S114  | S115 | S116  | S117 | S118  | S119 | S120  | S121  | S124  | S127  | S128 | S129  | S130  | S131 | S133  | S134 | S135  | S137  | S139  | S141  |
|------------------------------------------------------|------|------|-------|------|-------|------|-------|------|-------|-------|-------|-------|------|-------|-------|------|-------|------|-------|-------|-------|-------|
| Streptococcus mitis group                            | 0    | 0    | 25    | 0    | 0     | 0    | 0     | 130  | 0     | 0     | 8990  | 25069 | 0    | 0     | 0     | 1912 | 30665 | 84   | 24309 | 26    | 8075  | 29    |
| Lactobacillus iners                                  | 0    | 0    | 0     | 0    | 0     | 0    | 0     | 0    | 0     | 0     | 4947  | 0     | 7250 | 31798 | 0     | 0    | 0     | 1466 | 43    | 0     | 0     | 0     |
| Gardnerella vaginalis                                | 0    | 1597 | 0     | 0    | 0     | 0    | 2662  | 0    | 0     | 0     | 6641  | 0     | 8941 | 2464  | 0     | 0    | 0     | 2672 | 0     | 0     | 0     | 0     |
| Corynebacterium pseudogenitalium/tuberculoostearicum | 328  | 0    | 945   | 276  | 23541 | 1894 | 15149 | 179  | 675   | 80    | 141   | 152   | 0    | 0     | 0     | 849  | 0     | 914  | 431   | 300   | 948   | 5534  |
| Streptococcus agalactiae                             | 2166 | 0    | 0     | 0    | 0     | 0    | 0     | 0    | 0     | 0     | 0     | 0     | 0    | 0     | 0     | 0    | 0     | 0    | 0     | 0     | 0     | 0     |
| Veillonella montpellierensis                         | 0    | 1869 | 0     | 0    | 0     | 0    | 0     | 0    | 0     | 0     | 11540 | 0     | 0    | 1382  | 0     | 0    | 0     | 0    | 0     | 0     | 0     | 0     |
| Streptococcus anginosus                              | 696  | 0    | 0     | 0    | 0     | 0    | 0     | 4834 | 0     | 0     | 408   | 0     | 0    | 0     | 0     | 0    | 0     | 0    | 0     | 0     | 42300 | 0     |
| Chlamydia trachomatis                                | 0    | 0    | 0     | 3399 | 0     | 0    | 0     | 0    | 29110 | 52579 | 0     | 0     | 0    | 0     | 31863 | 0    | 0     | 0    | 0     | 0     | 0     | 32228 |
| Haemophilus parainfluenzae                           | 0    | 0    | 0     | 0    | 0     | 0    | 0     | 0    | 0     | 0     | 0     | 0     | 0    | 0     | 0     | 0    | 0     | 0    | 0     | 0     | 0     | 0     |
| Finegoldia magna                                     | 1749 | 357  | 0     | 550  | 0     | 133  | 398   | 66   | 0     | 0     | 0     | 0     | 0    | 0     | 0     | 208  | 0     | 1432 | 242   | 57    | 2441  | 130   |
| Peptoniphilus asaccharolyticus/grossensis/harei      | 1180 | 1183 | 0     | 1621 | 0     | 0    | 0     | 0    | 0     | 0     | 0     | 0     | 0    | 0     | 0     | 0    | 0     | 4338 | 0     | 0     | 1831  | 0     |
| Sneathia amnii                                       | 0    | 0    | 0     | 0    | 0     | 0    | 0     | 0    | 0     | 0     | 0     | 0     | 0    | 38    | 0     | 0    | 0     | 0    | 0     | 0     | 0     | 0     |
| Staphylococcus caprae/cohnii/epidermidis             | 71   | 0    | 88    | 0    | 2642  | 143  | 4359  | 319  | 38    | 0     | 0     | 0     | 62   | 48    | 0     | 0    | 0     | 168  | 375   | 84    | 50    | 97    |
| Gemella haemolysans/taiwanensis                      | 0    | 0    | 0     | 0    | 0     | 0    | 0     | 0    | 0     | 0     | 0     | 239   | 0    | 0     | 0     | 261  | 83    | 586  | 40    | 0     | 0     | 0     |
| Sneathia sanguinogens                                | 0    | 1788 | 0     | 0    | 0     | 0    | 0     | 0    | 0     | 0     | 14521 | 0     | 0    | 0     | 0     | 0    | 0     | 0    | 0     | 0     | 0     | 0     |
| Mycoplasma genitalium                                | 0    | 0    | 0     | 0    | 0     | 0    | 0     | 444  | 0     | 0     | 0     | 0     | 0    | 0     | 0     | 0    | 0     | 0    | 0     | 0     | 0     | 0     |
| Mycoplasma penetrans                                 | 0    | 0    | 0     | 0    | 0     | 0    | 0     | 0    | 0     | 0     | 0     | 0     | 0    | 0     | 0     | 0    | 0     | 0    | 0     | 0     | 0     | 0     |
| Haemophilus haemolyticus/quentini                    | 0    | 0    | 0     | 0    | 0     | 0    | 0     | 0    | 0     | 0     | 0     | 0     | 0    | 0     | 0     | 0    | 1044  | 112  | 0     | 0     | 0     | 0     |
| Corynebacterium pyruvicoproductens                   | 0    | 0    | 0     | 146  | 0     | 0    | 0     | 0    | 0     | 0     | 0     | 0     | 0    | 0     | 0     | 0    | 0     | 1374 | 0     | 0     | 1155  | 0     |
| Anaerococcus prevotii/tetradius                      | 164  | 373  | 0     | 1108 | 0     | 25   | 0     | 0    | 0     | 0     | 0     | 0     | 0    | 0     | 0     | 74   | 0     | 823  | 58    | 0     | 377   | 0     |
| Haemophilus influenzae                               | 0    | 0    | 0     | 0    | 0     | 0    | 0     | 6848 | 0     | 0     | 0     | 0     | 0    | 0     | 0     | 0    | 0     | 26   | 0     | 51691 | 0     | 0     |
| Staphylococcus epidermidis/hominis                   | 0    | 0    | 104   | 25   | 161   | 383  | 451   | 0    | 0     | 0     | 0     | 69    | 0    | 46    | 0     | 39   | 97    | 0    | 434   | 0     | 185   | 0     |
| Atopobium vaginae                                    | 0    | 3053 | 0     | 0    | 0     | 0    | 0     | 0    | 0     | 0     | 53    | 0     | 0    | 65    | 0     | 0    | 0     | 0    | 0     | 0     | 0     | 0     |
| Ureaplasma parvum/urealyticum                        | 0    | 181  | 459   | 0    | 0     | 0    | 0     | 0    | 0     | 0     | 40    | 0     | 185  | 168   | 0     | 0    | 0     | 127  | 0     | 0     | 0     | 0     |
| Prevotella timonensis                                | 2616 | 1211 | 0     | 589  | 0     | 0    | 0     | 0    | 0     | 0     | 0     | 0     | 0    | 0     | 0     | 0    | 0     | 1790 | 0     | 0     | 592   | 0     |
| Fenollaria massiliensis/timonensis                   | 6010 | 187  | 0     | 377  | 0     | 0    | 0     | 0    | 0     | 0     | 0     | 0     | 0    | 0     | 0     | 0    | 0     | 0    | 0     | 0     | 0     | 0     |
| Anaerococcus                                         | 0    | 51   | 0     | 127  | 0     | 0    | 31    | 0    | 0     | 0     | 0     | 48    | 0    | 0     | 0     | 0    | 0     | 1015 | 0     | 0     | 0     | 0     |
| Corynebacterium coyleae                              | 276  | 0    | 0     | 252  | 148   | 0    | 111   | 0    | 0     | 0     | 0     | 149   | 0    | 0     | 0     | 0    | 0     | 56   | 0     | 332   | 1660  | 0     |
| Prevotella bivia                                     | 2500 | 449  | 0     | 0    | 0     | 0    | 0     | 0    | 0     | 0     | 1354  | 0     | 0    | 0     | 0     | 0    | 0     | 0    | 0     | 0     | 190   | 0     |
| Prevotella melaninogenica                            | 0    | 0    | 0     | 0    | 0     | 0    | 0     | 0    | 0     | 0     | 0     | 0     | 0    | 0     | 0     | 0    | 0     | 0    | 0     | 0     | 0     | 0     |
| Corynebacterium aurimucosum/minutissimum/singulare   | 233  | 0    | 1025  | 66   | 7397  | 442  | 3731  | 31   | 28    | 0     | 0     | 0     | 0    | 0     | 0     | 517  | 0     | 436  | 369   | 0     | 617   | 905   |
| Staphylococcus aureus                                | 0    | 0    | 0     | 0    | 0     | 0    | 0     | 0    | 0     | 0     | 0     | 0     | 0    | 0     | 0     | 0    | 0     | 0    | 0     | 0     | 0     | 0     |
| Anaerococcus lactolyticus                            | 302  | 647  | 0     | 751  | 0     | 0    | 0     | 76   | 0     | 0     | 0     | 0     | 0    | 0     | 0     | 0    | 0     | 1433 | 0     | 0     | 1108  | 0     |
| Aerococcus christensenii                             | 1291 | 246  | 0     | 0    | 0     | 0    | 0     | 0    | 0     | 0     | 0     | 0     | 0    | 178   | 0     | 0    | 0     | 1044 | 0     | 0     | 0     | 0     |
| Corynebacterium glucuronolyticum                     | 0    | 0    | 0     | 0    | 0     | 0    | 0     | 0    | 0     | 0     | 0     | 0     | 0    | 0     | 0     | 25   | 0     | 0    | 0     | 34    | 0     | 0     |
| Veillonella atypica                                  | 0    | 0    | 0     | 0    | 0     | 0    | 0     | 56   | 0     | 0     | 0     | 0     | 0    | 0     | 0     | 0    | 0     | 0    | 0     | 0     | 0     | 0     |
| Veillonella                                          | 0    | 0    | 0     | 0    | 0     | 0    | 0     | 0    | 0     | 0     | 0     | 0     | 0    | 0     | 0     | 0    | 52    | 0    | 0     | 0     | 0     | 0     |
| Mycoplasma hominis                                   | 0    | 761  | 18656 | 0    | 0     | 0    | 0     | 0    | 0     | 0     | 0     | 0     | 0    | 0     | 0     | 0    | 0     | 0    | 0     | 0     | 0     | 0     |
| Granulicatella elegans                               | 0    | 43   | 0     | 0    | 0     | 0    | 0     | 3392 | 0     | 0     | 0     | 164   | 0    | 0     | 0     | 0    | 0     | 0    | 0     | 0     | 0     | 0     |
| Ezakiella                                            | 639  | 0    | 0     | 2486 | 0     | 0    | 0     | 0    | 0     | 0     | 0     | 0     | 0    | 0     | 0     | 0    | 0     | 0    | 0     | 0     | 0     | 0     |
| Shigella/Escherichia                                 | 0    | 0    | 0     | 0    | 0     | 26   | 70    | 57   | 89    | 0     | 0     | 0     | 0    | 0     | 0     | 0    | 0     | 0    | 0     | 0     | 0     | 36    |
| Streptococcus salivarius                             | 0    | 0    | 0     | 0    | 0     | 0    | 0     | 182  | 0     | 0     | 0     | 0     | 0    | 0     | 0     | 0    | 0     | 0    | 99    | 0     | 0     | 0     |
| Actinomyces turicensis                               | 296  | 312  | 0     | 461  | 0     | 0    | 0     | 0    | 0     | 0     | 0     | 0     | 0    | 0     | 0     | 0    | 0     | 455  | 0     | 0     | 0     | 0     |
| Prevotella corporis                                  | 203  | 0    | 0     | 0    | 0     | 0    | 0     | 0    | 0     | 0     | 0     | 0     | 0    | 0     | 0     | 0    | 0     | 0    | 0     | 0     | 0     | 0     |
| Corynebacterium simulans                             | 0    | 0    | 0     | 0    | 0     | 0    | 0     | 0    | 0     | 0     | 0     | 0     | 0    | 0     | 0     | 81   | 0     | 0    | 0     | 139   | 0     | 0     |
| Fusobacterium equinum                                | 0    | 0    | 0     | 0    | 0     | 0    | 0     | 0    | 0     | 0     | 0     | 0     | 0    | 0     | 0     | 0    | 0     | 0    | 0     | 0     | 0     | 0     |
| Corynebacterium                                      | 0    | 0    | 100   | 0    | 102   | 0    | 505   | 0    | 0     | 0     | 0     | 0     | 0    | 0     | 0     | 0    | 0     | 81   | 0     | 0     | 0     | 0     |
| Staphylococcus haemolyticus                          | 0    | 0    | 0     | 0    | 77    | 523  | 85    | 0    | 0     | 0     | 0     | 0     | 0    | 0     | 0     | 0    | 0     | 0    | 0     | 0     | 0     | 0     |
| Gemella asaccharolytica                              | 77   | 277  | 0     | 0    | 0     | 0    | 0     | 0    | 0     | 0     | 0     | 0     | 0    | 86    | 0     | 0    | 0     | 0    | 0     | 0     | 0     | 0     |
| Peptoniphilus                                        | 1372 | 154  | 0     | 387  | 0     | 0    | 0     | 0    | 0     | 0     | 0     | 0     | 0    | 0     | 0     | 0    | 0     | 0    | 0     | 0     | 0     | 0     |
| Corynebacterium hadale/imitans                       | 50   | 0    | 358   | 36   | 309   | 25   | 0     | 0    | 0     | 0     | 0     | 0     | 0    | 0     | 0     | 166  | 0     | 704  | 0     | 0     | 221   | 252   |
| Eggerthella sp. type 1 (species)                     | 0    | 743  | 0     | 0    | 0     | 0    | 0     | 0    | 0     | 0     | 0     | 0     | 0    | 0     | 0     | 0    | 0     | 0    | 0     | 0     | 0     | 0     |
| Prevotella disiens                                   | 534  | 2255 | 0     | 0    | 0     | 0    | 0     | 0    | 0     | 0     | 0     | 0     | 0    | 0     | 0     | 0    | 0     | 34   | 0     | 0     | 0     | 0     |
| Peptoniphilus lacrimalis                             | 2412 | 65   | 0     | 46   | 0     | 0    | 0     | 0    | 0     | 0     | 0     | 0     | 0    | 0     | 0     | 0    | 0     | 0    | 0     | 0     | 0     | 0     |
| Anaerococcus vaginalis                               | 319  | 94   | 0     | 117  | 0     | 0    | 0     | 0    | 0     | 0     | 0     | 0     | 0    | 0     | 0     | 0    | 0     | 0    | 0     | 0     | 0     | 0     |
| Facklamia hominis                                    | 0    | 0    | 0     | 134  | 0     | 0    | 0     | 0    | 0     | 0     | 0     | 0     | 0    | 0     | 0     | 776  | 0     | 148  | 27    | 0     | 0     | 0     |
| Prevotella amnii                                     | 0    | 0    | 0     | 0    | 0     | 0    | 0     | 0    | 0     | 0     | 0     | 0     | 0    | 44    | 0     | 0    | 0     | 0    | 0     | 0     | 0     | 0     |
| Campylobacter ureolyticus                            | 90   | 144  | 0     | 37   | 0     | 0    | 0     | 0    | 0     | 0     | 0     | 0     | 0    | 0     | 0     | 0    | 0     | 231  | 0     | 0     | 0     | 0     |
| BVAB2 (species)                                      | 52   | 2903 | 0     | 0    | 0     | 0    | 0     | 0    | 0     | 0     | 0     | 0     | 0    | 0     | 0     | 0    | 0     | 0    | 0     | 0     | 0     | 0     |
| Haemophilus                                          | 0    | 0    | 0     | 0    | 0     | 0    | 0     | 0    | 0     | 0     | 0     | 0     | 0    | 0     | 0     | 0    | 0     | 0    | 0     | 0     | 0     | 0     |
| Anaerococcus hydrogenalis/rubeifantis                | 30   | 0    | 0     | 0    | 0     | 0    | 0     | 0    | 0     | 0     | 0     | 112   | 0    | 0     | 0     | 0    | 0     | 93   | 45    | 0     | 0     | 0     |
| Anaerococcus mediterraneensis                        | 600  | 0    | 0     | 947  | 0     | 0    | 0     | 99   | 0     | 0     | 0     | 0     | 0    | 0     | 0     | 0    | 0     | 566  | 0     | 0     | 650   | 0     |
| Dialister sp. type 2                                 | 5105 | 2216 | 0     | 0    | 0     | 0    | 0     | 0    | 0     | 0     | 0     | 0     | 0    | 0     | 0     | 0    | 0     | 0    | 0     | 0     | 0     | 0     |
| Dialister microaerophilus                            | 1295 | 477  | 0     | 43   | 0     | 0    | 0     | 0    | 0     | 0     | 0     | 0     | 0    | 0     | 0     | 0    | 0     | 44   | 0     | 0     | 228   | 0     |
| Corynebacterium amycolatum                           | 0    | 0    | 0     | 0    | 0     | 0    | 0     | 0    | 0     | 0     | 0     | 0     | 0    | 0     | 0     | 0    | 0     | 44   | 0     | 0     | 0     | 0     |
| Ureaplasma                                           | 0    | 0    | 0     | 0    | 0     | 0    | 0     | 0    | 0     | 0     | 0     | 0     | 0    | 190   | 0     | 0    | 0     | 73   | 0     | 0     | 0     | 0     |
| Enterococcus faecalis                                | 0    | 0    | 0     | 0    | 0     | 0    | 0     | 9053 | 0     | 0     | 0     | 0     | 0    | 0     | 0     | 0    | 0     | 0    | 0     | 0     | 0     | 0     |
| Parvimonas                                           | 0    | 0    | 0     | 0    | 0     | 0    | 0     | 0    | 0     | 0     | 0     | 0     | 0    | 0     | 0     | 0    | 0     | 0    | 0     | 0     | 0     | 0     |
| Haemophilus pittmaniae                               | 0    | 0    | 0     | 0    | 0     | 0    | 0     | 0    | 0     | 0     | 0     | 0     | 0    | 0     | 0     | 0    | 0     | 0    | 0     | 0     | 0     | 0     |
| Actinomyces neuii                                    | 0    | 0    | 0     | 0    | 0     | 0    | 276   | 0    | 0     | 0     | 0     | 0     | 0    | 0     | 0     | 896  | 0     | 0    | 0     | 102   | 0     | 0     |

# Samples S112 - S141

| Species                                              | S112 | S113 | S114 | S115 | S116 | S117 | S118 | S119 | S120 | S121 | S124 | S127 | S128 | S129 | S130 | S131 | S133 | S134 | S135 | S137 | S139 | S141 |
|------------------------------------------------------|------|------|------|------|------|------|------|------|------|------|------|------|------|------|------|------|------|------|------|------|------|------|
| Peptoniphilus rhinitidis                             | 87   | 0    | 0    | 89   | 0    | 0    | 58   | 0    | 0    | 0    | 0    | 0    | 0    | 0    | 0    | 0    | 0    | 0    | 41   | 0    | 0    | 0    |
| Anaerococcus senegalensis                            | 0    | 0    | 0    | 0    | 0    | 52   | 123  | 0    | 0    | 0    | 0    | 0    | 0    | 0    | 0    | 77   | 0    | 0    | 0    | 0    | 0    | 0    |
| Peptostreptococcus anaerobius                        | 96   | 218  | 0    | 0    | 0    | 0    | 0    | 0    | 0    | 0    | 0    | 0    | 0    | 0    | 0    | 0    | 0    | 0    | 27   | 0    | 0    | 0    |
| Dialister propionificiens                            | 120  | 89   | 0    | 54   | 0    | 0    | 0    | 0    | 0    | 0    | 0    | 0    | 0    | 0    | 0    | 0    | 0    | 0    | 0    | 0    | 0    | 0    |
| Peptoniphilus harei                                  | 0    | 0    | 0    | 0    | 0    | 0    | 0    | 0    | 0    | 0    | 0    | 0    | 0    | 0    | 0    | 0    | 0    | 0    | 65   | 0    | 0    | 0    |
| Negativococcus succinicivorans                       | 0    | 0    | 0    | 260  | 0    | 0    | 0    | 0    | 0    | 0    | 0    | 0    | 0    | 0    | 0    | 0    | 0    | 0    | 0    | 0    | 0    | 0    |
| Parvimonas micra                                     | 0    | 627  | 0    | 0    | 0    | 0    | 0    | 0    | 0    | 0    | 0    | 0    | 0    | 0    | 0    | 0    | 0    | 0    | 0    | 0    | 0    | 0    |
| Actinomyces ihumii                                   | 0    | 0    | 0    | 0    | 0    | 0    | 0    | 0    | 0    | 0    | 0    | 0    | 0    | 0    | 0    | 0    | 0    | 192  | 0    | 0    | 0    | 0    |
| Actinotignum timonense                               | 0    | 0    | 0    | 0    | 0    | 0    | 0    | 0    | 0    | 0    | 0    | 0    | 0    | 0    | 0    | 0    | 0    | 0    | 0    | 0    | 0    | 0    |
| Fenollaria                                           | 672  | 0    | 0    | 126  | 0    | 0    | 0    | 0    | 0    | 0    | 0    | 0    | 0    | 0    | 0    | 0    | 0    | 0    | 0    | 0    | 0    | 0    |
| Fusobacterium massiliense                            | 0    | 0    | 0    | 0    | 0    | 0    | 0    | 0    | 0    | 0    | 0    | 0    | 0    | 0    | 0    | 0    | 0    | 0    | 0    | 0    | 0    | 0    |
| Actinobaculum massiliense                            | 0    | 0    | 0    | 0    | 0    | 0    | 0    | 0    | 0    | 0    | 0    | 0    | 0    | 0    | 0    | 0    | 0    | 0    | 0    | 0    | 0    | 0    |
| Peptoniphilus coxii                                  | 0    | 69   | 0    | 237  | 0    | 0    | 0    | 0    | 0    | 0    | 0    | 0    | 0    | 0    | 0    | 0    | 0    | 82   | 0    | 0    | 33   | 0    |
| Staphylococcus lugdunensis                           | 0    | 0    | 0    | 0    | 0    | 0    | 100  | 0    | 138  | 0    | 0    | 0    | 0    | 0    | 0    | 0    | 0    | 0    | 0    | 0    | 0    | 0    |
| Dermabacter                                          | 0    | 0    | 144  | 0    | 271  | 0    | 0    | 0    | 0    | 0    | 0    | 0    | 0    | 0    | 0    | 74   | 0    | 112  | 0    | 0    | 80   | 0    |
| Alloscardovia omnicolens                             | 0    | 0    | 0    | 0    | 0    | 0    | 0    | 0    | 0    | 0    | 0    | 0    | 0    | 0    | 0    | 0    | 0    | 0    | 0    | 0    | 0    | 0    |
| Varibaculum cambriense                               | 106  | 223  | 0    | 61   | 0    | 0    | 0    | 0    | 0    | 0    | 0    | 0    | 0    | 0    | 0    | 0    | 0    | 0    | 0    | 0    | 0    | 0    |
| Streptococcus urinalis                               | 0    | 0    | 0    | 0    | 0    | 0    | 0    | 0    | 0    | 0    | 0    | 0    | 0    | 0    | 0    | 0    | 0    | 0    | 0    | 0    | 0    | 0    |
| Corynebacterium appendicis                           | 32   | 0    | 0    | 0    | 151  | 0    | 0    | 0    | 0    | 0    | 0    | 0    | 0    | 0    | 0    | 0    | 0    | 0    | 0    | 0    | 0    | 0    |
| Actinotignum schaalii                                | 0    | 107  | 0    | 0    | 0    | 0    | 0    | 0    | 0    | 0    | 0    | 0    | 0    | 0    | 0    | 0    | 0    | 60   | 0    | 0    | 0    | 0    |
| Corynebacterium timonense                            | 0    | 0    | 0    | 0    | 0    | 0    | 0    | 0    | 0    | 0    | 0    | 0    | 0    | 0    | 0    | 649  | 0    | 0    | 0    | 0    | 0    | 0    |
| Gemella                                              | 0    | 0    | 0    | 0    | 0    | 0    | 0    | 0    | 0    | 0    | 0    | 0    | 0    | 0    | 0    | 433  | 897  | 0    | 0    | 0    | 0    | 0    |
| Klebsiella aerogenes/Enterobacter asburiae           | 0    | 0    | 0    | 0    | 0    | 0    | 0    | 0    | 0    | 0    | 0    | 0    | 0    | 0    | 0    | 0    | 0    | 0    | 0    | 0    | 0    | 0    |
| Fusobacterium periodonticum                          | 0    | 0    | 0    | 0    | 0    | 0    | 0    | 0    | 0    | 0    | 0    | 0    | 0    | 0    | 0    | 0    | 0    | 0    | 0    | 0    | 0    | 0    |
| Veillonella dispar                                   | 0    | 0    | 0    | 0    | 0    | 0    | 0    | 0    | 0    | 0    | 0    | 0    | 0    | 0    | 0    | 0    | 0    | 0    | 57   | 0    | 0    | 0    |
| Prevotella colorans                                  | 1908 | 0    | 0    | 0    | 0    | 0    | 0    | 0    | 0    | 0    | 0    | 0    | 0    | 0    | 0    | 0    | 0    | 0    | 0    | 0    | 0    | 0    |
| Candidatus Peptoniphilus massiliensis                | 372  | 0    | 0    | 0    | 0    | 0    | 0    | 0    | 0    | 0    | 0    | 0    | 0    | 0    | 0    | 0    | 0    | 0    | 0    | 0    | 0    | 0    |
| Eremococcus                                          | 52   | 0    | 0    | 49   | 0    | 0    | 0    | 0    | 0    | 0    | 0    | 0    | 0    | 0    | 0    | 50   | 0    | 40   | 0    | 0    | 0    | 77   |
| Varibaculum anthropi                                 | 0    | 0    | 0    | 0    | 0    | 0    | 0    | 0    | 0    | 0    | 0    | 0    | 0    | 0    | 0    | 0    | 0    | 0    | 0    | 0    | 0    | 0    |
| Propionimicrobium lymphophilum                       | 0    | 73   | 0    | 0    | 0    | 0    | 0    | 0    | 0    | 0    | 0    | 0    | 0    | 0    | 0    | 0    | 0    | 120  | 0    | 0    | 32   | 0    |
| Streptococcus dysgalactiae                           | 0    | 0    | 0    | 0    | 0    | 0    | 0    | 0    | 0    | 0    | 0    | 0    | 0    | 0    | 0    | 0    | 0    | 0    | 0    | 0    | 0    | 0    |
| Negativococcus                                       | 0    | 0    | 0    | 0    | 0    | 0    | 0    | 0    | 0    | 0    | 0    | 0    | 0    | 0    | 0    | 0    | 0    | 0    | 0    | 0    | 0    | 0    |
| Porphyromonas somerae                                | 0    | 0    | 0    | 693  | 0    | 0    | 0    | 0    | 0    | 0    | 0    | 0    | 0    | 0    | 0    | 0    | 0    | 0    | 0    | 0    | 0    | 0    |
| Corynebacterium jeikeium                             | 75   | 0    | 216  | 0    | 59   | 0    | 110  | 0    | 0    | 0    | 0    | 0    | 0    | 0    | 0    | 204  | 0    | 0    | 36   | 0    | 0    | 0    |
| Mobiluncus curtisii                                  | 438  | 0    | 0    | 0    | 0    | 0    | 0    | 0    | 0    | 0    | 0    | 0    | 0    | 0    | 0    | 0    | 0    | 0    | 0    | 0    | 0    | 0    |
| Porphyromonas uenonis                                | 0    | 350  | 0    | 892  | 0    | 0    | 0    | 0    | 0    | 0    | 0    | 0    | 0    | 0    | 0    | 0    | 0    | 30   | 0    | 0    | 0    | 0    |
| Aerococcus urinae                                    | 0    | 0    | 0    | 0    | 0    | 0    | 0    | 0    | 0    | 0    | 0    | 0    | 0    | 0    | 0    | 0    | 0    | 0    | 0    | 0    | 0    | 0    |
| Corynebacterium mycetoides                           | 0    | 0    | 0    | 0    | 0    | 0    | 0    | 0    | 0    | 0    | 0    | 0    | 0    | 0    | 0    | 2205 | 0    | 0    | 0    | 0    | 0    | 0    |
| Cutibacterium acnes                                  | 0    | 0    | 0    | 0    | 0    | 0    | 40   | 0    | 0    | 0    | 0    | 0    | 0    | 0    | 0    | 0    | 0    | 0    | 56   | 0    | 0    | 46   |
| Urinacoccus massiliensis                             | 177  | 122  | 0    | 53   | 0    | 0    | 0    | 0    | 0    | 0    | 0    | 0    | 0    | 0    | 0    | 0    | 0    | 223  | 0    | 0    | 0    | 0    |
| Campylobacter hominis                                | 0    | 0    | 0    | 0    | 0    | 0    | 0    | 0    | 0    | 0    | 0    | 0    | 0    | 0    | 0    | 0    | 0    | 0    | 0    | 0    | 0    | 0    |
| Staphylococcus capitis/caprae                        | 0    | 0    | 0    | 0    | 0    | 0    | 155  | 0    | 89   | 0    | 0    | 0    | 0    | 0    | 26   | 0    | 0    | 41   | 55   | 0    | 0    | 0    |
| Sneathia                                             | 0    | 494  | 0    | 0    | 0    | 0    | 0    | 0    | 0    | 0    | 0    | 0    | 0    | 0    | 0    | 0    | 0    | 0    | 0    | 0    | 0    | 0    |
| Prevotella jejuni                                    | 0    | 0    | 0    | 0    | 0    | 0    | 0    | 0    | 0    | 0    | 0    | 0    | 0    | 0    | 0    | 0    | 0    | 0    | 0    | 0    | 0    | 0    |
| Varibaculum                                          | 0    | 0    | 0    | 0    | 0    | 0    | 0    | 0    | 0    | 0    | 0    | 0    | 0    | 0    | 0    | 0    | 0    | 0    | 0    | 0    | 0    | 0    |
| Corynebacterium striatum                             | 0    | 0    | 0    | 0    | 0    | 0    | 0    | 0    | 0    | 0    | 0    | 0    | 0    | 0    | 0    | 0    | 0    | 0    | 0    | 150  | 0    | 0    |
| Jonquetella anthropi                                 | 0    | 0    | 0    | 0    | 0    | 0    | 0    | 0    | 0    | 0    | 0    | 0    | 0    | 0    | 0    | 0    | 0    | 0    | 0    | 0    | 0    | 0    |
| Peptoniphilus koenoenariae                           | 64   | 0    | 0    | 0    | 0    | 0    | 0    | 0    | 0    | 0    | 0    | 0    | 0    | 0    | 0    | 0    | 0    | 0    | 0    | 0    | 0    | 0    |
| Bifidobacterium longum                               | 0    | 0    | 0    | 0    | 0    | 0    | 0    | 0    | 0    | 0    | 0    | 0    | 0    | 0    | 0    | 0    | 0    | 0    | 0    | 0    | 0    | 0    |
| Helicobacter                                         | 0    | 0    | 0    | 0    | 0    | 0    | 0    | 0    | 0    | 0    | 0    | 0    | 0    | 0    | 0    | 0    | 0    | 0    | 0    | 0    | 0    | 0    |
| Lawsonella clevelandensis                            | 85   | 0    | 0    | 0    | 0    | 0    | 47   | 0    | 0    | 0    | 0    | 0    | 0    | 0    | 0    | 0    | 0    | 0    | 0    | 0    | 0    | 0    |
| Escherichia coli/fergusonii                          | 0    | 0    | 0    | 0    | 0    | 0    | 0    | 0    | 33   | 0    | 0    | 0    | 0    | 0    | 0    | 0    | 0    | 0    | 0    | 0    | 0    | 0    |
| Fusobacterium nucleatum                              | 0    | 0    | 0    | 0    | 0    | 0    | 0    | 0    | 0    | 0    | 0    | 0    | 0    | 0    | 0    | 0    | 0    | 0    | 0    | 0    | 0    | 0    |
| Porphyromonas asaccharolytica                        | 87   | 0    | 0    | 200  | 0    | 0    | 0    | 0    | 0    | 0    | 0    | 0    | 0    | 0    | 0    | 0    | 0    | 0    | 0    | 0    | 0    | 0    |
| Anaerococcus octavius                                | 0    | 0    | 0    | 0    | 0    | 0    | 109  | 0    | 0    | 0    | 0    | 0    | 0    | 0    | 0    | 177  | 0    | 0    | 30   | 0    | 0    | 0    |
| Fusobacterium                                        | 0    | 0    | 0    | 0    | 0    | 0    | 0    | 0    | 0    | 0    | 0    | 0    | 0    | 0    | 0    | 0    | 0    | 0    | 0    | 0    | 0    | 0    |
| Corynebacterium phoceense                            | 0    | 0    | 0    | 0    | 0    | 0    | 0    | 0    | 0    | 0    | 0    | 0    | 0    | 0    | 0    | 0    | 0    | 0    | 0    | 0    | 0    | 0    |
| Ruminococcus                                         | 0    | 0    | 0    | 0    | 0    | 0    | 0    | 0    | 0    | 0    | 0    | 0    | 0    | 0    | 0    | 0    | 0    | 0    | 0    | 0    | 0    | 0    |
| Arcanobacterium                                      | 146  | 0    | 0    | 0    | 0    | 0    | 0    | 0    | 0    | 0    | 0    | 0    | 0    | 0    | 0    | 0    | 0    | 0    | 0    | 0    | 0    | 0    |
| Khoudiadiopia                                        | 1067 | 0    | 0    | 0    | 0    | 0    | 0    | 0    | 0    | 0    | 0    | 0    | 0    | 0    | 0    | 0    | 0    | 0    | 0    | 0    | 0    | 0    |
| Atopobium deltae                                     | 74   | 53   | 0    | 0    | 0    | 0    | 0    | 0    | 0    | 0    | 0    | 0    | 0    | 0    | 0    | 0    | 0    | 0    | 0    | 0    | 0    | 0    |
| Haemophilus paraaerolyticus                          | 0    | 0    | 0    | 0    | 0    | 0    | 0    | 0    | 0    | 0    | 0    | 0    | 0    | 0    | 0    | 0    | 0    | 0    | 0    | 0    | 0    | 0    |
| Howardella                                           | 36   | 0    | 0    | 0    | 0    | 0    | 0    | 0    | 0    | 0    | 0    | 0    | 0    | 0    | 0    | 0    | 0    | 0    | 0    | 0    | 111  | 0    |
| Prevotella buccalis                                  | 179  | 45   | 0    | 0    | 0    | 0    | 0    | 0    | 0    | 0    | 0    | 0    | 0    | 0    | 0    | 0    | 0    | 0    | 0    | 0    | 0    | 0    |
| Corynebacterium auris                                | 0    | 0    | 0    | 0    | 0    | 0    | 0    | 0    | 0    | 0    | 0    | 0    | 0    | 0    | 0    | 0    | 0    | 0    | 0    | 0    | 0    | 0    |
| Candidatus Mycoplasma gireddii                       | 0    | 0    | 0    | 0    | 0    | 0    | 0    | 0    | 0    | 0    | 0    | 0    | 0    | 0    | 0    | 0    | 0    | 0    | 0    | 0    | 0    | 0    |
| Alloicoccus                                          | 0    | 0    | 0    | 0    | 0    | 0    | 0    | 0    | 0    | 0    | 0    | 0    | 0    | 0    | 0    | 0    | 0    | 0    | 0    | 0    | 0    | 0    |
| Corynebacterium founierii/mucifaciens/ureicelivorans | 0    | 0    | 0    | 0    | 0    | 0    | 131  | 0    | 0    | 0    | 0    | 0    | 0    | 0    | 0    | 0    | 0    | 0    | 41   | 0    | 0    | 25   |
| Corynebacterium auris/timonense                      | 0    | 0    | 0    | 0    | 0    | 0    | 0    | 0    | 0    | 0    | 0    | 0    | 0    | 0    | 0    | 0    | 0    | 0    | 0    | 0    | 0    | 0    |
| Veillonella ratti/seminalis                          | 0    | 0    | 0    | 0    | 0    | 0    | 0    | 0    | 0    | 0    | 0    | 0    | 0    | 0    | 0    | 0    | 0    | 0    | 0    | 0    | 0    | 0    |

# Samples S112 - S141

| Species                                    | S112 | S113 | S114 | S115 | S116 | S117 | S118 | S119 | S120 | S121 | S124 | S127 | S128 | S129 | S130 | S131 | S133 | S134 | S135 | S137 | S139 | S141 |
|--------------------------------------------|------|------|------|------|------|------|------|------|------|------|------|------|------|------|------|------|------|------|------|------|------|------|
| Lactobacillus gasseri                      | 0    | 0    | 0    | 0    | 0    | 0    | 0    | 0    | 0    | 0    | 0    | 0    | 0    | 0    | 0    | 0    | 0    | 0    | 0    | 0    | 0    | 0    |
| Tissierella                                | 34   | 38   | 0    | 385  | 0    | 0    | 0    | 0    | 0    | 0    | 0    | 0    | 0    | 0    | 0    | 0    | 0    | 0    | 0    | 0    | 0    | 0    |
| Granulicatella adiacens                    | 0    | 0    | 0    | 0    | 0    | 0    | 0    | 0    | 0    | 0    | 0    | 0    | 0    | 0    | 0    | 0    | 0    | 0    | 0    | 0    | 0    | 0    |
| Sutterella                                 | 52   | 0    | 0    | 0    | 0    | 0    | 0    | 0    | 0    | 0    | 0    | 0    | 0    | 0    | 0    | 0    | 0    | 0    | 0    | 0    | 0    | 0    |
| Prevotella nanceiensis                     | 0    | 0    | 0    | 0    | 0    | 0    | 0    | 0    | 0    | 0    | 0    | 0    | 0    | 0    | 0    | 0    | 0    | 0    | 0    | 0    | 0    | 0    |
| Lactobacillus jensenii                     | 0    | 0    | 0    | 0    | 0    | 0    | 0    | 0    | 0    | 0    | 0    | 0    | 0    | 0    | 0    | 0    | 0    | 0    | 0    | 0    | 0    | 0    |
| Lactobacillus crispatus                    | 0    | 0    | 0    | 0    | 0    | 0    | 0    | 0    | 0    | 0    | 0    | 0    | 0    | 0    | 0    | 0    | 0    | 0    | 2383 | 0    | 0    | 0    |
| Candidate Division TM7 vaginal (genus)     | 0    | 0    | 0    | 0    | 0    | 0    | 0    | 0    | 0    | 0    | 0    | 0    | 0    | 0    | 0    | 0    | 0    | 0    | 0    | 0    | 0    | 0    |
| Candidatus Saccharimonas                   | 0    | 0    | 0    | 0    | 0    | 0    | 0    | 0    | 0    | 0    | 0    | 0    | 0    | 0    | 0    | 0    | 0    | 0    | 0    | 0    | 0    | 0    |
| Peptococcus niger                          | 0    | 0    | 0    | 0    | 0    | 0    | 0    | 0    | 0    | 0    | 0    | 0    | 0    | 0    | 0    | 0    | 0    | 0    | 0    | 0    | 0    | 0    |
| Neisseria flavescens/perflava              | 0    | 0    | 0    | 0    | 0    | 0    | 0    | 0    | 0    | 0    | 0    | 0    | 0    | 0    | 0    | 26   | 0    | 0    | 0    | 0    | 0    | 0    |
| Gemella sanguinis                          | 0    | 0    | 0    | 0    | 0    | 0    | 0    | 0    | 0    | 0    | 0    | 0    | 0    | 0    | 0    | 0    | 0    | 0    | 0    | 0    | 0    | 0    |
| Porphyromonas                              | 0    | 130  | 0    | 0    | 0    | 0    | 0    | 0    | 0    | 0    | 0    | 0    | 0    | 0    | 0    | 0    | 91   | 0    | 0    | 0    | 0    | 0    |
| Prevotella                                 | 885  | 0    | 0    | 0    | 0    | 0    | 0    | 0    | 0    | 0    | 0    | 0    | 0    | 0    | 0    | 0    | 0    | 0    | 0    | 0    | 0    | 0    |
| Corynebacterium thomssenii                 | 0    | 0    | 41   | 0    | 0    | 0    | 179  | 0    | 0    | 0    | 0    | 0    | 0    | 0    | 0    | 0    | 0    | 0    | 64   | 0    | 0    | 164  |
| Lachnospiraceae                            | 0    | 0    | 0    | 0    | 0    | 0    | 0    | 0    | 0    | 0    | 0    | 0    | 0    | 0    | 0    | 0    | 0    | 0    | 0    | 0    | 0    | 0    |
| Corynebacterium tuberculo-tearicum         | 0    | 0    | 0    | 0    | 0    | 0    | 0    | 0    | 0    | 0    | 0    | 0    | 0    | 0    | 0    | 0    | 0    | 0    | 0    | 0    | 0    | 0    |
| Dermabacter hominis                        | 0    | 0    | 0    | 0    | 0    | 0    | 179  | 0    | 0    | 0    | 0    | 0    | 0    | 0    | 0    | 0    | 0    | 0    | 0    | 0    | 0    | 44   |
| Veillonella rogosae                        | 0    | 0    | 0    | 0    | 0    | 0    | 0    | 0    | 0    | 0    | 0    | 0    | 0    | 0    | 0    | 0    | 0    | 0    | 0    | 0    | 0    | 0    |
| Actinomyces hongkongensis                  | 0    | 0    | 0    | 0    | 0    | 0    | 0    | 0    | 0    | 0    | 0    | 0    | 0    | 0    | 0    | 0    | 0    | 0    | 0    | 0    | 0    | 0    |
| Veillonella parvula/rogosae                | 0    | 0    | 0    | 0    | 0    | 0    | 0    | 0    | 0    | 0    | 0    | 0    | 0    | 0    | 0    | 0    | 0    | 0    | 0    | 0    | 0    | 0    |
| Anaerococcus provencensis                  | 0    | 0    | 0    | 0    | 0    | 0    | 0    | 0    | 0    | 0    | 0    | 0    | 0    | 0    | 0    | 64   | 0    | 0    | 0    | 0    | 0    | 0    |
| Porphyromonas sp. type 1                   | 0    | 273  | 0    | 0    | 0    | 0    | 0    | 0    | 0    | 0    | 0    | 0    | 0    | 0    | 0    | 0    | 0    | 0    | 0    | 0    | 0    | 0    |
| Brevibacterium paucivorans                 | 0    | 0    | 0    | 0    | 64   | 0    | 0    | 0    | 0    | 0    | 0    | 0    | 0    | 0    | 0    | 0    | 0    | 0    | 0    | 0    | 0    | 0    |
| Peptostreptococcus                         | 0    | 0    | 0    | 0    | 0    | 0    | 0    | 0    | 0    | 0    | 0    | 0    | 0    | 0    | 0    | 0    | 0    | 0    | 0    | 0    | 0    | 0    |
| Facklamia languida                         | 0    | 0    | 0    | 0    | 0    | 0    | 0    | 0    | 0    | 0    | 0    | 0    | 0    | 0    | 0    | 0    | 0    | 0    | 0    | 0    | 0    | 0    |
| Streptobacillus                            | 0    | 0    | 0    | 0    | 0    | 0    | 0    | 0    | 0    | 0    | 0    | 0    | 0    | 0    | 0    | 0    | 0    | 0    | 0    | 0    | 0    | 0    |
| Gemella haemolysans                        | 0    | 0    | 0    | 0    | 0    | 0    | 0    | 0    | 0    | 0    | 0    | 0    | 0    | 0    | 0    | 0    | 0    | 0    | 0    | 0    | 0    | 0    |
| Haemophilus sputorum                       | 0    | 0    | 0    | 0    | 0    | 0    | 0    | 0    | 0    | 0    | 0    | 0    | 0    | 0    | 0    | 0    | 0    | 0    | 0    | 0    | 0    | 0    |
| Actinotignum urinale                       | 0    | 0    | 0    | 0    | 0    | 0    | 0    | 0    | 0    | 0    | 0    | 0    | 0    | 0    | 0    | 0    | 0    | 0    | 0    | 0    | 0    | 0    |
| Dialister pneumosintes                     | 0    | 0    | 0    | 0    | 0    | 0    | 0    | 0    | 0    | 0    | 0    | 0    | 0    | 0    | 0    | 0    | 0    | 0    | 0    | 0    | 0    | 0    |
| Treponema pallidum                         | 0    | 0    | 0    | 0    | 0    | 0    | 0    | 0    | 0    | 0    | 0    | 0    | 0    | 0    | 0    | 0    | 0    | 0    | 0    | 0    | 0    | 0    |
| Porphyromonas bennonis                     | 200  | 89   | 0    | 0    | 0    | 0    | 0    | 0    | 0    | 0    | 0    | 0    | 0    | 0    | 0    | 0    | 0    | 0    | 0    | 0    | 0    | 0    |
| Bergeyella                                 | 0    | 0    | 0    | 0    | 0    | 0    | 0    | 0    | 0    | 0    | 0    | 0    | 0    | 0    | 0    | 0    | 166  | 0    | 0    | 0    | 0    | 0    |
| Actinotignum schaalii/timonense            | 0    | 0    | 0    | 0    | 0    | 0    | 0    | 0    | 0    | 0    | 0    | 0    | 0    | 0    | 0    | 0    | 0    | 0    | 0    | 0    | 0    | 0    |
| Klebsiella aerogenes/Kluyvera cryocrescens | 0    | 0    | 0    | 0    | 0    | 0    | 0    | 0    | 0    | 0    | 0    | 0    | 0    | 0    | 0    | 0    | 0    | 0    | 0    | 0    | 0    | 0    |
| Rothia mucilaginosa                        | 0    | 0    | 0    | 0    | 0    | 0    | 0    | 45   | 0    | 0    | 0    | 0    | 0    | 0    | 0    | 0    | 0    | 0    | 96   | 0    | 0    | 0    |
| Solobacterium moorei                       | 0    | 0    | 0    | 0    | 0    | 0    | 0    | 0    | 0    | 0    | 0    | 0    | 0    | 0    | 0    | 0    | 0    | 0    | 0    | 0    | 0    | 0    |
| Mageeibacillus indolicus                   | 0    | 0    | 0    | 0    | 0    | 0    | 0    | 0    | 0    | 0    | 0    | 0    | 0    | 0    | 0    | 0    | 0    | 0    | 0    | 0    | 0    | 0    |
| Serratia urelytica                         | 0    | 0    | 0    | 0    | 0    | 0    | 0    | 3019 | 0    | 0    | 0    | 0    | 0    | 0    | 0    | 0    | 0    | 0    | 0    | 0    | 0    | 0    |
| Peptoniphilus obesi                        | 0    | 0    | 0    | 0    | 0    | 0    | 0    | 0    | 0    | 0    | 0    | 0    | 0    | 0    | 0    | 0    | 0    | 0    | 0    | 0    | 0    | 0    |
| Peptoniphilus harei/phoceensis             | 0    | 0    | 0    | 0    | 0    | 0    | 0    | 0    | 0    | 0    | 0    | 0    | 0    | 0    | 0    | 0    | 105  | 0    | 0    | 0    | 0    | 0    |
| Corynebacterium atypicum                   | 95   | 0    | 0    | 0    | 0    | 0    | 0    | 0    | 0    | 0    | 0    | 0    | 0    | 0    | 0    | 0    | 0    | 0    | 0    | 0    | 0    | 0    |
| Atopobium minutum                          | 93   | 0    | 0    | 0    | 0    | 0    | 0    | 0    | 0    | 0    | 0    | 0    | 0    | 0    | 0    | 0    | 0    | 0    | 0    | 0    | 0    | 0    |
| Corynebacterium genitalium                 | 0    | 0    | 0    | 0    | 0    | 0    | 0    | 0    | 0    | 0    | 0    | 0    | 0    | 0    | 0    | 0    | 0    | 0    | 0    | 0    | 0    | 0    |
| Bifidobacterium tsurumiense                | 0    | 0    | 0    | 0    | 0    | 0    | 0    | 0    | 0    | 0    | 0    | 0    | 0    | 0    | 0    | 0    | 0    | 0    | 0    | 0    | 0    | 0    |
| Micrococcus                                | 0    | 0    | 0    | 0    | 43   | 0    | 0    | 0    | 0    | 0    | 0    | 0    | 0    | 0    | 0    | 0    | 0    | 0    | 0    | 0    | 0    | 0    |
| Megasphaera genomsp. type_1                | 0    | 116  | 0    | 0    | 0    | 0    | 0    | 0    | 0    | 0    | 0    | 0    | 0    | 0    | 0    | 0    | 0    | 0    | 0    | 0    | 0    | 0    |
| Enhydrobacter                              | 0    | 0    | 0    | 0    | 0    | 0    | 0    | 0    | 0    | 0    | 0    | 0    | 0    | 0    | 0    | 0    | 0    | 0    | 0    | 0    | 0    | 25   |
| Fastidiosipila sanguinis                   | 0    | 0    | 0    | 40   | 0    | 0    | 0    | 0    | 0    | 0    | 0    | 0    | 0    | 0    | 0    | 0    | 0    | 0    | 0    | 0    | 0    | 0    |
| Prevotellamassilia                         | 0    | 0    | 0    | 0    | 0    | 0    | 0    | 0    | 0    | 0    | 0    | 0    | 0    | 0    | 0    | 0    | 0    | 0    | 0    | 0    | 0    | 0    |
| Peptostreptococcaceae                      | 0    | 0    | 0    | 0    | 0    | 0    | 0    | 0    | 0    | 0    | 0    | 0    | 0    | 0    | 0    | 0    | 0    | 0    | 0    | 0    | 0    | 0    |
| Morganella morganii                        | 0    | 0    | 0    | 0    | 0    | 0    | 0    | 0    | 0    | 0    | 0    | 0    | 0    | 0    | 0    | 0    | 0    | 0    | 0    | 0    | 0    | 0    |
| Neofamilia                                 | 0    | 0    | 0    | 0    | 0    | 0    | 0    | 0    | 0    | 0    | 0    | 0    | 0    | 0    | 0    | 0    | 0    | 0    | 0    | 0    | 0    | 0    |
| Pseudoclavibacter bifida                   | 0    | 0    | 0    | 0    | 0    | 0    | 0    | 0    | 0    | 0    | 0    | 0    | 0    | 0    | 0    | 0    | 0    | 0    | 0    | 0    | 0    | 0    |
| Helcococcus                                | 0    | 0    | 0    | 0    | 0    | 0    | 0    | 0    | 0    | 0    | 0    | 0    | 0    | 0    | 0    | 0    | 0    | 0    | 0    | 0    | 0    | 0    |
| Brevibacterium ravenspurgense              | 0    | 0    | 0    | 0    | 0    | 0    | 0    | 0    | 0    | 0    | 0    | 0    | 0    | 0    | 0    | 0    | 0    | 0    | 0    | 0    | 0    | 0    |
| Moryella indoligenes                       | 0    | 0    | 0    | 0    | 0    | 0    | 0    | 0    | 0    | 0    | 0    | 0    | 0    | 0    | 0    | 0    | 0    | 0    | 0    | 0    | 0    | 0    |
| Olegusella massiliensis                    | 0    | 0    | 0    | 0    | 0    | 0    | 0    | 0    | 0    | 0    | 0    | 0    | 0    | 0    | 0    | 0    | 0    | 0    | 0    | 0    | 0    | 0    |
| Morococcus cerebrosus                      | 0    | 0    | 0    | 0    | 0    | 0    | 0    | 0    | 0    | 0    | 0    | 0    | 0    | 0    | 0    | 0    | 0    | 0    | 0    | 0    | 0    | 0    |
| Prevotella scopos                          | 0    | 0    | 0    | 0    | 0    | 0    | 0    | 0    | 0    | 0    | 0    | 0    | 0    | 0    | 0    | 0    | 0    | 0    | 0    | 0    | 0    | 0    |
| Veillonella parvula/tobetsuensis           | 0    | 0    | 0    | 0    | 0    | 0    | 0    | 0    | 0    | 0    | 0    | 0    | 0    | 0    | 0    | 35   | 0    | 0    | 0    | 0    | 0    | 0    |
| Moryella                                   | 0    | 0    | 0    | 0    | 0    | 0    | 0    | 0    | 0    | 0    | 0    | 0    | 0    | 0    | 0    | 0    | 0    | 0    | 0    | 0    | 0    | 0    |
| Atopobium parvulum                         | 0    | 0    | 0    | 0    | 0    | 0    | 0    | 0    | 0    | 0    | 0    | 0    | 0    | 0    | 0    | 0    | 0    | 0    | 0    | 0    | 0    | 0    |
| Serratia marcescens                        | 0    | 0    | 0    | 0    | 0    | 0    | 0    | 1429 | 0    | 0    | 0    | 0    | 0    | 0    | 0    | 0    | 0    | 0    | 0    | 0    | 0    | 0    |
| Collinsella aerofaciens                    | 0    | 0    | 0    | 0    | 0    | 0    | 0    | 0    | 0    | 0    | 0    | 0    | 0    | 0    | 0    | 0    | 0    | 0    | 0    | 0    | 0    | 0    |
| Curvibacter                                | 0    | 0    | 0    | 0    | 0    | 0    | 0    | 0    | 0    | 0    | 0    | 0    | 0    | 0    | 0    | 0    | 0    | 0    | 0    | 0    | 0    | 0    |
| Rothia dentocariosa                        | 0    | 0    | 0    | 0    | 0    | 0    | 0    | 0    | 0    | 0    | 0    | 0    | 0    | 0    | 0    | 0    | 0    | 0    | 0    | 41   | 0    | 0    |
| Prevotella bergensis                       | 0    | 0    | 0    | 60   | 0    | 0    | 0    | 0    | 0    | 0    | 0    | 0    | 0    | 0    | 0    | 0    | 0    | 0    | 0    | 0    | 0    | 0    |
| Corynebacterium sundsvallense              | 0    | 0    | 0    | 0    | 54   | 0    | 0    | 0    | 0    | 0    | 0    | 0    | 0    | 0    | 0    | 0    | 0    | 0    | 0    | 0    | 0    | 0    |

# Samples S112 - S141

| Species                                       | S112 | S113 | S114 | S115 | S116 | S117 | S118 | S119 | S120 | S121 | S124 | S127 | S128 | S129 | S130 | S131 | S133 | S134 | S135 | S137 | S139 | S141 |
|-----------------------------------------------|------|------|------|------|------|------|------|------|------|------|------|------|------|------|------|------|------|------|------|------|------|------|
| Coriobacteria                                 | 0    | 0    | 0    | 0    | 0    | 0    | 0    | 0    | 0    | 0    | 0    | 0    | 0    | 0    | 0    | 0    | 0    | 0    | 0    | 0    | 0    | 0    |
| Neisseria meningitidis                        | 0    | 0    | 0    | 0    | 0    | 0    | 0    | 0    | 0    | 0    | 0    | 0    | 0    | 0    | 0    | 0    | 0    | 0    | 0    | 0    | 0    | 0    |
| Dermacoccus nishinomiyaensis                  | 0    | 0    | 0    | 0    | 0    | 0    | 0    | 0    | 116  | 0    | 0    | 0    | 0    | 0    | 0    | 0    | 0    | 0    | 0    | 0    | 0    | 0    |
| Leptotrichia                                  | 0    | 0    | 0    | 0    | 0    | 0    | 0    | 0    | 0    | 0    | 0    | 0    | 0    | 0    | 0    | 0    | 0    | 0    | 0    | 0    | 0    | 0    |
| Microbacteriaceae                             | 0    | 0    | 0    | 0    | 0    | 0    | 0    | 0    | 0    | 0    | 0    | 0    | 0    | 0    | 0    | 0    | 0    | 0    | 0    | 0    | 0    | 0    |
| Klebsiella pneumoniae/variiicola              | 0    | 0    | 0    | 0    | 0    | 0    | 0    | 0    | 0    | 0    | 0    | 0    | 0    | 0    | 0    | 0    | 0    | 0    | 0    | 0    | 0    | 0    |
| Hafnia alvei                                  | 0    | 0    | 0    | 0    | 0    | 0    | 0    | 0    | 0    | 0    | 0    | 0    | 0    | 0    | 0    | 0    | 0    | 0    | 0    | 0    | 0    | 0    |
| Caulobacter                                   | 0    | 0    | 0    | 0    | 0    | 0    | 0    | 0    | 0    | 0    | 0    | 0    | 0    | 0    | 0    | 0    | 0    | 0    | 0    | 0    | 0    | 0    |
| Lactobacillus reuteri                         | 0    | 0    | 0    | 0    | 0    | 0    | 0    | 0    | 0    | 0    | 0    | 0    | 0    | 0    | 0    | 0    | 0    | 0    | 254  | 0    | 0    | 0    |
| Gemella morbillorum                           | 0    | 0    | 0    | 0    | 0    | 0    | 0    | 0    | 0    | 0    | 0    | 0    | 0    | 0    | 0    | 0    | 0    | 0    | 0    | 0    | 0    | 0    |
| Rothia                                        | 0    | 0    | 0    | 0    | 0    | 0    | 0    | 0    | 0    | 0    | 0    | 0    | 0    | 0    | 0    | 0    | 0    | 0    | 0    | 0    | 0    | 0    |
| Campylobacter                                 | 0    | 0    | 0    | 0    | 0    | 0    | 0    | 0    | 0    | 0    | 0    | 0    | 0    | 0    | 0    | 0    | 0    | 0    | 0    | 0    | 0    | 0    |
| Prevotella genogroup 3                        | 0    | 0    | 0    | 0    | 0    | 0    | 0    | 0    | 0    | 0    | 0    | 0    | 0    | 0    | 0    | 0    | 0    | 0    | 0    | 0    | 0    | 0    |
| Staphylococcus warneri                        | 0    | 0    | 0    | 0    | 0    | 0    | 0    | 0    | 0    | 0    | 0    | 0    | 0    | 0    | 0    | 0    | 0    | 0    | 0    | 0    | 0    | 0    |
| Blautia wexlerae                              | 0    | 0    | 0    | 0    | 0    | 0    | 0    | 0    | 0    | 0    | 0    | 0    | 0    | 0    | 0    | 0    | 0    | 0    | 0    | 0    | 0    | 0    |
| Lachnoanaerobaculum                           | 0    | 0    | 0    | 0    | 0    | 0    | 0    | 0    | 0    | 0    | 0    | 0    | 0    | 0    | 0    | 0    | 0    | 0    | 0    | 0    | 0    | 0    |
| Anaerococcus hydrogenalis/senegalensis        | 0    | 0    | 0    | 0    | 0    | 0    | 0    | 0    | 0    | 0    | 0    | 0    | 0    | 0    | 0    | 0    | 0    | 0    | 0    | 0    | 0    | 0    |
| Brevibacterium mcbrellneri                    | 0    | 0    | 0    | 0    | 0    | 0    | 0    | 0    | 0    | 0    | 0    | 0    | 0    | 0    | 0    | 0    | 0    | 0    | 0    | 0    | 0    | 0    |
| Corynebacterium glaucum                       | 0    | 0    | 0    | 0    | 0    | 0    | 0    | 0    | 0    | 0    | 0    | 0    | 0    | 0    | 0    | 0    | 0    | 0    | 0    | 0    | 0    | 0    |
| Prevotella salivae                            | 0    | 0    | 0    | 0    | 0    | 0    | 0    | 0    | 0    | 0    | 0    | 0    | 0    | 0    | 0    | 0    | 0    | 0    | 0    | 0    | 0    | 0    |
| Coriobacteriaceae                             | 0    | 0    | 0    | 0    | 0    | 0    | 0    | 0    | 0    | 0    | 0    | 0    | 0    | 0    | 0    | 0    | 0    | 0    | 0    | 0    | 0    | 0    |
| Bulleidia                                     | 0    | 192  | 0    | 0    | 0    | 0    | 0    | 0    | 0    | 0    | 0    | 0    | 0    | 0    | 0    | 0    | 0    | 0    | 0    | 0    | 0    | 0    |
| Peptococcus                                   | 0    | 0    | 0    | 170  | 0    | 0    | 0    | 0    | 0    | 0    | 0    | 0    | 0    | 0    | 0    | 0    | 0    | 0    | 0    | 0    | 0    | 0    |
| Serratia marcescens/nematodiphila             | 0    | 0    | 0    | 0    | 0    | 0    | 0    | 605  | 0    | 0    | 0    | 0    | 0    | 0    | 0    | 0    | 0    | 0    | 0    | 0    | 0    | 0    |
| Leptotrichia wadei                            | 0    | 0    | 0    | 0    | 0    | 0    | 0    | 0    | 0    | 0    | 0    | 0    | 0    | 0    | 0    | 0    | 0    | 0    | 0    | 0    | 0    | 0    |
| Neisseriaceae                                 | 0    | 0    | 0    | 0    | 0    | 0    | 0    | 0    | 0    | 0    | 0    | 0    | 0    | 0    | 0    | 0    | 0    | 0    | 0    | 0    | 0    | 0    |
| Aerococcus sanguinicola                       | 0    | 0    | 0    | 0    | 0    | 0    | 0    | 0    | 0    | 0    | 0    | 0    | 0    | 0    | 0    | 0    | 0    | 0    | 0    | 0    | 0    | 0    |
| Criobacterium bergeronii                      | 0    | 0    | 0    | 0    | 0    | 0    | 0    | 0    | 0    | 0    | 0    | 0    | 0    | 0    | 0    | 0    | 0    | 0    | 0    | 0    | 0    | 0    |
| Brevibacterium luteolum                       | 0    | 0    | 0    | 0    | 0    | 0    | 0    | 0    | 0    | 0    | 0    | 0    | 0    | 0    | 0    | 0    | 0    | 0    | 0    | 0    | 0    | 0    |
| Klebsiella pneumoniae                         | 0    | 0    | 0    | 0    | 0    | 0    | 0    | 0    | 0    | 0    | 0    | 0    | 0    | 0    | 0    | 0    | 0    | 0    | 0    | 0    | 0    | 0    |
| Actinomyces oris/viscosus                     | 0    | 0    | 0    | 0    | 0    | 0    | 0    | 0    | 0    | 0    | 0    | 0    | 0    | 0    | 0    | 0    | 0    | 0    | 0    | 0    | 0    | 0    |
| Mycobacterium chelonae complex                | 0    | 0    | 0    | 0    | 0    | 0    | 0    | 0    | 0    | 0    | 0    | 0    | 0    | 0    | 0    | 0    | 0    | 0    | 0    | 0    | 0    | 0    |
| Corynebacterium jeddahense                    | 0    | 0    | 0    | 0    | 0    | 0    | 0    | 0    | 0    | 0    | 0    | 0    | 0    | 0    | 0    | 0    | 0    | 0    | 0    | 0    | 0    | 0    |
| Peptostreptococcus stomatis                   | 0    | 0    | 0    | 0    | 0    | 0    | 0    | 0    | 0    | 0    | 0    | 0    | 0    | 0    | 0    | 0    | 0    | 0    | 0    | 0    | 0    | 0    |
| Megasphaera                                   | 0    | 0    | 0    | 0    | 0    | 0    | 0    | 0    | 0    | 0    | 0    | 0    | 0    | 0    | 0    | 0    | 0    | 0    | 0    | 0    | 0    | 0    |
| Campylobacter rectus/showae                   | 0    | 0    | 0    | 0    | 0    | 0    | 0    | 0    | 0    | 0    | 0    | 0    | 0    | 0    | 0    | 0    | 0    | 0    | 0    | 0    | 0    | 0    |
| Staphylococcus carnosus/condimenti            | 0    | 0    | 0    | 0    | 0    | 0    | 0    | 0    | 109  | 0    | 0    | 0    | 0    | 0    | 0    | 0    | 0    | 0    | 0    | 0    | 0    | 0    |
| Prevotella pallens                            | 0    | 0    | 0    | 0    | 0    | 0    | 0    | 0    | 0    | 0    | 0    | 0    | 0    | 0    | 0    | 0    | 0    | 0    | 0    | 0    | 0    | 0    |
| Prolinoborus fasciculus/Acinetobacter lwoffii | 0    | 0    | 0    | 0    | 35   | 0    | 0    | 0    | 0    | 0    | 0    | 0    | 0    | 0    | 0    | 0    | 0    | 0    | 0    | 0    | 0    | 0    |
| Staphylococcus nepalensis                     | 0    | 0    | 0    | 0    | 0    | 0    | 0    | 0    | 0    | 0    | 0    | 0    | 0    | 0    | 0    | 0    | 0    | 0    | 0    | 0    | 0    | 0    |
| Staphylococcaceae                             | 0    | 0    | 0    | 0    | 0    | 0    | 0    | 0    | 0    | 0    | 0    | 0    | 0    | 0    | 0    | 0    | 0    | 0    | 0    | 0    | 0    | 0    |
| Cruoricaptor                                  | 0    | 0    | 0    | 0    | 0    | 0    | 0    | 0    | 0    | 0    | 0    | 0    | 0    | 0    | 0    | 0    | 0    | 0    | 0    | 0    | 0    | 0    |
| [Eubacterium] hallii                          | 0    | 0    | 0    | 0    | 0    | 0    | 0    | 0    | 0    | 0    | 0    | 0    | 0    | 0    | 0    | 0    | 0    | 0    | 0    | 0    | 0    | 0    |
| BVAB1 (species)                               | 0    | 0    | 0    | 0    | 0    | 0    | 0    | 0    | 0    | 0    | 0    | 0    | 0    | 0    | 0    | 0    | 0    | 0    | 0    | 0    | 0    | 0    |
| Stomatobaculum                                | 0    | 0    | 0    | 0    | 0    | 0    | 0    | 0    | 0    | 0    | 0    | 0    | 0    | 0    | 0    | 0    | 0    | 0    | 0    | 0    | 0    | 0    |
| Mycoplasma                                    | 0    | 0    | 0    | 0    | 0    | 306  | 0    | 0    | 0    | 0    | 0    | 0    | 0    | 0    | 0    | 0    | 0    | 0    | 0    | 0    | 0    | 0    |
| Catenibacterium mitsuokai                     | 0    | 0    | 0    | 0    | 0    | 0    | 0    | 0    | 0    | 0    | 0    | 0    | 0    | 0    | 0    | 0    | 0    | 0    | 0    | 0    | 0    | 0    |
| Veillonella parvula                           | 0    | 0    | 0    | 0    | 0    | 0    | 0    | 0    | 0    | 0    | 0    | 0    | 0    | 0    | 0    | 0    | 0    | 0    | 0    | 0    | 0    | 0    |
| Corynebacterium kroppenstedtii                | 0    | 0    | 0    | 0    | 0    | 0    | 0    | 0    | 0    | 0    | 0    | 0    | 0    | 0    | 0    | 0    | 0    | 0    | 0    | 0    | 0    | 0    |
| Eremococcus coleocola                         | 0    | 0    | 0    | 0    | 0    | 0    | 0    | 0    | 0    | 0    | 0    | 0    | 0    | 0    | 0    | 0    | 0    | 0    | 0    | 0    | 0    | 0    |
| Actinomyces europaeus                         | 0    | 0    | 0    | 30   | 0    | 0    | 0    | 0    | 0    | 0    | 0    | 0    | 0    | 0    | 0    | 0    | 0    | 0    | 0    | 0    | 0    | 0    |
| Peptoniphilus senegalensis                    | 0    | 0    | 0    | 0    | 0    | 0    | 0    | 0    | 0    | 0    | 0    | 0    | 0    | 0    | 0    | 0    | 0    | 0    | 0    | 0    | 0    | 0    |
| Corynebacterium afermentans/humii             | 0    | 0    | 0    | 0    | 0    | 0    | 0    | 0    | 0    | 0    | 0    | 0    | 0    | 0    | 0    | 0    | 0    | 0    | 0    | 0    | 0    | 0    |
| Acinetobacter                                 | 0    | 0    | 0    | 0    | 0    | 0    | 0    | 0    | 0    | 0    | 0    | 0    | 0    | 0    | 0    | 0    | 0    | 0    | 0    | 0    | 0    | 0    |
| Eggerthellaceae                               | 0    | 0    | 0    | 0    | 0    | 0    | 0    | 0    | 0    | 0    | 0    | 0    | 0    | 0    | 0    | 0    | 0    | 0    | 0    | 0    | 0    | 0    |
| Corynebacterium mucifaciens                   | 0    | 0    | 0    | 0    | 0    | 0    | 0    | 0    | 0    | 0    | 0    | 0    | 0    | 0    | 0    | 0    | 0    | 0    | 0    | 0    | 0    | 0    |
| Filifactor                                    | 0    | 0    | 0    | 0    | 0    | 0    | 0    | 0    | 0    | 0    | 0    | 0    | 0    | 0    | 0    | 0    | 0    | 0    | 0    | 0    | 0    | 0    |
| Ruminococcus faecis                           | 0    | 0    | 0    | 0    | 0    | 0    | 0    | 0    | 0    | 0    | 0    | 0    | 0    | 0    | 0    | 0    | 0    | 0    | 0    | 0    | 0    | 0    |
| Lactobacillus                                 | 0    | 0    | 0    | 0    | 0    | 0    | 0    | 0    | 0    | 0    | 0    | 0    | 0    | 0    | 0    | 0    | 0    | 0    | 0    | 0    | 0    | 0    |
| Peptoniphilus grossensis/rhinitidis           | 0    | 0    | 0    | 0    | 0    | 192  | 37   | 0    | 0    | 0    | 0    | 0    | 0    | 0    | 0    | 0    | 0    | 0    | 0    | 0    | 0    | 0    |
| Aerococcus urinaequi/viridans                 | 0    | 0    | 0    | 0    | 0    | 0    | 0    | 0    | 0    | 0    | 0    | 0    | 0    | 0    | 0    | 0    | 0    | 0    | 0    | 0    | 0    | 0    |
| Anaerostipes hadrus                           | 0    | 0    | 0    | 0    | 0    | 0    | 0    | 0    | 0    | 0    | 0    | 0    | 0    | 0    | 0    | 0    | 0    | 0    | 0    | 0    | 0    | 0    |
| Lagierella                                    | 0    | 0    | 0    | 0    | 0    | 0    | 0    | 0    | 0    | 0    | 0    | 0    | 0    | 0    | 0    | 0    | 0    | 0    | 0    | 0    | 0    | 0    |
| Neisseria cinerea/meningitidis                | 0    | 0    | 0    | 0    | 0    | 0    | 0    | 0    | 0    | 0    | 0    | 0    | 0    | 0    | 0    | 0    | 0    | 0    | 0    | 0    | 0    | 0    |
| Micrococcus lylae                             | 0    | 0    | 0    | 0    | 0    | 0    | 0    | 0    | 0    | 0    | 0    | 0    | 0    | 0    | 0    | 0    | 0    | 0    | 0    | 0    | 0    | 0    |
| Staphylococcus cohnii                         | 0    | 0    | 0    | 0    | 0    | 0    | 0    | 0    | 0    | 0    | 0    | 0    | 0    | 0    | 0    | 0    | 0    | 0    | 0    | 0    | 0    | 0    |
| Casaltella massiliensis                       | 0    | 0    | 0    | 0    | 0    | 0    | 0    | 0    | 0    | 0    | 0    | 0    | 0    | 0    | 0    | 0    | 0    | 0    | 0    | 0    | 0    | 0    |
| Stomatobaculum longum                         | 0    | 0    | 0    | 0    | 0    | 0    | 0    | 0    | 0    | 0    | 0    | 0    | 0    | 0    | 0    | 0    | 0    | 0    | 0    | 0    | 0    | 0    |
| Lautropia                                     | 0    | 0    | 0    | 0    | 0    | 0    | 0    | 0    | 0    | 0    | 0    | 0    | 0    | 0    | 0    | 0    | 0    | 0    | 0    | 0    | 0    | 0    |
| Fastidiosipila                                | 0    | 0    | 0    | 0    | 0    | 0    | 0    | 0    | 0    | 0    | 0    | 0    | 0    | 0    | 0    | 0    | 0    | 0    | 0    | 0    | 0    | 0    |



Samples S112 - S141

| Species                                      | S112 | S113 | S114 | S115 | S116 | S117 | S118 | S119 | S120 | S121 | S124 | S127 | S128 | S129 | S130 | S131 | S133 | S134 | S135 | S137 | S139 | S141 |
|----------------------------------------------|------|------|------|------|------|------|------|------|------|------|------|------|------|------|------|------|------|------|------|------|------|------|
| Corynebacterium durum                        | 0    | 0    | 0    | 0    | 0    | 0    | 0    | 0    | 0    | 0    | 0    | 0    | 0    | 0    | 0    | 0    | 0    | 0    | 0    | 0    | 0    | 0    |
| Actinomyces graevenitzi                      | 0    | 0    | 0    | 0    | 0    | 0    | 0    | 0    | 0    | 0    | 0    | 0    | 0    | 0    | 0    | 0    | 0    | 0    | 0    | 0    | 0    | 0    |
| Staphylococcus cohnii/saprophyticus          | 0    | 0    | 0    | 0    | 0    | 0    | 0    | 0    | 0    | 0    | 0    | 0    | 0    | 0    | 0    | 0    | 0    | 0    | 0    | 0    | 0    | 0    |
| Leptotrichia trevisanii                      | 0    | 0    | 0    | 0    | 0    | 0    | 0    | 0    | 0    | 0    | 0    | 0    | 0    | 0    | 0    | 0    | 0    | 0    | 0    | 0    | 0    | 0    |
| Candidatus Paraburkholderia calva            | 0    | 0    | 0    | 0    | 0    | 0    | 0    | 0    | 0    | 0    | 0    | 0    | 0    | 0    | 0    | 0    | 0    | 0    | 0    | 0    | 0    | 0    |
| Actinomyces urogenitalis                     | 0    | 0    | 0    | 0    | 0    | 0    | 0    | 0    | 0    | 0    | 0    | 0    | 0    | 0    | 0    | 0    | 0    | 0    | 0    | 0    | 0    | 0    |
| Clostridiales                                | 0    | 0    | 0    | 0    | 0    | 0    | 0    | 0    | 0    | 0    | 0    | 0    | 0    | 0    | 0    | 0    | 0    | 0    | 0    | 0    | 0    | 0    |
| Pasteurella caballi                          | 0    | 0    | 0    | 0    | 0    | 0    | 0    | 0    | 0    | 0    | 0    | 0    | 0    | 0    | 0    | 0    | 0    | 0    | 0    | 0    | 0    | 0    |
| Fusobacterium hwasookii/nucleatum            | 0    | 0    | 0    | 0    | 0    | 0    | 0    | 0    | 0    | 0    | 0    | 0    | 0    | 0    | 0    | 0    | 0    | 0    | 0    | 0    | 0    | 0    |
| Corynebacterium riegelii                     | 0    | 0    | 0    | 0    | 0    | 0    | 0    | 0    | 0    | 0    | 0    | 0    | 0    | 0    | 0    | 0    | 0    | 0    | 0    | 0    | 0    | 0    |
| Hafnia                                       | 0    | 0    | 0    | 0    | 0    | 0    | 0    | 0    | 0    | 0    | 0    | 0    | 0    | 0    | 0    | 0    | 0    | 0    | 0    | 0    | 0    | 0    |
| Staphylococcus equorum/saprophyticus/xylosum | 0    | 0    | 0    | 0    | 0    | 0    | 0    | 0    | 0    | 0    | 0    | 0    | 0    | 0    | 0    | 122  | 0    | 0    | 0    | 0    | 0    | 0    |
| Acinetobacter lwoffii                        | 0    | 0    | 0    | 0    | 0    | 0    | 0    | 0    | 0    | 0    | 0    | 0    | 0    | 0    | 0    | 0    | 0    | 0    | 0    | 0    | 0    | 0    |
| Micrococcus cohnii                           | 0    | 0    | 0    | 0    | 0    | 33   | 0    | 0    | 0    | 0    | 0    | 0    | 0    | 0    | 0    | 0    | 0    | 0    | 0    | 0    | 0    | 0    |
| Pseudoclavibacter faecalis                   | 0    | 0    | 0    | 0    | 0    | 0    | 0    | 0    | 0    | 0    | 0    | 0    | 0    | 0    | 0    | 0    | 0    | 0    | 0    | 0    | 0    | 0    |
| Leptotrichia buccalis                        | 0    | 0    | 0    | 0    | 0    | 0    | 0    | 0    | 0    | 0    | 0    | 0    | 0    | 0    | 0    | 0    | 0    | 0    | 0    | 0    | 0    | 0    |
| Actinomyces                                  | 0    | 0    | 0    | 0    | 0    | 0    | 0    | 0    | 0    | 0    | 0    | 0    | 0    | 0    | 0    | 0    | 0    | 0    | 0    | 0    | 0    | 0    |
| Fusobacterium nucleatum/periodonticum        | 0    | 0    | 0    | 0    | 0    | 0    | 0    | 0    | 0    | 0    | 0    | 0    | 0    | 0    | 0    | 0    | 0    | 0    | 0    | 0    | 0    | 0    |
| Lactobacillus saerimneri                     | 0    | 0    | 0    | 0    | 0    | 0    | 0    | 0    | 0    | 0    | 0    | 0    | 0    | 0    | 0    | 0    | 0    | 0    | 0    | 0    | 0    | 0    |
| Actinomycetaceae                             | 0    | 0    | 0    | 0    | 0    | 0    | 0    | 0    | 0    | 0    | 0    | 0    | 0    | 0    | 0    | 0    | 0    | 0    | 0    | 0    | 0    | 0    |
| Dialister                                    | 0    | 0    | 0    | 0    | 0    | 0    | 0    | 0    | 0    | 0    | 0    | 0    | 0    | 0    | 0    | 0    | 0    | 0    | 0    | 0    | 0    | 0    |
| Neisseria mucosa/subflava                    | 0    | 0    | 0    | 0    | 0    | 0    | 0    | 0    | 0    | 0    | 0    | 0    | 0    | 0    | 0    | 0    | 0    | 0    | 0    | 0    | 0    | 0    |
| Paracoccus                                   | 0    | 0    | 0    | 0    | 0    | 0    | 0    | 0    | 0    | 0    | 0    | 0    | 0    | 0    | 0    | 0    | 0    | 0    | 0    | 0    | 0    | 0    |
| Acinetobacter haemolyticus/johnsonii         | 0    | 0    | 0    | 0    | 0    | 0    | 0    | 0    | 0    | 0    | 0    | 0    | 0    | 0    | 0    | 0    | 0    | 0    | 0    | 0    | 0    | 0    |
| Neisseria subflava                           | 0    | 0    | 0    | 0    | 0    | 0    | 0    | 0    | 0    | 0    | 0    | 0    | 0    | 0    | 0    | 0    | 0    | 0    | 0    | 0    | 0    | 0    |
| Acinetobacter proteolyticus                  | 0    | 0    | 0    | 0    | 29   | 0    | 0    | 0    | 0    | 0    | 0    | 0    | 0    | 0    | 0    | 0    | 0    | 0    | 0    | 0    | 0    | 0    |
| Dorea formicigenerans                        | 0    | 0    | 0    | 0    | 0    | 0    | 0    | 0    | 0    | 0    | 0    | 0    | 0    | 0    | 0    | 0    | 0    | 0    | 0    | 0    | 0    | 0    |
| Corynebacterium tuscaniense                  | 0    | 0    | 0    | 0    | 0    | 0    | 0    | 0    | 0    | 0    | 0    | 0    | 0    | 0    | 0    | 0    | 0    | 0    | 0    | 0    | 0    | 0    |
| Massiliomicrobiota timonensis                | 0    | 0    | 0    | 0    | 0    | 0    | 0    | 0    | 0    | 0    | 0    | 0    | 0    | 0    | 0    | 0    | 0    | 0    | 0    | 0    | 0    | 0    |
| Fusobacterium hwasookii                      | 0    | 0    | 0    | 0    | 0    | 0    | 0    | 0    | 0    | 0    | 0    | 0    | 0    | 0    | 0    | 0    | 0    | 0    | 0    | 0    | 0    | 0    |
| Pseudoglutamicibacter albus                  | 0    | 0    | 0    | 0    | 0    | 0    | 0    | 0    | 0    | 0    | 0    | 0    | 0    | 0    | 0    | 0    | 0    | 0    | 0    | 0    | 0    | 0    |
| Clostridiales Family XIII. Incertae Sedis    | 0    | 0    | 0    | 0    | 0    | 0    | 0    | 0    | 0    | 0    | 0    | 0    | 0    | 0    | 0    | 0    | 0    | 0    | 0    | 0    | 0    | 0    |
| Kocuria marina/rhizophila                    | 0    | 0    | 0    | 0    | 0    | 0    | 0    | 0    | 0    | 0    | 0    | 0    | 0    | 0    | 0    | 0    | 0    | 0    | 0    | 0    | 0    | 0    |
| Kocuria                                      | 0    | 0    | 0    | 0    | 0    | 0    | 0    | 0    | 0    | 0    | 0    | 0    | 0    | 0    | 0    | 0    | 0    | 0    | 0    | 0    | 0    | 0    |
| Alloprevotella rava                          | 0    | 0    | 0    | 0    | 0    | 0    | 0    | 0    | 0    | 0    | 0    | 0    | 0    | 0    | 0    | 0    | 0    | 0    | 0    | 0    | 0    | 0    |
| Staphylococcus pettenkoferi                  | 0    | 0    | 0    | 0    | 0    | 0    | 0    | 0    | 0    | 0    | 0    | 0    | 0    | 0    | 0    | 0    | 0    | 0    | 0    | 0    | 0    | 0    |
| Streptococcus pseudoporcinus                 | 0    | 0    | 0    | 0    | 0    | 0    | 0    | 0    | 0    | 0    | 0    | 0    | 0    | 0    | 0    | 0    | 0    | 0    | 0    | 0    | 0    | 0    |
| Kingella                                     | 0    | 0    | 0    | 0    | 0    | 0    | 0    | 0    | 0    | 0    | 0    | 0    | 0    | 0    | 0    | 0    | 0    | 0    | 0    | 0    | 0    | 0    |
| Eikenella                                    | 0    | 0    | 0    | 0    | 0    | 0    | 0    | 0    | 0    | 0    | 0    | 0    | 0    | 0    | 0    | 0    | 0    | 0    | 0    | 0    | 0    | 0    |
| Actinomyces odontolyticus                    | 0    | 0    | 0    | 0    | 0    | 0    | 0    | 0    | 0    | 0    | 0    | 0    | 0    | 0    | 0    | 0    | 0    | 0    | 0    | 0    | 0    | 0    |
| Corynebacterium sphenisci                    | 0    | 0    | 0    | 0    | 0    | 0    | 0    | 0    | 0    | 0    | 0    | 0    | 0    | 0    | 0    | 0    | 0    | 0    | 0    | 0    | 0    | 0    |
| Cutibacterium                                | 0    | 0    | 0    | 0    | 0    | 0    | 43   | 0    | 0    | 0    | 0    | 0    | 0    | 0    | 0    | 0    | 0    | 0    | 0    | 0    | 0    | 0    |
| Staphylococcus xylosum                       | 0    | 0    | 0    | 0    | 0    | 0    | 0    | 0    | 0    | 0    | 0    | 0    | 0    | 0    | 0    | 0    | 0    | 0    | 0    | 0    | 0    | 0    |
| Burkholderiales                              | 39   | 0    | 0    | 0    | 0    | 0    | 0    | 0    | 0    | 0    | 0    | 0    | 0    | 0    | 0    | 0    | 0    | 0    | 0    | 0    | 0    | 0    |
| Massiliomicrobiota/Mycoplasma                | 0    | 0    | 0    | 0    | 0    | 0    | 0    | 0    | 0    | 0    | 0    | 0    | 0    | 0    | 0    | 0    | 0    | 0    | 0    | 0    | 0    | 0    |
| Bacteroidales                                | 0    | 0    | 0    | 0    | 0    | 0    | 0    | 0    | 0    | 0    | 0    | 0    | 0    | 0    | 0    | 0    | 0    | 0    | 0    | 0    | 0    | 0    |
| Campylobacter fetus                          | 0    | 0    | 0    | 0    | 0    | 0    | 0    | 0    | 0    | 0    | 0    | 0    | 0    | 0    | 0    | 0    | 0    | 0    | 0    | 0    | 0    | 0    |
| Prevotella aurantiaca                        | 0    | 0    | 0    | 0    | 0    | 0    | 0    | 0    | 0    | 0    | 0    | 0    | 0    | 0    | 0    | 0    | 0    | 0    | 0    | 0    | 0    | 0    |
| Corynebacterium freneyi/xerosis              | 0    | 0    | 0    | 0    | 0    | 0    | 0    | 0    | 0    | 0    | 0    | 0    | 0    | 0    | 0    | 0    | 0    | 0    | 0    | 0    | 0    | 0    |
| Aerococcaceae                                | 0    | 0    | 0    | 0    | 0    | 0    | 0    | 0    | 0    | 0    | 0    | 0    | 0    | 0    | 0    | 0    | 0    | 0    | 0    | 0    | 0    | 0    |
| Moraxella lacunata                           | 0    | 0    | 0    | 0    | 0    | 0    | 0    | 0    | 0    | 0    | 0    | 0    | 0    | 0    | 0    | 0    | 0    | 0    | 0    | 0    | 0    | 0    |
| Corynebacterium accolens/macginleyi          | 0    | 0    | 0    | 0    | 0    | 0    | 0    | 0    | 0    | 0    | 0    | 0    | 0    | 0    | 0    | 0    | 0    | 0    | 0    | 0    | 0    | 0    |
| Massilia aurea                               | 0    | 0    | 0    | 0    | 0    | 0    | 0    | 0    | 0    | 0    | 0    | 0    | 0    | 0    | 0    | 0    | 0    | 0    | 0    | 0    | 0    | 0    |
| Corynebacterium casei                        | 0    | 0    | 0    | 0    | 0    | 0    | 0    | 0    | 0    | 0    | 0    | 0    | 0    | 0    | 0    | 0    | 0    | 0    | 0    | 0    | 0    | 0    |
| Helcococcus sueciensis                       | 0    | 0    | 0    | 0    | 0    | 0    | 0    | 0    | 0    | 0    | 0    | 0    | 0    | 0    | 0    | 0    | 0    | 0    | 0    | 0    | 0    | 0    |
| Lactobacillus casei/rhannosus                | 0    | 0    | 0    | 0    | 0    | 0    | 0    | 0    | 0    | 0    | 0    | 0    | 0    | 0    | 0    | 0    | 0    | 0    | 0    | 0    | 0    | 0    |
| Holdemanella biformis                        | 0    | 0    | 0    | 0    | 0    | 0    | 0    | 0    | 0    | 0    | 0    | 0    | 0    | 0    | 0    | 0    | 0    | 0    | 0    | 0    | 0    | 0    |
| Pelistega                                    | 0    | 0    | 0    | 0    | 0    | 0    | 0    | 0    | 0    | 0    | 0    | 0    | 0    | 0    | 0    | 0    | 0    | 0    | 0    | 0    | 0    | 0    |
| Actinomyces massiliensis                     | 0    | 0    | 0    | 0    | 0    | 0    | 0    | 0    | 0    | 0    | 0    | 0    | 0    | 0    | 0    | 0    | 0    | 0    | 0    | 0    | 0    | 0    |
| Massilia                                     | 0    | 0    | 0    | 0    | 0    | 0    | 0    | 0    | 0    | 0    | 0    | 0    | 0    | 0    | 0    | 0    | 0    | 0    | 0    | 0    | 0    | 0    |
| Staphylococcus equorum/xylosum               | 0    | 0    | 0    | 0    | 0    | 0    | 0    | 0    | 0    | 0    | 0    | 0    | 0    | 0    | 0    | 0    | 0    | 0    | 0    | 0    | 0    | 0    |
| Streptococcus                                | 0    | 0    | 0    | 0    | 0    | 0    | 0    | 0    | 0    | 0    | 0    | 0    | 0    | 0    | 0    | 0    | 0    | 0    | 0    | 0    | 0    | 0    |
| Cutibacterium avidum                         | 0    | 0    | 0    | 0    | 0    | 0    | 0    | 0    | 0    | 0    | 0    | 0    | 0    | 0    | 0    | 0    | 0    | 0    | 0    | 0    | 0    | 0    |

# Samples S143 - S171

| Species                                            | S143  | S144 | S145  | S146 | S147 | S148  | S151 | S153  | S154  | S155  | S156 | S157 | S158  | S160  | S162  | S163  | S165 | S166  | S167  | S168 | S169 | S171  |
|----------------------------------------------------|-------|------|-------|------|------|-------|------|-------|-------|-------|------|------|-------|-------|-------|-------|------|-------|-------|------|------|-------|
| Streptococcus mitis group                          | 0     | 1982 | 0     | 0    | 32   | 10543 | 1273 | 0     | 0     | 24419 | 5889 | 28   | 0     | 0     | 0     | 0     | 0    | 69229 | 124   | 0    | 880  | 7150  |
| Lactobacillus iners                                | 0     | 848  | 0     | 0    | 0    | 0     | 182  | 0     | 0     | 0     | 0    | 0    | 0     | 0     | 0     | 5853  | 71   | 102   | 67107 | 0    | 7574 | 13134 |
| Gardnerella vaginalis                              | 0     | 0    | 63343 | 3877 | 3945 | 0     | 6928 | 0     | 0     | 0     | 0    | 0    | 0     | 0     | 1141  | 30936 | 0    | 6942  | 582   | 4457 | 9529 |       |
| Corynebacterium pseudogenitalium/tuberculostrictum | 323   | 111  | 0     | 70   | 0    | 322   | 36   | 158   | 222   | 0     | 1165 | 137  | 300   | 226   | 38    | 0     | 0    | 526   | 1749  | 36   | 0    | 46    |
| Streptococcus agalactiae                           | 0     | 0    | 0     | 0    | 0    | 0     | 0    | 0     | 20073 | 0     | 184  | 0    | 0     | 0     | 119   | 0     | 0    | 0     | 0     | 0    | 639  | 848   |
| Veillonella montpellierensis                       | 0     | 0    | 34450 | 3326 | 2036 | 0     | 0    | 0     | 0     | 0     | 0    | 0    | 0     | 0     | 0     | 28807 | 0    | 0     | 0     | 0    | 5686 | 41989 |
| Streptococcus anginosus                            | 0     | 665  | 0     | 560  | 307  | 0     | 391  | 10931 | 0     | 0     | 0    | 0    | 13031 | 0     | 134   | 0     | 1937 | 801   | 2507  | 755  | 5354 | 4561  |
| Chlamydia trachomatis                              | 2100  | 0    | 0     | 0    | 0    | 0     | 204  | 0     | 0     | 0     | 0    | 0    | 0     | 11427 | 0     | 0     | 0    | 0     | 0     | 0    | 0    | 0     |
| Haemophilus parainfluenzae                         | 1759  | 0    | 0     | 0    | 0    | 0     | 0    | 0     | 0     | 48    | 0    | 0    | 0     | 0     | 3439  | 0     | 404  | 0     | 0     | 0    | 4547 | 33    |
| Finegoldia magna                                   | 1336  | 329  | 0     | 0    | 1556 | 129   | 296  | 1076  | 0     | 31    | 158  | 0    | 128   | 33    | 480   | 0     | 332  | 87    | 240   | 0    | 28   | 0     |
| Peptoniphilus asaccharolyticus/grossensis/harei    | 0     | 1226 | 0     | 233  | 1419 | 0     | 213  | 2390  | 0     | 0     | 2539 | 0    | 279   | 41    | 891   | 0     | 124  | 1296  | 88    | 1313 | 201  | 1934  |
| Sneathia amnii                                     | 0     | 0    | 0     | 4900 | 0    | 0     | 83   | 0     | 0     | 0     | 0    | 0    | 0     | 0     | 123   | 4103  | 0    | 0     | 194   | 0    | 0    | 0     |
| Staphylococcus caprae/cohnii/epidermidis           | 0     | 84   | 0     | 0    | 0    | 114   | 0    | 146   | 0     | 0     | 47   | 616  | 283   | 162   | 0     | 0     | 479  | 376   | 0     | 0    | 50   | 0     |
| Gemella haemolysans/taiwanensis                    | 0     | 29   | 0     | 0    | 0    | 653   | 404  | 0     | 0     | 0     | 0    | 0    | 0     | 0     | 0     | 0     | 99   | 122   | 0     | 301  | 0    | 0     |
| Sneathia sanguinigena                              | 0     | 0    | 0     | 0    | 2105 | 0     | 86   | 0     | 0     | 0     | 0    | 0    | 0     | 0     | 281   | 20862 | 0    | 0     | 360   | 270  | 0    | 0     |
| Mycoplasma genitalium                              | 0     | 0    | 0     | 0    | 0    | 0     | 0    | 0     | 0     | 0     | 0    | 0    | 0     | 0     | 0     | 0     | 0    | 0     | 0     | 0    | 0    | 0     |
| Mycoplasma penetrans                               | 0     | 0    | 0     | 0    | 0    | 0     | 0    | 0     | 0     | 0     | 0    | 0    | 0     | 1619  | 0     | 0     | 0    | 0     | 0     | 0    | 0    | 0     |
| Haemophilus haemolyticus/quentini                  | 0     | 0    | 0     | 0    | 0    | 0     | 25   | 0     | 0     | 220   | 0    | 0    | 0     | 0     | 0     | 0     | 0    | 0     | 492   | 0    | 0    | 0     |
| Corynebacterium pyruvicoproductum                  | 0     | 937  | 0     | 0    | 0    | 0     | 0    | 174   | 0     | 0     | 840  | 0    | 0     | 0     | 0     | 0     | 0    | 448   | 179   | 140  | 0    | 146   |
| Anaerococcus prevotii/tetradicus                   | 66    | 775  | 0     | 155  | 468  | 0     | 222  | 228   | 0     | 0     | 204  | 0    | 0     | 0     | 0     | 0     | 83   | 185   | 45    | 973  | 117  | 0     |
| Haemophilus influenzae                             | 0     | 0    | 0     | 0    | 0    | 0     | 0    | 0     | 0     | 0     | 0    | 0    | 0     | 0     | 15566 | 0     | 0    | 211   | 0     | 0    | 0    | 0     |
| Staphylococcus epidermidis/hominis                 | 195   | 0    | 0     | 0    | 0    | 51    | 0    | 0     | 0     | 0     | 0    | 139  | 157   | 0     | 0     | 0     | 0    | 0     | 283   | 0    | 0    | 69    |
| Atopobium vaginae                                  | 0     | 0    | 0     | 481  | 1084 | 0     | 1013 | 0     | 0     | 0     | 0    | 0    | 0     | 0     | 92    | 3216  | 0    | 0     | 0     | 0    | 0    | 0     |
| Ureaplasma parvum/urealyticum                      | 17902 | 0    | 0     | 0    | 49   | 0     | 190  | 1157  | 945   | 0     | 0    | 0    | 1914  | 0     | 0     | 67    | 129  | 74    | 0     | 0    | 884  | 0     |
| Prevotella timonensis                              | 0     | 389  | 0     | 330  | 1126 | 0     | 385  | 851   | 0     | 0     | 241  | 0    | 0     | 0     | 47    | 0     | 392  | 0     | 12506 | 0    | 1002 | 0     |
| Fenollaria massiliensis/timonensis                 | 0     | 0    | 0     | 0    | 870  | 31    | 0    | 0     | 0     | 0     | 0    | 0    | 0     | 0     | 0     | 0     | 0    | 0     | 0     | 0    | 0    | 0     |
| Anaerococcus                                       | 68    | 0    | 0     | 0    | 845  | 151   | 0    | 557   | 0     | 0     | 5395 | 0    | 0     | 0     | 29    | 0     | 0    | 0     | 174   | 36   | 0    | 0     |
| Corynebacterium coyleae                            | 0     | 0    | 0     | 0    | 224  | 0     | 0    | 0     | 0     | 0     | 95   | 0    | 0     | 0     | 1082  | 0     | 0    | 56    | 34    | 50   | 0    | 0     |
| Prevotella bivia                                   | 0     | 0    | 0     | 0    | 229  | 0     | 117  | 0     | 0     | 0     | 49   | 0    | 0     | 0     | 0     | 0     | 41   | 0     | 0     | 0    | 0    | 627   |
| Prevotella melaninogenica                          | 0     | 0    | 0     | 0    | 118  | 0     | 0    | 0     | 0     | 0     | 0    | 0    | 0     | 0     | 0     | 115   | 0    | 0     | 73    | 0    | 378  | 0     |
| Corynebacterium aurimucosum/minimum/singulare      | 0     | 0    | 0     | 301  | 0    | 218   | 0    | 76    | 0     | 25    | 265  | 31   | 71    | 136   | 0     | 0     | 0    | 183   | 152   | 0    | 160  | 0     |
| Staphylococcus aureus                              | 0     | 0    | 0     | 0    | 0    | 0     | 0    | 0     | 0     | 0     | 0    | 176  | 0     | 0     | 0     | 0     | 0    | 0     | 0     | 0    | 0    | 0     |
| Anaerococcus lactolyticus                          | 0     | 0    | 0     | 249  | 1162 | 0     | 0    | 57    | 0     | 0     | 0    | 0    | 100   | 0     | 0     | 0     | 38   | 2126  | 0     | 139  | 0    | 0     |
| Aerococcus christensenii                           | 0     | 0    | 0     | 559  | 42   | 0     | 353  | 0     | 0     | 0     | 0    | 0    | 0     | 0     | 0     | 0     | 338  | 0     | 0     | 36   | 0    | 0     |
| Corynebacterium glucuronolyticum                   | 0     | 377  | 0     | 0    | 422  | 0     | 0    | 0     | 0     | 0     | 0    | 0    | 0     | 0     | 0     | 0     | 0    | 0     | 0     | 0    | 0    | 112   |
| Veillonella atypica                                | 0     | 0    | 0     | 0    | 0    | 974   | 0    | 0     | 0     | 0     | 0    | 0    | 0     | 0     | 0     | 0     | 0    | 0     | 0     | 0    | 0    | 0     |
| Veillonella                                        | 0     | 0    | 0     | 0    | 0    | 0     | 0    | 0     | 0     | 0     | 0    | 0    | 0     | 0     | 0     | 0     | 0    | 0     | 0     | 0    | 0    | 0     |
| Mycoplasma hominis                                 | 0     | 0    | 0     | 220  | 214  | 0     | 0    | 0     | 0     | 0     | 0    | 0    | 0     | 0     | 0     | 0     | 50   | 0     | 0     | 0    | 0    | 0     |
| Granulicatella elegans                             | 0     | 0    | 0     | 0    | 0    | 0     | 0    | 0     | 0     | 0     | 0    | 0    | 0     | 0     | 0     | 0     | 0    | 0     | 0     | 515  | 88   | 0     |
| Ezakiella                                          | 0     | 212  | 0     | 0    | 3892 | 0     | 0    | 142   | 0     | 0     | 0    | 0    | 0     | 0     | 0     | 0     | 0    | 0     | 12248 | 0    | 0    | 0     |
| Shigella/Escherichia                               | 0     | 0    | 0     | 0    | 0    | 0     | 27   | 0     | 0     | 0     | 0    | 0    | 0     | 0     | 0     | 0     | 0    | 0     | 0     | 0    | 0    | 0     |
| Streptococcus salivarius                           | 0     | 0    | 0     | 0    | 0    | 108   | 0    | 0     | 0     | 0     | 0    | 0    | 0     | 0     | 0     | 0     | 0    | 0     | 0     | 0    | 0    | 0     |
| Actinomyces turicensis                             | 0     | 669  | 0     | 0    | 0    | 0     | 0    | 0     | 0     | 0     | 0    | 0    | 0     | 0     | 0     | 0     | 89   | 606   | 0     | 571  | 0    | 0     |
| Prevotella corporis                                | 0     | 0    | 0     | 0    | 0    | 0     | 0    | 0     | 0     | 0     | 0    | 0    | 0     | 0     | 0     | 0     | 0    | 0     | 0     | 0    | 0    | 0     |
| Corynebacterium simulans                           | 2046  | 0    | 0     | 0    | 0    | 0     | 0    | 0     | 0     | 0     | 0    | 0    | 0     | 0     | 0     | 0     | 0    | 0     | 0     | 0    | 0    | 0     |
| Fusobacterium equinum                              | 0     | 0    | 0     | 0    | 0    | 0     | 0    | 0     | 0     | 0     | 0    | 0    | 0     | 0     | 0     | 0     | 0    | 0     | 0     | 0    | 0    | 0     |
| Corynebacterium                                    | 0     | 36   | 0     | 0    | 0    | 0     | 0    | 69    | 0     | 0     | 64   | 0    | 0     | 0     | 40    | 0     | 0    | 0     | 33    | 65   | 0    | 0     |
| Staphylococcus haemolyticus                        | 858   | 0    | 0     | 0    | 0    | 60    | 309  | 209   | 0     | 40    | 2277 | 170  | 0     | 40    | 0     | 0     | 0    | 0     | 322   | 0    | 0    | 0     |
| Gemella asaccharolytica                            | 0     | 0    | 0     | 0    | 157  | 0     | 25   | 0     | 0     | 0     | 0    | 0    | 0     | 0     | 35    | 634   | 0    | 0     | 283   | 77   | 0    | 0     |
| Peptoniphilus                                      | 0     | 0    | 0     | 0    | 2037 | 0     | 0    | 0     | 0     | 0     | 0    | 0    | 0     | 0     | 0     | 0     | 128  | 0     | 141   | 0    | 0    | 0     |
| Corynebacterium hadale/imitans                     | 26    | 39   | 0     | 75   | 0    | 0     | 0    | 0     | 0     | 0     | 0    | 0    | 0     | 46    | 0     | 0     | 0    | 28    | 45    | 0    | 0    | 0     |
| Eggerthella sp. type 1 (species)                   | 0     | 0    | 0     | 416  | 324  | 0     | 258  | 0     | 0     | 0     | 0    | 0    | 0     | 0     | 0     | 1879  | 0    | 0     | 72    | 0    | 0    | 0     |
| Prevotella disiens                                 | 0     | 107  | 0     | 0    | 902  | 0     | 70   | 0     | 0     | 0     | 311  | 0    | 0     | 0     | 0     | 0     | 0    | 0     | 362   | 0    | 0    | 0     |
| Peptoniphilus lacrimalis                           | 0     | 0    | 0     | 0    | 53   | 0     | 0    | 0     | 0     | 0     | 0    | 0    | 0     | 0     | 0     | 0     | 0    | 0     | 1323  | 0    | 0    | 0     |
| Anaerococcus vaginalis                             | 0     | 63   | 0     | 0    | 273  | 0     | 0    | 114   | 0     | 0     | 828  | 0    | 52    | 0     | 0     | 0     | 0    | 0     | 215   | 0    | 157  | 0     |
| Facklamia hominis                                  | 0     | 88   | 0     | 0    | 47   | 0     | 0    | 0     | 0     | 0     | 3601 | 0    | 0     | 0     | 0     | 0     | 25   | 0     | 97    | 0    | 0    | 0     |
| Prevotella amnii                                   | 0     | 0    | 0     | 1513 | 2521 | 0     | 0    | 0     | 0     | 0     | 0    | 0    | 0     | 0     | 229   | 21096 | 0    | 0     | 0     | 0    | 0    | 0     |
| Campylobacter ureolyticus                          | 0     | 543  | 0     | 0    | 134  | 0     | 0    | 150   | 0     | 0     | 37   | 0    | 0     | 0     | 0     | 0     | 0    | 370   | 0     | 1997 | 0    | 686   |
| BVAB2 (species)                                    | 0     | 0    | 0     | 1697 | 1599 | 0     | 54   | 0     | 0     | 0     | 0    | 0    | 0     | 0     | 0     | 8246  | 0    | 0     | 292   | 0    | 0    | 0     |
| Haemophilus                                        | 0     | 0    | 0     | 0    | 0    | 0     | 0    | 0     | 0     | 0     | 0    | 0    | 0     | 0     | 0     | 347   | 0    | 1830  | 0     | 0    | 0    | 0     |
| Anaerococcus hydrogenalis/rubeifantus              | 0     | 48   | 0     | 0    | 263  | 0     | 0    | 0     | 0     | 0     | 753  | 0    | 0     | 0     | 0     | 0     | 0    | 122   | 39    | 0    | 0    | 0     |
| Anaerococcus mediterraneensis                      | 0     | 1150 | 0     | 0    | 438  | 0     | 0    | 0     | 0     | 0     | 170  | 0    | 5234  | 0     | 0     | 0     | 0    | 0     | 80    | 0    | 0    | 0     |
| Dialister sp. type 2                               | 0     | 735  | 0     | 665  | 1378 | 0     | 511  | 0     | 0     | 0     | 0    | 0    | 0     | 0     | 0     | 0     | 0    | 0     | 2183  | 0    | 0    | 0     |
| Dialister microaerophilus                          | 0     | 149  | 0     | 303  | 244  | 0     | 165  | 0     | 0     | 0     | 75   | 0    | 0     | 0     | 0     | 143   | 91   | 0     | 169   | 99   | 321  | 0     |
| Corynebacterium amycolatum                         | 0     | 0    | 0     | 0    | 0    | 0     | 0    | 0     | 0     | 0     | 28   | 0    | 0     | 0     | 0     | 0     | 0    | 0     | 0     | 0    | 0    | 0     |
| Ureaplasma                                         | 0     | 68   | 0     | 0    | 0    | 0     | 168  | 930   | 0     | 437   | 0    | 0    | 1314  | 0     | 0     | 67    | 88   | 76    | 0     | 0    | 599  | 0     |
| Enterococcus faecalis                              | 0     | 0    | 0     | 0    | 0    | 0     | 0    | 0     | 0     | 0     | 33   | 5065 | 0     | 0     | 0     | 0     | 0    | 0     | 0     | 0    | 0    | 0     |
| Parvimonas                                         | 0     | 0    | 0     | 0    | 0    | 0     | 0    | 0     | 0     | 0     | 0    | 0    | 0     | 0     | 0     | 0     | 0    | 0     | 0     | 3456 | 0    | 0     |
| Haemophilus pittmaniae                             | 0     | 0    | 0     | 0    | 0    | 0     | 0    | 0     | 0     | 0     | 0    | 0    | 0     | 0     | 0     | 0     | 0    | 0     | 0     | 0    | 0    | 0     |
| Actinomyces neuii                                  | 0     | 0    | 0     | 0    | 0    | 0     | 0    | 128   | 0     | 0     | 191  | 27   | 181   | 47    | 0     | 0     | 0    | 0     | 0     | 0    | 0    | 277   |

# Samples S143 - S171

| Species                                                | S143 | S144 | S145 | S146 | S147 | S148 | S151 | S153 | S154 | S155 | S156 | S157  | S158 | S160 | S162 | S163 | S165 | S166 | S167 | S168  | S169 | S171 |
|--------------------------------------------------------|------|------|------|------|------|------|------|------|------|------|------|-------|------|------|------|------|------|------|------|-------|------|------|
| Peptoniphilus rhintidis                                | 0    | 0    | 0    | 0    | 181  | 0    | 0    | 0    | 0    | 0    | 0    | 0     | 0    | 0    | 0    | 0    | 0    | 0    | 0    | 0     | 0    | 0    |
| Anaerococcus senegalensis                              | 74   | 0    | 0    | 0    | 0    | 27   | 0    | 0    | 0    | 0    | 0    | 0     | 0    | 0    | 0    | 0    | 0    | 0    | 0    | 0     | 0    | 0    |
| Peptostreptococcus anaerobius                          | 0    | 0    | 0    | 0    | 0    | 29   | 0    | 0    | 0    | 163  | 0    | 0     | 0    | 0    | 0    | 0    | 0    | 0    | 0    | 0     | 0    | 0    |
| Dialister propionificiens                              | 0    | 481  | 0    | 0    | 481  | 0    | 34   | 0    | 0    | 0    | 1404 | 0     | 0    | 0    | 0    | 0    | 0    | 185  | 0    | 0     | 0    | 0    |
| Peptoniphilus harei                                    | 0    | 0    | 0    | 0    | 1299 | 99   | 0    | 0    | 0    | 0    | 0    | 0     | 0    | 0    | 0    | 0    | 0    | 0    | 0    | 0     | 0    | 0    |
| Negativicoccus succinicivorans                         | 0    | 302  | 0    | 0    | 504  | 0    | 0    | 168  | 0    | 0    | 0    | 0     | 0    | 0    | 0    | 0    | 0    | 0    | 0    | 0     | 0    | 133  |
| Parvimonas micra                                       | 0    | 0    | 0    | 1619 | 304  | 0    | 65   | 0    | 0    | 0    | 0    | 0     | 0    | 0    | 0    | 0    | 744  | 0    | 0    | 0     | 0    | 0    |
| Actinomyces ihumii                                     | 0    | 252  | 0    | 0    | 55   | 0    | 0    | 36   | 0    | 0    | 141  | 0     | 0    | 0    | 0    | 0    | 0    | 126  | 0    | 0     | 0    | 122  |
| Actinotignum timonense                                 | 0    | 0    | 0    | 0    | 0    | 0    | 0    | 0    | 0    | 0    | 0    | 0     | 0    | 0    | 0    | 0    | 0    | 0    | 0    | 986   | 0    | 0    |
| Fenollaria                                             | 0    | 0    | 0    | 0    | 424  | 0    | 0    | 0    | 0    | 0    | 0    | 0     | 0    | 0    | 0    | 0    | 0    | 0    | 0    | 0     | 0    | 0    |
| Fusobacterium massiliense                              | 0    | 0    | 0    | 0    | 0    | 0    | 0    | 0    | 0    | 0    | 0    | 0     | 0    | 0    | 0    | 0    | 0    | 0    | 0    | 0     | 0    | 0    |
| Actinobaculum massiliense                              | 0    | 2999 | 0    | 0    | 0    | 0    | 0    | 1026 | 0    | 0    | 129  | 0     | 0    | 0    | 0    | 0    | 110  | 0    | 0    | 0     | 0    | 0    |
| Peptoniphilus coxii                                    | 0    | 0    | 0    | 0    | 689  | 0    | 0    | 0    | 0    | 0    | 152  | 0     | 0    | 0    | 0    | 0    | 0    | 0    | 0    | 718   | 0    | 0    |
| Staphylococcus lugdunensis                             | 0    | 0    | 0    | 0    | 0    | 0    | 0    | 0    | 0    | 0    | 0    | 0     | 0    | 0    | 0    | 0    | 0    | 0    | 0    | 0     | 0    | 0    |
| Dermabacter                                            | 0    | 0    | 0    | 0    | 0    | 0    | 0    | 0    | 0    | 0    | 0    | 0     | 0    | 49   | 0    | 0    | 0    | 0    | 0    | 0     | 0    | 0    |
| Alloscardovia omnicolens                               | 0    | 375  | 0    | 0    | 0    | 0    | 0    | 0    | 0    | 0    | 0    | 0     | 0    | 0    | 0    | 0    | 29   | 0    | 0    | 0     | 0    | 0    |
| Varibaculum cambriense                                 | 0    | 0    | 0    | 0    | 109  | 0    | 0    | 28   | 0    | 0    | 165  | 0     | 0    | 0    | 0    | 0    | 0    | 109  | 0    | 132   | 0    | 209  |
| Streptococcus urinialis                                | 0    | 0    | 0    | 0    | 0    | 0    | 0    | 0    | 0    | 0    | 0    | 0     | 0    | 0    | 48   | 0    | 0    | 0    | 0    | 0     | 0    | 0    |
| Corynebacterium appendicis                             | 0    | 0    | 0    | 38   | 0    | 132  | 0    | 0    | 0    | 0    | 0    | 0     | 0    | 0    | 0    | 0    | 0    | 0    | 0    | 0     | 0    | 0    |
| Actinotignum schaalii                                  | 0    | 388  | 0    | 0    | 32   | 0    | 0    | 34   | 0    | 0    | 76   | 0     | 119  | 0    | 40   | 0    | 0    | 221  | 0    | 0     | 0    | 6983 |
| Corynebacterium timonense                              | 0    | 0    | 72   | 0    | 0    | 0    | 0    | 0    | 0    | 0    | 246  | 0     | 89   | 0    | 0    | 0    | 0    | 79   | 286  | 0     | 0    | 0    |
| Gemella                                                | 0    | 0    | 0    | 0    | 0    | 0    | 0    | 0    | 0    | 0    | 0    | 0     | 0    | 0    | 0    | 0    | 0    | 0    | 0    | 0     | 0    | 0    |
| Klebsiella aerogenes/Enterobacter asburiae             | 0    | 0    | 0    | 0    | 0    | 0    | 0    | 0    | 0    | 0    | 0    | 28054 | 0    | 0    | 0    | 0    | 0    | 0    | 0    | 0     | 0    | 0    |
| Fusobacterium periodonticum                            | 0    | 0    | 0    | 0    | 0    | 0    | 0    | 0    | 0    | 0    | 0    | 0     | 0    | 0    | 0    | 0    | 25   | 0    | 0    | 0     | 0    | 0    |
| Veillonella dispar                                     | 0    | 0    | 0    | 0    | 0    | 0    | 0    | 0    | 0    | 0    | 0    | 0     | 0    | 0    | 0    | 0    | 0    | 0    | 0    | 0     | 0    | 0    |
| Prevotella colorans                                    | 0    | 0    | 0    | 0    | 0    | 0    | 0    | 0    | 0    | 0    | 37   | 0     | 0    | 0    | 0    | 0    | 0    | 0    | 0    | 0     | 0    | 0    |
| Candidatus Peptoniphilus massiliensis                  | 0    | 0    | 0    | 0    | 102  | 0    | 0    | 0    | 0    | 0    | 0    | 0     | 0    | 0    | 0    | 0    | 0    | 0    | 0    | 0     | 0    | 0    |
| Eremococcus                                            | 0    | 0    | 0    | 0    | 0    | 0    | 0    | 0    | 0    | 0    | 0    | 0     | 0    | 0    | 0    | 0    | 0    | 0    | 0    | 0     | 0    | 0    |
| Varibaculum anthropi                                   | 0    | 0    | 0    | 0    | 70   | 0    | 0    | 332  | 0    | 0    | 0    | 0     | 0    | 0    | 0    | 0    | 0    | 0    | 0    | 9804  | 0    | 0    |
| Propionimicrobium lymphophilum                         | 0    | 0    | 0    | 0    | 84   | 0    | 0    | 387  | 0    | 0    | 0    | 0     | 0    | 0    | 0    | 0    | 0    | 273  | 0    | 244   | 0    | 168  |
| Streptococcus dysgalactiae                             | 0    | 0    | 0    | 0    | 0    | 0    | 0    | 0    | 0    | 0    | 0    | 0     | 0    | 0    | 0    | 0    | 0    | 0    | 0    | 0     | 0    | 0    |
| Negativicoccus                                         | 0    | 0    | 0    | 0    | 1260 | 0    | 0    | 0    | 0    | 0    | 0    | 0     | 0    | 0    | 0    | 0    | 109  | 0    | 0    | 2688  | 0    | 136  |
| Porphyromonas somerae                                  | 0    | 0    | 0    | 0    | 0    | 0    | 0    | 0    | 0    | 0    | 0    | 0     | 0    | 0    | 0    | 0    | 0    | 0    | 0    | 13460 | 0    | 0    |
| Corynebacterium jeikeium                               | 0    | 0    | 0    | 60   | 0    | 0    | 0    | 0    | 0    | 0    | 0    | 0     | 0    | 0    | 0    | 0    | 0    | 0    | 0    | 0     | 0    | 0    |
| Mobiluncus curtisii                                    | 0    | 0    | 0    | 0    | 0    | 0    | 0    | 0    | 0    | 0    | 0    | 0     | 0    | 0    | 0    | 0    | 0    | 0    | 0    | 250   | 0    | 0    |
| Porphyromonas uenonis                                  | 0    | 0    | 0    | 0    | 639  | 0    | 0    | 0    | 0    | 0    | 0    | 0     | 0    | 0    | 0    | 0    | 0    | 41   | 0    | 1508  | 0    | 90   |
| Aerococcus urinae                                      | 0    | 0    | 0    | 0    | 0    | 0    | 0    | 0    | 0    | 0    | 0    | 0     | 0    | 0    | 0    | 0    | 0    | 211  | 0    | 0     | 0    | 0    |
| Corynebacterium mycetoides                             | 0    | 0    | 0    | 0    | 0    | 0    | 0    | 0    | 0    | 0    | 0    | 0     | 0    | 0    | 0    | 0    | 0    | 177  | 0    | 0     | 0    | 0    |
| Cutibacterium acnes                                    | 0    | 0    | 0    | 0    | 0    | 0    | 0    | 0    | 0    | 0    | 0    | 0     | 0    | 0    | 0    | 0    | 0    | 0    | 0    | 0     | 0    | 0    |
| Urinacoccus massiliensis                               | 0    | 0    | 0    | 0    | 1022 | 0    | 0    | 28   | 0    | 0    | 0    | 0     | 0    | 0    | 0    | 0    | 0    | 37   | 0    | 496   | 0    | 0    |
| Campylobacter hominis                                  | 0    | 0    | 0    | 0    | 0    | 0    | 0    | 0    | 0    | 0    | 0    | 0     | 0    | 0    | 0    | 0    | 0    | 0    | 0    | 0     | 0    | 0    |
| Staphylococcus capitis/caprae                          | 0    | 0    | 0    | 0    | 0    | 0    | 0    | 0    | 0    | 0    | 0    | 88    | 0    | 0    | 0    | 0    | 0    | 0    | 0    | 0     | 0    | 0    |
| Sneathia                                               | 0    | 0    | 0    | 0    | 0    | 0    | 0    | 0    | 0    | 0    | 0    | 0     | 0    | 0    | 0    | 0    | 1557 | 0    | 0    | 9134  | 0    | 0    |
| Prevotella jejuni                                      | 0    | 0    | 0    | 0    | 0    | 0    | 0    | 0    | 0    | 0    | 0    | 0     | 0    | 0    | 0    | 0    | 0    | 0    | 0    | 0     | 0    | 0    |
| Varibaculum                                            | 0    | 0    | 0    | 0    | 0    | 0    | 0    | 0    | 0    | 0    | 0    | 0     | 0    | 0    | 0    | 0    | 0    | 0    | 0    | 0     | 0    | 1445 |
| Corynebacterium striatum                               | 0    | 0    | 0    | 0    | 0    | 0    | 0    | 0    | 0    | 0    | 0    | 0     | 0    | 0    | 0    | 0    | 0    | 0    | 0    | 0     | 0    | 0    |
| Jonquetella anthropi                                   | 0    | 0    | 0    | 0    | 0    | 0    | 0    | 0    | 0    | 0    | 0    | 0     | 0    | 0    | 0    | 0    | 0    | 0    | 0    | 0     | 0    | 0    |
| Peptoniphilus koenoenariae                             | 0    | 0    | 0    | 0    | 0    | 0    | 0    | 0    | 0    | 0    | 0    | 0     | 0    | 0    | 0    | 0    | 0    | 0    | 0    | 34    | 0    | 29   |
| Bifidobacterium longum                                 | 0    | 0    | 0    | 0    | 0    | 0    | 0    | 0    | 0    | 0    | 0    | 0     | 0    | 0    | 0    | 0    | 0    | 0    | 0    | 0     | 0    | 0    |
| Helicobacter                                           | 0    | 0    | 0    | 0    | 0    | 0    | 0    | 0    | 0    | 0    | 0    | 0     | 0    | 0    | 0    | 0    | 0    | 0    | 0    | 0     | 0    | 0    |
| Lawsonella clevelandensis                              | 0    | 0    | 0    | 0    | 61   | 0    | 80   | 0    | 0    | 0    | 0    | 0     | 0    | 0    | 0    | 0    | 0    | 0    | 0    | 127   | 0    | 0    |
| Escherichia coli/fergusonii                            | 0    | 0    | 0    | 0    | 0    | 0    | 0    | 0    | 0    | 0    | 0    | 0     | 0    | 0    | 0    | 0    | 0    | 0    | 0    | 0     | 0    | 0    |
| Fusobacterium nucleatum                                | 0    | 0    | 0    | 0    | 0    | 0    | 379  | 0    | 0    | 0    | 0    | 0     | 0    | 0    | 0    | 0    | 0    | 0    | 0    | 6502  | 0    | 165  |
| Porphyromonas asaccharolytica                          | 0    | 0    | 0    | 0    | 0    | 0    | 0    | 0    | 0    | 0    | 0    | 0     | 0    | 0    | 0    | 0    | 0    | 0    | 0    | 205   | 0    | 0    |
| Anaerococcus octavius                                  | 0    | 0    | 0    | 0    | 0    | 213  | 0    | 0    | 0    | 0    | 0    | 0     | 0    | 0    | 0    | 0    | 0    | 0    | 0    | 0     | 0    | 0    |
| Fusobacterium                                          | 0    | 0    | 0    | 0    | 0    | 0    | 0    | 0    | 0    | 0    | 0    | 0     | 0    | 0    | 0    | 0    | 0    | 0    | 0    | 0     | 0    | 0    |
| Corynebacterium phoceense                              | 0    | 0    | 0    | 0    | 0    | 0    | 0    | 0    | 0    | 0    | 0    | 0     | 0    | 0    | 0    | 0    | 0    | 0    | 0    | 0     | 0    | 0    |
| Ruminococcus                                           | 0    | 0    | 0    | 0    | 158  | 0    | 0    | 0    | 0    | 0    | 0    | 0     | 0    | 0    | 0    | 0    | 0    | 0    | 0    | 0     | 0    | 0    |
| Arcanobacterium                                        | 0    | 0    | 0    | 0    | 157  | 0    | 0    | 0    | 0    | 0    | 0    | 0     | 0    | 0    | 0    | 0    | 41   | 0    | 0    | 0     | 0    | 75   |
| Khoudiadiopia                                          | 0    | 0    | 0    | 0    | 54   | 0    | 0    | 0    | 0    | 0    | 0    | 0     | 0    | 0    | 0    | 0    | 0    | 0    | 0    | 257   | 0    | 0    |
| Atopobium deltae                                       | 0    | 322  | 0    | 0    | 205  | 0    | 0    | 0    | 0    | 0    | 0    | 0     | 0    | 0    | 0    | 0    | 0    | 0    | 0    | 93    | 0    | 0    |
| Haemophilus parahaemolyticus                           | 0    | 0    | 0    | 0    | 0    | 0    | 0    | 0    | 0    | 0    | 0    | 0     | 0    | 0    | 0    | 0    | 0    | 0    | 0    | 0     | 0    | 0    |
| Howardella                                             | 0    | 0    | 0    | 0    | 0    | 0    | 0    | 0    | 0    | 0    | 0    | 0     | 0    | 0    | 0    | 0    | 0    | 0    | 0    | 97    | 0    | 192  |
| Prevotella buccalis                                    | 0    | 308  | 0    | 0    | 160  | 0    | 0    | 0    | 0    | 0    | 101  | 0     | 0    | 0    | 0    | 0    | 0    | 0    | 0    | 131   | 0    | 0    |
| Corynebacterium auris                                  | 0    | 0    | 0    | 0    | 0    | 0    | 0    | 0    | 0    | 0    | 67   | 0     | 0    | 0    | 0    | 0    | 0    | 0    | 621  | 0     | 0    | 0    |
| Candidatus Mycoplasma gireddii                         | 0    | 0    | 0    | 0    | 0    | 0    | 0    | 0    | 0    | 0    | 0    | 0     | 0    | 0    | 0    | 0    | 0    | 0    | 0    | 0     | 0    | 0    |
| Alloicoccus                                            | 0    | 0    | 0    | 0    | 0    | 0    | 0    | 0    | 0    | 0    | 0    | 0     | 0    | 0    | 0    | 0    | 0    | 0    | 0    | 0     | 0    | 0    |
| Corynebacterium founierii/mucifaciens/ureicelerivorans | 0    | 0    | 0    | 0    | 0    | 172  | 0    | 0    | 0    | 0    | 58   | 0     | 0    | 0    | 0    | 0    | 0    | 0    | 0    | 0     | 0    | 0    |
| Corynebacterium auris/timonense                        | 0    | 0    | 0    | 0    | 0    | 0    | 0    | 0    | 0    | 0    | 0    | 0     | 0    | 0    | 0    | 0    | 0    | 0    | 0    | 0     | 0    | 0    |
| Veillonella ratti/seminalis                            | 0    | 0    | 0    | 0    | 0    | 0    | 0    | 0    | 0    | 0    | 0    | 0     | 0    | 0    | 0    | 0    | 0    | 0    | 0    | 0     | 0    | 0    |

# Samples S143 - S171

| Species                                    | S143 | S144 | S145 | S146 | S147 | S148 | S151 | S153 | S154 | S155 | S156 | S157 | S158 | S160 | S162 | S163 | S165 | S166 | S167 | S168 | S169 | S171 |
|--------------------------------------------|------|------|------|------|------|------|------|------|------|------|------|------|------|------|------|------|------|------|------|------|------|------|
| Lactobacillus gasserii                     | 0    | 0    | 0    | 0    | 0    | 0    | 0    | 0    | 0    | 0    | 0    | 0    | 0    | 0    | 0    | 0    | 0    | 0    | 0    | 0    | 27   | 0    |
| Tissierella                                | 0    | 0    | 0    | 0    | 0    | 0    | 0    | 0    | 0    | 0    | 0    | 0    | 0    | 0    | 0    | 0    | 0    | 0    | 0    | 167  | 0    | 0    |
| Granulicatella adiacens                    | 0    | 0    | 0    | 0    | 0    | 0    | 0    | 0    | 0    | 0    | 0    | 0    | 0    | 0    | 0    | 0    | 0    | 0    | 0    | 0    | 0    | 0    |
| Sutterella                                 | 0    | 0    | 0    | 0    | 69   | 0    | 42   | 0    | 0    | 0    | 0    | 0    | 0    | 0    | 0    | 0    | 0    | 0    | 0    | 0    | 0    | 0    |
| Prevotella nanceiensis                     | 0    | 0    | 0    | 0    | 0    | 0    | 0    | 0    | 0    | 0    | 0    | 0    | 0    | 0    | 0    | 0    | 0    | 0    | 0    | 0    | 0    | 0    |
| Lactobacillus jensenii                     | 0    | 0    | 0    | 0    | 0    | 0    | 0    | 0    | 0    | 0    | 0    | 0    | 0    | 0    | 0    | 0    | 0    | 0    | 0    | 0    | 304  | 0    |
| Lactobacillus crispatus                    | 0    | 0    | 0    | 0    | 0    | 0    | 0    | 0    | 0    | 0    | 0    | 0    | 0    | 0    | 0    | 0    | 0    | 0    | 0    | 0    | 645  | 0    |
| Candidate Division TM7 vaginal (genus)     | 0    | 0    | 0    | 0    | 0    | 0    | 0    | 0    | 0    | 0    | 0    | 0    | 0    | 0    | 0    | 0    | 0    | 0    | 0    | 0    | 0    | 0    |
| Candidatus Saccharimonas                   | 0    | 203  | 0    | 0    | 0    | 0    | 0    | 0    | 0    | 462  | 0    | 0    | 0    | 0    | 0    | 0    | 0    | 2754 | 0    | 0    | 0    | 0    |
| Peptococcus niger                          | 0    | 0    | 0    | 0    | 0    | 0    | 0    | 0    | 0    | 0    | 0    | 0    | 0    | 0    | 0    | 0    | 0    | 0    | 0    | 33   | 0    | 0    |
| Neisseria flavescens/perflava              | 0    | 0    | 0    | 0    | 0    | 0    | 0    | 0    | 0    | 0    | 0    | 0    | 0    | 0    | 0    | 0    | 0    | 0    | 0    | 0    | 0    | 0    |
| Gemella sanguinis                          | 0    | 0    | 0    | 0    | 0    | 0    | 0    | 0    | 0    | 0    | 0    | 0    | 0    | 0    | 0    | 0    | 0    | 0    | 0    | 0    | 0    | 0    |
| Porphyromonas                              | 0    | 0    | 0    | 0    | 175  | 0    | 0    | 0    | 0    | 0    | 0    | 0    | 5    | 0    | 0    | 0    | 0    | 25   | 0    | 1543 | 0    | 0    |
| Prevotella                                 | 0    | 0    | 0    | 0    | 0    | 0    | 0    | 0    | 0    | 0    | 0    | 0    | 0    | 0    | 0    | 0    | 0    | 0    | 0    | 0    | 0    | 0    |
| Corynebacterium thomssenii                 | 0    | 0    | 0    | 0    | 0    | 0    | 0    | 0    | 0    | 0    | 0    | 0    | 0    | 0    | 0    | 0    | 0    | 0    | 0    | 0    | 0    | 0    |
| Lachnospiraceae                            | 0    | 0    | 0    | 0    | 0    | 0    | 0    | 0    | 0    | 0    | 0    | 0    | 0    | 0    | 0    | 0    | 0    | 0    | 0    | 0    | 0    | 0    |
| Corynebacterium tuberculoostearicum        | 0    | 0    | 0    | 0    | 0    | 0    | 0    | 58   | 0    | 0    | 0    | 0    | 0    | 0    | 0    | 0    | 0    | 0    | 0    | 0    | 0    | 0    |
| Dermabacter hominis                        | 0    | 0    | 0    | 0    | 0    | 0    | 0    | 0    | 0    | 0    | 0    | 0    | 0    | 0    | 0    | 0    | 0    | 0    | 0    | 0    | 0    | 0    |
| Veillonella rogosae                        | 0    | 0    | 0    | 0    | 0    | 0    | 0    | 0    | 0    | 0    | 0    | 0    | 0    | 0    | 0    | 0    | 0    | 0    | 0    | 0    | 0    | 0    |
| Actinomyces hongkongensis                  | 0    | 0    | 0    | 0    | 0    | 0    | 0    | 0    | 0    | 0    | 0    | 0    | 0    | 0    | 0    | 0    | 87   | 0    | 0    | 0    | 0    | 0    |
| Veillonella parvula/rogosae                | 0    | 0    | 0    | 0    | 0    | 0    | 0    | 0    | 0    | 0    | 0    | 0    | 0    | 0    | 0    | 0    | 0    | 0    | 0    | 0    | 0    | 0    |
| Anaerococcus provencensis                  | 0    | 0    | 0    | 0    | 25   | 100  | 0    | 0    | 0    | 0    | 0    | 0    | 0    | 0    | 0    | 0    | 0    | 0    | 0    | 0    | 0    | 0    |
| Porphyromonas sp. type 1                   | 0    | 0    | 0    | 0    | 0    | 0    | 0    | 0    | 0    | 0    | 0    | 0    | 0    | 0    | 0    | 0    | 0    | 0    | 0    | 35   | 0    | 33   |
| Brevibacterium paucivorans                 | 0    | 0    | 0    | 35   | 0    | 0    | 0    | 0    | 0    | 0    | 0    | 0    | 0    | 0    | 0    | 0    | 0    | 0    | 0    | 0    | 0    | 0    |
| Peptostreptococcus                         | 0    | 0    | 0    | 0    | 0    | 0    | 0    | 0    | 0    | 0    | 0    | 0    | 0    | 0    | 0    | 0    | 0    | 0    | 0    | 243  | 0    | 0    |
| Facklamia languida                         | 0    | 0    | 0    | 0    | 0    | 0    | 0    | 0    | 0    | 0    | 0    | 0    | 0    | 0    | 0    | 0    | 0    | 0    | 0    | 0    | 0    | 0    |
| Streptobacillus                            | 0    | 0    | 0    | 0    | 0    | 0    | 0    | 0    | 0    | 0    | 0    | 0    | 0    | 0    | 0    | 0    | 0    | 0    | 0    | 0    | 0    | 0    |
| Gemella haemolysans                        | 0    | 0    | 0    | 0    | 0    | 0    | 0    | 0    | 0    | 0    | 0    | 0    | 0    | 0    | 0    | 0    | 0    | 0    | 0    | 0    | 0    | 0    |
| Haemophilus sputorum                       | 0    | 0    | 0    | 0    | 0    | 0    | 0    | 0    | 0    | 0    | 0    | 0    | 0    | 0    | 0    | 0    | 48   | 0    | 0    | 0    | 0    | 0    |
| Actinotignum urinale                       | 0    | 0    | 0    | 0    | 0    | 0    | 0    | 0    | 0    | 0    | 0    | 0    | 0    | 0    | 0    | 0    | 0    | 0    | 0    | 0    | 0    | 0    |
| Dialister pneumosintes                     | 0    | 0    | 0    | 0    | 0    | 0    | 0    | 0    | 0    | 0    | 0    | 0    | 0    | 0    | 0    | 0    | 0    | 0    | 0    | 0    | 0    | 0    |
| Treponema pallidum                         | 0    | 0    | 0    | 0    | 0    | 0    | 0    | 0    | 0    | 0    | 0    | 0    | 0    | 0    | 0    | 0    | 0    | 0    | 0    | 0    | 0    | 0    |
| Porphyromonas bennoni                      | 0    | 0    | 0    | 0    | 2965 | 0    | 0    | 0    | 0    | 0    | 0    | 0    | 0    | 0    | 0    | 0    | 0    | 0    | 0    | 51   | 0    | 0    |
| Bergeyella                                 | 0    | 0    | 0    | 0    | 0    | 0    | 0    | 0    | 0    | 0    | 0    | 0    | 0    | 0    | 0    | 0    | 0    | 0    | 0    | 0    | 0    | 0    |
| Actinotignum schaalii/timonense            | 0    | 0    | 0    | 0    | 0    | 0    | 0    | 0    | 0    | 0    | 0    | 0    | 0    | 0    | 0    | 0    | 0    | 0    | 0    | 0    | 0    | 0    |
| Klebsiella aerogenes/Kluyvera cryocrescens | 0    | 0    | 0    | 0    | 0    | 0    | 0    | 0    | 0    | 0    | 0    | 3640 | 0    | 0    | 0    | 0    | 0    | 0    | 0    | 0    | 0    | 0    |
| Rothia mucilaginos                         | 0    | 0    | 0    | 0    | 0    | 0    | 0    | 0    | 0    | 0    | 0    | 0    | 0    | 0    | 0    | 0    | 0    | 0    | 0    | 0    | 0    | 0    |
| Solobacterium moorei                       | 0    | 0    | 0    | 0    | 0    | 0    | 0    | 0    | 0    | 0    | 0    | 0    | 0    | 0    | 0    | 0    | 0    | 0    | 0    | 0    | 0    | 0    |
| Mageeibacillus indolicus                   | 0    | 0    | 0    | 0    | 0    | 0    | 0    | 0    | 0    | 0    | 0    | 0    | 0    | 0    | 0    | 0    | 56   | 0    | 0    | 0    | 0    | 0    |
| Serratia urelytica                         | 0    | 0    | 0    | 0    | 0    | 0    | 0    | 0    | 0    | 0    | 0    | 0    | 0    | 0    | 0    | 0    | 0    | 0    | 0    | 0    | 0    | 0    |
| Peptoniphilus obesi                        | 0    | 0    | 0    | 0    | 911  | 0    | 0    | 0    | 0    | 0    | 0    | 0    | 0    | 0    | 0    | 0    | 0    | 0    | 0    | 159  | 0    | 0    |
| Peptoniphilus harei/phoceensis             | 0    | 0    | 0    | 0    | 0    | 0    | 0    | 0    | 0    | 0    | 0    | 0    | 0    | 0    | 0    | 0    | 0    | 0    | 0    | 0    | 0    | 0    |
| Corynebacterium atypicum                   | 0    | 0    | 0    | 0    | 0    | 0    | 0    | 0    | 0    | 0    | 0    | 0    | 0    | 0    | 0    | 0    | 0    | 0    | 0    | 0    | 0    | 0    |
| Atopobium minutum                          | 0    | 0    | 0    | 0    | 0    | 0    | 0    | 0    | 0    | 0    | 0    | 0    | 0    | 0    | 0    | 0    | 0    | 0    | 0    | 0    | 0    | 0    |
| Corynebacterium genitalium                 | 0    | 0    | 0    | 0    | 0    | 0    | 0    | 0    | 0    | 0    | 0    | 0    | 0    | 0    | 0    | 0    | 0    | 0    | 0    | 0    | 0    | 0    |
| Bifidobacterium tsurumense                 | 0    | 0    | 0    | 0    | 0    | 0    | 0    | 0    | 0    | 0    | 0    | 0    | 0    | 0    | 0    | 0    | 0    | 0    | 0    | 0    | 0    | 0    |
| Micrococcus                                | 0    | 0    | 0    | 0    | 0    | 0    | 0    | 0    | 0    | 0    | 0    | 0    | 0    | 0    | 0    | 0    | 0    | 0    | 59   | 0    | 0    | 0    |
| Megasphaera genomsp. type_1                | 0    | 0    | 0    | 0    | 0    | 0    | 557  | 0    | 0    | 0    | 0    | 0    | 0    | 0    | 0    | 40   | 0    | 0    | 0    | 0    | 0    | 0    |
| Enhydrobacter                              | 0    | 0    | 0    | 0    | 0    | 0    | 0    | 0    | 0    | 0    | 0    | 0    | 0    | 0    | 0    | 0    | 0    | 0    | 0    | 0    | 0    | 0    |
| Fastidiosipila sanguinis                   | 0    | 0    | 0    | 0    | 85   | 0    | 0    | 0    | 0    | 0    | 0    | 0    | 0    | 0    | 0    | 0    | 0    | 0    | 0    | 501  | 0    | 0    |
| Prevotellamassilia                         | 0    | 0    | 0    | 0    | 0    | 0    | 0    | 0    | 0    | 0    | 0    | 0    | 0    | 0    | 0    | 0    | 0    | 43   | 0    | 0    | 0    | 0    |
| Peptostreptococcaceae                      | 0    | 0    | 0    | 0    | 0    | 0    | 0    | 0    | 0    | 0    | 0    | 0    | 0    | 0    | 0    | 0    | 0    | 0    | 0    | 0    | 0    | 0    |
| Morganella morganii                        | 0    | 0    | 0    | 0    | 0    | 0    | 0    | 0    | 0    | 0    | 0    | 0    | 0    | 0    | 0    | 0    | 0    | 0    | 0    | 0    | 0    | 0    |
| Neofamilia                                 | 0    | 0    | 0    | 0    | 0    | 0    | 0    | 0    | 0    | 0    | 0    | 0    | 0    | 0    | 0    | 0    | 0    | 0    | 0    | 0    | 0    | 0    |
| Pseudoclavibacter bifida                   | 0    | 0    | 0    | 0    | 0    | 0    | 0    | 0    | 0    | 0    | 0    | 0    | 0    | 0    | 0    | 0    | 0    | 0    | 0    | 0    | 0    | 0    |
| Helcococcus                                | 0    | 0    | 0    | 0    | 0    | 0    | 0    | 0    | 0    | 0    | 0    | 0    | 0    | 0    | 0    | 0    | 0    | 0    | 0    | 0    | 0    | 0    |
| Brevibacterium ravenspurgense              | 0    | 0    | 0    | 0    | 0    | 0    | 0    | 0    | 0    | 0    | 0    | 0    | 0    | 0    | 0    | 0    | 0    | 0    | 0    | 0    | 0    | 0    |
| Moryella indoligenes                       | 0    | 0    | 0    | 0    | 0    | 0    | 0    | 0    | 0    | 0    | 0    | 0    | 0    | 0    | 0    | 0    | 0    | 0    | 0    | 0    | 0    | 0    |
| Olegusella massiliensis                    | 0    | 0    | 0    | 0    | 0    | 0    | 0    | 0    | 0    | 0    | 0    | 0    | 0    | 0    | 0    | 0    | 0    | 0    | 0    | 0    | 0    | 0    |
| Morococcus cerebrosus                      | 0    | 0    | 0    | 0    | 0    | 0    | 0    | 0    | 0    | 0    | 0    | 0    | 0    | 0    | 0    | 0    | 0    | 0    | 0    | 0    | 0    | 0    |
| Prevotella scopos                          | 0    | 0    | 0    | 0    | 0    | 0    | 0    | 0    | 0    | 0    | 0    | 0    | 0    | 0    | 0    | 0    | 0    | 0    | 0    | 0    | 0    | 0    |
| Veillonella parvula/tobetsuensis           | 0    | 0    | 0    | 0    | 0    | 0    | 0    | 0    | 0    | 0    | 0    | 0    | 0    | 0    | 0    | 0    | 0    | 0    | 0    | 0    | 0    | 0    |
| Moryella                                   | 0    | 0    | 0    | 0    | 0    | 0    | 0    | 0    | 0    | 0    | 0    | 0    | 0    | 0    | 0    | 0    | 0    | 0    | 0    | 0    | 0    | 0    |
| Atopobium parvulum                         | 0    | 0    | 0    | 0    | 0    | 0    | 0    | 0    | 0    | 0    | 0    | 0    | 0    | 0    | 0    | 0    | 0    | 0    | 0    | 0    | 0    | 0    |
| Serratia marcescens                        | 0    | 0    | 0    | 0    | 0    | 0    | 0    | 0    | 0    | 0    | 0    | 0    | 0    | 0    | 0    | 0    | 0    | 0    | 0    | 0    | 0    | 0    |
| Collinsella aerofaciens                    | 0    | 0    | 0    | 0    | 0    | 0    | 0    | 0    | 0    | 0    | 0    | 0    | 0    | 0    | 0    | 0    | 0    | 0    | 0    | 0    | 0    | 0    |
| Curvibacter                                | 0    | 0    | 0    | 0    | 0    | 0    | 0    | 0    | 0    | 0    | 0    | 0    | 0    | 0    | 0    | 0    | 0    | 0    | 0    | 0    | 0    | 0    |
| Rothia dentocariosa                        | 0    | 0    | 0    | 0    | 0    | 0    | 0    | 0    | 0    | 0    | 0    | 0    | 0    | 0    | 0    | 0    | 0    | 0    | 0    | 0    | 0    | 0    |
| Prevotella bergensis                       | 0    | 168  | 0    | 0    | 64   | 0    | 0    | 0    | 0    | 0    | 0    | 0    | 0    | 0    | 0    | 0    | 0    | 0    | 0    | 140  | 0    | 0    |
| Corynebacterium sundsvallense              | 0    | 0    | 0    | 0    | 0    | 0    | 0    | 0    | 0    | 0    | 0    | 0    | 0    | 0    | 0    | 0    | 0    | 0    | 0    | 0    | 0    | 0    |

Samples S143 - S171

| Species                                       | S143 | S144 | S145 | S146 | S147 | S148 | S151 | S153 | S154 | S155 | S156 | S157 | S158 | S160 | S162 | S163 | S165 | S166 | S167 | S168 | S169 | S171 |
|-----------------------------------------------|------|------|------|------|------|------|------|------|------|------|------|------|------|------|------|------|------|------|------|------|------|------|
| Coriobacteria                                 | 0    | 89   | 0    | 0    | 0    | 0    | 0    | 0    | 0    | 0    | 0    | 0    | 0    | 0    | 0    | 0    | 0    | 0    | 0    | 0    | 0    | 0    |
| Neisseria meningitidis                        | 0    | 0    | 0    | 0    | 0    | 0    | 0    | 0    | 0    | 0    | 0    | 0    | 0    | 0    | 0    | 0    | 0    | 0    | 0    | 0    | 0    | 0    |
| Dermacoccus nishinomiyaensis                  | 0    | 0    | 0    | 0    | 0    | 0    | 0    | 0    | 0    | 0    | 0    | 0    | 0    | 0    | 0    | 0    | 0    | 0    | 0    | 0    | 0    | 0    |
| Leptotrichia                                  | 0    | 0    | 0    | 0    | 0    | 0    | 0    | 0    | 0    | 0    | 0    | 0    | 0    | 0    | 0    | 0    | 0    | 0    | 0    | 0    | 0    | 0    |
| Microbacteriaceae                             | 0    | 0    | 0    | 0    | 0    | 0    | 0    | 0    | 0    | 0    | 0    | 0    | 0    | 0    | 0    | 0    | 0    | 0    | 0    | 0    | 0    | 0    |
| Klebsiella pneumoniae/variiicola              | 0    | 0    | 0    | 0    | 0    | 0    | 0    | 0    | 0    | 0    | 0    | 0    | 0    | 0    | 0    | 0    | 0    | 0    | 0    | 0    | 0    | 0    |
| Hafnia alvei                                  | 0    | 0    | 0    | 0    | 0    | 0    | 0    | 0    | 0    | 0    | 0    | 892  | 0    | 0    | 0    | 0    | 0    | 0    | 0    | 0    | 0    | 0    |
| Caulobacter                                   | 0    | 0    | 0    | 0    | 0    | 0    | 0    | 0    | 0    | 0    | 0    | 0    | 0    | 0    | 0    | 0    | 0    | 0    | 0    | 0    | 0    | 0    |
| Lactobacillus reuteri                         | 0    | 0    | 0    | 0    | 0    | 0    | 0    | 0    | 0    | 0    | 0    | 0    | 0    | 0    | 0    | 0    | 0    | 0    | 0    | 0    | 0    | 0    |
| Gemella morbillorum                           | 0    | 0    | 0    | 0    | 0    | 0    | 0    | 0    | 0    | 0    | 0    | 0    | 0    | 0    | 0    | 0    | 0    | 0    | 0    | 0    | 0    | 0    |
| Rothia                                        | 0    | 0    | 0    | 0    | 0    | 0    | 0    | 0    | 0    | 0    | 0    | 0    | 0    | 0    | 0    | 0    | 0    | 0    | 0    | 0    | 0    | 0    |
| Campylobacter                                 | 0    | 0    | 0    | 0    | 0    | 0    | 0    | 0    | 0    | 0    | 0    | 0    | 0    | 0    | 0    | 0    | 0    | 0    | 0    | 33   | 0    | 0    |
| Prevotella genogroup 3                        | 0    | 0    | 0    | 0    | 0    | 0    | 40   | 0    | 0    | 0    | 0    | 0    | 0    | 0    | 0    | 0    | 334  | 0    | 0    | 0    | 0    | 0    |
| Staphylococcus warneri                        | 0    | 0    | 0    | 0    | 0    | 0    | 0    | 0    | 0    | 0    | 0    | 0    | 0    | 0    | 0    | 0    | 0    | 0    | 0    | 0    | 0    | 0    |
| Blautia wexlerae                              | 0    | 0    | 0    | 0    | 0    | 0    | 0    | 0    | 0    | 0    | 0    | 0    | 0    | 0    | 0    | 0    | 0    | 0    | 0    | 0    | 0    | 0    |
| Lachnoanaerobaculum                           | 0    | 0    | 0    | 0    | 0    | 0    | 0    | 0    | 0    | 0    | 0    | 0    | 0    | 0    | 0    | 0    | 0    | 0    | 0    | 0    | 0    | 0    |
| Anaerococcus hydrogenalis/senegalensis        | 0    | 0    | 0    | 0    | 34   | 0    | 0    | 0    | 0    | 0    | 0    | 0    | 0    | 0    | 0    | 0    | 0    | 0    | 0    | 0    | 0    | 0    |
| Brevibacterium mcbrellneri                    | 0    | 0    | 0    | 0    | 0    | 0    | 0    | 0    | 0    | 0    | 0    | 0    | 0    | 0    | 0    | 0    | 0    | 0    | 0    | 0    | 0    | 0    |
| Corynebacterium glaucum                       | 0    | 0    | 0    | 0    | 0    | 0    | 0    | 0    | 0    | 0    | 0    | 0    | 0    | 0    | 0    | 0    | 0    | 0    | 0    | 0    | 0    | 0    |
| Prevotella salivae                            | 0    | 0    | 0    | 0    | 0    | 0    | 0    | 0    | 0    | 0    | 0    | 0    | 0    | 0    | 0    | 0    | 0    | 0    | 0    | 0    | 0    | 0    |
| Coriobacteriaceae                             | 0    | 0    | 0    | 0    | 84   | 0    | 0    | 0    | 0    | 0    | 0    | 0    | 0    | 0    | 0    | 0    | 0    | 0    | 0    | 0    | 0    | 0    |
| Bulleidia                                     | 0    | 0    | 0    | 0    | 0    | 0    | 0    | 0    | 0    | 0    | 0    | 0    | 0    | 0    | 0    | 0    | 51   | 0    | 0    | 0    | 0    | 0    |
| Peptococcus                                   | 0    | 0    | 0    | 0    | 0    | 0    | 0    | 0    | 0    | 0    | 0    | 0    | 0    | 0    | 0    | 0    | 0    | 0    | 0    | 53   | 0    | 0    |
| Serratia marcescens/nematodiphila             | 0    | 0    | 0    | 0    | 0    | 0    | 0    | 0    | 0    | 0    | 0    | 0    | 0    | 0    | 0    | 0    | 0    | 0    | 0    | 0    | 0    | 0    |
| Leptotrichia wadei                            | 0    | 0    | 0    | 0    | 0    | 0    | 0    | 0    | 0    | 0    | 0    | 0    | 0    | 0    | 0    | 0    | 0    | 0    | 0    | 0    | 0    | 0    |
| Neisseriaceae                                 | 0    | 0    | 0    | 0    | 0    | 0    | 0    | 0    | 0    | 0    | 0    | 0    | 0    | 0    | 0    | 0    | 0    | 0    | 0    | 0    | 0    | 0    |
| Aerococcus sanguinicola                       | 0    | 0    | 0    | 0    | 0    | 0    | 0    | 0    | 0    | 0    | 0    | 0    | 0    | 0    | 0    | 0    | 0    | 0    | 0    | 0    | 0    | 0    |
| Criobacterium bergeronii                      | 0    | 0    | 0    | 0    | 0    | 0    | 0    | 0    | 0    | 0    | 0    | 0    | 0    | 0    | 0    | 0    | 0    | 0    | 0    | 0    | 0    | 0    |
| Brevibacterium luteolum                       | 0    | 0    | 0    | 0    | 0    | 0    | 0    | 0    | 0    | 0    | 0    | 0    | 0    | 0    | 0    | 0    | 0    | 0    | 0    | 0    | 0    | 0    |
| Klebsiella pneumoniae                         | 0    | 0    | 0    | 0    | 0    | 0    | 0    | 0    | 0    | 0    | 0    | 0    | 0    | 0    | 0    | 0    | 0    | 0    | 0    | 0    | 0    | 0    |
| Actinomyces oris/viscosus                     | 0    | 0    | 0    | 0    | 0    | 0    | 0    | 0    | 0    | 0    | 0    | 0    | 0    | 0    | 0    | 0    | 0    | 0    | 0    | 0    | 0    | 0    |
| Mycobacterium chelonae complex                | 0    | 0    | 0    | 0    | 0    | 0    | 0    | 0    | 0    | 0    | 0    | 0    | 0    | 0    | 0    | 0    | 0    | 0    | 0    | 0    | 0    | 0    |
| Corynebacterium jeddahense                    | 0    | 0    | 0    | 0    | 0    | 0    | 0    | 0    | 0    | 0    | 0    | 0    | 0    | 0    | 0    | 0    | 0    | 0    | 0    | 0    | 0    | 0    |
| Peptostreptococcus stomatis                   | 0    | 0    | 0    | 0    | 0    | 0    | 0    | 0    | 0    | 0    | 0    | 0    | 0    | 0    | 0    | 0    | 0    | 0    | 0    | 0    | 0    | 0    |
| Megasphaera                                   | 0    | 0    | 0    | 0    | 0    | 0    | 0    | 0    | 0    | 0    | 0    | 0    | 0    | 0    | 0    | 0    | 0    | 0    | 0    | 0    | 0    | 0    |
| Campylobacter rectus/showae                   | 0    | 0    | 0    | 0    | 0    | 0    | 0    | 0    | 0    | 0    | 0    | 0    | 0    | 0    | 0    | 0    | 0    | 0    | 0    | 0    | 0    | 0    |
| Staphylococcus carnosus/condimenti            | 0    | 0    | 0    | 0    | 0    | 0    | 0    | 0    | 0    | 0    | 0    | 0    | 0    | 0    | 0    | 0    | 0    | 0    | 0    | 0    | 0    | 0    |
| Prevotella pallens                            | 0    | 0    | 0    | 0    | 0    | 0    | 0    | 0    | 0    | 0    | 0    | 0    | 0    | 0    | 0    | 0    | 0    | 0    | 0    | 0    | 0    | 0    |
| Prolinoborus fasciculus/Acinetobacter lwoffii | 0    | 0    | 0    | 0    | 0    | 0    | 0    | 0    | 0    | 0    | 0    | 0    | 0    | 0    | 0    | 0    | 0    | 0    | 0    | 0    | 0    | 0    |
| Staphylococcus nepalensis                     | 0    | 0    | 0    | 0    | 0    | 0    | 0    | 0    | 0    | 0    | 0    | 0    | 0    | 0    | 0    | 0    | 0    | 0    | 0    | 0    | 0    | 0    |
| Staphylococcaceae                             | 0    | 0    | 0    | 0    | 0    | 0    | 0    | 0    | 0    | 0    | 0    | 0    | 0    | 0    | 0    | 0    | 0    | 0    | 0    | 0    | 0    | 0    |
| Cruoricaptor                                  | 0    | 0    | 0    | 0    | 0    | 0    | 0    | 0    | 0    | 0    | 0    | 0    | 0    | 0    | 0    | 0    | 0    | 0    | 0    | 0    | 0    | 0    |
| [Eubacterium] hallii                          | 0    | 0    | 0    | 0    | 0    | 0    | 0    | 0    | 0    | 0    | 0    | 0    | 0    | 0    | 0    | 0    | 0    | 0    | 0    | 0    | 0    | 0    |
| BVAB1 (species)                               | 0    | 0    | 0    | 0    | 0    | 0    | 0    | 0    | 0    | 0    | 0    | 0    | 0    | 0    | 0    | 0    | 0    | 0    | 0    | 0    | 0    | 0    |
| Stomatobaculum                                | 0    | 0    | 0    | 0    | 0    | 0    | 0    | 0    | 0    | 0    | 0    | 0    | 0    | 0    | 0    | 0    | 0    | 0    | 0    | 0    | 0    | 0    |
| Mycoplasma                                    | 0    | 0    | 0    | 0    | 0    | 0    | 0    | 0    | 0    | 0    | 0    | 0    | 0    | 0    | 0    | 0    | 0    | 0    | 0    | 0    | 0    | 0    |
| Catenibacterium mitsuokai                     | 0    | 0    | 0    | 0    | 0    | 0    | 0    | 0    | 0    | 0    | 0    | 0    | 0    | 0    | 0    | 0    | 0    | 0    | 0    | 0    | 0    | 0    |
| Veillonella parvula                           | 0    | 0    | 0    | 0    | 0    | 0    | 0    | 0    | 0    | 0    | 0    | 0    | 0    | 0    | 0    | 0    | 0    | 0    | 0    | 0    | 0    | 0    |
| Corynebacterium kroppenstedtii                | 0    | 0    | 0    | 0    | 0    | 0    | 0    | 0    | 0    | 0    | 0    | 0    | 0    | 0    | 0    | 0    | 0    | 0    | 0    | 0    | 0    | 0    |
| Eremococcus coleocola                         | 0    | 0    | 0    | 0    | 0    | 0    | 0    | 0    | 0    | 0    | 0    | 0    | 0    | 0    | 0    | 0    | 0    | 0    | 0    | 0    | 0    | 0    |
| Actinomyces europaeus                         | 0    | 0    | 0    | 0    | 41   | 0    | 0    | 0    | 0    | 0    | 0    | 0    | 0    | 0    | 0    | 0    | 0    | 0    | 0    | 0    | 0    | 0    |
| Peptoniphilus senegalensis                    | 0    | 0    | 0    | 0    | 0    | 0    | 0    | 0    | 0    | 0    | 0    | 0    | 0    | 0    | 0    | 0    | 0    | 0    | 0    | 0    | 0    | 0    |
| Corynebacterium afermentans/humii             | 0    | 0    | 0    | 0    | 0    | 0    | 0    | 0    | 0    | 0    | 0    | 0    | 0    | 0    | 0    | 0    | 0    | 0    | 0    | 0    | 0    | 0    |
| Acinetobacter                                 | 0    | 0    | 0    | 0    | 0    | 0    | 0    | 0    | 0    | 0    | 0    | 0    | 0    | 0    | 0    | 0    | 0    | 0    | 0    | 0    | 0    | 0    |
| Eggerthellaceae                               | 0    | 0    | 0    | 0    | 0    | 0    | 0    | 0    | 0    | 0    | 0    | 0    | 0    | 0    | 0    | 0    | 0    | 0    | 0    | 0    | 0    | 0    |
| Corynebacterium mucifaciens                   | 0    | 0    | 0    | 0    | 0    | 0    | 0    | 0    | 0    | 0    | 0    | 0    | 0    | 0    | 0    | 0    | 0    | 0    | 0    | 0    | 0    | 0    |
| Filifactor                                    | 0    | 0    | 0    | 0    | 0    | 0    | 0    | 0    | 0    | 0    | 0    | 0    | 0    | 0    | 0    | 0    | 0    | 0    | 0    | 0    | 0    | 0    |
| Ruminococcus faecis                           | 0    | 0    | 0    | 0    | 0    | 0    | 0    | 0    | 0    | 0    | 0    | 0    | 0    | 0    | 0    | 0    | 0    | 0    | 0    | 0    | 0    | 0    |
| Lactobacillus                                 | 0    | 0    | 0    | 0    | 0    | 0    | 0    | 0    | 0    | 0    | 0    | 0    | 0    | 0    | 0    | 0    | 0    | 0    | 0    | 0    | 0    | 0    |
| Peptoniphilus grossensis/rhinitidis           | 0    | 0    | 0    | 0    | 0    | 0    | 0    | 0    | 0    | 0    | 0    | 0    | 0    | 0    | 0    | 0    | 0    | 0    | 0    | 0    | 0    | 0    |
| Aerococcus urinaequi/viridans                 | 0    | 0    | 0    | 0    | 0    | 0    | 0    | 0    | 0    | 0    | 0    | 0    | 0    | 0    | 0    | 0    | 0    | 0    | 0    | 0    | 0    | 0    |
| Anaerostipes hadrus                           | 0    | 0    | 0    | 0    | 0    | 0    | 0    | 0    | 0    | 0    | 0    | 0    | 0    | 0    | 0    | 0    | 0    | 0    | 0    | 0    | 0    | 0    |
| Lagierella                                    | 0    | 0    | 0    | 0    | 38   | 0    | 0    | 0    | 0    | 0    | 0    | 0    | 0    | 0    | 0    | 0    | 0    | 0    | 0    | 0    | 0    | 0    |
| Neisseria cinerea/meningitidis                | 0    | 0    | 0    | 0    | 0    | 0    | 0    | 0    | 0    | 0    | 0    | 0    | 0    | 0    | 0    | 0    | 0    | 0    | 0    | 0    | 0    | 0    |
| Micrococcus lylae                             | 0    | 0    | 0    | 0    | 0    | 0    | 0    | 0    | 0    | 0    | 0    | 0    | 0    | 0    | 0    | 0    | 0    | 0    | 0    | 0    | 0    | 0    |
| Staphylococcus cohnii                         | 0    | 0    | 0    | 0    | 0    | 0    | 0    | 0    | 0    | 0    | 0    | 0    | 0    | 0    | 0    | 0    | 0    | 0    | 0    | 0    | 0    | 0    |
| Casaltella massiliensis                       | 0    | 0    | 0    | 0    | 0    | 0    | 0    | 0    | 0    | 0    | 0    | 0    | 0    | 0    | 0    | 0    | 0    | 0    | 0    | 0    | 0    | 0    |
| Stomatobaculum longum                         | 0    | 0    | 0    | 0    | 0    | 0    | 0    | 0    | 0    | 0    | 0    | 0    | 0    | 0    | 0    | 0    | 0    | 0    | 0    | 0    | 0    | 0    |
| Lautropia                                     | 0    | 0    | 0    | 0    | 0    | 0    | 0    | 0    | 0    | 0    | 0    | 0    | 0    | 0    | 0    | 0    | 0    | 0    | 0    | 0    | 0    | 0    |
| Fastidiosipila                                | 0    | 0    | 0    | 0    | 0    | 0    | 0    | 0    | 0    | 0    | 0    | 0    | 0    | 0    | 0    | 0    | 0    | 0    | 0    | 0    | 0    | 0    |

Samples S143 - S171

| Species                                      | S143 | S144 | S145 | S146 | S147 | S148 | S151 | S153 | S154 | S155 | S156 | S157 | S158 | S160 | S162 | S163 | S165 | S166 | S167 | S168 | S169 | S171 |
|----------------------------------------------|------|------|------|------|------|------|------|------|------|------|------|------|------|------|------|------|------|------|------|------|------|------|
| Corynebacterium durum                        | 0    | 0    | 0    | 0    | 0    | 0    | 0    | 0    | 0    | 0    | 0    | 0    | 0    | 0    | 0    | 0    | 0    | 0    | 0    | 0    | 0    | 0    |
| Actinomyces graevenitzi                      | 0    | 0    | 0    | 0    | 0    | 0    | 0    | 0    | 0    | 0    | 0    | 0    | 0    | 0    | 0    | 0    | 0    | 0    | 0    | 0    | 0    | 0    |
| Staphylococcus cohnii/saprophyticus          | 0    | 0    | 0    | 0    | 0    | 0    | 0    | 0    | 0    | 0    | 0    | 0    | 0    | 0    | 0    | 0    | 0    | 0    | 0    | 0    | 0    | 0    |
| Leptotrichia trevisanii                      | 0    | 0    | 0    | 0    | 0    | 0    | 0    | 0    | 0    | 0    | 0    | 0    | 0    | 0    | 0    | 0    | 0    | 0    | 0    | 0    | 0    | 0    |
| Candidatus Paraburkholderia calva            | 0    | 0    | 0    | 0    | 0    | 0    | 0    | 0    | 0    | 0    | 0    | 0    | 0    | 0    | 0    | 0    | 0    | 0    | 0    | 0    | 0    | 0    |
| Actinomyces urogenitalis                     | 0    | 0    | 0    | 0    | 0    | 0    | 0    | 0    | 0    | 0    | 0    | 0    | 0    | 0    | 0    | 0    | 0    | 0    | 0    | 0    | 0    | 0    |
| Clostridiales                                | 0    | 0    | 0    | 0    | 0    | 0    | 0    | 0    | 0    | 0    | 0    | 0    | 0    | 0    | 0    | 0    | 0    | 0    | 0    | 0    | 0    | 0    |
| Pasteurella caballi                          | 0    | 0    | 0    | 0    | 0    | 0    | 0    | 0    | 0    | 0    | 0    | 0    | 0    | 0    | 0    | 0    | 0    | 0    | 0    | 0    | 0    | 0    |
| Fusobacterium hwasookii/nucleatum            | 0    | 0    | 0    | 0    | 0    | 0    | 0    | 0    | 0    | 0    | 0    | 0    | 0    | 0    | 0    | 0    | 0    | 0    | 0    | 0    | 0    | 0    |
| Corynebacterium riegelii                     | 0    | 0    | 0    | 0    | 0    | 0    | 0    | 0    | 0    | 0    | 0    | 0    | 0    | 0    | 0    | 0    | 0    | 0    | 0    | 0    | 0    | 0    |
| Hafnia                                       | 0    | 0    | 0    | 0    | 0    | 0    | 0    | 0    | 0    | 0    | 0    | 126  | 0    | 0    | 0    | 0    | 0    | 0    | 0    | 0    | 0    | 0    |
| Staphylococcus equorum/saprophyticus/xylosus | 0    | 0    | 0    | 0    | 0    | 0    | 0    | 0    | 0    | 0    | 0    | 0    | 0    | 0    | 0    | 0    | 0    | 0    | 0    | 0    | 0    | 0    |
| Acinetobacter lwoffii                        | 0    | 0    | 0    | 0    | 0    | 0    | 0    | 0    | 0    | 0    | 0    | 0    | 0    | 0    | 0    | 0    | 0    | 0    | 0    | 0    | 0    | 0    |
| Micrococcus cohnii                           | 0    | 0    | 0    | 0    | 0    | 0    | 0    | 0    | 0    | 0    | 0    | 0    | 0    | 0    | 0    | 0    | 0    | 0    | 0    | 0    | 0    | 0    |
| Pseudoclavibacter faecalis                   | 0    | 0    | 0    | 0    | 0    | 0    | 0    | 0    | 0    | 0    | 0    | 0    | 0    | 0    | 0    | 0    | 0    | 0    | 0    | 0    | 0    | 0    |
| Leptotrichia buccalis                        | 0    | 0    | 0    | 0    | 0    | 0    | 0    | 0    | 0    | 0    | 0    | 0    | 0    | 0    | 0    | 0    | 0    | 0    | 0    | 0    | 0    | 0    |
| Actinomyces                                  | 0    | 0    | 0    | 0    | 0    | 0    | 0    | 0    | 0    | 0    | 0    | 0    | 0    | 0    | 0    | 0    | 0    | 0    | 0    | 0    | 0    | 0    |
| Fusobacterium nucleatum/periodonticum        | 0    | 0    | 0    | 0    | 0    | 0    | 0    | 0    | 0    | 0    | 0    | 0    | 0    | 0    | 0    | 0    | 0    | 0    | 0    | 0    | 0    | 0    |
| Lactobacillus saerimneri                     | 0    | 0    | 0    | 0    | 0    | 0    | 0    | 0    | 0    | 0    | 0    | 0    | 0    | 0    | 0    | 0    | 0    | 0    | 0    | 0    | 0    | 0    |
| Actinomycetaceae                             | 0    | 0    | 0    | 0    | 0    | 0    | 0    | 0    | 0    | 0    | 0    | 0    | 0    | 0    | 0    | 0    | 0    | 0    | 0    | 0    | 0    | 0    |
| Dialister                                    | 0    | 0    | 0    | 0    | 0    | 0    | 0    | 0    | 0    | 0    | 0    | 0    | 0    | 0    | 0    | 0    | 0    | 0    | 0    | 0    | 0    | 0    |
| Neisseria mucosa/subflava                    | 0    | 0    | 0    | 0    | 0    | 0    | 0    | 0    | 0    | 0    | 0    | 0    | 0    | 0    | 0    | 0    | 0    | 0    | 0    | 0    | 0    | 0    |
| Paracoccus                                   | 0    | 0    | 0    | 0    | 0    | 0    | 0    | 0    | 0    | 0    | 0    | 0    | 0    | 0    | 0    | 0    | 0    | 0    | 0    | 0    | 0    | 0    |
| Acinetobacter haemolyticus/johnsonii         | 0    | 0    | 0    | 0    | 0    | 0    | 0    | 0    | 0    | 0    | 0    | 0    | 0    | 0    | 0    | 0    | 0    | 0    | 0    | 0    | 0    | 0    |
| Neisseria subflava                           | 0    | 0    | 0    | 0    | 0    | 0    | 0    | 0    | 0    | 0    | 0    | 0    | 0    | 0    | 0    | 0    | 0    | 0    | 0    | 0    | 0    | 0    |
| Acinetobacter proteolyticus                  | 0    | 0    | 0    | 0    | 0    | 0    | 0    | 0    | 0    | 0    | 0    | 0    | 0    | 0    | 0    | 0    | 0    | 0    | 0    | 0    | 0    | 0    |
| Dorea formicigenerans                        | 0    | 0    | 0    | 0    | 0    | 0    | 0    | 0    | 0    | 0    | 0    | 0    | 0    | 0    | 0    | 0    | 0    | 0    | 0    | 0    | 0    | 0    |
| Corynebacterium tuscaniense                  | 0    | 0    | 0    | 0    | 0    | 0    | 0    | 0    | 0    | 0    | 0    | 0    | 0    | 0    | 0    | 0    | 0    | 0    | 0    | 0    | 0    | 0    |
| Massiliomicrobiota timonensis                | 0    | 0    | 0    | 0    | 0    | 0    | 0    | 0    | 0    | 0    | 0    | 0    | 0    | 0    | 0    | 0    | 0    | 0    | 0    | 0    | 0    | 0    |
| Fusobacterium hwasookii                      | 0    | 0    | 0    | 0    | 0    | 0    | 0    | 0    | 0    | 0    | 0    | 0    | 0    | 0    | 0    | 0    | 0    | 0    | 0    | 0    | 0    | 43   |
| Pseudoglutamicibacter albus                  | 0    | 0    | 0    | 0    | 0    | 0    | 0    | 0    | 0    | 0    | 0    | 0    | 0    | 0    | 0    | 0    | 0    | 0    | 0    | 0    | 0    | 0    |
| Clostridiales Family XIII. Incertae Sedis    | 0    | 0    | 0    | 0    | 0    | 0    | 0    | 0    | 0    | 0    | 0    | 0    | 0    | 0    | 0    | 0    | 0    | 0    | 0    | 0    | 0    | 0    |
| Kocuria marina/rhizophila                    | 0    | 0    | 0    | 0    | 0    | 0    | 0    | 0    | 0    | 0    | 0    | 0    | 0    | 0    | 0    | 0    | 0    | 0    | 52   | 0    | 0    | 0    |
| Kocuria                                      | 0    | 0    | 0    | 0    | 0    | 0    | 0    | 0    | 0    | 0    | 0    | 0    | 0    | 0    | 0    | 0    | 0    | 0    | 0    | 0    | 0    | 0    |
| Alloprevotella rava                          | 0    | 0    | 0    | 0    | 0    | 0    | 0    | 0    | 0    | 0    | 0    | 0    | 0    | 0    | 0    | 0    | 0    | 0    | 0    | 0    | 0    | 0    |
| Staphylococcus pettenkoferi                  | 0    | 0    | 0    | 0    | 0    | 0    | 0    | 0    | 0    | 0    | 0    | 0    | 0    | 0    | 0    | 0    | 0    | 0    | 0    | 0    | 0    | 0    |
| Streptococcus pseudoporcinus                 | 0    | 0    | 0    | 0    | 0    | 0    | 0    | 0    | 0    | 0    | 0    | 0    | 0    | 0    | 0    | 0    | 0    | 0    | 0    | 0    | 0    | 0    |
| Kingella                                     | 0    | 0    | 0    | 0    | 0    | 0    | 0    | 0    | 0    | 0    | 0    | 0    | 0    | 0    | 0    | 0    | 0    | 0    | 0    | 0    | 0    | 0    |
| Eikenella                                    | 0    | 0    | 0    | 0    | 0    | 0    | 0    | 0    | 0    | 0    | 0    | 0    | 0    | 0    | 0    | 0    | 0    | 0    | 0    | 0    | 0    | 0    |
| Actinomyces odontolyticus                    | 0    | 0    | 0    | 0    | 0    | 0    | 0    | 0    | 0    | 0    | 0    | 0    | 0    | 0    | 0    | 0    | 0    | 0    | 0    | 0    | 0    | 0    |
| Corynebacterium sphenisci                    | 0    | 0    | 0    | 0    | 0    | 0    | 0    | 0    | 0    | 0    | 0    | 0    | 0    | 0    | 0    | 0    | 0    | 0    | 0    | 0    | 0    | 0    |
| Cutibacterium                                | 0    | 0    | 0    | 0    | 0    | 0    | 0    | 0    | 0    | 0    | 0    | 0    | 0    | 0    | 0    | 0    | 0    | 0    | 0    | 0    | 0    | 0    |
| Staphylococcus xylosus                       | 0    | 0    | 0    | 0    | 0    | 0    | 0    | 0    | 0    | 0    | 0    | 0    | 0    | 0    | 0    | 0    | 0    | 0    | 0    | 0    | 0    | 0    |
| Burkholderiales                              | 0    | 0    | 0    | 0    | 0    | 0    | 0    | 0    | 0    | 0    | 0    | 0    | 0    | 0    | 0    | 0    | 0    | 0    | 0    | 0    | 0    | 0    |
| Massiliomicrobiota/Mycoplasma                | 0    | 0    | 0    | 0    | 0    | 0    | 0    | 0    | 0    | 0    | 0    | 0    | 0    | 0    | 0    | 0    | 0    | 0    | 0    | 0    | 0    | 0    |
| Bacteroidales                                | 0    | 0    | 0    | 0    | 0    | 0    | 0    | 0    | 0    | 0    | 0    | 0    | 0    | 0    | 0    | 0    | 0    | 0    | 0    | 0    | 0    | 0    |
| Campylobacter fetus                          | 0    | 0    | 0    | 0    | 0    | 0    | 0    | 0    | 0    | 0    | 0    | 0    | 0    | 0    | 0    | 0    | 0    | 0    | 0    | 0    | 0    | 0    |
| Prevotella aurantiaca                        | 0    | 0    | 0    | 0    | 0    | 0    | 0    | 0    | 0    | 0    | 0    | 0    | 0    | 0    | 0    | 0    | 0    | 0    | 0    | 0    | 0    | 0    |
| Corynebacterium freneyi/xerosis              | 0    | 0    | 0    | 0    | 0    | 0    | 0    | 0    | 0    | 0    | 0    | 0    | 0    | 0    | 0    | 0    | 0    | 0    | 27   | 0    | 0    | 0    |
| Aerococcaceae                                | 0    | 0    | 0    | 0    | 0    | 0    | 0    | 0    | 0    | 0    | 0    | 0    | 0    | 0    | 0    | 0    | 0    | 0    | 0    | 0    | 0    | 0    |
| Moraxella lacunata                           | 0    | 0    | 0    | 0    | 0    | 0    | 0    | 0    | 0    | 0    | 0    | 0    | 0    | 0    | 0    | 0    | 0    | 0    | 0    | 0    | 0    | 0    |
| Corynebacterium accolens/macginleyi          | 0    | 0    | 0    | 0    | 0    | 0    | 0    | 0    | 0    | 0    | 0    | 0    | 0    | 0    | 0    | 0    | 0    | 0    | 0    | 0    | 0    | 0    |
| Massilia aurea                               | 0    | 0    | 0    | 0    | 0    | 0    | 0    | 0    | 0    | 0    | 0    | 0    | 0    | 0    | 0    | 0    | 0    | 0    | 0    | 0    | 0    | 0    |
| Corynebacterium casei                        | 0    | 0    | 0    | 0    | 0    | 0    | 0    | 0    | 0    | 0    | 0    | 0    | 0    | 0    | 0    | 0    | 0    | 0    | 0    | 0    | 0    | 0    |
| Helcococcus sueciensis                       | 0    | 0    | 0    | 0    | 0    | 0    | 0    | 0    | 0    | 0    | 0    | 0    | 0    | 0    | 0    | 0    | 0    | 0    | 0    | 0    | 0    | 0    |
| Lactobacillus casei/rhannosus                | 0    | 0    | 0    | 0    | 0    | 0    | 0    | 0    | 0    | 0    | 0    | 0    | 0    | 0    | 0    | 0    | 0    | 0    | 0    | 0    | 0    | 0    |
| Holdemanella biformis                        | 0    | 0    | 0    | 0    | 0    | 0    | 0    | 0    | 0    | 0    | 0    | 0    | 0    | 0    | 0    | 0    | 0    | 0    | 0    | 0    | 0    | 0    |
| Pelistega                                    | 0    | 0    | 0    | 0    | 0    | 0    | 0    | 0    | 0    | 0    | 0    | 0    | 0    | 0    | 0    | 0    | 0    | 0    | 0    | 0    | 0    | 0    |
| Actinomyces massiliensis                     | 0    | 0    | 0    | 0    | 0    | 0    | 0    | 0    | 0    | 0    | 0    | 0    | 0    | 0    | 0    | 0    | 0    | 0    | 0    | 0    | 0    | 0    |
| Massilia                                     | 0    | 0    | 0    | 0    | 0    | 0    | 0    | 0    | 0    | 0    | 0    | 0    | 0    | 0    | 0    | 0    | 0    | 0    | 0    | 0    | 0    | 0    |
| Staphylococcus equorum/xylosus               | 0    | 0    | 0    | 0    | 0    | 0    | 0    | 0    | 0    | 0    | 0    | 0    | 0    | 0    | 0    | 0    | 0    | 0    | 0    | 0    | 0    | 0    |
| Streptococcus                                | 0    | 0    | 0    | 0    | 0    | 0    | 0    | 0    | 0    | 0    | 0    | 0    | 0    | 0    | 0    | 0    | 0    | 0    | 0    | 0    | 0    | 0    |
| Cutibacterium avidum                         | 0    | 0    | 0    | 0    | 0    | 0    | 0    | 0    | 0    | 0    | 0    | 0    | 0    | 0    | 0    | 0    | 0    | 0    | 0    | 0    | 0    | 0    |

**Samples S172 - S199**

| Species                                             | S172  | S175 | S176  | S177  | S178  | S179   | S180  | S181   | S183 | S184  | S185  | S186  | S187 | S190  | S191 | S192 | S193 | S194  | S196  | S197  | S198  | S199  |
|-----------------------------------------------------|-------|------|-------|-------|-------|--------|-------|--------|------|-------|-------|-------|------|-------|------|------|------|-------|-------|-------|-------|-------|
| Streptococcus mitis group                           | 25185 | 284  | 28642 | 24934 | 2461  | 105740 | 20597 | 24407  | 5622 | 706   | 15294 | 28    | 309  | 5085  | 0    | 114  | 1996 | 4708  | 12184 | 15652 | 39787 | 29836 |
| Lactobacillus iners                                 | 0     | 2312 | 0     | 27636 | 39012 | 0      | 461   | 102906 | 0    | 0     | 138   | 24965 | 28   | 56    | 0    | 8753 | 0    | 0     | 0     | 0     | 0     | 0     |
| Gardnerella vaginalis                               | 50    | 4405 | 2855  | 9865  | 10415 | 0      | 1018  | 9191   | 0    | 19590 | 2116  | 18207 | 0    | 0     | 178  | 8992 | 0    | 3120  | 0     | 0     | 0     | 0     |
| Corynebacterium pseudogenitalium/tuberculo-tearicum | 90    | 71   | 115   | 854   | 695   | 20739  | 3454  | 58     | 2149 | 79    | 4867  | 54    | 476  | 748   | 261  | 4261 | 739  | 36    | 157   | 293   | 131   | 683   |
| Streptococcus agalactiae                            | 0     | 0    | 0     | 0     | 2724  | 0      | 0     | 2308   | 0    | 0     | 25352 | 0     | 0    | 213   | 72   | 0    | 841  | 13249 | 0     | 0     | 0     | 18826 |
| Veillonella montpellierensis                        | 61374 | 1167 | 29280 | 0     | 30627 | 0      | 0     | 0      | 0    | 8940  | 4683  | 0     | 0    | 0     | 0    | 0    | 0    | 0     | 0     | 0     | 0     | 24371 |
| Streptococcus anginosus                             | 4378  | 167  | 212   | 0     | 0     | 0      | 54    | 5066   | 0    | 894   | 0     | 25    | 0    | 15290 | 146  | 0    | 0    | 28    | 0     | 0     | 42    | 0     |
| Chlamydia trachomatis                               | 0     | 0    | 0     | 0     | 0     | 0      | 0     | 0      | 0    | 0     | 3412  | 0     | 0    | 37    | 0    | 0    | 0    | 0     | 0     | 0     | 0     | 0     |
| Haemophilus parainfluenzae                          | 208   | 0    | 0     | 0     | 47    | 0      | 0     | 690    | 0    | 0     | 71    | 0     | 0    | 0     | 0    | 0    | 2675 | 1030  | 239   | 4964  | 0     | 14589 |
| Finegoldia magna                                    | 0     | 0    | 0     | 7850  | 191   | 1352   | 204   | 433    | 0    | 266   | 550   | 0     | 0    | 48    | 889  | 56   | 0    | 819   | 355   | 601   | 3858  | 338   |
| Peptoniphilus asaccharolyticus/grossensis/harei     | 0     | 0    | 0     | 7953  | 0     | 0      | 54    | 93     | 0    | 401   | 682   | 0     | 0    | 66    | 395  | 0    | 66   | 1029  | 0     | 0     | 4444  | 2294  |
| Sneathia amnii                                      | 0     | 0    | 22772 | 25963 | 0     | 0      | 0     | 0      | 0    | 3598  | 40428 | 0     | 0    | 0     | 0    | 0    | 0    | 0     | 0     | 0     | 0     | 0     |
| Staphylococcus caprae/cohnii/epidermidis            | 0     | 146  | 0     | 0     | 59    | 14806  | 743   | 2385   | 236  | 66    | 474   | 0     | 170  | 73    | 49   | 315  | 0    | 0     | 29    | 658   | 203   | 39    |
| Gemella haemolysans/taiwanensis                     | 5796  | 58   | 0     | 0     | 484   | 0      | 3149  | 3323   | 0    | 37    | 3409  | 0     | 0    | 303   | 0    | 0    | 34   | 0     | 47    | 0     | 0     | 684   |
| Sneathia sanguinegens                               | 0     | 0    | 4159  | 27259 | 0     | 0      | 0     | 0      | 0    | 0     | 81    | 0     | 0    | 0     | 0    | 0    | 0    | 0     | 0     | 0     | 0     | 0     |
| Mycoplasma genitalium                               | 0     | 0    | 0     | 0     | 0     | 0      | 0     | 0      | 0    | 0     | 0     | 0     | 0    | 0     | 0    | 0    | 0    | 0     | 0     | 0     | 0     | 0     |
| Mycoplasma penetrans                                | 0     | 0    | 0     | 0     | 0     | 0      | 0     | 0      | 0    | 0     | 0     | 0     | 0    | 0     | 0    | 0    | 0    | 0     | 0     | 0     | 0     | 0     |
| Haemophilus haemolyticus/quentini                   | 14774 | 0    | 0     | 0     | 0     | 0      | 0     | 120    | 0    | 144   | 0     | 0     | 0    | 25    | 0    | 0    | 0    | 0     | 0     | 0     | 0     | 0     |
| Corynebacterium pyruvicoproducens                   | 2805  | 40   | 0     | 156   | 0     | 0      | 0     | 435    | 0    | 2913  | 0     | 0     | 0    | 0     | 206  | 0    | 0    | 110   | 0     | 0     | 1873  | 0     |
| Anaerococcus prevotii/tetradicus                    | 0     | 0    | 0     | 4595  | 0     | 0      | 309   | 0      | 0    | 0     | 3908  | 0     | 0    | 116   | 79   | 0    | 0    | 170   | 0     | 340   | 73    | 163   |
| Haemophilus influenzae                              | 93    | 0    | 0     | 0     | 0     | 0      | 0     | 182    | 0    | 0     | 0     | 0     | 0    | 0     | 0    | 0    | 0    | 0     | 0     | 0     | 0     | 30    |
| Staphylococcus epidermidis/hominis                  | 30    | 0    | 0     | 0     | 0     | 3459   | 2501  | 140    | 304  | 0     | 394   | 0     | 91   | 34    | 0    | 287  | 29   | 0     | 0     | 1531  | 123   | 0     |
| Atopobium vaginae                                   | 0     | 0    | 2318  | 146   | 12976 | 0      | 346   | 0      | 0    | 1325  | 0     | 0     | 0    | 0     | 0    | 0    | 211  | 0     | 90    | 0     | 0     | 0     |
| Ureaplasma parvum/urealyticum                       | 0     | 0    | 4380  | 2974  | 2286  | 0      | 0     | 963    | 202  | 400   | 1834  | 265   | 0    | 1590  | 0    | 0    | 36   | 0     | 361   | 0     | 0     | 0     |
| Prevotella timonensis                               | 0     | 0    | 0     | 4091  | 0     | 0      | 0     | 0      | 0    | 125   | 120   | 0     | 0    | 0     | 188  | 0    | 0    | 109   | 0     | 0     | 1615  | 0     |
| Fenollaria massiliensis/timonensis                  | 0     | 0    | 0     | 0     | 0     | 0      | 0     | 0      | 0    | 0     | 0     | 0     | 0    | 40    | 0    | 0    | 0    | 0     | 0     | 0     | 3256  | 0     |
| Anaerococcus                                        | 0     | 0    | 0     | 0     | 40    | 0      | 0     | 0      | 0    | 159   | 221   | 0     | 0    | 140   | 0    | 25   | 26   | 217   | 0     | 41    | 2716  | 0     |
| Corynebacterium coyleae                             | 0     | 0    | 0     | 79    | 407   | 0      | 199   | 922    | 226  | 0     | 896   | 0     | 0    | 0     | 32   | 67   | 0    | 187   | 0     | 830   | 0     | 0     |
| Prevotella bivia                                    | 0     | 0    | 0     | 0     | 0     | 0      | 27    | 0      | 0    | 0     | 0     | 0     | 0    | 0     | 551  | 0    | 0    | 48    | 184   | 0     | 0     | 0     |
| Prevotella melaninogenica                           | 260   | 0    | 8401  | 0     | 0     | 0      | 0     | 0      | 0    | 0     | 0     | 0     | 0    | 0     | 0    | 0    | 0    | 0     | 0     | 0     | 0     | 0     |
| Corynebacterium aurimucosum/minimum/singulare       | 41    | 25   | 27    | 173   | 1266  | 2532   | 0     | 0      | 1777 | 0     | 5080  | 0     | 43   | 0     | 0    | 429  | 101  | 0     | 60    | 0     | 0     | 157   |
| Staphylococcus aureus                               | 0     | 0    | 0     | 0     | 0     | 0      | 0     | 0      | 0    | 0     | 1037  | 0     | 0    | 0     | 0    | 0    | 0    | 0     | 0     | 0     | 0     | 0     |
| Anaerococcus lactolyticus                           | 0     | 0    | 0     | 6878  | 0     | 0      | 0     | 0      | 0    | 427   | 296   | 0     | 0    | 0     | 0    | 0    | 0    | 0     | 0     | 0     | 0     | 0     |
| Aerococcus christensenii                            | 0     | 0    | 1682  | 1684  | 5751  | 0      | 0     | 3037   | 0    | 1951  | 0     | 0     | 0    | 0     | 0    | 0    | 0    | 0     | 0     | 0     | 0     | 0     |
| Corynebacterium glucuronolyticum                    | 0     | 0    | 0     | 0     | 0     | 186    | 0     | 0      | 0    | 0     | 0     | 0     | 0    | 429   | 0    | 0    | 0    | 0     | 0     | 0     | 0     | 0     |
| Veillonella atypica                                 | 2228  | 0    | 0     | 0     | 0     | 0      | 0     | 0      | 0    | 0     | 0     | 0     | 0    | 39    | 0    | 0    | 502  | 0     | 3527  | 96    | 0     | 0     |
| Veillonella                                         | 175   | 0    | 0     | 0     | 0     | 0      | 31    | 0      | 0    | 0     | 0     | 0     | 0    | 0     | 0    | 0    | 0    | 0     | 0     | 0     | 0     | 0     |
| Mycoplasma hominis                                  | 0     | 0    | 3419  | 0     | 1084  | 0      | 0     | 0      | 0    | 0     | 0     | 0     | 0    | 0     | 0    | 32   | 0    | 0     | 0     | 0     | 0     | 0     |
| Granulicatella elegans                              | 736   | 0    | 0     | 0     | 0     | 0      | 48    | 0      | 0    | 0     | 112   | 0     | 0    | 0     | 0    | 0    | 0    | 0     | 0     | 0     | 0     | 0     |
| Ezakiella                                           | 0     | 0    | 0     | 1356  | 0     | 0      | 0     | 0      | 0    | 0     | 34    | 0     | 0    | 0     | 0    | 0    | 0    | 28    | 0     | 0     | 398   | 0     |
| Shigella/Escherichia                                | 0     | 0    | 0     | 0     | 0     | 0      | 0     | 0      | 0    | 0     | 0     | 0     | 0    | 0     | 0    | 0    | 0    | 0     | 0     | 0     | 0     | 0     |
| Streptococcus salivarius                            | 185   | 0    | 0     | 0     | 0     | 0      | 183   | 32     | 0    | 0     | 714   | 0     | 0    | 87    | 0    | 31   | 0    | 0     | 0     | 0     | 0     | 0     |
| Actinomyces turicensis                              | 0     | 0    | 0     | 1245  | 0     | 0      | 0     | 0      | 0    | 626   | 180   | 0     | 0    | 0     | 0    | 0    | 0    | 235   | 0     | 0     | 0     | 0     |
| Prevotella corporis                                 | 0     | 0    | 0     | 0     | 0     | 0      | 0     | 0      | 0    | 0     | 0     | 0     | 0    | 0     | 0    | 0    | 0    | 0     | 0     | 0     | 0     | 0     |
| Corynebacterium simulans                            | 0     | 0    | 0     | 0     | 0     | 82     | 0     | 0      | 0    | 0     | 0     | 0     | 0    | 389   | 109  | 0    | 0    | 0     | 0     | 0     | 0     | 0     |
| Fusobacterium equinum                               | 0     | 0    | 0     | 0     | 0     | 0      | 0     | 0      | 0    | 0     | 0     | 0     | 0    | 0     | 0    | 0    | 0    | 0     | 0     | 0     | 0     | 0     |
| Corynebacterium                                     | 0     | 0    | 0     | 0     | 0     | 0      | 111   | 0      | 552  | 0     | 159   | 0     | 0    | 0     | 0    | 135  | 196  | 0     | 0     | 0     | 31    | 11230 |
| Staphylococcus haemolyticus                         | 0     | 0    | 0     | 32    | 26    | 542    | 667   | 0      | 30   | 0     | 222   | 0     | 0    | 0     | 54   | 0    | 0    | 997   | 3420  | 0     | 0     | 0     |
| Gemella asaccharolytica                             | 0     | 0    | 1470  | 1126  | 0     | 0      | 70    | 0      | 572  | 89    | 249   | 0     | 0    | 0     | 0    | 0    | 0    | 0     | 0     | 0     | 0     | 0     |
| Peptoniphilus                                       | 0     | 0    | 0     | 2596  | 0     | 0      | 0     | 0      | 0    | 52    | 140   | 0     | 0    | 39    | 32   | 0    | 0    | 0     | 0     | 0     | 67    | 0     |
| Corynebacterium hadale/imitans                      | 0     | 0    | 0     | 0     | 237   | 0      | 178   | 0      | 698  | 0     | 1435  | 0     | 0    | 0     | 0    | 226  | 36   | 0     | 0     | 0     | 0     | 0     |
| Eggerthella sp. type 1 (species)                    | 0     | 0    | 884   | 921   | 1493  | 0      | 0     | 0      | 0    | 453   | 0     | 0     | 0    | 0     | 0    | 0    | 0    | 0     | 0     | 0     | 0     | 0     |
| Prevotella disiens                                  | 0     | 0    | 0     | 7718  | 0     | 0      | 0     | 0      | 0    | 308   | 0     | 0     | 0    | 0     | 0    | 0    | 30   | 0     | 0     | 0     | 662   | 0     |
| Peptoniphilus lacrimalis                            | 0     | 0    | 0     | 1500  | 0     | 0      | 0     | 0      | 0    | 115   | 0     | 0     | 0    | 0     | 0    | 0    | 0    | 0     | 0     | 0     | 1201  | 0     |
| Anaerococcus vaginalis                              | 0     | 0    | 0     | 552   | 0     | 0      | 0     | 0      | 0    | 203   | 106   | 0     | 0    | 0     | 0    | 0    | 0    | 0     | 0     | 0     | 318   | 40    |
| Facklamia hominis                                   | 0     | 0    | 0     | 44    | 0     | 0      | 0     | 0      | 0    | 0     | 0     | 0     | 0    | 0     | 0    | 0    | 162  | 0     | 0     | 0     | 0     | 562   |
| Prevotella amnii                                    | 0     | 0    | 279   | 0     | 7879  | 0      | 0     | 0      | 30   | 1237  | 492   | 0     | 0    | 0     | 0    | 0    | 0    | 0     | 0     | 0     | 0     | 0     |
| Campylobacter ureolyticus                           | 0     | 0    | 0     | 1132  | 0     | 0      | 0     | 0      | 0    | 107   | 67    | 0     | 0    | 0     | 0    | 0    | 0    | 157   | 0     | 0     | 214   | 0     |
| BVAB2 (species)                                     | 0     | 0    | 261   | 1736  | 0     | 0      | 0     | 0      | 0    | 362   | 0     | 0     | 0    | 0     | 0    | 0    | 0    | 0     | 0     | 0     | 0     | 0     |
| Haemophilus                                         | 106   | 0    | 0     | 0     | 0     | 0      | 0     | 199    | 0    | 0     | 0     | 0     | 0    | 0     | 0    | 0    | 0    | 0     | 0     | 0     | 0     | 0     |
| Anaerococcus hydrogenalis/rubeifantus               | 74    | 0    | 0     | 0     | 0     | 0      | 0     | 37     | 0    | 0     | 36    | 0     | 0    | 25    | 28   | 0    | 0    | 0     | 0     | 0     | 641   | 25    |
| Anaerococcus mediterraneensis                       | 0     | 0    | 0     | 655   | 0     | 0      | 0     | 0      | 0    | 0     | 247   | 0     | 0    | 0     | 65   | 0    | 0    | 0     | 0     | 0     | 0     | 0     |
| Dialister sp. type 2                                | 0     | 0    | 0     | 8234  | 0     | 0      | 0     | 0      | 0    | 399   | 0     | 0     | 0    | 0     | 0    | 0    | 0    | 0     | 0     | 0     | 0     | 0     |
| Dialister microaerophilus                           | 0     | 0    | 461   | 1344  | 0     | 0      | 0     | 29     | 0    | 206   | 0     | 0     | 0    | 0     | 32   | 0    | 0    | 35    | 0     | 0     | 0     | 0     |
| Corynebacterium amycolatum                          | 0     | 0    | 0     | 0     | 0     | 0      | 0     | 0      | 0    | 0     | 131   | 0     | 0    | 0     | 0    | 0    | 0    | 0     | 0     | 0     | 0     | 0     |
| Ureaplasma                                          | 0     | 0    | 0     | 0     | 0     | 16310  | 0     | 820    | 0    | 317   | 0     | 0     | 0    | 0     | 0    | 0    | 0    | 0     | 301   | 0     | 0     | 0     |
| Enterococcus faecalis                               | 0     | 0    | 0     | 0     | 0     | 0      | 0     | 0      | 0    | 0     | 0     | 0     | 0    | 0     | 0    | 0    | 0    | 29    | 0     | 0     | 0     | 0     |
| Parvimonas                                          | 0     | 0    | 0     | 0     | 0     | 0      | 0     | 0      | 0    | 0     | 0     | 0     | 0    | 0     | 0    | 0    | 0    | 0     | 0     | 0     | 0     | 0     |
| Haemophilus pittmaniae                              | 0     | 0    | 0     | 0     | 0     | 0      | 0     | 0      | 0    | 0     | 0     | 0     | 0    | 0     | 0    | 0    | 0    | 0     | 0     | 0     | 0     | 0     |
| Actinomyces neuii                                   | 0     | 183  | 0     | 490   | 0     | 32     | 0     | 0      | 0    | 0     | 0     | 0     | 0    | 0     | 0    | 0    | 0    | 0     | 0     | 0     | 0     | 0     |

# Samples S172 - S199

| Species                                                | S172 | S175 | S176 | S177 | S178 | S179 | S180 | S181 | S183 | S184 | S185 | S186 | S187 | S190 | S191 | S192 | S193 | S194 | S196 | S197 | S198 | S199 |   |
|--------------------------------------------------------|------|------|------|------|------|------|------|------|------|------|------|------|------|------|------|------|------|------|------|------|------|------|---|
| Peptoniphilus rhinitidis                               | 0    | 0    | 0    | 0    | 0    | 0    | 0    | 0    | 0    | 0    | 0    | 0    | 0    | 0    | 0    | 0    | 0    | 0    | 0    | 0    | 0    | 1223 | 0 |
| Anaerococcus senegalensis                              | 0    | 0    | 0    | 125  | 0    | 269  | 53   | 0    | 0    | 0    | 0    | 0    | 0    | 0    | 81   | 0    | 0    | 0    | 0    | 0    | 2328 | 66   | 0 |
| Peptostreptococcus anaerobius                          | 0    | 0    | 0    | 0    | 0    | 0    | 43   | 0    | 0    | 0    | 0    | 0    | 0    | 0    | 0    | 0    | 0    | 0    | 309  | 0    | 0    | 0    | 0 |
| Dialister propionificaciens                            | 0    | 0    | 0    | 0    | 0    | 0    | 0    | 0    | 0    | 107  | 0    | 0    | 0    | 0    | 201  | 0    | 0    | 0    | 0    | 0    | 0    | 985  | 0 |
| Peptoniphilus harei                                    | 0    | 0    | 0    | 0    | 36   | 0    | 0    | 0    | 0    | 0    | 0    | 0    | 0    | 0    | 0    | 0    | 0    | 0    | 0    | 0    | 0    | 0    | 0 |
| Negativicoccus succinivorans                           | 0    | 0    | 0    | 0    | 0    | 0    | 0    | 0    | 0    | 130  | 0    | 0    | 0    | 0    | 0    | 0    | 0    | 27   | 0    | 0    | 250  | 0    | 0 |
| Parvimonas micra                                       | 0    | 0    | 0    | 1447 | 0    | 0    | 0    | 0    | 0    | 0    | 0    | 0    | 0    | 0    | 0    | 0    | 0    | 0    | 0    | 0    | 0    | 0    | 0 |
| Actinomyces ihumii                                     | 0    | 0    | 0    | 0    | 0    | 0    | 0    | 0    | 0    | 105  | 0    | 0    | 0    | 0    | 0    | 0    | 0    | 45   | 0    | 0    | 49   | 0    | 0 |
| Actinotignum timonense                                 | 0    | 0    | 0    | 167  | 0    | 0    | 0    | 0    | 0    | 0    | 0    | 0    | 0    | 0    | 0    | 0    | 0    | 0    | 0    | 0    | 0    | 0    | 0 |
| Fenollaria                                             | 0    | 0    | 0    | 0    | 0    | 0    | 0    | 0    | 0    | 0    | 0    | 0    | 0    | 0    | 0    | 0    | 0    | 0    | 0    | 0    | 2108 | 0    | 0 |
| Fusobacterium massiliense                              | 0    | 0    | 0    | 0    | 0    | 0    | 0    | 0    | 0    | 0    | 0    | 0    | 0    | 0    | 0    | 0    | 0    | 0    | 0    | 0    | 0    | 0    | 0 |
| Actinobaculum massiliense                              | 0    | 0    | 0    | 321  | 0    | 0    | 0    | 0    | 0    | 0    | 0    | 0    | 0    | 0    | 0    | 0    | 0    | 118  | 0    | 0    | 0    | 0    | 0 |
| Peptoniphilus coxii                                    | 0    | 0    | 0    | 114  | 0    | 0    | 0    | 0    | 0    | 0    | 41   | 0    | 0    | 0    | 0    | 0    | 0    | 116  | 0    | 0    | 1730 | 0    | 0 |
| Staphylococcus lugdunensis                             | 0    | 0    | 0    | 0    | 0    | 0    | 0    | 0    | 0    | 0    | 0    | 0    | 0    | 0    | 0    | 0    | 0    | 0    | 0    | 0    | 72   | 0    | 0 |
| Dermabacter                                            | 0    | 0    | 0    | 0    | 75   | 70   | 63   | 0    | 188  | 0    | 492  | 0    | 0    | 0    | 102  | 0    | 0    | 0    | 0    | 0    | 0    | 0    | 0 |
| Alloscardovia omnicolens                               | 0    | 0    | 0    | 0    | 0    | 0    | 0    | 0    | 0    | 0    | 0    | 0    | 0    | 0    | 0    | 0    | 0    | 0    | 0    | 0    | 0    | 0    | 0 |
| Varibaculum cambriense                                 | 0    | 0    | 0    | 1027 | 0    | 0    | 0    | 0    | 0    | 0    | 0    | 0    | 0    | 0    | 30   | 0    | 0    | 184  | 0    | 0    | 328  | 0    | 0 |
| Streptococcus urinalis                                 | 0    | 0    | 0    | 0    | 0    | 254  | 0    | 0    | 0    | 198  | 0    | 0    | 0    | 620  | 0    | 0    | 0    | 0    | 0    | 0    | 0    | 0    | 0 |
| Corynebacterium appendicis                             | 0    | 0    | 0    | 0    | 0    | 0    | 0    | 0    | 365  | 0    | 123  | 0    | 0    | 0    | 0    | 0    | 0    | 0    | 0    | 0    | 0    | 0    | 0 |
| Actinotignum schaalii                                  | 0    | 0    | 0    | 780  | 0    | 0    | 0    | 0    | 0    | 0    | 0    | 0    | 0    | 0    | 0    | 0    | 0    | 227  | 0    | 0    | 0    | 0    | 0 |
| Corynebacterium timonense                              | 0    | 0    | 0    | 0    | 0    | 0    | 0    | 0    | 0    | 0    | 0    | 0    | 0    | 0    | 0    | 0    | 0    | 0    | 0    | 0    | 0    | 0    | 0 |
| Gemella                                                | 26   | 0    | 0    | 0    | 0    | 0    | 0    | 40   | 0    | 0    | 0    | 0    | 0    | 50   | 0    | 0    | 0    | 0    | 0    | 0    | 0    | 0    | 0 |
| Klebsiella aerogenes/Enterobacter asburiae             | 0    | 0    | 0    | 0    | 0    | 0    | 0    | 0    | 0    | 0    | 0    | 0    | 0    | 0    | 0    | 0    | 0    | 0    | 0    | 0    | 0    | 0    | 0 |
| Fusobacterium periodonticum                            | 56   | 0    | 0    | 0    | 0    | 0    | 0    | 0    | 0    | 0    | 0    | 0    | 0    | 0    | 0    | 0    | 0    | 0    | 0    | 0    | 0    | 0    | 0 |
| Veillonella dispar                                     | 115  | 0    | 0    | 0    | 0    | 0    | 0    | 0    | 0    | 0    | 0    | 0    | 0    | 91   | 0    | 0    | 234  | 0    | 1068 | 79   | 0    | 0    | 0 |
| Prevotella colorans                                    | 0    | 0    | 0    | 0    | 0    | 0    | 0    | 0    | 0    | 106  | 0    | 0    | 0    | 0    | 54   | 0    | 0    | 0    | 0    | 0    | 1123 | 0    | 0 |
| Candidatus Peptoniphilus massiliensis                  | 0    | 0    | 0    | 0    | 0    | 0    | 0    | 0    | 0    | 0    | 0    | 0    | 0    | 0    | 0    | 0    | 0    | 0    | 0    | 0    | 339  | 0    | 0 |
| Eremococcus                                            | 0    | 0    | 0    | 0    | 42   | 0    | 87   | 0    | 93   | 0    | 615  | 0    | 0    | 0    | 40   | 0    | 0    | 0    | 0    | 0    | 0    | 0    | 0 |
| Varibaculum anthropi                                   | 0    | 0    | 0    | 237  | 0    | 0    | 0    | 0    | 0    | 0    | 0    | 0    | 0    | 0    | 0    | 0    | 0    | 0    | 0    | 0    | 0    | 0    | 0 |
| Propionimicrobium lymphophilum                         | 0    | 0    | 0    | 131  | 0    | 0    | 0    | 0    | 0    | 0    | 0    | 0    | 0    | 0    | 0    | 0    | 0    | 0    | 0    | 0    | 0    | 0    | 0 |
| Streptococcus dysgalactiae                             | 0    | 0    | 0    | 0    | 0    | 0    | 0    | 0    | 0    | 0    | 1180 | 0    | 0    | 0    | 0    | 0    | 0    | 0    | 0    | 0    | 0    | 0    | 0 |
| Negativicoccus                                         | 0    | 0    | 0    | 0    | 0    | 0    | 0    | 0    | 0    | 116  | 0    | 0    | 0    | 0    | 0    | 0    | 0    | 0    | 0    | 0    | 700  | 0    | 0 |
| Porphyromonas somerae                                  | 0    | 0    | 0    | 0    | 0    | 0    | 0    | 0    | 0    | 0    | 0    | 0    | 0    | 0    | 0    | 0    | 0    | 45   | 0    | 0    | 0    | 0    | 0 |
| Corynebacterium jeikeium                               | 0    | 0    | 0    | 0    | 480  | 0    | 528  | 0    | 356  | 0    | 4373 | 0    | 0    | 0    | 0    | 0    | 33   | 0    | 0    | 0    | 0    | 0    | 0 |
| Mobiluncus curtisii                                    | 0    | 0    | 0    | 0    | 0    | 0    | 0    | 0    | 0    | 175  | 0    | 0    | 0    | 0    | 235  | 0    | 0    | 0    | 0    | 0    | 626  | 0    | 0 |
| Porphyromonas uenonis                                  | 0    | 0    | 0    | 426  | 0    | 0    | 0    | 0    | 0    | 0    | 0    | 0    | 0    | 0    | 0    | 0    | 0    | 0    | 0    | 0    | 57   | 0    | 0 |
| Aerococcus urinae                                      | 0    | 0    | 0    | 109  | 0    | 0    | 0    | 0    | 0    | 0    | 0    | 0    | 0    | 0    | 0    | 0    | 0    | 70   | 0    | 0    | 0    | 0    | 0 |
| Corynebacterium mycetoides                             | 0    | 0    | 0    | 0    | 0    | 0    | 0    | 0    | 0    | 0    | 0    | 0    | 0    | 0    | 0    | 0    | 0    | 0    | 0    | 0    | 0    | 0    | 0 |
| Cutibacterium acnes                                    | 0    | 0    | 0    | 0    | 0    | 87   | 0    | 0    | 0    | 0    | 0    | 0    | 0    | 0    | 0    | 0    | 0    | 0    | 0    | 0    | 51   | 0    | 0 |
| Urinacoccus massiliensis                               | 0    | 0    | 0    | 922  | 0    | 0    | 0    | 0    | 0    | 0    | 58   | 0    | 0    | 0    | 0    | 0    | 0    | 0    | 0    | 0    | 291  | 0    | 0 |
| Campylobacter hominis                                  | 0    | 0    | 0    | 0    | 0    | 0    | 0    | 0    | 0    | 0    | 0    | 0    | 0    | 0    | 0    | 0    | 0    | 0    | 0    | 0    | 0    | 0    | 0 |
| Staphylococcus capitis/caprae                          | 0    | 0    | 0    | 0    | 0    | 0    | 0    | 0    | 0    | 0    | 0    | 0    | 0    | 0    | 0    | 0    | 0    | 0    | 0    | 0    | 0    | 0    | 0 |
| Sneathia                                               | 0    | 0    | 0    | 0    | 0    | 0    | 0    | 0    | 0    | 0    | 0    | 0    | 0    | 0    | 0    | 0    | 0    | 0    | 0    | 0    | 0    | 0    | 0 |
| Prevotella jejuni                                      | 139  | 0    | 0    | 0    | 0    | 0    | 0    | 0    | 0    | 0    | 0    | 0    | 0    | 0    | 0    | 0    | 0    | 0    | 0    | 0    | 0    | 0    | 0 |
| Varibaculum                                            | 0    | 0    | 0    | 0    | 0    | 0    | 0    | 0    | 0    | 0    | 0    | 0    | 0    | 0    | 0    | 0    | 0    | 625  | 0    | 0    | 1040 | 0    | 0 |
| Corynebacterium striatum                               | 0    | 0    | 0    | 0    | 0    | 0    | 0    | 0    | 0    | 0    | 0    | 0    | 0    | 0    | 0    | 0    | 0    | 0    | 0    | 0    | 0    | 0    | 0 |
| Jonquetella anthropi                                   | 0    | 0    | 0    | 0    | 0    | 0    | 0    | 0    | 0    | 0    | 0    | 0    | 0    | 0    | 0    | 0    | 0    | 0    | 0    | 0    | 38   | 0    | 0 |
| Peptoniphilus koenoenieniae                            | 0    | 0    | 0    | 0    | 0    | 0    | 0    | 0    | 0    | 0    | 0    | 0    | 0    | 0    | 0    | 0    | 0    | 0    | 0    | 0    | 552  | 0    | 0 |
| Bifidobacterium longum                                 | 0    | 0    | 0    | 0    | 0    | 0    | 0    | 0    | 0    | 0    | 0    | 0    | 0    | 0    | 0    | 0    | 0    | 0    | 0    | 0    | 0    | 0    | 0 |
| Helicobacter                                           | 0    | 0    | 0    | 0    | 0    | 0    | 0    | 0    | 0    | 0    | 0    | 0    | 0    | 0    | 0    | 0    | 0    | 0    | 0    | 0    | 0    | 0    | 0 |
| Lawsonella clevelandensis                              | 0    | 0    | 0    | 0    | 0    | 0    | 0    | 0    | 0    | 0    | 0    | 0    | 0    | 0    | 0    | 0    | 0    | 0    | 0    | 0    | 163  | 0    | 0 |
| Escherichia coli/fergusonii                            | 0    | 0    | 0    | 0    | 0    | 0    | 0    | 0    | 0    | 0    | 0    | 0    | 0    | 0    | 0    | 0    | 0    | 0    | 0    | 0    | 0    | 0    | 0 |
| Fusobacterium nucleatum                                | 0    | 0    | 0    | 0    | 0    | 0    | 0    | 0    | 0    | 219  | 0    | 0    | 0    | 0    | 0    | 0    | 0    | 45   | 0    | 0    | 0    | 0    | 0 |
| Porphyromonas asaccharolytica                          | 0    | 0    | 0    | 0    | 0    | 0    | 0    | 0    | 0    | 0    | 0    | 0    | 0    | 0    | 0    | 0    | 0    | 0    | 0    | 0    | 0    | 0    | 0 |
| Anaerococcus octavius                                  | 0    | 0    | 0    | 0    | 28   | 0    | 95   | 0    | 0    | 0    | 77   | 0    | 0    | 0    | 0    | 0    | 0    | 0    | 0    | 0    | 0    | 0    | 0 |
| Fusobacterium                                          | 0    | 0    | 0    | 0    | 0    | 0    | 0    | 0    | 0    | 0    | 0    | 0    | 0    | 0    | 0    | 0    | 0    | 0    | 0    | 0    | 0    | 0    | 0 |
| Corynebacterium phoceense                              | 0    | 0    | 0    | 0    | 0    | 0    | 0    | 0    | 0    | 0    | 0    | 0    | 0    | 0    | 0    | 0    | 0    | 0    | 0    | 0    | 0    | 0    | 0 |
| Ruminococcus                                           | 0    | 0    | 0    | 0    | 0    | 0    | 0    | 0    | 0    | 0    | 0    | 0    | 0    | 0    | 0    | 0    | 0    | 0    | 0    | 0    | 0    | 0    | 0 |
| Arcanobacterium                                        | 0    | 0    | 29   | 223  | 0    | 0    | 0    | 0    | 0    | 0    | 0    | 0    | 0    | 0    | 0    | 0    | 0    | 0    | 0    | 0    | 0    | 0    | 0 |
| Khoudiadiopia                                          | 0    | 0    | 0    | 0    | 0    | 0    | 0    | 0    | 0    | 0    | 0    | 0    | 0    | 0    | 27   | 0    | 0    | 0    | 0    | 0    | 0    | 0    | 0 |
| Atopobium deltae                                       | 0    | 0    | 0    | 1383 | 0    | 0    | 0    | 0    | 0    | 34   | 0    | 0    | 0    | 0    | 0    | 0    | 0    | 0    | 0    | 0    | 0    | 0    | 0 |
| Haemophilus parahaemolyticus                           | 104  | 0    | 0    | 0    | 0    | 0    | 0    | 0    | 0    | 0    | 0    | 0    | 0    | 0    | 0    | 0    | 0    | 0    | 0    | 0    | 0    | 0    | 0 |
| Howardella                                             | 0    | 0    | 0    | 108  | 0    | 0    | 0    | 0    | 0    | 0    | 0    | 0    | 0    | 0    | 0    | 0    | 0    | 0    | 0    | 0    | 0    | 0    | 0 |
| Prevotella buccalis                                    | 0    | 0    | 0    | 206  | 0    | 0    | 0    | 0    | 0    | 0    | 0    | 0    | 0    | 0    | 0    | 0    | 0    | 0    | 0    | 0    | 47   | 0    | 0 |
| Corynebacterium auris                                  | 0    | 0    | 0    | 0    | 0    | 0    | 0    | 0    | 0    | 0    | 0    | 0    | 0    | 0    | 0    | 0    | 0    | 0    | 0    | 0    | 0    | 0    | 0 |
| Candidatus Mycoplasma gireddii                         | 0    | 0    | 0    | 0    | 0    | 0    | 0    | 0    | 0    | 0    | 0    | 0    | 0    | 0    | 0    | 0    | 0    | 0    | 0    | 0    | 0    | 0    | 0 |
| Alloicoccus                                            | 0    | 0    | 0    | 0    | 0    | 0    | 0    | 0    | 0    | 0    | 0    | 0    | 0    | 0    | 0    | 0    | 0    | 0    | 0    | 0    | 0    | 0    | 0 |
| Corynebacterium founierii/mucificiens/ureicelerivorans | 0    | 0    | 0    | 0    | 0    | 0    | 0    | 0    | 166  | 0    | 0    | 0    | 0    | 0    | 122  | 0    | 0    | 0    | 0    | 0    | 0    | 0    | 0 |
| Corynebacterium auris/timonense                        | 0    | 0    | 0    | 0    | 0    | 0    | 0    | 0    | 0    | 0    | 0    | 0    | 0    | 0    | 0    | 0    | 0    | 0    | 0    | 0    | 0    | 0    | 0 |
| Veillonella ratti/seminalis                            | 0    | 0    | 0    | 0    | 0    | 0    | 0    | 0    | 0    | 0    | 0    | 0    | 0    | 0    | 0    | 0    | 0    | 0    | 0    | 0    | 0    | 0    | 0 |



Samples S172 - S199

| Species                                    | S172 | S175 | S176 | S177 | S178 | S179 | S180 | S181 | S183 | S184 | S185 | S186 | S187 | S190 | S191 | S192 | S193 | S194 | S196 | S197 | S198 | S199 |
|--------------------------------------------|------|------|------|------|------|------|------|------|------|------|------|------|------|------|------|------|------|------|------|------|------|------|
| Lactobacillus gasseri                      | 0    | 0    | 0    | 0    | 0    | 0    | 0    | 0    | 0    | 0    | 0    | 0    | 0    | 0    | 0    | 0    | 0    | 0    | 1883 | 0    | 0    | 0    |
| Tissierella                                | 0    | 0    | 0    | 0    | 0    | 0    | 0    | 0    | 0    | 0    | 0    | 0    | 0    | 0    | 0    | 0    | 0    | 0    | 0    | 0    | 0    | 0    |
| Granulicatella adiacens                    | 55   | 0    | 0    | 0    | 0    | 0    | 0    | 0    | 0    | 0    | 0    | 0    | 0    | 110  | 0    | 0    | 0    | 0    | 0    | 0    | 0    | 0    |
| Sutterella                                 | 0    | 0    | 0    | 0    | 0    | 0    | 0    | 0    | 0    | 0    | 0    | 0    | 0    | 0    | 0    | 0    | 0    | 0    | 0    | 0    | 51   | 0    |
| Prevotella nanceiensis                     | 30   | 0    | 0    | 0    | 0    | 0    | 0    | 0    | 0    | 0    | 0    | 0    | 0    | 0    | 0    | 0    | 0    | 0    | 0    | 0    | 0    | 0    |
| Lactobacillus jensenii                     | 0    | 44   | 0    | 0    | 0    | 0    | 0    | 0    | 0    | 0    | 0    | 0    | 0    | 0    | 0    | 0    | 0    | 0    | 0    | 0    | 0    | 0    |
| Lactobacillus crispatus                    | 0    | 0    | 0    | 0    | 0    | 0    | 55   | 0    | 0    | 0    | 0    | 0    | 0    | 0    | 0    | 0    | 0    | 0    | 0    | 0    | 0    | 0    |
| Candidate Division TM7 vaginal (genus)     | 0    | 0    | 0    | 0    | 0    | 0    | 0    | 0    | 0    | 0    | 0    | 0    | 0    | 0    | 0    | 0    | 0    | 0    | 0    | 0    | 0    | 0    |
| Candidatus Saccharimonas                   | 154  | 0    | 0    | 0    | 0    | 0    | 0    | 0    | 0    | 0    | 0    | 0    | 0    | 0    | 0    | 0    | 0    | 0    | 0    | 0    | 0    | 0    |
| Peptococcus niger                          | 0    | 0    | 0    | 0    | 0    | 0    | 0    | 0    | 0    | 0    | 0    | 0    | 0    | 0    | 0    | 0    | 0    | 0    | 0    | 0    | 0    | 0    |
| Neisseria flavescens/perflava              | 234  | 0    | 0    | 0    | 0    | 0    | 0    | 32   | 0    | 0    | 0    | 0    | 0    | 74   | 0    | 0    | 0    | 0    | 0    | 0    | 0    | 0    |
| Gemella sanguinis                          | 0    | 0    | 0    | 0    | 0    | 0    | 0    | 0    | 0    | 0    | 0    | 0    | 0    | 0    | 0    | 0    | 0    | 0    | 0    | 0    | 0    | 0    |
| Porphyromonas                              | 352  | 0    | 0    | 0    | 0    | 0    | 0    | 0    | 0    | 0    | 0    | 0    | 0    | 0    | 0    | 0    | 0    | 0    | 0    | 0    | 26   | 48   |
| Prevotella                                 | 175  | 0    | 0    | 0    | 0    | 0    | 0    | 0    | 0    | 0    | 0    | 0    | 0    | 0    | 0    | 0    | 0    | 0    | 0    | 0    | 0    | 0    |
| Corynebacterium thomssenii                 | 0    | 0    | 0    | 46   | 0    | 0    | 1117 | 0    | 0    | 0    | 0    | 0    | 0    | 0    | 0    | 0    | 0    | 0    | 0    | 0    | 0    | 0    |
| Lachnospiraceae                            | 0    | 0    | 0    | 0    | 0    | 0    | 0    | 0    | 0    | 0    | 0    | 0    | 0    | 0    | 0    | 0    | 0    | 0    | 0    | 0    | 0    | 0    |
| Corynebacterium tuberculo-tearicum         | 0    | 0    | 0    | 0    | 0    | 0    | 0    | 0    | 0    | 0    | 0    | 0    | 0    | 0    | 0    | 0    | 0    | 0    | 0    | 0    | 0    | 0    |
| Dermabacter hominis                        | 0    | 0    | 0    | 0    | 0    | 0    | 178  | 0    | 0    | 0    | 58   | 0    | 0    | 0    | 0    | 0    | 0    | 0    | 0    | 0    | 0    | 0    |
| Veillonella rogosae                        | 169  | 0    | 0    | 0    | 0    | 0    | 0    | 25   | 0    | 0    | 0    | 0    | 0    | 0    | 0    | 0    | 0    | 0    | 0    | 0    | 0    | 0    |
| Actinomyces hongkongensis                  | 0    | 0    | 162  | 0    | 0    | 0    | 0    | 0    | 0    | 0    | 0    | 0    | 0    | 0    | 0    | 0    | 0    | 0    | 0    | 0    | 0    | 0    |
| Veillonella parvula/rogosae                | 136  | 0    | 0    | 0    | 0    | 0    | 0    | 0    | 0    | 0    | 0    | 0    | 0    | 0    | 0    | 0    | 0    | 0    | 0    | 0    | 0    | 0    |
| Anaerococcus provencensis                  | 0    | 0    | 0    | 0    | 104  | 0    | 0    | 0    | 0    | 0    | 163  | 0    | 0    | 0    | 0    | 0    | 0    | 0    | 0    | 0    | 0    | 0    |
| Porphyromonas sp. type 1                   | 0    | 0    | 0    | 0    | 0    | 0    | 0    | 0    | 0    | 0    | 0    | 0    | 0    | 0    | 0    | 0    | 0    | 0    | 0    | 0    | 0    | 0    |
| Brevibacterium paucivorans                 | 0    | 0    | 0    | 0    | 67   | 0    | 662  | 0    | 647  | 0    | 0    | 0    | 0    | 0    | 0    | 0    | 0    | 0    | 0    | 0    | 0    | 0    |
| Peptostreptococcus                         | 0    | 0    | 0    | 0    | 0    | 0    | 0    | 0    | 0    | 0    | 0    | 0    | 0    | 0    | 0    | 0    | 0    | 0    | 0    | 0    | 0    | 0    |
| Facklamia languida                         | 0    | 0    | 0    | 0    | 0    | 0    | 0    | 0    | 0    | 0    | 0    | 0    | 0    | 0    | 0    | 0    | 0    | 0    | 0    | 0    | 0    | 0    |
| Streptobacillus                            | 0    | 0    | 0    | 0    | 0    | 0    | 0    | 0    | 0    | 0    | 0    | 0    | 0    | 0    | 0    | 0    | 0    | 0    | 0    | 0    | 0    | 0    |
| Gemella haemolysans                        | 0    | 0    | 0    | 0    | 0    | 0    | 0    | 0    | 0    | 0    | 0    | 0    | 0    | 0    | 0    | 0    | 0    | 0    | 0    | 0    | 0    | 0    |
| Haemophilus sputorum                       | 2180 | 0    | 0    | 0    | 0    | 0    | 0    | 0    | 0    | 0    | 0    | 0    | 0    | 0    | 0    | 0    | 0    | 0    | 0    | 0    | 0    | 0    |
| Actinotignum urinale                       | 0    | 0    | 0    | 0    | 0    | 0    | 0    | 0    | 0    | 0    | 0    | 0    | 0    | 0    | 0    | 0    | 0    | 0    | 0    | 0    | 0    | 0    |
| Dialister pneumosintes                     | 0    | 0    | 0    | 0    | 0    | 0    | 0    | 0    | 0    | 0    | 0    | 0    | 0    | 0    | 0    | 0    | 0    | 0    | 0    | 0    | 0    | 0    |
| Treponema pallidum                         | 0    | 0    | 0    | 0    | 0    | 0    | 0    | 0    | 0    | 0    | 0    | 0    | 0    | 0    | 0    | 0    | 0    | 0    | 0    | 0    | 0    | 0    |
| Porphyromonas bennonis                     | 0    | 0    | 0    | 0    | 0    | 0    | 0    | 0    | 0    | 0    | 0    | 0    | 0    | 0    | 0    | 0    | 0    | 0    | 0    | 0    | 93   | 0    |
| Bergeyella                                 | 31   | 0    | 0    | 0    | 0    | 0    | 120  | 0    | 0    | 0    | 0    | 0    | 0    | 0    | 0    | 0    | 0    | 0    | 0    | 0    | 0    | 128  |
| Actinotignum schaalii/timonense            | 0    | 0    | 0    | 110  | 0    | 0    | 0    | 0    | 0    | 0    | 0    | 0    | 0    | 0    | 0    | 0    | 0    | 0    | 0    | 0    | 0    | 0    |
| Klebsiella aerogenes/Kluyvera cryocrescens | 0    | 0    | 0    | 0    | 0    | 0    | 0    | 0    | 0    | 0    | 0    | 0    | 0    | 0    | 0    | 0    | 0    | 0    | 0    | 0    | 0    | 0    |
| Rothia mucilaginosa                        | 848  | 0    | 0    | 0    | 0    | 0    | 0    | 93   | 0    | 0    | 186  | 0    | 0    | 126  | 0    | 0    | 198  | 0    | 0    | 0    | 0    | 0    |
| Solobacterium moorei                       | 31   | 0    | 0    | 0    | 0    | 0    | 0    | 0    | 0    | 0    | 0    | 0    | 0    | 0    | 0    | 0    | 0    | 0    | 0    | 0    | 0    | 0    |
| Mageeibacillus indolicus                   | 0    | 0    | 0    | 0    | 0    | 0    | 0    | 0    | 0    | 0    | 0    | 0    | 0    | 0    | 0    | 0    | 0    | 0    | 0    | 0    | 0    | 0    |
| Serratia urelytica                         | 0    | 0    | 0    | 0    | 0    | 0    | 0    | 0    | 0    | 0    | 0    | 0    | 0    | 0    | 0    | 0    | 0    | 0    | 0    | 0    | 0    | 0    |
| Peptoniphilus obesi                        | 0    | 0    | 0    | 0    | 0    | 0    | 0    | 0    | 0    | 0    | 0    | 0    | 0    | 0    | 0    | 0    | 0    | 0    | 0    | 0    | 89   | 0    |
| Peptoniphilus harei/phoceensis             | 0    | 0    | 0    | 0    | 0    | 0    | 0    | 0    | 0    | 0    | 0    | 0    | 0    | 0    | 0    | 0    | 0    | 0    | 0    | 0    | 26   | 0    |
| Corynebacterium atypicum                   | 0    | 0    | 0    | 0    | 0    | 0    | 0    | 0    | 0    | 0    | 0    | 0    | 0    | 0    | 0    | 0    | 0    | 0    | 0    | 0    | 0    | 0    |
| Atopobium minutum                          | 0    | 0    | 0    | 0    | 0    | 0    | 0    | 0    | 0    | 0    | 0    | 0    | 0    | 0    | 0    | 0    | 0    | 0    | 0    | 0    | 0    | 0    |
| Corynebacterium genitalium                 | 0    | 0    | 0    | 65   | 0    | 0    | 1764 | 0    | 0    | 0    | 0    | 0    | 0    | 0    | 0    | 0    | 0    | 0    | 0    | 0    | 0    | 0    |
| Bifidobacterium tsurumense                 | 0    | 0    | 0    | 0    | 0    | 0    | 0    | 0    | 0    | 0    | 0    | 0    | 0    | 0    | 0    | 0    | 0    | 0    | 0    | 0    | 0    | 0    |
| Micrococcus                                | 0    | 0    | 0    | 0    | 0    | 0    | 54   | 0    | 0    | 0    | 0    | 0    | 0    | 0    | 0    | 0    | 0    | 0    | 0    | 0    | 0    | 0    |
| Megasphaera genomsp. type_1                | 0    | 0    | 0    | 0    | 0    | 0    | 0    | 0    | 0    | 0    | 0    | 0    | 0    | 0    | 0    | 0    | 0    | 0    | 0    | 0    | 0    | 0    |
| Enhydrobacter                              | 0    | 0    | 0    | 0    | 0    | 0    | 0    | 0    | 0    | 0    | 0    | 0    | 0    | 0    | 0    | 0    | 0    | 0    | 0    | 0    | 0    | 0    |
| Fastidiosipila sanguinis                   | 0    | 0    | 0    | 0    | 0    | 0    | 0    | 0    | 0    | 0    | 0    | 0    | 0    | 0    | 0    | 0    | 0    | 0    | 0    | 0    | 0    | 0    |
| Prevotellamassilia                         | 81   | 0    | 0    | 0    | 0    | 0    | 0    | 0    | 0    | 0    | 0    | 0    | 0    | 0    | 0    | 0    | 0    | 0    | 0    | 0    | 0    | 0    |
| Peptostreptococcaceae                      | 0    | 0    | 0    | 0    | 0    | 0    | 0    | 0    | 0    | 0    | 0    | 0    | 0    | 0    | 0    | 0    | 0    | 0    | 0    | 0    | 0    | 0    |
| Morganella morganii                        | 0    | 0    | 0    | 0    | 0    | 0    | 0    | 0    | 0    | 0    | 0    | 0    | 0    | 0    | 0    | 0    | 0    | 0    | 0    | 0    | 0    | 0    |
| Neofamilia                                 | 0    | 0    | 0    | 0    | 0    | 0    | 0    | 0    | 0    | 0    | 0    | 0    | 0    | 0    | 0    | 0    | 0    | 0    | 0    | 0    | 0    | 0    |
| Pseudoclavibacter bifida                   | 0    | 0    | 0    | 0    | 0    | 0    | 0    | 59   | 0    | 0    | 0    | 0    | 0    | 0    | 0    | 0    | 0    | 0    | 0    | 0    | 0    | 0    |
| Helcococcus                                | 0    | 0    | 0    | 0    | 0    | 0    | 0    | 0    | 0    | 0    | 0    | 0    | 0    | 0    | 0    | 0    | 0    | 0    | 0    | 0    | 0    | 0    |
| Brevibacterium ravenspurgense              | 0    | 0    | 0    | 0    | 0    | 0    | 352  | 0    | 0    | 0    | 264  | 0    | 0    | 0    | 0    | 0    | 0    | 0    | 0    | 0    | 0    | 0    |
| Moryella indoligenes                       | 0    | 0    | 0    | 0    | 0    | 0    | 0    | 0    | 0    | 0    | 0    | 0    | 0    | 0    | 0    | 0    | 0    | 0    | 0    | 0    | 0    | 0    |
| Olegusella massiliensis                    | 0    | 0    | 0    | 0    | 0    | 0    | 0    | 0    | 0    | 0    | 0    | 0    | 0    | 0    | 0    | 0    | 0    | 0    | 0    | 0    | 49   | 0    |
| Morococcus cerebrosus                      | 0    | 0    | 0    | 0    | 0    | 0    | 0    | 0    | 0    | 0    | 0    | 0    | 0    | 0    | 0    | 0    | 0    | 0    | 0    | 0    | 0    | 0    |
| Prevotella scopos                          | 0    | 0    | 0    | 0    | 0    | 0    | 0    | 0    | 0    | 0    | 0    | 0    | 0    | 0    | 0    | 0    | 0    | 0    | 0    | 0    | 0    | 0    |
| Veillonella parvula/tobetsuensis           | 0    | 0    | 0    | 0    | 0    | 0    | 0    | 0    | 0    | 0    | 0    | 0    | 0    | 0    | 0    | 0    | 0    | 0    | 0    | 0    | 0    | 0    |
| Moryella                                   | 0    | 0    | 0    | 0    | 0    | 0    | 0    | 0    | 0    | 0    | 0    | 0    | 0    | 0    | 0    | 0    | 0    | 0    | 0    | 0    | 0    | 0    |
| Atopobium parvulum                         | 49   | 0    | 0    | 0    | 0    | 0    | 0    | 0    | 0    | 0    | 0    | 0    | 0    | 0    | 0    | 0    | 0    | 0    | 0    | 0    | 0    | 0    |
| Serratia marcescens                        | 0    | 0    | 0    | 0    | 0    | 0    | 0    | 0    | 0    | 0    | 0    | 0    | 0    | 0    | 0    | 0    | 0    | 0    | 0    | 0    | 0    | 0    |
| Collinsella aerofaciens                    | 0    | 0    | 0    | 0    | 0    | 0    | 0    | 0    | 0    | 0    | 0    | 0    | 0    | 0    | 0    | 0    | 0    | 0    | 0    | 0    | 0    | 0    |
| Curvibacter                                | 0    | 0    | 0    | 0    | 0    | 0    | 0    | 0    | 0    | 0    | 0    | 0    | 0    | 0    | 0    | 0    | 0    | 0    | 0    | 0    | 0    | 0    |
| Rothia dentocariosa                        | 0    | 0    | 0    | 0    | 0    | 0    | 0    | 0    | 0    | 0    | 0    | 0    | 0    | 0    | 0    | 0    | 0    | 0    | 0    | 0    | 0    | 0    |
| Prevotella bergensis                       | 0    | 0    | 0    | 39   | 0    | 0    | 0    | 0    | 0    | 0    | 0    | 0    | 0    | 0    | 0    | 0    | 0    | 0    | 0    | 0    | 0    | 0    |
| Corynebacterium sundsvallense              | 0    | 0    | 0    | 0    | 0    | 0    | 0    | 0    | 0    | 0    | 32   | 0    | 0    | 0    | 0    | 0    | 0    | 0    | 0    | 0    | 0    | 0    |

Samples S172 - S199

| Species                                       | S172 | S175 | S176 | S177 | S178 | S179 | S180 | S181 | S183 | S184 | S185 | S186 | S187 | S190 | S191 | S192 | S193 | S194 | S196 | S197 | S198 | S199 |
|-----------------------------------------------|------|------|------|------|------|------|------|------|------|------|------|------|------|------|------|------|------|------|------|------|------|------|
| Coriobacteria                                 | 0    | 0    | 0    | 0    | 0    | 0    | 0    | 0    | 0    | 0    | 0    | 0    | 0    | 0    | 0    | 0    | 0    | 0    | 0    | 0    | 0    | 0    |
| Neisseria meningitidis                        | 0    | 0    | 0    | 0    | 0    | 0    | 0    | 0    | 0    | 0    | 0    | 0    | 0    | 0    | 0    | 0    | 0    | 0    | 0    | 0    | 0    | 0    |
| Dermacoccus nishinomiyaensis                  | 0    | 0    | 0    | 0    | 0    | 0    | 98   | 0    | 0    | 0    | 0    | 0    | 0    | 0    | 0    | 0    | 0    | 0    | 0    | 0    | 0    | 0    |
| Leptotrichia                                  | 0    | 0    | 0    | 0    | 0    | 0    | 0    | 0    | 0    | 0    | 0    | 0    | 0    | 0    | 0    | 0    | 0    | 0    | 0    | 0    | 0    | 0    |
| Microbacteriaceae                             | 0    | 0    | 0    | 0    | 0    | 0    | 0    | 0    | 0    | 0    | 0    | 0    | 0    | 0    | 0    | 0    | 0    | 0    | 0    | 0    | 0    | 0    |
| Klebsiella pneumoniae/variiicola              | 0    | 0    | 0    | 0    | 0    | 0    | 0    | 0    | 0    | 0    | 0    | 0    | 0    | 0    | 0    | 0    | 0    | 0    | 0    | 0    | 0    | 0    |
| Hafnia alvei                                  | 0    | 0    | 0    | 0    | 0    | 0    | 0    | 0    | 0    | 0    | 0    | 0    | 0    | 0    | 0    | 0    | 0    | 0    | 0    | 0    | 0    | 0    |
| Caulobacter                                   | 0    | 0    | 0    | 0    | 0    | 0    | 0    | 0    | 0    | 0    | 0    | 0    | 0    | 30   | 34   | 0    | 0    | 0    | 0    | 0    | 0    | 0    |
| Lactobacillus reuteri                         | 0    | 0    | 0    | 0    | 0    | 0    | 0    | 0    | 0    | 0    | 0    | 0    | 0    | 0    | 0    | 0    | 0    | 0    | 0    | 0    | 0    | 0    |
| Gemella morbillorum                           | 0    | 0    | 0    | 0    | 0    | 0    | 0    | 0    | 0    | 0    | 0    | 0    | 0    | 0    | 0    | 0    | 0    | 0    | 0    | 0    | 0    | 0    |
| Rothia                                        | 0    | 0    | 0    | 0    | 0    | 0    | 0    | 0    | 0    | 0    | 0    | 0    | 0    | 0    | 0    | 0    | 0    | 0    | 0    | 0    | 0    | 0    |
| Campylobacter                                 | 0    | 0    | 0    | 0    | 0    | 0    | 0    | 0    | 0    | 0    | 0    | 0    | 0    | 0    | 0    | 0    | 0    | 0    | 0    | 0    | 0    | 0    |
| Prevotella genogroup 3                        | 0    | 0    | 0    | 0    | 0    | 0    | 0    | 0    | 0    | 0    | 0    | 0    | 0    | 0    | 0    | 0    | 0    | 0    | 0    | 0    | 0    | 0    |
| Staphylococcus warneri                        | 0    | 0    | 0    | 0    | 0    | 0    | 0    | 0    | 0    | 0    | 0    | 0    | 0    | 0    | 0    | 0    | 0    | 0    | 0    | 0    | 0    | 0    |
| Blautia wexlerae                              | 0    | 0    | 0    | 0    | 0    | 0    | 0    | 0    | 0    | 0    | 0    | 0    | 0    | 0    | 0    | 0    | 0    | 0    | 0    | 0    | 0    | 0    |
| Lachnoanaerobaculum                           | 0    | 0    | 0    | 0    | 0    | 0    | 0    | 0    | 0    | 0    | 0    | 0    | 0    | 0    | 0    | 0    | 0    | 0    | 0    | 0    | 0    | 0    |
| Anaerococcus hydrogenalis/senegalensis        | 0    | 0    | 0    | 0    | 0    | 0    | 0    | 0    | 0    | 0    | 0    | 0    | 0    | 0    | 0    | 0    | 0    | 0    | 0    | 0    | 0    | 0    |
| Brevibacterium mcbrellneri                    | 0    | 0    | 0    | 0    | 0    | 0    | 0    | 0    | 0    | 0    | 54   | 0    | 0    | 0    | 0    | 0    | 0    | 0    | 0    | 0    | 0    | 0    |
| Corynebacterium glaucum                       | 0    | 0    | 0    | 0    | 0    | 0    | 39   | 0    | 0    | 0    | 0    | 0    | 0    | 0    | 0    | 0    | 0    | 0    | 0    | 0    | 0    | 0    |
| Prevotella salivae                            | 27   | 0    | 0    | 0    | 0    | 0    | 0    | 0    | 0    | 0    | 0    | 0    | 0    | 0    | 0    | 0    | 0    | 0    | 0    | 0    | 0    | 0    |
| Coriobacteriaceae                             | 0    | 0    | 0    | 0    | 0    | 0    | 0    | 0    | 0    | 0    | 0    | 0    | 0    | 0    | 0    | 0    | 0    | 0    | 0    | 0    | 0    | 0    |
| Bulleidia                                     | 0    | 0    | 35   | 0    | 0    | 0    | 0    | 0    | 0    | 0    | 0    | 0    | 0    | 0    | 0    | 0    | 0    | 0    | 0    | 0    | 0    | 0    |
| Peptococcus                                   | 0    | 0    | 0    | 0    | 0    | 0    | 0    | 0    | 0    | 0    | 0    | 0    | 0    | 0    | 0    | 0    | 0    | 0    | 0    | 0    | 0    | 0    |
| Serratia marcescens/nematodiphila             | 0    | 0    | 0    | 0    | 0    | 0    | 0    | 0    | 0    | 0    | 0    | 0    | 0    | 0    | 0    | 0    | 0    | 0    | 0    | 0    | 0    | 0    |
| Leptotrichia wadei                            | 0    | 0    | 0    | 0    | 0    | 0    | 0    | 0    | 0    | 0    | 0    | 0    | 0    | 0    | 0    | 0    | 0    | 0    | 0    | 0    | 0    | 0    |
| Neisseriaceae                                 | 0    | 0    | 0    | 0    | 0    | 0    | 0    | 0    | 0    | 0    | 0    | 0    | 0    | 0    | 0    | 0    | 0    | 0    | 0    | 0    | 0    | 0    |
| Aerococcus sanguinicola                       | 0    | 0    | 0    | 0    | 0    | 0    | 0    | 0    | 0    | 0    | 0    | 0    | 0    | 0    | 0    | 0    | 0    | 0    | 0    | 0    | 0    | 0    |
| Criobacterium bergeronii                      | 0    | 0    | 0    | 0    | 0    | 0    | 0    | 0    | 0    | 0    | 0    | 0    | 0    | 0    | 0    | 0    | 0    | 0    | 0    | 0    | 0    | 0    |
| Brevibacterium luteolum                       | 0    | 0    | 0    | 0    | 0    | 0    | 0    | 0    | 0    | 0    | 282  | 0    | 0    | 0    | 0    | 0    | 0    | 0    | 0    | 0    | 0    | 0    |
| Klebsiella pneumoniae                         | 0    | 0    | 0    | 0    | 0    | 0    | 0    | 0    | 0    | 0    | 0    | 0    | 0    | 0    | 0    | 0    | 0    | 0    | 0    | 0    | 0    | 0    |
| Actinomyces oris/viscosus                     | 0    | 0    | 0    | 0    | 0    | 0    | 0    | 0    | 0    | 0    | 0    | 0    | 0    | 0    | 0    | 0    | 0    | 0    | 0    | 0    | 0    | 0    |
| Mycobacterium chelonae complex                | 0    | 0    | 0    | 0    | 0    | 0    | 0    | 0    | 0    | 0    | 0    | 0    | 0    | 33   | 0    | 0    | 0    | 0    | 0    | 0    | 0    | 0    |
| Corynebacterium jeddahense                    | 0    | 0    | 0    | 0    | 0    | 0    | 0    | 0    | 0    | 0    | 0    | 0    | 0    | 0    | 0    | 0    | 0    | 0    | 0    | 0    | 0    | 0    |
| Peptostreptococcus stomatis                   | 0    | 0    | 0    | 0    | 0    | 0    | 0    | 0    | 0    | 0    | 0    | 0    | 0    | 0    | 0    | 0    | 0    | 0    | 0    | 0    | 0    | 0    |
| Megasphaera                                   | 0    | 0    | 0    | 0    | 0    | 0    | 0    | 0    | 0    | 0    | 0    | 0    | 0    | 0    | 0    | 0    | 0    | 0    | 0    | 0    | 0    | 0    |
| Campylobacter rectus/showae                   | 0    | 0    | 0    | 0    | 0    | 0    | 0    | 0    | 0    | 0    | 0    | 0    | 0    | 0    | 0    | 0    | 0    | 0    | 0    | 0    | 0    | 0    |
| Staphylococcus carnosus/condimenti            | 0    | 0    | 0    | 0    | 0    | 0    | 0    | 0    | 0    | 0    | 333  | 0    | 0    | 0    | 0    | 0    | 0    | 0    | 0    | 0    | 0    | 0    |
| Prevotella pallens                            | 0    | 0    | 0    | 0    | 0    | 0    | 0    | 0    | 0    | 0    | 0    | 0    | 0    | 0    | 0    | 0    | 0    | 0    | 0    | 0    | 0    | 0    |
| Prolinoborus fasciculus/Acinetobacter lwoffii | 0    | 0    | 0    | 0    | 0    | 0    | 0    | 0    | 0    | 0    | 0    | 0    | 0    | 0    | 0    | 0    | 0    | 0    | 0    | 0    | 0    | 0    |
| Staphylococcus nepalensis                     | 0    | 0    | 0    | 0    | 0    | 0    | 0    | 0    | 0    | 0    | 0    | 0    | 0    | 0    | 0    | 0    | 0    | 0    | 0    | 0    | 0    | 0    |
| Staphylococcaceae                             | 0    | 0    | 0    | 0    | 0    | 0    | 0    | 0    | 0    | 0    | 30   | 0    | 0    | 0    | 0    | 0    | 0    | 0    | 0    | 0    | 0    | 0    |
| Cruoricaptor                                  | 0    | 0    | 0    | 0    | 0    | 0    | 0    | 0    | 0    | 0    | 0    | 0    | 0    | 0    | 0    | 0    | 0    | 0    | 0    | 0    | 0    | 0    |
| [Eubacterium] hallii                          | 0    | 0    | 0    | 0    | 0    | 0    | 0    | 0    | 0    | 0    | 0    | 0    | 0    | 0    | 0    | 0    | 0    | 0    | 0    | 0    | 0    | 0    |
| BVAB1 (species)                               | 0    | 0    | 0    | 0    | 0    | 0    | 0    | 0    | 0    | 0    | 0    | 0    | 0    | 0    | 0    | 0    | 0    | 0    | 0    | 0    | 0    | 0    |
| Stomatobaculum                                | 0    | 0    | 0    | 0    | 0    | 0    | 0    | 0    | 0    | 0    | 0    | 0    | 0    | 0    | 0    | 0    | 0    | 0    | 0    | 0    | 0    | 0    |
| Mycoplasma                                    | 0    | 0    | 0    | 0    | 0    | 0    | 0    | 0    | 0    | 0    | 0    | 0    | 0    | 0    | 0    | 0    | 0    | 0    | 0    | 0    | 0    | 0    |
| Catenibacterium mitsuokai                     | 0    | 0    | 0    | 0    | 0    | 0    | 0    | 0    | 0    | 0    | 0    | 0    | 0    | 0    | 0    | 0    | 0    | 0    | 0    | 0    | 0    | 0    |
| Veillonella parvula                           | 0    | 0    | 0    | 0    | 0    | 0    | 0    | 0    | 0    | 0    | 0    | 0    | 0    | 0    | 0    | 0    | 0    | 0    | 0    | 0    | 0    | 0    |
| Corynebacterium kroppenstedtii                | 0    | 0    | 0    | 0    | 0    | 0    | 0    | 0    | 0    | 0    | 0    | 0    | 0    | 0    | 0    | 0    | 0    | 0    | 0    | 0    | 0    | 0    |
| Eremococcus coleocola                         | 0    | 0    | 0    | 0    | 0    | 0    | 0    | 0    | 0    | 0    | 0    | 0    | 0    | 0    | 0    | 0    | 0    | 0    | 0    | 0    | 0    | 0    |
| Actinomyces europaeus                         | 0    | 0    | 0    | 0    | 0    | 0    | 0    | 0    | 0    | 0    | 0    | 0    | 0    | 0    | 0    | 0    | 0    | 0    | 0    | 0    | 0    | 0    |
| Peptoniphilus senegalensis                    | 0    | 0    | 0    | 0    | 0    | 0    | 0    | 0    | 0    | 0    | 0    | 0    | 0    | 0    | 0    | 0    | 0    | 0    | 0    | 0    | 0    | 0    |
| Corynebacterium afermentans/humii             | 0    | 0    | 0    | 0    | 0    | 0    | 61   | 0    | 0    | 0    | 0    | 0    | 0    | 0    | 0    | 0    | 0    | 0    | 0    | 0    | 0    | 0    |
| Acinetobacter                                 | 0    | 0    | 0    | 0    | 0    | 0    | 0    | 0    | 0    | 0    | 0    | 0    | 473  | 0    | 0    | 0    | 0    | 0    | 0    | 0    | 0    | 0    |
| Eggerthellaceae                               | 0    | 0    | 0    | 0    | 0    | 0    | 0    | 0    | 0    | 0    | 0    | 0    | 0    | 0    | 0    | 0    | 0    | 0    | 0    | 0    | 0    | 0    |
| Corynebacterium mucifaciens                   | 0    | 0    | 0    | 0    | 0    | 0    | 0    | 0    | 0    | 0    | 0    | 0    | 0    | 0    | 0    | 78   | 0    | 0    | 0    | 0    | 0    | 0    |
| Filifactor                                    | 0    | 0    | 0    | 0    | 0    | 0    | 0    | 0    | 0    | 0    | 0    | 0    | 0    | 0    | 0    | 0    | 0    | 0    | 0    | 0    | 0    | 0    |
| Ruminococcus faecis                           | 0    | 0    | 0    | 0    | 0    | 0    | 0    | 0    | 0    | 0    | 0    | 0    | 0    | 0    | 0    | 0    | 0    | 0    | 0    | 0    | 0    | 0    |
| Lactobacillus                                 | 0    | 0    | 0    | 0    | 0    | 0    | 0    | 0    | 0    | 0    | 0    | 0    | 0    | 0    | 0    | 0    | 0    | 0    | 0    | 0    | 0    | 0    |
| Peptoniphilus grossensis/rhinitidis           | 0    | 0    | 0    | 0    | 0    | 0    | 0    | 0    | 0    | 0    | 0    | 0    | 0    | 0    | 0    | 0    | 0    | 0    | 0    | 0    | 0    | 0    |
| Aerococcus urinaequi/viridans                 | 0    | 0    | 0    | 0    | 0    | 0    | 0    | 0    | 0    | 0    | 0    | 54   | 0    | 0    | 0    | 0    | 0    | 0    | 0    | 0    | 0    | 0    |
| Anaerostipes hadrus                           | 0    | 0    | 0    | 0    | 0    | 0    | 0    | 0    | 0    | 0    | 0    | 0    | 0    | 0    | 0    | 0    | 0    | 0    | 0    | 0    | 0    | 0    |
| Lagierella                                    | 0    | 0    | 0    | 0    | 0    | 0    | 0    | 0    | 0    | 0    | 0    | 0    | 0    | 0    | 0    | 0    | 0    | 0    | 0    | 0    | 0    | 0    |
| Neisseria cinerea/meningitidis                | 26   | 0    | 0    | 0    | 0    | 0    | 0    | 0    | 0    | 0    | 32   | 0    | 0    | 0    | 0    | 0    | 0    | 0    | 0    | 0    | 0    | 0    |
| Micrococcus lylae                             | 0    | 0    | 0    | 0    | 0    | 0    | 0    | 0    | 0    | 0    | 67   | 0    | 0    | 0    | 0    | 0    | 0    | 0    | 0    | 0    | 0    | 0    |
| Staphylococcus cohnii                         | 0    | 0    | 0    | 0    | 0    | 0    | 243  | 0    | 0    | 0    | 0    | 0    | 0    | 0    | 0    | 0    | 0    | 0    | 0    | 0    | 0    | 0    |
| Casaltella massiliensis                       | 0    | 0    | 0    | 0    | 0    | 0    | 0    | 0    | 0    | 0    | 0    | 0    | 0    | 0    | 0    | 0    | 0    | 0    | 0    | 0    | 0    | 0    |
| Stomatobaculum longum                         | 0    | 0    | 0    | 0    | 0    | 0    | 0    | 0    | 0    | 0    | 0    | 0    | 0    | 0    | 0    | 0    | 0    | 0    | 0    | 0    | 0    | 0    |
| Lautropia                                     | 0    | 0    | 0    | 0    | 0    | 0    | 0    | 0    | 0    | 0    | 0    | 0    | 0    | 0    | 0    | 0    | 0    | 0    | 0    | 0    | 0    | 0    |
| Fastidiosipila                                | 0    | 0    | 0    | 0    | 0    | 0    | 0    | 0    | 0    | 0    | 0    | 0    | 0    | 0    | 0    | 0    | 0    | 0    | 0    | 0    | 0    | 0    |

Samples S172 - S199

| Species                                      | S172 | S175 | S176 | S177 | S178 | S179 | S180 | S181 | S183 | S184 | S185 | S186 | S187 | S190 | S191 | S192 | S193 | S194 | S196 | S197 | S198 | S199 |
|----------------------------------------------|------|------|------|------|------|------|------|------|------|------|------|------|------|------|------|------|------|------|------|------|------|------|
| Corynebacterium durum                        | 0    | 0    | 0    | 0    | 0    | 0    | 0    | 0    | 0    | 0    | 0    | 0    | 0    | 65   | 0    | 0    | 0    | 0    | 0    | 0    | 0    | 0    |
| Actinomyces graevenitzi                      | 0    | 0    | 0    | 0    | 0    | 0    | 0    | 0    | 0    | 0    | 0    | 0    | 0    | 0    | 0    | 0    | 63   | 0    | 0    | 0    | 0    | 0    |
| Staphylococcus cohnii/saprophyticus          | 0    | 0    | 0    | 0    | 0    | 0    | 0    | 0    | 0    | 0    | 0    | 0    | 0    | 0    | 0    | 0    | 0    | 0    | 0    | 0    | 0    | 0    |
| Leptotrichia trevisanii                      | 0    | 0    | 0    | 0    | 0    | 0    | 0    | 0    | 0    | 0    | 0    | 0    | 0    | 0    | 0    | 0    | 0    | 0    | 0    | 0    | 0    | 0    |
| Candidatus Paraburkholderia calva            | 0    | 0    | 0    | 0    | 0    | 0    | 0    | 0    | 0    | 0    | 0    | 0    | 0    | 0    | 0    | 0    | 0    | 0    | 0    | 0    | 0    | 0    |
| Actinomyces urogenitalis                     | 0    | 0    | 0    | 0    | 0    | 0    | 0    | 0    | 0    | 0    | 0    | 0    | 0    | 0    | 0    | 0    | 0    | 0    | 0    | 0    | 0    | 0    |
| Clostridiales                                | 0    | 0    | 0    | 0    | 0    | 0    | 0    | 0    | 0    | 0    | 0    | 0    | 0    | 0    | 0    | 0    | 0    | 0    | 0    | 0    | 0    | 0    |
| Pasteurella caballi                          | 0    | 0    | 0    | 0    | 0    | 0    | 0    | 0    | 0    | 0    | 0    | 0    | 0    | 0    | 0    | 0    | 0    | 0    | 0    | 0    | 0    | 0    |
| Fusobacterium hwasookii/nucleatum            | 0    | 0    | 0    | 0    | 0    | 0    | 0    | 0    | 0    | 0    | 0    | 0    | 0    | 0    | 0    | 0    | 0    | 0    | 0    | 0    | 0    | 0    |
| Corynebacterium riegelii                     | 0    | 0    | 0    | 0    | 0    | 0    | 0    | 0    | 0    | 0    | 0    | 0    | 0    | 0    | 0    | 0    | 0    | 0    | 0    | 0    | 0    | 0    |
| Hafnia                                       | 0    | 0    | 0    | 0    | 0    | 0    | 0    | 0    | 0    | 0    | 0    | 0    | 0    | 0    | 0    | 0    | 0    | 0    | 0    | 0    | 0    | 0    |
| Staphylococcus equorum/saprophyticus/xylosus | 0    | 0    | 0    | 0    | 0    | 0    | 0    | 0    | 0    | 0    | 0    | 0    | 0    | 0    | 0    | 0    | 0    | 0    | 0    | 0    | 0    | 0    |
| Acinetobacter lwoffii                        | 0    | 0    | 0    | 0    | 0    | 0    | 0    | 0    | 0    | 0    | 0    | 0    | 108  | 0    | 0    | 0    | 0    | 0    | 0    | 0    | 0    | 0    |
| Micrococcus cohnii                           | 0    | 0    | 0    | 0    | 0    | 0    | 0    | 0    | 0    | 0    | 0    | 0    | 0    | 0    | 0    | 0    | 0    | 0    | 0    | 0    | 0    | 0    |
| Pseudoclavibacter faecalis                   | 0    | 0    | 0    | 0    | 0    | 0    | 0    | 0    | 0    | 0    | 32   | 0    | 0    | 0    | 0    | 0    | 0    | 0    | 0    | 0    | 0    | 0    |
| Leptotrichia buccalis                        | 0    | 0    | 0    | 0    | 0    | 0    | 0    | 0    | 0    | 0    | 0    | 0    | 0    | 0    | 0    | 0    | 0    | 0    | 0    | 0    | 0    | 0    |
| Actinomyces                                  | 0    | 0    | 0    | 0    | 0    | 0    | 0    | 0    | 0    | 0    | 0    | 0    | 0    | 29   | 0    | 0    | 0    | 0    | 0    | 0    | 0    | 0    |
| Fusobacterium nucleatum/periodonticum        | 0    | 0    | 0    | 0    | 0    | 0    | 0    | 0    | 0    | 0    | 0    | 0    | 0    | 0    | 0    | 0    | 0    | 0    | 0    | 0    | 0    | 0    |
| Lactobacillus saerimneri                     | 0    | 0    | 0    | 0    | 0    | 0    | 0    | 0    | 0    | 0    | 0    | 0    | 0    | 0    | 0    | 0    | 0    | 0    | 0    | 0    | 0    | 0    |
| Actinomycetaceae                             | 0    | 0    | 0    | 0    | 0    | 0    | 0    | 0    | 0    | 0    | 0    | 0    | 0    | 0    | 0    | 0    | 0    | 0    | 0    | 0    | 0    | 0    |
| Dialister                                    | 0    | 0    | 0    | 0    | 0    | 0    | 0    | 0    | 0    | 0    | 0    | 0    | 0    | 0    | 0    | 0    | 0    | 0    | 0    | 0    | 0    | 0    |
| Neisseria mucosa/subflava                    | 0    | 0    | 0    | 0    | 0    | 0    | 0    | 0    | 0    | 0    | 0    | 0    | 0    | 0    | 0    | 0    | 0    | 0    | 0    | 0    | 0    | 0    |
| Paracoccus                                   | 0    | 0    | 0    | 0    | 0    | 0    | 0    | 0    | 0    | 0    | 0    | 0    | 0    | 0    | 0    | 0    | 0    | 0    | 0    | 0    | 0    | 0    |
| Acinetobacter haemolyticus/johnsonii         | 0    | 0    | 0    | 0    | 0    | 0    | 0    | 0    | 0    | 0    | 0    | 0    | 119  | 0    | 0    | 0    | 0    | 0    | 0    | 0    | 0    | 0    |
| Neisseria subflava                           | 0    | 0    | 0    | 0    | 0    | 0    | 0    | 0    | 0    | 0    | 0    | 0    | 0    | 0    | 0    | 0    | 0    | 0    | 0    | 0    | 0    | 0    |
| Acinetobacter proteolyticus                  | 0    | 0    | 0    | 0    | 0    | 0    | 0    | 0    | 0    | 0    | 0    | 0    | 0    | 0    | 0    | 0    | 0    | 0    | 0    | 0    | 0    | 0    |
| Dorea formicigenerans                        | 0    | 0    | 0    | 0    | 0    | 0    | 0    | 0    | 0    | 0    | 0    | 0    | 0    | 0    | 0    | 0    | 0    | 0    | 0    | 0    | 0    | 0    |
| Corynebacterium tuscaniense                  | 0    | 0    | 0    | 0    | 0    | 0    | 0    | 0    | 0    | 0    | 76   | 0    | 0    | 0    | 0    | 0    | 0    | 0    | 0    | 0    | 0    | 0    |
| Massiliomicrobiota timonensis                | 0    | 0    | 0    | 0    | 0    | 0    | 0    | 0    | 0    | 0    | 0    | 0    | 0    | 0    | 0    | 0    | 0    | 0    | 0    | 0    | 0    | 0    |
| Fusobacterium hwasookii                      | 0    | 0    | 0    | 0    | 0    | 0    | 0    | 0    | 0    | 0    | 0    | 0    | 0    | 0    | 0    | 0    | 0    | 0    | 0    | 0    | 0    | 0    |
| Pseudoglutamicibacter albus                  | 0    | 0    | 0    | 0    | 0    | 0    | 0    | 0    | 0    | 0    | 0    | 0    | 0    | 0    | 0    | 0    | 0    | 0    | 0    | 0    | 0    | 0    |
| Clostridiales Family XIII. Incertae Sedis    | 0    | 0    | 0    | 0    | 0    | 0    | 0    | 0    | 0    | 0    | 0    | 0    | 0    | 0    | 0    | 0    | 0    | 0    | 0    | 0    | 0    | 0    |
| Kocuria marina/rhizophila                    | 0    | 0    | 0    | 0    | 0    | 0    | 0    | 0    | 0    | 0    | 0    | 0    | 0    | 0    | 0    | 0    | 0    | 0    | 0    | 0    | 0    | 0    |
| Kocuria                                      | 0    | 0    | 0    | 0    | 0    | 0    | 0    | 0    | 0    | 0    | 0    | 0    | 0    | 0    | 0    | 0    | 0    | 0    | 0    | 0    | 0    | 0    |
| Alloprevotella rava                          | 0    | 0    | 0    | 0    | 0    | 0    | 0    | 0    | 0    | 0    | 0    | 0    | 0    | 0    | 0    | 0    | 0    | 0    | 0    | 0    | 0    | 0    |
| Staphylococcus pettenkoferi                  | 0    | 0    | 0    | 0    | 0    | 0    | 34   | 0    | 0    | 0    | 0    | 0    | 0    | 0    | 0    | 0    | 0    | 0    | 0    | 0    | 0    | 0    |
| Streptococcus pseudoporcinus                 | 0    | 0    | 0    | 0    | 0    | 0    | 0    | 0    | 0    | 0    | 0    | 0    | 0    | 0    | 0    | 0    | 0    | 0    | 0    | 0    | 0    | 0    |
| Kingella                                     | 0    | 0    | 0    | 0    | 0    | 0    | 0    | 0    | 0    | 0    | 0    | 0    | 0    | 0    | 0    | 0    | 0    | 0    | 0    | 0    | 0    | 0    |
| Eikenella                                    | 0    | 0    | 0    | 0    | 0    | 0    | 0    | 0    | 0    | 0    | 0    | 0    | 0    | 0    | 0    | 0    | 0    | 0    | 0    | 0    | 0    | 0    |
| Actinomyces odontolyticus                    | 0    | 0    | 0    | 0    | 0    | 0    | 0    | 0    | 0    | 0    | 0    | 0    | 0    | 60   | 0    | 0    | 0    | 0    | 0    | 0    | 0    | 0    |
| Corynebacterium sphenisci                    | 0    | 0    | 0    | 0    | 0    | 0    | 0    | 0    | 0    | 0    | 0    | 0    | 0    | 0    | 0    | 0    | 0    | 0    | 0    | 0    | 0    | 0    |
| Cutibacterium                                | 0    | 0    | 0    | 0    | 0    | 0    | 0    | 0    | 0    | 0    | 0    | 0    | 0    | 0    | 0    | 0    | 0    | 0    | 0    | 0    | 0    | 0    |
| Staphylococcus xylosus                       | 0    | 0    | 0    | 0    | 0    | 0    | 0    | 0    | 0    | 0    | 0    | 0    | 0    | 0    | 0    | 0    | 0    | 0    | 0    | 0    | 0    | 0    |
| Burkholderiales                              | 0    | 0    | 0    | 0    | 0    | 0    | 0    | 0    | 0    | 0    | 0    | 0    | 0    | 0    | 0    | 0    | 0    | 0    | 0    | 0    | 0    | 0    |
| Massiliomicrobiota/Mycoplasma                | 0    | 0    | 0    | 0    | 0    | 0    | 0    | 0    | 0    | 0    | 0    | 0    | 0    | 0    | 0    | 0    | 0    | 0    | 0    | 0    | 0    | 0    |
| Bacteroidales                                | 0    | 0    | 0    | 0    | 0    | 0    | 0    | 0    | 0    | 0    | 0    | 0    | 0    | 0    | 0    | 0    | 0    | 0    | 0    | 0    | 0    | 0    |
| Campylobacter fetus                          | 0    | 0    | 0    | 0    | 0    | 0    | 0    | 0    | 0    | 0    | 0    | 0    | 0    | 0    | 0    | 0    | 0    | 0    | 0    | 0    | 0    | 0    |
| Prevotella aurantiaca                        | 0    | 0    | 0    | 0    | 0    | 0    | 0    | 0    | 0    | 0    | 0    | 0    | 0    | 0    | 0    | 0    | 0    | 0    | 0    | 0    | 0    | 0    |
| Corynebacterium freneyi/xerosis              | 0    | 0    | 0    | 0    | 0    | 0    | 0    | 0    | 0    | 0    | 0    | 0    | 0    | 0    | 0    | 0    | 0    | 0    | 0    | 0    | 0    | 0    |
| Aerococcaceae                                | 0    | 0    | 0    | 0    | 0    | 0    | 0    | 0    | 0    | 0    | 0    | 0    | 0    | 0    | 0    | 0    | 0    | 0    | 0    | 0    | 0    | 0    |
| Moraxella lacunata                           | 0    | 0    | 0    | 0    | 0    | 0    | 0    | 0    | 0    | 0    | 0    | 0    | 0    | 0    | 0    | 0    | 0    | 0    | 0    | 0    | 0    | 0    |
| Corynebacterium accolens/macginleyi          | 0    | 0    | 0    | 0    | 0    | 0    | 0    | 0    | 0    | 0    | 0    | 0    | 0    | 0    | 0    | 0    | 0    | 0    | 0    | 0    | 0    | 0    |
| Massilia aurea                               | 0    | 0    | 0    | 0    | 0    | 0    | 0    | 0    | 0    | 0    | 0    | 0    | 0    | 0    | 0    | 0    | 0    | 0    | 0    | 0    | 0    | 0    |
| Corynebacterium casei                        | 0    | 0    | 0    | 0    | 0    | 0    | 0    | 0    | 0    | 0    | 0    | 0    | 0    | 0    | 0    | 0    | 0    | 0    | 0    | 0    | 0    | 0    |
| Helcococcus sueciensis                       | 0    | 0    | 0    | 0    | 0    | 0    | 0    | 0    | 0    | 0    | 0    | 0    | 0    | 0    | 0    | 0    | 0    | 0    | 0    | 0    | 0    | 0    |
| Lactobacillus casei/rhannosus                | 0    | 0    | 0    | 0    | 0    | 0    | 0    | 0    | 0    | 0    | 0    | 0    | 0    | 0    | 0    | 0    | 0    | 0    | 0    | 0    | 0    | 0    |
| Holdemanella biformis                        | 0    | 0    | 0    | 0    | 0    | 0    | 0    | 0    | 0    | 0    | 0    | 0    | 0    | 0    | 0    | 0    | 0    | 0    | 0    | 0    | 0    | 0    |
| Pelistega                                    | 0    | 0    | 0    | 0    | 0    | 0    | 0    | 0    | 0    | 0    | 0    | 0    | 0    | 0    | 0    | 0    | 0    | 0    | 0    | 0    | 0    | 0    |
| Actinomyces massiliensis                     | 0    | 0    | 0    | 0    | 0    | 0    | 0    | 0    | 0    | 0    | 0    | 0    | 0    | 0    | 0    | 0    | 0    | 0    | 0    | 0    | 0    | 0    |
| Massilia                                     | 0    | 0    | 0    | 0    | 0    | 0    | 0    | 0    | 0    | 0    | 0    | 0    | 0    | 0    | 0    | 0    | 0    | 0    | 0    | 0    | 0    | 0    |
| Staphylococcus equorum/xylosus               | 0    | 0    | 0    | 0    | 0    | 0    | 0    | 0    | 0    | 0    | 27   | 0    | 0    | 0    | 0    | 0    | 0    | 0    | 0    | 0    | 0    | 0    |
| Streptococcus                                | 0    | 0    | 0    | 0    | 0    | 0    | 0    | 0    | 0    | 0    | 0    | 0    | 0    | 26   | 0    | 0    | 0    | 0    | 0    | 0    | 0    | 0    |
| Cutibacterium avidum                         | 0    | 0    | 0    | 0    | 0    | 0    | 0    | 0    | 0    | 0    | 0    | 0    | 0    | 0    | 0    | 0    | 0    | 0    | 0    | 0    | 0    | 0    |

# Samples S200 - S225

| Species                                            | S200  | S201  | S202  | S203 | S205  | S206 | S207  | S208  | S209 | S210  | S211 | S212 | S213  | S215  | S216 | S217 | S218  | S219 | S222  | S223  | S224  | S225  |
|----------------------------------------------------|-------|-------|-------|------|-------|------|-------|-------|------|-------|------|------|-------|-------|------|------|-------|------|-------|-------|-------|-------|
| Streptococcus mitis group                          | 11884 | 15601 | 33772 | 0    | 90    | 315  | 9929  | 15164 | 4852 | 0     | 30   | 7997 | 41    | 1969  | 0    | 34   | 6700  | 661  | 2183  | 49309 | 11501 | 10285 |
| Lactobacillus iners                                | 38    | 0     | 0     | 0    | 53966 | 30   | 0     | 0     | 26   | 61    | 0    | 0    | 49    | 0     | 41   | 0    | 0     | 0    | 0     | 34    | 0     | 0     |
| Gardnerella vaginalis                              | 0     | 0     | 0     | 906  | 14801 | 0    | 63281 | 0     | 4857 | 0     | 0    | 0    | 25134 | 0     | 1797 | 0    | 0     | 0    | 36555 | 0     | 0     | 18406 |
| Corynebacterium pseudogenitalium/tuberculostrictum | 867   | 159   | 3694  | 214  | 8740  | 2607 | 0     | 67    | 120  | 0     | 533  | 945  | 238   | 13397 | 5664 | 265  | 222   | 237  | 418   | 2181  | 73    | 316   |
| Streptococcus agalactiae                           | 0     | 0     | 0     | 0    | 0     | 0    | 0     | 737   | 0    | 33    | 0    | 0    | 0     | 0     | 0    | 0    | 0     | 0    | 3174  | 0     | 0     | 3078  |
| Veillonella montpellierensis                       | 0     | 1699  | 0     | 1941 | 0     | 0    | 0     | 0     | 0    | 0     | 0    | 0    | 0     | 0     | 0    | 0    | 0     | 0    | 0     | 0     | 0     | 0     |
| Streptococcus anginosus                            | 0     | 0     | 0     | 0    | 0     | 0    | 0     | 0     | 0    | 0     | 0    | 0    | 0     | 0     | 0    | 4281 | 0     | 0    | 0     | 0     | 0     | 0     |
| Chlamydia trachomatis                              | 0     | 0     | 0     | 0    | 0     | 0    | 0     | 0     | 0    | 0     | 0    | 0    | 27    | 0     | 0    | 0    | 0     | 0    | 0     | 0     | 0     | 0     |
| Haemophilus parainfluenzae                         | 0     | 0     | 0     | 0    | 0     | 0    | 0     | 0     | 0    | 0     | 0    | 0    | 0     | 0     | 219  | 0    | 0     | 0    | 1368  | 4129  | 0     | 0     |
| Finegoldia magna                                   | 252   | 0     | 373   | 456  | 2678  | 0    | 0     | 0     | 0    | 0     | 2398 | 33   | 0     | 652   | 0    | 797  | 132   | 160  | 0     | 356   | 0     | 0     |
| Peptoniphilus asaccharolyticus/grossensis/harei    | 0     | 0     | 0     | 1777 | 1375  | 0    | 0     | 0     | 0    | 0     | 2632 | 0    | 0     | 0     | 655  | 2983 | 0     | 0    | 0     | 0     | 0     | 0     |
| Sneathia amnii                                     | 0     | 0     | 0     | 2707 | 0     | 0    | 0     | 0     | 0    | 0     | 0    | 0    | 0     | 0     | 0    | 0    | 0     | 0    | 0     | 0     | 0     | 0     |
| Staphylococcus caprae/cohnii/epidermidis           | 87    | 57    | 85    | 0    | 205   | 71   | 0     | 0     | 53   | 0     | 496  | 125  | 0     | 494   | 47   | 0    | 336   | 0    | 0     | 34    | 0     | 62    |
| Gemella haemolysans/taiwanensis                    | 0     | 0     | 0     | 0    | 689   | 0    | 95    | 0     | 0    | 0     | 0    | 0    | 0     | 0     | 27   | 0    | 0     | 0    | 0     | 0     | 0     | 0     |
| Sneathia sanguinogens                              | 0     | 0     | 0     | 1495 | 0     | 0    | 1293  | 0     | 0    | 0     | 0    | 0    | 0     | 0     | 0    | 0    | 0     | 0    | 0     | 0     | 0     | 0     |
| Mycoplasma genitalium                              | 0     | 0     | 0     | 0    | 0     | 0    | 0     | 0     | 0    | 0     | 0    | 105  | 0     | 0     | 4968 | 0    | 0     | 0    | 0     | 0     | 0     | 0     |
| Mycoplasma penetrans                               | 0     | 0     | 0     | 0    | 0     | 0    | 0     | 0     | 0    | 0     | 0    | 0    | 0     | 0     | 0    | 0    | 32692 | 0    | 0     | 0     | 0     | 0     |
| Haemophilus haemolyticus/quentini                  | 0     | 4744  | 0     | 0    | 0     | 0    | 1779  | 0     | 0    | 0     | 0    | 0    | 0     | 0     | 0    | 0    | 0     | 0    | 0     | 0     | 0     | 0     |
| Corynebacterium pyruvicoproductens                 | 657   | 0     | 0     | 0    | 1161  | 0    | 1862  | 0     | 0    | 0     | 45   | 0    | 0     | 0     | 0    | 2550 | 0     | 39   | 0     | 0     | 0     | 0     |
| Anaerococcus prevotii/tetradus                     | 0     | 0     | 0     | 2095 | 188   | 0    | 1042  | 0     | 0    | 0     | 140  | 0    | 0     | 397   | 6182 | 0    | 0     | 0    | 0     | 0     | 0     | 0     |
| Haemophilus influenzae                             | 0     | 0     | 0     | 0    | 0     | 0    | 0     | 0     | 0    | 0     | 5033 | 0    | 0     | 0     | 0    | 0    | 0     | 0    | 0     | 0     | 0     | 0     |
| Staphylococcus epidermidis/hominis                 | 0     | 0     | 116   | 0    | 2478  | 144  | 39    | 0     | 0    | 0     | 44   | 0    | 0     | 4195  | 141  | 0    | 126   | 0    | 0     | 85    | 0     | 0     |
| Atopobium vaginae                                  | 0     | 0     | 0     | 108  | 2467  | 0    | 23521 | 0     | 0    | 0     | 0    | 0    | 919   | 0     | 0    | 0    | 0     | 0    | 0     | 0     | 0     | 0     |
| Ureaplasma parvum/urealyticum                      | 0     | 0     | 0     | 35   | 0     | 0    | 2250  | 0     | 0    | 0     | 71   | 44   | 0     | 0     | 0    | 264  | 0     | 0    | 0     | 0     | 2711  | 0     |
| Prevotella timonensis                              | 0     | 0     | 0     | 2775 | 0     | 0    | 0     | 0     | 0    | 0     | 0    | 0    | 0     | 0     | 594  | 0    | 0     | 0    | 0     | 0     | 0     | 0     |
| Fenollaria massiliensis/timonensis                 | 0     | 0     | 0     | 0    | 42    | 0    | 0     | 0     | 0    | 0     | 0    | 0    | 0     | 0     | 0    | 0    | 0     | 56   | 0     | 0     | 0     | 0     |
| Anaerococcus                                       | 0     | 0     | 0     | 63   | 312   | 0    | 0     | 0     | 0    | 0     | 911  | 0    | 0     | 1598  | 0    | 0    | 0     | 0    | 0     | 0     | 0     | 0     |
| Corynebacterium coyleae                            | 0     | 0     | 0     | 0    | 769   | 0    | 99    | 0     | 0    | 0     | 0    | 0    | 0     | 224   | 0    | 0    | 0     | 90   | 0     | 0     | 29    | 0     |
| Prevotella bivia                                   | 317   | 0     | 0     | 0    | 0     | 0    | 0     | 0     | 0    | 0     | 0    | 0    | 0     | 0     | 0    | 4872 | 0     | 0    | 0     | 0     | 0     | 6116  |
| Prevotella melaninogenica                          | 0     | 0     | 0     | 1227 | 0     | 0    | 0     | 0     | 0    | 0     | 0    | 0    | 0     | 0     | 4970 | 25   | 0     | 0    | 0     | 0     | 0     | 0     |
| Corynebacterium aurimucosum/minusimum/singulare    | 241   | 0     | 0     | 28   | 9918  | 2548 | 0     | 0     | 0    | 0     | 143  | 0    | 0     | 959   | 913  | 0    | 0     | 1394 | 0     | 403   | 0     | 41    |
| Staphylococcus aureus                              | 0     | 0     | 0     | 0    | 0     | 0    | 0     | 0     | 0    | 0     | 0    | 0    | 0     | 0     | 0    | 0    | 0     | 0    | 0     | 0     | 0     | 0     |
| Anaerococcus lactolyticus                          | 0     | 0     | 0     | 2499 | 0     | 0    | 0     | 0     | 0    | 0     | 0    | 0    | 0     | 0     | 0    | 0    | 0     | 0    | 0     | 0     | 0     | 0     |
| Aerococcus christensenii                           | 0     | 0     | 0     | 0    | 0     | 0    | 0     | 0     | 0    | 0     | 0    | 0    | 0     | 0     | 0    | 0    | 0     | 0    | 0     | 0     | 0     | 0     |
| Corynebacterium glucuronolyticum                   | 0     | 0     | 0     | 0    | 356   | 0    | 653   | 0     | 0    | 0     | 0    | 0    | 0     | 707   | 0    | 0    | 0     | 0    | 541   | 0     | 0     | 0     |
| Veillonella atypica                                | 2212  | 0     | 0     | 0    | 0     | 0    | 49    | 0     | 69   | 0     | 0    | 0    | 0     | 0     | 0    | 3292 | 0     | 0    | 172   | 0     | 0     | 0     |
| Veillonella                                        | 0     | 0     | 0     | 0    | 0     | 0    | 0     | 0     | 0    | 0     | 0    | 0    | 0     | 0     | 0    | 0    | 0     | 0    | 0     | 104   | 0     | 0     |
| Mycoplasma hominis                                 | 0     | 0     | 0     | 0    | 0     | 0    | 0     | 0     | 0    | 0     | 0    | 0    | 0     | 0     | 0    | 0    | 0     | 0    | 0     | 0     | 4346  | 0     |
| Granulicatella elegans                             | 0     | 0     | 0     | 184  | 0     | 0    | 0     | 0     | 0    | 0     | 0    | 0    | 0     | 0     | 2890 | 0    | 0     | 0    | 0     | 0     | 0     | 320   |
| Ezakiella                                          | 0     | 0     | 0     | 0    | 0     | 0    | 0     | 0     | 0    | 0     | 0    | 0    | 0     | 0     | 0    | 0    | 0     | 0    | 0     | 0     | 0     | 0     |
| Shigella/Escherichia                               | 0     | 0     | 0     | 0    | 0     | 0    | 0     | 0     | 0    | 46677 | 0    | 0    | 0     | 0     | 0    | 0    | 0     | 0    | 0     | 0     | 0     | 0     |
| Streptococcus salivarius                           | 0     | 0     | 0     | 0    | 0     | 0    | 0     | 0     | 0    | 0     | 0    | 0    | 0     | 0     | 0    | 0    | 0     | 0    | 0     | 0     | 0     | 0     |
| Actinomyces turicensis                             | 0     | 0     | 0     | 193  | 0     | 0    | 0     | 0     | 0    | 0     | 0    | 0    | 0     | 0     | 0    | 0    | 0     | 0    | 0     | 0     | 0     | 0     |
| Prevotella corporis                                | 0     | 0     | 0     | 0    | 0     | 0    | 0     | 0     | 0    | 0     | 0    | 0    | 0     | 0     | 0    | 0    | 0     | 0    | 0     | 0     | 0     | 0     |
| Corynebacterium simulans                           | 0     | 0     | 1351  | 0    | 316   | 0    | 0     | 0     | 0    | 0     | 64   | 0    | 0     | 0     | 0    | 0    | 0     | 0    | 0     | 0     | 0     | 0     |
| Fusobacterium equinum                              | 0     | 0     | 0     | 0    | 0     | 0    | 0     | 0     | 0    | 0     | 0    | 0    | 0     | 0     | 0    | 0    | 0     | 0    | 0     | 0     | 0     | 0     |
| Corynebacterium                                    | 0     | 0     | 0     | 0    | 644   | 0    | 0     | 0     | 0    | 0     | 0    | 0    | 0     | 47    | 0    | 0    | 0     | 85   | 0     | 57    | 0     | 0     |
| Staphylococcus haemolyticus                        | 101   | 0     | 685   | 0    | 351   | 0    | 0     | 216   | 0    | 0     | 0    | 0    | 0     | 119   | 62   | 35   | 77    | 0    | 296   | 25    | 0     | 111   |
| Gemella asaccharolytica                            | 0     | 0     | 0     | 118  | 0     | 0    | 3066  | 0     | 0    | 0     | 0    | 0    | 139   | 0     | 0    | 0    | 0     | 0    | 0     | 0     | 3866  | 0     |
| Peptoniphilus                                      | 0     | 0     | 0     | 628  | 0     | 0    | 0     | 0     | 0    | 0     | 0    | 0    | 0     | 60    | 381  | 0    | 0     | 0    | 0     | 0     | 0     | 0     |
| Corynebacterium hadale/imitans                     | 0     | 0     | 0     | 0    | 1519  | 141  | 0     | 0     | 0    | 0     | 0    | 0    | 0     | 531   | 293  | 0    | 0     | 121  | 0     | 200   | 0     | 0     |
| Eggerthella sp. type 1 (species)                   | 0     | 0     | 0     | 206  | 1104  | 0    | 89    | 0     | 0    | 0     | 0    | 0    | 52    | 0     | 0    | 0    | 0     | 0    | 0     | 0     | 0     | 0     |
| Prevotella disiens                                 | 0     | 0     | 0     | 0    | 0     | 0    | 0     | 0     | 0    | 0     | 0    | 0    | 0     | 0     | 0    | 0    | 0     | 0    | 0     | 0     | 0     | 0     |
| Peptoniphilus lacrimalis                           | 0     | 0     | 0     | 0    | 0     | 0    | 0     | 0     | 0    | 0     | 0    | 0    | 0     | 0     | 0    | 0    | 0     | 0    | 0     | 0     | 0     | 0     |
| Anaerococcus vaginalis                             | 0     | 0     | 0     | 0    | 0     | 0    | 0     | 0     | 0    | 0     | 0    | 0    | 0     | 0     | 192  | 0    | 0     | 0    | 0     | 45    | 0     | 0     |
| Facklamia hominis                                  | 0     | 0     | 0     | 81   | 48    | 0    | 0     | 0     | 0    | 0     | 497  | 0    | 0     | 0     | 0    | 0    | 0     | 0    | 0     | 0     | 0     | 0     |
| Prevotella amnii                                   | 0     | 0     | 0     | 1289 | 0     | 0    | 0     | 0     | 0    | 0     | 0    | 1863 | 0     | 0     | 0    | 0    | 0     | 0    | 0     | 0     | 0     | 0     |
| Campylobacter ureolyticus                          | 0     | 0     | 0     | 741  | 0     | 0    | 0     | 0     | 0    | 0     | 0    | 0    | 0     | 0     | 196  | 0    | 0     | 0    | 0     | 0     | 0     | 0     |
| BVAB2 (species)                                    | 0     | 0     | 0     | 546  | 0     | 0    | 0     | 0     | 0    | 0     | 0    | 0    | 0     | 0     | 0    | 0    | 0     | 0    | 0     | 0     | 0     | 0     |
| Haemophilus                                        | 0     | 0     | 0     | 0    | 0     | 0    | 0     | 0     | 0    | 0     | 0    | 0    | 0     | 0     | 0    | 0    | 0     | 0    | 0     | 0     | 0     | 0     |
| Anaerococcus hydrogenalis/rubeifantus              | 0     | 0     | 0     | 0    | 1267  | 0    | 0     | 0     | 0    | 0     | 5334 | 0    | 0     | 0     | 0    | 0    | 0     | 0    | 0     | 0     | 0     | 0     |
| Anaerococcus mediterraneensis                      | 0     | 0     | 0     | 150  | 0     | 0    | 0     | 0     | 0    | 0     | 900  | 0    | 0     | 0     | 0    | 0    | 0     | 0    | 0     | 0     | 0     | 0     |
| Dialister sp. type 2                               | 0     | 0     | 0     | 300  | 0     | 0    | 0     | 0     | 0    | 0     | 0    | 0    | 0     | 0     | 0    | 0    | 0     | 0    | 0     | 0     | 0     | 0     |
| Dialister microaerophilus                          | 0     | 0     | 0     | 77   | 0     | 0    | 0     | 0     | 0    | 0     | 0    | 0    | 0     | 0     | 0    | 0    | 0     | 0    | 0     | 0     | 0     | 0     |
| Corynebacterium amycolatum                         | 0     | 0     | 0     | 0    | 615   | 0    | 0     | 0     | 0    | 0     | 0    | 0    | 0     | 0     | 0    | 0    | 37    | 0    | 0     | 0     | 0     | 0     |
| Ureaplasma                                         | 0     | 0     | 0     | 0    | 0     | 0    | 0     | 0     | 0    | 0     | 0    | 0    | 0     | 0     | 0    | 0    | 0     | 0    | 0     | 0     | 2293  | 0     |
| Enterococcus faecalis                              | 0     | 64    | 0     | 0    | 0     | 0    |       |       |      |       |      |      |       |       |      |      |       |      |       |       |       |       |

Samples S200 - S225

| Species                                                | S200 | S201 | S202 | S203 | S205 | S206 | S207 | S208 | S209 | S210  | S211 | S212 | S213 | S215 | S216 | S217 | S218 | S219 | S222 | S223 | S224 | S225 |
|--------------------------------------------------------|------|------|------|------|------|------|------|------|------|-------|------|------|------|------|------|------|------|------|------|------|------|------|
| Peptoniphilus rhinitidis                               | 0    | 0    | 0    | 0    | 0    | 0    | 0    | 0    | 0    | 0     | 0    | 0    | 0    | 125  | 0    | 0    | 0    | 153  | 0    | 50   | 0    | 0    |
| Anaerococcus senegalensis                              | 30   | 0    | 141  | 0    | 74   | 0    | 0    | 0    | 0    | 0     | 0    | 0    | 0    | 196  | 0    | 0    | 0    | 0    | 0    | 0    | 0    | 0    |
| Peptostreptococcus anaerobius                          | 0    | 0    | 0    | 0    | 0    | 0    | 0    | 0    | 0    | 0     | 0    | 0    | 0    | 0    | 0    | 0    | 0    | 0    | 0    | 0    | 0    | 0    |
| Dialister propionificiens                              | 0    | 0    | 0    | 0    | 0    | 0    | 0    | 0    | 0    | 0     | 0    | 0    | 0    | 0    | 0    | 0    | 0    | 0    | 0    | 0    | 0    | 0    |
| Peptoniphilus harei                                    | 0    | 0    | 0    | 0    | 0    | 0    | 0    | 0    | 0    | 0     | 0    | 0    | 0    | 102  | 0    | 0    | 0    | 108  | 0    | 0    | 0    | 0    |
| Negativicoccus succinivorans                           | 0    | 0    | 0    | 130  | 0    | 0    | 0    | 0    | 0    | 0     | 0    | 0    | 0    | 0    | 0    | 0    | 0    | 0    | 0    | 0    | 0    | 0    |
| Parvimonas micra                                       | 0    | 0    | 0    | 226  | 0    | 0    | 0    | 0    | 0    | 0     | 0    | 0    | 0    | 0    | 0    | 0    | 0    | 0    | 0    | 0    | 0    | 0    |
| Actinomyces ihumii                                     | 0    | 0    | 0    | 0    | 30   | 0    | 0    | 0    | 0    | 0     | 0    | 0    | 0    | 0    | 0    | 0    | 0    | 0    | 0    | 0    | 0    | 0    |
| Actinotignum timonense                                 | 0    | 0    | 0    | 0    | 0    | 0    | 0    | 0    | 0    | 0     | 0    | 0    | 0    | 0    | 0    | 0    | 0    | 0    | 0    | 0    | 0    | 0    |
| Fenollaria                                             | 0    | 0    | 0    | 0    | 0    | 0    | 0    | 0    | 0    | 0     | 0    | 0    | 0    | 0    | 0    | 0    | 0    | 0    | 0    | 0    | 0    | 0    |
| Fusobacterium massiliense                              | 0    | 0    | 0    | 0    | 0    | 0    | 0    | 0    | 0    | 0     | 0    | 0    | 0    | 0    | 0    | 0    | 0    | 0    | 0    | 0    | 0    | 0    |
| Actinobaculum massiliense                              | 0    | 0    | 0    | 0    | 0    | 0    | 0    | 0    | 0    | 0     | 3912 | 0    | 0    | 0    | 0    | 0    | 0    | 0    | 0    | 0    | 0    | 0    |
| Peptoniphilus coxii                                    | 0    | 0    | 0    | 191  | 115  | 0    | 0    | 0    | 0    | 0     | 62   | 0    | 0    | 0    | 0    | 0    | 0    | 0    | 0    | 0    | 0    | 0    |
| Staphylococcus lugdunensis                             | 55   | 0    | 0    | 0    | 0    | 0    | 0    | 0    | 0    | 0     | 0    | 0    | 0    | 0    | 0    | 0    | 0    | 0    | 0    | 0    | 0    | 0    |
| Dermabacter                                            | 28   | 0    | 0    | 0    | 686  | 68   | 0    | 0    | 0    | 0     | 0    | 0    | 0    | 0    | 35   | 0    | 0    | 98   | 0    | 59   | 0    | 0    |
| Alloscardovia omnicolens                               | 0    | 0    | 0    | 0    | 0    | 0    | 0    | 0    | 0    | 0     | 0    | 0    | 0    | 0    | 0    | 2088 | 0    | 0    | 83   | 0    | 0    | 0    |
| Varibaculum cambriense                                 | 0    | 0    | 0    | 202  | 0    | 0    | 0    | 0    | 0    | 0     | 74   | 0    | 0    | 0    | 0    | 0    | 0    | 0    | 0    | 0    | 0    | 0    |
| Streptococcus urinialis                                | 0    | 0    | 125  | 0    | 0    | 0    | 0    | 0    | 0    | 0     | 0    | 0    | 0    | 0    | 0    | 65   | 0    | 0    | 0    | 0    | 0    | 0    |
| Corynebacterium appendicis                             | 0    | 0    | 0    | 0    | 512  | 0    | 0    | 0    | 0    | 0     | 0    | 0    | 0    | 0    | 0    | 0    | 0    | 546  | 0    | 0    | 0    | 0    |
| Actinotignum schaalii                                  | 0    | 0    | 0    | 0    | 0    | 0    | 0    | 0    | 0    | 0     | 0    | 0    | 0    | 0    | 0    | 0    | 0    | 0    | 0    | 0    | 0    | 0    |
| Corynebacterium timonense                              | 0    | 0    | 0    | 0    | 0    | 0    | 0    | 0    | 0    | 0     | 4873 | 0    | 0    | 0    | 0    | 0    | 0    | 0    | 0    | 0    | 0    | 0    |
| Gemella                                                | 0    | 0    | 0    | 0    | 0    | 0    | 0    | 0    | 0    | 0     | 0    | 0    | 0    | 0    | 0    | 0    | 0    | 0    | 0    | 0    | 0    | 0    |
| Klebsiella aerogenes/Enterobacter asburiae             | 0    | 0    | 0    | 0    | 0    | 0    | 0    | 0    | 0    | 0     | 0    | 0    | 0    | 0    | 0    | 0    | 0    | 0    | 0    | 0    | 0    | 0    |
| Fusobacterium periodonticum                            | 0    | 0    | 0    | 0    | 0    | 0    | 0    | 0    | 0    | 0     | 0    | 0    | 0    | 0    | 0    | 0    | 0    | 0    | 0    | 0    | 0    | 0    |
| Veillonella dispar                                     | 0    | 0    | 0    | 0    | 0    | 0    | 0    | 0    | 0    | 0     | 0    | 0    | 0    | 0    | 0    | 0    | 0    | 0    | 0    | 0    | 0    | 0    |
| Prevotella colorans                                    | 0    | 0    | 0    | 29   | 0    | 0    | 0    | 0    | 0    | 0     | 0    | 0    | 0    | 0    | 0    | 0    | 0    | 0    | 0    | 0    | 0    | 0    |
| Candidatus Peptoniphilus massiliensis                  | 0    | 0    | 0    | 0    | 0    | 0    | 0    | 0    | 0    | 0     | 0    | 0    | 0    | 0    | 0    | 0    | 0    | 0    | 0    | 0    | 0    | 0    |
| Eremococcus                                            | 0    | 0    | 0    | 0    | 324  | 0    | 0    | 0    | 0    | 0     | 0    | 0    | 0    | 125  | 0    | 0    | 0    | 0    | 0    | 103  | 0    | 0    |
| Varibaculum anthropi                                   | 0    | 0    | 0    | 70   | 0    | 0    | 0    | 0    | 0    | 0     | 70   | 0    | 0    | 0    | 0    | 0    | 0    | 0    | 0    | 0    | 0    | 0    |
| Propionimicrobium lymphophilum                         | 0    | 0    | 0    | 0    | 0    | 0    | 0    | 0    | 0    | 0     | 34   | 0    | 0    | 0    | 0    | 0    | 0    | 0    | 0    | 0    | 0    | 0    |
| Streptococcus dysgalactiae                             | 0    | 0    | 0    | 0    | 0    | 0    | 0    | 0    | 0    | 0     | 0    | 0    | 0    | 0    | 0    | 0    | 0    | 0    | 0    | 0    | 0    | 0    |
| Negativicoccus                                         | 0    | 0    | 0    | 456  | 0    | 0    | 0    | 0    | 0    | 0     | 0    | 0    | 0    | 0    | 61   | 0    | 0    | 0    | 0    | 0    | 0    | 0    |
| Porphyromonas somerae                                  | 0    | 0    | 0    | 0    | 0    | 0    | 0    | 0    | 0    | 0     | 0    | 0    | 0    | 0    | 0    | 0    | 0    | 0    | 0    | 0    | 0    | 0    |
| Corynebacterium jeikeium                               | 0    | 0    | 0    | 0    | 3614 | 0    | 0    | 0    | 0    | 0     | 93   | 0    | 0    | 74   | 0    | 0    | 0    | 181  | 0    | 0    | 0    | 0    |
| Mobiluncus curtisii                                    | 0    | 0    | 0    | 0    | 0    | 0    | 0    | 0    | 0    | 0     | 0    | 0    | 0    | 0    | 0    | 0    | 0    | 0    | 0    | 0    | 0    | 0    |
| Porphyromonas uenonis                                  | 0    | 0    | 0    | 292  | 0    | 0    | 0    | 0    | 0    | 0     | 292  | 0    | 0    | 0    | 0    | 0    | 0    | 0    | 0    | 0    | 0    | 0    |
| Aerococcus urinae                                      | 0    | 0    | 0    | 79   | 0    | 0    | 0    | 0    | 0    | 0     | 0    | 0    | 0    | 0    | 0    | 0    | 0    | 0    | 0    | 0    | 0    | 0    |
| Corynebacterium mycetoides                             | 0    | 0    | 0    | 25   | 0    | 0    | 0    | 0    | 0    | 0     | 0    | 0    | 0    | 0    | 0    | 0    | 0    | 0    | 0    | 0    | 0    | 0    |
| Cutibacterium acnes                                    | 0    | 0    | 0    | 0    | 0    | 0    | 0    | 0    | 0    | 0     | 0    | 0    | 0    | 0    | 0    | 0    | 0    | 0    | 0    | 0    | 0    | 0    |
| Urinacoccus massiliensis                               | 0    | 0    | 0    | 184  | 165  | 0    | 0    | 0    | 0    | 0     | 0    | 0    | 0    | 0    | 0    | 0    | 0    | 0    | 0    | 0    | 0    | 0    |
| Campylobacter hominis                                  | 0    | 0    | 0    | 0    | 0    | 0    | 0    | 0    | 0    | 0     | 0    | 0    | 0    | 0    | 0    | 0    | 0    | 0    | 0    | 0    | 0    | 0    |
| Staphylococcus capitis/caprae                          | 0    | 39   | 0    | 0    | 0    | 0    | 0    | 0    | 0    | 0     | 0    | 41   | 0    | 0    | 0    | 0    | 0    | 0    | 0    | 34   | 0    | 0    |
| Sneathia                                               | 0    | 0    | 0    | 0    | 0    | 0    | 0    | 0    | 0    | 0     | 0    | 0    | 0    | 0    | 0    | 0    | 0    | 0    | 0    | 0    | 0    | 0    |
| Prevotella jejuni                                      | 0    | 0    | 0    | 0    | 0    | 0    | 0    | 0    | 0    | 0     | 0    | 0    | 0    | 0    | 0    | 101  | 0    | 0    | 0    | 0    | 0    | 0    |
| Varibaculum                                            | 0    | 0    | 0    | 0    | 0    | 0    | 0    | 0    | 0    | 0     | 0    | 0    | 0    | 0    | 0    | 0    | 0    | 0    | 0    | 0    | 0    | 0    |
| Corynebacterium striatum                               | 0    | 0    | 0    | 0    | 0    | 0    | 0    | 0    | 0    | 0     | 0    | 0    | 0    | 0    | 0    | 0    | 0    | 0    | 0    | 0    | 0    | 0    |
| Jonquetella anthropi                                   | 0    | 0    | 0    | 0    | 0    | 0    | 0    | 0    | 0    | 0     | 0    | 0    | 0    | 0    | 0    | 0    | 0    | 0    | 0    | 0    | 0    | 0    |
| Peptoniphilus koenoeniae                               | 0    | 0    | 0    | 0    | 0    | 0    | 0    | 0    | 0    | 0     | 0    | 0    | 0    | 0    | 0    | 0    | 0    | 0    | 0    | 0    | 0    | 0    |
| Bifidobacterium longum                                 | 0    | 0    | 0    | 0    | 0    | 0    | 0    | 0    | 0    | 0     | 0    | 0    | 0    | 0    | 0    | 1213 | 0    | 0    | 0    | 0    | 0    | 0    |
| Helicobacter                                           | 0    | 0    | 0    | 0    | 0    | 0    | 0    | 0    | 0    | 0     | 0    | 0    | 0    | 0    | 0    | 0    | 0    | 0    | 0    | 0    | 0    | 0    |
| Lawsonella clevelandensis                              | 0    | 0    | 0    | 0    | 0    | 0    | 0    | 0    | 0    | 0     | 0    | 0    | 0    | 0    | 0    | 0    | 0    | 0    | 0    | 0    | 0    | 0    |
| Escherichia coli/fergusonii                            | 0    | 0    | 0    | 0    | 0    | 0    | 0    | 0    | 0    | 16060 | 0    | 0    | 0    | 0    | 0    | 0    | 0    | 0    | 0    | 0    | 0    | 0    |
| Fusobacterium nucleatum                                | 0    | 500  | 0    | 0    | 0    | 0    | 41   | 0    | 0    | 0     | 0    | 0    | 0    | 0    | 0    | 0    | 0    | 0    | 0    | 0    | 0    | 0    |
| Porphyromonas asaccharolytica                          | 0    | 0    | 0    | 0    | 0    | 0    | 0    | 0    | 0    | 0     | 0    | 0    | 0    | 0    | 0    | 0    | 0    | 0    | 0    | 0    | 0    | 0    |
| Anaerococcus octavius                                  | 112  | 0    | 0    | 0    | 89   | 0    | 0    | 0    | 0    | 0     | 0    | 0    | 0    | 0    | 0    | 0    | 0    | 0    | 0    | 36   | 0    | 0    |
| Fusobacterium                                          | 0    | 0    | 0    | 0    | 0    | 0    | 0    | 0    | 0    | 0     | 0    | 0    | 0    | 0    | 0    | 0    | 0    | 0    | 0    | 0    | 0    | 0    |
| Corynebacterium phoceense                              | 0    | 0    | 0    | 0    | 0    | 0    | 0    | 0    | 0    | 0     | 0    | 0    | 0    | 0    | 0    | 0    | 0    | 0    | 0    | 0    | 0    | 0    |
| Ruminococcus                                           | 0    | 0    | 0    | 0    | 0    | 0    | 0    | 0    | 0    | 0     | 0    | 0    | 0    | 0    | 0    | 0    | 0    | 0    | 0    | 0    | 0    | 0    |
| Arcanobacterium                                        | 0    | 0    | 0    | 0    | 0    | 0    | 0    | 0    | 0    | 0     | 0    | 0    | 0    | 0    | 0    | 0    | 0    | 0    | 0    | 0    | 0    | 0    |
| Khoudiadiopia                                          | 0    | 0    | 0    | 0    | 0    | 0    | 0    | 0    | 0    | 0     | 0    | 0    | 0    | 0    | 0    | 0    | 0    | 0    | 0    | 0    | 0    | 0    |
| Atopobium deltae                                       | 0    | 0    | 0    | 0    | 0    | 0    | 0    | 0    | 0    | 0     | 0    | 0    | 0    | 0    | 0    | 0    | 0    | 0    | 0    | 0    | 0    | 0    |
| Haemophilus paraaerolyticus                            | 0    | 0    | 0    | 0    | 0    | 0    | 0    | 0    | 0    | 0     | 0    | 0    | 0    | 0    | 0    | 0    | 0    | 0    | 0    | 0    | 0    | 0    |
| Howardella                                             | 0    | 0    | 0    | 40   | 0    | 0    | 0    | 0    | 0    | 0     | 0    | 0    | 0    | 0    | 122  | 0    | 0    | 0    | 0    | 0    | 0    | 0    |
| Prevotella buccalis                                    | 0    | 0    | 0    | 348  | 0    | 0    | 0    | 0    | 0    | 0     | 0    | 0    | 0    | 0    | 0    | 0    | 0    | 33   | 0    | 0    | 0    | 0    |
| Corynebacterium auris                                  | 0    | 0    | 0    | 0    | 0    | 0    | 0    | 0    | 0    | 0     | 2020 | 0    | 0    | 0    | 0    | 0    | 0    | 0    | 0    | 0    | 0    | 0    |
| Candidatus Mycoplasma gireddii                         | 0    | 0    | 0    | 0    | 0    | 0    | 0    | 0    | 0    | 0     | 0    | 0    | 0    | 0    | 0    | 0    | 0    | 0    | 0    | 0    | 0    | 0    |
| Alloicoccus                                            | 0    | 0    | 0    | 0    | 0    | 0    | 0    | 0    | 0    | 0     | 0    | 0    | 0    | 0    | 0    | 0    | 0    | 0    | 0    | 0    | 0    | 0    |
| Corynebacterium founierii/mucifaciens/ureicelerivorans | 0    | 0    | 0    | 0    | 223  | 0    | 0    | 0    | 0    | 0     | 0    | 0    | 0    | 66   | 0    | 0    | 0    | 0    | 0    | 0    | 0    | 0    |
| Corynebacterium auris/timonense                        | 0    | 0    | 0    | 0    | 0    | 0    | 0    | 0    | 0    | 0     | 0    | 0    | 0    | 0    | 0    | 0    | 0    | 0    | 0    | 0    | 0    | 0    |
| Veillonella ratti/seminalis                            | 0    | 0    | 0    | 0    | 0    | 0    | 0    | 0    | 0    | 0     | 0    | 0    | 0    | 0    | 0    | 0    | 0    | 0    | 0    | 0    | 0    | 0    |

Samples S200 - S225

| Species                                    | S200 | S201 | S202 | S203 | S205 | S206 | S207 | S208 | S209 | S210 | S211 | S212 | S213 | S215 | S216 | S217 | S218 | S219 | S222 | S223 | S224 | S225 |
|--------------------------------------------|------|------|------|------|------|------|------|------|------|------|------|------|------|------|------|------|------|------|------|------|------|------|
| Lactobacillus gasserii                     | 0    | 0    | 0    | 0    | 0    | 0    | 0    | 0    | 0    | 0    | 0    | 0    | 0    | 0    | 0    | 0    | 0    | 0    | 0    | 0    | 0    | 0    |
| Tissierella                                | 0    | 0    | 0    | 0    | 0    | 0    | 0    | 0    | 0    | 0    | 0    | 0    | 0    | 0    | 0    | 0    | 0    | 0    | 0    | 0    | 0    | 0    |
| Granulicatella adiacens                    | 0    | 0    | 0    | 0    | 0    | 0    | 0    | 0    | 0    | 0    | 0    | 0    | 0    | 0    | 0    | 0    | 0    | 0    | 0    | 0    | 0    | 0    |
| Sutterella                                 | 0    | 0    | 0    | 0    | 0    | 0    | 0    | 0    | 0    | 0    | 0    | 0    | 0    | 0    | 0    | 0    | 0    | 0    | 0    | 0    | 0    | 0    |
| Prevotella nanceiensis                     | 0    | 0    | 0    | 0    | 0    | 0    | 0    | 0    | 0    | 0    | 0    | 0    | 0    | 0    | 0    | 0    | 0    | 0    | 0    | 0    | 0    | 0    |
| Lactobacillus jensenii                     | 0    | 0    | 0    | 0    | 145  | 0    | 0    | 0    | 0    | 0    | 0    | 0    | 0    | 0    | 0    | 0    | 0    | 0    | 0    | 0    | 0    | 0    |
| Lactobacillus crispatus                    | 0    | 0    | 0    | 0    | 161  | 0    | 0    | 0    | 0    | 0    | 0    | 0    | 0    | 0    | 0    | 0    | 0    | 0    | 0    | 0    | 0    | 0    |
| Candidate Division TM7 vaginal (genus)     | 0    | 0    | 0    | 0    | 0    | 0    | 0    | 0    | 0    | 0    | 0    | 0    | 0    | 0    | 0    | 0    | 0    | 0    | 0    | 0    | 0    | 0    |
| Candidatus Saccharimonas                   | 0    | 0    | 0    | 0    | 0    | 0    | 0    | 0    | 50   | 0    | 0    | 0    | 0    | 0    | 0    | 0    | 0    | 0    | 0    | 0    | 0    | 0    |
| Peptococcus niger                          | 0    | 0    | 0    | 0    | 0    | 0    | 0    | 0    | 0    | 0    | 0    | 0    | 0    | 0    | 0    | 0    | 0    | 0    | 0    | 0    | 0    | 0    |
| Neisseria flavescens/perflava              | 0    | 0    | 0    | 0    | 0    | 0    | 0    | 0    | 0    | 0    | 0    | 0    | 0    | 0    | 0    | 0    | 0    | 0    | 0    | 0    | 0    | 0    |
| Gemella sanguinis                          | 0    | 0    | 0    | 0    | 0    | 0    | 0    | 0    | 0    | 0    | 0    | 0    | 0    | 0    | 0    | 0    | 0    | 0    | 0    | 0    | 0    | 0    |
| Porphyromonas                              | 0    | 0    | 0    | 0    | 0    | 0    | 0    | 0    | 0    | 0    | 0    | 0    | 0    | 0    | 0    | 0    | 0    | 0    | 0    | 150  | 0    | 0    |
| Prevotella                                 | 0    | 0    | 0    | 0    | 0    | 0    | 50   | 0    | 0    | 0    | 0    | 0    | 0    | 0    | 0    | 0    | 0    | 0    | 0    | 0    | 0    | 0    |
| Corynebacterium thomssenii                 | 0    | 0    | 0    | 0    | 0    | 0    | 0    | 0    | 0    | 0    | 0    | 0    | 0    | 0    | 0    | 0    | 0    | 0    | 0    | 0    | 0    | 0    |
| Lachnospiraceae                            | 0    | 0    | 0    | 0    | 0    | 0    | 0    | 0    | 0    | 0    | 0    | 0    | 0    | 0    | 0    | 0    | 0    | 0    | 0    | 0    | 0    | 0    |
| Corynebacterium tuberculoostearicum        | 0    | 0    | 0    | 0    | 0    | 0    | 0    | 0    | 0    | 0    | 0    | 0    | 0    | 0    | 0    | 0    | 0    | 0    | 0    | 0    | 0    | 0    |
| Dermabacter hominis                        | 0    | 0    | 0    | 0    | 168  | 0    | 0    | 0    | 0    | 0    | 0    | 0    | 0    | 0    | 0    | 0    | 0    | 0    | 0    | 0    | 0    | 0    |
| Veillonella rogosae                        | 0    | 0    | 0    | 0    | 0    | 0    | 0    | 0    | 0    | 0    | 0    | 0    | 0    | 0    | 0    | 0    | 0    | 0    | 0    | 0    | 0    | 0    |
| Actinomyces hongkongensis                  | 0    | 0    | 0    | 0    | 0    | 0    | 0    | 0    | 0    | 0    | 0    | 0    | 0    | 0    | 0    | 0    | 0    | 0    | 0    | 0    | 0    | 0    |
| Veillonella parvula/rogosae                | 0    | 0    | 0    | 0    | 0    | 0    | 0    | 0    | 0    | 0    | 0    | 0    | 0    | 0    | 0    | 0    | 0    | 0    | 0    | 0    | 0    | 0    |
| Anaerococcus provencensis                  | 36   | 0    | 0    | 0    | 81   | 0    | 0    | 0    | 0    | 0    | 0    | 0    | 0    | 36   | 0    | 0    | 0    | 0    | 0    | 0    | 0    | 0    |
| Porphyromonas sp. type 1                   | 0    | 0    | 0    | 0    | 0    | 0    | 0    | 0    | 0    | 0    | 0    | 0    | 0    | 0    | 0    | 0    | 0    | 0    | 0    | 0    | 0    | 0    |
| Brevibacterium paucivorans                 | 0    | 0    | 0    | 0    | 591  | 0    | 0    | 0    | 0    | 0    | 0    | 0    | 0    | 0    | 0    | 0    | 0    | 105  | 0    | 0    | 0    | 0    |
| Peptostreptococcus                         | 0    | 0    | 0    | 0    | 0    | 0    | 0    | 0    | 0    | 0    | 0    | 0    | 0    | 0    | 0    | 0    | 0    | 0    | 0    | 0    | 0    | 0    |
| Facklamia languida                         | 0    | 0    | 0    | 0    | 244  | 0    | 0    | 0    | 0    | 0    | 0    | 0    | 0    | 165  | 0    | 0    | 0    | 55   | 0    | 0    | 0    | 0    |
| Streptobacillus                            | 0    | 0    | 0    | 0    | 0    | 0    | 0    | 0    | 0    | 0    | 0    | 0    | 0    | 0    | 0    | 0    | 0    | 0    | 0    | 0    | 0    | 0    |
| Gemella haemolysans                        | 0    | 0    | 0    | 0    | 0    | 0    | 0    | 0    | 0    | 0    | 0    | 0    | 0    | 0    | 0    | 0    | 0    | 0    | 0    | 0    | 0    | 0    |
| Haemophilus sputorum                       | 0    | 0    | 0    | 0    | 0    | 0    | 0    | 0    | 0    | 0    | 0    | 0    | 0    | 0    | 0    | 0    | 0    | 0    | 0    | 0    | 0    | 0    |
| Actinotignum urinale                       | 0    | 0    | 0    | 0    | 0    | 0    | 0    | 0    | 0    | 0    | 0    | 0    | 0    | 0    | 0    | 0    | 0    | 0    | 0    | 0    | 0    | 0    |
| Dialister pneumosintes                     | 0    | 0    | 0    | 0    | 0    | 0    | 0    | 0    | 0    | 0    | 0    | 0    | 0    | 0    | 0    | 0    | 0    | 0    | 0    | 0    | 0    | 0    |
| Treponema pallidum                         | 0    | 0    | 0    | 0    | 0    | 0    | 0    | 0    | 0    | 0    | 0    | 0    | 0    | 0    | 0    | 0    | 0    | 0    | 0    | 0    | 0    | 0    |
| Porphyromonas bennonis                     | 0    | 0    | 0    | 0    | 0    | 0    | 0    | 0    | 0    | 0    | 0    | 0    | 0    | 0    | 0    | 0    | 0    | 0    | 0    | 0    | 0    | 0    |
| Bergeyella                                 | 0    | 0    | 0    | 0    | 0    | 0    | 0    | 0    | 0    | 0    | 0    | 0    | 0    | 0    | 0    | 0    | 0    | 0    | 0    | 0    | 0    | 128  |
| Actinotignum schaalii/timonense            | 0    | 0    | 0    | 211  | 0    | 0    | 0    | 0    | 0    | 0    | 0    | 0    | 0    | 0    | 0    | 0    | 0    | 0    | 0    | 0    | 0    | 0    |
| Klebsiella aerogenes/Kluyvera cryocrescens | 0    | 0    | 0    | 0    | 0    | 0    | 0    | 0    | 0    | 0    | 0    | 0    | 0    | 0    | 0    | 0    | 0    | 0    | 0    | 0    | 0    | 0    |
| Rothia mucilaginosus                       | 0    | 0    | 0    | 0    | 0    | 0    | 0    | 0    | 0    | 0    | 0    | 0    | 0    | 0    | 0    | 0    | 0    | 0    | 0    | 0    | 0    | 0    |
| Solobacterium moorei                       | 0    | 0    | 0    | 0    | 0    | 0    | 0    | 0    | 0    | 0    | 0    | 0    | 0    | 0    | 0    | 0    | 0    | 0    | 0    | 0    | 0    | 0    |
| Mageeibacillus indolicus                   | 0    | 0    | 0    | 65   | 0    | 0    | 0    | 0    | 0    | 0    | 0    | 0    | 0    | 0    | 0    | 0    | 0    | 0    | 0    | 0    | 0    | 0    |
| Serratia urelytica                         | 0    | 0    | 0    | 0    | 0    | 0    | 0    | 0    | 0    | 0    | 0    | 0    | 0    | 0    | 0    | 0    | 0    | 0    | 0    | 0    | 0    | 0    |
| Peptoniphilus obesi                        | 0    | 0    | 0    | 0    | 0    | 0    | 0    | 0    | 0    | 0    | 0    | 0    | 0    | 0    | 0    | 0    | 0    | 0    | 0    | 0    | 0    | 0    |
| Peptoniphilus harei/phoceensis             | 0    | 0    | 0    | 0    | 0    | 0    | 0    | 0    | 0    | 0    | 0    | 0    | 0    | 0    | 0    | 0    | 0    | 0    | 0    | 0    | 0    | 0    |
| Corynebacterium atypicum                   | 0    | 0    | 0    | 42   | 0    | 0    | 0    | 0    | 0    | 0    | 0    | 0    | 0    | 0    | 0    | 0    | 0    | 0    | 0    | 0    | 0    | 0    |
| Atopobium minutum                          | 0    | 0    | 0    | 0    | 0    | 0    | 0    | 0    | 0    | 0    | 0    | 0    | 0    | 0    | 0    | 0    | 0    | 0    | 0    | 0    | 0    | 0    |
| Corynebacterium genitalium                 | 0    | 0    | 0    | 0    | 216  | 0    | 0    | 0    | 0    | 0    | 0    | 0    | 0    | 0    | 0    | 0    | 0    | 0    | 0    | 0    | 0    | 0    |
| Bifidobacterium tsurumiense                | 0    | 0    | 0    | 0    | 0    | 0    | 0    | 0    | 0    | 0    | 0    | 0    | 0    | 0    | 0    | 0    | 0    | 0    | 0    | 0    | 0    | 0    |
| Micrococcus                                | 0    | 0    | 0    | 0    | 0    | 0    | 0    | 0    | 0    | 0    | 29   | 0    | 0    | 0    | 0    | 0    | 0    | 0    | 0    | 0    | 0    | 0    |
| Megasphaera genomsp. type_1                | 0    | 0    | 0    | 0    | 0    | 0    | 0    | 0    | 0    | 0    | 0    | 0    | 0    | 0    | 0    | 0    | 0    | 0    | 0    | 0    | 0    | 0    |
| Enhydrobacter                              | 0    | 0    | 0    | 0    | 0    | 0    | 0    | 0    | 0    | 0    | 0    | 0    | 0    | 0    | 0    | 0    | 0    | 0    | 0    | 52   | 0    | 0    |
| Fastidiosipila sanguinis                   | 0    | 0    | 0    | 68   | 74   | 0    | 0    | 0    | 0    | 0    | 0    | 0    | 0    | 0    | 0    | 0    | 0    | 0    | 0    | 0    | 0    | 0    |
| Prevotellamassilia                         | 0    | 0    | 0    | 0    | 0    | 0    | 91   | 0    | 0    | 0    | 0    | 0    | 0    | 0    | 0    | 0    | 0    | 0    | 0    | 0    | 0    | 0    |
| Peptostreptococcaceae                      | 0    | 0    | 0    | 0    | 0    | 0    | 0    | 0    | 0    | 0    | 0    | 0    | 0    | 0    | 0    | 0    | 0    | 0    | 0    | 0    | 0    | 0    |
| Morganella morganii                        | 0    | 0    | 0    | 0    | 0    | 0    | 0    | 0    | 0    | 0    | 0    | 0    | 0    | 0    | 0    | 0    | 0    | 0    | 0    | 0    | 0    | 0    |
| Neofamilia                                 | 0    | 0    | 0    | 0    | 0    | 0    | 0    | 0    | 0    | 0    | 0    | 0    | 0    | 47   | 0    | 0    | 0    | 0    | 0    | 0    | 0    | 0    |
| Pseudoclavibacter bifida                   | 0    | 0    | 0    | 0    | 248  | 0    | 0    | 0    | 0    | 0    | 0    | 0    | 0    | 0    | 0    | 0    | 0    | 64   | 0    | 0    | 0    | 0    |
| Helcococcus                                | 0    | 0    | 0    | 0    | 29   | 0    | 0    | 0    | 0    | 0    | 0    | 0    | 0    | 0    | 0    | 0    | 0    | 0    | 0    | 0    | 0    | 0    |
| Brevibacterium ravenburgense               | 0    | 0    | 0    | 0    | 700  | 0    | 0    | 0    | 0    | 0    | 0    | 0    | 0    | 0    | 0    | 0    | 0    | 0    | 0    | 0    | 0    | 0    |
| Moryella indoligenes                       | 0    | 0    | 0    | 0    | 0    | 0    | 0    | 0    | 0    | 0    | 0    | 0    | 0    | 0    | 0    | 0    | 0    | 0    | 0    | 0    | 0    | 0    |
| Olegusella massiliensis                    | 0    | 0    | 0    | 0    | 0    | 0    | 0    | 0    | 0    | 0    | 0    | 0    | 0    | 0    | 0    | 0    | 0    | 0    | 0    | 0    | 0    | 0    |
| Morococcus cerebrosus                      | 0    | 0    | 0    | 0    | 0    | 0    | 0    | 0    | 0    | 0    | 0    | 0    | 0    | 0    | 0    | 0    | 0    | 0    | 0    | 0    | 0    | 0    |
| Prevotella scopos                          | 0    | 0    | 0    | 0    | 0    | 0    | 0    | 0    | 0    | 0    | 0    | 0    | 0    | 0    | 0    | 0    | 0    | 0    | 0    | 0    | 0    | 0    |
| Veillonella parvula/tobetsuensis           | 0    | 0    | 0    | 0    | 0    | 0    | 0    | 0    | 0    | 0    | 0    | 0    | 0    | 0    | 0    | 0    | 0    | 0    | 0    | 0    | 0    | 0    |
| Moryella                                   | 0    | 0    | 0    | 0    | 0    | 0    | 0    | 0    | 0    | 0    | 0    | 0    | 0    | 0    | 0    | 0    | 0    | 0    | 0    | 0    | 0    | 0    |
| Atopobium parvulum                         | 0    | 0    | 0    | 0    | 0    | 0    | 0    | 0    | 0    | 0    | 0    | 0    | 0    | 0    | 0    | 0    | 0    | 0    | 0    | 0    | 0    | 0    |
| Serratia marcescens                        | 0    | 0    | 0    | 0    | 0    | 0    | 0    | 0    | 0    | 0    | 0    | 0    | 0    | 0    | 0    | 0    | 0    | 0    | 0    | 0    | 0    | 0    |
| Collinsella aerofaciens                    | 0    | 0    | 0    | 0    | 0    | 0    | 0    | 0    | 0    | 0    | 0    | 0    | 0    | 0    | 0    | 0    | 0    | 0    | 0    | 0    | 0    | 0    |
| Curvibacter                                | 0    | 0    | 0    | 0    | 0    | 0    | 0    | 0    | 0    | 0    | 0    | 0    | 0    | 0    | 0    | 0    | 0    | 0    | 0    | 0    | 0    | 0    |
| Rothia dentocariosa                        | 0    | 0    | 0    | 0    | 0    | 0    | 0    | 0    | 0    | 0    | 0    | 0    | 0    | 0    | 0    | 0    | 0    | 0    | 0    | 0    | 0    | 0    |
| Prevotella bergensis                       | 0    | 0    | 0    | 0    | 0    | 0    | 0    | 0    | 0    | 0    | 0    | 0    | 0    | 0    | 0    | 0    | 0    | 0    | 0    | 0    | 0    | 0    |
| Corynebacterium sundsvallense              | 0    | 0    | 0    | 0    | 102  | 0    | 0    | 0    | 0    | 0    | 0    | 0    | 0    | 0    | 0    | 0    | 0    | 0    | 0    | 0    | 0    | 0    |

Samples S200 - S225

| Species                                       | S200 | S201 | S202 | S203 | S205 | S206 | S207 | S208 | S209 | S210 | S211 | S212 | S213 | S215 | S216 | S217 | S218 | S219 | S222 | S223 | S224 | S225 |
|-----------------------------------------------|------|------|------|------|------|------|------|------|------|------|------|------|------|------|------|------|------|------|------|------|------|------|
| Coriobacteria                                 | 0    | 0    | 0    | 0    | 0    | 0    | 0    | 0    | 0    | 0    | 0    | 0    | 0    | 0    | 0    | 0    | 0    | 0    | 0    | 0    | 0    | 0    |
| Neisseria meningitidis                        | 0    | 0    | 0    | 0    | 0    | 0    | 0    | 0    | 0    | 0    | 0    | 0    | 0    | 0    | 0    | 0    | 0    | 0    | 0    | 0    | 0    | 0    |
| Dermacoccus nishinomiyaensis                  | 0    | 37   | 0    | 0    | 0    | 0    | 0    | 0    | 0    | 0    | 0    | 0    | 0    | 0    | 0    | 0    | 0    | 0    | 47   | 0    | 0    | 0    |
| Leptotrichia                                  | 0    | 0    | 0    | 0    | 0    | 0    | 0    | 0    | 0    | 0    | 0    | 0    | 0    | 0    | 0    | 0    | 0    | 0    | 0    | 0    | 0    | 0    |
| Microbacteriaceae                             | 0    | 0    | 0    | 0    | 35   | 0    | 0    | 0    | 0    | 0    | 0    | 0    | 0    | 0    | 0    | 0    | 0    | 0    | 0    | 0    | 0    | 0    |
| Klebsiella pneumoniae/variiicola              | 0    | 0    | 0    | 0    | 0    | 0    | 0    | 0    | 0    | 0    | 0    | 0    | 0    | 0    | 0    | 0    | 0    | 0    | 0    | 0    | 0    | 0    |
| Hafnia alvei                                  | 0    | 0    | 0    | 0    | 0    | 0    | 0    | 0    | 0    | 0    | 0    | 0    | 0    | 0    | 0    | 0    | 0    | 0    | 0    | 0    | 0    | 0    |
| Caulobacter                                   | 0    | 36   | 0    | 0    | 0    | 0    | 0    | 0    | 0    | 0    | 0    | 0    | 0    | 0    | 0    | 0    | 0    | 0    | 0    | 0    | 0    | 0    |
| Lactobacillus reuteri                         | 0    | 0    | 0    | 0    | 0    | 0    | 0    | 0    | 0    | 0    | 0    | 0    | 0    | 0    | 0    | 0    | 0    | 0    | 0    | 0    | 0    | 0    |
| Gemella morbillorum                           | 0    | 0    | 0    | 0    | 0    | 0    | 0    | 0    | 0    | 0    | 0    | 0    | 0    | 0    | 0    | 0    | 0    | 0    | 0    | 0    | 0    | 0    |
| Rothia                                        | 0    | 0    | 0    | 0    | 0    | 0    | 0    | 0    | 0    | 0    | 0    | 0    | 0    | 0    | 0    | 0    | 0    | 0    | 0    | 0    | 0    | 0    |
| Campylobacter                                 | 0    | 0    | 0    | 0    | 0    | 0    | 0    | 0    | 0    | 0    | 0    | 0    | 0    | 0    | 0    | 0    | 0    | 0    | 0    | 0    | 0    | 0    |
| Prevotella genogroup 3                        | 0    | 0    | 0    | 0    | 0    | 0    | 0    | 0    | 0    | 0    | 0    | 0    | 0    | 0    | 0    | 0    | 0    | 0    | 0    | 0    | 0    | 0    |
| Staphylococcus warneri                        | 0    | 0    | 0    | 0    | 0    | 0    | 0    | 0    | 0    | 0    | 0    | 0    | 0    | 0    | 0    | 0    | 0    | 30   | 0    | 0    | 0    | 0    |
| Blautia wexlerae                              | 0    | 0    | 0    | 0    | 0    | 0    | 0    | 0    | 0    | 0    | 0    | 0    | 0    | 0    | 0    | 0    | 0    | 0    | 0    | 0    | 0    | 0    |
| Lachnoanaerobaculum                           | 0    | 0    | 0    | 0    | 0    | 0    | 0    | 0    | 0    | 0    | 0    | 0    | 0    | 0    | 0    | 0    | 0    | 0    | 0    | 0    | 0    | 0    |
| Anaerococcus hydrogenalis/senegalensis        | 0    | 0    | 0    | 0    | 0    | 0    | 0    | 0    | 0    | 0    | 0    | 0    | 0    | 0    | 0    | 0    | 0    | 0    | 0    | 0    | 0    | 0    |
| Brevibacterium mcbrellneri                    | 0    | 0    | 0    | 0    | 0    | 0    | 0    | 0    | 0    | 0    | 0    | 0    | 0    | 0    | 0    | 0    | 0    | 0    | 0    | 0    | 0    | 0    |
| Corynebacterium glaucum                       | 0    | 0    | 0    | 0    | 0    | 0    | 0    | 0    | 0    | 0    | 0    | 0    | 0    | 0    | 0    | 0    | 0    | 0    | 0    | 0    | 0    | 0    |
| Prevotella salivae                            | 0    | 0    | 0    | 0    | 0    | 0    | 0    | 0    | 0    | 0    | 0    | 0    | 0    | 0    | 0    | 0    | 0    | 0    | 0    | 0    | 0    | 0    |
| Coriobacteriaceae                             | 0    | 0    | 0    | 0    | 0    | 0    | 0    | 0    | 0    | 0    | 0    | 0    | 0    | 0    | 0    | 0    | 0    | 0    | 0    | 0    | 0    | 0    |
| Bulleidia                                     | 0    | 0    | 0    | 0    | 0    | 0    | 0    | 0    | 0    | 0    | 0    | 0    | 0    | 0    | 0    | 0    | 0    | 0    | 0    | 0    | 0    | 0    |
| Peptococcus                                   | 0    | 0    | 0    | 0    | 0    | 0    | 0    | 0    | 0    | 0    | 0    | 0    | 0    | 0    | 0    | 0    | 0    | 0    | 0    | 0    | 0    | 0    |
| Serratia marcescens/nematodiphila             | 0    | 0    | 0    | 0    | 0    | 0    | 0    | 0    | 0    | 0    | 0    | 0    | 0    | 0    | 0    | 0    | 0    | 0    | 0    | 0    | 0    | 0    |
| Leptotrichia wadei                            | 0    | 0    | 0    | 0    | 0    | 0    | 0    | 0    | 0    | 0    | 0    | 0    | 0    | 0    | 0    | 0    | 0    | 0    | 0    | 0    | 0    | 0    |
| Neisseriaceae                                 | 0    | 0    | 0    | 0    | 0    | 0    | 0    | 0    | 0    | 0    | 0    | 0    | 0    | 0    | 0    | 0    | 0    | 0    | 0    | 0    | 0    | 0    |
| Aerococcus sanguinicola                       | 0    | 0    | 0    | 0    | 0    | 0    | 0    | 0    | 0    | 0    | 0    | 0    | 0    | 0    | 0    | 0    | 0    | 0    | 0    | 0    | 0    | 0    |
| Criobacterium bergeronii                      | 0    | 0    | 0    | 0    | 0    | 0    | 0    | 0    | 0    | 0    | 0    | 0    | 0    | 0    | 0    | 0    | 0    | 0    | 0    | 0    | 0    | 0    |
| Brevibacterium luteolum                       | 0    | 0    | 0    | 0    | 227  | 0    | 0    | 0    | 0    | 0    | 0    | 227  | 0    | 0    | 0    | 0    | 0    | 0    | 0    | 0    | 0    | 0    |
| Klebsiella pneumoniae                         | 0    | 0    | 0    | 0    | 0    | 0    | 0    | 0    | 0    | 0    | 0    | 0    | 0    | 0    | 0    | 0    | 0    | 0    | 0    | 0    | 0    | 0    |
| Actinomyces oris/viscosus                     | 0    | 0    | 0    | 0    | 0    | 0    | 0    | 0    | 0    | 0    | 0    | 0    | 0    | 0    | 0    | 0    | 0    | 0    | 0    | 0    | 0    | 0    |
| Mycobacterium chelonae complex                | 0    | 27   | 0    | 0    | 0    | 0    | 0    | 0    | 0    | 0    | 0    | 0    | 0    | 0    | 0    | 0    | 0    | 0    | 0    | 0    | 0    | 0    |
| Corynebacterium jeddahense                    | 0    | 0    | 0    | 0    | 0    | 0    | 0    | 0    | 0    | 0    | 0    | 0    | 0    | 0    | 0    | 0    | 0    | 0    | 0    | 0    | 0    | 0    |
| Peptostreptococcus stomatis                   | 0    | 0    | 0    | 0    | 0    | 0    | 0    | 0    | 0    | 0    | 0    | 0    | 0    | 0    | 0    | 0    | 0    | 0    | 0    | 0    | 0    | 0    |
| Megasphaera                                   | 0    | 0    | 0    | 0    | 0    | 0    | 0    | 0    | 0    | 0    | 0    | 0    | 0    | 0    | 0    | 0    | 0    | 0    | 0    | 0    | 0    | 0    |
| Campylobacter rectus/showae                   | 0    | 0    | 0    | 0    | 0    | 0    | 0    | 0    | 0    | 0    | 0    | 0    | 0    | 0    | 0    | 0    | 0    | 0    | 0    | 0    | 0    | 0    |
| Staphylococcus carnosus/condimenti            | 0    | 0    | 0    | 0    | 0    | 0    | 0    | 0    | 0    | 0    | 0    | 0    | 0    | 0    | 0    | 0    | 0    | 0    | 0    | 0    | 0    | 0    |
| Prevotella pallens                            | 0    | 0    | 0    | 0    | 0    | 0    | 0    | 0    | 0    | 0    | 0    | 0    | 0    | 0    | 0    | 0    | 0    | 0    | 0    | 0    | 0    | 0    |
| Prolinoborus fasciculus/Acinetobacter lwoffii | 0    | 0    | 0    | 0    | 0    | 0    | 0    | 0    | 0    | 0    | 0    | 0    | 0    | 0    | 0    | 0    | 0    | 0    | 0    | 0    | 0    | 0    |
| Staphylococcus nepalensis                     | 0    | 0    | 0    | 0    | 0    | 0    | 0    | 0    | 0    | 0    | 0    | 0    | 0    | 0    | 0    | 0    | 0    | 0    | 0    | 0    | 0    | 0    |
| Staphylococcaceae                             | 0    | 0    | 0    | 0    | 0    | 0    | 0    | 0    | 0    | 0    | 0    | 0    | 0    | 0    | 0    | 0    | 0    | 0    | 0    | 0    | 0    | 0    |
| Cruoricaptor                                  | 0    | 0    | 0    | 0    | 0    | 0    | 0    | 0    | 0    | 0    | 0    | 0    | 0    | 0    | 0    | 0    | 0    | 0    | 0    | 0    | 0    | 0    |
| [Eubacterium] hallii                          | 0    | 0    | 0    | 0    | 0    | 0    | 0    | 0    | 0    | 0    | 0    | 0    | 0    | 0    | 0    | 0    | 0    | 0    | 0    | 0    | 0    | 0    |
| BVAB1 (species)                               | 0    | 0    | 0    | 0    | 0    | 0    | 0    | 0    | 0    | 0    | 0    | 0    | 0    | 0    | 0    | 0    | 0    | 0    | 0    | 0    | 0    | 0    |
| Stomatobaculum                                | 0    | 0    | 0    | 0    | 0    | 0    | 0    | 0    | 0    | 0    | 0    | 0    | 0    | 0    | 0    | 0    | 0    | 0    | 0    | 0    | 0    | 0    |
| Mycoplasma                                    | 0    | 0    | 0    | 0    | 0    | 0    | 0    | 0    | 0    | 0    | 0    | 0    | 0    | 0    | 0    | 0    | 0    | 0    | 0    | 0    | 0    | 0    |
| Catenibacterium mitsuokai                     | 0    | 0    | 0    | 0    | 0    | 0    | 0    | 0    | 0    | 0    | 0    | 0    | 0    | 0    | 0    | 0    | 0    | 0    | 0    | 0    | 0    | 0    |
| Veillonella parvula                           | 0    | 0    | 0    | 0    | 0    | 0    | 0    | 0    | 0    | 0    | 0    | 0    | 0    | 0    | 0    | 0    | 0    | 0    | 0    | 0    | 0    | 0    |
| Corynebacterium kroppenstedtii                | 0    | 0    | 0    | 0    | 0    | 0    | 0    | 0    | 0    | 0    | 0    | 0    | 0    | 0    | 0    | 0    | 0    | 0    | 0    | 0    | 0    | 0    |
| Eremococcus coleocola                         | 0    | 0    | 0    | 0    | 135  | 0    | 0    | 0    | 0    | 0    | 0    | 0    | 0    | 0    | 0    | 0    | 0    | 0    | 0    | 0    | 0    | 0    |
| Actinomyces europaeus                         | 0    | 0    | 0    | 0    | 0    | 0    | 0    | 0    | 0    | 0    | 0    | 0    | 0    | 0    | 0    | 0    | 0    | 0    | 0    | 0    | 0    | 0    |
| Peptoniphilus senegalensis                    | 0    | 0    | 0    | 0    | 0    | 0    | 0    | 0    | 0    | 0    | 0    | 0    | 0    | 0    | 0    | 0    | 0    | 0    | 0    | 0    | 0    | 0    |
| Corynebacterium afermentans/humii             | 0    | 0    | 0    | 0    | 0    | 0    | 0    | 0    | 0    | 0    | 0    | 0    | 0    | 0    | 0    | 0    | 0    | 0    | 0    | 0    | 0    | 0    |
| Acinetobacter                                 | 0    | 0    | 0    | 0    | 0    | 0    | 0    | 0    | 0    | 0    | 0    | 0    | 0    | 0    | 0    | 0    | 0    | 0    | 0    | 0    | 0    | 0    |
| Eggerthellaceae                               | 0    | 0    | 0    | 0    | 0    | 0    | 0    | 0    | 0    | 0    | 0    | 0    | 0    | 0    | 0    | 0    | 0    | 0    | 0    | 0    | 0    | 0    |
| Corynebacterium mucifaciens                   | 0    | 0    | 0    | 0    | 0    | 0    | 0    | 0    | 0    | 0    | 0    | 0    | 0    | 202  | 0    | 0    | 0    | 0    | 0    | 0    | 0    | 0    |
| Filifactor                                    | 0    | 0    | 0    | 0    | 0    | 0    | 0    | 0    | 0    | 0    | 0    | 0    | 0    | 0    | 0    | 0    | 0    | 0    | 0    | 0    | 0    | 0    |
| Ruminococcus faecis                           | 0    | 0    | 0    | 0    | 0    | 0    | 0    | 0    | 0    | 0    | 0    | 0    | 0    | 0    | 0    | 0    | 0    | 0    | 0    | 0    | 0    | 0    |
| Lactobacillus                                 | 0    | 0    | 0    | 0    | 0    | 0    | 0    | 0    | 0    | 0    | 0    | 0    | 0    | 0    | 0    | 0    | 0    | 0    | 0    | 0    | 0    | 0    |
| Peptoniphilus grossensis/rhinitidis           | 0    | 0    | 0    | 0    | 0    | 0    | 0    | 0    | 0    | 0    | 0    | 0    | 0    | 0    | 0    | 0    | 0    | 0    | 0    | 0    | 0    | 0    |
| Aerococcus urinaequi/viridans                 | 0    | 0    | 0    | 0    | 0    | 0    | 0    | 0    | 0    | 0    | 0    | 0    | 0    | 0    | 0    | 0    | 0    | 0    | 0    | 0    | 0    | 0    |
| Anaerostipes hadrus                           | 0    | 0    | 0    | 0    | 0    | 0    | 0    | 0    | 0    | 0    | 0    | 0    | 0    | 0    | 0    | 0    | 0    | 0    | 0    | 0    | 0    | 0    |
| Lagierella                                    | 0    | 0    | 0    | 0    | 0    | 0    | 0    | 0    | 0    | 0    | 0    | 0    | 0    | 0    | 0    | 0    | 0    | 0    | 0    | 0    | 0    | 0    |
| Neisseria cinerea/meningitidis                | 0    | 0    | 0    | 0    | 0    | 0    | 0    | 0    | 0    | 0    | 0    | 0    | 0    | 0    | 0    | 0    | 0    | 0    | 0    | 0    | 0    | 0    |
| Micrococcus lylae                             | 0    | 0    | 0    | 0    | 0    | 0    | 0    | 0    | 0    | 0    | 0    | 0    | 0    | 0    | 0    | 0    | 0    | 0    | 0    | 0    | 0    | 0    |
| Staphylococcus cohnii                         | 0    | 0    | 0    | 0    | 0    | 0    | 0    | 0    | 0    | 0    | 0    | 0    | 0    | 0    | 0    | 0    | 0    | 0    | 0    | 0    | 0    | 0    |
| Casaltella massiliensis                       | 0    | 0    | 0    | 0    | 0    | 0    | 0    | 0    | 0    | 0    | 0    | 0    | 0    | 0    | 0    | 0    | 0    | 0    | 0    | 0    | 0    | 0    |
| Stomatobaculum longum                         | 0    | 0    | 0    | 0    | 0    | 0    | 0    | 0    | 0    | 0    | 0    | 0    | 0    | 0    | 0    | 0    | 0    | 0    | 0    | 0    | 0    | 0    |
| Lautropia                                     | 0    | 0    | 0    | 0    | 0    | 0    | 0    | 0    | 0    | 0    | 0    | 0    | 0    | 0    | 0    | 0    | 0    | 0    | 0    | 0    | 0    | 0    |
| Fastidiosipila                                | 0    | 0    | 0    | 0    | 0    | 0    | 0    | 0    | 0    | 0    | 0    | 0    | 0    | 0    | 0    | 0    | 0    | 0    | 0    | 0    | 0    | 0    |

Samples S200 - S225

| Species                                      | S200 | S201 | S202 | S203 | S205 | S206 | S207 | S208 | S209 | S210 | S211 | S212 | S213 | S215 | S216 | S217 | S218 | S219 | S222 | S223 | S224 | S225 |
|----------------------------------------------|------|------|------|------|------|------|------|------|------|------|------|------|------|------|------|------|------|------|------|------|------|------|
| Corynebacterium durum                        | 0    | 0    | 0    | 0    | 0    | 0    | 0    | 0    | 0    | 0    | 0    | 0    | 0    | 0    | 0    | 0    | 0    | 0    | 0    | 0    | 0    | 0    |
| Actinomyces graevenitzi                      | 0    | 0    | 0    | 0    | 0    | 0    | 0    | 0    | 0    | 0    | 0    | 0    | 0    | 0    | 0    | 0    | 0    | 0    | 0    | 0    | 0    | 0    |
| Staphylococcus cohnii/saprophyticus          | 0    | 0    | 0    | 0    | 0    | 0    | 0    | 0    | 0    | 0    | 0    | 0    | 0    | 0    | 0    | 0    | 0    | 0    | 0    | 0    | 0    | 0    |
| Leptotrichia trevisanii                      | 0    | 0    | 0    | 0    | 0    | 0    | 0    | 0    | 0    | 0    | 0    | 0    | 0    | 0    | 0    | 0    | 0    | 0    | 0    | 0    | 0    | 0    |
| Candidatus Paraburkholderia calva            | 0    | 0    | 0    | 0    | 0    | 0    | 0    | 0    | 0    | 0    | 0    | 0    | 0    | 0    | 0    | 0    | 0    | 0    | 0    | 0    | 0    | 0    |
| Actinomyces urogenitalis                     | 0    | 0    | 0    | 0    | 0    | 0    | 0    | 0    | 0    | 0    | 0    | 0    | 0    | 0    | 0    | 0    | 0    | 0    | 0    | 0    | 0    | 0    |
| Clostridiales                                | 0    | 0    | 0    | 0    | 0    | 0    | 0    | 0    | 0    | 0    | 0    | 0    | 0    | 0    | 0    | 0    | 0    | 0    | 0    | 0    | 0    | 0    |
| Pasteurella caballi                          | 0    | 0    | 0    | 0    | 0    | 0    | 0    | 0    | 0    | 0    | 0    | 0    | 0    | 0    | 0    | 0    | 0    | 0    | 0    | 0    | 0    | 0    |
| Fusobacterium hwasookii/nucleatum            | 0    | 0    | 0    | 0    | 0    | 0    | 0    | 0    | 0    | 0    | 0    | 0    | 0    | 0    | 0    | 0    | 0    | 0    | 0    | 0    | 0    | 0    |
| Corynebacterium riegelii                     | 0    | 0    | 0    | 0    | 134  | 0    | 0    | 0    | 0    | 0    | 0    | 0    | 0    | 0    | 0    | 0    | 0    | 0    | 0    | 0    | 0    | 0    |
| Hafnia                                       | 0    | 0    | 0    | 0    | 0    | 0    | 0    | 0    | 0    | 0    | 0    | 0    | 0    | 0    | 0    | 0    | 0    | 0    | 0    | 0    | 0    | 0    |
| Staphylococcus equorum/saprophyticus/xylosum | 0    | 0    | 0    | 0    | 0    | 0    | 0    | 0    | 0    | 0    | 0    | 0    | 0    | 0    | 0    | 0    | 0    | 0    | 0    | 0    | 0    | 0    |
| Acinetobacter lwoffii                        | 0    | 0    | 0    | 0    | 0    | 0    | 0    | 0    | 0    | 0    | 0    | 0    | 0    | 0    | 0    | 0    | 0    | 0    | 0    | 0    | 0    | 0    |
| Micrococcus cohnii                           | 0    | 0    | 0    | 0    | 0    | 0    | 0    | 0    | 0    | 0    | 0    | 0    | 0    | 0    | 0    | 0    | 0    | 0    | 0    | 0    | 0    | 0    |
| Pseudoclavibacter faecalis                   | 0    | 0    | 0    | 0    | 55   | 0    | 0    | 0    | 0    | 0    | 0    | 0    | 0    | 0    | 0    | 0    | 0    | 0    | 0    | 0    | 0    | 0    |
| Leptotrichia buccalis                        | 0    | 0    | 0    | 0    | 0    | 0    | 0    | 0    | 0    | 0    | 0    | 0    | 0    | 0    | 0    | 0    | 0    | 0    | 0    | 0    | 0    | 0    |
| Actinomyces                                  | 0    | 0    | 0    | 0    | 0    | 0    | 0    | 0    | 0    | 0    | 0    | 0    | 0    | 0    | 0    | 0    | 0    | 0    | 0    | 0    | 0    | 0    |
| Fusobacterium nucleatum/periodonticum        | 0    | 0    | 0    | 0    | 0    | 0    | 0    | 0    | 0    | 0    | 0    | 0    | 0    | 0    | 0    | 0    | 0    | 0    | 0    | 0    | 0    | 0    |
| Lactobacillus saerimneri                     | 0    | 0    | 0    | 0    | 0    | 0    | 0    | 0    | 0    | 0    | 0    | 0    | 0    | 0    | 0    | 0    | 0    | 0    | 0    | 0    | 0    | 0    |
| Actinomycetaceae                             | 0    | 0    | 0    | 0    | 0    | 0    | 0    | 0    | 0    | 0    | 0    | 0    | 0    | 0    | 0    | 0    | 0    | 0    | 0    | 0    | 0    | 0    |
| Dialister                                    | 0    | 0    | 0    | 0    | 0    | 0    | 0    | 0    | 0    | 0    | 0    | 0    | 0    | 0    | 0    | 0    | 0    | 0    | 0    | 0    | 0    | 0    |
| Neisseria mucosa/subflava                    | 0    | 0    | 0    | 0    | 0    | 0    | 0    | 0    | 0    | 0    | 0    | 0    | 0    | 0    | 0    | 0    | 0    | 0    | 0    | 0    | 0    | 0    |
| Paracoccus                                   | 0    | 0    | 0    | 0    | 0    | 0    | 0    | 0    | 0    | 0    | 43   | 0    | 0    | 0    | 0    | 0    | 0    | 0    | 0    | 0    | 0    | 0    |
| Acinetobacter haemolyticus/johnsonii         | 0    | 0    | 0    | 0    | 0    | 0    | 0    | 0    | 0    | 0    | 0    | 0    | 0    | 0    | 0    | 0    | 0    | 0    | 0    | 0    | 0    | 0    |
| Neisseria subflava                           | 0    | 0    | 0    | 0    | 0    | 0    | 0    | 0    | 0    | 0    | 0    | 0    | 0    | 0    | 0    | 0    | 0    | 0    | 0    | 0    | 0    | 0    |
| Acinetobacter proteolyticus                  | 0    | 0    | 0    | 0    | 0    | 0    | 0    | 0    | 0    | 0    | 0    | 0    | 0    | 0    | 0    | 0    | 0    | 0    | 0    | 0    | 0    | 0    |
| Dorea formicigenerans                        | 0    | 0    | 0    | 0    | 0    | 0    | 0    | 0    | 0    | 0    | 0    | 0    | 0    | 0    | 0    | 0    | 0    | 0    | 0    | 0    | 0    | 0    |
| Corynebacterium tuscaniense                  | 0    | 0    | 0    | 0    | 0    | 0    | 0    | 0    | 0    | 0    | 0    | 0    | 0    | 0    | 0    | 0    | 0    | 0    | 0    | 0    | 0    | 0    |
| Massiliomicrobiota timonensis                | 0    | 0    | 0    | 0    | 0    | 0    | 0    | 0    | 0    | 0    | 0    | 0    | 0    | 0    | 0    | 0    | 0    | 0    | 0    | 0    | 0    | 0    |
| Fusobacterium hwasookii                      | 0    | 0    | 0    | 0    | 0    | 0    | 0    | 0    | 0    | 0    | 0    | 0    | 0    | 0    | 0    | 0    | 0    | 0    | 0    | 0    | 0    | 0    |
| Pseudoglutamicibacter albus                  | 0    | 0    | 0    | 0    | 44   | 0    | 0    | 0    | 0    | 0    | 0    | 0    | 0    | 0    | 0    | 0    | 0    | 0    | 0    | 0    | 0    | 0    |
| Clostridiales Family XIII. Incertae Sedis    | 0    | 0    | 0    | 0    | 0    | 0    | 0    | 0    | 0    | 0    | 0    | 0    | 0    | 0    | 0    | 0    | 0    | 0    | 0    | 0    | 0    | 0    |
| Kocuria marina/rhizophila                    | 0    | 0    | 0    | 0    | 0    | 0    | 0    | 0    | 0    | 0    | 0    | 0    | 0    | 0    | 0    | 0    | 0    | 0    | 0    | 0    | 0    | 0    |
| Kocuria                                      | 0    | 0    | 0    | 0    | 0    | 0    | 0    | 0    | 0    | 0    | 0    | 0    | 0    | 0    | 0    | 0    | 0    | 0    | 0    | 0    | 0    | 0    |
| Alloprevotella rava                          | 0    | 0    | 0    | 0    | 0    | 0    | 0    | 0    | 0    | 0    | 0    | 0    | 0    | 0    | 0    | 47   | 0    | 0    | 0    | 0    | 0    | 0    |
| Staphylococcus pettenkoferi                  | 0    | 0    | 0    | 0    | 0    | 0    | 0    | 0    | 0    | 0    | 0    | 0    | 0    | 0    | 0    | 0    | 0    | 0    | 0    | 0    | 0    | 0    |
| Streptococcus pseudoporcinus                 | 0    | 0    | 0    | 0    | 0    | 0    | 0    | 0    | 0    | 0    | 0    | 0    | 0    | 0    | 0    | 0    | 0    | 0    | 0    | 0    | 0    | 0    |
| Kingella                                     | 0    | 0    | 0    | 0    | 0    | 0    | 0    | 0    | 0    | 0    | 0    | 0    | 0    | 0    | 0    | 0    | 0    | 0    | 0    | 0    | 0    | 0    |
| Eikenella                                    | 0    | 0    | 0    | 0    | 0    | 0    | 0    | 0    | 0    | 0    | 0    | 0    | 0    | 0    | 0    | 0    | 0    | 0    | 0    | 0    | 0    | 0    |
| Actinomyces odontolyticus                    | 0    | 0    | 0    | 0    | 0    | 0    | 0    | 0    | 0    | 0    | 0    | 0    | 0    | 0    | 0    | 0    | 0    | 0    | 0    | 0    | 0    | 0    |
| Corynebacterium sphenisci                    | 0    | 0    | 0    | 0    | 30   | 0    | 0    | 0    | 0    | 0    | 0    | 0    | 0    | 0    | 0    | 0    | 0    | 0    | 0    | 0    | 0    | 0    |
| Cutibacterium                                | 0    | 0    | 0    | 0    | 0    | 0    | 0    | 0    | 0    | 0    | 0    | 0    | 0    | 0    | 0    | 0    | 0    | 0    | 0    | 0    | 0    | 0    |
| Staphylococcus xylosum                       | 0    | 0    | 0    | 0    | 0    | 0    | 0    | 0    | 0    | 0    | 0    | 0    | 0    | 0    | 0    | 0    | 0    | 0    | 0    | 0    | 0    | 0    |
| Burkholderiales                              | 0    | 0    | 0    | 0    | 0    | 0    | 0    | 0    | 0    | 0    | 0    | 0    | 0    | 0    | 0    | 0    | 0    | 0    | 0    | 0    | 0    | 0    |
| Massiliomicrobiota/Mycoplasma                | 0    | 0    | 0    | 0    | 0    | 0    | 0    | 0    | 0    | 0    | 0    | 0    | 0    | 0    | 0    | 0    | 0    | 0    | 0    | 0    | 0    | 0    |
| Bacteroidales                                | 0    | 0    | 0    | 0    | 0    | 0    | 0    | 0    | 0    | 0    | 0    | 0    | 0    | 0    | 0    | 0    | 0    | 0    | 0    | 0    | 0    | 0    |
| Campylobacter fetus                          | 0    | 0    | 0    | 0    | 0    | 0    | 0    | 0    | 0    | 0    | 0    | 0    | 0    | 0    | 0    | 0    | 0    | 0    | 0    | 0    | 0    | 0    |
| Prevotella aurantiaca                        | 0    | 0    | 0    | 0    | 0    | 0    | 0    | 0    | 0    | 0    | 0    | 0    | 0    | 0    | 0    | 0    | 0    | 0    | 0    | 0    | 0    | 0    |
| Corynebacterium freneyi/xerosis              | 0    | 0    | 0    | 0    | 0    | 0    | 0    | 0    | 0    | 0    | 0    | 0    | 0    | 0    | 0    | 0    | 0    | 0    | 0    | 0    | 0    | 0    |
| Aerococcaceae                                | 0    | 0    | 0    | 0    | 0    | 0    | 0    | 0    | 0    | 0    | 0    | 0    | 0    | 0    | 0    | 0    | 0    | 0    | 0    | 0    | 0    | 0    |
| Moraxella lacunata                           | 0    | 0    | 0    | 0    | 0    | 0    | 0    | 0    | 0    | 0    | 0    | 0    | 0    | 0    | 0    | 0    | 41   | 0    | 0    | 0    | 0    | 0    |
| Corynebacterium accolens/macginleyi          | 0    | 0    | 0    | 0    | 0    | 0    | 0    | 0    | 0    | 0    | 0    | 0    | 0    | 0    | 0    | 0    | 0    | 0    | 0    | 0    | 0    | 0    |
| Massilia aurea                               | 0    | 0    | 0    | 0    | 0    | 0    | 0    | 0    | 0    | 0    | 0    | 0    | 0    | 0    | 0    | 0    | 0    | 0    | 0    | 0    | 0    | 0    |
| Corynebacterium casei                        | 0    | 0    | 0    | 0    | 0    | 0    | 0    | 0    | 0    | 0    | 0    | 0    | 0    | 0    | 0    | 0    | 0    | 0    | 0    | 0    | 0    | 0    |
| Helcococcus sueciensis                       | 0    | 0    | 0    | 0    | 29   | 0    | 0    | 0    | 0    | 0    | 0    | 0    | 0    | 0    | 0    | 0    | 0    | 0    | 0    | 0    | 0    | 0    |
| Lactobacillus casei/rhannosus                | 0    | 0    | 0    | 0    | 0    | 0    | 0    | 0    | 0    | 0    | 0    | 0    | 0    | 0    | 0    | 0    | 0    | 0    | 0    | 0    | 0    | 0    |
| Holdemanella biformis                        | 0    | 0    | 0    | 0    | 0    | 0    | 0    | 0    | 0    | 0    | 0    | 0    | 0    | 0    | 0    | 0    | 0    | 0    | 0    | 0    | 0    | 0    |
| Pelistega                                    | 0    | 0    | 0    | 0    | 0    | 0    | 0    | 0    | 0    | 0    | 0    | 0    | 0    | 0    | 0    | 0    | 0    | 0    | 0    | 0    | 0    | 0    |
| Actinomyces massiliensis                     | 0    | 0    | 0    | 0    | 0    | 0    | 0    | 0    | 0    | 0    | 0    | 0    | 0    | 0    | 0    | 0    | 0    | 0    | 0    | 0    | 0    | 0    |
| Massilia                                     | 0    | 0    | 0    | 0    | 0    | 0    | 0    | 0    | 0    | 0    | 0    | 0    | 0    | 0    | 0    | 0    | 0    | 0    | 0    | 0    | 0    | 0    |
| Staphylococcus equorum/xylosum               | 0    | 0    | 0    | 0    | 0    | 0    | 0    | 0    | 0    | 0    | 0    | 0    | 0    | 0    | 0    | 0    | 0    | 0    | 0    | 0    | 0    | 0    |
| Streptococcus                                | 0    | 0    | 0    | 0    | 0    | 0    | 0    | 0    | 0    | 0    | 0    | 0    | 0    | 0    | 0    | 0    | 0    | 0    | 0    | 0    | 0    | 0    |
| Cutibacterium avidum                         | 0    | 0    | 0    | 0    | 0    | 0    | 0    | 0    | 0    | 0    | 0    | 0    | 0    | 0    | 0    | 0    | 0    | 0    | 0    | 0    | 0    | 0    |



# Samples S226 - S253

| Species                                             | S226  | S227 | S229  | S230  | S231   | S232  | S233  | S235 | S236  | S238 | S239  | S241  | S243  | S244  | S245  | S246  | S247  | S249  | S250  | S251   | S252  | S253  |
|-----------------------------------------------------|-------|------|-------|-------|--------|-------|-------|------|-------|------|-------|-------|-------|-------|-------|-------|-------|-------|-------|--------|-------|-------|
| Streptococcus mitis group                           | 22340 | 858  | 0     | 219   | 967    | 917   | 1034  | 6061 | 71012 | 0    | 40    | 0     | 264   | 5333  | 4843  | 31    | 17918 | 5806  | 26454 | 1693   | 3825  | 22359 |
| Lactobacillus iners                                 | 0     | 0    | 0     | 0     | 64     | 66796 | 0     | 91   | 20953 | 0    | 56    | 0     | 26300 | 0     | 0     | 0     | 0     | 0     | 0     | 63     | 0     | 58    |
| Gardnerella vaginalis                               | 0     | 0    | 0     | 0     | 32     | 1651  | 36    | 7283 | 0     | 0    | 0     | 0     | 513   | 7015  | 0     | 0     | 0     | 4647  | 0     | 34467  | 0     | 3577  |
| Corynebacterium pseudogenitalium/tuberculoelasticum | 1456  | 560  | 1623  | 28    | 71     | 81    | 1223  | 0    | 373   | 0    | 381   | 2180  | 36    | 0     | 0     | 309   | 76    | 0     | 59    | 190    | 103   | 1785  |
| Streptococcus agalactiae                            | 0     | 0    | 0     | 0     | 0      | 42    | 0     | 0    | 0     | 0    | 0     | 0     | 0     | 0     | 0     | 0     | 0     | 804   | 0     | 107211 | 14838 | 0     |
| Veillonella montpellierensis                        | 0     | 0    | 0     | 0     | 0      | 0     | 0     | 4808 | 0     | 0    | 0     | 0     | 0     | 34074 | 1411  | 0     | 0     | 12329 | 0     | 0      | 0     | 5838  |
| Streptococcus anginosus                             | 122   | 91   | 0     | 0     | 0      | 0     | 3952  | 0    | 0     | 0    | 0     | 308   | 198   | 2021  | 0     | 0     | 107   | 585   | 0     | 0      | 0     | 206   |
| Chlamydia trachomatis                               | 0     | 0    | 0     | 53772 | 119018 | 0     | 38859 | 0    | 0     | 7656 | 69359 | 0     | 0     | 0     | 0     | 10688 | 0     | 0     | 0     | 0      | 0     | 31    |
| Haemophilus parainfluenzae                          | 0     | 0    | 0     | 0     | 73     | 0     | 0     | 0    | 0     | 0    | 0     | 40    | 0     | 36    | 0     | 0     | 0     | 913   | 0     | 0      | 0     | 7969  |
| Finegoldia magna                                    | 306   | 2349 | 0     | 0     | 81     | 1222  | 0     | 0    | 76    | 0    | 52    | 316   | 0     | 28    | 0     | 64    | 980   | 686   | 32    | 31     | 0     | 42    |
| Peptoniphilus asaccharolyticus/grossensis/harei     | 0     | 408  | 0     | 0     | 0      | 1401  | 0     | 35   | 0     | 0    | 0     | 659   | 0     | 211   | 0     | 0     | 283   | 1844  | 0     | 0      | 0     | 28    |
| Sneathia amnii                                      | 0     | 0    | 0     | 0     | 0      | 0     | 0     | 4215 | 0     | 29   | 0     | 0     | 0     | 0     | 0     | 0     | 0     | 5066  | 0     | 0      | 0     | 0     |
| Staphylococcus caprae/cohnii/epidermidis            | 884   | 101  | 238   | 40    | 60     | 60    | 0     | 0    | 357   | 0    | 74    | 605   | 128   | 0     | 0     | 96    | 316   | 0     | 85    | 79     | 0     | 313   |
| Gemella haemolysans/taiwanensis                     | 0     | 0    | 0     | 0     | 28     | 0     | 0     | 39   | 0     | 0    | 0     | 0     | 0     | 0     | 185   | 0     | 241   | 0     | 0     | 0      | 1076  | 17960 |
| Sneathia sanguinigena                               | 0     | 0    | 0     | 0     | 0      | 0     | 0     | 482  | 0     | 0    | 0     | 0     | 0     | 0     | 0     | 0     | 0     | 501   | 0     | 0      | 0     | 0     |
| Mycoplasma genitalium                               | 0     | 0    | 0     | 0     | 0      | 0     | 0     | 0    | 0     | 0    | 0     | 0     | 0     | 0     | 0     | 0     | 0     | 0     | 884   | 0      | 0     | 0     |
| Mycoplasma penetrans                                | 0     | 0    | 14371 | 0     | 0      | 0     | 0     | 0    | 0     | 0    | 0     | 31499 | 0     | 0     | 0     | 0     | 0     | 0     | 0     | 0      | 0     | 0     |
| Haemophilus haemolyticus/quentini                   | 0     | 0    | 0     | 0     | 0      | 0     | 0     | 0    | 0     | 0    | 0     | 0     | 0     | 0     | 14562 | 12605 | 0     | 0     | 0     | 15422  | 0     | 0     |
| Corynebacterium pyruviciproducens                   | 0     | 211  | 0     | 0     | 0      | 0     | 0     | 0    | 0     | 0    | 0     | 0     | 0     | 391   | 0     | 0     | 205   | 0     | 0     | 0      | 0     | 0     |
| Anaerococcus prevotii/tetradicus                    | 0     | 147  | 0     | 0     | 0      | 589   | 0     | 0    | 0     | 0    | 34    | 338   | 0     | 0     | 0     | 0     | 0     | 222   | 0     | 0      | 0     | 0     |
| Haemophilus influenzae                              | 0     | 0    | 0     | 40    | 0      | 0     | 0     | 0    | 0     | 0    | 0     | 0     | 0     | 0     | 2899  | 0     | 0     | 0     | 0     | 0      | 0     | 0     |
| Staphylococcus epidermidis/hominis                  | 1253  | 94   | 1847  | 0     | 35     | 371   | 0     | 0    | 109   | 0    | 57    | 1519  | 0     | 0     | 0     | 166   | 72    | 0     | 0     | 0      | 0     | 408   |
| Atopobium vaginae                                   | 0     | 0    | 0     | 0     | 0      | 0     | 0     | 3983 | 0     | 0    | 0     | 0     | 0     | 0     | 0     | 0     | 0     | 0     | 0     | 0      | 0     | 301   |
| Ureaplasma parvum/urealyticum                       | 0     | 0    | 0     | 0     | 0      | 0     | 0     | 0    | 5425  | 0    | 0     | 0     | 0     | 0     | 1551  | 0     | 489   | 350   | 0     | 0      | 0     | 534   |
| Prevotella timonensis                               | 0     | 0    | 0     | 0     | 0      | 95    | 0     | 88   | 0     | 327  | 0     | 27    | 0     | 185   | 0     | 0     | 0     | 770   | 0     | 0      | 0     | 0     |
| Fenollaria massiliensis/timonensis                  | 0     | 0    | 0     | 0     | 0      | 0     | 0     | 0    | 0     | 0    | 0     | 0     | 0     | 0     | 0     | 0     | 0     | 0     | 0     | 0      | 0     | 0     |
| Anaerococcus                                        | 0     | 0    | 0     | 0     | 0      | 0     | 0     | 113  | 0     | 0    | 0     | 539   | 0     | 0     | 0     | 0     | 0     | 213   | 0     | 0      | 0     | 0     |
| Corynebacterium coyleae                             | 164   | 42   | 0     | 0     | 0      | 0     | 0     | 0    | 589   | 0    | 0     | 54    | 0     | 0     | 0     | 0     | 0     | 0     | 0     | 0      | 0     | 227   |
| Prevotella bivia                                    | 0     | 0    | 0     | 0     | 0      | 0     | 0     | 0    | 0     | 0    | 0     | 0     | 0     | 0     | 0     | 0     | 0     | 1868  | 0     | 0      | 0     | 4206  |
| Prevotella melaninogenica                           | 0     | 0    | 0     | 0     | 0      | 980   | 0     | 0    | 0     | 0    | 0     | 0     | 0     | 0     | 0     | 0     | 0     | 0     | 0     | 0      | 0     | 0     |
| Corynebacterium aurimucosum/minutissimum/singulare  | 112   | 0    | 92    | 0     | 0      | 0     | 149   | 0    | 510   | 0    | 37    | 0     | 0     | 0     | 0     | 0     | 0     | 0     | 0     | 33     | 0     | 408   |
| Staphylococcus aureus                               | 0     | 0    | 0     | 0     | 45     | 0     | 0     | 0    | 0     | 0    | 0     | 0     | 0     | 0     | 0     | 0     | 0     | 0     | 0     | 0      | 0     | 0     |
| Anaerococcus lactolyticus                           | 0     | 0    | 0     | 0     | 0      | 0     | 0     | 32   | 0     | 0    | 0     | 0     | 0     | 0     | 0     | 0     | 29    | 0     | 0     | 0      | 0     | 0     |
| Aerococcus christensenii                            | 0     | 0    | 0     | 0     | 0      | 0     | 0     | 742  | 0     | 0    | 0     | 0     | 0     | 0     | 0     | 0     | 0     | 531   | 0     | 0      | 0     | 173   |
| Corynebacterium glucuronolyticum                    | 0     | 297  | 0     | 0     | 0      | 430   | 0     | 0    | 0     | 27   | 495   | 0     | 0     | 0     | 51    | 0     | 0     | 0     | 0     | 0      | 0     | 0     |
| Veillonella atypica                                 | 0     | 0    | 0     | 0     | 0      | 4713  | 0     | 0    | 0     | 0    | 0     | 0     | 114   | 33    | 0     | 0     | 0     | 0     | 0     | 0      | 0     | 0     |
| Veillonella                                         | 0     | 0    | 0     | 0     | 0      | 0     | 0     | 0    | 0     | 0    | 0     | 0     | 0     | 0     | 0     | 0     | 0     | 0     | 0     | 0      | 0     | 0     |
| Mycoplasma hominis                                  | 0     | 0    | 0     | 0     | 0      | 0     | 0     | 0    | 0     | 0    | 0     | 0     | 0     | 0     | 0     | 0     | 0     | 0     | 0     | 0      | 0     | 0     |
| Granulicatella elegans                              | 0     | 0    | 0     | 0     | 0      | 52    | 0     | 1055 | 0     | 0    | 0     | 178   | 0     | 0     | 0     | 0     | 0     | 0     | 0     | 0      | 0     | 0     |
| Ezakiella                                           | 0     | 0    | 0     | 0     | 0      | 135   | 0     | 0    | 0     | 0    | 0     | 0     | 0     | 0     | 0     | 0     | 0     | 32    | 0     | 0      | 0     | 0     |
| Shigella/Escherichia                                | 0     | 0    | 0     | 0     | 0      | 0     | 0     | 0    | 28    | 0    | 0     | 0     | 0     | 0     | 0     | 0     | 0     | 0     | 0     | 0      | 0     | 0     |
| Streptococcus salivarius                            | 0     | 0    | 0     | 0     | 0      | 0     | 0     | 0    | 0     | 0    | 0     | 0     | 0     | 0     | 0     | 0     | 0     | 0     | 0     | 0      | 0     | 0     |
| Actinomyces turicensis                              | 0     | 0    | 0     | 0     | 0      | 505   | 0     | 79   | 0     | 0    | 0     | 67    | 0     | 0     | 0     | 0     | 27    | 86    | 0     | 0      | 0     | 0     |
| Prevotella corporis                                 | 0     | 0    | 0     | 0     | 0      | 0     | 0     | 0    | 0     | 0    | 0     | 0     | 0     | 0     | 0     | 0     | 0     | 0     | 0     | 0      | 0     | 0     |
| Corynebacterium simulans                            | 0     | 487  | 0     | 0     | 61     | 0     | 0     | 0    | 0     | 0    | 0     | 2381  | 0     | 0     | 0     | 361   | 5645  | 0     | 133   | 0      | 0     | 0     |
| Fusobacterium equinum                               | 0     | 0    | 0     | 0     | 0      | 0     | 0     | 0    | 0     | 0    | 0     | 0     | 0     | 0     | 0     | 0     | 0     | 0     | 0     | 0      | 0     | 0     |
| Corynebacterium                                     | 0     | 0    | 0     | 0     | 0      | 0     | 95    | 0    | 116   | 0    | 0     | 1027  | 0     | 26    | 0     | 0     | 0     | 0     | 0     | 0      | 0     | 0     |
| Staphylococcus haemolyticus                         | 207   | 0    | 100   | 34    | 0      | 0     | 38    | 0    | 0     | 0    | 42    | 112   | 0     | 0     | 0     | 187   | 709   | 0     | 0     | 391    | 25    | 497   |
| Gemella asaccharolytica                             | 0     | 0    | 0     | 0     | 0      | 0     | 0     | 1201 | 0     | 0    | 0     | 0     | 0     | 0     | 0     | 0     | 0     | 47    | 0     | 0      | 0     | 0     |
| Peptoniphilus                                       | 0     | 0    | 0     | 0     | 0      | 165   | 0     | 0    | 0     | 0    | 0     | 0     | 0     | 0     | 0     | 0     | 56    | 0     | 0     | 0      | 0     | 0     |
| Corynebacterium hadale/imitans                      | 29    | 0    | 25    | 0     | 0      | 0     | 39    | 0    | 1807  | 0    | 0     | 0     | 0     | 0     | 0     | 0     | 0     | 0     | 0     | 0      | 0     | 189   |
| Eggerthella sp. type 1 (species)                    | 0     | 0    | 0     | 0     | 0      | 0     | 0     | 1487 | 0     | 0    | 0     | 0     | 0     | 0     | 0     | 0     | 0     | 94    | 0     | 0      | 0     | 0     |
| Prevotella disiens                                  | 0     | 0    | 0     | 0     | 0      | 0     | 0     | 0    | 0     | 0    | 0     | 0     | 0     | 0     | 0     | 0     | 1787  | 0     | 0     | 0      | 0     | 0     |
| Peptoniphilus lacrimalis                            | 0     | 0    | 0     | 0     | 0      | 0     | 0     | 0    | 0     | 0    | 0     | 0     | 0     | 0     | 0     | 0     | 0     | 0     | 0     | 0      | 0     | 0     |
| Anaerococcus vaginalis                              | 0     | 0    | 0     | 0     | 0      | 0     | 0     | 0    | 0     | 0    | 0     | 0     | 0     | 49    | 0     | 0     | 0     | 165   | 0     | 0      | 0     | 0     |
| Facklamia hominis                                   | 0     | 0    | 0     | 0     | 0      | 0     | 0     | 0    | 0     | 0    | 1031  | 0     | 0     | 0     | 0     | 0     | 115   | 0     | 0     | 0      | 0     | 0     |
| Prevotella amnii                                    | 0     | 0    | 0     | 0     | 0      | 0     | 0     | 3266 | 0     | 0    | 0     | 0     | 0     | 0     | 0     | 0     | 634   | 0     | 0     | 0      | 0     | 0     |
| Campylobacter ureolyticus                           | 0     | 0    | 0     | 0     | 0      | 0     | 0     | 53   | 0     | 49   | 0     | 0     | 0     | 0     | 0     | 0     | 0     | 267   | 0     | 0      | 0     | 0     |
| BVAB2 (species)                                     | 0     | 0    | 0     | 0     | 0      | 0     | 0     | 542  | 0     | 0    | 0     | 0     | 0     | 0     | 0     | 0     | 0     | 0     | 0     | 0      | 0     | 0     |
| Haemophilus                                         | 0     | 0    | 0     | 0     | 0      | 0     | 0     | 0    | 0     | 0    | 0     | 0     | 0     | 0     | 0     | 0     | 0     | 0     | 0     | 0      | 0     | 0     |
| Anaerococcus hydrogenalis/rubeifantis               | 219   | 249  | 0     | 0     | 0      | 151   | 0     | 0    | 33    | 0    | 0     | 838   | 49    | 0     | 0     | 0     | 107   | 0     | 0     | 0      | 0     | 26    |
| Anaerococcus mediterraneensis                       | 0     | 0    | 0     | 0     | 0      | 1059  | 0     | 80   | 0     | 0    | 0     | 0     | 0     | 0     | 0     | 0     | 123   | 0     | 0     | 0      | 0     | 0     |
| Dialister sp. type 2                                | 0     | 0    | 0     | 0     | 0      | 0     | 0     | 404  | 0     | 0    | 0     | 0     | 0     | 0     | 0     | 0     | 0     | 0     | 0     | 0      | 0     | 0     |
| Dialister microaerophilus                           | 0     | 0    | 0     | 0     | 0      | 0     | 0     | 540  | 0     | 0    | 0     | 0     | 0     | 0     | 0     | 0     | 221   | 0     | 0     | 0      | 0     | 0     |
| Corynebacterium amycolatum                          | 0     | 0    | 0     | 0     | 0      | 0     | 0     | 0    | 0     | 0    | 0     | 0     | 0     | 0     | 0     | 0     | 0     | 0     | 0     | 0      | 0     | 138   |
| Ureaplasma                                          | 0     | 0    | 0     | 0     | 0      | 0     | 0     | 0    | 0     | 0    | 0     | 0     | 0     | 0     | 0     | 0     | 0     | 0     | 0     | 0      | 0     | 438   |
| Enterococcus faecalis                               | 0     | 0    | 0     | 0     | 0      | 0     | 0     | 0    | 0     | 0    | 0     | 302   | 0     | 0     | 0     | 0     | 0     | 0     | 0     | 0      | 0     | 0     |
| Parvimonas                                          | 0     | 0    | 0     | 0     | 0      | 0     | 0     | 0    | 26    | 0    | 0     | 0     | 0     | 0     | 0     | 0     | 125   | 0     | 0     | 0      | 0     | 0     |
| Haemophilus pittmaniae                              | 0     | 0    | 0     | 0     | 0      | 0     | 0     | 0    | 0     | 0    | 0     | 0     | 0     | 0     | 0     | 37    | 0     | 0     | 0     | 0      | 0     | 0     |
| Actinomyces neuii                                   | 0     | 175  | 0     | 0     | 0      | 0     | 0     | 0    | 0     | 0    | 0     | 125   | 0     | 90    | 0     | 0     | 396   | 0     | 0     | 0      | 0     | 0     |

# Samples S226 - S253

| Species                                                | S226 | S227 | S229 | S230 | S231 | S232 | S233 | S235 | S236 | S238 | S239 | S241 | S243 | S244 | S245 | S246 | S247 | S249 | S250 | S251 | S252 | S253 |
|--------------------------------------------------------|------|------|------|------|------|------|------|------|------|------|------|------|------|------|------|------|------|------|------|------|------|------|
| Peptoniphilus rhintidis                                | 0    | 0    | 0    | 0    | 0    | 0    | 0    | 0    | 0    | 0    | 0    | 0    | 0    | 0    | 0    | 0    | 0    | 0    | 0    | 0    | 0    | 0    |
| Anaerococcus senegalensis                              | 0    | 597  | 0    | 0    | 28   | 32   | 0    | 0    | 0    | 0    | 40   | 28   | 0    | 0    | 0    | 0    | 0    | 0    | 0    | 0    | 0    | 0    |
| Peptostreptococcus anaerobius                          | 0    | 0    | 0    | 0    | 0    | 0    | 0    | 0    | 0    | 0    | 0    | 0    | 0    | 0    | 0    | 0    | 0    | 187  | 0    | 0    | 0    | 0    |
| Dialister propionificiens                              | 0    | 0    | 0    | 0    | 0    | 0    | 0    | 0    | 0    | 0    | 0    | 0    | 0    | 0    | 0    | 0    | 0    | 141  | 0    | 0    | 0    | 0    |
| Peptoniphilus harei                                    | 0    | 0    | 0    | 0    | 0    | 0    | 0    | 0    | 36   | 0    | 51   | 42   | 0    | 0    | 0    | 0    | 0    | 0    | 0    | 0    | 0    | 0    |
| Negativococcus succinicivorans                         | 0    | 32   | 0    | 0    | 0    | 63   | 0    | 0    | 0    | 0    | 0    | 150  | 0    | 31   | 0    | 0    | 0    | 67   | 0    | 0    | 0    | 0    |
| Parvimonas micra                                       | 0    | 0    | 0    | 0    | 0    | 0    | 0    | 0    | 0    | 0    | 0    | 0    | 0    | 0    | 0    | 0    | 0    | 0    | 0    | 0    | 0    | 0    |
| Actinomyces ihumii                                     | 0    | 0    | 0    | 0    | 0    | 157  | 0    | 0    | 0    | 0    | 0    | 0    | 0    | 0    | 0    | 0    | 0    | 0    | 0    | 0    | 0    | 0    |
| Actinotignum timonense                                 | 0    | 0    | 0    | 0    | 0    | 0    | 0    | 0    | 0    | 0    | 0    | 0    | 0    | 0    | 0    | 0    | 0    | 0    | 0    | 0    | 0    | 0    |
| Fenollaria                                             | 0    | 0    | 0    | 0    | 0    | 0    | 0    | 0    | 0    | 0    | 0    | 0    | 0    | 0    | 0    | 0    | 0    | 0    | 0    | 0    | 0    | 0    |
| Fusobacterium massiliense                              | 0    | 0    | 0    | 0    | 0    | 0    | 0    | 0    | 0    | 0    | 0    | 0    | 0    | 0    | 0    | 0    | 0    | 0    | 0    | 0    | 0    | 0    |
| Actinobaculum massiliense                              | 0    | 0    | 0    | 0    | 0    | 0    | 0    | 0    | 0    | 0    | 0    | 0    | 0    | 0    | 0    | 0    | 0    | 0    | 0    | 0    | 0    | 0    |
| Peptoniphilus coxii                                    | 0    | 37   | 0    | 0    | 0    | 0    | 0    | 0    | 0    | 0    | 0    | 89   | 0    | 0    | 0    | 0    | 0    | 42   | 0    | 0    | 0    | 0    |
| Staphylococcus lugdunensis                             | 0    | 0    | 0    | 0    | 0    | 0    | 0    | 0    | 0    | 0    | 0    | 0    | 0    | 0    | 0    | 0    | 0    | 0    | 32   | 68   | 0    | 0    |
| Dermabacter                                            | 0    | 0    | 45   | 0    | 0    | 0    | 53   | 0    | 85   | 0    | 0    | 0    | 0    | 0    | 0    | 0    | 0    | 0    | 0    | 0    | 0    | 69   |
| Alloscardovia omnicolens                               | 0    | 0    | 0    | 0    | 0    | 151  | 0    | 0    | 0    | 0    | 0    | 0    | 0    | 0    | 0    | 0    | 0    | 0    | 0    | 0    | 0    | 0    |
| Varibaculum cambriense                                 | 0    | 0    | 0    | 0    | 0    | 900  | 0    | 0    | 0    | 0    | 0    | 0    | 0    | 43   | 0    | 0    | 42   | 64   | 0    | 0    | 0    | 0    |
| Streptococcus urinalis                                 | 0    | 140  | 0    | 0    | 0    | 0    | 0    | 0    | 0    | 0    | 83   | 0    | 0    | 0    | 36   | 0    | 0    | 0    | 0    | 0    | 0    | 0    |
| Corynebacterium appendicis                             | 0    | 0    | 0    | 0    | 0    | 0    | 0    | 0    | 81   | 0    | 0    | 0    | 0    | 0    | 0    | 0    | 0    | 0    | 0    | 0    | 0    | 0    |
| Actinotignum schaalii                                  | 0    | 0    | 0    | 0    | 0    | 0    | 0    | 0    | 0    | 0    | 0    | 0    | 0    | 0    | 0    | 0    | 0    | 0    | 0    | 0    | 0    | 0    |
| Corynebacterium timonense                              | 0    | 0    | 0    | 0    | 0    | 0    | 0    | 0    | 0    | 0    | 0    | 0    | 0    | 0    | 0    | 0    | 0    | 331  | 0    | 0    | 0    | 0    |
| Gemella                                                | 0    | 0    | 0    | 0    | 0    | 0    | 0    | 0    | 0    | 0    | 0    | 0    | 0    | 0    | 0    | 0    | 0    | 0    | 0    | 0    | 0    | 0    |
| Klebsiella aerogenes/Enterobacter asburiae             | 0    | 0    | 0    | 0    | 0    | 0    | 0    | 0    | 0    | 0    | 0    | 0    | 0    | 0    | 0    | 0    | 0    | 0    | 0    | 0    | 0    | 0    |
| Fusobacterium periodonticum                            | 0    | 0    | 0    | 0    | 0    | 31   | 0    | 0    | 0    | 0    | 0    | 0    | 0    | 0    | 0    | 0    | 0    | 0    | 0    | 0    | 0    | 0    |
| Veillonella dispar                                     | 0    | 0    | 0    | 0    | 66   | 0    | 0    | 0    | 0    | 0    | 0    | 0    | 0    | 0    | 0    | 0    | 0    | 0    | 0    | 0    | 0    | 0    |
| Prevotella colorans                                    | 0    | 0    | 0    | 0    | 0    | 0    | 0    | 0    | 0    | 0    | 0    | 0    | 0    | 0    | 0    | 0    | 0    | 0    | 0    | 0    | 0    | 0    |
| Candidatus Peptoniphilus massiliensis                  | 0    | 0    | 0    | 0    | 0    | 0    | 0    | 0    | 0    | 0    | 0    | 0    | 0    | 0    | 0    | 0    | 0    | 0    | 0    | 0    | 0    | 0    |
| Eremococcus                                            | 0    | 0    | 0    | 0    | 0    | 0    | 0    | 0    | 295  | 0    | 0    | 0    | 0    | 0    | 0    | 0    | 0    | 0    | 0    | 0    | 0    | 182  |
| Varibaculum anthropi                                   | 0    | 0    | 0    | 0    | 0    | 0    | 0    | 0    | 0    | 0    | 0    | 0    | 0    | 0    | 0    | 0    | 0    | 41   | 0    | 0    | 0    | 0    |
| Propionimicrobium lymphophilum                         | 0    | 0    | 0    | 0    | 0    | 0    | 0    | 0    | 0    | 0    | 0    | 0    | 0    | 0    | 0    | 0    | 0    | 0    | 0    | 0    | 0    | 0    |
| Streptococcus dysgalactiae                             | 0    | 0    | 0    | 0    | 0    | 0    | 0    | 0    | 0    | 0    | 0    | 0    | 0    | 0    | 0    | 0    | 0    | 0    | 0    | 0    | 0    | 0    |
| Negativococcus                                         | 0    | 28   | 0    | 0    | 0    | 143  | 0    | 0    | 0    | 0    | 0    | 76   | 0    | 0    | 0    | 0    | 0    | 0    | 0    | 0    | 0    | 0    |
| Porphyromonas somerae                                  | 0    | 0    | 0    | 0    | 0    | 0    | 0    | 0    | 0    | 0    | 0    | 0    | 0    | 0    | 0    | 0    | 0    | 0    | 0    | 0    | 0    | 0    |
| Corynebacterium jeikeium                               | 0    | 0    | 0    | 0    | 0    | 0    | 0    | 0    | 0    | 0    | 0    | 0    | 0    | 0    | 0    | 0    | 0    | 0    | 0    | 0    | 0    | 69   |
| Mobiluncus curtisii                                    | 0    | 0    | 0    | 0    | 0    | 0    | 0    | 0    | 0    | 0    | 0    | 0    | 0    | 0    | 0    | 0    | 0    | 0    | 0    | 0    | 0    | 0    |
| Porphyromonas uenonis                                  | 0    | 0    | 0    | 0    | 0    | 0    | 0    | 0    | 0    | 0    | 0    | 0    | 0    | 0    | 0    | 0    | 0    | 0    | 0    | 0    | 0    | 0    |
| Aerococcus urinae                                      | 0    | 0    | 0    | 0    | 0    | 0    | 0    | 0    | 0    | 0    | 0    | 0    | 0    | 0    | 0    | 0    | 0    | 0    | 0    | 0    | 0    | 0    |
| Corynebacterium mycetoides                             | 0    | 0    | 0    | 0    | 0    | 0    | 0    | 0    | 0    | 0    | 0    | 0    | 0    | 0    | 0    | 0    | 0    | 0    | 0    | 0    | 0    | 26   |
| Cutibacterium acnes                                    | 0    | 0    | 0    | 0    | 0    | 0    | 0    | 0    | 0    | 0    | 0    | 0    | 0    | 0    | 0    | 0    | 0    | 0    | 0    | 0    | 0    | 0    |
| Urinacoccus massiliensis                               | 0    | 0    | 0    | 0    | 0    | 58   | 0    | 0    | 0    | 0    | 0    | 0    | 0    | 0    | 0    | 0    | 32   | 0    | 0    | 0    | 0    | 0    |
| Campylobacter hominis                                  | 0    | 0    | 0    | 0    | 0    | 0    | 0    | 0    | 0    | 0    | 0    | 0    | 0    | 0    | 0    | 0    | 0    | 0    | 0    | 0    | 0    | 0    |
| Staphylococcus capitis/caprae                          | 0    | 0    | 0    | 0    | 0    | 0    | 0    | 0    | 0    | 0    | 0    | 0    | 0    | 0    | 0    | 0    | 0    | 0    | 0    | 0    | 0    | 0    |
| Sneathia                                               | 0    | 0    | 0    | 0    | 0    | 0    | 0    | 0    | 0    | 0    | 0    | 0    | 0    | 0    | 0    | 0    | 0    | 0    | 0    | 0    | 0    | 0    |
| Prevotella jejuni                                      | 0    | 0    | 0    | 0    | 0    | 3140 | 0    | 0    | 0    | 0    | 0    | 0    | 0    | 0    | 0    | 0    | 0    | 0    | 0    | 0    | 0    | 0    |
| Varibaculum                                            | 0    | 0    | 0    | 0    | 0    | 0    | 0    | 0    | 0    | 0    | 0    | 0    | 0    | 0    | 0    | 0    | 0    | 0    | 0    | 0    | 0    | 0    |
| Corynebacterium striatum                               | 0    | 0    | 0    | 0    | 0    | 0    | 0    | 0    | 0    | 0    | 0    | 0    | 0    | 0    | 0    | 0    | 0    | 0    | 0    | 0    | 0    | 0    |
| Jonquetella anthropi                                   | 0    | 0    | 0    | 0    | 0    | 0    | 0    | 0    | 0    | 0    | 0    | 0    | 0    | 0    | 0    | 0    | 0    | 0    | 0    | 0    | 0    | 0    |
| Peptoniphilus koeoeneriae                              | 0    | 0    | 0    | 0    | 0    | 0    | 0    | 0    | 0    | 0    | 0    | 0    | 0    | 0    | 0    | 0    | 0    | 0    | 0    | 0    | 0    | 0    |
| Bifidobacterium longum                                 | 0    | 0    | 0    | 0    | 0    | 0    | 0    | 0    | 0    | 0    | 0    | 0    | 0    | 0    | 0    | 0    | 0    | 0    | 0    | 0    | 0    | 0    |
| Helicobacter                                           | 0    | 0    | 0    | 0    | 0    | 0    | 0    | 0    | 0    | 0    | 0    | 0    | 0    | 0    | 0    | 0    | 0    | 0    | 0    | 0    | 0    | 0    |
| Lawsonella clevelandensis                              | 0    | 0    | 0    | 0    | 0    | 0    | 0    | 0    | 0    | 0    | 0    | 0    | 0    | 0    | 0    | 0    | 0    | 0    | 0    | 0    | 0    | 0    |
| Escherichia coli/fergusonii                            | 0    | 0    | 0    | 0    | 0    | 0    | 0    | 0    | 0    | 0    | 0    | 0    | 0    | 0    | 0    | 0    | 0    | 0    | 0    | 0    | 0    | 0    |
| Fusobacterium nucleatum                                | 0    | 0    | 0    | 0    | 0    | 0    | 0    | 526  | 0    | 484  | 0    | 0    | 0    | 0    | 0    | 0    | 0    | 0    | 0    | 0    | 0    | 0    |
| Porphyromonas asaccharolytica                          | 0    | 0    | 0    | 0    | 0    | 0    | 0    | 0    | 0    | 0    | 0    | 0    | 0    | 0    | 0    | 0    | 0    | 0    | 0    | 0    | 0    | 0    |
| Anaerococcus octavius                                  | 0    | 0    | 0    | 0    | 0    | 0    | 0    | 0    | 70   | 0    | 0    | 0    | 0    | 0    | 0    | 0    | 0    | 0    | 26   | 0    | 0    | 0    |
| Fusobacterium                                          | 0    | 0    | 0    | 0    | 0    | 0    | 0    | 0    | 0    | 0    | 0    | 0    | 0    | 0    | 0    | 0    | 0    | 0    | 0    | 0    | 0    | 0    |
| Corynebacterium phoceense                              | 0    | 0    | 0    | 0    | 0    | 0    | 0    | 27   | 0    | 0    | 0    | 0    | 0    | 0    | 0    | 0    | 0    | 0    | 0    | 0    | 0    | 0    |
| Ruminococcus                                           | 0    | 0    | 0    | 0    | 0    | 0    | 0    | 0    | 0    | 0    | 0    | 0    | 0    | 0    | 0    | 0    | 0    | 220  | 0    | 0    | 0    | 0    |
| Arcanobacterium                                        | 0    | 0    | 0    | 0    | 0    | 0    | 0    | 0    | 0    | 0    | 0    | 0    | 0    | 0    | 0    | 0    | 0    | 0    | 0    | 0    | 0    | 0    |
| Khoudiadiopia                                          | 0    | 0    | 0    | 0    | 0    | 0    | 0    | 0    | 0    | 0    | 0    | 0    | 0    | 0    | 0    | 0    | 0    | 0    | 0    | 0    | 0    | 0    |
| Atopobium deltae                                       | 0    | 0    | 0    | 0    | 0    | 0    | 0    | 0    | 0    | 0    | 0    | 0    | 0    | 0    | 0    | 0    | 0    | 0    | 0    | 0    | 0    | 0    |
| Haemophilus parahaemolyticus                           | 0    | 0    | 0    | 0    | 0    | 0    | 0    | 0    | 0    | 0    | 0    | 0    | 0    | 0    | 0    | 0    | 0    | 0    | 0    | 0    | 0    | 0    |
| Howardella                                             | 0    | 0    | 0    | 0    | 0    | 0    | 0    | 0    | 0    | 0    | 0    | 0    | 0    | 0    | 0    | 0    | 0    | 30   | 0    | 0    | 0    | 0    |
| Prevotella buccalis                                    | 0    | 0    | 0    | 0    | 0    | 104  | 0    | 0    | 0    | 0    | 0    | 0    | 0    | 0    | 0    | 0    | 0    | 0    | 0    | 0    | 0    | 0    |
| Corynebacterium auris                                  | 0    | 0    | 0    | 0    | 0    | 0    | 0    | 0    | 0    | 0    | 0    | 0    | 0    | 0    | 0    | 0    | 0    | 0    | 0    | 0    | 0    | 0    |
| Candidatus Mycoplasma gireddii                         | 0    | 0    | 0    | 0    | 0    | 0    | 0    | 0    | 0    | 0    | 0    | 0    | 0    | 0    | 0    | 0    | 0    | 0    | 0    | 0    | 0    | 0    |
| Alloicoccus                                            | 0    | 0    | 0    | 0    | 0    | 0    | 0    | 0    | 0    | 0    | 0    | 0    | 0    | 0    | 0    | 0    | 0    | 0    | 0    | 0    | 0    | 0    |
| Corynebacterium founierii/mucifaciens/ureicelerivorans | 28   | 0    | 0    | 0    | 0    | 0    | 0    | 0    | 106  | 0    | 0    | 57   | 0    | 0    | 0    | 0    | 0    | 0    | 0    | 0    | 0    | 0    |
| Corynebacterium auris/timonense                        | 0    | 0    | 0    | 0    | 0    | 0    | 0    | 0    | 0    | 0    | 0    | 0    | 0    | 0    | 0    | 0    | 0    | 0    | 0    | 0    | 0    | 0    |
| Veillonella ratti/seminalis                            | 0    | 0    | 0    | 0    | 0    | 0    | 0    | 0    | 0    | 0    | 0    | 0    | 0    | 0    | 0    | 0    | 0    | 0    | 0    | 0    | 0    | 0    |

# Samples S226 - S253

| Species                                    | S226 | S227 | S229 | S230 | S231 | S232 | S233 | S235 | S236 | S238 | S239 | S241 | S243 | S244 | S245 | S246 | S247 | S249 | S250 | S251 | S252 | S253 |
|--------------------------------------------|------|------|------|------|------|------|------|------|------|------|------|------|------|------|------|------|------|------|------|------|------|------|
| Lactobacillus gasseri                      | 0    | 0    | 0    | 0    | 0    | 0    | 0    | 0    | 0    | 0    | 0    | 0    | 105  | 0    | 0    | 0    | 0    | 0    | 0    | 0    | 0    | 0    |
| Tissierella                                | 0    | 0    | 0    | 0    | 0    | 0    | 0    | 0    | 0    | 0    | 0    | 0    | 0    | 0    | 0    | 0    | 0    | 0    | 0    | 0    | 0    | 0    |
| Granulicatella adiacens                    | 0    | 0    | 0    | 0    | 134  | 0    | 0    | 0    | 0    | 0    | 0    | 0    | 0    | 0    | 0    | 0    | 0    | 0    | 0    | 0    | 0    | 0    |
| Sutterella                                 | 0    | 0    | 0    | 0    | 0    | 0    | 0    | 0    | 0    | 0    | 0    | 0    | 0    | 0    | 0    | 0    | 0    | 0    | 0    | 0    | 0    | 0    |
| Prevotella nanceiensis                     | 0    | 0    | 0    | 0    | 0    | 0    | 0    | 0    | 0    | 0    | 0    | 0    | 0    | 0    | 0    | 0    | 0    | 0    | 0    | 0    | 0    | 0    |
| Lactobacillus jensenii                     | 0    | 0    | 0    | 0    | 0    | 0    | 0    | 0    | 0    | 0    | 0    | 0    | 0    | 0    | 0    | 0    | 0    | 0    | 0    | 0    | 0    | 0    |
| Lactobacillus crispatus                    | 0    | 0    | 0    | 0    | 0    | 0    | 0    | 0    | 0    | 0    | 0    | 0    | 0    | 0    | 0    | 0    | 0    | 0    | 0    | 0    | 0    | 0    |
| Candidate Division TM7 vaginal (genus)     | 0    | 0    | 0    | 0    | 0    | 0    | 0    | 0    | 0    | 0    | 0    | 0    | 0    | 0    | 0    | 0    | 0    | 153  | 0    | 0    | 0    | 0    |
| Candidatus Saccharimonas                   | 0    | 0    | 0    | 0    | 0    | 0    | 0    | 0    | 0    | 0    | 0    | 0    | 0    | 0    | 0    | 0    | 0    | 0    | 0    | 0    | 0    | 0    |
| Peptococcus niger                          | 0    | 0    | 0    | 0    | 0    | 0    | 0    | 0    | 0    | 0    | 0    | 0    | 0    | 0    | 0    | 0    | 0    | 0    | 0    | 0    | 0    | 0    |
| Neisseria flavescens/perflava              | 0    | 0    | 0    | 0    | 0    | 0    | 0    | 0    | 0    | 0    | 0    | 0    | 0    | 0    | 0    | 0    | 0    | 0    | 0    | 0    | 0    | 0    |
| Gemella sanguinis                          | 0    | 0    | 0    | 0    | 50   | 0    | 0    | 0    | 0    | 0    | 0    | 0    | 0    | 0    | 0    | 0    | 0    | 0    | 0    | 0    | 0    | 0    |
| Porphyromonas                              | 0    | 0    | 0    | 0    | 0    | 0    | 0    | 0    | 0    | 0    | 0    | 0    | 0    | 0    | 0    | 0    | 0    | 0    | 0    | 0    | 0    | 0    |
| Prevotella                                 | 0    | 0    | 0    | 0    | 0    | 0    | 0    | 0    | 0    | 0    | 0    | 0    | 0    | 0    | 0    | 0    | 0    | 0    | 0    | 0    | 0    | 0    |
| Corynebacterium thomssenii                 | 0    | 0    | 0    | 0    | 0    | 0    | 0    | 0    | 169  | 0    | 0    | 0    | 0    | 0    | 0    | 0    | 0    | 0    | 0    | 0    | 0    | 79   |
| Lachnospiraceae                            | 0    | 0    | 0    | 0    | 0    | 0    | 0    | 0    | 0    | 0    | 0    | 0    | 0    | 0    | 0    | 0    | 0    | 0    | 0    | 0    | 0    | 0    |
| Corynebacterium tuberculostearicum         | 0    | 0    | 0    | 0    | 0    | 0    | 0    | 0    | 0    | 0    | 0    | 0    | 0    | 46   | 0    | 0    | 0    | 0    | 0    | 0    | 0    | 0    |
| Dermabacter hominis                        | 0    | 0    | 0    | 0    | 0    | 0    | 0    | 0    | 0    | 0    | 0    | 0    | 0    | 0    | 0    | 0    | 0    | 0    | 0    | 0    | 0    | 0    |
| Veillonella rogosae                        | 0    | 0    | 0    | 0    | 25   | 0    | 0    | 0    | 0    | 0    | 0    | 0    | 0    | 0    | 0    | 0    | 0    | 0    | 0    | 0    | 0    | 0    |
| Actinomyces hongkongensis                  | 0    | 0    | 0    | 0    | 0    | 0    | 0    | 45   | 0    | 0    | 0    | 0    | 0    | 0    | 0    | 0    | 0    | 0    | 0    | 0    | 0    | 0    |
| Veillonella parvula/rogosae                | 0    | 0    | 0    | 0    | 0    | 0    | 0    | 0    | 0    | 0    | 0    | 0    | 0    | 0    | 0    | 0    | 0    | 0    | 0    | 0    | 0    | 0    |
| Anaerococcus provencensis                  | 0    | 0    | 0    | 0    | 0    | 0    | 0    | 0    | 52   | 0    | 0    | 0    | 0    | 0    | 0    | 0    | 0    | 0    | 0    | 0    | 0    | 0    |
| Porphyromonas sp. type 1                   | 0    | 0    | 0    | 0    | 0    | 0    | 0    | 0    | 0    | 0    | 0    | 0    | 0    | 0    | 0    | 0    | 0    | 0    | 0    | 0    | 0    | 0    |
| Brevibacterium paucivorans                 | 0    | 0    | 0    | 0    | 0    | 0    | 0    | 0    | 127  | 0    | 0    | 0    | 0    | 0    | 0    | 0    | 0    | 0    | 0    | 0    | 0    | 0    |
| Peptostreptococcus                         | 0    | 0    | 0    | 0    | 0    | 0    | 0    | 0    | 0    | 0    | 0    | 0    | 0    | 0    | 0    | 0    | 0    | 0    | 0    | 0    | 0    | 0    |
| Facklamia languida                         | 0    | 0    | 0    | 0    | 0    | 0    | 0    | 0    | 0    | 0    | 0    | 0    | 0    | 0    | 0    | 0    | 0    | 0    | 0    | 0    | 0    | 0    |
| Streptobacillus                            | 0    | 0    | 0    | 0    | 0    | 0    | 0    | 0    | 0    | 0    | 0    | 0    | 0    | 0    | 0    | 0    | 0    | 0    | 0    | 0    | 0    | 0    |
| Gemella haemolysans                        | 0    | 0    | 0    | 0    | 0    | 0    | 0    | 0    | 0    | 0    | 0    | 0    | 0    | 0    | 0    | 0    | 0    | 0    | 0    | 0    | 0    | 0    |
| Haemophilus sputorum                       | 0    | 0    | 0    | 0    | 0    | 0    | 0    | 0    | 0    | 0    | 0    | 0    | 0    | 0    | 0    | 0    | 0    | 0    | 0    | 0    | 0    | 0    |
| Actinotignum urinale                       | 0    | 0    | 0    | 0    | 0    | 0    | 0    | 0    | 0    | 0    | 0    | 0    | 0    | 0    | 0    | 0    | 0    | 0    | 0    | 0    | 0    | 0    |
| Dialister pneumosintes                     | 0    | 0    | 0    | 0    | 0    | 0    | 0    | 0    | 0    | 0    | 0    | 0    | 0    | 0    | 0    | 0    | 0    | 0    | 0    | 0    | 0    | 0    |
| Treponema pallidum                         | 0    | 0    | 0    | 0    | 0    | 0    | 0    | 0    | 0    | 0    | 0    | 0    | 0    | 0    | 0    | 0    | 0    | 0    | 0    | 0    | 0    | 0    |
| Porphyromonas bennonis                     | 0    | 0    | 0    | 0    | 0    | 0    | 0    | 0    | 0    | 0    | 0    | 0    | 0    | 0    | 0    | 0    | 0    | 0    | 0    | 0    | 0    | 0    |
| Bergeyella                                 | 0    | 0    | 0    | 0    | 0    | 0    | 0    | 149  | 0    | 0    | 0    | 0    | 0    | 0    | 0    | 0    | 0    | 0    | 0    | 0    | 0    | 0    |
| Actinotignum schaalii/timonense            | 0    | 0    | 0    | 0    | 0    | 0    | 0    | 0    | 0    | 0    | 0    | 0    | 42   | 0    | 0    | 0    | 0    | 0    | 0    | 0    | 0    | 0    |
| Klebsiella aerogenes/Kluyvera cryocrescens | 0    | 0    | 0    | 0    | 0    | 0    | 0    | 0    | 0    | 0    | 0    | 0    | 0    | 0    | 0    | 0    | 0    | 0    | 0    | 0    | 0    | 0    |
| Rothia mucilaginosa                        | 0    | 0    | 0    | 0    | 68   | 0    | 0    | 0    | 0    | 0    | 0    | 0    | 0    | 0    | 0    | 0    | 0    | 0    | 0    | 0    | 0    | 0    |
| Solobacterium moorei                       | 0    | 0    | 0    | 0    | 0    | 0    | 0    | 0    | 0    | 0    | 0    | 0    | 0    | 0    | 0    | 0    | 0    | 0    | 0    | 0    | 0    | 0    |
| Mageeibacillus indolicus                   | 0    | 0    | 0    | 0    | 0    | 0    | 0    | 0    | 0    | 0    | 0    | 0    | 0    | 0    | 0    | 0    | 0    | 0    | 0    | 0    | 0    | 0    |
| Serratia urelytica                         | 0    | 0    | 0    | 0    | 0    | 0    | 0    | 0    | 0    | 0    | 0    | 0    | 0    | 0    | 0    | 0    | 0    | 0    | 0    | 0    | 0    | 0    |
| Peptoniphilus obesi                        | 0    | 0    | 0    | 0    | 0    | 0    | 0    | 0    | 0    | 0    | 0    | 0    | 0    | 0    | 0    | 0    | 0    | 0    | 0    | 0    | 0    | 0    |
| Peptoniphilus harei/phoceensis             | 0    | 0    | 0    | 0    | 0    | 0    | 0    | 0    | 0    | 0    | 0    | 0    | 0    | 0    | 0    | 0    | 0    | 0    | 0    | 0    | 0    | 0    |
| Corynebacterium atypicum                   | 0    | 112  | 0    | 0    | 0    | 0    | 0    | 0    | 0    | 0    | 0    | 0    | 0    | 0    | 0    | 0    | 0    | 0    | 0    | 0    | 0    | 0    |
| Atopobium minutum                          | 0    | 0    | 0    | 0    | 0    | 0    | 0    | 0    | 0    | 0    | 0    | 0    | 0    | 0    | 0    | 0    | 0    | 0    | 0    | 0    | 0    | 0    |
| Corynebacterium genitalium                 | 0    | 0    | 0    | 0    | 0    | 0    | 0    | 0    | 50   | 0    | 0    | 0    | 0    | 0    | 0    | 0    | 0    | 0    | 0    | 0    | 0    | 0    |
| Bifidobacterium tsurumiense                | 0    | 0    | 0    | 0    | 0    | 0    | 0    | 0    | 0    | 0    | 0    | 0    | 0    | 0    | 0    | 0    | 0    | 0    | 0    | 0    | 0    | 0    |
| Micrococcus                                | 0    | 0    | 0    | 0    | 0    | 0    | 0    | 0    | 0    | 0    | 0    | 0    | 0    | 0    | 0    | 0    | 0    | 0    | 0    | 0    | 0    | 0    |
| Megasphaera genomsp. type_1                | 0    | 0    | 0    | 0    | 0    | 0    | 0    | 109  | 0    | 0    | 0    | 0    | 0    | 0    | 0    | 0    | 0    | 0    | 0    | 0    | 0    | 0    |
| Enhydrobacter                              | 0    | 0    | 0    | 0    | 0    | 0    | 0    | 0    | 0    | 0    | 0    | 62   | 0    | 0    | 0    | 0    | 0    | 0    | 0    | 0    | 0    | 0    |
| Fastidiosipila sanguinis                   | 0    | 0    | 0    | 0    | 0    | 0    | 0    | 0    | 0    | 0    | 0    | 0    | 0    | 0    | 0    | 0    | 0    | 0    | 0    | 0    | 0    | 0    |
| Prevotellamassilia                         | 0    | 0    | 0    | 0    | 0    | 0    | 0    | 0    | 0    | 0    | 0    | 0    | 0    | 0    | 0    | 0    | 0    | 0    | 0    | 0    | 0    | 0    |
| Peptostreptococcaceae                      | 0    | 0    | 0    | 0    | 0    | 0    | 0    | 0    | 0    | 0    | 0    | 0    | 0    | 0    | 0    | 0    | 0    | 0    | 0    | 0    | 0    | 0    |
| Morganella morganii                        | 0    | 0    | 0    | 0    | 0    | 0    | 0    | 0    | 0    | 0    | 0    | 0    | 0    | 0    | 0    | 0    | 0    | 0    | 0    | 0    | 0    | 0    |
| Neofamilia                                 | 0    | 0    | 0    | 0    | 0    | 0    | 0    | 0    | 0    | 0    | 0    | 0    | 0    | 0    | 0    | 0    | 0    | 0    | 0    | 0    | 0    | 0    |
| Pseudoclavibacter bifida                   | 0    | 0    | 0    | 0    | 0    | 0    | 0    | 0    | 49   | 0    | 0    | 0    | 0    | 0    | 0    | 0    | 0    | 0    | 0    | 0    | 0    | 0    |
| Helcococcus                                | 0    | 0    | 0    | 0    | 0    | 0    | 0    | 0    | 0    | 0    | 0    | 0    | 0    | 0    | 0    | 0    | 0    | 0    | 0    | 0    | 0    | 0    |
| Brevibacterium ravenspurgense              | 0    | 0    | 0    | 0    | 0    | 0    | 0    | 0    | 0    | 0    | 0    | 0    | 0    | 0    | 0    | 0    | 0    | 0    | 0    | 0    | 0    | 126  |
| Moryella indoligenes                       | 0    | 0    | 0    | 0    | 0    | 0    | 0    | 0    | 0    | 0    | 0    | 0    | 0    | 0    | 0    | 0    | 0    | 0    | 0    | 0    | 0    | 0    |
| Olegusella massiliensis                    | 0    | 0    | 0    | 0    | 0    | 0    | 0    | 0    | 0    | 0    | 0    | 0    | 0    | 0    | 0    | 0    | 0    | 0    | 0    | 0    | 0    | 0    |
| Morococcus cerebrosus                      | 0    | 0    | 0    | 0    | 0    | 0    | 0    | 0    | 0    | 0    | 0    | 0    | 0    | 0    | 0    | 0    | 0    | 0    | 0    | 0    | 0    | 0    |
| Prevotella scopos                          | 0    | 0    | 0    | 0    | 0    | 0    | 0    | 0    | 0    | 0    | 0    | 0    | 0    | 0    | 0    | 0    | 0    | 0    | 0    | 0    | 0    | 0    |
| Veillonella parvula/tobetsuensis           | 0    | 0    | 0    | 0    | 0    | 0    | 0    | 0    | 0    | 0    | 0    | 0    | 0    | 0    | 0    | 0    | 0    | 0    | 0    | 0    | 0    | 0    |
| Moryella                                   | 0    | 0    | 0    | 0    | 0    | 0    | 0    | 0    | 0    | 0    | 0    | 0    | 0    | 0    | 0    | 0    | 0    | 0    | 0    | 0    | 0    | 0    |
| Atopobium parvulum                         | 0    | 0    | 0    | 0    | 0    | 0    | 0    | 0    | 0    | 0    | 0    | 0    | 0    | 0    | 0    | 0    | 0    | 0    | 0    | 0    | 0    | 0    |
| Serratia marcescens                        | 0    | 0    | 0    | 0    | 0    | 0    | 0    | 0    | 0    | 0    | 0    | 0    | 0    | 0    | 0    | 0    | 0    | 0    | 0    | 0    | 0    | 0    |
| Collinsella aerofaciens                    | 0    | 0    | 0    | 0    | 0    | 0    | 0    | 0    | 0    | 0    | 0    | 0    | 0    | 0    | 0    | 0    | 0    | 0    | 0    | 0    | 0    | 0    |
| Curvibacter                                | 0    | 0    | 0    | 0    | 0    | 0    | 0    | 0    | 0    | 0    | 0    | 0    | 0    | 0    | 0    | 0    | 0    | 0    | 0    | 0    | 0    | 0    |
| Rothia dentocariosa                        | 0    | 0    | 0    | 0    | 0    | 0    | 0    | 0    | 0    | 0    | 0    | 0    | 0    | 0    | 0    | 0    | 0    | 0    | 0    | 0    | 0    | 0    |
| Prevotella bergensis                       | 0    | 0    | 0    | 0    | 0    | 0    | 0    | 0    | 0    | 0    | 0    | 0    | 0    | 0    | 0    | 0    | 0    | 0    | 0    | 0    | 0    | 0    |
| Corynebacterium sundsvallense              | 0    | 0    | 0    | 0    | 0    | 0    | 0    | 0    | 0    | 0    | 0    | 0    | 0    | 0    | 0    | 0    | 0    | 0    | 0    | 0    | 0    | 0    |

Samples S226 - S253

| Species                                       | S226 | S227 | S229 | S230 | S231 | S232 | S233 | S235 | S236 | S238 | S239 | S241 | S243 | S244 | S245 | S246 | S247 | S249 | S250 | S251 | S252 | S253 |
|-----------------------------------------------|------|------|------|------|------|------|------|------|------|------|------|------|------|------|------|------|------|------|------|------|------|------|
| Coriobacteria                                 | 0    | 0    | 0    | 0    | 0    | 0    | 0    | 0    | 0    | 0    | 0    | 0    | 0    | 0    | 0    | 0    | 0    | 0    | 0    | 0    | 0    | 0    |
| Neisseria meningitidis                        | 0    | 0    | 0    | 0    | 39   | 0    | 0    | 0    | 0    | 0    | 0    | 0    | 0    | 0    | 0    | 0    | 0    | 0    | 0    | 0    | 0    | 0    |
| Dermacoccus nishinomiyaensis                  | 0    | 0    | 0    | 0    | 0    | 0    | 0    | 0    | 0    | 0    | 0    | 184  | 0    | 0    | 0    | 0    | 0    | 0    | 0    | 0    | 0    | 0    |
| Leptotrichia                                  | 0    | 0    | 0    | 0    | 0    | 0    | 0    | 0    | 0    | 0    | 0    | 0    | 0    | 0    | 0    | 0    | 0    | 0    | 0    | 0    | 0    | 0    |
| Microbacteriaceae                             | 0    | 0    | 0    | 0    | 0    | 0    | 0    | 0    | 31   | 0    | 0    | 0    | 0    | 0    | 0    | 0    | 0    | 0    | 0    | 0    | 0    | 0    |
| Klebsiella pneumoniae/variiicola              | 0    | 0    | 0    | 0    | 0    | 0    | 0    | 0    | 0    | 0    | 0    | 0    | 0    | 0    | 0    | 0    | 0    | 0    | 0    | 0    | 0    | 0    |
| Hafnia alvei                                  | 0    | 0    | 0    | 0    | 0    | 0    | 0    | 0    | 0    | 0    | 0    | 0    | 0    | 0    | 0    | 0    | 0    | 0    | 0    | 0    | 0    | 0    |
| Caulobacter                                   | 0    | 0    | 0    | 0    | 0    | 0    | 0    | 0    | 0    | 0    | 0    | 0    | 0    | 0    | 0    | 0    | 0    | 0    | 0    | 0    | 0    | 0    |
| Lactobacillus reuteri                         | 0    | 0    | 0    | 0    | 0    | 0    | 0    | 0    | 0    | 0    | 0    | 0    | 0    | 0    | 0    | 0    | 0    | 0    | 0    | 0    | 0    | 0    |
| Gemella morbillorum                           | 0    | 0    | 0    | 0    | 0    | 0    | 0    | 0    | 0    | 0    | 0    | 0    | 0    | 0    | 0    | 0    | 0    | 0    | 0    | 0    | 0    | 0    |
| Rothia                                        | 0    | 0    | 0    | 0    | 0    | 0    | 0    | 0    | 0    | 0    | 0    | 0    | 0    | 0    | 0    | 0    | 0    | 0    | 0    | 0    | 0    | 0    |
| Campylobacter                                 | 0    | 0    | 0    | 0    | 0    | 0    | 0    | 0    | 0    | 0    | 0    | 0    | 0    | 0    | 0    | 0    | 0    | 49   | 0    | 0    | 0    | 0    |
| Prevotella genogroup 3                        | 0    | 0    | 0    | 0    | 0    | 0    | 0    | 59   | 0    | 0    | 0    | 0    | 0    | 0    | 0    | 0    | 0    | 0    | 0    | 0    | 0    | 0    |
| Staphylococcus warneri                        | 0    | 0    | 0    | 0    | 0    | 0    | 0    | 0    | 0    | 0    | 0    | 0    | 0    | 0    | 0    | 0    | 0    | 0    | 0    | 0    | 0    | 0    |
| Blautia wexlerae                              | 0    | 0    | 0    | 0    | 0    | 0    | 0    | 0    | 0    | 0    | 0    | 0    | 0    | 0    | 0    | 0    | 0    | 0    | 0    | 0    | 0    | 0    |
| Lachnoanaerobaculum                           | 0    | 0    | 0    | 0    | 0    | 0    | 0    | 0    | 0    | 0    | 0    | 0    | 0    | 0    | 0    | 0    | 0    | 0    | 0    | 0    | 0    | 0    |
| Anaerococcus hydrogenalis/senegalensis        | 0    | 0    | 0    | 0    | 0    | 0    | 0    | 0    | 0    | 0    | 0    | 0    | 0    | 0    | 0    | 0    | 0    | 0    | 0    | 0    | 0    | 0    |
| Brevibacterium mcbrellneri                    | 0    | 0    | 0    | 0    | 0    | 0    | 0    | 0    | 0    | 0    | 0    | 0    | 0    | 0    | 0    | 0    | 0    | 0    | 0    | 0    | 0    | 0    |
| Corynebacterium glaucum                       | 0    | 0    | 0    | 0    | 0    | 0    | 0    | 0    | 0    | 0    | 0    | 0    | 0    | 0    | 0    | 0    | 0    | 0    | 0    | 0    | 0    | 0    |
| Prevotella salivae                            | 0    | 0    | 0    | 0    | 0    | 0    | 0    | 0    | 0    | 0    | 0    | 0    | 0    | 0    | 0    | 0    | 0    | 0    | 0    | 0    | 0    | 0    |
| Coriobacteriaceae                             | 0    | 0    | 0    | 0    | 0    | 0    | 0    | 0    | 0    | 0    | 0    | 0    | 0    | 0    | 0    | 0    | 0    | 0    | 0    | 0    | 0    | 0    |
| Bulleidia                                     | 0    | 0    | 0    | 0    | 0    | 0    | 0    | 0    | 0    | 0    | 0    | 0    | 0    | 0    | 0    | 0    | 0    | 0    | 0    | 0    | 0    | 0    |
| Peptococcus                                   | 0    | 0    | 0    | 0    | 0    | 0    | 0    | 0    | 0    | 43   | 0    | 0    | 0    | 0    | 0    | 0    | 0    | 0    | 0    | 0    | 0    | 0    |
| Serratia marcescens/nematodiphila             | 0    | 0    | 0    | 0    | 0    | 0    | 0    | 0    | 0    | 0    | 0    | 0    | 0    | 0    | 0    | 0    | 0    | 0    | 0    | 0    | 0    | 0    |
| Leptotrichia wadei                            | 0    | 0    | 0    | 0    | 0    | 0    | 0    | 0    | 0    | 0    | 0    | 0    | 0    | 0    | 0    | 0    | 0    | 0    | 0    | 0    | 0    | 0    |
| Neisseriaceae                                 | 0    | 0    | 0    | 0    | 0    | 0    | 0    | 0    | 0    | 0    | 0    | 0    | 0    | 0    | 0    | 0    | 0    | 0    | 0    | 0    | 0    | 0    |
| Aerococcus sanguinicola                       | 0    | 0    | 0    | 0    | 0    | 0    | 0    | 0    | 0    | 0    | 0    | 0    | 0    | 0    | 0    | 0    | 0    | 0    | 0    | 0    | 0    | 0    |
| Criobacterium bergeronii                      | 0    | 0    | 0    | 0    | 0    | 0    | 0    | 0    | 0    | 0    | 0    | 0    | 0    | 0    | 0    | 0    | 0    | 0    | 0    | 0    | 0    | 0    |
| Brevibacterium luteolum                       | 0    | 0    | 0    | 0    | 0    | 0    | 0    | 0    | 0    | 0    | 0    | 0    | 0    | 0    | 0    | 0    | 0    | 0    | 0    | 0    | 0    | 0    |
| Klebsiella pneumoniae                         | 0    | 0    | 0    | 0    | 0    | 0    | 0    | 0    | 0    | 0    | 0    | 0    | 0    | 0    | 0    | 0    | 0    | 0    | 0    | 0    | 0    | 0    |
| Actinomyces oris/viscosus                     | 0    | 0    | 0    | 0    | 0    | 0    | 0    | 0    | 0    | 0    | 0    | 0    | 0    | 0    | 0    | 0    | 0    | 0    | 0    | 0    | 0    | 0    |
| Mycobacterium chelonae complex                | 0    | 0    | 0    | 0    | 0    | 0    | 0    | 0    | 0    | 0    | 0    | 0    | 0    | 0    | 0    | 0    | 0    | 0    | 0    | 0    | 0    | 0    |
| Corynebacterium jeddahense                    | 0    | 0    | 0    | 0    | 0    | 0    | 0    | 34   | 0    | 0    | 0    | 0    | 0    | 0    | 0    | 0    | 0    | 0    | 0    | 0    | 0    | 0    |
| Peptostreptococcus stomatis                   | 0    | 0    | 0    | 0    | 0    | 0    | 0    | 0    | 0    | 0    | 0    | 0    | 0    | 0    | 0    | 0    | 0    | 0    | 0    | 0    | 0    | 0    |
| Megasphaera                                   | 0    | 0    | 0    | 0    | 0    | 262  | 0    | 0    | 0    | 0    | 0    | 0    | 0    | 0    | 0    | 0    | 0    | 0    | 0    | 0    | 0    | 0    |
| Campylobacter rectus/showae                   | 0    | 0    | 0    | 0    | 0    | 0    | 0    | 0    | 0    | 46   | 0    | 0    | 0    | 0    | 0    | 0    | 0    | 0    | 0    | 0    | 0    | 0    |
| Staphylococcus carnosus/condimenti            | 0    | 0    | 0    | 0    | 0    | 0    | 0    | 0    | 0    | 0    | 0    | 0    | 0    | 0    | 0    | 0    | 0    | 0    | 0    | 0    | 0    | 0    |
| Prevotella pallens                            | 0    | 0    | 0    | 0    | 0    | 0    | 0    | 0    | 0    | 0    | 0    | 0    | 0    | 0    | 0    | 0    | 0    | 0    | 0    | 0    | 0    | 0    |
| Prolinoborus fasciculus/Acinetobacter lwoffii | 0    | 0    | 0    | 0    | 0    | 0    | 0    | 0    | 0    | 0    | 0    | 0    | 0    | 0    | 0    | 0    | 0    | 0    | 0    | 0    | 0    | 0    |
| Staphylococcus nepalensis                     | 0    | 0    | 0    | 0    | 0    | 0    | 0    | 0    | 0    | 0    | 0    | 0    | 0    | 0    | 0    | 0    | 0    | 0    | 0    | 0    | 0    | 0    |
| Staphylococcaceae                             | 0    | 0    | 0    | 0    | 0    | 0    | 0    | 0    | 0    | 0    | 0    | 0    | 0    | 0    | 0    | 0    | 0    | 0    | 0    | 0    | 0    | 0    |
| Cruoricaptor                                  | 0    | 0    | 0    | 0    | 0    | 0    | 0    | 250  | 0    | 0    | 0    | 0    | 0    | 0    | 0    | 0    | 0    | 0    | 0    | 0    | 0    | 0    |
| [Eubacterium] hallii                          | 0    | 0    | 0    | 0    | 0    | 0    | 0    | 0    | 0    | 0    | 0    | 0    | 0    | 0    | 0    | 0    | 0    | 0    | 0    | 0    | 0    | 0    |
| BVAB1 (species)                               | 0    | 0    | 0    | 0    | 0    | 0    | 0    | 0    | 0    | 0    | 0    | 0    | 0    | 0    | 0    | 0    | 0    | 0    | 0    | 0    | 0    | 0    |
| Stomatobaculum                                | 0    | 0    | 0    | 0    | 0    | 0    | 0    | 0    | 0    | 0    | 0    | 0    | 0    | 0    | 0    | 0    | 0    | 0    | 0    | 0    | 0    | 0    |
| Mycoplasma                                    | 0    | 0    | 0    | 0    | 0    | 0    | 0    | 0    | 0    | 0    | 0    | 0    | 0    | 0    | 0    | 0    | 0    | 0    | 0    | 0    | 0    | 0    |
| Catenibacterium mitsuokai                     | 0    | 0    | 0    | 0    | 0    | 0    | 0    | 0    | 0    | 0    | 0    | 0    | 0    | 0    | 0    | 0    | 0    | 0    | 0    | 0    | 0    | 0    |
| Veillonella parvula                           | 0    | 0    | 0    | 0    | 0    | 0    | 0    | 0    | 0    | 0    | 0    | 0    | 0    | 0    | 0    | 0    | 0    | 0    | 0    | 0    | 0    | 0    |
| Corynebacterium kroppenstedtii                | 0    | 0    | 0    | 0    | 0    | 0    | 0    | 56   | 0    | 0    | 0    | 0    | 0    | 0    | 0    | 0    | 0    | 0    | 0    | 0    | 0    | 0    |
| Eremococcus coleocola                         | 0    | 0    | 0    | 0    | 0    | 0    | 0    | 0    | 0    | 0    | 0    | 0    | 0    | 0    | 0    | 0    | 0    | 0    | 0    | 0    | 0    | 0    |
| Actinomyces europaeus                         | 0    | 0    | 0    | 0    | 0    | 0    | 0    | 0    | 0    | 0    | 0    | 0    | 0    | 0    | 0    | 0    | 0    | 0    | 0    | 0    | 0    | 0    |
| Peptoniphilus senegalensis                    | 0    | 0    | 0    | 0    | 0    | 0    | 0    | 0    | 0    | 0    | 0    | 0    | 0    | 0    | 0    | 0    | 0    | 0    | 0    | 0    | 0    | 0    |
| Corynebacterium afermentans/humii             | 0    | 0    | 0    | 0    | 0    | 0    | 0    | 0    | 0    | 0    | 0    | 0    | 0    | 0    | 0    | 0    | 0    | 0    | 0    | 0    | 0    | 0    |
| Acinetobacter                                 | 0    | 0    | 0    | 0    | 0    | 0    | 0    | 0    | 0    | 0    | 0    | 0    | 0    | 0    | 0    | 0    | 0    | 0    | 0    | 0    | 0    | 0    |
| Eggerthellaceae                               | 0    | 0    | 0    | 0    | 0    | 0    | 0    | 0    | 0    | 0    | 0    | 0    | 0    | 0    | 0    | 0    | 0    | 0    | 0    | 0    | 0    | 0    |
| Corynebacterium mucifaciens                   | 0    | 0    | 0    | 0    | 0    | 0    | 0    | 0    | 0    | 0    | 0    | 0    | 40   | 0    | 0    | 0    | 0    | 0    | 0    | 0    | 0    | 0    |
| Filifactor                                    | 0    | 0    | 0    | 0    | 0    | 0    | 0    | 0    | 0    | 0    | 0    | 0    | 0    | 0    | 0    | 0    | 0    | 0    | 0    | 0    | 0    | 0    |
| Ruminococcus faecis                           | 0    | 0    | 0    | 0    | 0    | 0    | 0    | 0    | 0    | 0    | 0    | 0    | 0    | 0    | 0    | 0    | 0    | 0    | 0    | 0    | 0    | 0    |
| Lactobacillus                                 | 0    | 0    | 0    | 0    | 0    | 0    | 0    | 0    | 0    | 0    | 0    | 0    | 0    | 0    | 0    | 0    | 0    | 0    | 0    | 0    | 0    | 0    |
| Peptoniphilus grossensis/rhinitidis           | 0    | 0    | 0    | 0    | 0    | 0    | 0    | 0    | 0    | 0    | 0    | 0    | 0    | 0    | 0    | 0    | 0    | 0    | 0    | 0    | 0    | 0    |
| Aerococcus urinaequi/viridans                 | 0    | 0    | 0    | 0    | 0    | 0    | 0    | 0    | 0    | 0    | 0    | 0    | 0    | 0    | 0    | 0    | 0    | 0    | 0    | 0    | 0    | 0    |
| Anaerostipes hadrus                           | 0    | 0    | 0    | 0    | 0    | 0    | 0    | 0    | 0    | 0    | 0    | 0    | 0    | 0    | 0    | 0    | 0    | 0    | 0    | 0    | 0    | 0    |
| Lagierella                                    | 0    | 0    | 0    | 0    | 0    | 0    | 0    | 0    | 0    | 0    | 0    | 0    | 0    | 0    | 0    | 0    | 0    | 0    | 0    | 0    | 0    | 0    |
| Neisseria cinerea/meningitidis                | 0    | 0    | 0    | 0    | 0    | 0    | 0    | 0    | 0    | 0    | 0    | 0    | 0    | 0    | 0    | 0    | 0    | 0    | 0    | 0    | 0    | 0    |
| Micrococcus lylae                             | 0    | 0    | 0    | 0    | 0    | 0    | 0    | 0    | 0    | 0    | 0    | 0    | 0    | 0    | 0    | 0    | 0    | 0    | 0    | 0    | 0    | 0    |
| Staphylococcus cohnii                         | 0    | 0    | 0    | 0    | 0    | 0    | 0    | 0    | 0    | 0    | 0    | 0    | 0    | 0    | 0    | 0    | 0    | 0    | 0    | 0    | 0    | 0    |
| Casaltella massiliensis                       | 0    | 0    | 0    | 0    | 0    | 0    | 0    | 0    | 0    | 0    | 0    | 0    | 0    | 0    | 0    | 0    | 0    | 0    | 0    | 0    | 0    | 0    |
| Stomatobaculum longum                         | 0    | 0    | 0    | 0    | 0    | 0    | 0    | 0    | 0    | 0    | 0    | 0    | 0    | 0    | 0    | 0    | 0    | 0    | 0    | 0    | 0    | 0    |
| Lautropia                                     | 0    | 0    | 0    | 0    | 0    | 0    | 0    | 0    | 0    | 0    | 0    | 0    | 0    | 0    | 0    | 0    | 0    | 0    | 0    | 0    | 0    | 0    |
| Fastidiosipila                                | 0    | 0    | 0    | 0    | 0    | 0    | 0    | 0    | 0    | 0    | 0    | 0    | 0    | 0    | 0    | 0    | 0    | 0    | 0    | 0    | 0    | 0    |

Samples S226 - S253

| Species                                      | S226 | S227 | S229 | S230 | S231 | S232 | S233 | S235 | S236 | S238 | S239 | S241 | S243 | S244 | S245 | S246 | S247 | S249 | S250 | S251 | S252 | S253 |
|----------------------------------------------|------|------|------|------|------|------|------|------|------|------|------|------|------|------|------|------|------|------|------|------|------|------|
| Corynebacterium durum                        | 0    | 0    | 0    | 0    | 0    | 0    | 0    | 0    | 0    | 0    | 0    | 0    | 0    | 0    | 0    | 0    | 0    | 0    | 0    | 0    | 0    | 0    |
| Actinomyces graevenitzii                     | 0    | 0    | 0    | 0    | 0    | 0    | 0    | 0    | 0    | 0    | 0    | 0    | 0    | 0    | 0    | 0    | 0    | 0    | 0    | 0    | 0    | 0    |
| Staphylococcus cohnii/saprophyticus          | 0    | 0    | 0    | 0    | 0    | 0    | 0    | 0    | 0    | 0    | 0    | 0    | 0    | 0    | 0    | 0    | 0    | 0    | 0    | 0    | 0    | 0    |
| Leptotrichia trevisanii                      | 0    | 0    | 0    | 0    | 0    | 0    | 0    | 0    | 0    | 131  | 0    | 0    | 0    | 0    | 0    | 0    | 0    | 0    | 0    | 0    | 0    | 0    |
| Candidatus Paraburkholderia calva            | 0    | 0    | 0    | 0    | 0    | 99   | 0    | 0    | 0    | 0    | 0    | 0    | 0    | 0    | 0    | 0    | 0    | 0    | 0    | 0    | 0    | 0    |
| Actinomyces urogenitalis                     | 0    | 0    | 0    | 0    | 0    | 0    | 0    | 0    | 0    | 0    | 0    | 0    | 0    | 0    | 0    | 0    | 0    | 0    | 0    | 0    | 0    | 0    |
| Clostridiales                                | 0    | 0    | 0    | 0    | 0    | 0    | 0    | 0    | 0    | 0    | 0    | 0    | 0    | 0    | 0    | 0    | 0    | 0    | 0    | 0    | 0    | 0    |
| Pasteurella caballi                          | 0    | 0    | 0    | 0    | 0    | 0    | 0    | 0    | 0    | 0    | 0    | 0    | 0    | 0    | 0    | 0    | 0    | 0    | 0    | 0    | 0    | 0    |
| Fusobacterium hwasookii/nucleatum            | 0    | 0    | 0    | 0    | 0    | 0    | 0    | 0    | 0    | 0    | 0    | 0    | 0    | 0    | 0    | 0    | 0    | 0    | 0    | 0    | 0    | 0    |
| Corynebacterium riegelii                     | 0    | 0    | 0    | 0    | 0    | 0    | 0    | 0    | 0    | 0    | 0    | 0    | 0    | 0    | 0    | 0    | 0    | 0    | 0    | 0    | 0    | 0    |
| Hafnia                                       | 0    | 0    | 0    | 0    | 0    | 0    | 0    | 0    | 0    | 0    | 0    | 0    | 0    | 0    | 0    | 0    | 0    | 0    | 0    | 0    | 0    | 0    |
| Staphylococcus equorum/saprophyticus/xylosum | 0    | 0    | 0    | 0    | 0    | 0    | 0    | 0    | 0    | 0    | 0    | 0    | 0    | 0    | 0    | 0    | 0    | 0    | 0    | 0    | 0    | 0    |
| Acinetobacter lwoffii                        | 0    | 0    | 0    | 0    | 0    | 0    | 0    | 0    | 0    | 0    | 0    | 0    | 0    | 0    | 0    | 0    | 0    | 0    | 0    | 0    | 0    | 0    |
| Micrococcus cohnii                           | 0    | 0    | 0    | 0    | 0    | 0    | 0    | 0    | 0    | 0    | 0    | 0    | 0    | 0    | 0    | 0    | 0    | 0    | 0    | 0    | 0    | 0    |
| Pseudoclavibacter faecalis                   | 0    | 0    | 0    | 0    | 0    | 0    | 0    | 0    | 0    | 0    | 0    | 0    | 0    | 0    | 0    | 0    | 0    | 0    | 0    | 0    | 0    | 0    |
| Leptotrichia buccalis                        | 0    | 0    | 0    | 0    | 0    | 0    | 0    | 0    | 0    | 0    | 0    | 0    | 0    | 0    | 0    | 0    | 0    | 0    | 0    | 0    | 0    | 0    |
| Actinomyces                                  | 0    | 0    | 0    | 0    | 25   | 0    | 0    | 0    | 0    | 0    | 0    | 0    | 0    | 0    | 0    | 0    | 0    | 0    | 0    | 0    | 0    | 0    |
| Fusobacterium nucleatum/periodonticum        | 0    | 0    | 0    | 0    | 0    | 0    | 0    | 0    | 0    | 0    | 0    | 0    | 0    | 0    | 0    | 0    | 0    | 0    | 0    | 0    | 0    | 0    |
| Lactobacillus saerimneri                     | 0    | 0    | 0    | 0    | 0    | 0    | 0    | 0    | 0    | 0    | 0    | 0    | 0    | 0    | 0    | 0    | 0    | 0    | 0    | 0    | 0    | 0    |
| Actinomycetaceae                             | 0    | 0    | 0    | 0    | 0    | 0    | 0    | 0    | 0    | 0    | 0    | 0    | 0    | 0    | 0    | 0    | 0    | 0    | 0    | 0    | 0    | 0    |
| Dialister                                    | 0    | 0    | 0    | 0    | 0    | 0    | 0    | 0    | 0    | 0    | 0    | 0    | 0    | 0    | 0    | 0    | 0    | 0    | 0    | 0    | 0    | 0    |
| Neisseria mucosa/subflava                    | 0    | 0    | 0    | 0    | 30   | 0    | 0    | 0    | 0    | 0    | 0    | 0    | 0    | 0    | 0    | 0    | 0    | 0    | 0    | 0    | 0    | 0    |
| Paracoccus                                   | 0    | 0    | 0    | 0    | 0    | 0    | 0    | 0    | 0    | 0    | 0    | 0    | 0    | 0    | 0    | 0    | 0    | 0    | 0    | 0    | 0    | 0    |
| Acinetobacter haemolyticus/johnsonii         | 0    | 0    | 0    | 0    | 0    | 0    | 0    | 0    | 0    | 0    | 0    | 0    | 0    | 0    | 0    | 0    | 0    | 0    | 0    | 0    | 0    | 0    |
| Neisseria subflava                           | 0    | 0    | 0    | 0    | 0    | 0    | 0    | 0    | 0    | 0    | 0    | 0    | 0    | 0    | 0    | 0    | 0    | 0    | 0    | 0    | 0    | 0    |
| Acinetobacter proteolyticus                  | 0    | 0    | 0    | 0    | 0    | 0    | 0    | 0    | 0    | 0    | 0    | 0    | 0    | 0    | 0    | 0    | 0    | 0    | 0    | 0    | 0    | 0    |
| Dorea formicigenerans                        | 0    | 0    | 0    | 0    | 0    | 0    | 0    | 0    | 0    | 0    | 0    | 0    | 0    | 0    | 0    | 0    | 0    | 0    | 0    | 0    | 0    | 0    |
| Corynebacterium tuscaniense                  | 0    | 0    | 0    | 0    | 0    | 0    | 0    | 0    | 0    | 0    | 0    | 0    | 0    | 0    | 0    | 0    | 0    | 0    | 0    | 0    | 0    | 0    |
| Massiliomicrobiota timonensis                | 0    | 0    | 0    | 0    | 0    | 0    | 0    | 0    | 0    | 0    | 0    | 0    | 0    | 0    | 0    | 0    | 0    | 0    | 0    | 0    | 0    | 0    |
| Fusobacterium hwasookii                      | 0    | 0    | 0    | 0    | 0    | 0    | 0    | 0    | 0    | 0    | 0    | 0    | 0    | 0    | 0    | 0    | 0    | 0    | 0    | 0    | 0    | 0    |
| Pseudoglutamicibacter albus                  | 0    | 0    | 0    | 0    | 0    | 0    | 0    | 0    | 0    | 0    | 0    | 0    | 0    | 0    | 0    | 0    | 0    | 0    | 0    | 0    | 0    | 0    |
| Clostridiales Family XIII. Incertae Sedis    | 0    | 0    | 0    | 0    | 0    | 0    | 0    | 0    | 0    | 0    | 0    | 0    | 0    | 0    | 0    | 0    | 0    | 0    | 0    | 0    | 0    | 0    |
| Kocuria marina/rhizophila                    | 0    | 0    | 0    | 0    | 0    | 0    | 0    | 0    | 0    | 0    | 0    | 0    | 0    | 0    | 0    | 0    | 0    | 0    | 0    | 0    | 0    | 0    |
| Kocuria                                      | 0    | 0    | 0    | 0    | 0    | 0    | 0    | 0    | 0    | 0    | 0    | 0    | 0    | 0    | 0    | 0    | 0    | 0    | 0    | 0    | 0    | 0    |
| Alloprevotella rava                          | 0    | 0    | 0    | 0    | 0    | 0    | 0    | 0    | 0    | 0    | 0    | 0    | 0    | 0    | 0    | 0    | 0    | 0    | 0    | 0    | 0    | 0    |
| Staphylococcus pettenkoferi                  | 0    | 0    | 0    | 0    | 0    | 0    | 0    | 0    | 0    | 0    | 0    | 0    | 0    | 0    | 0    | 0    | 0    | 0    | 0    | 0    | 0    | 0    |
| Streptococcus pseudoporcinus                 | 0    | 0    | 0    | 0    | 0    | 0    | 0    | 0    | 0    | 0    | 0    | 0    | 0    | 0    | 0    | 0    | 0    | 0    | 0    | 0    | 0    | 0    |
| Kingella                                     | 0    | 0    | 0    | 0    | 0    | 0    | 0    | 0    | 0    | 0    | 0    | 0    | 0    | 0    | 0    | 0    | 0    | 0    | 0    | 0    | 0    | 0    |
| Eikenella                                    | 0    | 0    | 0    | 0    | 0    | 0    | 0    | 0    | 0    | 0    | 0    | 0    | 0    | 0    | 0    | 0    | 0    | 0    | 0    | 0    | 0    | 0    |
| Actinomyces odontolyticus                    | 0    | 0    | 0    | 0    | 0    | 0    | 0    | 0    | 0    | 0    | 0    | 0    | 0    | 0    | 0    | 0    | 0    | 0    | 0    | 0    | 0    | 0    |
| Corynebacterium sphenisci                    | 0    | 0    | 0    | 0    | 0    | 0    | 0    | 0    | 0    | 0    | 0    | 0    | 0    | 0    | 0    | 0    | 0    | 0    | 0    | 0    | 0    | 0    |
| Cutibacterium                                | 0    | 0    | 0    | 0    | 0    | 0    | 0    | 0    | 0    | 0    | 0    | 0    | 0    | 0    | 0    | 0    | 0    | 0    | 0    | 0    | 0    | 0    |
| Staphylococcus xylosum                       | 0    | 0    | 0    | 0    | 0    | 0    | 0    | 0    | 0    | 0    | 0    | 0    | 0    | 0    | 0    | 0    | 0    | 0    | 0    | 0    | 0    | 0    |
| Burkholderiales                              | 0    | 0    | 0    | 0    | 0    | 0    | 0    | 0    | 0    | 0    | 0    | 0    | 0    | 0    | 0    | 0    | 0    | 0    | 0    | 0    | 0    | 0    |
| Massiliomicrobiota/Mycoplasma                | 0    | 0    | 0    | 0    | 0    | 0    | 0    | 0    | 0    | 0    | 0    | 0    | 0    | 0    | 0    | 0    | 0    | 0    | 0    | 0    | 0    | 0    |
| Bacteroidales                                | 0    | 0    | 0    | 0    | 0    | 0    | 0    | 0    | 40   | 0    | 0    | 0    | 0    | 0    | 0    | 0    | 0    | 0    | 0    | 0    | 0    | 0    |
| Campylobacter fetus                          | 0    | 0    | 0    | 0    | 0    | 0    | 0    | 0    | 0    | 0    | 0    | 0    | 0    | 0    | 0    | 0    | 0    | 0    | 0    | 0    | 0    | 0    |
| Prevotella aurantiaca                        | 0    | 0    | 0    | 0    | 0    | 0    | 0    | 0    | 0    | 0    | 0    | 0    | 0    | 0    | 0    | 0    | 0    | 0    | 0    | 0    | 0    | 0    |
| Corynebacterium freneyi/xerosis              | 0    | 0    | 0    | 0    | 0    | 0    | 0    | 0    | 0    | 0    | 0    | 0    | 0    | 0    | 0    | 0    | 0    | 0    | 0    | 0    | 0    | 0    |
| Aerococcaceae                                | 0    | 0    | 0    | 0    | 0    | 0    | 0    | 0    | 0    | 0    | 0    | 0    | 0    | 0    | 0    | 0    | 0    | 0    | 0    | 0    | 0    | 0    |
| Moraxella lacunata                           | 0    | 0    | 0    | 0    | 0    | 0    | 0    | 0    | 0    | 0    | 0    | 0    | 0    | 0    | 0    | 0    | 0    | 0    | 0    | 0    | 0    | 0    |
| Corynebacterium accolens/macginleyi          | 0    | 0    | 0    | 0    | 0    | 0    | 0    | 0    | 0    | 0    | 0    | 0    | 0    | 0    | 0    | 0    | 0    | 0    | 0    | 0    | 0    | 0    |
| Massilia aurea                               | 0    | 0    | 0    | 0    | 0    | 0    | 0    | 0    | 0    | 0    | 0    | 0    | 0    | 0    | 0    | 0    | 0    | 0    | 0    | 0    | 0    | 0    |
| Corynebacterium casei                        | 0    | 0    | 0    | 0    | 0    | 0    | 0    | 0    | 0    | 0    | 0    | 0    | 0    | 0    | 0    | 0    | 0    | 0    | 0    | 0    | 0    | 0    |
| Helcococcus sueciensis                       | 0    | 0    | 0    | 0    | 0    | 0    | 0    | 0    | 0    | 0    | 0    | 0    | 0    | 0    | 0    | 0    | 0    | 0    | 0    | 0    | 0    | 0    |
| Lactobacillus casei/rhannosus                | 0    | 0    | 0    | 0    | 0    | 0    | 0    | 0    | 0    | 0    | 0    | 0    | 0    | 0    | 0    | 0    | 0    | 0    | 0    | 0    | 0    | 0    |
| Holdemanella biformis                        | 0    | 0    | 0    | 0    | 0    | 0    | 0    | 0    | 0    | 0    | 0    | 0    | 0    | 0    | 0    | 0    | 0    | 0    | 0    | 0    | 0    | 0    |
| Pelistega                                    | 0    | 0    | 0    | 0    | 0    | 0    | 0    | 0    | 0    | 0    | 0    | 0    | 0    | 0    | 0    | 0    | 0    | 0    | 0    | 0    | 0    | 0    |
| Actinomyces massiliensis                     | 0    | 0    | 0    | 0    | 0    | 0    | 0    | 0    | 0    | 0    | 0    | 0    | 0    | 0    | 0    | 0    | 0    | 0    | 0    | 0    | 0    | 0    |
| Massilia                                     | 0    | 0    | 0    | 0    | 0    | 0    | 0    | 0    | 0    | 0    | 0    | 0    | 0    | 0    | 0    | 0    | 0    | 0    | 0    | 0    | 0    | 0    |
| Staphylococcus equorum/xylosum               | 0    | 0    | 0    | 0    | 0    | 0    | 0    | 0    | 0    | 0    | 0    | 0    | 0    | 0    | 0    | 0    | 0    | 0    | 0    | 0    | 0    | 0    |
| Streptococcus                                | 0    | 0    | 0    | 0    | 0    | 0    | 0    | 0    | 0    | 0    | 0    | 0    | 0    | 0    | 0    | 0    | 0    | 0    | 0    | 0    | 0    | 0    |
| Cutibacterium avidum                         | 0    | 0    | 0    | 0    | 0    | 0    | 0    | 0    | 0    | 0    | 0    | 0    | 0    | 0    | 0    | 0    | 0    | 0    | 0    | 0    | 0    | 0    |

Samples S254 - S281

| Species                                             | S254  | S255 | S256 | S257  | S258 | S260  | S261 | S262  | S264  | S266  | S267  | S268  | S269  | S270  | S271  | S272  | S273  | S274  | S276  | S277 | S279 | S281  |
|-----------------------------------------------------|-------|------|------|-------|------|-------|------|-------|-------|-------|-------|-------|-------|-------|-------|-------|-------|-------|-------|------|------|-------|
| Streptococcus mitis group                           | 28484 | 0    | 827  | 0     | 0    | 2294  | 1194 | 89    | 0     | 12025 | 34562 | 0     | 55    | 417   | 2812  | 0     | 27    | 743   | 0     | 0    | 3729 | 594   |
| Lactobacillus iners                                 | 34    | 3556 | 0    | 0     | 4743 | 0     | 4796 | 0     | 77    | 0     | 0     | 6218  | 0     | 0     | 0     | 56    | 0     | 0     | 33    | 6471 | 0    | 1805  |
| Gardnerella vaginalis                               | 0     | 1697 | 3129 | 0     | 7757 | 0     | 0    | 32    | 0     | 0     | 0     | 19633 | 0     | 0     | 4144  | 29548 | 0     | 0     | 0     | 0    | 0    | 15848 |
| Corynebacterium pseudogenitalium/tuberculostearicum | 0     | 0    | 0    | 0     | 35   | 14077 | 507  | 26514 | 67    | 0     | 1080  | 0     | 159   | 346   | 0     | 181   | 1582  | 545   | 12345 | 41   | 52   | 308   |
| Streptococcus agalactiae                            | 0     | 0    | 0    | 0     | 0    | 0     | 0    | 44    | 53    | 0     | 0     | 0     | 0     | 0     | 0     | 1254  | 0     | 0     | 0     | 0    | 0    | 0     |
| Veillonella montpellierensis                        | 0     | 0    | 473  | 0     | 8251 | 0     | 0    | 0     | 0     | 0     | 0     | 9155  | 0     | 0     | 14199 | 25991 | 0     | 2037  | 0     | 0    | 0    | 0     |
| Streptococcus anginosus                             | 0     | 0    | 86   | 0     | 0    | 0     | 7778 | 0     | 0     | 0     | 0     | 306   | 0     | 20367 | 0     | 14891 | 0     | 0     | 0     | 6548 | 31   | 64    |
| Chlamydia trachomatis                               | 32    | 0    | 0    | 16416 | 0    | 1995  | 0    | 0     | 608   | 0     | 145   | 0     | 0     | 0     | 0     | 4186  | 578   | 0     | 0     | 0    | 0    | 0     |
| Haemophilus parainfluenzae                          | 3681  | 0    | 0    | 0     | 0    | 0     | 1630 | 0     | 0     | 0     | 7233  | 92    | 25190 | 0     | 0     | 0     | 0     | 0     | 0     | 0    | 0    | 0     |
| Finegoldia magna                                    | 0     | 72   | 0    | 30    | 0    | 0     | 0    | 1017  | 0     | 0     | 0     | 50    | 107   | 29513 | 55    | 1409  | 0     | 42    | 0     | 0    | 0    | 0     |
| Peptoniphilus asaccharolyticus/grossensis/harei     | 336   | 2055 | 0    | 34    | 0    | 0     | 7576 | 0     | 2111  | 0     | 0     | 209   | 0     | 19073 | 1018  | 2159  | 0     | 2091  | 0     | 0    | 0    | 0     |
| Sneathia amnii                                      | 0     | 320  | 1329 | 0     | 0    | 0     | 0    | 0     | 0     | 0     | 0     | 0     | 0     | 0     | 24806 | 0     | 0     | 28661 | 0     | 0    | 0    | 0     |
| Staphylococcus caprae/cohnii/epidermidis            | 0     | 0    | 0    | 0     | 0    | 417   | 33   | 170   | 0     | 0     | 145   | 0     | 97    | 44    | 0     | 0     | 68    | 0     | 364   | 223  | 0    | 0     |
| Gemella haemolysans/taiwanensis                     | 53    | 0    | 0    | 0     | 0    | 0     | 0    | 0     | 0     | 0     | 0     | 0     | 0     | 0     | 0     | 0     | 0     | 0     | 0     | 0    | 0    | 0     |
| Sneathia sanguinogens                               | 0     | 0    | 6595 | 0     | 0    | 0     | 0    | 0     | 0     | 0     | 0     | 0     | 0     | 0     | 4876  | 0     | 0     | 24438 | 0     | 0    | 0    | 0     |
| Mycoplasma genitalium                               | 0     | 0    | 0    | 0     | 0    | 0     | 0    | 0     | 0     | 0     | 0     | 0     | 0     | 0     | 0     | 0     | 0     | 133   | 0     | 0    | 0    | 0     |
| Mycoplasma penetrans                                | 0     | 0    | 0    | 0     | 0    | 1588  | 0    | 0     | 0     | 0     | 0     | 0     | 0     | 0     | 0     | 0     | 0     | 0     | 0     | 0    | 0    | 0     |
| Haemophilus haemolyticus/quentini                   | 0     | 0    | 0    | 0     | 0    | 0     | 0    | 0     | 0     | 0     | 0     | 0     | 31    | 0     | 0     | 0     | 0     | 5527  | 0     | 0    | 0    | 649   |
| Corynebacterium pyruviciproducens                   | 0     | 663  | 0    | 0     | 0    | 0     | 2758 | 30    | 0     | 0     | 0     | 0     | 0     | 554   | 0     | 189   | 0     | 0     | 0     | 0    | 0    | 0     |
| Anaerococcus prevotii/tetradius                     | 31    | 69   | 48   | 0     | 0    | 0     | 0    | 0     | 0     | 0     | 0     | 133   | 0     | 41    | 0     | 0     | 0     | 7634  | 0     | 0    | 0    | 0     |
| Haemophilus influenzae                              | 0     | 0    | 0    | 0     | 0    | 0     | 0    | 0     | 0     | 2352  | 0     | 0     | 0     | 0     | 0     | 0     | 0     | 0     | 797   | 0    | 0    | 6129  |
| Staphylococcus epidermidis/hominis                  | 0     | 0    | 0    | 0     | 0    | 611   | 0    | 428   | 0     | 0     | 0     | 34    | 0     | 0     | 0     | 0     | 110   | 0     | 150   | 57   | 0    | 61    |
| Atopobium vaginae                                   | 0     | 0    | 638  | 0     | 533  | 0     | 0    | 0     | 0     | 0     | 0     | 0     | 0     | 0     | 408   | 39    | 0     | 242   | 0     | 0    | 0    | 0     |
| Ureaplasma parvum/urealyticum                       | 0     | 0    | 210  | 0     | 0    | 0     | 0    | 0     | 0     | 0     | 0     | 7501  | 0     | 531   | 0     | 0     | 0     | 656   | 0     | 51   | 0    | 224   |
| Prevotella timonensis                               | 0     | 2793 | 424  | 0     | 0    | 0     | 5325 | 34    | 31906 | 0     | 0     | 0     | 0     | 9112  | 3026  | 2398  | 0     | 1033  | 0     | 0    | 0    | 0     |
| Fenollaria massiliensis/timonensis                  | 0     | 223  | 0    | 0     | 0    | 0     | 923  | 0     | 99    | 0     | 0     | 0     | 0     | 0     | 0     | 486   | 0     | 0     | 0     | 0    | 0    | 0     |
| Anaerococcus                                        | 324   | 0    | 0    | 0     | 0    | 0     | 923  | 430   | 0     | 0     | 0     | 0     | 99    | 87    | 192   | 200   | 0     | 213   | 0     | 0    | 0    | 0     |
| Corynebacterium coyleae                             | 0     | 0    | 0    | 0     | 0    | 53    | 0    | 872   | 0     | 0     | 0     | 256   | 101   | 33    | 0     | 196   | 32588 | 255   | 0     | 0    | 0    | 0     |
| Prevotella bivia                                    | 0     | 0    | 0    | 0     | 0    | 0     | 0    | 0     | 0     | 0     | 0     | 512   | 0     | 6247  | 0     | 2316  | 0     | 390   | 0     | 0    | 0    | 0     |
| Prevotella melaninogenica                           | 0     | 0    | 1022 | 0     | 0    | 0     | 0    | 0     | 0     | 0     | 0     | 0     | 0     | 0     | 0     | 4658  | 0     | 19466 | 0     | 0    | 0    | 0     |
| Corynebacterium aurimucosum/minimum/singulare       | 0     | 0    | 0    | 0     | 0    | 590   | 92   | 12355 | 0     | 0     | 398   | 0     | 0     | 223   | 0     | 46    | 346   | 126   | 4405  | 0    | 44   | 62    |
| Staphylococcus aureus                               | 0     | 0    | 0    | 0     | 0    | 0     | 0    | 0     | 0     | 0     | 0     | 0     | 0     | 0     | 0     | 0     | 0     | 0     | 0     | 0    | 0    | 0     |
| Anaerococcus lactolyticus                           | 0     | 2659 | 0    | 0     | 0    | 1529  | 0    | 2192  | 0     | 0     | 0     | 0     | 0     | 0     | 153   | 230   | 0     | 0     | 0     | 0    | 0    | 0     |
| Aerococcus christensenii                            | 0     | 1606 | 114  | 0     | 0    | 0     | 0    | 0     | 0     | 0     | 0     | 607   | 0     | 0     | 325   | 3524  | 0     | 0     | 0     | 0    | 0    | 1274  |
| Corynebacterium glucuronolyticum                    | 0     | 0    | 0    | 0     | 0    | 0     | 0    | 27    | 0     | 0     | 150   | 0     | 0     | 491   | 0     | 0     | 0     | 0     | 0     | 0    | 0    | 0     |
| Veillonella atypica                                 | 0     | 0    | 0    | 0     | 0    | 0     | 0    | 0     | 0     | 0     | 0     | 0     | 0     | 0     | 0     | 0     | 0     | 0     | 0     | 0    | 0    | 0     |
| Veillonella                                         | 0     | 0    | 0    | 0     | 0    | 0     | 0    | 0     | 0     | 0     | 0     | 45    | 0     | 0     | 0     | 0     | 0     | 0     | 0     | 0    | 0    | 0     |
| Mycoplasma hominis                                  | 0     | 0    | 117  | 0     | 0    | 0     | 0    | 0     | 0     | 0     | 0     | 0     | 0     | 0     | 199   | 0     | 0     | 0     | 0     | 0    | 0    | 193   |
| Granulicatella elegans                              | 0     | 0    | 0    | 0     | 0    | 0     | 0    | 0     | 0     | 0     | 109   | 0     | 0     | 0     | 0     | 0     | 0     | 245   | 0     | 0    | 0    | 0     |
| Ezakiella                                           | 0     | 90   | 151  | 0     | 0    | 0     | 0    | 0     | 21244 | 0     | 0     | 0     | 0     | 0     | 0     | 0     | 0     | 0     | 0     | 0    | 0    | 0     |
| Shigella/Escherichia                                | 0     | 0    | 0    | 0     | 0    | 0     | 0    | 0     | 0     | 0     | 0     | 0     | 0     | 0     | 0     | 0     | 0     | 0     | 0     | 0    | 0    | 0     |
| Streptococcus salivarius                            | 0     | 0    | 0    | 0     | 0    | 0     | 0    | 0     | 0     | 0     | 0     | 0     | 0     | 0     | 0     | 0     | 0     | 0     | 0     | 0    | 0    | 0     |
| Actinomyces turicensis                              | 0     | 437  | 0    | 0     | 0    | 0     | 409  | 0     | 79    | 0     | 0     | 0     | 0     | 0     | 81    | 457   | 0     | 51    | 0     | 0    | 0    | 0     |
| Prevotella corporis                                 | 0     | 0    | 0    | 0     | 0    | 0     | 0    | 0     | 246   | 0     | 0     | 0     | 0     | 0     | 0     | 363   | 0     | 0     | 0     | 0    | 0    | 0     |
| Corynebacterium simulans                            | 0     | 0    | 0    | 0     | 0    | 0     | 218  | 0     | 0     | 0     | 0     | 0     | 0     | 0     | 0     | 0     | 0     | 0     | 0     | 0    | 0    | 0     |
| Fusobacterium equinum                               | 0     | 0    | 0    | 0     | 0    | 0     | 0    | 0     | 0     | 0     | 0     | 0     | 0     | 0     | 0     | 0     | 0     | 134   | 0     | 0    | 0    | 0     |
| Corynebacterium                                     | 167   | 0    | 0    | 75    | 0    | 0     | 1441 | 0     | 105   | 0     | 0     | 0     | 0     | 30    | 0     | 0     | 148   | 0     | 0     | 0    | 0    | 0     |
| Staphylococcus haemolyticus                         | 0     | 0    | 0    | 0     | 0    | 69    | 0    | 279   | 0     | 0     | 153   | 0     | 57    | 0     | 0     | 0     | 821   | 37    | 135   | 0    | 0    | 68    |
| Gemella asaccharolytica                             | 0     | 261  | 221  | 0     | 0    | 0     | 0    | 0     | 0     | 0     | 0     | 0     | 0     | 0     | 659   | 2174  | 0     | 634   | 0     | 0    | 0    | 68    |
| Peptoniphilus                                       | 0     | 220  | 36   | 0     | 0    | 0     | 420  | 0     | 6222  | 0     | 0     | 0     | 0     | 0     | 594   | 243   | 0     | 107   | 0     | 0    | 0    | 0     |
| Corynebacterium hadale/imitans                      | 0     | 0    | 0    | 0     | 0    | 91    | 0    | 12469 | 0     | 0     | 0     | 0     | 0     | 27    | 0     | 0     | 171   | 0     | 2325  | 0    | 0    | 0     |
| Eggerthella sp. type 1 (species)                    | 0     | 0    | 202  | 0     | 318  | 0     | 0    | 0     | 0     | 0     | 0     | 1197  | 0     | 0     | 1944  | 0     | 0     | 1491  | 0     | 0    | 0    | 82    |
| Prevotella disiens                                  | 0     | 0    | 0    | 0     | 0    | 0     | 0    | 0     | 0     | 0     | 0     | 0     | 6668  | 0     | 5011  | 0     | 0     | 0     | 0     | 0    | 0    | 0     |
| Peptoniphilus lacrimalis                            | 0     | 0    | 0    | 0     | 0    | 0     | 0    | 0     | 1007  | 0     | 0     | 0     | 0     | 1290  | 0     | 85    | 0     | 0     | 0     | 0    | 0    | 0     |
| Anaerococcus vaginalis                              | 0     | 43   | 0    | 0     | 0    | 0     | 218  | 0     | 257   | 0     | 0     | 0     | 0     | 0     | 0     | 26    | 0     | 35    | 0     | 0    | 0    | 0     |
| Facklamia hominis                                   | 165   | 0    | 0    | 0     | 0    | 0     | 1130 | 0     | 0     | 0     | 0     | 0     | 0     | 0     | 0     | 235   | 0     | 164   | 0     | 0    | 0    | 0     |
| Prevotella amnii                                    | 0     | 0    | 1585 | 0     | 0    | 0     | 0    | 0     | 0     | 0     | 0     | 3387  | 0     | 0     | 13957 | 0     | 0     | 0     | 0     | 0    | 0    | 0     |
| Campylobacter ureolyticus                           | 0     | 680  | 78   | 0     | 0    | 0     | 665  | 0     | 2343  | 0     | 0     | 0     | 0     | 2901  | 86    | 74    | 0     | 805   | 0     | 0    | 0    | 0     |
| BVAB2 (species)                                     | 0     | 0    | 632  | 0     | 0    | 0     | 0    | 0     | 213   | 0     | 0     | 0     | 0     | 0     | 286   | 0     | 0     | 0     | 0     | 0    | 0    | 0     |
| Haemophilus                                         | 0     | 0    | 0    | 0     | 0    | 0     | 0    | 0     | 0     | 0     | 0     | 0     | 0     | 0     | 0     | 0     | 0     | 0     | 0     | 0    | 0    | 0     |
| Anaerococcus hydrogenalis/rubeifantis               | 0     | 0    | 0    | 0     | 0    | 0     | 175  | 0     | 0     | 0     | 0     | 0     | 0     | 2981  | 0     | 234   | 0     | 0     | 0     | 0    | 0    | 0     |
| Anaerococcus mediterraneensis                       | 0     | 250  | 0    | 0     | 0    | 0     | 0    | 0     | 657   | 0     | 0     | 0     | 0     | 0     | 264   | 0     | 0     | 323   | 0     | 0    | 0    | 0     |
| Dialister sp. type 2                                | 0     | 36   | 163  | 0     | 0    | 0     | 0    | 0     | 6684  | 0     | 0     | 0     | 0     | 0     | 141   | 154   | 0     | 0     | 0     | 0    | 0    | 0     |
| Dialister microaerophilus                           | 0     | 131  | 42   | 0     | 29   | 0     | 360  | 0     | 819   | 0     | 0     | 201   | 0     | 0     | 183   | 1024  | 0     | 650   | 0     | 0    | 0    | 0     |
| Corynebacterium amycolatum                          | 0     | 0    | 0    | 0     | 0    | 0     | 0    | 0     | 0     | 0     | 0     | 0     | 0     | 0     | 0     | 0     | 0     | 0     | 0     | 0    | 0    | 0     |
| Ureaplasma                                          | 0     | 257  | 179  | 0     | 0    | 0     | 0    | 0     | 0     | 0     | 0     | 36    | 0     | 0     | 0     | 0     | 0     | 0     | 0     | 0    | 0    | 126   |
| Enterococcus faecalis                               | 0     | 0    | 0    | 0     | 0    | 0     | 0    | 0     | 0     | 0     | 0     | 0     | 0     | 563   | 0     | 0     | 0     | 0     | 0     | 0    | 0    | 0     |
| Parvimonas                                          | 0     | 458  | 0    | 0     | 0    | 0     | 0    | 0     | 49    | 0     | 0     | 0     | 0     | 351   | 0     | 2169  | 0     | 234   | 0     | 0    | 0    | 0     |
| Haemophilus pittmaniae                              | 0     | 0    | 0    | 0     | 0    | 0     | 1665 | 0     | 0     | 0     | 0     | 202   | 0     | 0     | 0     | 0     | 0     | 0     | 0     | 0    | 0    | 0     |
| Actinomyces neuii                                   | 0     | 0    | 0    | 0     | 0    | 0     | 294  | 0     | 0     | 0     | 0     | 0     | 0     | 205   | 0     | 0     | 0     | 0     | 0     | 0    | 0    | 0     |

# Samples S254 - S281

| Species                                                | S254 | S255 | S256 | S257 | S258 | S260 | S261 | S262 | S264  | S266 | S267 | S268 | S269 | S270 | S271 | S272 | S273 | S274  | S276 | S277 | S279 | S281 |
|--------------------------------------------------------|------|------|------|------|------|------|------|------|-------|------|------|------|------|------|------|------|------|-------|------|------|------|------|
| Peptoniphilus rhintidis                                | 0    | 0    | 0    | 0    | 0    | 0    | 0    | 119  | 0     | 0    | 0    | 0    | 0    | 1617 | 0    | 0    | 0    | 0     | 0    | 0    | 0    | 0    |
| Anaerococcus senegalensis                              | 0    | 0    | 0    | 0    | 0    | 0    | 0    | 66   | 0     | 0    | 0    | 0    | 0    | 0    | 0    | 0    | 0    | 0     | 0    | 0    | 0    | 0    |
| Peptostreptococcus anaerobius                          | 0    | 0    | 0    | 0    | 0    | 0    | 0    | 0    | 2678  | 0    | 0    | 0    | 0    | 0    | 0    | 26   | 0    | 40    | 0    | 0    | 215  | 0    |
| Dialister propionificiens                              | 0    | 0    | 0    | 0    | 0    | 0    | 0    | 54   | 943   | 0    | 0    | 0    | 0    | 6531 | 275  | 1451 | 0    | 0     | 0    | 0    | 0    | 0    |
| Peptoniphilus harei                                    | 0    | 0    | 0    | 0    | 0    | 0    | 0    | 0    | 0     | 0    | 0    | 0    | 0    | 0    | 0    | 0    | 0    | 0     | 0    | 0    | 0    | 0    |
| Negativicoccus succinivorans                           | 0    | 0    | 0    | 0    | 0    | 0    | 745  | 47   | 0     | 0    | 0    | 0    | 0    | 986  | 0    | 0    | 0    | 0     | 0    | 0    | 0    | 0    |
| Parvimonas micra                                       | 0    | 0    | 0    | 0    | 0    | 0    | 0    | 0    | 0     | 0    | 0    | 0    | 0    | 0    | 854  | 149  | 0    | 0     | 0    | 0    | 0    | 0    |
| Actinomyces ihumii                                     | 0    | 0    | 0    | 0    | 0    | 0    | 0    | 0    | 0     | 0    | 0    | 0    | 0    | 1212 | 0    | 0    | 0    | 0     | 0    | 0    | 0    | 0    |
| Actinotignum timonense                                 | 0    | 0    | 0    | 0    | 0    | 0    | 1590 | 0    | 0     | 0    | 0    | 0    | 0    | 0    | 0    | 104  | 0    | 0     | 0    | 0    | 0    | 0    |
| Fenollaria                                             | 0    | 282  | 0    | 0    | 0    | 0    | 0    | 0    | 13664 | 0    | 0    | 0    | 0    | 0    | 0    | 157  | 0    | 0     | 0    | 0    | 0    | 0    |
| Fusobacterium massiliense                              | 0    | 0    | 0    | 0    | 0    | 0    | 0    | 0    | 0     | 0    | 0    | 0    | 0    | 0    | 0    | 0    | 0    | 3184  | 0    | 0    | 0    | 0    |
| Actinobaculum massiliense                              | 0    | 0    | 0    | 0    | 0    | 0    | 4909 | 0    | 0     | 0    | 0    | 0    | 0    | 0    | 0    | 0    | 0    | 0     | 0    | 0    | 0    | 0    |
| Peptoniphilus coxii                                    | 0    | 95   | 0    | 0    | 0    | 0    | 0    | 0    | 337   | 0    | 0    | 0    | 0    | 0    | 33   | 121  | 0    | 33    | 0    | 0    | 0    | 0    |
| Staphylococcus lugdunensis                             | 0    | 0    | 0    | 0    | 0    | 0    | 0    | 0    | 0     | 0    | 0    | 0    | 0    | 0    | 0    | 0    | 0    | 0     | 0    | 0    | 0    | 0    |
| Dermabacter                                            | 0    | 0    | 0    | 0    | 0    | 59   | 0    | 861  | 0     | 0    | 0    | 0    | 0    | 47   | 0    | 0    | 116  | 92    | 734  | 0    | 0    | 0    |
| Alloscardovia omnicolens                               | 0    | 0    | 0    | 0    | 0    | 0    | 0    | 0    | 0     | 0    | 0    | 0    | 0    | 33   | 0    | 0    | 0    | 0     | 0    | 0    | 0    | 0    |
| Varibaculum cambriense                                 | 0    | 435  | 0    | 0    | 0    | 0    | 41   | 0    | 296   | 0    | 0    | 0    | 0    | 2875 | 0    | 0    | 0    | 0     | 0    | 0    | 0    | 0    |
| Streptococcus urinialis                                | 0    | 0    | 0    | 0    | 0    | 0    | 0    | 0    | 0     | 0    | 0    | 0    | 0    | 0    | 0    | 0    | 0    | 0     | 0    | 0    | 0    | 0    |
| Corynebacterium appendicis                             | 0    | 0    | 0    | 0    | 0    | 0    | 0    | 92   | 0     | 0    | 0    | 0    | 0    | 0    | 0    | 0    | 71   | 0     | 0    | 0    | 0    | 0    |
| Actinotignum schaalii                                  | 0    | 41   | 0    | 0    | 0    | 0    | 1299 | 0    | 0     | 0    | 0    | 0    | 0    | 366  | 0    | 0    | 0    | 0     | 0    | 0    | 0    | 0    |
| Corynebacterium timonense                              | 0    | 26   | 0    | 0    | 0    | 0    | 735  | 0    | 0     | 0    | 0    | 0    | 0    | 0    | 0    | 0    | 0    | 0     | 0    | 0    | 0    | 0    |
| Gemella                                                | 0    | 0    | 0    | 0    | 0    | 0    | 0    | 0    | 0     | 0    | 0    | 0    | 0    | 0    | 0    | 0    | 0    | 0     | 0    | 0    | 0    | 0    |
| Klebsiella aerogenes/Enterobacter asburiae             | 0    | 0    | 0    | 0    | 0    | 0    | 0    | 0    | 0     | 0    | 0    | 0    | 0    | 0    | 0    | 0    | 0    | 0     | 0    | 0    | 0    | 0    |
| Fusobacterium periodonticum                            | 0    | 0    | 0    | 0    | 0    | 0    | 0    | 0    | 0     | 0    | 0    | 0    | 0    | 0    | 0    | 0    | 0    | 0     | 0    | 0    | 0    | 0    |
| Veillonella dispar                                     | 0    | 0    | 0    | 0    | 0    | 0    | 0    | 0    | 0     | 0    | 0    | 0    | 0    | 114  | 0    | 0    | 0    | 0     | 0    | 0    | 0    | 0    |
| Prevotella colorans                                    | 0    | 80   | 0    | 0    | 0    | 0    | 0    | 0    | 3158  | 0    | 0    | 0    | 0    | 0    | 0    | 381  | 0    | 0     | 0    | 0    | 0    | 0    |
| Candidatus Peptoniphilus massiliensis                  | 0    | 0    | 0    | 0    | 0    | 0    | 0    | 0    | 751   | 0    | 0    | 0    | 0    | 2892 | 0    | 0    | 0    | 0     | 0    | 0    | 0    | 0    |
| Eremococcus                                            | 0    | 0    | 0    | 0    | 0    | 49   | 0    | 1558 | 0     | 0    | 0    | 0    | 0    | 52   | 0    | 0    | 42   | 0     | 119  | 0    | 0    | 0    |
| Varibaculum anthropi                                   | 0    | 55   | 0    | 0    | 0    | 0    | 374  | 0    | 682   | 0    | 0    | 0    | 0    | 0    | 0    | 0    | 0    | 0     | 0    | 0    | 0    | 0    |
| Propionimicrobium lymphophilum                         | 0    | 0    | 0    | 0    | 0    | 0    | 43   | 0    | 0     | 0    | 0    | 0    | 0    | 278  | 0    | 0    | 0    | 0     | 0    | 0    | 0    | 0    |
| Streptococcus dysgalactiae                             | 0    | 0    | 0    | 0    | 0    | 0    | 0    | 0    | 0     | 0    | 0    | 0    | 0    | 0    | 0    | 0    | 0    | 0     | 0    | 0    | 6453 | 0    |
| Negativicoccus                                         | 0    | 497  | 46   | 0    | 0    | 0    | 0    | 0    | 2484  | 0    | 0    | 0    | 0    | 2706 | 0    | 0    | 0    | 0     | 0    | 0    | 0    | 0    |
| Porphyromonas somerae                                  | 0    | 0    | 149  | 0    | 0    | 0    | 0    | 0    | 37    | 0    | 0    | 0    | 0    | 0    | 0    | 0    | 0    | 124   | 0    | 0    | 0    | 0    |
| Corynebacterium jeikeium                               | 0    | 0    | 0    | 0    | 0    | 0    | 0    | 1673 | 0     | 0    | 44   | 0    | 0    | 0    | 0    | 0    | 422  | 69    | 0    | 0    | 0    | 0    |
| Mobiluncus curtisii                                    | 0    | 50   | 0    | 0    | 0    | 0    | 0    | 0    | 963   | 0    | 0    | 0    | 0    | 1458 | 0    | 585  | 0    | 0     | 0    | 0    | 0    | 0    |
| Porphyromonas uenonis                                  | 0    | 400  | 40   | 0    | 0    | 0    | 0    | 0    | 33654 | 0    | 0    | 0    | 0    | 706  | 155  | 36   | 0    | 0     | 0    | 0    | 0    | 0    |
| Aerococcus urinae                                      | 0    | 0    | 0    | 0    | 0    | 0    | 1134 | 0    | 0     | 0    | 0    | 0    | 0    | 0    | 0    | 34   | 0    | 0     | 0    | 0    | 0    | 0    |
| Corynebacterium mycetoides                             | 0    | 0    | 0    | 0    | 0    | 0    | 841  | 0    | 0     | 0    | 0    | 0    | 0    | 0    | 0    | 0    | 0    | 0     | 0    | 0    | 0    | 0    |
| Cutibacterium acnes                                    | 0    | 0    | 0    | 0    | 0    | 0    | 0    | 0    | 0     | 0    | 0    | 0    | 0    | 0    | 0    | 0    | 0    | 0     | 0    | 0    | 0    | 0    |
| Urinacoccus massiliensis                               | 0    | 28   | 0    | 0    | 0    | 0    | 292  | 0    | 965   | 0    | 0    | 0    | 0    | 0    | 126  | 0    | 0    | 78    | 0    | 0    | 0    | 0    |
| Campylobacter hominis                                  | 0    | 0    | 0    | 0    | 0    | 0    | 0    | 0    | 2571  | 0    | 0    | 0    | 0    | 0    | 0    | 37   | 0    | 0     | 0    | 0    | 0    | 0    |
| Staphylococcus capitis/caprae                          | 0    | 0    | 0    | 0    | 0    | 0    | 0    | 0    | 0     | 0    | 0    | 0    | 0    | 0    | 0    | 0    | 747  | 64    | 399  | 0    | 0    | 0    |
| Sneathia                                               | 0    | 0    | 0    | 0    | 0    | 0    | 0    | 0    | 0     | 0    | 0    | 0    | 0    | 0    | 5091 | 0    | 0    | 0     | 0    | 0    | 0    | 0    |
| Prevotella jejuni                                      | 0    | 0    | 0    | 0    | 0    | 0    | 0    | 0    | 0     | 0    | 0    | 0    | 0    | 0    | 0    | 0    | 0    | 0     | 0    | 0    | 0    | 0    |
| Varibaculum                                            | 0    | 0    | 0    | 0    | 0    | 0    | 0    | 0    | 717   | 0    | 0    | 0    | 0    | 0    | 0    | 128  | 0    | 0     | 0    | 0    | 0    | 0    |
| Corynebacterium striatum                               | 0    | 0    | 0    | 0    | 0    | 0    | 0    | 0    | 0     | 0    | 0    | 0    | 0    | 0    | 0    | 0    | 0    | 0     | 0    | 0    | 0    | 0    |
| Jonquetella anthropi                                   | 0    | 0    | 0    | 0    | 0    | 0    | 0    | 0    | 0     | 0    | 0    | 0    | 0    | 0    | 0    | 0    | 0    | 0     | 0    | 0    | 0    | 0    |
| Peptoniphilus koenoenariae                             | 0    | 0    | 0    | 0    | 0    | 0    | 0    | 229  | 0     | 0    | 0    | 0    | 0    | 0    | 0    | 0    | 0    | 0     | 0    | 0    | 0    | 0    |
| Bifidobacterium longum                                 | 0    | 0    | 0    | 0    | 0    | 0    | 0    | 0    | 0     | 0    | 0    | 0    | 0    | 0    | 0    | 0    | 0    | 0     | 0    | 0    | 0    | 0    |
| Helicobacter                                           | 0    | 0    | 0    | 0    | 0    | 0    | 0    | 0    | 0     | 0    | 0    | 0    | 0    | 0    | 0    | 0    | 0    | 0     | 0    | 0    | 0    | 0    |
| Lawsonella clevelandensis                              | 0    | 0    | 0    | 0    | 0    | 0    | 0    | 0    | 25    | 0    | 0    | 0    | 0    | 83   | 0    | 136  | 0    | 0     | 0    | 0    | 0    | 0    |
| Escherichia coli/fergusonii                            | 0    | 0    | 0    | 0    | 0    | 0    | 0    | 0    | 0     | 0    | 0    | 0    | 0    | 0    | 0    | 0    | 0    | 0     | 0    | 0    | 0    | 0    |
| Fusobacterium nucleatum                                | 0    | 0    | 855  | 0    | 0    | 0    | 0    | 0    | 1001  | 0    | 0    | 0    | 0    | 0    | 0    | 2116 | 0    | 0     | 0    | 0    | 0    | 0    |
| Porphyromonas asaccharolytica                          | 0    | 0    | 0    | 0    | 0    | 0    | 0    | 0    | 0     | 0    | 0    | 0    | 0    | 0    | 0    | 0    | 0    | 0     | 0    | 0    | 0    | 0    |
| Anaerococcus octavius                                  | 0    | 0    | 0    | 0    | 0    | 0    | 0    | 0    | 0     | 0    | 0    | 0    | 0    | 0    | 0    | 0    | 0    | 0     | 0    | 0    | 0    | 0    |
| Fusobacterium                                          | 0    | 0    | 0    | 0    | 0    | 0    | 0    | 0    | 0     | 0    | 0    | 0    | 0    | 0    | 0    | 0    | 0    | 10347 | 0    | 0    | 0    | 0    |
| Corynebacterium phoceense                              | 0    | 0    | 0    | 0    | 0    | 0    | 0    | 0    | 0     | 0    | 0    | 0    | 0    | 0    | 0    | 0    | 0    | 0     | 0    | 0    | 0    | 0    |
| Ruminococcus                                           | 0    | 0    | 0    | 0    | 0    | 0    | 0    | 0    | 0     | 0    | 0    | 0    | 0    | 0    | 0    | 0    | 0    | 0     | 0    | 0    | 0    | 0    |
| Arcanobacterium                                        | 0    | 0    | 0    | 0    | 0    | 0    | 0    | 0    | 1306  | 0    | 0    | 0    | 0    | 0    | 0    | 0    | 0    | 0     | 0    | 0    | 0    | 0    |
| Khoudiadiopia                                          | 0    | 0    | 0    | 0    | 0    | 0    | 0    | 0    | 898   | 0    | 0    | 0    | 0    | 165  | 0    | 0    | 0    | 0     | 0    | 0    | 0    | 0    |
| Atopobium deltae                                       | 0    | 0    | 0    | 0    | 0    | 0    | 0    | 0    | 202   | 0    | 0    | 0    | 0    | 0    | 0    | 185  | 0    | 0     | 0    | 0    | 0    | 0    |
| Haemophilus paraaerolyticus                            | 0    | 0    | 0    | 0    | 0    | 0    | 0    | 0    | 0     | 0    | 0    | 0    | 0    | 0    | 0    | 0    | 0    | 0     | 0    | 0    | 0    | 0    |
| Howardella                                             | 0    | 29   | 0    | 0    | 0    | 0    | 195  | 0    | 98    | 0    | 0    | 0    | 0    | 192  | 0    | 179  | 0    | 0     | 0    | 0    | 0    | 0    |
| Prevotella buccalis                                    | 0    | 482  | 66   | 0    | 0    | 0    | 0    | 0    | 4826  | 0    | 0    | 0    | 0    | 1452 | 100  | 480  | 0    | 0     | 0    | 0    | 0    | 0    |
| Corynebacterium auris                                  | 0    | 0    | 0    | 0    | 0    | 0    | 0    | 0    | 0     | 0    | 0    | 0    | 0    | 0    | 0    | 0    | 0    | 0     | 0    | 0    | 0    | 0    |
| Candidatus Mycoplasma gireddii                         | 0    | 0    | 0    | 0    | 0    | 0    | 0    | 0    | 0     | 0    | 0    | 0    | 0    | 0    | 0    | 0    | 0    | 0     | 0    | 0    | 0    | 0    |
| Alloicoccus                                            | 0    | 0    | 0    | 0    | 0    | 0    | 0    | 0    | 0     | 0    | 0    | 0    | 0    | 0    | 0    | 0    | 0    | 0     | 0    | 0    | 0    | 0    |
| Corynebacterium founierii/mucifaciens/ureicelerivorans | 0    | 0    | 0    | 0    | 0    | 0    | 39   | 0    | 0     | 0    | 0    | 0    | 0    | 0    | 0    | 0    | 0    | 0     | 0    | 0    | 0    | 0    |
| Corynebacterium auris/timonense                        | 0    | 0    | 0    | 0    | 0    | 0    | 0    | 0    | 0     | 0    | 0    | 0    | 0    | 0    | 0    | 0    | 0    | 0     | 0    | 0    | 0    | 0    |
| Veillonella ratti/seminalis                            | 0    | 0    | 0    | 0    | 0    | 0    | 0    | 0    | 0     | 0    | 0    | 0    | 0    | 56   | 0    | 0    | 0    | 0     | 0    | 0    | 0    | 0    |

# Samples S254 - S281

| Species                                    | S254 | S255 | S256 | S257 | S258 | S260 | S261 | S262 | S264 | S266 | S267 | S268 | S269 | S270 | S271 | S272 | S273 | S274 | S276 | S277 | S279 | S281 |
|--------------------------------------------|------|------|------|------|------|------|------|------|------|------|------|------|------|------|------|------|------|------|------|------|------|------|
| Lactobacillus gasseri                      | 0    | 0    | 0    | 0    | 0    | 0    | 0    | 0    | 0    | 0    | 0    | 0    | 0    | 0    | 0    | 0    | 0    | 0    | 0    | 0    | 0    | 0    |
| Tissierella                                | 0    | 0    | 0    | 0    | 0    | 0    | 0    | 0    | 4478 | 0    | 0    | 0    | 0    | 0    | 0    | 0    | 0    | 0    | 0    | 0    | 0    | 0    |
| Granulicatella adiacens                    | 0    | 0    | 0    | 0    | 0    | 0    | 0    | 0    | 0    | 0    | 0    | 0    | 0    | 0    | 0    | 0    | 0    | 0    | 0    | 0    | 0    | 0    |
| Sutterella                                 | 0    | 0    | 34   | 0    | 0    | 0    | 0    | 0    | 82   | 0    | 0    | 0    | 0    | 0    | 0    | 238  | 0    | 0    | 0    | 0    | 0    | 0    |
| Prevotella nanceiensis                     | 0    | 0    | 0    | 0    | 0    | 0    | 0    | 0    | 0    | 0    | 0    | 0    | 0    | 0    | 0    | 0    | 0    | 0    | 0    | 0    | 0    | 0    |
| Lactobacillus jensenii                     | 0    | 0    | 0    | 0    | 0    | 0    | 0    | 0    | 0    | 0    | 0    | 0    | 0    | 0    | 0    | 0    | 0    | 0    | 0    | 0    | 0    | 0    |
| Lactobacillus crispatus                    | 0    | 0    | 0    | 0    | 0    | 0    | 0    | 0    | 0    | 0    | 0    | 0    | 0    | 0    | 0    | 0    | 0    | 0    | 0    | 0    | 0    | 0    |
| Candidate Division TM7 vaginal (genus)     | 0    | 55   | 324  | 0    | 0    | 0    | 0    | 0    | 0    | 0    | 0    | 0    | 0    | 0    | 0    | 0    | 0    | 0    | 0    | 0    | 0    | 0    |
| Candidatus Saccharimonas                   | 0    | 0    | 0    | 0    | 0    | 0    | 0    | 0    | 0    | 0    | 0    | 0    | 0    | 0    | 0    | 0    | 0    | 0    | 0    | 0    | 0    | 0    |
| Peptococcus niger                          | 0    | 0    | 0    | 0    | 0    | 0    | 0    | 0    | 401  | 0    | 0    | 0    | 0    | 0    | 0    | 0    | 0    | 0    | 0    | 0    | 0    | 0    |
| Neisseria flavescens/perflava              | 0    | 0    | 0    | 0    | 0    | 0    | 0    | 0    | 0    | 0    | 0    | 0    | 0    | 0    | 0    | 0    | 0    | 0    | 0    | 0    | 0    | 0    |
| Gemella sanguinis                          | 0    | 0    | 0    | 0    | 0    | 0    | 0    | 0    | 0    | 0    | 0    | 0    | 0    | 0    | 0    | 0    | 0    | 0    | 0    | 0    | 0    | 0    |
| Porphyromonas                              | 0    | 0    | 0    | 0    | 0    | 0    | 0    | 0    | 141  | 0    | 0    | 0    | 0    | 0    | 0    | 64   | 0    | 0    | 0    | 0    | 0    | 0    |
| Prevotella                                 | 0    | 245  | 64   | 0    | 0    | 0    | 0    | 0    | 310  | 0    | 0    | 0    | 0    | 0    | 0    | 0    | 0    | 0    | 0    | 0    | 0    | 0    |
| Corynebacterium thomssenii                 | 0    | 0    | 0    | 0    | 0    | 0    | 0    | 0    | 0    | 0    | 0    | 0    | 0    | 0    | 0    | 0    | 0    | 0    | 0    | 0    | 0    | 0    |
| Lachnospiraceae                            | 0    | 27   | 231  | 0    | 0    | 0    | 0    | 0    | 3375 | 0    | 0    | 0    | 0    | 0    | 0    | 0    | 0    | 3102 | 0    | 0    | 0    | 0    |
| Corynebacterium tuberculostearicum         | 0    | 0    | 0    | 0    | 0    | 0    | 0    | 0    | 0    | 0    | 0    | 0    | 0    | 0    | 0    | 0    | 0    | 0    | 0    | 0    | 0    | 0    |
| Dermabacter hominis                        | 0    | 0    | 0    | 0    | 0    | 0    | 0    | 0    | 0    | 0    | 0    | 0    | 0    | 0    | 0    | 0    | 0    | 0    | 0    | 0    | 0    | 0    |
| Veillonella rogosae                        | 0    | 0    | 0    | 0    | 0    | 0    | 0    | 0    | 0    | 0    | 0    | 0    | 0    | 0    | 0    | 0    | 0    | 0    | 0    | 0    | 0    | 0    |
| Actinomyces hongkongensis                  | 0    | 0    | 0    | 0    | 0    | 0    | 0    | 0    | 0    | 0    | 0    | 0    | 0    | 0    | 32   | 0    | 0    | 0    | 0    | 0    | 0    | 0    |
| Veillonella parvula/rogosae                | 0    | 0    | 0    | 0    | 0    | 0    | 0    | 0    | 0    | 0    | 0    | 0    | 0    | 0    | 0    | 0    | 0    | 0    | 0    | 0    | 0    | 0    |
| Anaerococcus provencensis                  | 0    | 0    | 0    | 0    | 0    | 0    | 0    | 114  | 0    | 0    | 0    | 0    | 0    | 0    | 0    | 0    | 0    | 0    | 0    | 0    | 0    | 0    |
| Porphyromonas sp. type 1                   | 0    | 0    | 0    | 0    | 0    | 0    | 0    | 0    | 1156 | 0    | 0    | 0    | 0    | 0    | 0    | 0    | 0    | 0    | 0    | 0    | 0    | 0    |
| Brevibacterium paucivorans                 | 0    | 0    | 0    | 0    | 0    | 0    | 0    | 0    | 0    | 0    | 0    | 0    | 0    | 0    | 0    | 243  | 0    | 0    | 0    | 0    | 0    | 0    |
| Peptostreptococcus                         | 0    | 0    | 0    | 0    | 0    | 0    | 0    | 0    | 0    | 0    | 0    | 0    | 0    | 0    | 0    | 0    | 0    | 0    | 0    | 0    | 0    | 0    |
| Facklamia languida                         | 0    | 0    | 0    | 0    | 0    | 0    | 0    | 0    | 0    | 0    | 0    | 0    | 0    | 0    | 0    | 0    | 0    | 0    | 0    | 0    | 0    | 0    |
| Streptobacillus                            | 0    | 0    | 0    | 0    | 0    | 0    | 0    | 0    | 0    | 0    | 0    | 0    | 0    | 0    | 0    | 0    | 0    | 0    | 0    | 0    | 0    | 0    |
| Gemella haemolysans                        | 0    | 0    | 0    | 0    | 0    | 0    | 0    | 0    | 0    | 0    | 0    | 0    | 0    | 0    | 0    | 0    | 0    | 0    | 0    | 0    | 0    | 0    |
| Haemophilus sputorum                       | 0    | 0    | 0    | 0    | 0    | 0    | 0    | 0    | 0    | 0    | 0    | 0    | 0    | 0    | 0    | 0    | 0    | 0    | 0    | 0    | 0    | 0    |
| Actinotignum urinale                       | 0    | 0    | 0    | 0    | 0    | 0    | 0    | 0    | 0    | 0    | 0    | 0    | 0    | 0    | 0    | 0    | 0    | 0    | 0    | 0    | 0    | 0    |
| Dialister pneumosintes                     | 0    | 0    | 0    | 0    | 0    | 0    | 0    | 0    | 0    | 0    | 0    | 0    | 0    | 0    | 0    | 0    | 0    | 0    | 0    | 0    | 0    | 0    |
| Treponema pallidum                         | 0    | 0    | 0    | 0    | 0    | 0    | 0    | 3989 | 0    | 0    | 0    | 0    | 0    | 0    | 0    | 0    | 0    | 0    | 0    | 0    | 0    | 0    |
| Porphyromonas bennonis                     | 0    | 107  | 0    | 0    | 0    | 0    | 0    | 0    | 1546 | 0    | 0    | 0    | 0    | 0    | 154  | 0    | 0    | 0    | 0    | 0    | 0    | 0    |
| Bergeyella                                 | 0    | 0    | 0    | 0    | 0    | 0    | 0    | 0    | 0    | 0    | 0    | 0    | 0    | 0    | 0    | 0    | 0    | 0    | 0    | 0    | 0    | 0    |
| Actinotignum schaalii/timonense            | 0    | 0    | 0    | 0    | 0    | 0    | 0    | 0    | 0    | 0    | 0    | 0    | 0    | 0    | 0    | 0    | 0    | 0    | 0    | 0    | 0    | 0    |
| Klebsiella aerogenes/Kluyvera cryocrescens | 0    | 0    | 0    | 0    | 0    | 0    | 0    | 0    | 0    | 0    | 0    | 0    | 0    | 0    | 0    | 0    | 0    | 0    | 0    | 0    | 0    | 0    |
| Rothia mucilaginosa                        | 79   | 0    | 0    | 0    | 0    | 0    | 0    | 0    | 0    | 0    | 0    | 0    | 0    | 0    | 0    | 0    | 0    | 0    | 0    | 0    | 0    | 0    |
| Solobacterium moorei                       | 0    | 0    | 0    | 0    | 0    | 0    | 0    | 0    | 0    | 0    | 0    | 0    | 0    | 0    | 0    | 0    | 0    | 0    | 0    | 0    | 0    | 0    |
| Mageeibacillus indolicus                   | 0    | 0    | 0    | 0    | 0    | 0    | 0    | 0    | 0    | 0    | 0    | 0    | 0    | 0    | 0    | 0    | 0    | 0    | 0    | 0    | 0    | 0    |
| Serratia urelytica                         | 0    | 0    | 0    | 0    | 0    | 0    | 0    | 0    | 0    | 0    | 0    | 0    | 0    | 0    | 0    | 0    | 0    | 0    | 0    | 0    | 0    | 0    |
| Peptoniphilus obesi                        | 0    | 0    | 0    | 0    | 0    | 0    | 0    | 0    | 38   | 0    | 0    | 0    | 0    | 0    | 0    | 0    | 0    | 0    | 0    | 0    | 0    | 0    |
| Peptoniphilus harei/phoceensis             | 0    | 0    | 0    | 0    | 0    | 0    | 0    | 0    | 0    | 0    | 0    | 0    | 0    | 0    | 0    | 0    | 0    | 0    | 0    | 0    | 0    | 0    |
| Corynebacterium atypicum                   | 0    | 0    | 0    | 0    | 0    | 0    | 0    | 0    | 0    | 0    | 0    | 0    | 0    | 967  | 0    | 0    | 0    | 0    | 0    | 0    | 0    | 0    |
| Atopobium minutum                          | 0    | 0    | 0    | 0    | 0    | 0    | 0    | 0    | 0    | 0    | 0    | 0    | 0    | 0    | 66   | 0    | 0    | 0    | 0    | 0    | 0    | 0    |
| Corynebacterium genitalium                 | 0    | 0    | 0    | 0    | 0    | 0    | 0    | 93   | 0    | 0    | 0    | 0    | 0    | 0    | 0    | 0    | 61   | 0    | 0    | 0    | 0    | 0    |
| Bifidobacterium tsurumiense                | 0    | 0    | 0    | 0    | 0    | 0    | 0    | 0    | 0    | 0    | 0    | 0    | 0    | 0    | 0    | 0    | 0    | 0    | 0    | 0    | 0    | 0    |
| Micrococcus                                | 0    | 0    | 0    | 0    | 0    | 0    | 0    | 0    | 0    | 0    | 0    | 0    | 0    | 0    | 0    | 0    | 0    | 0    | 0    | 0    | 0    | 0    |
| Megasphaera genomsp. type_1                | 0    | 0    | 0    | 0    | 0    | 0    | 0    | 0    | 0    | 0    | 0    | 0    | 0    | 0    | 0    | 0    | 0    | 0    | 0    | 0    | 0    | 0    |
| Enhydrobacter                              | 0    | 0    | 0    | 0    | 0    | 0    | 0    | 0    | 0    | 0    | 0    | 0    | 0    | 0    | 0    | 0    | 0    | 0    | 0    | 0    | 0    | 0    |
| Fastidiosipila sanguinis                   | 0    | 31   | 0    | 0    | 0    | 0    | 190  | 0    | 29   | 0    | 0    | 0    | 0    | 0    | 0    | 0    | 0    | 0    | 0    | 0    | 0    | 0    |
| Prevotellamassilia                         | 0    | 0    | 0    | 0    | 0    | 0    | 0    | 0    | 0    | 0    | 0    | 0    | 0    | 0    | 0    | 0    | 0    | 0    | 0    | 0    | 0    | 0    |
| Peptostreptococcaceae                      | 0    | 0    | 0    | 0    | 0    | 0    | 0    | 0    | 0    | 0    | 0    | 0    | 0    | 0    | 0    | 0    | 0    | 0    | 0    | 0    | 0    | 0    |
| Morganella morganii                        | 0    | 0    | 0    | 0    | 0    | 0    | 0    | 0    | 0    | 0    | 0    | 0    | 0    | 0    | 0    | 0    | 0    | 0    | 0    | 0    | 0    | 0    |
| Neofamilia                                 | 0    | 0    | 0    | 0    | 0    | 0    | 0    | 0    | 0    | 0    | 0    | 0    | 0    | 0    | 0    | 0    | 0    | 0    | 0    | 0    | 0    | 0    |
| Pseudoclavibacter bifida                   | 0    | 0    | 0    | 0    | 0    | 0    | 0    | 74   | 0    | 0    | 0    | 0    | 0    | 0    | 0    | 36   | 0    | 0    | 0    | 0    | 0    | 0    |
| Helcococcus                                | 0    | 0    | 0    | 0    | 0    | 0    | 0    | 0    | 0    | 0    | 0    | 0    | 0    | 0    | 0    | 0    | 0    | 0    | 0    | 0    | 0    | 0    |
| Brevibacterium ravenburgense               | 0    | 0    | 0    | 0    | 0    | 0    | 0    | 169  | 0    | 0    | 0    | 0    | 0    | 0    | 0    | 0    | 71   | 0    | 0    | 0    | 0    | 0    |
| Moryella indoligenes                       | 0    | 0    | 0    | 0    | 0    | 0    | 0    | 0    | 0    | 0    | 0    | 0    | 0    | 0    | 0    | 0    | 0    | 0    | 0    | 0    | 0    | 0    |
| Olegusella massiliensis                    | 0    | 0    | 0    | 0    | 0    | 0    | 0    | 0    | 0    | 0    | 0    | 0    | 0    | 0    | 0    | 0    | 0    | 0    | 0    | 0    | 0    | 0    |
| Morococcus cerebrosus                      | 0    | 0    | 0    | 0    | 0    | 0    | 0    | 0    | 0    | 0    | 0    | 0    | 0    | 0    | 0    | 0    | 0    | 0    | 0    | 0    | 0    | 0    |
| Prevotella scopos                          | 0    | 0    | 0    | 0    | 0    | 0    | 0    | 0    | 0    | 0    | 0    | 0    | 0    | 0    | 0    | 0    | 0    | 0    | 0    | 0    | 0    | 0    |
| Veillonella parvula/tobetsuensis           | 0    | 0    | 0    | 0    | 0    | 0    | 0    | 0    | 0    | 0    | 0    | 0    | 45   | 0    | 0    | 0    | 0    | 0    | 0    | 0    | 0    | 0    |
| Moryella                                   | 0    | 0    | 0    | 0    | 0    | 0    | 0    | 0    | 0    | 0    | 0    | 0    | 0    | 0    | 0    | 0    | 0    | 0    | 0    | 0    | 0    | 0    |
| Atopobium parvulum                         | 0    | 0    | 0    | 0    | 0    | 0    | 0    | 0    | 0    | 0    | 0    | 0    | 0    | 0    | 0    | 0    | 0    | 0    | 0    | 0    | 0    | 0    |
| Serratia marcescens                        | 0    | 0    | 0    | 0    | 0    | 0    | 0    | 0    | 0    | 0    | 0    | 0    | 0    | 0    | 0    | 0    | 0    | 0    | 0    | 0    | 0    | 0    |
| Collinsella aerofaciens                    | 0    | 0    | 0    | 0    | 0    | 0    | 0    | 0    | 0    | 0    | 0    | 0    | 0    | 0    | 0    | 0    | 0    | 0    | 0    | 0    | 0    | 0    |
| Curvibacter                                | 0    | 0    | 0    | 0    | 0    | 0    | 0    | 0    | 0    | 0    | 0    | 0    | 0    | 0    | 0    | 0    | 0    | 0    | 0    | 0    | 0    | 0    |
| Rothia dentocariosa                        | 0    | 0    | 0    | 0    | 0    | 0    | 0    | 0    | 0    | 0    | 0    | 0    | 0    | 0    | 0    | 0    | 0    | 0    | 0    | 0    | 0    | 0    |
| Prevotella bergensis                       | 0    | 0    | 0    | 0    | 0    | 0    | 0    | 0    | 176  | 0    | 0    | 0    | 0    | 0    | 35   | 0    | 0    | 0    | 0    | 0    | 0    | 0    |
| Corynebacterium sundsvallense              | 0    | 0    | 0    | 0    | 0    | 27   | 0    | 206  | 0    | 0    | 0    | 0    | 0    | 0    | 0    | 0    | 0    | 28   | 0    | 0    | 0    | 0    |



Samples S254 - S281

| Species                                       | S254 | S255 | S256 | S257 | S258 | S260 | S261 | S262 | S264 | S266 | S267 | S268 | S269 | S270 | S271 | S272 | S273 | S274 | S276 | S277 | S279 | S281 |
|-----------------------------------------------|------|------|------|------|------|------|------|------|------|------|------|------|------|------|------|------|------|------|------|------|------|------|
| Coriobacteria                                 | 0    | 0    | 0    | 0    | 0    | 0    | 0    | 0    | 0    | 0    | 0    | 0    | 0    | 0    | 0    | 0    | 0    | 0    | 0    | 0    | 0    | 0    |
| Neisseria meningitidis                        | 0    | 0    | 0    | 0    | 0    | 0    | 0    | 0    | 0    | 0    | 0    | 0    | 0    | 0    | 0    | 0    | 0    | 0    | 0    | 0    | 0    | 0    |
| Dermacoccus nishinomiyaensis                  | 0    | 0    | 0    | 0    | 0    | 0    | 0    | 0    | 0    | 0    | 0    | 0    | 0    | 0    | 0    | 0    | 0    | 0    | 0    | 0    | 0    | 0    |
| Leptotrichia                                  | 0    | 0    | 0    | 0    | 0    | 0    | 0    | 0    | 0    | 0    | 0    | 0    | 0    | 0    | 0    | 0    | 0    | 0    | 0    | 0    | 0    | 0    |
| Microbacteriaceae                             | 0    | 0    | 0    | 0    | 0    | 0    | 0    | 0    | 0    | 0    | 0    | 0    | 0    | 0    | 0    | 0    | 0    | 0    | 0    | 0    | 0    | 0    |
| Klebsiella pneumoniae/variiicola              | 0    | 0    | 0    | 0    | 0    | 0    | 0    | 0    | 0    | 0    | 0    | 0    | 0    | 0    | 0    | 0    | 0    | 0    | 0    | 0    | 0    | 0    |
| Hafnia alvei                                  | 0    | 0    | 0    | 0    | 0    | 0    | 0    | 0    | 0    | 0    | 0    | 0    | 0    | 0    | 0    | 0    | 0    | 0    | 0    | 0    | 0    | 0    |
| Caulobacter                                   | 0    | 0    | 0    | 0    | 0    | 0    | 0    | 0    | 0    | 0    | 0    | 0    | 0    | 0    | 0    | 0    | 0    | 0    | 0    | 0    | 0    | 0    |
| Lactobacillus reuteri                         | 0    | 0    | 0    | 0    | 0    | 0    | 0    | 0    | 0    | 0    | 0    | 0    | 0    | 0    | 0    | 0    | 0    | 0    | 0    | 0    | 0    | 0    |
| Gemella morbillorum                           | 0    | 0    | 0    | 0    | 0    | 0    | 0    | 0    | 0    | 0    | 0    | 0    | 0    | 0    | 0    | 0    | 0    | 0    | 0    | 0    | 0    | 0    |
| Rothia                                        | 0    | 0    | 0    | 0    | 0    | 0    | 0    | 109  | 0    | 0    | 0    | 0    | 0    | 0    | 0    | 0    | 0    | 0    | 0    | 0    | 0    | 0    |
| Campylobacter                                 | 0    | 0    | 0    | 0    | 0    | 0    | 0    | 0    | 0    | 0    | 0    | 0    | 0    | 0    | 0    | 0    | 0    | 0    | 0    | 0    | 0    | 0    |
| Prevotella genogroup 3                        | 0    | 0    | 0    | 0    | 0    | 0    | 0    | 0    | 0    | 0    | 0    | 0    | 0    | 0    | 0    | 0    | 0    | 0    | 0    | 0    | 0    | 0    |
| Staphylococcus warneri                        | 0    | 0    | 0    | 0    | 0    | 0    | 0    | 167  | 0    | 0    | 0    | 0    | 0    | 0    | 0    | 0    | 0    | 0    | 0    | 0    | 0    | 0    |
| Blautia wexlerae                              | 0    | 0    | 0    | 0    | 0    | 0    | 0    | 0    | 0    | 0    | 0    | 0    | 0    | 0    | 0    | 0    | 0    | 0    | 0    | 0    | 0    | 0    |
| Lachnoanaerobaculum                           | 0    | 0    | 0    | 0    | 0    | 0    | 0    | 0    | 0    | 0    | 0    | 0    | 0    | 0    | 0    | 0    | 0    | 0    | 0    | 0    | 0    | 0    |
| Anaerococcus hydrogenalis/senegalensis        | 0    | 0    | 0    | 0    | 0    | 0    | 0    | 0    | 0    | 0    | 0    | 0    | 0    | 0    | 0    | 0    | 0    | 0    | 0    | 0    | 0    | 0    |
| Brevibacterium mcbrellneri                    | 0    | 0    | 0    | 0    | 0    | 0    | 0    | 69   | 0    | 0    | 0    | 0    | 0    | 0    | 0    | 0    | 0    | 0    | 0    | 0    | 0    | 0    |
| Corynebacterium glaucum                       | 0    | 0    | 0    | 0    | 0    | 0    | 0    | 0    | 0    | 0    | 0    | 0    | 0    | 0    | 0    | 0    | 0    | 0    | 0    | 0    | 0    | 0    |
| Prevotella salivae                            | 0    | 0    | 0    | 0    | 0    | 0    | 0    | 0    | 0    | 0    | 0    | 0    | 0    | 0    | 0    | 0    | 0    | 0    | 0    | 0    | 0    | 0    |
| Coriobacteriaceae                             | 0    | 0    | 0    | 0    | 0    | 0    | 0    | 0    | 0    | 0    | 0    | 0    | 0    | 0    | 0    | 0    | 0    | 0    | 0    | 0    | 0    | 0    |
| Bulleidia                                     | 0    | 0    | 0    | 0    | 0    | 0    | 0    | 0    | 0    | 0    | 0    | 0    | 0    | 0    | 27   | 0    | 0    | 0    | 0    | 0    | 0    | 0    |
| Peptococcus                                   | 0    | 0    | 0    | 0    | 0    | 0    | 0    | 0    | 774  | 0    | 0    | 0    | 0    | 0    | 0    | 0    | 0    | 0    | 0    | 0    | 0    | 0    |
| Serratia marcescens/nematodiphila             | 0    | 0    | 0    | 0    | 0    | 0    | 0    | 0    | 0    | 0    | 0    | 0    | 0    | 0    | 0    | 0    | 0    | 0    | 0    | 0    | 0    | 0    |
| Leptotrichia wadei                            | 0    | 0    | 0    | 0    | 0    | 0    | 0    | 0    | 0    | 0    | 0    | 0    | 0    | 0    | 0    | 0    | 0    | 0    | 0    | 0    | 0    | 0    |
| Neisseriaceae                                 | 0    | 0    | 0    | 0    | 0    | 0    | 0    | 0    | 0    | 0    | 0    | 0    | 0    | 0    | 0    | 0    | 0    | 0    | 0    | 0    | 0    | 0    |
| Aerococcus sanguinicola                       | 0    | 0    | 0    | 0    | 0    | 0    | 0    | 0    | 0    | 0    | 0    | 0    | 0    | 0    | 0    | 0    | 0    | 0    | 0    | 0    | 0    | 0    |
| Criobacterium bergeronii                      | 0    | 0    | 0    | 0    | 0    | 0    | 0    | 0    | 0    | 0    | 0    | 0    | 0    | 0    | 0    | 294  | 0    | 0    | 0    | 0    | 0    | 0    |
| Brevibacterium luteolum                       | 0    | 0    | 0    | 0    | 0    | 0    | 0    | 0    | 0    | 0    | 0    | 0    | 0    | 0    | 0    | 0    | 0    | 0    | 0    | 0    | 0    | 0    |
| Klebsiella pneumoniae                         | 0    | 0    | 0    | 0    | 0    | 0    | 0    | 0    | 0    | 0    | 0    | 0    | 0    | 0    | 0    | 0    | 0    | 0    | 0    | 0    | 0    | 0    |
| Actinomyces oris/viscosus                     | 0    | 0    | 0    | 0    | 0    | 0    | 0    | 0    | 0    | 0    | 0    | 0    | 0    | 0    | 0    | 0    | 0    | 0    | 0    | 0    | 0    | 0    |
| Mycobacterium chelonae complex                | 0    | 0    | 0    | 0    | 0    | 0    | 0    | 0    | 0    | 0    | 0    | 0    | 0    | 0    | 0    | 0    | 0    | 0    | 0    | 0    | 0    | 0    |
| Corynebacterium jeddahense                    | 0    | 0    | 0    | 0    | 0    | 0    | 0    | 0    | 0    | 0    | 0    | 0    | 0    | 0    | 0    | 0    | 0    | 0    | 0    | 0    | 0    | 0    |
| Peptostreptococcus stomatis                   | 0    | 0    | 0    | 0    | 0    | 0    | 0    | 0    | 0    | 0    | 0    | 0    | 0    | 0    | 0    | 0    | 0    | 0    | 0    | 0    | 0    | 0    |
| Megasphaera                                   | 0    | 0    | 0    | 0    | 0    | 0    | 0    | 0    | 0    | 0    | 0    | 0    | 0    | 0    | 0    | 0    | 0    | 0    | 0    | 0    | 0    | 0    |
| Campylobacter rectus/showae                   | 0    | 0    | 0    | 0    | 0    | 0    | 0    | 0    | 0    | 0    | 0    | 0    | 0    | 0    | 0    | 0    | 0    | 0    | 0    | 0    | 0    | 0    |
| Staphylococcus carnosus/condimenti            | 0    | 0    | 0    | 0    | 0    | 0    | 0    | 0    | 0    | 0    | 0    | 0    | 0    | 0    | 0    | 0    | 0    | 0    | 27   | 0    | 0    | 0    |
| Prevotella pallens                            | 0    | 0    | 0    | 0    | 0    | 0    | 0    | 0    | 0    | 0    | 0    | 0    | 0    | 0    | 0    | 0    | 0    | 0    | 0    | 0    | 0    | 0    |
| Prolinoborus fasciculus/Acinetobacter lwoffii | 0    | 0    | 0    | 0    | 0    | 0    | 0    | 0    | 0    | 0    | 0    | 0    | 0    | 0    | 0    | 0    | 0    | 0    | 0    | 0    | 0    | 0    |
| Staphylococcus nepalensis                     | 0    | 0    | 0    | 0    | 0    | 0    | 0    | 0    | 0    | 0    | 0    | 0    | 0    | 0    | 0    | 0    | 0    | 174  | 0    | 0    | 0    | 0    |
| Staphylococcaceae                             | 0    | 0    | 0    | 0    | 0    | 0    | 0    | 0    | 0    | 0    | 0    | 0    | 0    | 0    | 0    | 0    | 0    | 0    | 0    | 0    | 0    | 0    |
| Cruoriaptor                                   | 0    | 0    | 0    | 0    | 0    | 0    | 0    | 0    | 0    | 0    | 0    | 0    | 0    | 0    | 0    | 0    | 0    | 0    | 0    | 0    | 0    | 0    |
| [Eubacterium] hallii                          | 0    | 0    | 0    | 0    | 0    | 0    | 0    | 0    | 0    | 0    | 0    | 0    | 0    | 0    | 0    | 0    | 0    | 0    | 0    | 0    | 0    | 0    |
| BVAB1 (species)                               | 0    | 0    | 0    | 0    | 0    | 0    | 0    | 0    | 0    | 0    | 0    | 0    | 0    | 0    | 0    | 0    | 0    | 0    | 0    | 0    | 0    | 0    |
| Stomatobaculum                                | 0    | 0    | 0    | 0    | 0    | 0    | 0    | 0    | 0    | 0    | 0    | 0    | 0    | 0    | 0    | 0    | 0    | 0    | 0    | 0    | 0    | 0    |
| Mycoplasma                                    | 0    | 0    | 0    | 0    | 0    | 0    | 0    | 0    | 0    | 0    | 0    | 0    | 0    | 0    | 0    | 0    | 0    | 0    | 0    | 0    | 0    | 0    |
| Catenibacterium mitsuokai                     | 0    | 0    | 0    | 0    | 0    | 0    | 0    | 0    | 0    | 0    | 0    | 0    | 0    | 0    | 0    | 0    | 0    | 0    | 0    | 0    | 0    | 0    |
| Veillonella parvula                           | 0    | 0    | 0    | 0    | 0    | 0    | 0    | 0    | 0    | 0    | 0    | 0    | 0    | 0    | 0    | 0    | 0    | 0    | 0    | 0    | 0    | 0    |
| Corynebacterium kroppenstedtii                | 0    | 0    | 0    | 0    | 0    | 0    | 0    | 0    | 0    | 0    | 0    | 0    | 0    | 0    | 0    | 0    | 0    | 0    | 0    | 0    | 0    | 0    |
| Eremococcus coleocola                         | 0    | 0    | 0    | 0    | 0    | 0    | 0    | 0    | 0    | 0    | 0    | 0    | 0    | 0    | 0    | 0    | 0    | 0    | 0    | 0    | 0    | 0    |
| Actinomyces europaeus                         | 0    | 0    | 0    | 0    | 0    | 0    | 194  | 0    | 0    | 0    | 0    | 0    | 0    | 0    | 0    | 0    | 0    | 0    | 0    | 0    | 0    | 0    |
| Peptoniphilus senegalensis                    | 0    | 0    | 0    | 0    | 0    | 0    | 0    | 0    | 0    | 0    | 0    | 0    | 0    | 0    | 0    | 0    | 0    | 0    | 0    | 0    | 0    | 0    |
| Corynebacterium afermentans/humii             | 0    | 0    | 0    | 0    | 0    | 0    | 0    | 0    | 0    | 0    | 0    | 0    | 0    | 0    | 0    | 0    | 0    | 0    | 0    | 0    | 0    | 0    |
| Acinetobacter                                 | 0    | 0    | 0    | 0    | 0    | 0    | 0    | 0    | 0    | 0    | 0    | 0    | 0    | 0    | 0    | 0    | 0    | 0    | 0    | 0    | 0    | 0    |
| Eggerthellaceae                               | 0    | 0    | 0    | 0    | 0    | 0    | 0    | 0    | 0    | 0    | 0    | 0    | 0    | 0    | 0    | 45   | 0    | 0    | 0    | 0    | 0    | 0    |
| Corynebacterium mucifaciens                   | 0    | 0    | 0    | 0    | 0    | 0    | 0    | 0    | 0    | 0    | 0    | 0    | 0    | 0    | 0    | 0    | 0    | 0    | 0    | 0    | 0    | 0    |
| Filifactor                                    | 0    | 0    | 0    | 0    | 0    | 0    | 0    | 0    | 0    | 0    | 0    | 0    | 0    | 0    | 0    | 0    | 0    | 0    | 0    | 0    | 0    | 0    |
| Ruminococcus faecis                           | 0    | 0    | 0    | 0    | 0    | 0    | 0    | 0    | 0    | 0    | 0    | 0    | 0    | 0    | 0    | 0    | 0    | 0    | 0    | 0    | 0    | 0    |
| Lactobacillus                                 | 0    | 0    | 0    | 0    | 0    | 0    | 0    | 0    | 0    | 0    | 0    | 0    | 0    | 0    | 0    | 0    | 0    | 0    | 0    | 0    | 0    | 0    |
| Peptoniphilus grossensis/rhinitidis           | 0    | 0    | 0    | 0    | 0    | 0    | 0    | 0    | 0    | 0    | 0    | 0    | 0    | 0    | 0    | 0    | 0    | 0    | 0    | 0    | 0    | 0    |
| Aerococcus urinaequi/viridans                 | 0    | 0    | 0    | 0    | 0    | 0    | 0    | 0    | 0    | 0    | 0    | 0    | 0    | 0    | 0    | 0    | 0    | 0    | 0    | 0    | 0    | 0    |
| Anaerostipes hadrus                           | 0    | 0    | 0    | 0    | 0    | 0    | 0    | 0    | 0    | 0    | 0    | 0    | 0    | 0    | 0    | 0    | 0    | 0    | 0    | 0    | 0    | 0    |
| Lagierella                                    | 0    | 0    | 0    | 0    | 0    | 0    | 0    | 0    | 247  | 0    | 0    | 0    | 0    | 0    | 0    | 0    | 0    | 0    | 0    | 0    | 0    | 0    |
| Neisseria cinerea/meningitidis                | 0    | 0    | 0    | 0    | 0    | 0    | 0    | 0    | 0    | 0    | 0    | 0    | 0    | 0    | 0    | 0    | 0    | 0    | 0    | 0    | 0    | 0    |
| Micrococcus lylae                             | 0    | 0    | 0    | 0    | 0    | 0    | 0    | 0    | 0    | 0    | 0    | 0    | 0    | 0    | 0    | 0    | 0    | 0    | 0    | 0    | 0    | 0    |
| Staphylococcus cohnii                         | 0    | 0    | 0    | 0    | 0    | 0    | 0    | 0    | 0    | 0    | 0    | 0    | 0    | 0    | 0    | 0    | 0    | 0    | 0    | 0    | 0    | 0    |
| Casaltella massiliensis                       | 0    | 0    | 0    | 0    | 0    | 0    | 0    | 0    | 179  | 0    | 0    | 0    | 0    | 0    | 0    | 0    | 0    | 0    | 0    | 0    | 0    | 0    |
| Stomatobaculum longum                         | 0    | 0    | 0    | 0    | 0    | 0    | 0    | 0    | 0    | 0    | 0    | 0    | 0    | 0    | 0    | 0    | 0    | 0    | 0    | 0    | 0    | 0    |
| Lautropia                                     | 0    | 0    | 0    | 0    | 0    | 0    | 0    | 0    | 0    | 0    | 0    | 0    | 0    | 0    | 0    | 0    | 0    | 0    | 0    | 0    | 0    | 0    |
| Fastidiosipila                                | 0    | 0    | 0    | 0    | 0    | 0    | 0    | 0    | 0    | 0    | 0    | 0    | 0    | 0    | 0    | 0    | 0    | 0    | 0    | 0    | 0    | 0    |

Samples S254 - S281

| Species                                      | S254 | S255 | S256 | S257 | S258 | S260 | S261 | S262 | S264 | S266 | S267 | S268 | S269 | S270 | S271 | S272 | S273 | S274 | S276 | S277 | S279 | S281 |
|----------------------------------------------|------|------|------|------|------|------|------|------|------|------|------|------|------|------|------|------|------|------|------|------|------|------|
| Corynebacterium durum                        | 0    | 0    | 0    | 0    | 0    | 0    | 0    | 0    | 0    | 0    | 0    | 0    | 0    | 0    | 0    | 0    | 0    | 0    | 0    | 0    | 0    | 0    |
| Actinomyces graevenitzi                      | 0    | 0    | 0    | 0    | 0    | 0    | 0    | 0    | 0    | 0    | 0    | 0    | 0    | 0    | 0    | 0    | 0    | 0    | 0    | 0    | 0    | 0    |
| Staphylococcus cohnii/saprophyticus          | 0    | 0    | 0    | 0    | 0    | 0    | 0    | 0    | 0    | 0    | 0    | 0    | 0    | 0    | 0    | 0    | 0    | 0    | 0    | 0    | 0    | 0    |
| Leptotrichia trevisanii                      | 0    | 0    | 0    | 0    | 0    | 0    | 0    | 0    | 0    | 0    | 0    | 0    | 0    | 0    | 0    | 0    | 0    | 0    | 0    | 0    | 0    | 0    |
| Candidatus Paraburkholderia calva            | 0    | 0    | 0    | 0    | 0    | 0    | 0    | 0    | 0    | 0    | 0    | 0    | 0    | 0    | 0    | 0    | 0    | 0    | 0    | 0    | 0    | 0    |
| Actinomyces urogenitalis                     | 0    | 0    | 0    | 0    | 0    | 0    | 0    | 0    | 0    | 0    | 0    | 0    | 0    | 0    | 0    | 0    | 0    | 0    | 0    | 0    | 0    | 0    |
| Clostridiales                                | 0    | 0    | 0    | 0    | 0    | 0    | 0    | 0    | 33   | 0    | 0    | 0    | 0    | 0    | 0    | 0    | 0    | 0    | 0    | 0    | 0    | 0    |
| Pasteurella caballi                          | 0    | 0    | 0    | 0    | 0    | 0    | 0    | 0    | 0    | 0    | 0    | 0    | 0    | 0    | 0    | 0    | 0    | 0    | 0    | 0    | 0    | 0    |
| Fusobacterium hwasookii/nucleatum            | 0    | 0    | 0    | 0    | 0    | 0    | 0    | 0    | 0    | 0    | 0    | 0    | 0    | 0    | 0    | 0    | 0    | 0    | 0    | 0    | 0    | 0    |
| Corynebacterium riegelii                     | 0    | 0    | 0    | 0    | 0    | 0    | 0    | 0    | 0    | 0    | 0    | 0    | 0    | 0    | 0    | 0    | 0    | 0    | 0    | 0    | 0    | 0    |
| Hafnia                                       | 0    | 0    | 0    | 0    | 0    | 0    | 0    | 0    | 0    | 0    | 0    | 0    | 0    | 0    | 0    | 0    | 0    | 0    | 0    | 0    | 0    | 0    |
| Staphylococcus equorum/saprophyticus/xylosum | 0    | 0    | 0    | 0    | 0    | 0    | 0    | 0    | 0    | 0    | 0    | 0    | 0    | 0    | 0    | 0    | 0    | 0    | 0    | 0    | 0    | 0    |
| Acinetobacter lwoffii                        | 0    | 0    | 0    | 0    | 0    | 0    | 0    | 0    | 0    | 0    | 0    | 0    | 0    | 0    | 0    | 0    | 0    | 0    | 0    | 0    | 0    | 0    |
| Micrococcus cohnii                           | 0    | 0    | 0    | 0    | 0    | 0    | 0    | 0    | 0    | 0    | 0    | 0    | 0    | 0    | 0    | 0    | 0    | 0    | 0    | 0    | 0    | 0    |
| Pseudoclavibacter faecalis                   | 0    | 0    | 0    | 0    | 0    | 0    | 0    | 0    | 0    | 0    | 0    | 0    | 0    | 0    | 0    | 0    | 0    | 0    | 0    | 0    | 0    | 0    |
| Leptotrichia buccalis                        | 0    | 0    | 0    | 0    | 0    | 0    | 0    | 0    | 0    | 0    | 0    | 0    | 0    | 0    | 0    | 0    | 0    | 0    | 0    | 0    | 0    | 0    |
| Actinomyces                                  | 0    | 0    | 0    | 0    | 0    | 0    | 0    | 0    | 0    | 0    | 0    | 0    | 0    | 0    | 0    | 0    | 0    | 0    | 0    | 0    | 0    | 0    |
| Fusobacterium nucleatum/periodonticum        | 0    | 0    | 0    | 0    | 0    | 0    | 0    | 0    | 0    | 0    | 0    | 0    | 0    | 0    | 0    | 0    | 0    | 0    | 0    | 0    | 0    | 0    |
| Lactobacillus saerimneri                     | 0    | 0    | 0    | 0    | 0    | 0    | 0    | 0    | 0    | 0    | 0    | 0    | 0    | 0    | 0    | 0    | 0    | 0    | 0    | 0    | 0    | 0    |
| Actinomycetaceae                             | 0    | 0    | 0    | 0    | 0    | 0    | 0    | 0    | 0    | 0    | 0    | 0    | 0    | 0    | 0    | 0    | 0    | 0    | 0    | 0    | 0    | 0    |
| Dialister                                    | 0    | 0    | 0    | 0    | 0    | 0    | 0    | 0    | 0    | 0    | 0    | 0    | 0    | 0    | 0    | 0    | 0    | 0    | 0    | 0    | 0    | 0    |
| Neisseria mucosa/subflava                    | 0    | 0    | 0    | 0    | 0    | 0    | 0    | 0    | 0    | 0    | 0    | 0    | 0    | 0    | 0    | 0    | 0    | 0    | 0    | 0    | 0    | 0    |
| Paracoccus                                   | 0    | 0    | 0    | 0    | 0    | 0    | 0    | 0    | 0    | 0    | 0    | 0    | 0    | 0    | 0    | 0    | 0    | 0    | 0    | 0    | 0    | 0    |
| Acinetobacter haemolyticus/johnsonii         | 0    | 0    | 0    | 0    | 0    | 0    | 0    | 0    | 0    | 0    | 0    | 0    | 0    | 0    | 0    | 0    | 0    | 0    | 0    | 0    | 0    | 0    |
| Neisseria subflava                           | 0    | 0    | 0    | 0    | 0    | 0    | 0    | 0    | 0    | 0    | 0    | 0    | 0    | 0    | 0    | 0    | 0    | 0    | 0    | 0    | 0    | 0    |
| Acinetobacter proteolyticus                  | 0    | 0    | 0    | 0    | 0    | 0    | 0    | 0    | 0    | 0    | 0    | 0    | 0    | 0    | 0    | 0    | 0    | 0    | 0    | 0    | 0    | 0    |
| Dorea formicigenerans                        | 0    | 0    | 0    | 0    | 0    | 0    | 0    | 0    | 0    | 0    | 0    | 0    | 0    | 0    | 0    | 0    | 0    | 0    | 0    | 0    | 0    | 0    |
| Corynebacterium tuscaniense                  | 0    | 0    | 0    | 0    | 0    | 0    | 0    | 0    | 0    | 0    | 0    | 0    | 0    | 0    | 0    | 0    | 0    | 0    | 0    | 0    | 0    | 0    |
| Massiliomicrobiota timonensis                | 0    | 0    | 0    | 0    | 0    | 0    | 0    | 0    | 0    | 0    | 0    | 0    | 0    | 0    | 0    | 0    | 0    | 0    | 0    | 0    | 0    | 0    |
| Fusobacterium hwasookii                      | 0    | 0    | 0    | 0    | 0    | 0    | 0    | 0    | 0    | 0    | 0    | 0    | 0    | 0    | 0    | 0    | 0    | 0    | 0    | 0    | 0    | 0    |
| Pseudoglutamicibacter albus                  | 0    | 0    | 0    | 0    | 0    | 0    | 0    | 0    | 0    | 0    | 0    | 0    | 0    | 0    | 0    | 0    | 0    | 0    | 0    | 0    | 0    | 0    |
| Clostridiales Family XIII. Incertae Sedis    | 0    | 0    | 0    | 0    | 0    | 0    | 0    | 0    | 0    | 0    | 0    | 0    | 0    | 0    | 0    | 0    | 0    | 0    | 0    | 0    | 0    | 0    |
| Kocuria marina/rhizophila                    | 0    | 0    | 0    | 0    | 0    | 0    | 0    | 0    | 0    | 0    | 0    | 0    | 0    | 0    | 0    | 0    | 0    | 0    | 0    | 0    | 0    | 0    |
| Kocuria                                      | 0    | 0    | 0    | 0    | 0    | 0    | 0    | 0    | 0    | 0    | 0    | 0    | 0    | 0    | 0    | 0    | 39   | 0    | 0    | 0    | 0    | 0    |
| Alloprevotella rava                          | 0    | 0    | 0    | 0    | 0    | 0    | 0    | 0    | 0    | 0    | 0    | 0    | 0    | 0    | 0    | 0    | 0    | 0    | 0    | 0    | 0    | 0    |
| Staphylococcus pettenkoferi                  | 0    | 0    | 0    | 0    | 0    | 0    | 0    | 0    | 0    | 0    | 0    | 0    | 0    | 0    | 0    | 0    | 0    | 0    | 0    | 0    | 0    | 0    |
| Streptococcus pseudoporcinus                 | 0    | 0    | 0    | 0    | 0    | 0    | 0    | 0    | 0    | 0    | 0    | 0    | 0    | 0    | 0    | 0    | 0    | 0    | 0    | 0    | 0    | 0    |
| Kingella                                     | 0    | 0    | 0    | 0    | 0    | 0    | 0    | 0    | 0    | 0    | 0    | 0    | 0    | 0    | 0    | 0    | 0    | 0    | 0    | 0    | 0    | 0    |
| Eikenella                                    | 0    | 0    | 0    | 0    | 0    | 0    | 0    | 0    | 0    | 0    | 0    | 0    | 0    | 0    | 0    | 0    | 0    | 0    | 0    | 0    | 0    | 0    |
| Actinomyces odontolyticus                    | 0    | 0    | 0    | 0    | 0    | 0    | 0    | 0    | 0    | 0    | 0    | 0    | 0    | 0    | 0    | 0    | 0    | 0    | 0    | 0    | 0    | 0    |
| Corynebacterium sphenisci                    | 0    | 0    | 0    | 0    | 0    | 0    | 0    | 0    | 0    | 0    | 0    | 0    | 0    | 0    | 0    | 0    | 0    | 0    | 0    | 0    | 0    | 0    |
| Cutibacterium                                | 0    | 0    | 0    | 0    | 0    | 0    | 0    | 0    | 0    | 0    | 0    | 0    | 0    | 0    | 0    | 0    | 0    | 0    | 0    | 0    | 0    | 0    |
| Staphylococcus xylosum                       | 0    | 0    | 0    | 0    | 0    | 0    | 0    | 0    | 0    | 0    | 0    | 0    | 0    | 0    | 0    | 0    | 0    | 0    | 0    | 0    | 0    | 0    |
| Burkholderiales                              | 0    | 0    | 0    | 0    | 0    | 0    | 0    | 0    | 0    | 0    | 0    | 0    | 0    | 0    | 0    | 0    | 0    | 0    | 0    | 0    | 0    | 0    |
| Massiliomicrobiota/Mycoplasma                | 0    | 0    | 0    | 0    | 0    | 0    | 0    | 0    | 0    | 0    | 0    | 0    | 0    | 0    | 0    | 0    | 0    | 0    | 0    | 0    | 0    | 0    |
| Bacteroidales                                | 0    | 0    | 0    | 0    | 0    | 0    | 0    | 0    | 51   | 0    | 0    | 0    | 0    | 0    | 0    | 0    | 0    | 0    | 0    | 0    | 0    | 0    |
| Campylobacter fetus                          | 0    | 0    | 0    | 0    | 0    | 0    | 0    | 0    | 0    | 0    | 0    | 0    | 0    | 0    | 0    | 0    | 0    | 0    | 0    | 0    | 0    | 0    |
| Prevotella aurantiaca                        | 0    | 0    | 0    | 0    | 0    | 0    | 0    | 0    | 0    | 0    | 0    | 0    | 0    | 0    | 0    | 0    | 0    | 0    | 0    | 0    | 0    | 0    |
| Corynebacterium freneyi/xerosis              | 0    | 0    | 0    | 0    | 0    | 0    | 0    | 0    | 0    | 0    | 0    | 0    | 0    | 0    | 0    | 0    | 0    | 0    | 0    | 0    | 0    | 0    |
| Aerococcaceae                                | 0    | 0    | 0    | 0    | 0    | 0    | 0    | 0    | 0    | 0    | 0    | 0    | 0    | 0    | 0    | 0    | 0    | 0    | 0    | 0    | 0    | 0    |
| Moraxella lacunata                           | 0    | 0    | 0    | 0    | 0    | 0    | 0    | 0    | 0    | 0    | 0    | 0    | 0    | 0    | 0    | 0    | 0    | 0    | 0    | 0    | 0    | 0    |
| Corynebacterium accolens/macginleyi          | 0    | 0    | 0    | 0    | 0    | 0    | 0    | 0    | 0    | 0    | 0    | 0    | 0    | 0    | 0    | 0    | 0    | 0    | 0    | 0    | 0    | 0    |
| Massilia aurea                               | 0    | 0    | 0    | 0    | 0    | 0    | 0    | 0    | 0    | 0    | 0    | 0    | 0    | 0    | 0    | 0    | 0    | 0    | 0    | 0    | 0    | 0    |
| Corynebacterium casei                        | 0    | 0    | 0    | 0    | 0    | 0    | 0    | 0    | 0    | 0    | 0    | 0    | 0    | 0    | 0    | 0    | 0    | 0    | 0    | 0    | 0    | 0    |
| Helcococcus sueciensis                       | 0    | 0    | 0    | 0    | 0    | 0    | 0    | 0    | 0    | 0    | 0    | 0    | 0    | 0    | 0    | 0    | 0    | 0    | 0    | 0    | 0    | 0    |
| Lactobacillus casei/rhannosus                | 0    | 0    | 0    | 0    | 0    | 0    | 0    | 0    | 0    | 0    | 0    | 0    | 0    | 0    | 0    | 0    | 0    | 0    | 0    | 0    | 0    | 0    |
| Holdemanella biformis                        | 0    | 0    | 0    | 0    | 0    | 0    | 0    | 0    | 0    | 0    | 0    | 0    | 0    | 0    | 0    | 0    | 0    | 0    | 0    | 0    | 0    | 0    |
| Pelistega                                    | 0    | 0    | 0    | 0    | 0    | 0    | 0    | 0    | 0    | 0    | 0    | 0    | 0    | 0    | 0    | 0    | 0    | 0    | 0    | 0    | 0    | 0    |
| Actinomyces massiliensis                     | 0    | 0    | 0    | 0    | 0    | 0    | 0    | 0    | 0    | 0    | 0    | 0    | 0    | 0    | 0    | 0    | 0    | 0    | 0    | 0    | 0    | 0    |
| Massilia                                     | 0    | 0    | 0    | 0    | 0    | 0    | 0    | 0    | 0    | 0    | 0    | 0    | 0    | 0    | 0    | 0    | 0    | 0    | 0    | 0    | 0    | 0    |
| Staphylococcus equorum/xylosum               | 0    | 0    | 0    | 0    | 0    | 0    | 0    | 0    | 0    | 0    | 0    | 0    | 0    | 0    | 0    | 0    | 0    | 0    | 0    | 0    | 0    | 0    |
| Streptococcus                                | 0    | 0    | 0    | 0    | 0    | 0    | 0    | 0    | 0    | 0    | 0    | 0    | 0    | 0    | 0    | 0    | 0    | 0    | 0    | 0    | 0    | 0    |
| Cutibacterium avidum                         | 0    | 0    | 0    | 0    | 0    | 0    | 0    | 0    | 0    | 0    | 0    | 0    | 0    | 0    | 0    | 0    | 0    | 0    | 0    | 0    | 0    | 0    |

Samples S282 - S311

| Species                                             | S282  | S283  | S285 | S286  | S289  | S290  | S291  | S292  | S293  | S295  | S296  | S297  | S298  | S299 | S301  | S302  | S306 | S307  | S308  | S309 | S310  | S311  |
|-----------------------------------------------------|-------|-------|------|-------|-------|-------|-------|-------|-------|-------|-------|-------|-------|------|-------|-------|------|-------|-------|------|-------|-------|
| Streptococcus mitis group                           | 4246  | 62    | 1190 | 20176 | 0     | 40    | 37    | 25    | 79003 | 315   | 0     | 31    | 0     | 0    | 665   | 0     | 3097 | 9754  | 31863 | 239  | 43    | 18869 |
| Lactobacillus iners                                 | 0     | 0     | 0    | 0     | 0     | 0     | 0     | 0     | 0     | 0     | 0     | 0     | 0     | 0    | 0     | 0     | 0    | 0     | 0     | 0    | 0     | 0     |
| Gardnerella vaginalis                               | 27704 | 0     | 0    | 0     | 0     | 0     | 0     | 0     | 0     | 0     | 0     | 0     | 0     | 1122 | 0     | 27    | 0    | 0     | 0     | 0    | 7811  | 0     |
| Corynebacterium pseudogenitalium/tuberculostrictum  | 644   | 159   | 73   | 205   | 32    | 2090  | 37    | 126   | 946   | 1255  | 774   | 348   | 366   | 154  | 4184  | 281   | 261  | 0     | 721   | 46   | 1050  | 291   |
| Streptococcus agalactiae                            | 0     | 0     | 0    | 0     | 0     | 0     | 3321  | 0     | 0     | 0     | 11418 | 0     | 0     | 0    | 0     | 0     | 0    | 0     | 0     | 0    | 0     | 0     |
| Veillonella montpellierensis                        | 0     | 0     | 0    | 0     | 0     | 0     | 0     | 0     | 0     | 0     | 0     | 0     | 0     | 335  | 0     | 0     | 0    | 0     | 0     | 0    | 0     | 0     |
| Streptococcus anginosus                             | 219   | 0     | 0    | 0     | 2916  | 0     | 0     | 0     | 0     | 0     | 0     | 27    | 88    | 0    | 0     | 11022 | 0    | 0     | 0     | 0    | 0     | 0     |
| Chlamydia trachomatis                               | 0     | 38566 | 0    | 0     | 12485 | 0     | 0     | 348   | 0     | 0     | 0     | 0     | 0     | 1608 | 27855 | 0     | 7151 | 0     | 0     | 0    | 653   | 0     |
| Haemophilus parainfluenzae                          | 0     | 0     | 0    | 5511  | 26    | 0     | 26688 | 0     | 0     | 10848 | 0     | 0     | 0     | 0    | 0     | 0     | 3207 | 0     | 0     | 0    | 540   | 0     |
| Finegoldia magna                                    | 0     | 40    | 1664 | 17041 | 2509  | 178   | 0     | 0     | 0     | 167   | 4596  | 189   | 1834  | 99   | 562   | 1080  | 1073 | 0     | 0     | 0    | 162   | 27    |
| Peptoniphilus asaccharolyticus/grossensis/harei     | 0     | 43    | 1169 | 118   | 7498  | 93    | 0     | 4601  | 0     | 11935 | 0     | 135   | 2571  | 0    | 0     | 88    | 2610 | 0     | 0     | 0    | 1740  | 0     |
| Sneathia amnii                                      | 0     | 0     | 0    | 0     | 0     | 0     | 0     | 0     | 0     | 0     | 0     | 0     | 0     | 0    | 0     | 0     | 0    | 0     | 0     | 0    | 0     | 0     |
| Staphylococcus caprae/cohnii/epidermidis            | 0     | 27    | 0    | 85    | 42    | 297   | 428   | 0     | 330   | 701   | 924   | 232   | 0     | 26   | 145   | 76    | 0    | 0     | 33    | 0    | 220   | 0     |
| Gemella haemolysans/taiwanensis                     | 333   | 0     | 97   | 0     | 0     | 0     | 0     | 0     | 304   | 0     | 0     | 0     | 0     | 0    | 0     | 427   | 0    | 0     | 0     | 0    | 0     | 0     |
| Sneathia sanguinigena                               | 0     | 0     | 0    | 0     | 0     | 0     | 0     | 0     | 0     | 0     | 0     | 0     | 0     | 3931 | 0     | 0     | 0    | 0     | 0     | 0    | 0     | 0     |
| Mycoplasma genitalium                               | 0     | 0     | 0    | 0     | 0     | 0     | 0     | 0     | 0     | 0     | 0     | 0     | 0     | 0    | 0     | 0     | 0    | 0     | 0     | 0    | 0     | 0     |
| Mycoplasma penetrans                                | 0     | 0     | 0    | 0     | 0     | 11900 | 0     | 0     | 0     | 0     | 0     | 0     | 0     | 0    | 0     | 0     | 0    | 17942 | 0     | 9953 | 0     | 0     |
| Haemophilus haemolyticus/quentini                   | 0     | 0     | 0    | 0     | 0     | 0     | 0     | 264   | 0     | 0     | 0     | 0     | 0     | 0    | 0     | 0     | 0    | 0     | 0     | 0    | 0     | 10381 |
| Corynebacterium pyruvicoproductens                  | 0     | 0     | 0    | 0     | 37    | 0     | 0     | 0     | 0     | 3460  | 163   | 0     | 40    | 0    | 0     | 0     | 0    | 0     | 0     | 0    | 0     | 0     |
| Anaerococcus prevotii/tetradicus                    | 0     | 0     | 533  | 1207  | 42    | 572   | 0     | 84    | 0     | 95    | 1721  | 0     | 0     | 267  | 0     | 261   | 7003 | 0     | 0     | 0    | 11769 | 0     |
| Haemophilus influenzae                              | 1452  | 0     | 88   | 0     | 0     | 0     | 0     | 0     | 57    | 0     | 0     | 50136 | 0     | 0    | 0     | 0     | 0    | 0     | 948   | 0    | 125   | 0     |
| Staphylococcus epidermidis/hominis                  | 37    | 0     | 0    | 60    | 0     | 0     | 16195 | 0     | 197   | 280   | 73    | 0     | 0     | 420  | 230   | 0     | 0    | 0     | 0     | 0    | 27    | 0     |
| Atopobium vaginae                                   | 0     | 0     | 0    | 0     | 0     | 0     | 0     | 0     | 0     | 0     | 0     | 0     | 0     | 0    | 0     | 0     | 0    | 0     | 0     | 0    | 0     | 0     |
| Ureaplasma parvum/urealyticum                       | 234   | 0     | 0    | 0     | 0     | 5256  | 0     | 697   | 0     | 0     | 0     | 0     | 0     | 0    | 0     | 0     | 0    | 0     | 33    | 0    | 0     | 418   |
| Prevotella timonensis                               | 0     | 0     | 0    | 0     | 1255  | 85    | 0     | 10393 | 0     | 9753  | 0     | 0     | 559   | 0    | 0     | 95    | 0    | 0     | 0     | 0    | 251   | 0     |
| Fenollaria massiliensis/timonensis                  | 0     | 124   | 0    | 0     | 0     | 0     | 0     | 10005 | 0     | 0     | 0     | 0     | 841   | 0    | 0     | 0     | 0    | 0     | 0     | 0    | 0     | 0     |
| Anaerococcus                                        | 90    | 0     | 305  | 101   | 0     | 143   | 0     | 0     | 0     | 190   | 34    | 0     | 0     | 0    | 0     | 0     | 0    | 0     | 0     | 0    | 56    | 0     |
| Corynebacterium coyleae                             | 325   | 91    | 0    | 0     | 0     | 0     | 0     | 38    | 38    | 0     | 56    | 0     | 0     | 0    | 80    | 0     | 0    | 0     | 0     | 0    | 0     | 0     |
| Prevotella bivia                                    | 0     | 0     | 0    | 0     | 2702  | 0     | 0     | 305   | 0     | 0     | 0     | 0     | 13140 | 0    | 0     | 136   | 0    | 0     | 0     | 0    | 0     | 0     |
| Prevotella melaninogenica                           | 0     | 0     | 0    | 0     | 0     | 0     | 0     | 0     | 0     | 0     | 0     | 0     | 0     | 938  | 0     | 0     | 0    | 0     | 0     | 0    | 7520  | 0     |
| Corynebacterium aurimucosum/ minutissimum/singulare | 120   | 247   | 0    | 0     | 0     | 213   | 0     | 0     | 0     | 432   | 73    | 0     | 39    | 53   | 954   | 60    | 111  | 0     | 268   | 0    | 99    | 205   |
| Staphylococcus aureus                               | 0     | 0     | 0    | 0     | 0     | 0     | 0     | 0     | 0     | 0     | 0     | 0     | 0     | 0    | 0     | 0     | 0    | 0     | 0     | 0    | 0     | 0     |
| Anaerococcus lactolyticus                           | 0     | 0     | 0    | 0     | 585   | 0     | 0     | 1496  | 0     | 0     | 0     | 0     | 0     | 0    | 103   | 122   | 0    | 0     | 0     | 0    | 0     | 0     |
| Aerococcus christensenii                            | 3019  | 0     | 0    | 0     | 29    | 0     | 0     | 467   | 0     | 0     | 0     | 0     | 0     | 54   | 0     | 0     | 0    | 0     | 0     | 0    | 0     | 0     |
| Corynebacterium glucuronolyticum                    | 0     | 0     | 300  | 344   | 0     | 79    | 0     | 0     | 0     | 5816  | 849   | 0     | 0     | 0    | 0     | 244   | 0    | 0     | 0     | 0    | 0     | 0     |
| Veillonella atypica                                 | 0     | 0     | 0    | 0     | 0     | 0     | 0     | 0     | 0     | 0     | 0     | 0     | 0     | 0    | 0     | 0     | 0    | 0     | 0     | 0    | 166   | 0     |
| Veillonella                                         | 52    | 0     | 0    | 0     | 0     | 0     | 0     | 0     | 0     | 0     | 0     | 0     | 0     | 0    | 0     | 0     | 0    | 0     | 0     | 0    | 184   | 0     |
| Mycoplasma hominis                                  | 2443  | 0     | 0    | 0     | 0     | 0     | 0     | 0     | 0     | 0     | 0     | 0     | 0     | 0    | 0     | 0     | 0    | 0     | 0     | 0    | 0     | 0     |
| Granulicatella elegans                              | 156   | 0     | 0    | 0     | 0     | 0     | 0     | 903   | 0     | 0     | 0     | 0     | 216   | 0    | 0     | 0     | 0    | 0     | 0     | 0    | 0     | 0     |
| Ezakiella                                           | 0     | 30    | 0    | 0     | 27    | 0     | 0     | 0     | 0     | 0     | 0     | 0     | 0     | 0    | 0     | 0     | 0    | 0     | 0     | 0    | 0     | 0     |
| Shigella/Escherichia                                | 0     | 104   | 0    | 0     | 0     | 0     | 0     | 0     | 0     | 0     | 0     | 0     | 0     | 0    | 29    | 0     | 0    | 0     | 0     | 0    | 0     | 0     |
| Streptococcus salivarius                            | 0     | 0     | 0    | 0     | 0     | 0     | 0     | 0     | 0     | 0     | 0     | 0     | 0     | 0    | 0     | 0     | 0    | 0     | 0     | 0    | 0     | 0     |
| Actinomyces turicensis                              | 0     | 0     | 0    | 0     | 114   | 77    | 0     | 1523  | 0     | 0     | 0     | 0     | 168   | 0    | 0     | 0     | 53   | 0     | 0     | 0    | 550   | 0     |
| Prevotella corporis                                 | 0     | 0     | 0    | 0     | 414   | 0     | 0     | 365   | 0     | 0     | 0     | 26    | 0     | 0    | 0     | 0     | 0    | 0     | 0     | 0    | 0     | 0     |
| Corynebacterium simulans                            | 0     | 0     | 0    | 1575  | 0     | 0     | 0     | 0     | 0     | 0     | 0     | 0     | 0     | 0    | 0     | 0     | 233  | 0     | 0     | 0    | 0     | 0     |
| Fusobacterium equinum                               | 0     | 0     | 0    | 0     | 0     | 0     | 0     | 229   | 0     | 0     | 0     | 0     | 0     | 0    | 0     | 0     | 0    | 0     | 0     | 0    | 455   | 0     |
| Corynebacterium                                     | 137   | 79    | 0    | 0     | 0     | 129   | 0     | 0     | 0     | 0     | 0     | 0     | 0     | 0    | 0     | 0     | 0    | 0     | 75    | 0    | 0     | 0     |
| Staphylococcus haemolyticus                         | 0     | 0     | 0    | 0     | 0     | 439   | 0     | 0     | 34    | 387   | 0     | 0     | 50    | 55   | 98    | 0     | 0    | 0     | 109   | 55   | 36    | 0     |
| Gemella asaccharolytica                             | 0     | 0     | 0    | 0     | 0     | 0     | 0     | 238   | 0     | 0     | 0     | 0     | 0     | 0    | 0     | 0     | 0    | 0     | 0     | 0    | 0     | 0     |
| Peptoniphilus                                       | 0     | 0     | 0    | 148   | 1405  | 0     | 0     | 1626  | 0     | 0     | 423   | 0     | 396   | 0    | 0     | 89    | 122  | 0     | 0     | 0    | 0     | 0     |
| Corynebacterium hadale/imitans                      | 0     | 133   | 0    | 0     | 0     | 0     | 0     | 0     | 0     | 60    | 0     | 0     | 0     | 0    | 104   | 0     | 26   | 0     | 107   | 0    | 0     | 54    |
| Eggerthella sp. type 1 (species)                    | 2263  | 0     | 0    | 0     | 0     | 0     | 0     | 0     | 0     | 0     | 0     | 0     | 0     | 0    | 0     | 0     | 0    | 0     | 0     | 0    | 0     | 0     |
| Prevotella disiens                                  | 0     | 0     | 0    | 0     | 706   | 0     | 0     | 5098  | 0     | 0     | 0     | 0     | 138   | 0    | 0     | 0     | 0    | 0     | 0     | 0    | 0     | 0     |
| Peptoniphilus lacrimalis                            | 0     | 0     | 0    | 0     | 0     | 0     | 0     | 3551  | 0     | 0     | 0     | 0     | 1073  | 0    | 0     | 0     | 0    | 0     | 0     | 0    | 0     | 0     |
| Anaerococcus vaginalis                              | 0     | 0     | 0    | 0     | 747   | 0     | 0     | 549   | 0     | 0     | 0     | 0     | 477   | 0    | 0     | 0     | 0    | 0     | 0     | 0    | 0     | 0     |
| Facklamia hominis                                   | 0     | 0     | 590  | 0     | 0     | 0     | 0     | 0     | 0     | 7528  | 318   | 0     | 0     | 0    | 0     | 0     | 0    | 0     | 0     | 0    | 0     | 0     |
| Prevotella amnii                                    | 0     | 0     | 0    | 0     | 0     | 0     | 0     | 0     | 0     | 0     | 0     | 0     | 0     | 0    | 0     | 0     | 0    | 0     | 0     | 0    | 0     | 0     |
| Campylobacter ureolyticus                           | 0     | 0     | 0    | 0     | 253   | 0     | 0     | 495   | 0     | 3995  | 0     | 0     | 0     | 0    | 0     | 0     | 0    | 0     | 0     | 0    | 0     | 0     |
| BVAB2 (species)                                     | 0     | 0     | 0    | 0     | 0     | 0     | 0     | 0     | 0     | 0     | 0     | 0     | 0     | 0    | 0     | 0     | 0    | 0     | 0     | 0    | 0     | 0     |
| Haemophilus                                         | 0     | 0     | 0    | 0     | 0     | 0     | 0     | 0     | 0     | 0     | 0     | 0     | 0     | 0    | 0     | 0     | 0    | 0     | 0     | 0    | 362   | 0     |
| Anaerococcus hydrogenalis/rubeifantus               | 0     | 0     | 456  | 309   | 0     | 0     | 0     | 0     | 0     | 95    | 0     | 55    | 0     | 0    | 0     | 0     | 0    | 0     | 0     | 0    | 0     | 0     |
| Anaerococcus mediterraneensis                       | 0     | 0     | 155  | 0     | 279   | 0     | 0     | 424   | 0     | 0     | 0     | 0     | 123   | 0    | 0     | 35    | 78   | 0     | 0     | 0    | 0     | 0     |
| Dialister sp. type 2                                | 0     | 0     | 0    | 0     | 491   | 0     | 0     | 8929  | 0     | 0     | 0     | 0     | 0     | 0    | 0     | 0     | 0    | 0     | 0     | 0    | 0     | 0     |
| Dialister microaerophilus                           | 0     | 0     | 0    | 0     | 541   | 0     | 0     | 1075  | 0     | 0     | 0     | 0     | 0     | 0    | 0     | 42    | 0    | 0     | 0     | 0    | 0     | 0     |
| Corynebacterium amycolatum                          | 0     | 406   | 58   | 0     | 0     | 0     | 0     | 0     | 0     | 51    | 0     | 0     | 0     | 0    | 0     | 0     | 0    | 0     | 0     | 0    | 284   | 0     |
| Ureaplasma                                          | 192   | 0     | 0    | 0     | 0     | 0     | 0     | 0     | 0     | 0     | 0     | 0     | 0     | 0    | 0     | 0     | 0    | 0     | 0     | 0    | 0     | 0     |
| Enterococcus faecalis                               | 0     | 0     | 0    | 0     | 0     | 0     | 2041  | 0     | 0     | 1541  | 0     | 0     | 0     | 0    | 0     | 0     | 0    | 0     | 0     | 0    | 0     | 0     |
| Parvimonas                                          | 0     | 0     | 0    | 0     | 67    | 0     | 0     | 2944  | 0     | 0     | 0     | 0     | 0     | 0    | 0     | 0     | 0    | 0     | 0     | 0    | 0     | 0     |
| Haemophilus pittmaniae                              | 0     | 0     | 181  | 0     | 0     | 0     | 0     | 0     | 0     | 0     | 0     | 0     | 0     | 0    | 0     | 0     | 0    | 0     | 0     | 0    | 2638  | 0     |
| Actinomyces neuii                                   | 0     | 0     | 0    | 323   | 0     | 28    | 0     | 0     | 0     | 644   | 920   | 0     | 131   | 0    | 145   | 29    | 0    | 0     | 0     | 0    | 0     | 0     |

Samples S282 - S311

| Species                                                | S282 | S283 | S285 | S286  | S289 | S290 | S291 | S292  | S293 | S295 | S296 | S297 | S298 | S299 | S301 | S302 | S306 | S307 | S308 | S309 | S310 | S311 |
|--------------------------------------------------------|------|------|------|-------|------|------|------|-------|------|------|------|------|------|------|------|------|------|------|------|------|------|------|
| Peptoniphilus rhintidis                                | 0    | 0    | 281  | 0     | 0    | 0    | 0    | 0     | 0    | 0    | 482  | 0    | 0    | 0    | 0    | 154  | 0    | 0    | 0    | 0    | 0    | 0    |
| Anaerococcus senegalensis                              | 0    | 0    | 0    | 10794 | 0    | 46   | 0    | 0     | 0    | 0    | 591  | 0    | 0    | 0    | 233  | 139  | 0    | 0    | 0    | 0    | 0    | 0    |
| Peptostreptococcus anaerobius                          | 0    | 0    | 0    | 0     | 1351 | 0    | 0    | 0     | 0    | 0    | 0    | 0    | 807  | 0    | 0    | 0    | 158  | 0    | 0    | 0    | 0    | 0    |
| Dialister propionificiens                              | 0    | 0    | 0    | 0     | 1180 | 0    | 0    | 700   | 0    | 313  | 0    | 0    | 2908 | 0    | 0    | 0    | 0    | 0    | 0    | 0    | 0    | 0    |
| Peptoniphilus harei                                    | 0    | 0    | 61   | 1938  | 0    | 77   | 0    | 0     | 0    | 0    | 2812 | 0    | 0    | 0    | 0    | 214  | 0    | 0    | 0    | 0    | 0    | 0    |
| Negativicoccus succinicivorans                         | 0    | 0    | 118  | 0     | 0    | 0    | 0    | 0     | 0    | 2621 | 935  | 0    | 0    | 0    | 0    | 0    | 0    | 0    | 0    | 0    | 0    | 0    |
| Parvimonas micra                                       | 0    | 0    | 0    | 0     | 48   | 0    | 0    | 0     | 0    | 27   | 0    | 0    | 0    | 0    | 0    | 0    | 0    | 0    | 0    | 0    | 0    | 0    |
| Actinomyces ihumii                                     | 0    | 0    | 307  | 0     | 0    | 0    | 0    | 0     | 0    | 3179 | 50   | 0    | 0    | 0    | 0    | 0    | 0    | 0    | 0    | 0    | 0    | 0    |
| Actinotignum timonense                                 | 0    | 0    | 0    | 0     | 0    | 0    | 0    | 0     | 0    | 0    | 0    | 0    | 0    | 0    | 0    | 0    | 0    | 0    | 0    | 0    | 35   | 0    |
| Fenollaria                                             | 0    | 0    | 0    | 0     | 53   | 0    | 0    | 1245  | 0    | 0    | 0    | 0    | 808  | 0    | 0    | 0    | 0    | 0    | 0    | 0    | 0    | 0    |
| Fusobacterium massiliense                              | 0    | 0    | 0    | 0     | 0    | 0    | 0    | 0     | 0    | 0    | 0    | 0    | 0    | 0    | 0    | 0    | 0    | 0    | 0    | 0    | 0    | 0    |
| Actinobaculum massiliense                              | 0    | 0    | 0    | 0     | 633  | 0    | 0    | 0     | 0    | 0    | 0    | 0    | 0    | 0    | 0    | 0    | 0    | 0    | 0    | 0    | 0    | 0    |
| Peptoniphilus coxii                                    | 0    | 0    | 240  | 210   | 768  | 50   | 0    | 962   | 0    | 0    | 179  | 0    | 175  | 0    | 0    | 0    | 0    | 0    | 0    | 0    | 110  | 0    |
| Staphylococcus lugdunensis                             | 0    | 0    | 0    | 0     | 0    | 0    | 0    | 0     | 0    | 0    | 0    | 0    | 0    | 0    | 0    | 0    | 0    | 0    | 0    | 0    | 0    | 0    |
| Dermabacter                                            | 0    | 0    | 0    | 0     | 0    | 35   | 0    | 0     | 0    | 66   | 0    | 0    | 0    | 0    | 146  | 0    | 0    | 0    | 0    | 0    | 0    | 28   |
| Alloscardovia omnicolens                               | 0    | 0    | 0    | 0     | 0    | 0    | 0    | 0     | 0    | 55   | 0    | 0    | 0    | 0    | 0    | 0    | 0    | 0    | 0    | 0    | 0    | 0    |
| Varibaculum cambriense                                 | 0    | 0    | 0    | 0     | 1916 | 0    | 0    | 187   | 0    | 2345 | 0    | 0    | 0    | 0    | 0    | 0    | 0    | 0    | 0    | 0    | 0    | 0    |
| Streptococcus urinialis                                | 0    | 0    | 0    | 0     | 0    | 0    | 0    | 0     | 0    | 0    | 0    | 667  | 0    | 0    | 0    | 0    | 0    | 0    | 0    | 0    | 0    | 0    |
| Corynebacterium appendicis                             | 0    | 0    | 0    | 0     | 0    | 0    | 0    | 0     | 0    | 0    | 0    | 0    | 0    | 0    | 0    | 0    | 0    | 0    | 0    | 0    | 0    | 0    |
| Actinotignum schaalii                                  | 0    | 0    | 0    | 0     | 47   | 0    | 0    | 0     | 0    | 0    | 0    | 0    | 0    | 0    | 0    | 0    | 0    | 0    | 0    | 0    | 0    | 0    |
| Corynebacterium timonense                              | 0    | 0    | 105  | 0     | 92   | 0    | 0    | 0     | 0    | 4179 | 0    | 0    | 0    | 0    | 0    | 0    | 454  | 0    | 0    | 0    | 0    | 0    |
| Gemella                                                | 0    | 0    | 0    | 0     | 0    | 0    | 0    | 0     | 0    | 0    | 0    | 0    | 0    | 0    | 0    | 0    | 0    | 0    | 0    | 0    | 0    | 0    |
| Klebsiella aerogenes/Enterobacter asburiae             | 0    | 0    | 0    | 0     | 0    | 0    | 0    | 0     | 0    | 0    | 0    | 0    | 0    | 0    | 0    | 0    | 0    | 0    | 0    | 0    | 0    | 0    |
| Fusobacterium periodonticum                            | 0    | 0    | 0    | 0     | 0    | 0    | 0    | 0     | 0    | 46   | 0    | 0    | 0    | 0    | 0    | 0    | 0    | 0    | 0    | 0    | 2662 | 0    |
| Veillonella dispar                                     | 0    | 0    | 0    | 0     | 0    | 0    | 0    | 0     | 0    | 0    | 0    | 0    | 0    | 0    | 0    | 0    | 0    | 0    | 0    | 0    | 360  | 0    |
| Prevotella colorans                                    | 0    | 0    | 0    | 0     | 143  | 0    | 0    | 1674  | 0    | 0    | 0    | 0    | 267  | 0    | 0    | 0    | 0    | 0    | 0    | 0    | 0    | 0    |
| Candidatus Peptoniphilus massiliensis                  | 0    | 29   | 0    | 0     | 0    | 0    | 0    | 0     | 0    | 42   | 121  | 0    | 0    | 0    | 0    | 0    | 0    | 0    | 0    | 0    | 0    | 0    |
| Eremococcus                                            | 0    | 0    | 0    | 0     | 0    | 0    | 0    | 0     | 0    | 44   | 0    | 0    | 0    | 0    | 249  | 0    | 0    | 0    | 0    | 0    | 0    | 0    |
| Varibaculum anthropi                                   | 0    | 0    | 0    | 0     | 0    | 0    | 0    | 749   | 0    | 0    | 0    | 0    | 0    | 0    | 0    | 0    | 0    | 0    | 0    | 0    | 0    | 0    |
| Propionimicrobium lymphophilum                         | 0    | 0    | 0    | 0     | 0    | 0    | 0    | 120   | 0    | 582  | 0    | 0    | 0    | 0    | 0    | 0    | 0    | 0    | 0    | 0    | 0    | 0    |
| Streptococcus dysgalactiae                             | 0    | 0    | 0    | 0     | 0    | 0    | 0    | 0     | 0    | 0    | 0    | 0    | 0    | 0    | 0    | 0    | 0    | 0    | 0    | 0    | 0    | 0    |
| Negativicoccus                                         | 0    | 0    | 192  | 0     | 0    | 0    | 0    | 423   | 0    | 971  | 47   | 0    | 0    | 0    | 0    | 162  | 0    | 0    | 0    | 0    | 0    | 0    |
| Porphyromonas somerae                                  | 0    | 0    | 0    | 0     | 0    | 0    | 0    | 0     | 0    | 0    | 0    | 0    | 0    | 0    | 0    | 0    | 316  | 0    | 0    | 0    | 0    | 0    |
| Corynebacterium jeikeium                               | 46   | 113  | 0    | 0     | 0    | 0    | 0    | 0     | 0    | 0    | 0    | 0    | 0    | 0    | 0    | 0    | 0    | 0    | 0    | 0    | 0    | 282  |
| Mobiluncus curtisii                                    | 0    | 0    | 0    | 0     | 363  | 0    | 0    | 272   | 0    | 0    | 0    | 0    | 28   | 0    | 0    | 0    | 0    | 0    | 0    | 0    | 0    | 0    |
| Porphyromonas uenonis                                  | 0    | 0    | 0    | 0     | 80   | 0    | 0    | 3292  | 0    | 0    | 0    | 0    | 0    | 0    | 0    | 0    | 0    | 0    | 0    | 0    | 0    | 0    |
| Aerococcus urinae                                      | 0    | 0    | 0    | 0     | 0    | 0    | 0    | 0     | 0    | 1947 | 126  | 0    | 0    | 0    | 0    | 0    | 0    | 0    | 0    | 0    | 0    | 0    |
| Corynebacterium mycetoides                             | 0    | 0    | 67   | 0     | 78   | 0    | 0    | 0     | 0    | 0    | 0    | 0    | 0    | 0    | 0    | 0    | 0    | 0    | 0    | 0    | 0    | 0    |
| Cutibacterium acnes                                    | 0    | 0    | 0    | 0     | 0    | 0    | 0    | 0     | 0    | 0    | 0    | 0    | 0    | 0    | 0    | 0    | 0    | 0    | 0    | 0    | 0    | 0    |
| Urinacoccus massiliensis                               | 0    | 0    | 36   | 0     | 189  | 0    | 0    | 40    | 0    | 0    | 34   | 0    | 0    | 0    | 0    | 0    | 0    | 0    | 0    | 0    | 0    | 0    |
| Campylobacter hominis                                  | 0    | 0    | 0    | 0     | 0    | 0    | 0    | 67    | 0    | 0    | 0    | 0    | 589  | 0    | 0    | 0    | 0    | 0    | 0    | 0    | 0    | 0    |
| Staphylococcus capitis/caprae                          | 0    | 0    | 0    | 0     | 0    | 417  | 0    | 0     | 0    | 0    | 0    | 0    | 0    | 0    | 0    | 0    | 0    | 0    | 0    | 0    | 0    | 0    |
| Sneathia                                               | 0    | 0    | 0    | 0     | 0    | 0    | 0    | 12209 | 0    | 0    | 0    | 0    | 0    | 0    | 0    | 0    | 0    | 0    | 0    | 0    | 0    | 0    |
| Prevotella jejuni                                      | 0    | 0    | 0    | 0     | 0    | 0    | 0    | 0     | 0    | 0    | 0    | 0    | 0    | 0    | 0    | 0    | 0    | 0    | 0    | 0    | 0    | 0    |
| Varibaculum                                            | 0    | 0    | 0    | 0     | 0    | 0    | 0    | 0     | 0    | 0    | 0    | 0    | 0    | 0    | 0    | 0    | 0    | 0    | 0    | 0    | 0    | 0    |
| Corynebacterium striatum                               | 0    | 0    | 0    | 0     | 0    | 0    | 0    | 0     | 0    | 0    | 0    | 0    | 0    | 0    | 0    | 0    | 0    | 0    | 0    | 0    | 0    | 0    |
| Jonquetella anthropi                                   | 0    | 0    | 0    | 0     | 0    | 0    | 0    | 0     | 0    | 0    | 0    | 0    | 0    | 0    | 0    | 0    | 0    | 0    | 0    | 0    | 0    | 0    |
| Peptoniphilus koenoenieniae                            | 0    | 0    | 0    | 0     | 0    | 0    | 0    | 533   | 0    | 0    | 0    | 0    | 0    | 0    | 0    | 0    | 0    | 0    | 0    | 0    | 0    | 0    |
| Bifidobacterium longum                                 | 0    | 27   | 0    | 0     | 0    | 0    | 0    | 0     | 0    | 0    | 0    | 0    | 0    | 0    | 0    | 0    | 0    | 0    | 0    | 0    | 0    | 0    |
| Helicobacter                                           | 0    | 0    | 0    | 175   | 0    | 0    | 0    | 0     | 0    | 0    | 0    | 0    | 0    | 0    | 0    | 0    | 0    | 0    | 0    | 0    | 0    | 0    |
| Lawsonella clevelandensis                              | 0    | 0    | 0    | 0     | 197  | 0    | 0    | 0     | 0    | 556  | 34   | 0    | 1178 | 0    | 0    | 0    | 0    | 0    | 0    | 0    | 0    | 0    |
| Escherichia coli/fergusonii                            | 0    | 0    | 0    | 0     | 0    | 0    | 0    | 0     | 0    | 0    | 0    | 0    | 0    | 0    | 0    | 0    | 0    | 0    | 0    | 0    | 0    | 0    |
| Fusobacterium nucleatum                                | 0    | 0    | 0    | 0     | 0    | 0    | 0    | 0     | 0    | 451  | 0    | 0    | 0    | 0    | 0    | 0    | 0    | 0    | 0    | 0    | 3966 | 0    |
| Porphyromonas asaccharolytica                          | 0    | 0    | 0    | 0     | 0    | 0    | 0    | 748   | 0    | 0    | 0    | 0    | 0    | 0    | 0    | 0    | 0    | 0    | 0    | 0    | 0    | 0    |
| Anaerococcus octavius                                  | 0    | 0    | 0    | 0     | 0    | 0    | 0    | 0     | 0    | 0    | 326  | 0    | 0    | 0    | 25   | 0    | 0    | 0    | 0    | 0    | 0    | 0    |
| Fusobacterium                                          | 0    | 0    | 0    | 0     | 0    | 0    | 0    | 0     | 0    | 0    | 0    | 0    | 0    | 0    | 0    | 0    | 0    | 0    | 0    | 0    | 126  | 0    |
| Corynebacterium phoceense                              | 0    | 0    | 0    | 0     | 0    | 0    | 0    | 0     | 0    | 0    | 0    | 0    | 0    | 0    | 0    | 0    | 0    | 0    | 0    | 0    | 0    | 0    |
| Ruminococcus                                           | 0    | 0    | 0    | 0     | 0    | 0    | 0    | 0     | 0    | 0    | 0    | 0    | 0    | 0    | 0    | 0    | 0    | 0    | 0    | 0    | 0    | 0    |
| Arcanobacterium                                        | 0    | 77   | 0    | 0     | 0    | 0    | 0    | 829   | 0    | 0    | 0    | 0    | 0    | 0    | 0    | 0    | 0    | 0    | 0    | 0    | 0    | 0    |
| Khoudiadiopia                                          | 0    | 0    | 0    | 0     | 0    | 0    | 0    | 154   | 0    | 45   | 0    | 0    | 0    | 0    | 0    | 0    | 0    | 0    | 0    | 0    | 0    | 0    |
| Atopobium deltae                                       | 0    | 0    | 0    | 0     | 687  | 0    | 0    | 258   | 0    | 0    | 0    | 0    | 226  | 0    | 0    | 0    | 0    | 0    | 0    | 0    | 0    | 0    |
| Haemophilus parahaemolyticus                           | 0    | 0    | 0    | 0     | 0    | 0    | 0    | 0     | 0    | 0    | 0    | 0    | 0    | 0    | 0    | 0    | 0    | 0    | 0    | 0    | 0    | 0    |
| Howardella                                             | 0    | 0    | 0    | 0     | 91   | 0    | 0    | 366   | 0    | 0    | 0    | 0    | 0    | 0    | 0    | 0    | 0    | 0    | 0    | 0    | 0    | 0    |
| Prevotella buccalis                                    | 0    | 0    | 43   | 0     | 49   | 0    | 0    | 1007  | 0    | 211  | 0    | 0    | 0    | 0    | 0    | 0    | 0    | 0    | 0    | 0    | 0    | 0    |
| Corynebacterium auris                                  | 0    | 0    | 0    | 0     | 32   | 0    | 0    | 0     | 0    | 0    | 225  | 0    | 0    | 0    | 0    | 0    | 0    | 0    | 0    | 0    | 0    | 0    |
| Candidatus Mycoplasma girerdii                         | 0    | 0    | 0    | 0     | 0    | 0    | 0    | 0     | 0    | 0    | 0    | 0    | 0    | 0    | 0    | 0    | 0    | 0    | 0    | 0    | 0    | 0    |
| Alloicoccus                                            | 0    | 0    | 0    | 0     | 0    | 0    | 0    | 0     | 0    | 0    | 0    | 0    | 0    | 0    | 0    | 0    | 0    | 0    | 0    | 0    | 0    | 0    |
| Corynebacterium founierii/mucifaciens/ureicelerivorans | 0    | 0    | 0    | 0     | 0    | 0    | 0    | 0     | 0    | 0    | 52   | 0    | 0    | 0    | 0    | 0    | 0    | 0    | 0    | 0    | 0    | 0    |
| Corynebacterium auris/timonense                        | 0    | 0    | 0    | 0     | 0    | 0    | 0    | 0     | 0    | 3592 | 77   | 0    | 0    | 0    | 0    | 0    | 0    | 0    | 0    | 0    | 0    | 0    |
| Veillonella ratti/seminalis                            | 0    | 0    | 32   | 0     | 0    | 0    | 0    | 0     | 0    | 0    | 0    | 0    | 0    | 0    | 0    | 0    | 0    | 0    | 0    | 0    | 0    | 0    |

# Samples S282 - S311

| Species                                    | S282 | S283 | S285 | S286 | S289 | S290 | S291 | S292 | S293 | S295 | S296 | S297 | S298 | S299 | S301 | S302 | S306 | S307 | S308 | S309 | S310 | S311 |
|--------------------------------------------|------|------|------|------|------|------|------|------|------|------|------|------|------|------|------|------|------|------|------|------|------|------|
| Lactobacillus gasseri                      | 0    | 0    | 0    | 0    | 0    | 0    | 0    | 0    | 0    | 0    | 0    | 0    | 0    | 0    | 0    | 0    | 0    | 0    | 0    | 0    | 0    | 0    |
| Tissierella                                | 0    | 0    | 0    | 0    | 0    | 0    | 0    | 774  | 0    | 0    | 0    | 0    | 0    | 0    | 0    | 0    | 0    | 0    | 0    | 0    | 0    | 0    |
| Granulicatella adiacens                    | 0    | 0    | 0    | 0    | 0    | 0    | 0    | 0    | 0    | 0    | 0    | 0    | 0    | 0    | 0    | 0    | 0    | 0    | 0    | 0    | 0    | 0    |
| Sutterella                                 | 0    | 0    | 0    | 0    | 140  | 0    | 0    | 113  | 0    | 0    | 0    | 0    | 0    | 0    | 0    | 0    | 0    | 0    | 0    | 0    | 0    | 0    |
| Prevotella nanceiensis                     | 0    | 0    | 0    | 0    | 0    | 0    | 0    | 0    | 0    | 0    | 0    | 0    | 0    | 0    | 0    | 0    | 0    | 0    | 0    | 0    | 170  | 0    |
| Lactobacillus jensenii                     | 0    | 0    | 0    | 0    | 0    | 0    | 0    | 0    | 0    | 0    | 0    | 0    | 0    | 0    | 0    | 0    | 0    | 0    | 0    | 0    | 0    | 0    |
| Lactobacillus crispatus                    | 0    | 0    | 0    | 0    | 0    | 0    | 0    | 0    | 0    | 0    | 0    | 0    | 0    | 0    | 0    | 0    | 0    | 0    | 0    | 0    | 0    | 0    |
| Candidate Division TM7 vaginal (genus)     | 0    | 0    | 0    | 0    | 0    | 0    | 0    | 61   | 0    | 0    | 0    | 0    | 0    | 0    | 0    | 0    | 0    | 0    | 0    | 0    | 0    | 0    |
| Candidatus Saccharimonas                   | 211  | 0    | 0    | 0    | 0    | 0    | 0    | 0    | 0    | 0    | 0    | 0    | 0    | 0    | 0    | 0    | 0    | 0    | 0    | 0    | 0    | 0    |
| Peptococcus niger                          | 0    | 0    | 0    | 0    | 0    | 0    | 0    | 188  | 0    | 0    | 0    | 0    | 0    | 0    | 0    | 0    | 0    | 0    | 0    | 0    | 0    | 0    |
| Neisseria flavescens/perflava              | 0    | 0    | 0    | 0    | 0    | 0    | 0    | 0    | 0    | 0    | 0    | 0    | 0    | 0    | 0    | 0    | 0    | 0    | 0    | 0    | 0    | 0    |
| Gemella sanguinis                          | 0    | 0    | 0    | 0    | 0    | 0    | 0    | 0    | 0    | 0    | 0    | 0    | 0    | 0    | 0    | 0    | 0    | 0    | 0    | 0    | 0    | 0    |
| Porphyromonas                              | 0    | 0    | 0    | 0    | 0    | 0    | 0    | 0    | 0    | 0    | 0    | 0    | 0    | 0    | 0    | 0    | 0    | 0    | 0    | 0    | 3835 | 0    |
| Prevotella                                 | 0    | 0    | 0    | 0    | 0    | 0    | 0    | 0    | 0    | 0    | 0    | 0    | 0    | 854  | 0    | 0    | 0    | 0    | 0    | 0    | 0    | 227  |
| Corynebacterium thomssenii                 | 0    | 0    | 0    | 0    | 0    | 0    | 0    | 0    | 0    | 0    | 0    | 0    | 0    | 0    | 0    | 0    | 0    | 0    | 0    | 0    | 0    | 0    |
| Lachnospiraceae                            | 0    | 0    | 0    | 0    | 0    | 0    | 0    | 520  | 0    | 0    | 0    | 0    | 0    | 0    | 0    | 0    | 0    | 0    | 0    | 0    | 90   | 0    |
| Corynebacterium tuberculostearicum         | 0    | 0    | 0    | 0    | 0    | 0    | 0    | 0    | 0    | 0    | 0    | 0    | 0    | 0    | 0    | 0    | 0    | 0    | 0    | 0    | 84   | 0    |
| Dermabacter hominis                        | 0    | 0    | 0    | 0    | 0    | 0    | 0    | 0    | 0    | 0    | 0    | 0    | 0    | 0    | 0    | 0    | 0    | 0    | 0    | 0    | 0    | 0    |
| Veillonella rogosae                        | 0    | 0    | 0    | 0    | 0    | 0    | 0    | 0    | 0    | 0    | 0    | 0    | 0    | 0    | 0    | 0    | 0    | 0    | 0    | 0    | 176  | 0    |
| Actinomyces hongkongensis                  | 0    | 0    | 0    | 0    | 0    | 0    | 0    | 0    | 0    | 0    | 0    | 0    | 0    | 0    | 0    | 0    | 0    | 0    | 0    | 0    | 0    | 0    |
| Veillonella parvula/rogosae                | 0    | 0    | 0    | 0    | 0    | 0    | 0    | 0    | 0    | 0    | 0    | 0    | 0    | 0    | 0    | 0    | 0    | 0    | 0    | 0    | 0    | 0    |
| Anaerococcus provencensis                  | 0    | 32   | 0    | 0    | 0    | 0    | 0    | 0    | 0    | 0    | 0    | 0    | 0    | 0    | 0    | 0    | 0    | 0    | 0    | 0    | 0    | 0    |
| Porphyromonas sp. type 1                   | 0    | 0    | 0    | 0    | 81   | 0    | 0    | 54   | 0    | 0    | 0    | 0    | 0    | 0    | 0    | 0    | 0    | 0    | 0    | 0    | 0    | 0    |
| Brevibacterium paucivorans                 | 0    | 0    | 0    | 0    | 0    | 0    | 0    | 0    | 68   | 0    | 0    | 0    | 0    | 0    | 0    | 0    | 0    | 0    | 0    | 0    | 0    | 0    |
| Peptostreptococcus                         | 0    | 0    | 0    | 0    | 0    | 0    | 0    | 304  | 0    | 0    | 0    | 0    | 186  | 0    | 0    | 0    | 0    | 0    | 0    | 0    | 0    | 0    |
| Facklamia languida                         | 0    | 0    | 0    | 0    | 0    | 0    | 0    | 0    | 0    | 0    | 0    | 0    | 0    | 0    | 0    | 0    | 0    | 0    | 0    | 0    | 0    | 0    |
| Streptobacillus                            | 0    | 0    | 0    | 0    | 0    | 0    | 0    | 0    | 0    | 0    | 0    | 0    | 0    | 0    | 0    | 0    | 0    | 0    | 0    | 0    | 0    | 0    |
| Gemella haemolysans                        | 0    | 0    | 0    | 0    | 0    | 0    | 0    | 0    | 0    | 0    | 0    | 0    | 0    | 0    | 0    | 0    | 0    | 0    | 0    | 0    | 0    | 0    |
| Haemophilus sputorum                       | 0    | 0    | 0    | 0    | 0    | 0    | 0    | 0    | 0    | 0    | 0    | 0    | 0    | 0    | 0    | 0    | 0    | 0    | 0    | 0    | 0    | 0    |
| Actinotignum urinale                       | 0    | 0    | 0    | 0    | 0    | 0    | 0    | 1216 | 0    | 0    | 0    | 0    | 0    | 0    | 0    | 0    | 0    | 0    | 0    | 0    | 0    | 0    |
| Dialister pneumosintes                     | 0    | 0    | 0    | 0    | 0    | 0    | 0    | 0    | 0    | 0    | 0    | 0    | 2884 | 0    | 0    | 0    | 0    | 0    | 0    | 0    | 0    | 0    |
| Treponema pallidum                         | 0    | 0    | 0    | 0    | 0    | 0    | 0    | 0    | 0    | 0    | 0    | 0    | 0    | 0    | 0    | 0    | 0    | 0    | 0    | 0    | 0    | 0    |
| Porphyromonas bennoni                      | 0    | 27   | 0    | 0    | 0    | 0    | 0    | 293  | 0    | 0    | 0    | 0    | 0    | 0    | 0    | 0    | 0    | 0    | 0    | 0    | 0    | 0    |
| Bergeyella                                 | 0    | 0    | 0    | 0    | 0    | 0    | 0    | 0    | 0    | 0    | 0    | 0    | 0    | 0    | 0    | 0    | 0    | 0    | 0    | 0    | 473  | 0    |
| Actinotignum schaalii/timonense            | 0    | 0    | 0    | 0    | 0    | 0    | 0    | 0    | 0    | 0    | 0    | 0    | 0    | 0    | 0    | 0    | 0    | 0    | 0    | 0    | 0    | 0    |
| Klebsiella aerogenes/Kluyvera cryocrescens | 0    | 0    | 0    | 0    | 0    | 0    | 0    | 0    | 0    | 0    | 0    | 0    | 0    | 0    | 0    | 0    | 0    | 0    | 0    | 0    | 0    | 0    |
| Rothia mucilaginosa                        | 0    | 0    | 0    | 0    | 0    | 0    | 0    | 0    | 0    | 0    | 0    | 0    | 0    | 0    | 0    | 0    | 0    | 0    | 0    | 0    | 0    | 0    |
| Solobacterium moorei                       | 0    | 0    | 0    | 0    | 0    | 0    | 0    | 0    | 29   | 0    | 0    | 0    | 3517 | 0    | 0    | 0    | 0    | 0    | 0    | 0    | 0    | 0    |
| Mageeibacillus indolicus                   | 0    | 0    | 0    | 0    | 0    | 0    | 0    | 0    | 0    | 0    | 0    | 0    | 0    | 0    | 0    | 0    | 0    | 0    | 0    | 0    | 0    | 0    |
| Serratia urelytica                         | 0    | 0    | 0    | 0    | 0    | 0    | 0    | 0    | 0    | 0    | 0    | 0    | 0    | 0    | 0    | 0    | 0    | 0    | 0    | 0    | 0    | 0    |
| Peptoniphilus obesi                        | 0    | 0    | 0    | 0    | 0    | 0    | 0    | 56   | 0    | 58   | 173  | 0    | 0    | 0    | 0    | 0    | 0    | 0    | 0    | 0    | 0    | 0    |
| Peptoniphilus harei/phoceensis             | 0    | 0    | 0    | 0    | 0    | 0    | 0    | 0    | 0    | 0    | 97   | 0    | 0    | 0    | 0    | 0    | 0    | 0    | 0    | 0    | 0    | 0    |
| Corynebacterium atypicum                   | 88   | 0    | 0    | 0    | 0    | 0    | 0    | 397  | 0    | 0    | 0    | 0    | 0    | 0    | 0    | 0    | 0    | 0    | 0    | 0    | 0    | 0    |
| Atopobium minutum                          | 0    | 0    | 0    | 0    | 0    | 0    | 0    | 0    | 0    | 0    | 0    | 0    | 0    | 0    | 0    | 0    | 0    | 0    | 0    | 0    | 0    | 0    |
| Corynebacterium genitalium                 | 0    | 0    | 0    | 0    | 0    | 0    | 0    | 0    | 0    | 0    | 100  | 0    | 0    | 0    | 0    | 0    | 0    | 0    | 0    | 0    | 0    | 0    |
| Bifidobacterium tsurumiense                | 0    | 0    | 0    | 0    | 0    | 0    | 0    | 0    | 0    | 0    | 0    | 0    | 0    | 0    | 0    | 0    | 0    | 0    | 0    | 0    | 0    | 0    |
| Micrococcus                                | 0    | 0    | 0    | 0    | 0    | 0    | 0    | 0    | 0    | 0    | 0    | 0    | 0    | 0    | 0    | 0    | 0    | 0    | 0    | 0    | 0    | 0    |
| Megasphaera genomsp. type_1                | 0    | 0    | 0    | 0    | 0    | 0    | 0    | 0    | 0    | 0    | 0    | 0    | 0    | 0    | 0    | 0    | 0    | 0    | 0    | 0    | 0    | 0    |
| Enhydrobacter                              | 0    | 0    | 0    | 0    | 0    | 0    | 0    | 0    | 0    | 0    | 0    | 0    | 0    | 0    | 0    | 0    | 0    | 0    | 0    | 0    | 0    | 0    |
| Fastidiosipila sanguinis                   | 0    | 0    | 0    | 0    | 0    | 0    | 0    | 0    | 0    | 52   | 0    | 0    | 0    | 0    | 0    | 0    | 0    | 0    | 0    | 0    | 0    | 0    |
| Prevotellamassilia                         | 0    | 0    | 0    | 0    | 0    | 0    | 0    | 0    | 0    | 0    | 0    | 0    | 0    | 208  | 0    | 0    | 0    | 0    | 0    | 0    | 0    | 0    |
| Peptostreptococcaceae                      | 0    | 0    | 0    | 0    | 0    | 0    | 0    | 129  | 0    | 0    | 0    | 0    | 0    | 0    | 0    | 0    | 0    | 0    | 0    | 0    | 0    | 0    |
| Morganella morganii                        | 0    | 0    | 0    | 0    | 0    | 0    | 0    | 0    | 0    | 0    | 0    | 0    | 0    | 0    | 0    | 0    | 0    | 0    | 0    | 0    | 0    | 0    |
| Neofamilia                                 | 0    | 0    | 0    | 0    | 0    | 0    | 0    | 0    | 0    | 0    | 0    | 0    | 0    | 0    | 0    | 0    | 0    | 0    | 0    | 0    | 0    | 0    |
| Pseudoclavibacter bifida                   | 0    | 0    | 0    | 0    | 0    | 0    | 0    | 0    | 0    | 0    | 0    | 0    | 0    | 0    | 0    | 0    | 0    | 0    | 0    | 0    | 0    | 0    |
| Helcococcus                                | 0    | 0    | 0    | 0    | 0    | 0    | 0    | 0    | 0    | 0    | 0    | 0    | 0    | 0    | 0    | 0    | 0    | 0    | 0    | 0    | 0    | 0    |
| Brevibacterium ravenspurgense              | 0    | 28   | 0    | 0    | 0    | 0    | 0    | 0    | 0    | 0    | 0    | 0    | 0    | 0    | 0    | 0    | 0    | 0    | 0    | 0    | 0    | 0    |
| Moryella indoligenes                       | 0    | 0    | 0    | 0    | 0    | 0    | 0    | 0    | 0    | 0    | 0    | 0    | 0    | 0    | 0    | 0    | 0    | 0    | 0    | 0    | 0    | 0    |
| Olegusella massiliensis                    | 0    | 0    | 0    | 0    | 0    | 0    | 0    | 0    | 0    | 0    | 0    | 0    | 0    | 0    | 0    | 0    | 0    | 0    | 0    | 0    | 0    | 0    |
| Morococcus cerebrosus                      | 0    | 0    | 0    | 0    | 0    | 0    | 0    | 0    | 0    | 0    | 0    | 0    | 0    | 0    | 0    | 0    | 0    | 0    | 0    | 0    | 0    | 0    |
| Prevotella scopos                          | 0    | 0    | 0    | 0    | 0    | 0    | 0    | 0    | 0    | 0    | 0    | 0    | 0    | 0    | 0    | 0    | 0    | 0    | 0    | 0    | 0    | 0    |
| Veillonella parvula/tobetsuensis           | 0    | 0    | 0    | 0    | 0    | 0    | 0    | 0    | 0    | 0    | 0    | 0    | 0    | 0    | 0    | 0    | 0    | 0    | 0    | 0    | 411  | 0    |
| Moryella                                   | 0    | 0    | 0    | 0    | 0    | 0    | 0    | 0    | 0    | 0    | 0    | 0    | 0    | 0    | 0    | 0    | 0    | 0    | 0    | 0    | 0    | 0    |
| Atopobium parvulum                         | 0    | 0    | 0    | 0    | 0    | 0    | 0    | 0    | 0    | 0    | 0    | 0    | 101  | 0    | 0    | 0    | 0    | 0    | 0    | 0    | 68   | 0    |
| Serratia marcescens                        | 0    | 0    | 0    | 0    | 0    | 0    | 0    | 0    | 0    | 0    | 0    | 0    | 0    | 0    | 0    | 0    | 0    | 0    | 0    | 0    | 0    | 0    |
| Collinsella aerofaciens                    | 0    | 0    | 0    | 0    | 0    | 0    | 0    | 0    | 0    | 0    | 0    | 0    | 0    | 0    | 0    | 0    | 0    | 0    | 0    | 0    | 0    | 0    |
| Curvibacter                                | 0    | 0    | 0    | 0    | 0    | 0    | 0    | 0    | 0    | 0    | 0    | 0    | 0    | 0    | 0    | 0    | 0    | 0    | 0    | 0    | 0    | 0    |
| Rothia dentocariosa                        | 0    | 0    | 0    | 0    | 0    | 0    | 0    | 0    | 0    | 0    | 0    | 0    | 0    | 0    | 0    | 0    | 0    | 0    | 0    | 0    | 0    | 0    |
| Prevotella bergensis                       | 0    | 0    | 0    | 0    | 30   | 0    | 0    | 0    | 0    | 0    | 0    | 0    | 0    | 0    | 0    | 0    | 0    | 0    | 0    | 0    | 0    | 0    |
| Corynebacterium sundsvallense              | 0    | 30   | 0    | 0    | 0    | 0    | 0    | 0    | 0    | 0    | 0    | 0    | 0    | 0    | 0    | 0    | 48   | 0    | 0    | 0    | 0    | 0    |

Samples S282 - S311

| Species                                       | S282 | S283 | S285 | S286 | S289 | S290 | S291 | S292 | S293 | S295 | S296 | S297 | S298 | S299 | S301 | S302 | S306 | S307 | S308 | S309 | S310 | S311 |
|-----------------------------------------------|------|------|------|------|------|------|------|------|------|------|------|------|------|------|------|------|------|------|------|------|------|------|
| Coriobacteria                                 | 0    | 0    | 0    | 0    | 0    | 0    | 0    | 0    | 0    | 46   | 78   | 0    | 0    | 0    | 0    | 0    | 0    | 0    | 0    | 0    | 0    | 0    |
| Neisseria meningitidis                        | 0    | 0    | 0    | 0    | 0    | 0    | 0    | 0    | 0    | 0    | 0    | 0    | 0    | 0    | 0    | 0    | 0    | 0    | 0    | 0    | 0    | 0    |
| Dermacoccus nishinomiyaensis                  | 0    | 0    | 0    | 0    | 0    | 0    | 0    | 0    | 0    | 0    | 0    | 0    | 0    | 0    | 0    | 0    | 0    | 0    | 0    | 0    | 0    | 0    |
| Leptotrichia                                  | 0    | 0    | 0    | 0    | 0    | 0    | 0    | 0    | 0    | 0    | 0    | 0    | 0    | 0    | 0    | 0    | 0    | 0    | 0    | 0    | 94   | 0    |
| Microbacteriaceae                             | 0    | 0    | 0    | 0    | 0    | 0    | 0    | 0    | 0    | 0    | 0    | 0    | 0    | 0    | 0    | 0    | 0    | 0    | 0    | 0    | 0    | 0    |
| Klebsiella pneumoniae/variiicola              | 0    | 0    | 0    | 0    | 0    | 0    | 0    | 0    | 0    | 0    | 0    | 0    | 0    | 0    | 0    | 0    | 0    | 0    | 0    | 0    | 0    | 0    |
| Hafnia alvei                                  | 0    | 0    | 0    | 0    | 0    | 0    | 0    | 0    | 0    | 0    | 0    | 0    | 0    | 0    | 0    | 0    | 0    | 0    | 0    | 0    | 0    | 0    |
| Caulobacter                                   | 0    | 0    | 0    | 0    | 0    | 0    | 0    | 0    | 0    | 0    | 0    | 0    | 0    | 0    | 0    | 0    | 0    | 0    | 0    | 0    | 0    | 0    |
| Lactobacillus reuteri                         | 0    | 0    | 0    | 0    | 0    | 0    | 0    | 0    | 0    | 0    | 0    | 0    | 0    | 0    | 0    | 0    | 0    | 0    | 0    | 0    | 0    | 0    |
| Gemella morbillorum                           | 0    | 0    | 0    | 0    | 0    | 0    | 0    | 0    | 0    | 0    | 0    | 0    | 0    | 0    | 0    | 0    | 0    | 0    | 0    | 0    | 41   | 0    |
| Rothia                                        | 0    | 0    | 0    | 0    | 0    | 0    | 0    | 0    | 0    | 0    | 0    | 0    | 0    | 0    | 0    | 0    | 0    | 0    | 0    | 0    | 0    | 0    |
| Campylobacter                                 | 0    | 0    | 0    | 0    | 0    | 0    | 0    | 0    | 0    | 0    | 0    | 0    | 0    | 0    | 0    | 0    | 0    | 0    | 0    | 0    | 0    | 0    |
| Prevotella genogroup 3                        | 0    | 0    | 0    | 0    | 0    | 0    | 0    | 0    | 0    | 0    | 0    | 0    | 0    | 0    | 0    | 0    | 0    | 0    | 0    | 0    | 0    | 0    |
| Staphylococcus warneri                        | 0    | 0    | 0    | 0    | 0    | 0    | 0    | 0    | 0    | 0    | 0    | 0    | 0    | 0    | 0    | 0    | 0    | 0    | 0    | 0    | 0    | 0    |
| Blautia wexlerae                              | 0    | 0    | 0    | 0    | 0    | 0    | 0    | 0    | 0    | 0    | 0    | 0    | 0    | 0    | 0    | 0    | 0    | 0    | 0    | 0    | 0    | 0    |
| Lachnoanaerobaculum                           | 0    | 0    | 0    | 0    | 0    | 0    | 0    | 0    | 0    | 0    | 0    | 0    | 0    | 0    | 0    | 0    | 0    | 0    | 0    | 0    | 416  | 0    |
| Anaerococcus hydrogenalis/senegalensis        | 0    | 0    | 0    | 0    | 0    | 0    | 0    | 0    | 0    | 0    | 0    | 0    | 0    | 0    | 0    | 0    | 0    | 0    | 0    | 0    | 0    | 0    |
| Brevibacterium mcbrellneri                    | 0    | 69   | 0    | 0    | 0    | 0    | 0    | 0    | 0    | 0    | 0    | 0    | 0    | 0    | 0    | 0    | 0    | 0    | 0    | 0    | 0    | 0    |
| Corynebacterium glaucum                       | 0    | 0    | 0    | 0    | 0    | 0    | 0    | 0    | 0    | 0    | 0    | 0    | 0    | 0    | 0    | 0    | 0    | 0    | 0    | 0    | 0    | 0    |
| Prevotella salivae                            | 0    | 0    | 0    | 0    | 0    | 0    | 0    | 0    | 0    | 0    | 0    | 0    | 0    | 0    | 0    | 0    | 0    | 0    | 0    | 0    | 0    | 0    |
| Coriobacteriaceae                             | 0    | 0    | 0    | 0    | 151  | 0    | 0    | 0    | 0    | 0    | 0    | 0    | 30   | 0    | 0    | 0    | 0    | 0    | 0    | 0    | 0    | 0    |
| Bulleidia                                     | 0    | 0    | 0    | 0    | 0    | 0    | 0    | 0    | 0    | 0    | 0    | 0    | 0    | 0    | 0    | 0    | 0    | 0    | 0    | 0    | 0    | 0    |
| Peptococcus                                   | 0    | 0    | 0    | 0    | 0    | 0    | 0    | 0    | 0    | 0    | 0    | 0    | 0    | 0    | 0    | 0    | 0    | 0    | 0    | 0    | 0    | 0    |
| Serratia marcescens/nematodiphila             | 0    | 0    | 0    | 0    | 0    | 0    | 0    | 0    | 0    | 0    | 0    | 0    | 0    | 0    | 0    | 0    | 0    | 0    | 0    | 0    | 0    | 0    |
| Leptotrichia wadei                            | 0    | 0    | 0    | 0    | 0    | 0    | 0    | 0    | 0    | 0    | 0    | 0    | 0    | 0    | 0    | 0    | 0    | 0    | 0    | 0    | 0    | 0    |
| Neisseriaceae                                 | 0    | 0    | 0    | 0    | 0    | 0    | 0    | 0    | 0    | 0    | 0    | 0    | 0    | 0    | 0    | 0    | 0    | 0    | 0    | 0    | 0    | 0    |
| Aerococcus sanguinicola                       | 0    | 0    | 0    | 0    | 0    | 0    | 0    | 0    | 0    | 0    | 523  | 0    | 0    | 0    | 0    | 0    | 0    | 0    | 0    | 0    | 0    | 0    |
| Criobacterium bergeronii                      | 0    | 0    | 0    | 0    | 0    | 0    | 0    | 50   | 0    | 0    | 0    | 0    | 323  | 0    | 0    | 0    | 0    | 0    | 0    | 0    | 0    | 0    |
| Brevibacterium luteolum                       | 0    | 0    | 0    | 0    | 0    | 0    | 0    | 0    | 0    | 0    | 0    | 0    | 0    | 0    | 0    | 0    | 0    | 0    | 0    | 0    | 0    | 0    |
| Klebsiella pneumoniae                         | 0    | 0    | 0    | 0    | 0    | 0    | 0    | 0    | 0    | 0    | 0    | 0    | 0    | 0    | 0    | 0    | 0    | 0    | 0    | 0    | 0    | 0    |
| Actinomyces oris/viscosus                     | 0    | 0    | 0    | 0    | 0    | 0    | 0    | 0    | 0    | 0    | 0    | 0    | 0    | 0    | 0    | 0    | 0    | 0    | 0    | 0    | 0    | 0    |
| Mycobacterium chelonae complex                | 0    | 0    | 0    | 0    | 0    | 0    | 0    | 0    | 0    | 0    | 0    | 0    | 0    | 0    | 0    | 0    | 0    | 0    | 0    | 0    | 0    | 0    |
| Corynebacterium jeddahense                    | 0    | 0    | 0    | 0    | 0    | 0    | 0    | 0    | 0    | 0    | 0    | 0    | 0    | 0    | 0    | 0    | 0    | 0    | 0    | 0    | 0    | 0    |
| Peptostreptococcus stomatis                   | 0    | 0    | 0    | 0    | 0    | 0    | 0    | 0    | 0    | 0    | 0    | 0    | 0    | 0    | 0    | 0    | 0    | 0    | 0    | 0    | 0    | 0    |
| Megasphaera                                   | 0    | 0    | 0    | 0    | 0    | 0    | 0    | 0    | 0    | 38   | 0    | 0    | 625  | 0    | 0    | 0    | 0    | 0    | 0    | 0    | 0    | 0    |
| Campylobacter rectus/showae                   | 0    | 0    | 0    | 0    | 0    | 0    | 0    | 0    | 0    | 0    | 0    | 0    | 0    | 0    | 0    | 0    | 0    | 0    | 0    | 0    | 328  | 0    |
| Staphylococcus carnosus/condimenti            | 0    | 0    | 0    | 0    | 0    | 0    | 0    | 0    | 0    | 0    | 0    | 0    | 0    | 0    | 0    | 0    | 0    | 0    | 0    | 0    | 0    | 0    |
| Prevotella pallens                            | 0    | 0    | 0    | 0    | 0    | 0    | 0    | 0    | 0    | 0    | 0    | 0    | 0    | 0    | 0    | 0    | 0    | 0    | 0    | 0    | 0    | 0    |
| Prolinoborus fasciculus/Acinetobacter lwoffii | 0    | 0    | 0    | 0    | 0    | 0    | 0    | 0    | 0    | 0    | 0    | 0    | 0    | 0    | 0    | 0    | 0    | 0    | 0    | 0    | 0    | 0    |
| Staphylococcus nepalensis                     | 0    | 0    | 0    | 0    | 0    | 0    | 0    | 0    | 0    | 0    | 0    | 0    | 0    | 0    | 0    | 0    | 0    | 0    | 0    | 0    | 0    | 0    |
| Staphylococcaceae                             | 0    | 0    | 0    | 0    | 0    | 0    | 0    | 0    | 0    | 0    | 0    | 0    | 0    | 0    | 0    | 0    | 0    | 0    | 0    | 0    | 0    | 0    |
| Cruoricaptor                                  | 0    | 0    | 0    | 0    | 0    | 0    | 0    | 0    | 0    | 0    | 0    | 0    | 0    | 0    | 0    | 0    | 0    | 0    | 0    | 0    | 0    | 0    |
| [Eubacterium] hallii                          | 0    | 0    | 0    | 0    | 0    | 0    | 0    | 0    | 0    | 0    | 0    | 0    | 0    | 0    | 0    | 0    | 0    | 0    | 0    | 0    | 0    | 0    |
| BVAB1 (species)                               | 0    | 0    | 0    | 0    | 0    | 0    | 0    | 0    | 0    | 0    | 0    | 0    | 0    | 0    | 0    | 0    | 0    | 0    | 0    | 0    | 0    | 0    |
| Stomatobaculum                                | 0    | 0    | 0    | 0    | 0    | 0    | 0    | 0    | 0    | 0    | 0    | 0    | 0    | 0    | 0    | 0    | 0    | 0    | 0    | 0    | 0    | 0    |
| Mycoplasma                                    | 0    | 0    | 0    | 0    | 0    | 0    | 0    | 0    | 0    | 0    | 0    | 0    | 0    | 0    | 0    | 0    | 0    | 0    | 0    | 0    | 0    | 0    |
| Catenibacterium mitsuokai                     | 0    | 74   | 0    | 0    | 0    | 0    | 0    | 0    | 0    | 0    | 0    | 0    | 0    | 0    | 0    | 0    | 0    | 0    | 0    | 0    | 0    | 0    |
| Veillonella parvula                           | 0    | 0    | 0    | 0    | 0    | 0    | 0    | 0    | 0    | 0    | 0    | 0    | 0    | 0    | 0    | 0    | 0    | 0    | 0    | 0    | 238  | 0    |
| Corynebacterium kroppenstedtii                | 0    | 0    | 0    | 0    | 0    | 0    | 0    | 0    | 0    | 0    | 0    | 0    | 0    | 0    | 0    | 0    | 0    | 0    | 0    | 0    | 0    | 0    |
| Eremococcus coleocola                         | 0    | 0    | 0    | 0    | 0    | 0    | 0    | 0    | 0    | 0    | 0    | 0    | 0    | 0    | 0    | 0    | 0    | 0    | 0    | 0    | 0    | 0    |
| Actinomyces europaeus                         | 0    | 0    | 0    | 0    | 0    | 0    | 0    | 0    | 0    | 0    | 0    | 0    | 0    | 0    | 0    | 0    | 0    | 0    | 0    | 0    | 0    | 0    |
| Peptoniphilus senegalensis                    | 0    | 0    | 0    | 0    | 0    | 0    | 0    | 0    | 0    | 0    | 0    | 0    | 0    | 0    | 0    | 0    | 0    | 0    | 0    | 0    | 0    | 0    |
| Corynebacterium afermentans/humii             | 0    | 0    | 0    | 0    | 0    | 0    | 0    | 0    | 0    | 0    | 0    | 0    | 0    | 0    | 0    | 0    | 0    | 0    | 0    | 0    | 0    | 0    |
| Acinetobacter                                 | 0    | 0    | 0    | 0    | 0    | 0    | 0    | 0    | 0    | 0    | 0    | 0    | 0    | 0    | 0    | 0    | 0    | 0    | 0    | 0    | 0    | 0    |
| Eggerthellaceae                               | 0    | 0    | 0    | 0    | 36   | 0    | 0    | 0    | 0    | 0    | 0    | 0    | 0    | 0    | 0    | 0    | 0    | 0    | 0    | 0    | 0    | 0    |
| Corynebacterium mucifaciens                   | 0    | 0    | 0    | 0    | 0    | 0    | 0    | 0    | 0    | 0    | 0    | 0    | 0    | 0    | 0    | 0    | 0    | 0    | 0    | 0    | 0    | 0    |
| Filifactor                                    | 0    | 0    | 0    | 0    | 0    | 0    | 0    | 0    | 0    | 0    | 0    | 0    | 0    | 0    | 0    | 0    | 0    | 0    | 0    | 0    | 236  | 0    |
| Ruminococcus faecis                           | 0    | 0    | 0    | 0    | 0    | 0    | 0    | 0    | 0    | 0    | 0    | 0    | 0    | 0    | 0    | 0    | 0    | 0    | 0    | 0    | 0    | 0    |
| Lactobacillus                                 | 0    | 0    | 0    | 0    | 0    | 0    | 0    | 0    | 0    | 0    | 0    | 0    | 0    | 0    | 0    | 0    | 0    | 0    | 0    | 0    | 0    | 0    |
| Peptoniphilus grossensis/rhinitidis           | 0    | 0    | 0    | 0    | 0    | 0    | 0    | 0    | 0    | 0    | 0    | 0    | 0    | 0    | 0    | 0    | 0    | 0    | 0    | 0    | 0    | 0    |
| Aerococcus urinaequi/viridans                 | 0    | 0    | 0    | 0    | 0    | 0    | 0    | 0    | 0    | 0    | 0    | 0    | 0    | 0    | 0    | 0    | 0    | 0    | 0    | 0    | 0    | 0    |
| Anaerostipes hadrus                           | 0    | 0    | 0    | 0    | 0    | 0    | 0    | 0    | 0    | 0    | 0    | 0    | 0    | 0    | 0    | 0    | 0    | 0    | 0    | 0    | 0    | 0    |
| Lagierella                                    | 0    | 0    | 0    | 0    | 0    | 0    | 0    | 0    | 0    | 0    | 0    | 0    | 0    | 0    | 0    | 0    | 0    | 0    | 0    | 0    | 0    | 0    |
| Neisseria cinerea/meningitidis                | 0    | 0    | 0    | 0    | 0    | 0    | 0    | 0    | 0    | 0    | 0    | 0    | 0    | 0    | 0    | 0    | 0    | 0    | 0    | 0    | 0    | 0    |
| Micrococcus lylae                             | 0    | 0    | 0    | 0    | 0    | 0    | 0    | 0    | 0    | 0    | 0    | 0    | 0    | 0    | 0    | 0    | 0    | 0    | 0    | 0    | 0    | 0    |
| Staphylococcus cohnii                         | 0    | 0    | 0    | 0    | 0    | 0    | 0    | 0    | 0    | 0    | 0    | 0    | 0    | 0    | 0    | 0    | 0    | 0    | 0    | 0    | 0    | 0    |
| Casaltella massiliensis                       | 0    | 26   | 0    | 0    | 0    | 0    | 0    | 0    | 0    | 0    | 0    | 0    | 0    | 0    | 0    | 0    | 0    | 0    | 0    | 0    | 0    | 0    |
| Stomatobaculum longum                         | 0    | 0    | 0    | 0    | 0    | 0    | 0    | 0    | 0    | 0    | 0    | 0    | 0    | 0    | 0    | 0    | 0    | 0    | 0    | 0    | 0    | 0    |
| Lautropia                                     | 0    | 0    | 0    | 0    | 0    | 0    | 0    | 0    | 0    | 0    | 0    | 0    | 0    | 0    | 0    | 0    | 213  | 0    | 0    | 0    | 0    | 0    |
| Fastidiosipila                                | 0    | 0    | 0    | 0    | 0    | 0    | 0    | 0    | 0    | 0    | 0    | 0    | 0    | 0    | 0    | 0    | 0    | 0    | 0    | 0    | 0    | 0    |

Samples S282 - S311

| Species                                      | S282 | S283 | S285 | S286 | S289 | S290 | S291 | S292 | S293 | S295 | S296 | S297 | S298 | S299 | S301 | S302 | S306 | S307 | S308 | S309 | S310 | S311 |
|----------------------------------------------|------|------|------|------|------|------|------|------|------|------|------|------|------|------|------|------|------|------|------|------|------|------|
| Corynebacterium durum                        | 0    | 0    | 0    | 0    | 0    | 0    | 0    | 0    | 0    | 0    | 0    | 0    | 0    | 0    | 0    | 0    | 0    | 0    | 0    | 0    | 0    | 0    |
| Actinomyces graevenitzi                      | 0    | 0    | 0    | 0    | 0    | 0    | 0    | 0    | 0    | 0    | 0    | 0    | 0    | 0    | 0    | 0    | 0    | 0    | 0    | 0    | 0    | 0    |
| Staphylococcus cohnii/saprophyticus          | 0    | 0    | 0    | 0    | 0    | 0    | 0    | 0    | 0    | 0    | 0    | 0    | 0    | 0    | 0    | 0    | 0    | 0    | 0    | 0    | 0    | 0    |
| Leptotrichia trevisanii                      | 0    | 0    | 0    | 0    | 0    | 0    | 0    | 0    | 0    | 0    | 0    | 0    | 0    | 0    | 0    | 0    | 0    | 0    | 0    | 0    | 0    | 0    |
| Candidatus Paraburkholderia calva            | 0    | 0    | 0    | 0    | 0    | 0    | 0    | 0    | 0    | 0    | 0    | 0    | 0    | 0    | 0    | 0    | 0    | 0    | 0    | 0    | 0    | 0    |
| Actinomyces urogenitalis                     | 0    | 0    | 0    | 0    | 0    | 0    | 0    | 0    | 0    | 0    | 0    | 0    | 0    | 0    | 0    | 0    | 0    | 0    | 0    | 0    | 0    | 0    |
| Clostridiales                                | 0    | 0    | 0    | 0    | 0    | 0    | 0    | 29   | 0    | 0    | 0    | 0    | 0    | 0    | 0    | 0    | 0    | 0    | 0    | 0    | 0    | 0    |
| Pasteurella caballi                          | 0    | 0    | 0    | 0    | 0    | 0    | 0    | 0    | 0    | 0    | 0    | 0    | 0    | 0    | 0    | 0    | 0    | 0    | 0    | 0    | 0    | 0    |
| Fusobacterium hwasookii/nucleatum            | 0    | 0    | 0    | 0    | 0    | 0    | 0    | 0    | 0    | 0    | 0    | 0    | 0    | 0    | 0    | 0    | 0    | 0    | 0    | 0    | 0    | 0    |
| Corynebacterium riegelii                     | 0    | 0    | 0    | 0    | 0    | 0    | 0    | 0    | 0    | 0    | 0    | 0    | 0    | 0    | 0    | 0    | 0    | 0    | 0    | 0    | 0    | 0    |
| Hafnia                                       | 0    | 0    | 0    | 0    | 0    | 0    | 0    | 0    | 0    | 0    | 0    | 0    | 0    | 0    | 0    | 0    | 0    | 0    | 0    | 0    | 0    | 0    |
| Staphylococcus equorum/saprophyticus/xylosum | 0    | 0    | 0    | 0    | 0    | 0    | 0    | 0    | 0    | 0    | 0    | 0    | 0    | 0    | 0    | 0    | 0    | 0    | 0    | 0    | 0    | 0    |
| Acinetobacter lwoffii                        | 0    | 0    | 0    | 0    | 0    | 0    | 0    | 0    | 0    | 0    | 0    | 0    | 0    | 0    | 0    | 0    | 0    | 0    | 0    | 0    | 0    | 0    |
| Micrococcus cohnii                           | 0    | 0    | 0    | 0    | 0    | 0    | 0    | 0    | 0    | 0    | 0    | 0    | 0    | 0    | 0    | 0    | 0    | 0    | 0    | 0    | 0    | 0    |
| Pseudoclavibacter faecalis                   | 0    | 0    | 0    | 0    | 0    | 0    | 0    | 0    | 0    | 0    | 0    | 0    | 0    | 0    | 0    | 0    | 0    | 0    | 0    | 0    | 0    | 0    |
| Leptotrichia buccalis                        | 0    | 0    | 0    | 0    | 0    | 0    | 0    | 0    | 0    | 0    | 0    | 0    | 0    | 0    | 0    | 0    | 0    | 0    | 0    | 0    | 0    | 0    |
| Actinomyces                                  | 0    | 0    | 0    | 0    | 0    | 0    | 0    | 0    | 0    | 0    | 0    | 0    | 0    | 0    | 0    | 0    | 0    | 0    | 0    | 0    | 0    | 0    |
| Fusobacterium nucleatum/periodonticum        | 0    | 0    | 0    | 0    | 0    | 0    | 0    | 0    | 0    | 0    | 0    | 0    | 0    | 0    | 0    | 0    | 0    | 0    | 0    | 0    | 145  | 0    |
| Lactobacillus saerimneri                     | 0    | 0    | 0    | 0    | 0    | 0    | 0    | 0    | 0    | 0    | 0    | 0    | 0    | 0    | 0    | 0    | 0    | 0    | 0    | 0    | 0    | 0    |
| Actinomycetaceae                             | 0    | 0    | 0    | 0    | 0    | 0    | 0    | 0    | 0    | 0    | 0    | 0    | 0    | 0    | 0    | 0    | 0    | 0    | 0    | 0    | 0    | 0    |
| Dialister                                    | 0    | 0    | 0    | 0    | 0    | 0    | 0    | 0    | 95   | 0    | 0    | 0    | 0    | 0    | 0    | 0    | 0    | 0    | 0    | 0    | 0    | 0    |
| Neisseria mucosa/subflava                    | 0    | 0    | 0    | 0    | 0    | 0    | 0    | 0    | 0    | 0    | 0    | 0    | 0    | 0    | 0    | 0    | 0    | 0    | 0    | 0    | 0    | 0    |
| Paracoccus                                   | 0    | 0    | 0    | 0    | 0    | 0    | 0    | 0    | 0    | 0    | 0    | 0    | 0    | 0    | 0    | 0    | 0    | 0    | 0    | 0    | 0    | 0    |
| Acinetobacter haemolyticus/johnsonii         | 0    | 0    | 0    | 0    | 0    | 0    | 0    | 0    | 0    | 0    | 0    | 0    | 0    | 0    | 0    | 0    | 0    | 0    | 0    | 0    | 0    | 0    |
| Neisseria subflava                           | 0    | 0    | 0    | 0    | 0    | 0    | 0    | 0    | 0    | 0    | 0    | 0    | 0    | 0    | 0    | 0    | 0    | 0    | 0    | 0    | 0    | 0    |
| Acinetobacter proteolyticus                  | 0    | 0    | 0    | 0    | 0    | 0    | 0    | 0    | 0    | 0    | 0    | 0    | 0    | 0    | 0    | 0    | 0    | 0    | 0    | 0    | 0    | 0    |
| Dorea formicigenerans                        | 0    | 0    | 0    | 0    | 0    | 0    | 0    | 0    | 0    | 0    | 0    | 0    | 0    | 0    | 0    | 0    | 0    | 0    | 0    | 0    | 0    | 0    |
| Corynebacterium tuscaniense                  | 0    | 0    | 0    | 0    | 0    | 0    | 0    | 0    | 0    | 0    | 0    | 0    | 0    | 0    | 0    | 0    | 0    | 0    | 0    | 0    | 0    | 0    |
| Massiliomicrobiota timonensis                | 0    | 0    | 0    | 0    | 0    | 0    | 0    | 0    | 0    | 0    | 0    | 0    | 0    | 0    | 0    | 0    | 0    | 0    | 0    | 0    | 0    | 0    |
| Fusobacterium hwasookii                      | 0    | 0    | 0    | 0    | 0    | 0    | 0    | 0    | 0    | 0    | 0    | 0    | 0    | 0    | 0    | 0    | 0    | 0    | 0    | 0    | 0    | 0    |
| Pseudoglutamicibacter albus                  | 0    | 0    | 0    | 0    | 0    | 0    | 0    | 0    | 0    | 0    | 0    | 0    | 0    | 0    | 0    | 0    | 0    | 0    | 0    | 0    | 0    | 0    |
| Clostridiales Family XIII. Incertae Sedis    | 0    | 0    | 0    | 0    | 0    | 0    | 0    | 0    | 0    | 0    | 0    | 0    | 0    | 0    | 0    | 0    | 0    | 0    | 0    | 0    | 0    | 0    |
| Kocuria marina/rhizophila                    | 0    | 0    | 0    | 0    | 0    | 0    | 0    | 0    | 0    | 0    | 0    | 0    | 0    | 0    | 0    | 0    | 0    | 0    | 0    | 0    | 0    | 0    |
| Kocuria                                      | 0    | 0    | 0    | 0    | 0    | 0    | 0    | 0    | 0    | 0    | 0    | 0    | 0    | 0    | 0    | 0    | 0    | 0    | 0    | 0    | 0    | 0    |
| Alloprevotella rava                          | 0    | 0    | 0    | 0    | 0    | 0    | 0    | 0    | 0    | 0    | 0    | 0    | 0    | 0    | 0    | 0    | 0    | 0    | 0    | 0    | 0    | 0    |
| Staphylococcus pettenkoferi                  | 0    | 0    | 0    | 0    | 0    | 0    | 0    | 0    | 0    | 0    | 0    | 0    | 0    | 0    | 0    | 0    | 0    | 0    | 0    | 0    | 0    | 0    |
| Streptococcus pseudoporcinus                 | 0    | 0    | 0    | 0    | 0    | 0    | 0    | 0    | 0    | 0    | 0    | 0    | 0    | 0    | 0    | 0    | 0    | 0    | 0    | 0    | 0    | 0    |
| Kingella                                     | 0    | 0    | 0    | 0    | 0    | 0    | 0    | 0    | 0    | 0    | 0    | 0    | 0    | 0    | 0    | 0    | 0    | 0    | 0    | 0    | 0    | 0    |
| Eikenella                                    | 0    | 0    | 0    | 0    | 0    | 0    | 0    | 0    | 0    | 0    | 0    | 0    | 0    | 0    | 0    | 0    | 0    | 0    | 0    | 0    | 0    | 0    |
| Actinomyces odontolyticus                    | 0    | 0    | 0    | 0    | 0    | 0    | 0    | 0    | 0    | 0    | 0    | 0    | 0    | 0    | 0    | 0    | 0    | 0    | 0    | 0    | 0    | 0    |
| Corynebacterium sphenisci                    | 0    | 0    | 0    | 0    | 0    | 0    | 0    | 0    | 0    | 0    | 0    | 0    | 0    | 0    | 0    | 0    | 0    | 0    | 0    | 0    | 0    | 0    |
| Cutibacterium                                | 0    | 0    | 0    | 0    | 0    | 0    | 0    | 0    | 0    | 0    | 0    | 0    | 0    | 0    | 0    | 0    | 0    | 0    | 0    | 0    | 0    | 0    |
| Staphylococcus xylosum                       | 0    | 0    | 0    | 0    | 0    | 0    | 0    | 0    | 0    | 0    | 0    | 0    | 0    | 0    | 0    | 0    | 0    | 0    | 0    | 0    | 0    | 0    |
| Burkholderiales                              | 0    | 0    | 0    | 0    | 0    | 0    | 0    | 0    | 0    | 0    | 0    | 0    | 0    | 0    | 0    | 0    | 0    | 0    | 0    | 0    | 0    | 0    |
| Massiliomicrobiota/Mycoplasma                | 0    | 0    | 0    | 0    | 0    | 0    | 0    | 0    | 0    | 0    | 0    | 0    | 0    | 0    | 0    | 0    | 0    | 0    | 0    | 0    | 0    | 0    |
| Bacteroidales                                | 0    | 0    | 0    | 0    | 0    | 0    | 0    | 0    | 0    | 0    | 0    | 0    | 0    | 0    | 0    | 0    | 0    | 0    | 0    | 0    | 0    | 0    |
| Campylobacter fetus                          | 0    | 0    | 0    | 0    | 0    | 0    | 0    | 0    | 0    | 0    | 0    | 0    | 0    | 0    | 0    | 0    | 0    | 0    | 0    | 0    | 0    | 0    |
| Prevotella aurantiaca                        | 0    | 0    | 0    | 0    | 0    | 0    | 0    | 0    | 0    | 0    | 0    | 0    | 0    | 0    | 0    | 0    | 0    | 0    | 0    | 0    | 45   | 0    |
| Corynebacterium freneyi/xerosis              | 0    | 0    | 0    | 0    | 0    | 0    | 0    | 0    | 0    | 0    | 0    | 0    | 0    | 0    | 0    | 0    | 0    | 0    | 0    | 0    | 0    | 0    |
| Aerococcaceae                                | 0    | 0    | 0    | 0    | 0    | 0    | 0    | 0    | 0    | 0    | 0    | 0    | 0    | 0    | 0    | 0    | 0    | 0    | 0    | 0    | 0    | 0    |
| Moraxella lacunata                           | 0    | 0    | 0    | 0    | 0    | 0    | 0    | 0    | 0    | 0    | 0    | 0    | 0    | 0    | 0    | 0    | 0    | 0    | 0    | 0    | 0    | 0    |
| Corynebacterium accolens/macginleyi          | 0    | 0    | 0    | 0    | 0    | 0    | 0    | 0    | 0    | 0    | 0    | 0    | 0    | 0    | 0    | 0    | 0    | 0    | 0    | 0    | 0    | 0    |
| Massilia aurea                               | 0    | 0    | 0    | 0    | 0    | 0    | 0    | 0    | 0    | 0    | 0    | 0    | 0    | 0    | 0    | 0    | 0    | 0    | 0    | 0    | 0    | 0    |
| Corynebacterium casei                        | 0    | 0    | 0    | 0    | 0    | 0    | 0    | 0    | 0    | 0    | 0    | 0    | 0    | 0    | 0    | 0    | 0    | 0    | 0    | 0    | 0    | 0    |
| Helcococcus sueciensis                       | 0    | 0    | 0    | 0    | 0    | 0    | 0    | 0    | 0    | 0    | 0    | 0    | 0    | 0    | 0    | 0    | 0    | 0    | 0    | 0    | 0    | 0    |
| Lactobacillus casei/rhannosus                | 0    | 0    | 0    | 0    | 0    | 0    | 0    | 0    | 0    | 0    | 0    | 0    | 0    | 0    | 0    | 0    | 0    | 0    | 0    | 0    | 0    | 0    |
| Holdemanella biformis                        | 0    | 0    | 0    | 0    | 0    | 0    | 0    | 0    | 0    | 0    | 0    | 0    | 0    | 0    | 0    | 0    | 0    | 0    | 0    | 0    | 0    | 0    |
| Pelistega                                    | 0    | 0    | 0    | 0    | 0    | 0    | 0    | 0    | 0    | 0    | 0    | 0    | 0    | 0    | 0    | 0    | 0    | 0    | 0    | 0    | 0    | 0    |
| Actinomyces massiliensis                     | 0    | 0    | 0    | 0    | 0    | 0    | 0    | 0    | 0    | 0    | 0    | 0    | 0    | 0    | 0    | 0    | 0    | 0    | 0    | 0    | 0    | 0    |
| Massilia                                     | 0    | 0    | 0    | 0    | 0    | 0    | 0    | 0    | 0    | 0    | 0    | 0    | 0    | 0    | 0    | 0    | 0    | 0    | 0    | 0    | 0    | 0    |
| Staphylococcus equorum/xylosum               | 0    | 0    | 0    | 0    | 0    | 0    | 0    | 0    | 0    | 0    | 0    | 0    | 0    | 0    | 0    | 0    | 0    | 0    | 0    | 0    | 0    | 0    |
| Streptococcus                                | 0    | 0    | 0    | 0    | 0    | 0    | 0    | 0    | 0    | 0    | 0    | 0    | 0    | 0    | 0    | 0    | 0    | 0    | 0    | 0    | 0    | 0    |
| Cutibacterium avidum                         | 0    | 0    | 0    | 0    | 0    | 0    | 0    | 0    | 0    | 0    | 0    | 0    | 0    | 0    | 0    | 0    | 0    | 0    | 0    | 0    | 0    | 0    |

Samples S313 - S349

| Species                                              | S313  | S316 | S318  | S319  | S320  | S321  | S322  | S323  | S325  | S327  | S328  | S333  | S335  | S336  | S337  | S340 | S342  | S343 | S344 | S345 | S346 | S349 |
|------------------------------------------------------|-------|------|-------|-------|-------|-------|-------|-------|-------|-------|-------|-------|-------|-------|-------|------|-------|------|------|------|------|------|
| Streptococcus mitis group                            | 28163 | 9484 | 11261 | 32    | 0     | 8870  | 0     | 1656  | 0     | 4039  | 25    | 33    | 22312 | 0     | 16034 | 0    | 0     | 3432 | 0    | 190  | 446  | 912  |
| Lactobacillus iners                                  | 0     | 0    | 0     | 0     | 0     | 0     | 0     | 0     | 0     | 0     | 0     | 0     | 0     | 0     | 0     | 0    | 0     | 0    | 0    | 0    | 0    | 0    |
| Gardnerella vaginalis                                | 0     | 0    | 0     | 6692  | 0     | 0     | 0     | 19834 | 0     | 0     | 35    | 0     | 0     | 0     | 0     | 0    | 0     | 1582 | 0    | 0    | 260  | 0    |
| Corynebacterium pseudogenitalium/tuberculoostearicum | 0     | 41   | 39    | 0     | 14189 | 81    | 88    | 0     | 4862  | 164   | 72    | 214   | 0     | 922   | 486   | 9082 | 0     | 0    | 32   | 0    | 0    | 293  |
| Streptococcus agalactiae                             | 0     | 0    | 0     | 0     | 0     | 0     | 0     | 49    | 0     | 0     | 0     | 0     | 130   | 50236 | 0     | 0    | 0     | 0    | 0    | 0    | 0    | 0    |
| Veillonella montpellierensis                         | 0     | 0    | 0     | 2850  | 0     | 0     | 0     | 5639  | 0     | 0     | 167   | 0     | 0     | 0     | 0     | 0    | 0     | 0    | 0    | 0    | 4808 | 0    |
| Streptococcus anginosus                              | 252   | 6836 | 0     | 0     | 0     | 0     | 0     | 0     | 0     | 31    | 0     | 43    | 0     | 0     | 64378 | 0    | 0     | 38   | 0    | 0    | 0    | 0    |
| Chlamydia trachomatis                                | 0     | 0    | 0     | 167   | 2606  | 0     | 0     | 0     | 30599 | 5585  | 0     | 35    | 0     | 0     | 0     | 0    | 0     | 0    | 1362 | 0    | 0    | 0    |
| Haemophilus parainfluenzae                           | 509   | 1377 | 0     | 0     | 0     | 23515 | 0     | 0     | 0     | 47    | 0     | 329   | 904   | 29389 | 37493 | 0    | 0     | 92   | 0    | 0    | 148  | 0    |
| Finegoldia magna                                     | 457   | 856  | 0     | 0     | 1323  | 351   | 0     | 0     | 232   | 371   | 0     | 3240  | 0     | 40583 | 16917 | 177  | 0     | 0    | 1792 | 0    | 1249 | 94   |
| Peptoniphilus asaccharolyticus/grossensis/harei      | 651   | 100  | 0     | 0     | 0     | 1039  | 0     | 0     | 0     | 157   | 553   | 13485 | 716   | 0     | 12776 | 0    | 0     | 285  | 1968 | 0    | 942  | 149  |
| Sneathia amnii                                       | 0     | 0    | 0     | 4061  | 0     | 0     | 0     | 31314 | 0     | 0     | 408   | 1617  | 0     | 0     | 0     | 0    | 0     | 0    | 0    | 0    | 0    | 0    |
| Staphylococcus caprae/cohnii/epidermidis             | 0     | 0    | 0     | 0     | 378   | 43    | 161   | 0     | 1748  | 1187  | 0     | 172   | 0     | 1404  | 150   | 1156 | 0     | 44   | 0    | 0    | 0    | 151  |
| Gemella haemolysans/taiwanensis                      | 379   | 1948 | 0     | 0     | 0     | 0     | 0     | 0     | 0     | 320   | 0     | 0     | 255   | 0     | 1446  | 0    | 0     | 315  | 0    | 0    | 0    | 0    |
| Sneathia sanguinogens                                | 0     | 0    | 0     | 0     | 0     | 0     | 0     | 0     | 0     | 0     | 0     | 0     | 0     | 0     | 0     | 0    | 0     | 0    | 0    | 0    | 7347 | 0    |
| Mycoplasma genitalium                                | 179   | 0    | 0     | 0     | 0     | 1523  | 0     | 0     | 0     | 54632 | 170   | 0     | 0     | 0     | 0     | 0    | 0     | 0    | 0    | 9429 | 0    | 3632 |
| Mycoplasma penetrans                                 | 0     | 0    | 0     | 0     | 0     | 0     | 0     | 0     | 0     | 0     | 0     | 0     | 0     | 0     | 0     | 0    | 0     | 0    | 0    | 0    | 0    | 0    |
| Haemophilus haemolyticus/quentini                    | 453   | 29   | 0     | 0     | 0     | 0     | 0     | 50    | 0     | 0     | 0     | 0     | 0     | 0     | 7313  | 0    | 0     | 0    | 0    | 225  | 370  | 0    |
| Corynebacterium pyruviciproducens                    | 0     | 0    | 0     | 0     | 0     | 0     | 0     | 0     | 0     | 0     | 0     | 467   | 0     | 33274 | 5461  | 0    | 0     | 0    | 25   | 0    | 185  | 0    |
| Anaerococcus prevotii/tetradicus                     | 0     | 0    | 443   | 143   | 581   | 390   | 0     | 0     | 27    | 31    | 0     | 2449  | 0     | 5040  | 107   | 0    | 0     | 239  | 215  | 0    | 2542 | 124  |
| Haemophilus influenzae                               | 0     | 0    | 0     | 0     | 0     | 0     | 0     | 0     | 0     | 0     | 104   | 0     | 0     | 0     | 0     | 0    | 17694 | 0    | 0    | 0    | 0    | 0    |
| Staphylococcus epidermidis/hominis                   | 0     | 67   | 0     | 0     | 466   | 0     | 0     | 0     | 1692  | 352   | 0     | 173   | 0     | 0     | 0     | 129  | 0     | 0    | 0    | 0    | 0    | 0    |
| Atopobium vaginae                                    | 0     | 0    | 0     | 2017  | 0     | 0     | 0     | 0     | 0     | 0     | 0     | 0     | 0     | 0     | 0     | 0    | 0     | 0    | 0    | 0    | 0    | 0    |
| Ureaplasma parvum/urealyticum                        | 1402  | 0    | 1023  | 360   | 0     | 0     | 31591 | 6634  | 0     | 0     | 0     | 0     | 0     | 7937  | 0     | 0    | 0     | 0    | 0    | 8167 | 148  | 0    |
| Prevotella timonensis                                | 0     | 0    | 0     | 0     | 0     | 0     | 0     | 0     | 0     | 0     | 3631  | 5090  | 485   | 0     | 6762  | 0    | 0     | 0    | 286  | 0    | 0    | 36   |
| Fenollaria massiliensis/timonensis                   | 0     | 0    | 0     | 0     | 0     | 0     | 0     | 0     | 0     | 246   | 2704  | 1846  | 216   | 0     | 0     | 0    | 0     | 0    | 0    | 0    | 0    | 0    |
| Anaerococcus                                         | 0     | 0    | 0     | 787   | 25    | 0     | 0     | 0     | 183   | 0     | 490   | 468   | 0     | 1011  | 0     | 0    | 0     | 415  | 1175 | 0    | 0    | 87   |
| Corynebacterium coyleae                              | 0     | 0    | 0     | 0     | 236   | 211   | 0     | 0     | 88    | 87    | 0     | 803   | 0     | 0     | 43    | 0    | 0     | 872  | 623  | 0    | 0    | 0    |
| Prevotella bivia                                     | 796   | 6606 | 0     | 0     | 0     | 0     | 0     | 0     | 0     | 0     | 0     | 101   | 0     | 0     | 26604 | 0    | 0     | 0    | 169  | 0    | 0    | 0    |
| Prevotella melaninogenica                            | 0     | 80   | 0     | 10424 | 0     | 0     | 0     | 4686  | 0     | 73    | 0     | 122   | 0     | 0     | 137   | 0    | 0     | 0    | 0    | 0    | 0    | 0    |
| Corynebacterium aurimucosum/minutissimum/singulare   | 0     | 0    | 0     | 0     | 5821  | 0     | 0     | 0     | 1836  | 0     | 0     | 0     | 0     | 0     | 50    | 520  | 0     | 0    | 0    | 0    | 0    | 111  |
| Staphylococcus aureus                                | 0     | 0    | 0     | 0     | 0     | 0     | 0     | 0     | 0     | 2774  | 0     | 0     | 0     | 0     | 0     | 0    | 0     | 0    | 0    | 0    | 0    | 0    |
| Anaerococcus lactolyticus                            | 0     | 0    | 0     | 0     | 0     | 27    | 0     | 0     | 0     | 56    | 316   | 300   | 0     | 0     | 0     | 0    | 0     | 0    | 0    | 0    | 131  | 0    |
| Aerococcus christensenii                             | 0     | 0    | 0     | 0     | 0     | 0     | 0     | 1553  | 0     | 42    | 0     | 0     | 0     | 0     | 0     | 0    | 0     | 0    | 0    | 0    | 68   | 0    |
| Corynebacterium glucuronolyticum                     | 0     | 4273 | 0     | 0     | 429   | 0     | 0     | 0     | 30    | 0     | 0     | 0     | 0     | 1672  | 0     | 87   | 0     | 0    | 0    | 0    | 151  | 0    |
| Veillonella atypica                                  | 0     | 5528 | 0     | 0     | 0     | 0     | 0     | 0     | 0     | 73    | 0     | 0     | 0     | 0     | 1544  | 0    | 0     | 0    | 0    | 0    | 0    | 0    |
| Veillonella                                          | 0     | 0    | 0     | 0     | 0     | 0     | 0     | 0     | 0     | 495   | 0     | 0     | 0     | 0     | 1200  | 0    | 0     | 190  | 0    | 0    | 0    | 0    |
| Mycoplasma hominis                                   | 0     | 0    | 0     | 0     | 0     | 0     | 0     | 0     | 0     | 0     | 0     | 0     | 0     | 0     | 0     | 0    | 0     | 0    | 0    | 0    | 0    | 0    |
| Granulicatella elegans                               | 0     | 0    | 0     | 0     | 0     | 0     | 0     | 0     | 0     | 108   | 0     | 48    | 0     | 0     | 0     | 0    | 0     | 172  | 0    | 0    | 550  | 0    |
| Ezakiella                                            | 0     | 0    | 0     | 0     | 46    | 173   | 0     | 0     | 0     | 76    | 1703  | 10340 | 0     | 0     | 0     | 0    | 0     | 0    | 0    | 0    | 0    | 0    |
| Shigella/Escherichia                                 | 0     | 0    | 0     | 0     | 0     | 0     | 0     | 0     | 0     | 0     | 0     | 0     | 0     | 0     | 0     | 0    | 0     | 0    | 0    | 0    | 0    | 0    |
| Streptococcus salivarius                             | 0     | 32   | 0     | 0     | 0     | 0     | 0     | 0     | 0     | 412   | 0     | 0     | 0     | 0     | 164   | 0    | 0     | 0    | 0    | 0    | 0    | 0    |
| Actinomyces turicensis                               | 0     | 0    | 0     | 0     | 0     | 83    | 0     | 0     | 0     | 0     | 390   | 581   | 69    | 0     | 7773  | 0    | 0     | 88   | 168  | 0    | 0    | 0    |
| Prevotella corporis                                  | 0     | 0    | 0     | 0     | 0     | 0     | 0     | 0     | 0     | 598   | 19261 | 0     | 0     | 0     | 0     | 0    | 0     | 0    | 0    | 0    | 0    | 0    |
| Corynebacterium simulans                             | 0     | 29   | 0     | 0     | 0     | 1325  | 162   | 0     | 0     | 0     | 59    | 0     | 0     | 4801  | 0     | 0    | 0     | 0    | 0    | 0    | 0    | 0    |
| Fusobacterium equinum                                | 0     | 0    | 0     | 0     | 0     | 0     | 0     | 0     | 0     | 0     | 63    | 964   | 0     | 0     | 7914  | 0    | 0     | 0    | 0    | 0    | 0    | 0    |
| Corynebacterium                                      | 0     | 0    | 0     | 0     | 1991  | 0     | 0     | 0     | 0     | 0     | 57    | 54    | 137   | 189   | 0     | 103  | 30    | 0    | 0    | 0    | 0    | 0    |
| Staphylococcus haemolyticus                          | 0     | 85   | 0     | 0     | 129   | 261   | 0     | 0     | 905   | 151   | 0     | 0     | 0     | 873   | 42    | 1994 | 0     | 0    | 0    | 0    | 0    | 0    |
| Gemella asaccharolytica                              | 0     | 0    | 0     | 447   | 0     | 0     | 0     | 0     | 0     | 0     | 212   | 0     | 0     | 0     | 0     | 0    | 0     | 0    | 0    | 0    | 0    | 0    |
| Peptoniphilus                                        | 0     | 0    | 0     | 0     | 92    | 0     | 0     | 0     | 0     | 198   | 1221  | 5045  | 227   | 0     | 0     | 0    | 0     | 0    | 0    | 0    | 0    | 37   |
| Corynebacterium hadale/imitans                       | 0     | 0    | 0     | 0     | 1017  | 0     | 0     | 0     | 65    | 0     | 0     | 0     | 0     | 0     | 0     | 71   | 0     | 0    | 0    | 0    | 0    | 0    |
| Eggerthella sp. type 1 (species)                     | 0     | 0    | 0     | 618   | 0     | 0     | 0     | 0     | 0     | 0     | 0     | 0     | 0     | 0     | 0     | 0    | 0     | 0    | 0    | 0    | 0    | 0    |
| Prevotella disiens                                   | 25    | 0    | 0     | 0     | 0     | 0     | 0     | 0     | 0     | 0     | 0     | 211   | 0     | 0     | 6161  | 0    | 0     | 0    | 216  | 0    | 0    | 0    |
| Peptoniphilus lacrimalis                             | 0     | 0    | 0     | 0     | 0     | 0     | 0     | 0     | 0     | 472   | 1328  | 3099  | 0     | 0     | 56    | 0    | 0     | 0    | 0    | 0    | 0    | 0    |
| Anaerococcus vaginalis                               | 0     | 0    | 0     | 0     | 0     | 145   | 0     | 0     | 0     | 0     | 0     | 2302  | 0     | 0     | 0     | 0    | 0     | 0    | 0    | 0    | 0    | 105  |
| Facklamia hominis                                    | 0     | 0    | 0     | 0     | 0     | 0     | 0     | 0     | 0     | 26    | 0     | 415   | 29    | 0     | 0     | 0    | 0     | 120  | 401  | 0    | 0    | 0    |
| Prevotella amnii                                     | 0     | 0    | 0     | 0     | 0     | 0     | 0     | 0     | 0     | 0     | 0     | 0     | 0     | 0     | 0     | 0    | 0     | 0    | 0    | 0    | 0    | 0    |
| Campylobacter ureolyticus                            | 0     | 0    | 0     | 0     | 0     | 25    | 0     | 0     | 0     | 46    | 290   | 3865  | 112   | 0     | 3188  | 0    | 0     | 0    | 124  | 0    | 0    | 0    |
| BVAB2 (species)                                      | 0     | 0    | 0     | 0     | 0     | 0     | 0     | 0     | 0     | 120   | 0     | 0     | 0     | 0     | 0     | 0    | 0     | 0    | 0    | 0    | 0    | 0    |
| Haemophilus                                          | 0     | 0    | 0     | 0     | 0     | 0     | 0     | 0     | 0     | 0     | 0     | 0     | 0     | 0     | 104   | 0    | 0     | 0    | 0    | 0    | 0    | 0    |
| Anaerococcus hydrogenalis/rubeifantiss               | 0     | 0    | 0     | 0     | 35    | 0     | 0     | 0     | 0     | 0     | 0     | 0     | 0     | 1033  | 220   | 0    | 0     | 0    | 80   | 0    | 0    | 0    |
| Anaerococcus mediterraneensis                        | 0     | 0    | 0     | 0     | 95    | 0     | 0     | 0     | 0     | 36    | 0     | 7913  | 0     | 0     | 0     | 0    | 0     | 0    | 188  | 0    | 0    | 0    |
| Dialister sp. type 2                                 | 0     | 0    | 0     | 0     | 0     | 0     | 0     | 0     | 0     | 348   | 2919  | 41    | 0     | 0     | 0     | 0    | 0     | 0    | 0    | 0    | 0    | 0    |
| Dialister micraerophilus                             | 57    | 0    | 0     | 0     | 0     | 0     | 0     | 0     | 0     | 25    | 440   | 357   | 0     | 0     | 5177  | 0    | 0     | 0    | 0    | 0    | 0    | 0    |
| Corynebacterium amycolatum                           | 0     | 0    | 0     | 0     | 136   | 0     | 0     | 0     | 0     | 0     | 0     | 0     | 0     | 0     | 0     | 0    | 0     | 0    | 0    | 0    | 0    | 0    |
| Ureaplasma                                           | 0     | 0    | 0     | 0     | 0     |       |       |       |       |       |       |       |       |       |       |      |       |      |      |      |      |      |



# Samples S313 - S349

| Species                                                 | S313 | S316 | S318 | S319 | S320 | S321 | S322 | S323 | S325 | S327 | S328 | S333  | S335 | S336 | S337 | S340 | S342 | S343 | S344 | S345 | S346 | S349 |
|---------------------------------------------------------|------|------|------|------|------|------|------|------|------|------|------|-------|------|------|------|------|------|------|------|------|------|------|
| Peptoniphilus rhinitidis                                | 0    | 0    | 0    | 0    | 216  | 0    | 0    | 0    | 81   | 73   | 0    | 0     | 0    | 510  | 1918 | 0    | 0    | 0    | 0    | 0    | 0    | 0    |
| Anaerococcus senegalensis                               | 0    | 200  | 0    | 0    | 565  | 0    | 0    | 0    | 0    | 0    | 0    | 0     | 0    | 8671 | 0    | 57   | 0    | 0    | 0    | 0    | 0    | 0    |
| Peptostreptococcus anaerobius                           | 28   | 39   | 0    | 0    | 0    | 124  | 0    | 0    | 0    | 0    | 0    | 1589  | 0    | 0    | 6985 | 0    | 0    | 0    | 0    | 0    | 0    | 0    |
| Dialister propionificiens                               | 0    | 0    | 0    | 0    | 0    | 0    | 0    | 0    | 0    | 53   | 97   | 10099 | 0    | 0    | 2077 | 0    | 0    | 0    | 0    | 0    | 0    | 0    |
| Peptoniphilus harei                                     | 0    | 0    | 0    | 0    | 300  | 0    | 0    | 0    | 0    | 0    | 0    | 0     | 0    | 6204 | 0    | 0    | 0    | 0    | 0    | 0    | 0    | 71   |
| Negativicoccus succinivorans                            | 0    | 0    | 0    | 0    | 147  | 0    | 0    | 0    | 0    | 0    | 0    | 50    | 0    | 0    | 225  | 0    | 0    | 0    | 162  | 0    | 0    | 50   |
| Parvimonas micra                                        | 0    | 0    | 0    | 0    | 0    | 0    | 0    | 0    | 0    | 382  | 0    | 0     | 0    | 0    | 0    | 0    | 0    | 0    | 0    | 0    | 0    | 0    |
| Actinomyces ihumii                                      | 0    | 0    | 0    | 0    | 0    | 0    | 0    | 0    | 0    | 0    | 0    | 540   | 0    | 0    | 0    | 0    | 0    | 0    | 0    | 0    | 0    | 0    |
| Actinotignum timonense                                  | 0    | 0    | 0    | 0    | 0    | 0    | 0    | 0    | 0    | 0    | 0    | 38    | 0    | 0    | 2970 | 0    | 0    | 0    | 87   | 0    | 0    | 0    |
| Fenollaria                                              | 0    | 0    | 0    | 0    | 0    | 0    | 0    | 0    | 0    | 197  | 2543 | 683   | 0    | 0    | 0    | 0    | 0    | 0    | 0    | 0    | 0    | 0    |
| Fusobacterium massiliense                               | 0    | 0    | 0    | 0    | 0    | 0    | 0    | 0    | 0    | 0    | 0    | 0     | 0    | 0    | 0    | 0    | 0    | 0    | 0    | 0    | 0    | 0    |
| Actinobaculum massiliense                               | 0    | 0    | 0    | 0    | 0    | 0    | 0    | 0    | 0    | 0    | 0    | 0     | 0    | 0    | 0    | 0    | 0    | 0    | 0    | 0    | 0    | 0    |
| Peptoniphilus coxii                                     | 0    | 0    | 0    | 0    | 0    | 0    | 0    | 0    | 0    | 102  | 0    | 117   | 49   | 0    | 0    | 0    | 0    | 0    | 444  | 0    | 0    | 0    |
| Staphylococcus lugdunensis                              | 28   | 0    | 0    | 0    | 0    | 0    | 0    | 0    | 0    | 0    | 0    | 0     | 0    | 0    | 35   | 0    | 0    | 0    | 0    | 0    | 0    | 0    |
| Dermabacter                                             | 0    | 0    | 0    | 0    | 331  | 0    | 0    | 0    | 164  | 0    | 0    | 0     | 0    | 79   | 0    | 0    | 0    | 0    | 0    | 0    | 0    | 0    |
| Alloscardovia omnicolens                                | 0    | 108  | 0    | 0    | 0    | 0    | 0    | 0    | 0    | 0    | 0    | 0     | 0    | 0    | 227  | 0    | 0    | 0    | 0    | 0    | 0    | 0    |
| Varibaculum cambriense                                  | 0    | 0    | 0    | 0    | 0    | 0    | 0    | 0    | 0    | 0    | 901  | 11034 | 0    | 0    | 223  | 0    | 0    | 76   | 29   | 0    | 0    | 0    |
| Streptococcus urinalis                                  | 0    | 0    | 0    | 0    | 0    | 79   | 0    | 0    | 0    | 0    | 0    | 0     | 140  | 0    | 0    | 0    | 0    | 0    | 0    | 0    | 0    | 0    |
| Corynebacterium appendicis                              | 0    | 0    | 0    | 0    | 186  | 0    | 0    | 0    | 27   | 0    | 0    | 0     | 0    | 0    | 0    | 0    | 0    | 0    | 0    | 0    | 0    | 0    |
| Actinotignum schaalii                                   | 0    | 0    | 0    | 0    | 0    | 0    | 0    | 0    | 0    | 0    | 0    | 0     | 0    | 0    | 0    | 0    | 0    | 0    | 318  | 0    | 0    | 0    |
| Corynebacterium timonense                               | 0    | 0    | 0    | 0    | 0    | 0    | 0    | 0    | 0    | 0    | 61   | 0     | 0    | 0    | 0    | 0    | 0    | 220  | 0    | 0    | 0    | 0    |
| Gemella                                                 | 0    | 0    | 0    | 0    | 0    | 0    | 0    | 0    | 0    | 48   | 0    | 0     | 0    | 0    | 0    | 0    | 0    | 0    | 0    | 0    | 0    | 0    |
| Klebsiella aerogenes/Enterobacter asburiae              | 0    | 0    | 0    | 0    | 0    | 0    | 0    | 0    | 0    | 0    | 0    | 0     | 0    | 0    | 0    | 0    | 0    | 0    | 0    | 0    | 0    | 0    |
| Fusobacterium periodonticum                             | 0    | 42   | 0    | 0    | 0    | 0    | 0    | 0    | 0    | 0    | 0    | 624   | 0    | 0    | 980  | 0    | 0    | 0    | 0    | 0    | 0    | 0    |
| Veillonella dispar                                      | 0    | 0    | 0    | 0    | 0    | 0    | 0    | 0    | 0    | 627  | 0    | 0     | 0    | 0    | 186  | 0    | 0    | 0    | 0    | 0    | 0    | 0    |
| Prevotella colorans                                     | 0    | 0    | 0    | 0    | 0    | 0    | 0    | 0    | 0    | 303  | 603  | 98    | 0    | 0    | 0    | 0    | 0    | 0    | 0    | 0    | 0    | 0    |
| Candidatus Peptoniphilus massiliensis                   | 0    | 0    | 0    | 0    | 80   | 0    | 0    | 0    | 55   | 624  | 2374 | 0     | 0    | 0    | 0    | 0    | 0    | 0    | 0    | 0    | 0    | 0    |
| Eremococcus                                             | 0    | 0    | 0    | 0    | 491  | 0    | 0    | 0    | 55   | 0    | 0    | 0     | 0    | 0    | 0    | 0    | 0    | 0    | 0    | 0    | 0    | 0    |
| Varibaculum anthropi                                    | 0    | 0    | 0    | 0    | 0    | 0    | 0    | 0    | 0    | 0    | 0    | 0     | 0    | 0    | 0    | 0    | 0    | 0    | 0    | 0    | 0    | 0    |
| Propionimicrobium lymphophilum                          | 0    | 0    | 0    | 0    | 0    | 0    | 0    | 0    | 0    | 0    | 0    | 0     | 0    | 0    | 578  | 0    | 0    | 0    | 39   | 0    | 0    | 0    |
| Streptococcus dysgalactiae                              | 0    | 0    | 0    | 0    | 0    | 0    | 0    | 0    | 0    | 0    | 0    | 0     | 0    | 0    | 0    | 0    | 0    | 0    | 0    | 0    | 0    | 0    |
| Negativicoccus                                          | 0    | 0    | 0    | 0    | 0    | 0    | 0    | 0    | 0    | 0    | 0    | 0     | 0    | 0    | 51   | 0    | 0    | 0    | 0    | 0    | 0    | 0    |
| Porphyromonas somerae                                   | 0    | 0    | 0    | 0    | 0    | 0    | 0    | 0    | 0    | 0    | 0    | 2945  | 0    | 0    | 0    | 0    | 0    | 0    | 758  | 0    | 0    | 0    |
| Corynebacterium jeikeium                                | 0    | 0    | 0    | 0    | 0    | 0    | 0    | 0    | 0    | 0    | 0    | 0     | 0    | 0    | 0    | 0    | 0    | 0    | 0    | 0    | 0    | 47   |
| Mobiluncus curtisii                                     | 0    | 0    | 0    | 0    | 0    | 0    | 0    | 0    | 0    | 47   | 767  | 339   | 0    | 0    | 0    | 0    | 0    | 0    | 32   | 0    | 0    | 0    |
| Porphyromonas uenonis                                   | 0    | 0    | 0    | 0    | 0    | 0    | 0    | 0    | 0    | 0    | 1533 | 4333  | 117  | 0    | 0    | 0    | 0    | 0    | 0    | 0    | 0    | 41   |
| Aerococcus urinae                                       | 0    | 0    | 0    | 0    | 0    | 0    | 0    | 0    | 0    | 0    | 0    | 0     | 0    | 0    | 0    | 0    | 0    | 0    | 0    | 0    | 0    | 0    |
| Corynebacterium mycetoides                              | 0    | 0    | 0    | 0    | 0    | 0    | 0    | 0    | 0    | 0    | 0    | 0     | 0    | 0    | 0    | 0    | 0    | 0    | 0    | 0    | 0    | 0    |
| Cutibacterium acnes                                     | 0    | 0    | 0    | 0    | 0    | 0    | 0    | 0    | 0    | 52   | 0    | 0     | 0    | 0    | 0    | 145  | 0    | 0    | 0    | 0    | 0    | 0    |
| Urinacoccus massiliensis                                | 0    | 0    | 0    | 0    | 0    | 0    | 0    | 0    | 0    | 64   | 26   | 3745  | 55   | 0    | 0    | 0    | 0    | 36   | 194  | 0    | 0    | 0    |
| Campylobacter hominis                                   | 0    | 0    | 0    | 0    | 0    | 0    | 0    | 0    | 0    | 0    | 0    | 31    | 0    | 0    | 0    | 0    | 0    | 0    | 0    | 0    | 0    | 0    |
| Staphylococcus capitis/caprae                           | 0    | 0    | 0    | 0    | 295  | 0    | 0    | 0    | 0    | 0    | 0    | 0     | 0    | 0    | 0    | 0    | 0    | 0    | 0    | 0    | 0    | 0    |
| Sneathia                                                | 0    | 0    | 0    | 0    | 0    | 0    | 0    | 0    | 0    | 131  | 2097 | 0     | 0    | 0    | 0    | 0    | 0    | 0    | 0    | 0    | 0    | 0    |
| Prevotella jejuni                                       | 0    | 237  | 0    | 0    | 0    | 0    | 0    | 0    | 0    | 0    | 0    | 71    | 0    | 0    | 0    | 0    | 0    | 0    | 0    | 0    | 0    | 0    |
| Varibaculum                                             | 0    | 0    | 0    | 0    | 0    | 0    | 0    | 0    | 0    | 0    | 0    | 174   | 0    | 0    | 0    | 0    | 0    | 0    | 92   | 0    | 0    | 0    |
| Corynebacterium striatum                                | 0    | 0    | 0    | 0    | 0    | 0    | 0    | 0    | 0    | 0    | 0    | 0     | 0    | 0    | 0    | 0    | 0    | 0    | 0    | 0    | 0    | 0    |
| Jonquetella anthropi                                    | 0    | 0    | 0    | 0    | 0    | 0    | 0    | 0    | 0    | 0    | 54   | 0     | 0    | 0    | 0    | 0    | 0    | 0    | 0    | 0    | 0    | 0    |
| Peptoniphilus koenoeniae                                | 0    | 0    | 0    | 0    | 0    | 0    | 0    | 0    | 0    | 52   | 520  | 135   | 0    | 0    | 0    | 0    | 0    | 0    | 0    | 0    | 0    | 0    |
| Bifidobacterium longum                                  | 0    | 0    | 0    | 0    | 0    | 0    | 0    | 0    | 0    | 0    | 0    | 0     | 0    | 0    | 0    | 0    | 0    | 0    | 0    | 0    | 0    | 0    |
| Helicobacter                                            | 0    | 0    | 0    | 0    | 0    | 0    | 0    | 0    | 0    | 0    | 0    | 0     | 0    | 0    | 0    | 0    | 0    | 0    | 0    | 0    | 0    | 0    |
| Lawsonella clevelandensis                               | 0    | 0    | 0    | 0    | 0    | 0    | 0    | 0    | 0    | 97   | 156  | 207   | 0    | 0    | 0    | 0    | 0    | 0    | 0    | 0    | 0    | 0    |
| Escherichia coli/fergusonii                             | 0    | 0    | 0    | 0    | 0    | 0    | 0    | 0    | 0    | 0    | 0    | 0     | 0    | 0    | 0    | 0    | 0    | 0    | 0    | 0    | 0    | 0    |
| Fusobacterium nucleatum                                 | 0    | 0    | 0    | 0    | 0    | 0    | 0    | 0    | 0    | 0    | 1215 | 0     | 0    | 0    | 0    | 0    | 0    | 0    | 0    | 0    | 0    | 0    |
| Porphyromonas asaccharolytica                           | 0    | 0    | 0    | 0    | 0    | 0    | 0    | 0    | 0    | 0    | 0    | 2219  | 0    | 0    | 0    | 0    | 0    | 0    | 0    | 0    | 0    | 0    |
| Anaerococcus octavius                                   | 0    | 0    | 0    | 0    | 131  | 0    | 0    | 0    | 92   | 135  | 0    | 0     | 0    | 0    | 0    | 0    | 0    | 0    | 0    | 0    | 0    | 0    |
| Fusobacterium                                           | 0    | 0    | 0    | 0    | 0    | 0    | 0    | 0    | 0    | 0    | 0    | 0     | 0    | 0    | 0    | 0    | 0    | 0    | 0    | 0    | 0    | 0    |
| Corynebacterium phoceense                               | 0    | 0    | 0    | 0    | 0    | 0    | 0    | 0    | 0    | 0    | 0    | 0     | 0    | 0    | 0    | 0    | 0    | 0    | 0    | 0    | 0    | 0    |
| Ruminococcus                                            | 0    | 0    | 0    | 0    | 41   | 0    | 0    | 0    | 0    | 0    | 0    | 0     | 0    | 0    | 1900 | 0    | 0    | 0    | 0    | 0    | 0    | 0    |
| Arcanobacterium                                         | 0    | 0    | 0    | 0    | 0    | 0    | 0    | 0    | 0    | 49   | 445  | 0     | 0    | 0    | 0    | 0    | 0    | 0    | 0    | 0    | 0    | 0    |
| Khoudiadiopia                                           | 0    | 0    | 0    | 0    | 0    | 0    | 0    | 0    | 0    | 124  | 0    | 189   | 0    | 0    | 0    | 0    | 0    | 0    | 0    | 0    | 0    | 0    |
| Atopobium deltae                                        | 0    | 0    | 0    | 0    | 0    | 0    | 0    | 0    | 0    | 74   | 272  | 0     | 0    | 0    | 0    | 0    | 0    | 0    | 0    | 0    | 0    | 0    |
| Haemophilus paraaerolyticus                             | 0    | 0    | 0    | 0    | 0    | 0    | 0    | 0    | 0    | 0    | 0    | 0     | 0    | 0    | 0    | 0    | 0    | 0    | 0    | 0    | 0    | 0    |
| Howardella                                              | 0    | 0    | 0    | 0    | 0    | 0    | 0    | 0    | 0    | 0    | 103  | 175   | 0    | 0    | 0    | 0    | 0    | 0    | 0    | 0    | 0    | 0    |
| Prevotella buccalis                                     | 0    | 0    | 0    | 0    | 25   | 0    | 0    | 0    | 0    | 0    | 735  | 79    | 54   | 0    | 0    | 0    | 0    | 0    | 0    | 0    | 0    | 0    |
| Corynebacterium auris                                   | 0    | 0    | 0    | 0    | 0    | 0    | 0    | 0    | 0    | 0    | 0    | 0     | 0    | 0    | 0    | 0    | 0    | 0    | 0    | 0    | 0    | 0    |
| Candidatus Mycoplasma gireddii                          | 0    | 0    | 0    | 0    | 0    | 0    | 0    | 0    | 0    | 0    | 0    | 0     | 0    | 0    | 0    | 0    | 0    | 0    | 0    | 0    | 0    | 0    |
| Alloicoccus                                             | 0    | 0    | 0    | 0    | 0    | 0    | 0    | 0    | 0    | 92   | 0    | 0     | 0    | 0    | 0    | 0    | 0    | 0    | 0    | 0    | 0    | 0    |
| Corynebacterium fountainii/mucifaciens/ureicelerivorans | 0    | 0    | 0    | 0    | 0    | 0    | 0    | 0    | 0    | 0    | 0    | 0     | 0    | 0    | 0    | 0    | 0    | 0    | 0    | 0    | 0    | 0    |
| Corynebacterium auris/timonense                         | 0    | 0    | 0    | 0    | 0    | 0    | 0    | 0    | 0    | 0    | 0    | 0     | 0    | 0    | 0    | 0    | 0    | 0    | 0    | 0    | 0    | 0    |
| Veillonella ratti/seminalis                             | 0    | 0    | 0    | 0    | 0    | 0    | 0    | 0    | 0    | 0    | 0    | 0     | 0    | 0    | 180  | 0    | 0    | 0    | 0    | 0    | 0    | 0    |

Samples S313 - S349

| Species                                    | S313 | S316 | S318 | S319 | S320 | S321 | S322 | S323 | S325 | S327 | S328 | S333 | S335 | S336 | S337 | S340 | S342 | S343 | S344 | S345 | S346 | S349 |
|--------------------------------------------|------|------|------|------|------|------|------|------|------|------|------|------|------|------|------|------|------|------|------|------|------|------|
| Lactobacillus gasseri                      | 0    | 0    | 0    | 0    | 0    | 0    | 0    | 0    | 0    | 0    | 0    | 0    | 0    | 0    | 0    | 0    | 0    | 0    | 0    | 0    | 0    | 0    |
| Tissierella                                | 0    | 0    | 0    | 0    | 0    | 0    | 0    | 0    | 0    | 0    | 942  | 0    | 0    | 0    | 0    | 0    | 0    | 0    | 0    | 0    | 0    | 0    |
| Granulicatella adiacens                    | 0    | 0    | 0    | 0    | 0    | 0    | 0    | 0    | 0    | 396  | 0    | 0    | 0    | 0    | 0    | 0    | 0    | 0    | 0    | 0    | 0    | 0    |
| Sutterella                                 | 27   | 0    | 0    | 0    | 0    | 0    | 0    | 0    | 0    | 0    | 44   | 42   | 0    | 0    | 0    | 0    | 0    | 0    | 0    | 0    | 0    | 0    |
| Prevotella nanceiensis                     | 0    | 0    | 0    | 0    | 0    | 0    | 0    | 0    | 0    | 0    | 0    | 39   | 0    | 0    | 275  | 0    | 0    | 47   | 0    | 0    | 0    | 0    |
| Lactobacillus jensenii                     | 0    | 0    | 0    | 0    | 0    | 0    | 0    | 0    | 0    | 0    | 0    | 0    | 0    | 0    | 0    | 0    | 0    | 0    | 0    | 0    | 0    | 0    |
| Lactobacillus crispatus                    | 0    | 0    | 0    | 0    | 0    | 0    | 0    | 0    | 0    | 0    | 0    | 0    | 0    | 0    | 0    | 0    | 0    | 0    | 0    | 0    | 0    | 0    |
| Candidate Division TM7 vaginal (genus)     | 0    | 0    | 0    | 0    | 0    | 0    | 0    | 0    | 0    | 0    | 0    | 0    | 0    | 0    | 0    | 0    | 0    | 0    | 0    | 0    | 0    | 0    |
| Candidatus Saccharimonas                   | 0    | 0    | 0    | 0    | 0    | 0    | 0    | 0    | 0    | 0    | 0    | 0    | 0    | 0    | 0    | 0    | 0    | 0    | 0    | 0    | 0    | 0    |
| Peptococcus niger                          | 0    | 0    | 0    | 0    | 0    | 0    | 0    | 0    | 0    | 43   | 49   | 4230 | 0    | 0    | 0    | 0    | 0    | 0    | 0    | 0    | 0    | 0    |
| Neisseria flavescens/perflava              | 0    | 28   | 0    | 0    | 0    | 0    | 0    | 0    | 0    | 0    | 0    | 0    | 0    | 0    | 0    | 0    | 0    | 0    | 0    | 0    | 0    | 0    |
| Gemella sanguinis                          | 0    | 0    | 0    | 0    | 0    | 0    | 0    | 0    | 0    | 91   | 0    | 0    | 0    | 0    | 0    | 0    | 0    | 0    | 0    | 0    | 0    | 0    |
| Porphyromonas                              | 0    | 0    | 0    | 0    | 0    | 0    | 0    | 0    | 0    | 0    | 915  | 37   | 0    | 0    | 44   | 0    | 0    | 0    | 0    | 0    | 0    | 0    |
| Prevotella                                 | 0    | 50   | 0    | 539  | 0    | 0    | 0    | 0    | 0    | 121  | 257  | 0    | 0    | 0    | 414  | 0    | 0    | 0    | 0    | 0    | 0    | 0    |
| Corynebacterium thomssenii                 | 0    | 0    | 0    | 0    | 0    | 0    | 0    | 0    | 0    | 0    | 0    | 0    | 0    | 0    | 0    | 0    | 0    | 0    | 0    | 0    | 0    | 0    |
| Lachnospiraceae                            | 0    | 0    | 0    | 0    | 0    | 0    | 0    | 0    | 0    | 0    | 221  | 0    | 0    | 0    | 0    | 0    | 0    | 0    | 0    | 0    | 0    | 0    |
| Corynebacterium tuberculostearicum         | 0    | 0    | 0    | 0    | 0    | 0    | 0    | 0    | 0    | 0    | 0    | 0    | 0    | 0    | 0    | 0    | 0    | 0    | 0    | 0    | 0    | 0    |
| Dermabacter hominis                        | 0    | 0    | 0    | 0    | 0    | 0    | 0    | 0    | 0    | 0    | 0    | 0    | 0    | 650  | 0    | 0    | 0    | 0    | 0    | 0    | 0    | 0    |
| Veillonella rogosae                        | 0    | 0    | 0    | 0    | 0    | 0    | 0    | 0    | 0    | 0    | 0    | 0    | 0    | 0    | 412  | 0    | 0    | 0    | 0    | 0    | 0    | 0    |
| Actinomyces hongkongensis                  | 0    | 0    | 0    | 0    | 0    | 0    | 0    | 0    | 0    | 0    | 0    | 0    | 0    | 0    | 0    | 0    | 0    | 0    | 0    | 0    | 0    | 0    |
| Veillonella parvula/rogosae                | 0    | 0    | 0    | 0    | 0    | 0    | 0    | 0    | 0    | 0    | 0    | 0    | 0    | 0    | 287  | 0    | 0    | 0    | 0    | 0    | 0    | 0    |
| Anaerococcus provencensis                  | 0    | 0    | 0    | 0    | 464  | 0    | 0    | 0    | 51   | 109  | 0    | 0    | 0    | 0    | 0    | 0    | 0    | 0    | 0    | 0    | 0    | 0    |
| Porphyromonas sp. type 1                   | 0    | 0    | 0    | 0    | 0    | 0    | 0    | 0    | 0    | 0    | 870  | 0    | 0    | 0    | 0    | 0    | 0    | 0    | 0    | 0    | 0    | 0    |
| Brevibacterium paucivorans                 | 0    | 0    | 0    | 0    | 79   | 0    | 0    | 0    | 0    | 0    | 0    | 0    | 0    | 0    | 0    | 0    | 0    | 0    | 0    | 0    | 0    | 0    |
| Peptostreptococcus                         | 0    | 0    | 0    | 0    | 0    | 0    | 0    | 0    | 0    | 0    | 199  | 142  | 0    | 0    | 1456 | 0    | 0    | 0    | 0    | 0    | 0    | 0    |
| Facklamia languida                         | 0    | 0    | 0    | 0    | 40   | 0    | 0    | 0    | 0    | 0    | 0    | 0    | 0    | 0    | 0    | 0    | 0    | 0    | 0    | 0    | 0    | 0    |
| Streptobacillus                            | 0    | 0    | 0    | 0    | 0    | 0    | 0    | 0    | 0    | 0    | 0    | 0    | 0    | 0    | 0    | 0    | 0    | 0    | 0    | 0    | 0    | 0    |
| Gemella haemolysans                        | 0    | 0    | 0    | 0    | 0    | 0    | 0    | 0    | 0    | 0    | 0    | 0    | 0    | 0    | 0    | 0    | 0    | 77   | 0    | 0    | 0    | 0    |
| Haemophilus sputorum                       | 0    | 0    | 0    | 0    | 0    | 0    | 0    | 0    | 0    | 0    | 0    | 0    | 0    | 0    | 0    | 0    | 0    | 0    | 0    | 0    | 0    | 0    |
| Actinotignum urinale                       | 0    | 0    | 0    | 0    | 0    | 0    | 0    | 0    | 0    | 0    | 0    | 0    | 0    | 0    | 0    | 0    | 0    | 0    | 0    | 0    | 0    | 0    |
| Dialister pneumosintes                     | 0    | 0    | 0    | 0    | 0    | 0    | 0    | 0    | 0    | 0    | 0    | 0    | 0    | 0    | 0    | 0    | 0    | 0    | 0    | 0    | 0    | 0    |
| Treponema pallidum                         | 0    | 0    | 0    | 0    | 0    | 0    | 0    | 0    | 0    | 0    | 0    | 0    | 0    | 0    | 0    | 0    | 0    | 0    | 0    | 0    | 0    | 0    |
| Porphyromonas bennoniis                    | 0    | 0    | 0    | 0    | 0    | 0    | 0    | 0    | 0    | 0    | 83   | 0    | 0    | 0    | 0    | 0    | 0    | 0    | 0    | 0    | 0    | 0    |
| Bergeyella                                 | 0    | 0    | 0    | 0    | 0    | 0    | 0    | 0    | 0    | 0    | 0    | 0    | 0    | 0    | 0    | 0    | 0    | 0    | 0    | 0    | 0    | 0    |
| Actinotignum schaalii/timonense            | 0    | 0    | 0    | 0    | 0    | 0    | 0    | 0    | 0    | 0    | 0    | 0    | 0    | 0    | 0    | 0    | 0    | 0    | 0    | 0    | 0    | 0    |
| Klebsiella aerogenes/Kluyvera cryocrescens | 0    | 0    | 0    | 0    | 0    | 0    | 0    | 0    | 0    | 0    | 0    | 0    | 0    | 0    | 0    | 0    | 0    | 0    | 0    | 0    | 0    | 0    |
| Rothia mucilaginosa                        | 0    | 0    | 0    | 0    | 0    | 0    | 0    | 0    | 0    | 639  | 0    | 0    | 0    | 0    | 0    | 0    | 0    | 0    | 0    | 0    | 0    | 0    |
| Solobacterium moorei                       | 0    | 0    | 0    | 0    | 0    | 0    | 0    | 0    | 0    | 0    | 0    | 0    | 0    | 0    | 122  | 0    | 0    | 0    | 0    | 0    | 0    | 0    |
| Mageeibacillus indolicus                   | 0    | 0    | 0    | 0    | 0    | 0    | 0    | 0    | 0    | 0    | 0    | 0    | 0    | 0    | 0    | 0    | 0    | 0    | 0    | 0    | 0    | 0    |
| Serratia urelytica                         | 0    | 0    | 0    | 0    | 0    | 0    | 0    | 0    | 0    | 0    | 0    | 0    | 0    | 0    | 0    | 0    | 0    | 0    | 0    | 0    | 0    | 0    |
| Peptoniphilus obesi                        | 0    | 0    | 0    | 0    | 26   | 0    | 0    | 0    | 0    | 0    | 59   | 376  | 0    | 0    | 0    | 0    | 0    | 0    | 0    | 0    | 0    | 0    |
| Peptoniphilus harei/phoceensis             | 0    | 0    | 0    | 0    | 0    | 0    | 0    | 0    | 0    | 0    | 0    | 0    | 0    | 0    | 0    | 0    | 0    | 0    | 0    | 0    | 0    | 0    |
| Corynebacterium atypicum                   | 0    | 0    | 0    | 0    | 28   | 193  | 0    | 0    | 0    | 0    | 0    | 0    | 0    | 0    | 0    | 0    | 0    | 0    | 0    | 0    | 0    | 0    |
| Atopobium minutum                          | 0    | 0    | 0    | 0    | 0    | 0    | 0    | 0    | 0    | 0    | 0    | 1207 | 0    | 0    | 0    | 0    | 0    | 0    | 0    | 0    | 0    | 0    |
| Corynebacterium genitalium                 | 0    | 0    | 0    | 0    | 0    | 0    | 0    | 0    | 0    | 0    | 0    | 0    | 0    | 0    | 0    | 0    | 0    | 0    | 0    | 0    | 0    | 0    |
| Bifidobacterium tsurumiense                | 0    | 0    | 0    | 0    | 0    | 0    | 0    | 0    | 0    | 0    | 0    | 0    | 0    | 0    | 0    | 0    | 0    | 0    | 0    | 0    | 0    | 0    |
| Micrococcus                                | 0    | 0    | 0    | 0    | 0    | 0    | 0    | 0    | 0    | 0    | 0    | 0    | 0    | 0    | 0    | 136  | 0    | 0    | 0    | 0    | 0    | 0    |
| Megasphaera genomsp. type_1                | 0    | 0    | 0    | 0    | 0    | 0    | 0    | 0    | 0    | 0    | 0    | 0    | 0    | 0    | 0    | 0    | 0    | 0    | 0    | 0    | 0    | 0    |
| Enhydrobacter                              | 0    | 0    | 0    | 0    | 90   | 0    | 0    | 0    | 0    | 0    | 0    | 0    | 0    | 0    | 0    | 0    | 0    | 0    | 0    | 0    | 0    | 0    |
| Fastidiosipila sanguinis                   | 0    | 0    | 0    | 0    | 0    | 0    | 0    | 0    | 0    | 0    | 0    | 0    | 0    | 0    | 0    | 0    | 0    | 0    | 52   | 0    | 0    | 0    |
| Prevotellamassilia                         | 0    | 79   | 0    | 644  | 0    | 0    | 0    | 0    | 0    | 0    | 0    | 0    | 0    | 0    | 950  | 0    | 0    | 0    | 0    | 0    | 0    | 0    |
| Peptostreptococcaceae                      | 0    | 0    | 0    | 0    | 0    | 0    | 0    | 0    | 0    | 190  | 44   | 0    | 0    | 0    | 0    | 0    | 0    | 0    | 0    | 0    | 0    | 0    |
| Morganella morganii                        | 0    | 0    | 0    | 0    | 0    | 0    | 0    | 0    | 0    | 0    | 0    | 48   | 0    | 0    | 0    | 0    | 0    | 0    | 0    | 0    | 0    | 0    |
| Neofamilia                                 | 0    | 0    | 0    | 0    | 0    | 0    | 0    | 0    | 0    | 0    | 0    | 0    | 0    | 0    | 0    | 0    | 0    | 0    | 0    | 0    | 0    | 0    |
| Pseudoclavibacter bifida                   | 0    | 0    | 0    | 0    | 198  | 0    | 0    | 0    | 0    | 0    | 0    | 0    | 0    | 0    | 0    | 0    | 0    | 0    | 0    | 0    | 0    | 0    |
| Helcococcus                                | 0    | 0    | 0    | 0    | 0    | 0    | 0    | 0    | 0    | 0    | 0    | 0    | 0    | 0    | 0    | 0    | 0    | 0    | 0    | 0    | 0    | 0    |
| Brevibacterium ravenpurgense               | 0    | 0    | 0    | 0    | 0    | 0    | 0    | 0    | 0    | 0    | 0    | 0    | 0    | 0    | 0    | 0    | 0    | 0    | 0    | 0    | 0    | 0    |
| Moryella indoligenes                       | 0    | 0    | 0    | 0    | 0    | 0    | 0    | 0    | 0    | 0    | 316  | 63   | 0    | 0    | 0    | 0    | 0    | 0    | 0    | 0    | 0    | 0    |
| Olegusella massiliensis                    | 0    | 0    | 0    | 0    | 0    | 0    | 0    | 0    | 0    | 0    | 27   | 73   | 0    | 0    | 0    | 0    | 0    | 0    | 0    | 0    | 0    | 0    |
| Morococcus cerebrosus                      | 0    | 0    | 0    | 0    | 0    | 0    | 0    | 0    | 0    | 63   | 0    | 0    | 0    | 0    | 0    | 0    | 0    | 0    | 0    | 0    | 0    | 0    |
| Prevotella scopos                          | 0    | 0    | 0    | 0    | 0    | 0    | 0    | 0    | 0    | 0    | 0    | 0    | 0    | 0    | 439  | 0    | 0    | 0    | 0    | 0    | 0    | 0    |
| Veillonella parvula/tobetsuensis           | 0    | 0    | 0    | 0    | 0    | 0    | 0    | 0    | 0    | 0    | 0    | 0    | 0    | 0    | 0    | 0    | 0    | 0    | 0    | 0    | 0    | 0    |
| Moryella                                   | 0    | 0    | 0    | 0    | 0    | 0    | 0    | 0    | 0    | 0    | 506  | 74   | 0    | 0    | 0    | 0    | 0    | 0    | 0    | 0    | 0    | 0    |
| Atopobium parvulum                         | 0    | 0    | 0    | 0    | 0    | 0    | 0    | 0    | 0    | 54   | 0    | 0    | 0    | 0    | 52   | 0    | 0    | 0    | 0    | 0    | 0    | 0    |
| Serratia marcescens                        | 0    | 0    | 0    | 0    | 0    | 0    | 0    | 0    | 0    | 0    | 0    | 0    | 0    | 0    | 0    | 0    | 0    | 0    | 0    | 0    | 0    | 0    |
| Collinsella aerofaciens                    | 0    | 0    | 0    | 0    | 0    | 0    | 0    | 0    | 0    | 0    | 0    | 0    | 0    | 0    | 0    | 0    | 0    | 0    | 0    | 0    | 0    | 0    |
| Curvibacter                                | 0    | 0    | 0    | 0    | 0    | 0    | 0    | 0    | 0    | 0    | 0    | 0    | 0    | 0    | 0    | 0    | 0    | 0    | 0    | 0    | 0    | 0    |
| Rothia dentocariosa                        | 0    | 0    | 0    | 0    | 0    | 0    | 0    | 0    | 0    | 0    | 441  | 0    | 0    | 0    | 0    | 0    | 0    | 0    | 0    | 0    | 0    | 0    |
| Prevotella bergensis                       | 0    | 0    | 0    | 0    | 0    | 0    | 0    | 0    | 0    | 0    | 0    | 378  | 0    | 0    | 31   | 0    | 0    | 0    | 0    | 0    | 0    | 0    |
| Corynebacterium sundsvallense              | 0    | 0    | 0    | 0    | 0    | 0    | 0    | 0    | 0    | 0    | 0    | 0    | 0    | 0    | 0    | 0    | 0    | 0    | 0    | 0    | 0    | 0    |

Samples S313 - S349

| Species                                       | S313 | S316 | S318 | S319 | S320 | S321 | S322 | S323 | S325 | S327 | S328 | S333 | S335 | S336 | S337 | S340 | S342 | S343 | S344 | S345 | S346 | S349 |
|-----------------------------------------------|------|------|------|------|------|------|------|------|------|------|------|------|------|------|------|------|------|------|------|------|------|------|
| Coriobacteria                                 | 0    | 0    | 0    | 0    | 0    | 0    | 0    | 0    | 0    | 0    | 0    | 0    | 0    | 0    | 0    | 0    | 0    | 0    | 0    | 0    | 0    | 0    |
| Neisseria meningitidis                        | 0    | 0    | 0    | 0    | 0    | 0    | 0    | 0    | 0    | 0    | 0    | 0    | 0    | 0    | 0    | 0    | 0    | 0    | 0    | 0    | 0    | 0    |
| Dermacoccus nishinomiyaensis                  | 0    | 0    | 0    | 0    | 0    | 0    | 0    | 0    | 0    | 0    | 0    | 0    | 0    | 0    | 0    | 0    | 0    | 0    | 0    | 0    | 0    | 0    |
| Leptotrichia                                  | 0    | 0    | 0    | 0    | 0    | 0    | 0    | 0    | 0    | 95   | 0    | 0    | 0    | 0    | 0    | 0    | 0    | 0    | 0    | 0    | 0    | 0    |
| Microbacteriaceae                             | 0    | 0    | 0    | 0    | 0    | 0    | 0    | 0    | 0    | 0    | 0    | 0    | 0    | 0    | 0    | 0    | 0    | 0    | 0    | 0    | 0    | 0    |
| Klebsiella pneumoniae/variiicola              | 0    | 0    | 0    | 0    | 0    | 0    | 0    | 0    | 0    | 0    | 0    | 0    | 0    | 0    | 0    | 0    | 0    | 0    | 0    | 0    | 0    | 0    |
| Hafnia alvei                                  | 0    | 0    | 0    | 0    | 0    | 0    | 0    | 0    | 0    | 0    | 0    | 0    | 0    | 0    | 0    | 0    | 0    | 0    | 0    | 0    | 0    | 0    |
| Caulobacter                                   | 0    | 0    | 0    | 0    | 0    | 0    | 0    | 0    | 0    | 0    | 0    | 0    | 0    | 0    | 0    | 0    | 0    | 0    | 0    | 0    | 0    | 0    |
| Lactobacillus reuteri                         | 0    | 0    | 0    | 0    | 0    | 0    | 0    | 0    | 0    | 0    | 0    | 0    | 0    | 0    | 0    | 0    | 0    | 0    | 0    | 0    | 0    | 0    |
| Gemella morbillorum                           | 0    | 0    | 0    | 0    | 0    | 0    | 0    | 0    | 0    | 0    | 0    | 0    | 0    | 0    | 0    | 0    | 0    | 0    | 0    | 0    | 0    | 0    |
| Rothia                                        | 0    | 0    | 0    | 0    | 0    | 0    | 0    | 0    | 0    | 0    | 0    | 0    | 0    | 0    | 0    | 0    | 0    | 0    | 0    | 0    | 0    | 0    |
| Campylobacter                                 | 0    | 0    | 0    | 0    | 0    | 0    | 0    | 0    | 0    | 0    | 0    | 0    | 0    | 0    | 0    | 0    | 0    | 0    | 0    | 0    | 0    | 0    |
| Prevotella genogroup 3                        | 0    | 0    | 0    | 0    | 0    | 0    | 0    | 0    | 0    | 0    | 0    | 0    | 0    | 0    | 0    | 0    | 0    | 0    | 0    | 0    | 0    | 0    |
| Staphylococcus warneri                        | 0    | 0    | 0    | 0    | 0    | 0    | 0    | 0    | 0    | 0    | 0    | 0    | 0    | 0    | 0    | 0    | 0    | 0    | 0    | 0    | 0    | 0    |
| Blautia wexlerae                              | 0    | 0    | 0    | 0    | 0    | 0    | 0    | 0    | 0    | 0    | 0    | 0    | 0    | 0    | 0    | 0    | 0    | 0    | 0    | 0    | 0    | 0    |
| Lachnoanaerobaculum                           | 0    | 0    | 0    | 0    | 0    | 0    | 0    | 0    | 0    | 0    | 0    | 0    | 0    | 0    | 0    | 0    | 0    | 0    | 0    | 0    | 0    | 0    |
| Anaerococcus hydrogenalis/senegalensis        | 0    | 0    | 0    | 0    | 0    | 0    | 0    | 0    | 0    | 0    | 0    | 0    | 0    | 0    | 0    | 0    | 0    | 0    | 0    | 0    | 0    | 0    |
| Brevibacterium mcbrellneri                    | 0    | 0    | 0    | 0    | 0    | 0    | 0    | 0    | 0    | 0    | 0    | 0    | 0    | 0    | 0    | 0    | 0    | 0    | 0    | 0    | 0    | 0    |
| Corynebacterium glaucum                       | 0    | 0    | 0    | 0    | 0    | 0    | 0    | 0    | 0    | 0    | 0    | 0    | 0    | 0    | 0    | 0    | 0    | 0    | 0    | 0    | 0    | 0    |
| Prevotella salivae                            | 0    | 0    | 0    | 0    | 0    | 0    | 0    | 0    | 0    | 0    | 0    | 0    | 0    | 0    | 0    | 0    | 0    | 0    | 0    | 0    | 0    | 0    |
| Coriobacteriaceae                             | 0    | 0    | 0    | 0    | 0    | 0    | 0    | 0    | 0    | 0    | 0    | 163  | 0    | 0    | 0    | 0    | 0    | 0    | 0    | 0    | 0    | 0    |
| Bulleidia                                     | 0    | 0    | 0    | 0    | 0    | 0    | 0    | 0    | 0    | 0    | 0    | 0    | 0    | 0    | 0    | 0    | 0    | 0    | 0    | 0    | 0    | 0    |
| Peptococcus                                   | 0    | 0    | 0    | 0    | 0    | 0    | 0    | 0    | 0    | 0    | 0    | 0    | 0    | 0    | 0    | 0    | 0    | 0    | 0    | 0    | 0    | 0    |
| Serratia marcescens/nematodiphila             | 0    | 0    | 0    | 0    | 0    | 0    | 0    | 0    | 0    | 0    | 0    | 0    | 0    | 0    | 0    | 0    | 0    | 0    | 0    | 0    | 0    | 0    |
| Leptotrichia wadei                            | 0    | 0    | 0    | 0    | 0    | 0    | 0    | 0    | 0    | 0    | 0    | 0    | 0    | 0    | 0    | 0    | 0    | 0    | 0    | 0    | 0    | 0    |
| Neisseriaceae                                 | 0    | 0    | 0    | 0    | 0    | 0    | 0    | 0    | 0    | 0    | 206  | 0    | 0    | 0    | 0    | 0    | 0    | 0    | 0    | 0    | 0    | 0    |
| Aerococcus sanguinicola                       | 0    | 0    | 0    | 0    | 0    | 0    | 0    | 0    | 0    | 0    | 0    | 0    | 0    | 0    | 0    | 0    | 0    | 0    | 0    | 0    | 0    | 0    |
| Criobacterium bergeronii                      | 0    | 0    | 0    | 0    | 0    | 0    | 0    | 0    | 0    | 0    | 27   | 0    | 0    | 0    | 0    | 0    | 0    | 0    | 0    | 0    | 0    | 0    |
| Brevibacterium luteolum                       | 0    | 0    | 0    | 0    | 0    | 0    | 0    | 0    | 0    | 0    | 0    | 0    | 0    | 0    | 0    | 0    | 0    | 0    | 0    | 0    | 0    | 0    |
| Klebsiella pneumoniae                         | 0    | 0    | 0    | 0    | 0    | 0    | 0    | 0    | 0    | 0    | 0    | 0    | 0    | 0    | 0    | 0    | 0    | 0    | 0    | 0    | 0    | 0    |
| Actinomyces oris/viscosus                     | 0    | 0    | 0    | 0    | 0    | 0    | 0    | 0    | 0    | 362  | 0    | 0    | 0    | 0    | 0    | 0    | 0    | 0    | 0    | 0    | 0    | 0    |
| Mycobacterium chelonae complex                | 0    | 0    | 0    | 0    | 0    | 0    | 0    | 0    | 0    | 0    | 0    | 0    | 0    | 0    | 0    | 0    | 0    | 0    | 0    | 0    | 0    | 0    |
| Corynebacterium jeddahense                    | 0    | 0    | 0    | 0    | 0    | 0    | 0    | 0    | 0    | 0    | 0    | 0    | 0    | 0    | 0    | 0    | 0    | 0    | 0    | 0    | 0    | 0    |
| Peptostreptococcus stomatis                   | 0    | 0    | 0    | 0    | 0    | 0    | 0    | 0    | 0    | 49   | 0    | 0    | 0    | 0    | 0    | 0    | 0    | 0    | 0    | 0    | 0    | 0    |
| Megasphaera                                   | 0    | 0    | 0    | 0    | 0    | 0    | 0    | 0    | 0    | 0    | 0    | 25   | 0    | 0    | 0    | 0    | 0    | 0    | 0    | 0    | 0    | 0    |
| Campylobacter rectus/showae                   | 0    | 0    | 0    | 0    | 0    | 0    | 0    | 0    | 0    | 0    | 0    | 0    | 0    | 0    | 0    | 0    | 0    | 0    | 0    | 0    | 0    | 0    |
| Staphylococcus carnosus/condimenti            | 0    | 0    | 0    | 0    | 0    | 0    | 0    | 0    | 0    | 0    | 0    | 0    | 0    | 0    | 0    | 0    | 0    | 0    | 0    | 0    | 0    | 0    |
| Prevotella pallens                            | 0    | 29   | 0    | 0    | 0    | 0    | 0    | 0    | 0    | 0    | 0    | 0    | 0    | 0    | 0    | 0    | 0    | 0    | 0    | 0    | 0    | 0    |
| Prolinoborus fasciculus/Acinetobacter lwoffii | 0    | 0    | 0    | 0    | 0    | 0    | 0    | 0    | 0    | 0    | 0    | 0    | 0    | 0    | 0    | 45   | 0    | 0    | 0    | 0    | 0    | 0    |
| Staphylococcus nepalensis                     | 0    | 0    | 0    | 0    | 0    | 0    | 0    | 0    | 0    | 0    | 0    | 0    | 0    | 0    | 0    | 0    | 0    | 0    | 0    | 0    | 0    | 0    |
| Staphylococcaceae                             | 0    | 0    | 0    | 0    | 0    | 0    | 0    | 0    | 0    | 0    | 0    | 0    | 0    | 0    | 0    | 0    | 0    | 0    | 0    | 0    | 0    | 0    |
| Cruoricaptor                                  | 0    | 0    | 0    | 0    | 0    | 0    | 0    | 0    | 0    | 0    | 0    | 0    | 0    | 0    | 0    | 0    | 0    | 0    | 0    | 0    | 0    | 0    |
| [Eubacterium] hallii                          | 0    | 0    | 0    | 0    | 0    | 0    | 0    | 0    | 0    | 0    | 0    | 0    | 0    | 0    | 0    | 0    | 0    | 0    | 0    | 0    | 0    | 0    |
| BVAB1 (species)                               | 0    | 0    | 0    | 0    | 0    | 0    | 0    | 0    | 0    | 0    | 0    | 0    | 0    | 0    | 0    | 0    | 0    | 0    | 0    | 0    | 0    | 0    |
| Stomatobaculum                                | 0    | 0    | 0    | 0    | 0    | 0    | 0    | 0    | 0    | 0    | 0    | 0    | 0    | 0    | 43   | 0    | 0    | 0    | 0    | 0    | 0    | 0    |
| Mycoplasma                                    | 0    | 0    | 0    | 0    | 0    | 0    | 0    | 0    | 0    | 0    | 0    | 0    | 0    | 0    | 0    | 0    | 0    | 0    | 0    | 0    | 0    | 0    |
| Catenibacterium mitsuokai                     | 0    | 0    | 0    | 0    | 0    | 0    | 0    | 0    | 0    | 0    | 0    | 0    | 0    | 0    | 0    | 0    | 0    | 0    | 0    | 0    | 0    | 0    |
| Veillonella parvula                           | 0    | 0    | 0    | 0    | 0    | 0    | 0    | 0    | 0    | 86   | 0    | 0    | 0    | 0    | 0    | 0    | 0    | 0    | 0    | 0    | 0    | 0    |
| Corynebacterium kroppenstedtii                | 0    | 0    | 0    | 0    | 0    | 0    | 0    | 0    | 0    | 0    | 0    | 0    | 0    | 0    | 0    | 0    | 0    | 0    | 0    | 0    | 0    | 0    |
| Eremococcus coleocola                         | 0    | 0    | 0    | 0    | 0    | 0    | 0    | 0    | 0    | 0    | 0    | 0    | 0    | 0    | 0    | 0    | 0    | 0    | 0    | 0    | 0    | 0    |
| Actinomyces europaeus                         | 0    | 0    | 0    | 0    | 0    | 0    | 0    | 0    | 0    | 0    | 0    | 0    | 0    | 0    | 0    | 0    | 0    | 0    | 0    | 0    | 0    | 0    |
| Peptoniphilus senegalensis                    | 0    | 0    | 0    | 0    | 0    | 0    | 0    | 0    | 0    | 0    | 0    | 0    | 0    | 0    | 0    | 0    | 0    | 0    | 0    | 0    | 0    | 0    |
| Corynebacterium afermentans/humii             | 0    | 0    | 0    | 0    | 0    | 0    | 0    | 0    | 0    | 0    | 0    | 0    | 0    | 0    | 0    | 0    | 0    | 0    | 0    | 0    | 0    | 0    |
| Acinetobacter                                 | 0    | 0    | 0    | 0    | 0    | 0    | 0    | 0    | 0    | 0    | 0    | 0    | 0    | 0    | 0    | 0    | 0    | 0    | 0    | 0    | 0    | 0    |
| Eggerthellaceae                               | 0    | 0    | 0    | 0    | 0    | 0    | 0    | 0    | 0    | 0    | 0    | 0    | 0    | 0    | 0    | 0    | 0    | 0    | 0    | 0    | 0    | 0    |
| Corynebacterium mucifaciens                   | 0    | 0    | 0    | 0    | 0    | 0    | 0    | 0    | 0    | 0    | 0    | 0    | 0    | 0    | 0    | 0    | 0    | 0    | 0    | 0    | 0    | 0    |
| Filifactor                                    | 0    | 0    | 0    | 0    | 0    | 0    | 0    | 0    | 0    | 0    | 0    | 0    | 0    | 0    | 0    | 0    | 0    | 0    | 0    | 0    | 0    | 0    |
| Ruminococcus faecis                           | 0    | 0    | 0    | 0    | 0    | 0    | 0    | 0    | 0    | 0    | 0    | 0    | 0    | 0    | 0    | 0    | 0    | 0    | 0    | 0    | 0    | 0    |
| Lactobacillus                                 | 0    | 0    | 0    | 0    | 0    | 0    | 0    | 0    | 0    | 0    | 0    | 0    | 0    | 0    | 0    | 0    | 0    | 0    | 0    | 0    | 0    | 0    |
| Peptoniphilus grossensis/rhinitidis           | 0    | 0    | 0    | 0    | 0    | 0    | 0    | 0    | 0    | 0    | 0    | 0    | 0    | 0    | 0    | 0    | 0    | 0    | 0    | 0    | 0    | 0    |
| Aerococcus urinaequi/viridans                 | 0    | 0    | 0    | 0    | 0    | 0    | 0    | 0    | 0    | 0    | 0    | 0    | 0    | 0    | 0    | 0    | 0    | 0    | 0    | 0    | 0    | 0    |
| Anaerostipes hadrus                           | 0    | 0    | 0    | 0    | 0    | 0    | 0    | 0    | 0    | 0    | 0    | 0    | 0    | 0    | 0    | 0    | 0    | 0    | 0    | 0    | 0    | 0    |
| Lagierella                                    | 0    | 0    | 0    | 0    | 0    | 0    | 0    | 0    | 0    | 0    | 0    | 0    | 0    | 0    | 0    | 0    | 0    | 0    | 0    | 0    | 0    | 0    |
| Neisseria cinerea/meningitidis                | 0    | 0    | 0    | 0    | 0    | 0    | 0    | 0    | 0    | 0    | 0    | 0    | 0    | 0    | 0    | 0    | 0    | 0    | 0    | 0    | 0    | 0    |
| Micrococcus lylae                             | 0    | 0    | 0    | 0    | 0    | 0    | 0    | 0    | 0    | 0    | 0    | 0    | 0    | 0    | 0    | 0    | 0    | 0    | 0    | 0    | 0    | 0    |
| Staphylococcus cohnii                         | 0    | 0    | 0    | 0    | 0    | 0    | 0    | 0    | 0    | 0    | 0    | 0    | 0    | 0    | 0    | 0    | 0    | 0    | 0    | 0    | 0    | 0    |
| Casaltella massiliensis                       | 0    | 0    | 0    | 0    | 0    | 0    | 0    | 0    | 0    | 0    | 0    | 29   | 0    | 0    | 0    | 0    | 0    | 0    | 0    | 0    | 0    | 0    |
| Stomatobaculum longum                         | 0    | 0    | 0    | 0    | 0    | 0    | 0    | 0    | 0    | 41   | 0    | 0    | 0    | 0    | 0    | 0    | 0    | 0    | 0    | 0    | 0    | 0    |
| Lautropia                                     | 0    | 0    | 0    | 0    | 0    | 0    | 0    | 0    | 0    | 0    | 0    | 0    | 0    | 0    | 0    | 0    | 0    | 0    | 0    | 0    | 0    | 0    |
| Fastidiosipila                                | 0    | 0    | 0    | 0    | 0    | 0    | 0    | 0    | 0    | 0    | 0    | 0    | 0    | 0    | 0    | 0    | 0    | 0    | 0    | 0    | 0    | 0    |

Samples S313 - S349

| Species                                      | S313 | S316 | S318 | S319 | S320 | S321 | S322 | S323 | S325 | S327 | S328 | S333 | S335 | S336 | S337 | S340 | S342 | S343 | S344 | S345 | S346 | S349 |
|----------------------------------------------|------|------|------|------|------|------|------|------|------|------|------|------|------|------|------|------|------|------|------|------|------|------|
| Corynebacterium durum                        | 0    | 0    | 0    | 0    | 0    | 0    | 0    | 0    | 0    | 0    | 0    | 0    | 0    | 0    | 0    | 0    | 0    | 0    | 0    | 0    | 0    | 0    |
| Actinomyces graevenitzi                      | 0    | 0    | 0    | 0    | 0    | 0    | 0    | 0    | 0    | 0    | 0    | 0    | 0    | 0    | 0    | 0    | 0    | 0    | 0    | 0    | 0    | 0    |
| Staphylococcus cohnii/saprophyticus          | 0    | 0    | 0    | 0    | 0    | 0    | 0    | 0    | 0    | 0    | 0    | 0    | 0    | 0    | 0    | 0    | 0    | 0    | 0    | 0    | 0    | 0    |
| Leptotrichia trevisanii                      | 0    | 0    | 0    | 0    | 0    | 0    | 0    | 0    | 0    | 0    | 0    | 0    | 0    | 0    | 0    | 0    | 0    | 0    | 0    | 0    | 0    | 0    |
| Candidatus Paraburkholderia calva            | 0    | 0    | 0    | 0    | 0    | 0    | 0    | 0    | 0    | 0    | 0    | 0    | 0    | 0    | 0    | 0    | 0    | 0    | 0    | 0    | 0    | 0    |
| Actinomyces urogenitalis                     | 0    | 0    | 0    | 0    | 0    | 0    | 0    | 0    | 0    | 0    | 0    | 56   | 0    | 0    | 0    | 0    | 0    | 0    | 0    | 0    | 0    | 0    |
| Clostridiales                                | 0    | 0    | 0    | 0    | 0    | 0    | 0    | 0    | 0    | 0    | 51   | 0    | 0    | 0    | 0    | 0    | 0    | 0    | 0    | 0    | 0    | 0    |
| Pasteurella caballi                          | 0    | 0    | 0    | 0    | 0    | 0    | 0    | 0    | 0    | 0    | 0    | 0    | 0    | 0    | 0    | 0    | 0    | 0    | 0    | 0    | 0    | 140  |
| Fusobacterium hwasookii/nucleatum            | 0    | 0    | 0    | 0    | 0    | 0    | 0    | 0    | 96   | 0    | 0    | 0    | 0    | 0    | 0    | 0    | 0    | 0    | 0    | 0    | 0    | 0    |
| Corynebacterium riegelii                     | 0    | 0    | 0    | 0    | 0    | 0    | 0    | 0    | 0    | 0    | 0    | 0    | 0    | 0    | 0    | 0    | 0    | 0    | 0    | 0    | 0    | 0    |
| Hafnia                                       | 0    | 0    | 0    | 0    | 0    | 0    | 0    | 0    | 0    | 0    | 0    | 0    | 0    | 0    | 0    | 0    | 0    | 0    | 0    | 0    | 0    | 0    |
| Staphylococcus equorum/saprophyticus/xylosum | 0    | 0    | 0    | 0    | 0    | 0    | 0    | 0    | 0    | 0    | 0    | 0    | 0    | 0    | 0    | 0    | 0    | 0    | 0    | 0    | 0    | 0    |
| Acinetobacter lwoffii                        | 0    | 0    | 0    | 0    | 0    | 0    | 0    | 0    | 0    | 0    | 0    | 0    | 0    | 0    | 0    | 0    | 0    | 0    | 0    | 0    | 0    | 0    |
| Micrococcus cohnii                           | 0    | 0    | 0    | 0    | 0    | 0    | 0    | 0    | 0    | 0    | 0    | 0    | 0    | 0    | 0    | 0    | 0    | 0    | 0    | 0    | 0    | 0    |
| Pseudoclavibacter faecalis                   | 0    | 0    | 0    | 0    | 0    | 0    | 0    | 0    | 0    | 0    | 0    | 0    | 0    | 0    | 0    | 0    | 0    | 0    | 0    | 0    | 0    | 0    |
| Leptotrichia buccalis                        | 0    | 0    | 0    | 0    | 0    | 0    | 0    | 0    | 34   | 0    | 0    | 0    | 0    | 0    | 0    | 0    | 0    | 0    | 0    | 0    | 0    | 0    |
| Actinomyces                                  | 0    | 0    | 0    | 0    | 0    | 0    | 0    | 0    | 100  | 0    | 0    | 0    | 0    | 0    | 0    | 0    | 0    | 0    | 0    | 0    | 0    | 0    |
| Fusobacterium nucleatum/periodonticum        | 0    | 0    | 0    | 0    | 0    | 0    | 0    | 0    | 0    | 0    | 0    | 0    | 0    | 0    | 0    | 0    | 0    | 0    | 0    | 0    | 0    | 0    |
| Lactobacillus saerimneri                     | 0    | 0    | 0    | 0    | 0    | 0    | 0    | 0    | 0    | 0    | 0    | 0    | 0    | 0    | 0    | 0    | 0    | 0    | 0    | 0    | 0    | 0    |
| Actinomycetaceae                             | 0    | 0    | 0    | 0    | 0    | 0    | 0    | 0    | 0    | 0    | 0    | 0    | 0    | 0    | 0    | 0    | 0    | 0    | 0    | 0    | 0    | 0    |
| Dialister                                    | 0    | 0    | 0    | 0    | 0    | 0    | 0    | 0    | 0    | 0    | 0    | 0    | 0    | 0    | 0    | 0    | 0    | 0    | 0    | 0    | 0    | 0    |
| Neisseria mucosa/subflava                    | 0    | 0    | 0    | 0    | 0    | 0    | 0    | 0    | 0    | 0    | 0    | 0    | 0    | 0    | 0    | 0    | 0    | 0    | 0    | 0    | 0    | 0    |
| Paracoccus                                   | 0    | 0    | 0    | 0    | 0    | 0    | 0    | 0    | 0    | 0    | 0    | 0    | 0    | 0    | 0    | 0    | 0    | 0    | 0    | 0    | 0    | 0    |
| Acinetobacter haemolyticus/johnsonii         | 0    | 0    | 0    | 0    | 0    | 0    | 0    | 0    | 0    | 0    | 0    | 0    | 0    | 0    | 0    | 0    | 0    | 0    | 0    | 0    | 0    | 0    |
| Neisseria subflava                           | 0    | 0    | 0    | 0    | 0    | 0    | 0    | 0    | 0    | 0    | 0    | 0    | 0    | 0    | 0    | 0    | 0    | 0    | 0    | 0    | 0    | 0    |
| Acinetobacter proteolyticus                  | 0    | 0    | 0    | 0    | 0    | 0    | 0    | 0    | 0    | 0    | 0    | 0    | 0    | 0    | 0    | 0    | 0    | 0    | 0    | 0    | 0    | 0    |
| Dorea formicigenerans                        | 0    | 0    | 0    | 0    | 0    | 0    | 0    | 0    | 0    | 0    | 0    | 0    | 0    | 0    | 0    | 0    | 0    | 0    | 0    | 0    | 0    | 0    |
| Corynebacterium tuscaniense                  | 0    | 0    | 0    | 0    | 0    | 0    | 0    | 0    | 0    | 0    | 0    | 0    | 0    | 0    | 0    | 0    | 0    | 0    | 0    | 0    | 0    | 0    |
| Massiliomicrobiota timonensis                | 0    | 0    | 0    | 0    | 0    | 0    | 0    | 0    | 0    | 0    | 0    | 0    | 0    | 0    | 0    | 0    | 0    | 0    | 0    | 0    | 0    | 0    |
| Fusobacterium hwasookii                      | 0    | 0    | 0    | 0    | 0    | 0    | 0    | 0    | 0    | 0    | 0    | 0    | 0    | 0    | 0    | 0    | 0    | 0    | 0    | 0    | 0    | 0    |
| Pseudoglutamicibacter albus                  | 0    | 0    | 0    | 0    | 0    | 0    | 0    | 0    | 0    | 0    | 0    | 0    | 0    | 0    | 0    | 0    | 0    | 0    | 0    | 0    | 0    | 0    |
| Clostridiales Family XIII. Incertae Sedis    | 0    | 0    | 0    | 0    | 0    | 0    | 0    | 0    | 0    | 0    | 0    | 0    | 0    | 0    | 27   | 0    | 0    | 0    | 0    | 0    | 0    | 0    |
| Kocuria marina/rhizophila                    | 0    | 0    | 0    | 0    | 0    | 0    | 0    | 0    | 0    | 0    | 0    | 0    | 0    | 0    | 0    | 0    | 0    | 0    | 0    | 0    | 0    | 0    |
| Kocuria                                      | 0    | 0    | 0    | 0    | 0    | 0    | 0    | 0    | 0    | 0    | 0    | 0    | 0    | 0    | 0    | 0    | 0    | 0    | 0    | 0    | 0    | 0    |
| Alloprevotella rava                          | 0    | 0    | 0    | 0    | 0    | 0    | 0    | 0    | 0    | 0    | 0    | 0    | 0    | 0    | 0    | 0    | 0    | 0    | 0    | 0    | 0    | 0    |
| Staphylococcus pettenkoferi                  | 0    | 0    | 0    | 0    | 0    | 0    | 0    | 0    | 0    | 0    | 0    | 0    | 0    | 0    | 0    | 0    | 0    | 0    | 0    | 0    | 0    | 0    |
| Streptococcus pseudoporcinus                 | 0    | 0    | 0    | 0    | 0    | 0    | 0    | 0    | 0    | 0    | 0    | 0    | 0    | 0    | 0    | 0    | 0    | 0    | 0    | 0    | 0    | 0    |
| Kingella                                     | 0    | 0    | 0    | 0    | 0    | 0    | 0    | 0    | 46   | 0    | 0    | 0    | 0    | 0    | 0    | 0    | 0    | 0    | 0    | 0    | 0    | 0    |
| Eikenella                                    | 0    | 0    | 0    | 0    | 0    | 0    | 0    | 0    | 50   | 0    | 0    | 0    | 0    | 0    | 0    | 0    | 0    | 0    | 0    | 0    | 0    | 0    |
| Actinomyces odontolyticus                    | 0    | 0    | 0    | 0    | 0    | 0    | 0    | 0    | 0    | 0    | 0    | 0    | 0    | 0    | 0    | 0    | 0    | 0    | 0    | 0    | 0    | 0    |
| Corynebacterium sphenisci                    | 0    | 0    | 0    | 0    | 0    | 0    | 0    | 0    | 0    | 0    | 0    | 0    | 0    | 0    | 0    | 0    | 0    | 0    | 0    | 0    | 0    | 0    |
| Cutibacterium                                | 0    | 0    | 0    | 0    | 0    | 0    | 0    | 0    | 0    | 0    | 0    | 0    | 0    | 0    | 0    | 0    | 0    | 0    | 0    | 0    | 0    | 0    |
| Staphylococcus xylosum                       | 0    | 0    | 0    | 0    | 0    | 0    | 0    | 0    | 0    | 0    | 0    | 0    | 0    | 0    | 0    | 0    | 0    | 0    | 0    | 0    | 0    | 0    |
| Burkholderiales                              | 0    | 0    | 0    | 0    | 0    | 0    | 0    | 0    | 0    | 0    | 0    | 0    | 0    | 0    | 0    | 0    | 0    | 0    | 0    | 0    | 0    | 0    |
| Massiliomicrobiota/Mycoplasma                | 0    | 0    | 0    | 0    | 0    | 0    | 0    | 0    | 47   | 0    | 0    | 0    | 0    | 0    | 0    | 0    | 0    | 0    | 0    | 0    | 0    | 0    |
| Bacteroidales                                | 0    | 0    | 0    | 0    | 0    | 0    | 0    | 0    | 0    | 45   | 0    | 0    | 0    | 0    | 0    | 0    | 0    | 0    | 0    | 0    | 0    | 0    |
| Campylobacter fetus                          | 0    | 0    | 0    | 0    | 0    | 0    | 0    | 0    | 0    | 0    | 0    | 0    | 0    | 0    | 0    | 0    | 0    | 0    | 0    | 0    | 0    | 0    |
| Prevotella aurantiaca                        | 0    | 0    | 0    | 0    | 0    | 0    | 0    | 0    | 0    | 0    | 0    | 0    | 0    | 0    | 0    | 0    | 0    | 0    | 0    | 0    | 0    | 0    |
| Corynebacterium freneyi/xerosis              | 0    | 0    | 0    | 0    | 0    | 0    | 0    | 0    | 0    | 0    | 0    | 0    | 0    | 0    | 0    | 0    | 0    | 0    | 0    | 0    | 0    | 0    |
| Aerococcaceae                                | 0    | 0    | 0    | 0    | 0    | 0    | 0    | 0    | 0    | 0    | 0    | 0    | 0    | 0    | 0    | 0    | 0    | 0    | 0    | 0    | 0    | 0    |
| Moraxella lacunata                           | 0    | 0    | 0    | 0    | 0    | 0    | 0    | 0    | 0    | 0    | 0    | 0    | 0    | 0    | 0    | 0    | 0    | 0    | 0    | 0    | 0    | 0    |
| Corynebacterium accolens/macginleyi          | 0    | 0    | 0    | 0    | 0    | 0    | 0    | 0    | 39   | 0    | 0    | 0    | 0    | 0    | 0    | 0    | 0    | 0    | 0    | 0    | 0    | 0    |
| Massilia aurea                               | 0    | 0    | 0    | 0    | 0    | 0    | 0    | 0    | 0    | 0    | 0    | 0    | 0    | 0    | 0    | 0    | 0    | 0    | 0    | 0    | 0    | 0    |
| Corynebacterium casei                        | 0    | 0    | 0    | 0    | 0    | 0    | 0    | 0    | 0    | 0    | 0    | 0    | 0    | 0    | 0    | 0    | 0    | 0    | 0    | 0    | 0    | 0    |
| Helcococcus sueciensis                       | 0    | 0    | 0    | 0    | 0    | 0    | 0    | 0    | 0    | 0    | 0    | 0    | 0    | 0    | 0    | 0    | 0    | 0    | 0    | 0    | 0    | 0    |
| Lactobacillus casei/rhannosus                | 0    | 0    | 0    | 0    | 0    | 0    | 0    | 0    | 0    | 0    | 0    | 0    | 0    | 0    | 0    | 0    | 0    | 0    | 0    | 0    | 0    | 0    |
| Holdemanella biformis                        | 0    | 0    | 0    | 0    | 0    | 0    | 0    | 0    | 0    | 0    | 0    | 0    | 0    | 0    | 0    | 0    | 0    | 0    | 0    | 0    | 0    | 0    |
| Pelistega                                    | 0    | 0    | 0    | 0    | 0    | 0    | 0    | 0    | 0    | 0    | 0    | 0    | 0    | 0    | 0    | 0    | 0    | 0    | 0    | 0    | 0    | 32   |
| Actinomyces massiliensis                     | 0    | 0    | 0    | 0    | 0    | 0    | 0    | 0    | 0    | 0    | 0    | 0    | 0    | 0    | 0    | 0    | 0    | 0    | 0    | 0    | 0    | 0    |
| Massilia                                     | 0    | 0    | 0    | 0    | 0    | 0    | 0    | 0    | 0    | 0    | 0    | 0    | 0    | 0    | 0    | 0    | 0    | 0    | 0    | 0    | 0    | 0    |
| Staphylococcus equorum/xylosum               | 0    | 0    | 0    | 0    | 0    | 0    | 0    | 0    | 0    | 0    | 0    | 0    | 0    | 0    | 0    | 0    | 0    | 0    | 0    | 0    | 0    | 0    |
| Streptococcus                                | 0    | 0    | 0    | 0    | 0    | 0    | 0    | 0    | 0    | 0    | 0    | 0    | 0    | 0    | 0    | 0    | 0    | 0    | 0    | 0    | 0    | 0    |
| Cutibacterium avidum                         | 0    | 0    | 0    | 0    | 0    | 0    | 0    | 0    | 0    | 0    | 0    | 0    | 0    | 0    | 0    | 0    | 0    | 0    | 0    | 0    | 0    | 0    |

Samples S350 - S377

| Species                                            | S350 | S353 | S354 | S355  | S358  | S359  | S360 | S361  | S362 | S363 | S364  | S365 | S366 | S367 | S368  | S370  | S371 | S372 | S373 | S374 | S375 | S377  |
|----------------------------------------------------|------|------|------|-------|-------|-------|------|-------|------|------|-------|------|------|------|-------|-------|------|------|------|------|------|-------|
| Streptococcus mitis group                          | 4262 | 2267 | 1719 | 10058 | 12164 | 15389 | 7254 | 20002 | 1900 | 0    | 24584 | 1102 | 1140 | 6390 | 67    | 39783 | 4458 | 3814 | 4177 | 1437 | 7681 | 1565  |
| Lactobacillus iners                                | 0    | 0    | 0    | 0     | 0     | 0     | 0    | 0     | 0    | 0    | 0     | 0    | 0    | 0    | 0     | 0     | 0    | 0    | 0    | 0    | 0    | 0     |
| Gardnerella vaginalis                              | 0    | 0    | 0    | 0     | 0     | 22717 | 0    | 0     | 0    | 0    | 0     | 0    | 0    | 0    | 0     | 40139 | 1450 | 5144 | 0    | 0    | 0    | 0     |
| Corynebacterium pseudogenitalium/tuberculostrictum | 245  | 0    | 0    | 98    | 142   | 46    | 37   | 1587  | 0    | 0    | 53    | 0    | 673  | 30   | 354   | 123   | 44   | 0    | 147  | 208  | 184  | 304   |
| Streptococcus agalactiae                           | 0    | 0    | 0    | 1707  | 0     | 0     | 0    | 14233 | 0    | 0    | 0     | 0    | 0    | 0    | 12698 | 0     | 0    | 0    | 0    | 105  | 0    | 0     |
| Veillonella montpellierensis                       | 0    | 0    | 0    | 0     | 0     | 0     | 0    | 0     | 0    | 0    | 0     | 0    | 0    | 0    | 0     | 27149 | 0    | 0    | 0    | 0    | 0    | 0     |
| Streptococcus anginosus                            | 0    | 0    | 0    | 0     | 0     | 476   | 0    | 0     | 0    | 0    | 0     | 0    | 0    | 34   | 1133  | 0     | 528  | 33   | 0    | 1411 | 0    | 4859  |
| Chlamydia trachomatis                              | 0    | 0    | 0    | 0     | 0     | 0     | 0    | 0     | 0    | 0    | 0     | 0    | 0    | 0    | 0     | 2591  | 0    | 0    | 0    | 0    | 0    | 0     |
| Haemophilus parainfluenzae                         | 0    | 357  | 1221 | 0     | 0     | 3015  | 556  | 0     | 308  | 0    | 0     | 0    | 678  | 5978 | 0     | 0     | 0    | 0    | 2107 | 678  | 0    | 11438 |
| Finegoldia magna                                   | 59   | 0    | 0    | 0     | 0     | 889   | 330  | 116   | 435  | 0    | 0     | 0    | 36   | 277  | 0     | 0     | 151  | 247  | 0    | 984  | 0    | 1204  |
| Peptoniphilus asaccharolyticus/grossensis/harei    | 0    | 0    | 0    | 0     | 0     | 3037  | 89   | 0     | 616  | 0    | 0     | 456  | 755  | 352  | 0     | 0     | 219  | 439  | 0    | 353  | 0    | 1573  |
| Sneathia amnii                                     | 0    | 0    | 0    | 0     | 0     | 0     | 0    | 0     | 0    | 0    | 0     | 0    | 0    | 0    | 0     | 0     | 0    | 738  | 0    | 0    | 0    | 0     |
| Staphylococcus caprae/cohnii/epidermidis           | 58   | 0    | 34   | 45    | 613   | 0     | 0    | 1874  | 0    | 0    | 51    | 0    | 96   | 54   | 127   | 0     | 0    | 0    | 99   | 25   | 129  | 596   |
| Gemella haemolysans/taiwanensis                    | 688  | 156  | 1689 | 393   | 247   | 177   | 0    | 47    | 0    | 0    | 0     | 0    | 178  | 1064 | 0     | 0     | 635  | 0    | 0    | 0    | 0    | 56    |
| Sneathia sanguinigena                              | 0    | 0    | 0    | 0     | 0     | 0     | 0    | 0     | 0    | 0    | 0     | 0    | 0    | 0    | 0     | 0     | 0    | 0    | 0    | 0    | 0    | 0     |
| Mycoplasma genitalium                              | 0    | 0    | 0    | 290   | 0     | 0     | 0    | 0     | 0    | 4116 | 5668  | 0    | 0    | 0    | 0     | 0     | 0    | 0    | 0    | 0    | 0    | 0     |
| Mycoplasma penetrans                               | 0    | 0    | 0    | 0     | 0     | 0     | 0    | 0     | 0    | 0    | 0     | 0    | 0    | 0    | 0     | 0     | 0    | 0    | 0    | 0    | 0    | 0     |
| Haemophilus haemolyticus/quentini                  | 40   | 764  | 0    | 459   | 0     | 0     | 0    | 29    | 0    | 0    | 0     | 0    | 0    | 0    | 0     | 1517  | 0    | 0    | 0    | 0    | 0    | 93    |
| Corynebacterium pyruviciproducens                  | 0    | 0    | 0    | 0     | 0     | 427   | 0    | 0     | 0    | 0    | 0     | 0    | 0    | 0    | 0     | 0     | 0    | 224  | 0    | 0    | 0    | 49    |
| Anaerococcus prevotii/tetradius                    | 0    | 0    | 0    | 0     | 0     | 217   | 0    | 0     | 66   | 0    | 35    | 0    | 1248 | 627  | 0     | 0     | 0    | 0    | 0    | 126  | 0    | 50    |
| Haemophilus influenzae                             | 0    | 0    | 0    | 0     | 0     | 75    | 0    | 0     | 0    | 0    | 0     | 272  | 74   | 0    | 0     | 0     | 0    | 0    | 0    | 0    | 0    | 0     |
| Staphylococcus epidermidis/hominis                 | 47   | 0    | 85   | 33    | 0     | 0     | 0    | 620   | 0    | 0    | 63    | 0    | 152  | 0    | 376   | 0     | 0    | 0    | 0    | 92   | 118  | 226   |
| Atopobium vaginae                                  | 0    | 0    | 0    | 0     | 0     | 0     | 0    | 0     | 0    | 0    | 0     | 0    | 0    | 0    | 0     | 0     | 358  | 0    | 0    | 0    | 0    | 0     |
| Ureaplasma parvum/urealyticum                      | 461  | 0    | 0    | 0     | 0     | 1433  | 0    | 103   | 0    | 0    | 8761  | 0    | 0    | 0    | 256   | 0     | 0    | 0    | 0    | 0    | 0    | 0     |
| Prevotella timonensis                              | 0    | 0    | 0    | 0     | 0     | 1010  | 0    | 67    | 0    | 0    | 1920  | 101  | 0    | 0    | 0     | 0     | 244  | 0    | 0    | 0    | 0    | 0     |
| Fenollaria massiliensis/timonensis                 | 0    | 0    | 0    | 0     | 0     | 223   | 0    | 0     | 0    | 0    | 3029  | 0    | 0    | 0    | 0     | 0     | 936  | 0    | 0    | 0    | 0    | 0     |
| Anaerococcus                                       | 0    | 0    | 0    | 0     | 0     | 179   | 40   | 0     | 127  | 0    | 0     | 130  | 0    | 0    | 0     | 0     | 0    | 0    | 0    | 0    | 0    | 499   |
| Corynebacterium coyleae                            | 0    | 0    | 0    | 0     | 0     | 509   | 0    | 32    | 151  | 0    | 0     | 0    | 0    | 0    | 271   | 0     | 0    | 0    | 0    | 0    | 0    | 6202  |
| Prevotella bivia                                   | 0    | 0    | 0    | 0     | 0     | 307   | 304  | 0     | 0    | 0    | 0     | 0    | 0    | 0    | 0     | 0     | 46   | 0    | 62   | 0    | 0    | 1029  |
| Prevotella melaninogenica                          | 0    | 0    | 0    | 0     | 0     | 0     | 0    | 0     | 0    | 0    | 0     | 0    | 0    | 0    | 0     | 0     | 74   | 0    | 0    | 0    | 0    | 91    |
| Corynebacterium aurimucosum/minutissimum/singulare | 0    | 0    | 0    | 0     | 0     | 0     | 0    | 0     | 0    | 0    | 0     | 83   | 153  | 0    | 0     | 0     | 0    | 54   | 553  | 48   | 0    | 0     |
| Staphylococcus aureus                              | 0    | 0    | 0    | 0     | 0     | 0     | 0    | 32    | 0    | 0    | 0     | 0    | 0    | 0    | 0     | 0     | 0    | 0    | 0    | 0    | 0    | 0     |
| Anaerococcus lactolyticus                          | 0    | 0    | 0    | 0     | 0     | 756   | 0    | 0     | 0    | 0    | 44    | 0    | 0    | 0    | 0     | 0     | 994  | 0    | 0    | 0    | 0    | 0     |
| Aerococcus christensenii                           | 0    | 0    | 0    | 0     | 0     | 0     | 0    | 0     | 0    | 0    | 0     | 0    | 0    | 0    | 0     | 0     | 0    | 0    | 0    | 0    | 0    | 0     |
| Corynebacterium glucuronolyticum                   | 0    | 0    | 0    | 0     | 0     | 177   | 0    | 0     | 0    | 0    | 0     | 0    | 0    | 0    | 0     | 0     | 0    | 0    | 0    | 0    | 0    | 0     |
| Veillonella atypica                                | 0    | 106  | 0    | 0     | 0     | 0     | 0    | 0     | 0    | 0    | 0     | 0    | 0    | 0    | 0     | 0     | 112  | 0    | 43   | 0    | 0    | 6674  |
| Veillonella                                        | 0    | 0    | 1660 | 0     | 0     | 4579  | 0    | 0     | 0    | 0    | 0     | 0    | 0    | 0    | 0     | 0     | 0    | 0    | 0    | 0    | 0    | 0     |
| Mycoplasma hominis                                 | 0    | 0    | 0    | 0     | 0     | 0     | 0    | 0     | 0    | 0    | 0     | 0    | 0    | 0    | 0     | 0     | 0    | 0    | 0    | 0    | 769  | 0     |
| Granulicatella elegans                             | 109  | 533  | 0    | 0     | 0     | 324   | 0    | 0     | 0    | 0    | 0     | 0    | 0    | 0    | 0     | 0     | 0    | 0    | 0    | 0    | 0    | 0     |
| Ezakiella                                          | 0    | 0    | 0    | 0     | 0     | 71    | 0    | 0     | 0    | 0    | 0     | 446  | 25   | 0    | 0     | 0     | 244  | 0    | 0    | 0    | 0    | 0     |
| Shigella/Escherichia                               | 0    | 0    | 0    | 0     | 0     | 0     | 0    | 0     | 0    | 0    | 0     | 0    | 0    | 0    | 0     | 0     | 0    | 0    | 0    | 1557 | 0    | 0     |
| Streptococcus salivarius                           | 97   | 0    | 0    | 0     | 0     | 0     | 0    | 0     | 0    | 0    | 0     | 0    | 0    | 0    | 0     | 0     | 0    | 0    | 0    | 116  | 0    | 61    |
| Actinomyces turicensis                             | 0    | 0    | 0    | 0     | 0     | 141   | 0    | 0     | 252  | 0    | 0     | 0    | 72   | 65   | 0     | 0     | 95   | 0    | 0    | 0    | 0    | 0     |
| Prevotella corporis                                | 0    | 0    | 0    | 0     | 0     | 0     | 0    | 0     | 0    | 0    | 1457  | 0    | 0    | 0    | 0     | 0     | 0    | 0    | 0    | 0    | 0    | 0     |
| Corynebacterium simulans                           | 0    | 0    | 0    | 0     | 0     | 26    | 0    | 32    | 0    | 0    | 0     | 0    | 0    | 0    | 0     | 0     | 0    | 0    | 0    | 79   | 0    | 0     |
| Fusobacterium equinum                              | 0    | 0    | 0    | 0     | 0     | 0     | 0    | 0     | 0    | 0    | 0     | 0    | 0    | 0    | 0     | 0     | 0    | 0    | 0    | 0    | 0    | 0     |
| Corynebacterium                                    | 0    | 0    | 0    | 0     | 0     | 0     | 0    | 77    | 0    | 0    | 0     | 0    | 373  | 1364 | 0     | 0     | 0    | 0    | 0    | 0    | 0    | 0     |
| Staphylococcus haemolyticus                        | 0    | 44   | 74   | 0     | 27    | 0     | 0    | 0     | 0    | 0    | 0     | 0    | 0    | 0    | 0     | 91    | 88   | 0    | 0    | 0    | 0    | 166   |
| Gemella asaccharolytica                            | 0    | 0    | 0    | 0     | 0     | 354   | 0    | 0     | 0    | 0    | 0     | 0    | 0    | 0    | 0     | 0     | 208  | 0    | 0    | 0    | 0    | 0     |
| Peptoniphilus                                      | 0    | 0    | 0    | 0     | 0     | 624   | 0    | 0     | 83   | 0    | 0     | 1100 | 0    | 0    | 0     | 0     | 0    | 0    | 40   | 0    | 0    | 0     |
| Corynebacterium hadale/imitans                     | 0    | 0    | 0    | 0     | 0     | 0     | 0    | 0     | 0    | 0    | 0     | 0    | 48   | 0    | 0     | 0     | 0    | 0    | 0    | 0    | 0    | 0     |
| Eggerthella sp. type 1 (species)                   | 0    | 0    | 0    | 0     | 0     | 0     | 0    | 0     | 0    | 0    | 0     | 0    | 0    | 0    | 0     | 0     | 0    | 0    | 0    | 0    | 0    | 0     |
| Prevotella disiens                                 | 0    | 0    | 0    | 0     | 0     | 0     | 0    | 0     | 0    | 0    | 0     | 0    | 0    | 0    | 0     | 0     | 375  | 0    | 0    | 0    | 0    | 0     |
| Peptoniphilus lacrimalis                           | 0    | 0    | 0    | 0     | 0     | 46    | 0    | 0     | 0    | 0    | 0     | 773  | 0    | 0    | 0     | 0     | 506  | 0    | 0    | 0    | 0    | 0     |
| Anaerococcus vaginalis                             | 0    | 0    | 0    | 0     | 0     | 109   | 0    | 0     | 0    | 0    | 0     | 43   | 0    | 0    | 0     | 0     | 0    | 0    | 50   | 0    | 0    | 0     |
| Facklamia hominis                                  | 0    | 0    | 0    | 0     | 0     | 113   | 0    | 0     | 56   | 0    | 0     | 123  | 0    | 0    | 0     | 0     | 0    | 0    | 0    | 0    | 0    | 0     |
| Prevotella amnii                                   | 0    | 0    | 0    | 0     | 0     | 0     | 0    | 0     | 0    | 0    | 0     | 0    | 0    | 0    | 0     | 0     | 0    | 0    | 0    | 0    | 0    | 0     |
| Campylobacter ureolyticus                          | 0    | 0    | 0    | 0     | 0     | 88    | 0    | 0     | 0    | 0    | 0     | 273  | 68   | 0    | 0     | 0     | 280  | 0    | 0    | 0    | 0    | 364   |
| BVAB2 (species)                                    | 0    | 0    | 0    | 0     | 0     | 0     | 0    | 0     | 0    | 0    | 0     | 0    | 0    | 0    | 0     | 0     | 150  | 0    | 0    | 0    | 0    | 0     |
| Haemophilus                                        | 0    | 0    | 0    | 0     | 0     | 0     | 0    | 0     | 0    | 0    | 0     | 0    | 52   | 0    | 0     | 0     | 0    | 0    | 0    | 0    | 0    | 0     |
| Anaerococcus hydrogenalis/rubeifantais             | 0    | 0    | 0    | 0     | 0     | 0     | 0    | 25    | 0    | 0    | 0     | 0    | 0    | 0    | 0     | 0     | 0    | 0    | 33   | 0    | 0    | 0     |
| Anaerococcus mediterraneensis                      | 0    | 0    | 0    | 0     | 0     | 61    | 0    | 0     | 0    | 0    | 0     | 309  | 0    | 0    | 0     | 0     | 98   | 0    | 0    | 0    | 0    | 0     |
| Dialister sp. type 2                               | 0    | 0    | 0    | 0     | 0     | 0     | 0    | 0     | 0    | 0    | 0     | 744  | 0    | 0    | 0     | 0     | 700  | 0    | 0    | 0    | 0    | 0     |
| Dialister microaerophilus                          | 0    | 0    | 0    | 0     | 0     | 299   | 0    | 0     | 0    | 0    | 0     | 145  | 0    | 0    | 0     | 0     | 79   | 0    | 0    | 0    | 0    | 136   |
| Corynebacterium amycolatum                         | 0    | 0    | 0    | 0     | 0     | 0     | 0    | 0     | 0    | 0    | 0     | 0    | 0    | 0    | 0     | 0     | 0    | 0    | 0    | 0    | 0    | 0     |
| Ureaplasma                                         | 0    | 0    | 0    | 0     | 0     | 0     | 0    | 0     | 0    | 0    | 0     | 0    | 0    | 0    | 0     | 0     | 0    | 0    | 0    | 0    | 0    | 0     |
| Enterococcus faecalis                              | 0    | 0    | 0    | 0     | 0     | 0     | 230  | 0     | 0    | 0    | 0     | 0    | 0    | 0    | 50    | 0     | 0    | 0    | 417  | 0    | 0    | 0     |
| Parvimonas                                         | 0    | 0    | 0    | 0     | 0     | 51    | 0    | 0     | 0    | 0    | 0     | 205  | 0    | 0    | 0     | 0     | 0    | 0    | 0    | 0    | 0    | 0     |
| Haemophilus pittmaniae                             | 0    | 0    | 0    | 0     | 0     | 0     | 0    | 0     | 0    | 0    | 0     | 0    | 0    | 0    | 0     | 0     | 0    | 0    | 0    | 0    | 0    | 0     |
| Actinomyces neuii                                  | 0    | 0    | 0    | 0     | 0     | 0     | 0    | 0     | 0    | 0    | 0     | 0    | 0    | 0    | 0     | 0     | 0    | 0    | 0    | 0    | 0    | 79    |

Samples S350 - S377

| Species                                                | S350 | S353 | S354 | S355 | S358 | S359 | S360 | S361 | S362 | S363 | S364 | S365 | S366 | S367 | S368 | S370 | S371 | S372 | S373 | S374 | S375 | S377 |
|--------------------------------------------------------|------|------|------|------|------|------|------|------|------|------|------|------|------|------|------|------|------|------|------|------|------|------|
| Peptoniphilus rhintidis                                | 0    | 0    | 0    | 0    | 0    | 222  | 0    | 0    | 0    | 0    | 0    | 0    | 0    | 0    | 0    | 0    | 0    | 0    | 0    | 0    | 0    | 0    |
| Anaerococcus senegalensis                              | 27   | 0    | 0    | 0    | 0    | 0    | 0    | 0    | 0    | 0    | 0    | 0    | 0    | 0    | 0    | 0    | 0    | 0    | 0    | 0    | 0    | 25   |
| Peptostreptococcus anaerobius                          | 0    | 0    | 0    | 0    | 0    | 34   | 0    | 0    | 0    | 0    | 0    | 0    | 0    | 0    | 0    | 0    | 0    | 74   | 0    | 992  | 0    | 0    |
| Dialister propionificiens                              | 0    | 0    | 0    | 0    | 0    | 183  | 0    | 0    | 0    | 0    | 0    | 749  | 0    | 0    | 0    | 0    | 0    | 138  | 0    | 0    | 0    | 0    |
| Peptoniphilus harei                                    | 0    | 0    | 0    | 0    | 0    | 0    | 0    | 0    | 0    | 0    | 0    | 0    | 0    | 0    | 0    | 0    | 0    | 0    | 0    | 0    | 0    | 0    |
| Negativicoccus succinicivorans                         | 0    | 0    | 0    | 0    | 0    | 0    | 0    | 0    | 44   | 0    | 0    | 0    | 0    | 0    | 0    | 0    | 0    | 0    | 0    | 0    | 0    | 0    |
| Parvimonas micra                                       | 0    | 0    | 0    | 0    | 0    | 0    | 0    | 0    | 0    | 0    | 0    | 0    | 0    | 0    | 0    | 0    | 0    | 45   | 0    | 0    | 0    | 0    |
| Actinomyces ihumii                                     | 0    | 0    | 0    | 0    | 0    | 25   | 0    | 0    | 0    | 0    | 0    | 0    | 0    | 0    | 0    | 0    | 0    | 49   | 0    | 0    | 0    | 29   |
| Actinotignum timonense                                 | 0    | 0    | 0    | 0    | 0    | 129  | 0    | 0    | 0    | 0    | 0    | 0    | 0    | 0    | 0    | 0    | 0    | 0    | 0    | 0    | 0    | 64   |
| Fenollaria                                             | 0    | 0    | 0    | 0    | 0    | 0    | 0    | 0    | 0    | 0    | 0    | 390  | 0    | 0    | 0    | 0    | 0    | 1030 | 0    | 0    | 0    | 0    |
| Fusobacterium massiliense                              | 0    | 0    | 0    | 0    | 0    | 0    | 0    | 0    | 0    | 0    | 0    | 0    | 0    | 0    | 0    | 0    | 0    | 0    | 0    | 0    | 0    | 0    |
| Actinobaculum massiliense                              | 0    | 0    | 0    | 0    | 0    | 0    | 0    | 0    | 0    | 0    | 0    | 0    | 0    | 0    | 0    | 0    | 0    | 0    | 0    | 0    | 0    | 0    |
| Peptoniphilus coxii                                    | 0    | 0    | 0    | 0    | 0    | 25   | 0    | 0    | 0    | 0    | 0    | 78   | 0    | 0    | 0    | 0    | 0    | 38   | 0    | 0    | 0    | 0    |
| Staphylococcus lugdunensis                             | 0    | 0    | 0    | 0    | 0    | 0    | 0    | 253  | 0    | 0    | 0    | 0    | 0    | 0    | 0    | 0    | 0    | 0    | 0    | 0    | 0    | 0    |
| Dermabacter                                            | 0    | 0    | 0    | 0    | 0    | 0    | 0    | 0    | 0    | 0    | 0    | 0    | 0    | 0    | 0    | 0    | 0    | 0    | 0    | 0    | 0    | 0    |
| Alloscardovia omnicolens                               | 0    | 0    | 0    | 0    | 0    | 60   | 0    | 0    | 0    | 0    | 0    | 0    | 0    | 0    | 0    | 0    | 0    | 0    | 0    | 0    | 0    | 0    |
| Varibaculum cambriense                                 | 0    | 0    | 0    | 0    | 0    | 0    | 0    | 0    | 0    | 0    | 0    | 0    | 0    | 0    | 0    | 0    | 0    | 81   | 0    | 0    | 0    | 86   |
| Streptococcus urinalis                                 | 0    | 0    | 0    | 0    | 0    | 0    | 0    | 0    | 0    | 0    | 0    | 0    | 0    | 0    | 161  | 0    | 0    | 0    | 0    | 731  | 0    | 0    |
| Corynebacterium appendicis                             | 0    | 0    | 0    | 0    | 0    | 0    | 0    | 0    | 0    | 0    | 0    | 0    | 0    | 0    | 0    | 0    | 0    | 0    | 0    | 0    | 0    | 0    |
| Actinotignum schaalii                                  | 0    | 0    | 0    | 0    | 0    | 574  | 0    | 0    | 53   | 0    | 0    | 0    | 0    | 0    | 0    | 0    | 0    | 0    | 0    | 0    | 0    | 243  |
| Corynebacterium timonense                              | 0    | 0    | 0    | 0    | 0    | 0    | 0    | 0    | 0    | 0    | 0    | 0    | 0    | 0    | 0    | 0    | 0    | 0    | 0    | 0    | 0    | 0    |
| Gemella                                                | 0    | 0    | 0    | 0    | 0    | 0    | 0    | 33   | 0    | 0    | 0    | 0    | 0    | 0    | 0    | 0    | 0    | 0    | 0    | 0    | 0    | 0    |
| Klebsiella aerogenes/Enterobacter asburiae             | 0    | 0    | 0    | 0    | 0    | 0    | 0    | 0    | 0    | 0    | 0    | 0    | 0    | 0    | 0    | 0    | 0    | 0    | 0    | 0    | 0    | 0    |
| Fusobacterium periodonticum                            | 0    | 0    | 0    | 0    | 0    | 0    | 0    | 0    | 0    | 0    | 0    | 0    | 0    | 0    | 0    | 0    | 0    | 0    | 0    | 0    | 0    | 0    |
| Veillonella dispar                                     | 0    | 0    | 0    | 0    | 0    | 0    | 0    | 0    | 0    | 0    | 0    | 0    | 0    | 0    | 0    | 0    | 0    | 0    | 0    | 0    | 0    | 1671 |
| Prevotella colorans                                    | 0    | 0    | 0    | 0    | 0    | 0    | 0    | 0    | 0    | 0    | 0    | 791  | 0    | 0    | 0    | 0    | 0    | 536  | 0    | 0    | 0    | 0    |
| Candidatus Peptoniphilus massiliensis                  | 0    | 0    | 0    | 0    | 0    | 0    | 0    | 0    | 0    | 0    | 0    | 32   | 0    | 0    | 0    | 0    | 0    | 60   | 0    | 0    | 0    | 0    |
| Eremococcus                                            | 0    | 0    | 0    | 0    | 0    | 0    | 0    | 0    | 0    | 0    | 0    | 0    | 26   | 0    | 0    | 0    | 0    | 0    | 0    | 0    | 0    | 0    |
| Varibaculum anthropi                                   | 0    | 0    | 0    | 0    | 0    | 0    | 0    | 0    | 0    | 0    | 0    | 0    | 0    | 0    | 0    | 0    | 0    | 0    | 0    | 0    | 0    | 0    |
| Propionimicrobium lymphophilum                         | 0    | 0    | 0    | 0    | 0    | 244  | 0    | 0    | 0    | 0    | 0    | 0    | 0    | 0    | 0    | 0    | 0    | 71   | 0    | 0    | 0    | 32   |
| Streptococcus dysgalactiae                             | 0    | 0    | 0    | 0    | 0    | 0    | 0    | 0    | 0    | 0    | 0    | 0    | 0    | 0    | 0    | 0    | 0    | 0    | 0    | 0    | 0    | 0    |
| Negativicoccus                                         | 0    | 0    | 0    | 0    | 0    | 51   | 0    | 0    | 0    | 0    | 0    | 0    | 0    | 0    | 0    | 0    | 0    | 0    | 0    | 0    | 0    | 0    |
| Porphyromonas somerae                                  | 0    | 0    | 0    | 0    | 0    | 0    | 0    | 0    | 34   | 0    | 0    | 0    | 87   | 0    | 0    | 0    | 0    | 0    | 0    | 0    | 0    | 0    |
| Corynebacterium jeikeium                               | 0    | 0    | 0    | 0    | 0    | 0    | 0    | 0    | 0    | 0    | 0    | 0    | 0    | 0    | 0    | 0    | 0    | 0    | 0    | 0    | 0    | 0    |
| Mobiluncus curtisii                                    | 0    | 0    | 0    | 0    | 0    | 100  | 0    | 0    | 0    | 0    | 0    | 168  | 0    | 0    | 0    | 0    | 0    | 166  | 0    | 0    | 0    | 0    |
| Porphyromonas uenonis                                  | 0    | 0    | 0    | 0    | 0    | 31   | 0    | 0    | 0    | 0    | 0    | 272  | 0    | 0    | 0    | 0    | 0    | 291  | 0    | 0    | 0    | 0    |
| Aerococcus urinae                                      | 0    | 0    | 0    | 0    | 0    | 167  | 0    | 0    | 0    | 0    | 0    | 0    | 0    | 0    | 109  | 0    | 0    | 0    | 0    | 0    | 0    | 819  |
| Corynebacterium mycetoides                             | 0    | 0    | 0    | 0    | 0    | 0    | 0    | 0    | 0    | 0    | 0    | 0    | 0    | 0    | 0    | 0    | 0    | 0    | 0    | 0    | 0    | 0    |
| Cutibacterium acnes                                    | 0    | 0    | 0    | 0    | 0    | 0    | 0    | 0    | 0    | 0    | 0    | 0    | 0    | 0    | 0    | 0    | 0    | 0    | 0    | 0    | 0    | 0    |
| Urinacoccus massiliensis                               | 0    | 0    | 0    | 0    | 0    | 51   | 0    | 0    | 0    | 0    | 0    | 196  | 87   | 0    | 0    | 0    | 0    | 0    | 0    | 0    | 0    | 0    |
| Campylobacter hominis                                  | 0    | 0    | 0    | 0    | 0    | 0    | 0    | 0    | 0    | 0    | 0    | 934  | 0    | 0    | 0    | 0    | 0    | 0    | 0    | 0    | 0    | 0    |
| Staphylococcus capitis/caprae                          | 0    | 0    | 0    | 0    | 0    | 0    | 0    | 328  | 0    | 0    | 0    | 0    | 0    | 0    | 0    | 75   | 0    | 0    | 0    | 0    | 0    | 0    |
| Sneathia                                               | 0    | 0    | 0    | 0    | 0    | 0    | 0    | 0    | 0    | 0    | 0    | 0    | 0    | 0    | 0    | 0    | 0    | 0    | 0    | 0    | 0    | 0    |
| Prevotella jejuni                                      | 0    | 0    | 0    | 0    | 0    | 0    | 0    | 0    | 0    | 0    | 0    | 0    | 0    | 0    | 0    | 0    | 0    | 0    | 0    | 0    | 0    | 0    |
| Varibaculum                                            | 0    | 0    | 0    | 0    | 0    | 50   | 0    | 0    | 0    | 0    | 0    | 881  | 0    | 0    | 0    | 0    | 0    | 0    | 0    | 0    | 0    | 51   |
| Corynebacterium striatum                               | 0    | 0    | 0    | 0    | 0    | 0    | 0    | 0    | 0    | 0    | 0    | 0    | 0    | 0    | 0    | 0    | 0    | 0    | 0    | 0    | 0    | 0    |
| Jonquetella anthropi                                   | 0    | 0    | 0    | 0    | 0    | 0    | 0    | 0    | 0    | 0    | 0    | 32   | 0    | 0    | 0    | 0    | 0    | 0    | 0    | 0    | 0    | 0    |
| Peptoniphilus koeoeneriae                              | 0    | 0    | 0    | 0    | 0    | 33   | 0    | 0    | 0    | 0    | 0    | 54   | 0    | 0    | 0    | 0    | 0    | 0    | 0    | 0    | 0    | 0    |
| Bifidobacterium longum                                 | 0    | 0    | 0    | 0    | 0    | 0    | 0    | 0    | 0    | 0    | 0    | 0    | 0    | 0    | 0    | 0    | 0    | 0    | 0    | 0    | 0    | 0    |
| Helicobacter                                           | 0    | 0    | 0    | 0    | 0    | 0    | 0    | 0    | 0    | 0    | 0    | 0    | 0    | 0    | 0    | 0    | 0    | 0    | 0    | 0    | 0    | 0    |
| Lawsonella clevelandensis                              | 0    | 0    | 0    | 0    | 0    | 0    | 0    | 0    | 0    | 0    | 0    | 0    | 0    | 0    | 0    | 0    | 0    | 0    | 0    | 0    | 0    | 0    |
| Escherichia coli/fergusonii                            | 0    | 0    | 0    | 0    | 0    | 0    | 0    | 0    | 0    | 0    | 0    | 0    | 0    | 0    | 0    | 0    | 0    | 0    | 0    | 0    | 0    | 0    |
| Fusobacterium nucleatum                                | 0    | 0    | 0    | 0    | 0    | 26   | 0    | 0    | 0    | 0    | 0    | 0    | 0    | 0    | 0    | 0    | 0    | 492  | 0    | 0    | 0    | 0    |
| Porphyromonas asaccharolytica                          | 0    | 0    | 0    | 0    | 0    | 0    | 0    | 0    | 0    | 0    | 0    | 104  | 0    | 0    | 0    | 0    | 0    | 0    | 0    | 0    | 0    | 0    |
| Anaerococcus octavius                                  | 0    | 0    | 0    | 0    | 0    | 0    | 0    | 0    | 0    | 0    | 0    | 0    | 0    | 0    | 0    | 0    | 0    | 0    | 0    | 0    | 0    | 0    |
| Fusobacterium                                          | 0    | 0    | 0    | 0    | 0    | 0    | 0    | 0    | 0    | 0    | 0    | 0    | 0    | 0    | 0    | 0    | 0    | 0    | 0    | 0    | 0    | 0    |
| Corynebacterium phoceense                              | 0    | 0    | 0    | 0    | 0    | 0    | 0    | 0    | 0    | 0    | 0    | 0    | 0    | 0    | 0    | 0    | 0    | 0    | 0    | 0    | 0    | 0    |
| Ruminococcus                                           | 0    | 0    | 0    | 0    | 0    | 0    | 0    | 0    | 0    | 0    | 0    | 0    | 0    | 0    | 0    | 0    | 0    | 0    | 0    | 0    | 0    | 0    |
| Arcanobacterium                                        | 0    | 0    | 0    | 0    | 0    | 0    | 0    | 0    | 0    | 0    | 0    | 164  | 0    | 0    | 0    | 0    | 0    | 0    | 0    | 0    | 0    | 0    |
| Khoudiadiopia                                          | 0    | 0    | 0    | 0    | 0    | 0    | 0    | 0    | 0    | 0    | 0    | 49   | 0    | 0    | 0    | 0    | 0    | 0    | 0    | 0    | 0    | 0    |
| Atopobium deltae                                       | 0    | 0    | 0    | 0    | 0    | 0    | 0    | 0    | 0    | 0    | 0    | 76   | 0    | 0    | 0    | 0    | 0    | 0    | 0    | 0    | 0    | 0    |
| Haemophilus paraaerolyticus                            | 4679 | 0    | 0    | 0    | 0    | 0    | 0    | 0    | 0    | 0    | 0    | 0    | 0    | 0    | 0    | 0    | 0    | 0    | 0    | 0    | 0    | 0    |
| Howardella                                             | 0    | 0    | 0    | 0    | 0    | 0    | 0    | 0    | 0    | 0    | 0    | 0    | 0    | 0    | 0    | 0    | 0    | 31   | 0    | 0    | 0    | 0    |
| Prevotella buccalis                                    | 0    | 0    | 0    | 0    | 0    | 81   | 0    | 0    | 0    | 0    | 0    | 162  | 0    | 0    | 0    | 0    | 0    | 89   | 0    | 0    | 0    | 0    |
| Corynebacterium auris                                  | 0    | 0    | 0    | 0    | 0    | 0    | 0    | 0    | 0    | 0    | 0    | 0    | 0    | 0    | 0    | 0    | 0    | 0    | 0    | 0    | 0    | 0    |
| Candidatus Mycoplasma gireddii                         | 0    | 0    | 0    | 0    | 0    | 0    | 0    | 0    | 0    | 0    | 0    | 0    | 0    | 0    | 0    | 0    | 0    | 0    | 0    | 0    | 0    | 0    |
| Alloicoccus                                            | 0    | 0    | 0    | 0    | 0    | 0    | 0    | 0    | 0    | 0    | 0    | 0    | 0    | 0    | 0    | 0    | 0    | 0    | 0    | 0    | 0    | 0    |
| Corynebacterium founierii/mucifaciens/ureicelerivorans | 0    | 0    | 0    | 0    | 0    | 0    | 0    | 0    | 0    | 0    | 0    | 0    | 0    | 0    | 0    | 0    | 0    | 0    | 0    | 0    | 0    | 0    |
| Corynebacterium auris/timonense                        | 0    | 0    | 0    | 0    | 0    | 0    | 0    | 0    | 0    | 0    | 0    | 0    | 0    | 0    | 0    | 0    | 0    | 0    | 0    | 0    | 0    | 0    |
| Veillonella ratti/seminalis                            | 0    | 0    | 0    | 0    | 0    | 0    | 0    | 0    | 0    | 0    | 0    | 0    | 0    | 0    | 0    | 0    | 0    | 0    | 0    | 0    | 0    | 0    |

# Samples S350 - S377

| Species                                    | S350 | S353 | S354 | S355 | S358 | S359 | S360 | S361 | S362 | S363 | S364 | S365 | S366 | S367 | S368 | S370 | S371 | S372 | S373 | S374 | S375 | S377 |
|--------------------------------------------|------|------|------|------|------|------|------|------|------|------|------|------|------|------|------|------|------|------|------|------|------|------|
| Lactobacillus gasserii                     | 0    | 0    | 0    | 0    | 0    | 0    | 0    | 0    | 0    | 0    | 0    | 0    | 0    | 0    | 3073 | 0    | 0    | 0    | 0    | 0    | 0    | 0    |
| Tissierella                                | 0    | 0    | 0    | 0    | 0    | 0    | 0    | 0    | 0    | 0    | 0    | 168  | 0    | 0    | 0    | 0    | 0    | 0    | 0    | 0    | 0    | 0    |
| Granulicatella adiacens                    | 0    | 0    | 0    | 0    | 0    | 0    | 0    | 0    | 0    | 0    | 0    | 0    | 0    | 0    | 0    | 0    | 0    | 0    | 0    | 0    | 0    | 53   |
| Sutterella                                 | 0    | 0    | 0    | 0    | 0    | 0    | 0    | 0    | 0    | 0    | 0    | 0    | 0    | 0    | 0    | 0    | 0    | 0    | 0    | 0    | 0    | 0    |
| Prevotella nanceiensis                     | 0    | 0    | 0    | 0    | 0    | 0    | 0    | 0    | 0    | 0    | 0    | 0    | 0    | 0    | 0    | 0    | 0    | 0    | 0    | 0    | 0    | 0    |
| Lactobacillus jensenii                     | 0    | 0    | 0    | 0    | 0    | 0    | 0    | 0    | 0    | 0    | 0    | 0    | 0    | 0    | 0    | 0    | 0    | 0    | 0    | 0    | 0    | 0    |
| Lactobacillus crispatus                    | 0    | 0    | 0    | 0    | 0    | 0    | 0    | 0    | 0    | 0    | 0    | 0    | 0    | 0    | 0    | 0    | 0    | 0    | 0    | 0    | 0    | 0    |
| Candidate Division TM7 vaginal (genus)     | 0    | 0    | 0    | 0    | 0    | 0    | 0    | 0    | 0    | 0    | 0    | 0    | 0    | 0    | 0    | 0    | 0    | 0    | 0    | 0    | 0    | 0    |
| Candidatus Saccharimonas                   | 0    | 0    | 0    | 0    | 0    | 0    | 0    | 0    | 0    | 0    | 0    | 0    | 0    | 0    | 0    | 0    | 0    | 0    | 0    | 0    | 0    | 0    |
| Peptococcus niger                          | 0    | 0    | 0    | 0    | 0    | 32   | 0    | 0    | 0    | 0    | 0    | 0    | 0    | 0    | 0    | 0    | 0    | 0    | 0    | 0    | 0    | 0    |
| Neisseria flavescens/perflava              | 0    | 0    | 0    | 0    | 0    | 0    | 0    | 0    | 0    | 0    | 0    | 0    | 0    | 0    | 0    | 0    | 0    | 0    | 0    | 0    | 0    | 0    |
| Gemella sanguinis                          | 0    | 0    | 0    | 0    | 0    | 0    | 0    | 0    | 0    | 0    | 0    | 0    | 0    | 0    | 0    | 0    | 0    | 0    | 0    | 0    | 0    | 0    |
| Porphyromonas                              | 0    | 930  | 0    | 0    | 0    | 0    | 0    | 0    | 0    | 0    | 0    | 594  | 0    | 0    | 0    | 0    | 0    | 0    | 0    | 0    | 0    | 0    |
| Prevotella                                 | 0    | 0    | 0    | 0    | 0    | 0    | 0    | 0    | 0    | 0    | 0    | 0    | 0    | 0    | 0    | 0    | 0    | 0    | 0    | 0    | 0    | 0    |
| Corynebacterium thomssenii                 | 0    | 0    | 0    | 0    | 0    | 0    | 0    | 0    | 0    | 0    | 0    | 0    | 0    | 0    | 0    | 0    | 0    | 0    | 0    | 0    | 0    | 0    |
| Lachnospiraceae                            | 0    | 0    | 0    | 0    | 0    | 0    | 0    | 0    | 0    | 0    | 0    | 185  | 0    | 0    | 0    | 0    | 0    | 0    | 0    | 0    | 0    | 0    |
| Corynebacterium tuberculoostearicum        | 0    | 0    | 0    | 0    | 0    | 0    | 0    | 0    | 0    | 0    | 0    | 0    | 0    | 0    | 0    | 0    | 0    | 0    | 0    | 0    | 0    | 2089 |
| Dermabacter hominis                        | 0    | 0    | 0    | 0    | 0    | 0    | 0    | 0    | 0    | 0    | 0    | 0    | 0    | 0    | 0    | 0    | 0    | 0    | 0    | 38   | 0    | 0    |
| Veillonella rogosae                        | 0    | 0    | 0    | 0    | 0    | 0    | 0    | 0    | 0    | 0    | 0    | 0    | 0    | 0    | 0    | 0    | 0    | 0    | 0    | 0    | 0    | 173  |
| Actinomyces hongkongensis                  | 0    | 0    | 0    | 0    | 0    | 0    | 0    | 0    | 0    | 0    | 0    | 0    | 0    | 0    | 0    | 0    | 0    | 0    | 0    | 0    | 0    | 0    |
| Veillonella parvula/rogosae                | 0    | 0    | 0    | 0    | 0    | 0    | 0    | 0    | 0    | 0    | 0    | 0    | 0    | 0    | 0    | 0    | 0    | 0    | 0    | 0    | 0    | 0    |
| Anaerococcus provencensis                  | 0    | 0    | 0    | 0    | 0    | 0    | 0    | 0    | 0    | 0    | 0    | 0    | 0    | 0    | 0    | 0    | 0    | 0    | 0    | 0    | 0    | 0    |
| Porphyromonas sp. type 1                   | 0    | 0    | 0    | 0    | 0    | 0    | 0    | 0    | 0    | 0    | 0    | 29   | 0    | 0    | 0    | 0    | 0    | 0    | 0    | 0    | 0    | 0    |
| Brevibacterium paucivorans                 | 0    | 0    | 0    | 0    | 0    | 0    | 0    | 0    | 0    | 0    | 0    | 0    | 0    | 0    | 0    | 0    | 0    | 0    | 0    | 0    | 0    | 0    |
| Peptostreptococcus                         | 0    | 0    | 0    | 0    | 0    | 0    | 0    | 0    | 0    | 0    | 0    | 0    | 0    | 0    | 0    | 0    | 0    | 0    | 0    | 0    | 0    | 0    |
| Facklamia languida                         | 0    | 0    | 0    | 0    | 0    | 0    | 0    | 0    | 0    | 0    | 0    | 0    | 0    | 0    | 0    | 0    | 0    | 0    | 0    | 0    | 0    | 0    |
| Streptobacillus                            | 0    | 0    | 0    | 0    | 0    | 0    | 0    | 0    | 0    | 0    | 0    | 0    | 0    | 0    | 0    | 0    | 0    | 0    | 0    | 0    | 0    | 0    |
| Gemella haemolysans                        | 0    | 0    | 0    | 0    | 0    | 0    | 0    | 0    | 0    | 0    | 0    | 0    | 0    | 0    | 0    | 0    | 0    | 0    | 0    | 0    | 0    | 0    |
| Haemophilus sputorum                       | 0    | 0    | 0    | 0    | 0    | 0    | 0    | 0    | 0    | 0    | 0    | 0    | 0    | 0    | 0    | 0    | 0    | 0    | 0    | 0    | 0    | 0    |
| Actinotignum urinale                       | 0    | 0    | 0    | 0    | 0    | 0    | 0    | 0    | 0    | 0    | 0    | 733  | 0    | 0    | 0    | 0    | 0    | 0    | 0    | 0    | 0    | 0    |
| Dialister pneumosintes                     | 0    | 0    | 0    | 0    | 0    | 0    | 0    | 0    | 0    | 0    | 0    | 0    | 0    | 0    | 0    | 0    | 0    | 0    | 0    | 0    | 0    | 0    |
| Treponema pallidum                         | 0    | 0    | 0    | 0    | 0    | 0    | 0    | 0    | 0    | 0    | 0    | 0    | 0    | 0    | 0    | 0    | 0    | 0    | 0    | 0    | 0    | 0    |
| Porphyromonas bennonis                     | 0    | 0    | 0    | 0    | 0    | 68   | 0    | 0    | 0    | 0    | 0    | 175  | 0    | 0    | 0    | 0    | 0    | 0    | 0    | 0    | 0    | 0    |
| Bergeyella                                 | 0    | 38   | 45   | 235  | 0    | 0    | 0    | 0    | 0    | 0    | 0    | 0    | 0    | 0    | 0    | 0    | 0    | 0    | 0    | 0    | 0    | 31   |
| Actinotignum schaalii/timonense            | 0    | 0    | 0    | 0    | 0    | 0    | 0    | 0    | 45   | 0    | 0    | 0    | 0    | 0    | 0    | 0    | 0    | 0    | 0    | 0    | 0    | 143  |
| Klebsiella aerogenes/Kluyvera cryocrescens | 0    | 0    | 0    | 0    | 0    | 0    | 0    | 0    | 0    | 0    | 0    | 0    | 0    | 0    | 0    | 0    | 0    | 0    | 0    | 0    | 0    | 0    |
| Rothia mucilaginosus                       | 140  | 0    | 0    | 0    | 0    | 0    | 0    | 0    | 0    | 0    | 0    | 0    | 0    | 0    | 0    | 0    | 0    | 0    | 0    | 0    | 0    | 0    |
| Solobacterium moorei                       | 0    | 0    | 0    | 0    | 0    | 0    | 0    | 0    | 0    | 0    | 0    | 0    | 0    | 0    | 0    | 0    | 0    | 0    | 0    | 0    | 0    | 0    |
| Mageibacillus indolicus                    | 0    | 0    | 0    | 0    | 0    | 0    | 0    | 0    | 0    | 0    | 0    | 0    | 0    | 0    | 0    | 0    | 0    | 0    | 0    | 0    | 0    | 0    |
| Serratia urelytica                         | 0    | 0    | 0    | 0    | 0    | 0    | 0    | 0    | 0    | 0    | 0    | 0    | 0    | 0    | 0    | 0    | 0    | 0    | 0    | 0    | 0    | 0    |
| Peptoniphilus obesi                        | 0    | 0    | 0    | 0    | 0    | 0    | 0    | 0    | 0    | 0    | 0    | 0    | 0    | 0    | 0    | 0    | 0    | 0    | 0    | 0    | 0    | 0    |
| Peptoniphilus harei/phoceensis             | 0    | 0    | 0    | 0    | 0    | 0    | 0    | 0    | 0    | 0    | 0    | 0    | 0    | 0    | 0    | 0    | 0    | 0    | 0    | 0    | 0    | 0    |
| Corynebacterium atypicum                   | 0    | 0    | 0    | 0    | 0    | 0    | 0    | 0    | 0    | 0    | 0    | 156  | 0    | 0    | 0    | 0    | 0    | 0    | 0    | 41   | 0    | 0    |
| Atopobium minutum                          | 0    | 0    | 0    | 0    | 0    | 0    | 0    | 0    | 0    | 0    | 0    | 0    | 0    | 0    | 0    | 0    | 0    | 0    | 0    | 0    | 0    | 0    |
| Corynebacterium genitalium                 | 0    | 0    | 0    | 0    | 0    | 0    | 0    | 0    | 0    | 0    | 0    | 0    | 0    | 0    | 0    | 0    | 0    | 0    | 0    | 0    | 0    | 0    |
| Bifidobacterium tsurumiense                | 0    | 0    | 0    | 0    | 0    | 0    | 0    | 0    | 0    | 0    | 0    | 0    | 0    | 0    | 0    | 0    | 0    | 0    | 0    | 0    | 0    | 0    |
| Micrococcus                                | 0    | 0    | 0    | 0    | 0    | 0    | 0    | 0    | 0    | 0    | 0    | 0    | 0    | 0    | 0    | 0    | 0    | 0    | 0    | 0    | 0    | 0    |
| Megasphaera genomsp. type_1                | 0    | 0    | 0    | 0    | 0    | 0    | 0    | 0    | 0    | 0    | 0    | 0    | 0    | 0    | 0    | 0    | 0    | 0    | 0    | 0    | 0    | 0    |
| Enhydrobacter                              | 0    | 0    | 0    | 0    | 0    | 0    | 0    | 0    | 0    | 0    | 0    | 0    | 0    | 0    | 0    | 0    | 0    | 0    | 0    | 0    | 0    | 0    |
| Fastidiosipila sanguinis                   | 0    | 0    | 0    | 0    | 0    | 0    | 0    | 0    | 0    | 0    | 0    | 0    | 0    | 0    | 0    | 0    | 0    | 0    | 0    | 0    | 0    | 0    |
| Prevotellamassilia                         | 0    | 0    | 0    | 0    | 0    | 0    | 0    | 0    | 0    | 0    | 0    | 0    | 0    | 0    | 0    | 0    | 0    | 72   | 0    | 0    | 0    | 0    |
| Peptostreptococcaceae                      | 0    | 0    | 0    | 0    | 0    | 0    | 0    | 0    | 0    | 0    | 0    | 26   | 0    | 0    | 0    | 0    | 0    | 0    | 0    | 0    | 0    | 0    |
| Morganella morganii                        | 0    | 0    | 0    | 0    | 0    | 0    | 0    | 0    | 0    | 0    | 0    | 0    | 0    | 0    | 0    | 0    | 0    | 0    | 0    | 0    | 0    | 0    |
| Neofamilia                                 | 0    | 0    | 0    | 0    | 0    | 0    | 0    | 0    | 0    | 0    | 0    | 0    | 0    | 0    | 0    | 0    | 0    | 0    | 0    | 0    | 0    | 0    |
| Pseudoclavibacter bifida                   | 0    | 0    | 0    | 0    | 0    | 0    | 0    | 0    | 0    | 0    | 0    | 0    | 0    | 0    | 0    | 0    | 0    | 0    | 0    | 0    | 0    | 0    |
| Helcococcus                                | 0    | 0    | 0    | 0    | 0    | 0    | 0    | 0    | 0    | 0    | 0    | 0    | 0    | 0    | 0    | 0    | 0    | 0    | 0    | 0    | 0    | 0    |
| Brevibacterium ravenspurgense              | 0    | 0    | 0    | 0    | 0    | 0    | 0    | 0    | 0    | 0    | 0    | 0    | 0    | 0    | 0    | 0    | 0    | 0    | 0    | 0    | 0    | 0    |
| Moryella indoligenes                       | 0    | 0    | 0    | 0    | 0    | 0    | 0    | 0    | 0    | 0    | 0    | 0    | 0    | 0    | 0    | 0    | 0    | 0    | 0    | 0    | 0    | 0    |
| Olegusella massiliensis                    | 0    | 0    | 0    | 0    | 0    | 0    | 0    | 0    | 0    | 0    | 0    | 0    | 0    | 0    | 0    | 0    | 0    | 0    | 0    | 0    | 0    | 0    |
| Morococcus cerebrosus                      | 0    | 0    | 0    | 0    | 0    | 0    | 0    | 0    | 0    | 0    | 0    | 0    | 0    | 0    | 0    | 0    | 0    | 0    | 0    | 0    | 0    | 0    |
| Prevotella scopos                          | 0    | 0    | 0    | 0    | 0    | 0    | 0    | 0    | 0    | 0    | 0    | 0    | 0    | 0    | 0    | 0    | 0    | 0    | 0    | 0    | 0    | 0    |
| Veillonella parvula/tobetsuensis           | 0    | 0    | 0    | 0    | 0    | 0    | 0    | 0    | 0    | 0    | 0    | 0    | 0    | 0    | 0    | 0    | 0    | 0    | 0    | 0    | 0    | 0    |
| Moryella                                   | 0    | 0    | 0    | 0    | 0    | 0    | 0    | 0    | 0    | 0    | 0    | 0    | 0    | 0    | 0    | 0    | 0    | 0    | 0    | 0    | 0    | 0    |
| Atopobium parvulum                         | 0    | 0    | 0    | 0    | 0    | 0    | 0    | 0    | 0    | 0    | 0    | 0    | 0    | 0    | 0    | 0    | 0    | 0    | 0    | 0    | 0    | 0    |
| Serratia marcescens                        | 0    | 0    | 0    | 0    | 0    | 0    | 0    | 0    | 0    | 0    | 0    | 0    | 0    | 0    | 0    | 0    | 0    | 0    | 0    | 0    | 0    | 0    |
| Collinsella aerofaciens                    | 0    | 0    | 0    | 0    | 0    | 0    | 0    | 0    | 0    | 0    | 0    | 0    | 0    | 0    | 0    | 0    | 0    | 0    | 0    | 0    | 0    | 0    |
| Curvibacter                                | 0    | 0    | 0    | 0    | 0    | 0    | 0    | 0    | 0    | 0    | 0    | 0    | 0    | 0    | 0    | 0    | 0    | 0    | 0    | 0    | 0    | 0    |
| Rothia dentocariosa                        | 0    | 0    | 0    | 0    | 0    | 0    | 0    | 0    | 0    | 0    | 0    | 0    | 0    | 0    | 0    | 0    | 0    | 0    | 0    | 0    | 0    | 0    |
| Prevotella bergensis                       | 0    | 0    | 0    | 0    | 0    | 38   | 0    | 0    | 0    | 0    | 0    | 0    | 0    | 0    | 0    | 0    | 0    | 33   | 0    | 0    | 0    | 0    |
| Corynebacterium sundsvallense              | 0    | 0    | 0    | 0    | 0    | 0    | 0    | 0    | 0    | 0    | 0    | 0    | 0    | 0    | 0    | 0    | 0    | 0    | 0    | 0    | 0    | 0    |

Samples S350 - S377

| Species                                       | S350 | S353 | S354 | S355 | S358 | S359 | S360 | S361 | S362 | S363 | S364 | S365 | S366 | S367 | S368 | S370 | S371 | S372 | S373 | S374 | S375 | S377 |
|-----------------------------------------------|------|------|------|------|------|------|------|------|------|------|------|------|------|------|------|------|------|------|------|------|------|------|
| Coriobacteria                                 | 0    | 0    | 0    | 0    | 0    | 0    | 0    | 0    | 0    | 0    | 0    | 0    | 0    | 0    | 0    | 0    | 0    | 0    | 0    | 0    | 0    | 0    |
| Neisseria meningitidis                        | 0    | 0    | 0    | 0    | 0    | 0    | 0    | 0    | 0    | 0    | 0    | 0    | 0    | 0    | 0    | 0    | 0    | 0    | 0    | 0    | 0    | 0    |
| Dermacoccus nishinomiyaensis                  | 0    | 0    | 0    | 0    | 0    | 0    | 0    | 0    | 0    | 0    | 0    | 0    | 0    | 0    | 0    | 0    | 0    | 0    | 0    | 0    | 0    | 0    |
| Leptotrichia                                  | 0    | 0    | 0    | 0    | 0    | 0    | 0    | 0    | 0    | 0    | 0    | 0    | 0    | 0    | 0    | 0    | 0    | 0    | 0    | 0    | 0    | 0    |
| Microbacteriaceae                             | 0    | 0    | 0    | 0    | 0    | 0    | 0    | 0    | 0    | 0    | 0    | 0    | 0    | 0    | 0    | 0    | 0    | 0    | 0    | 0    | 0    | 0    |
| Klebsiella pneumoniae/variiicola              | 0    | 0    | 0    | 0    | 0    | 0    | 0    | 0    | 0    | 0    | 0    | 0    | 0    | 0    | 0    | 0    | 0    | 0    | 0    | 0    | 0    | 640  |
| Hafnia alvei                                  | 0    | 0    | 0    | 0    | 0    | 0    | 0    | 0    | 0    | 0    | 0    | 0    | 0    | 0    | 0    | 0    | 0    | 0    | 0    | 0    | 0    | 0    |
| Caulobacter                                   | 0    | 0    | 0    | 0    | 0    | 0    | 0    | 0    | 0    | 0    | 0    | 0    | 0    | 0    | 0    | 0    | 0    | 0    | 0    | 0    | 0    | 0    |
| Lactobacillus reuteri                         | 0    | 0    | 0    | 0    | 0    | 0    | 0    | 0    | 0    | 0    | 0    | 0    | 0    | 0    | 371  | 0    | 0    | 0    | 0    | 0    | 0    | 0    |
| Gemella morbillorum                           | 0    | 0    | 0    | 0    | 0    | 0    | 0    | 0    | 0    | 0    | 0    | 0    | 0    | 0    | 0    | 0    | 0    | 0    | 0    | 0    | 0    | 0    |
| Rothia                                        | 0    | 0    | 0    | 0    | 0    | 0    | 0    | 0    | 0    | 0    | 0    | 0    | 0    | 0    | 0    | 0    | 0    | 0    | 0    | 0    | 0    | 0    |
| Campylobacter                                 | 0    | 0    | 0    | 0    | 0    | 0    | 0    | 0    | 0    | 0    | 0    | 0    | 0    | 0    | 0    | 0    | 0    | 0    | 0    | 0    | 0    | 0    |
| Prevotella genogroup 3                        | 0    | 0    | 0    | 0    | 0    | 0    | 0    | 0    | 0    | 0    | 0    | 0    | 0    | 0    | 0    | 0    | 0    | 0    | 0    | 0    | 0    | 0    |
| Staphylococcus warneri                        | 0    | 0    | 0    | 0    | 0    | 0    | 0    | 0    | 0    | 0    | 0    | 0    | 0    | 0    | 0    | 0    | 0    | 0    | 0    | 0    | 0    | 0    |
| Blautia wexlerae                              | 0    | 0    | 0    | 0    | 0    | 0    | 0    | 0    | 0    | 0    | 0    | 0    | 0    | 0    | 0    | 0    | 0    | 0    | 0    | 0    | 0    | 0    |
| Lachnoanaerobaculum                           | 0    | 0    | 0    | 0    | 0    | 0    | 0    | 0    | 0    | 0    | 0    | 0    | 0    | 0    | 0    | 0    | 0    | 0    | 0    | 0    | 0    | 0    |
| Anaerococcus hydrogenalis/senegalensis        | 0    | 0    | 0    | 0    | 0    | 0    | 0    | 0    | 0    | 0    | 0    | 0    | 0    | 0    | 0    | 0    | 0    | 0    | 0    | 0    | 0    | 0    |
| Brevibacterium mcbrellneri                    | 0    | 0    | 0    | 0    | 0    | 0    | 0    | 0    | 0    | 0    | 0    | 0    | 0    | 0    | 0    | 0    | 0    | 0    | 0    | 0    | 0    | 0    |
| Corynebacterium glaucum                       | 0    | 0    | 0    | 0    | 0    | 0    | 0    | 0    | 0    | 0    | 0    | 0    | 0    | 0    | 0    | 0    | 0    | 0    | 0    | 0    | 0    | 0    |
| Prevotella salivae                            | 0    | 0    | 0    | 0    | 0    | 0    | 0    | 0    | 0    | 0    | 0    | 0    | 0    | 0    | 0    | 0    | 0    | 0    | 0    | 0    | 0    | 0    |
| Coriobacteriaceae                             | 0    | 0    | 0    | 0    | 0    | 0    | 0    | 0    | 0    | 0    | 0    | 0    | 0    | 0    | 0    | 0    | 0    | 0    | 0    | 0    | 0    | 0    |
| Bulleidia                                     | 0    | 0    | 0    | 0    | 0    | 0    | 0    | 0    | 0    | 0    | 0    | 0    | 0    | 0    | 0    | 0    | 0    | 0    | 0    | 0    | 0    | 0    |
| Peptococcus                                   | 0    | 0    | 0    | 0    | 0    | 0    | 0    | 0    | 0    | 0    | 0    | 0    | 0    | 0    | 0    | 0    | 0    | 0    | 0    | 0    | 0    | 0    |
| Serratia marcescens/nematodiphila             | 0    | 0    | 0    | 0    | 0    | 0    | 0    | 0    | 0    | 0    | 0    | 0    | 0    | 0    | 0    | 0    | 0    | 0    | 0    | 0    | 0    | 0    |
| Leptotrichia wadei                            | 0    | 0    | 0    | 0    | 0    | 0    | 0    | 0    | 0    | 0    | 0    | 0    | 0    | 0    | 0    | 0    | 0    | 0    | 0    | 0    | 0    | 0    |
| Neisseriaceae                                 | 0    | 0    | 0    | 0    | 0    | 0    | 0    | 0    | 0    | 0    | 0    | 0    | 0    | 0    | 0    | 0    | 0    | 0    | 0    | 0    | 0    | 0    |
| Aerococcus sanguinicola                       | 0    | 0    | 0    | 0    | 0    | 0    | 0    | 0    | 0    | 0    | 0    | 0    | 0    | 0    | 0    | 0    | 0    | 0    | 0    | 0    | 0    | 0    |
| Criobacterium bergeronii                      | 0    | 0    | 0    | 0    | 0    | 0    | 0    | 0    | 0    | 0    | 0    | 226  | 0    | 0    | 0    | 0    | 0    | 0    | 0    | 0    | 0    | 0    |
| Brevibacterium luteolum                       | 0    | 0    | 0    | 0    | 0    | 0    | 0    | 0    | 0    | 0    | 0    | 0    | 0    | 0    | 0    | 0    | 0    | 0    | 0    | 0    | 0    | 0    |
| Klebsiella pneumoniae                         | 0    | 0    | 0    | 0    | 0    | 0    | 0    | 0    | 0    | 0    | 0    | 0    | 0    | 0    | 0    | 0    | 0    | 0    | 0    | 0    | 0    | 827  |
| Actinomyces oris/viscosus                     | 0    | 0    | 0    | 0    | 0    | 0    | 0    | 0    | 0    | 0    | 0    | 0    | 0    | 0    | 0    | 0    | 0    | 0    | 0    | 0    | 0    | 0    |
| Mycobacterium chelonae complex                | 0    | 0    | 0    | 0    | 0    | 0    | 0    | 0    | 0    | 0    | 0    | 0    | 0    | 0    | 0    | 0    | 0    | 0    | 0    | 0    | 0    | 0    |
| Corynebacterium jeddahense                    | 0    | 0    | 0    | 0    | 0    | 0    | 0    | 0    | 0    | 0    | 0    | 0    | 0    | 0    | 0    | 0    | 0    | 0    | 0    | 0    | 0    | 0    |
| Peptostreptococcus stomatis                   | 0    | 0    | 0    | 0    | 0    | 0    | 0    | 0    | 0    | 0    | 0    | 0    | 0    | 0    | 0    | 0    | 0    | 0    | 0    | 0    | 0    | 0    |
| Megasphaera                                   | 0    | 0    | 0    | 0    | 0    | 0    | 0    | 0    | 0    | 0    | 0    | 0    | 0    | 0    | 0    | 0    | 0    | 0    | 0    | 0    | 0    | 0    |
| Campylobacter rectus/showae                   | 0    | 0    | 0    | 0    | 0    | 0    | 0    | 0    | 0    | 0    | 0    | 0    | 0    | 0    | 0    | 0    | 0    | 0    | 0    | 0    | 0    | 0    |
| Staphylococcus carnosus/condimenti            | 0    | 0    | 0    | 0    | 0    | 0    | 0    | 0    | 0    | 0    | 0    | 0    | 0    | 0    | 0    | 0    | 0    | 0    | 0    | 0    | 0    | 0    |
| Prevotella pallens                            | 0    | 0    | 0    | 0    | 0    | 0    | 0    | 0    | 0    | 0    | 0    | 0    | 0    | 0    | 0    | 0    | 0    | 0    | 0    | 0    | 0    | 0    |
| Prolinoborus fasciculus/Acinetobacter lwoffii | 0    | 0    | 0    | 0    | 0    | 0    | 0    | 0    | 0    | 0    | 0    | 0    | 0    | 0    | 0    | 0    | 0    | 0    | 0    | 0    | 0    | 0    |
| Staphylococcus nepalensis                     | 0    | 0    | 0    | 0    | 0    | 0    | 0    | 0    | 0    | 0    | 0    | 0    | 0    | 0    | 0    | 0    | 0    | 0    | 0    | 0    | 0    | 0    |
| Staphylococcaceae                             | 0    | 0    | 0    | 0    | 0    | 0    | 0    | 0    | 0    | 0    | 0    | 0    | 0    | 0    | 0    | 0    | 0    | 0    | 0    | 0    | 0    | 0    |
| Cruoricaptor                                  | 0    | 0    | 0    | 0    | 0    | 0    | 0    | 0    | 0    | 0    | 0    | 0    | 0    | 0    | 0    | 0    | 0    | 0    | 0    | 0    | 0    | 0    |
| [Eubacterium] hallii                          | 0    | 0    | 0    | 0    | 0    | 0    | 0    | 0    | 0    | 0    | 0    | 0    | 0    | 0    | 0    | 0    | 0    | 0    | 0    | 0    | 0    | 0    |
| BVAB1 (species)                               | 0    | 0    | 0    | 0    | 0    | 0    | 0    | 0    | 0    | 0    | 0    | 0    | 0    | 0    | 0    | 0    | 0    | 0    | 0    | 0    | 0    | 0    |
| Stomatobaculum                                | 0    | 0    | 0    | 0    | 0    | 0    | 0    | 0    | 0    | 0    | 0    | 0    | 0    | 0    | 0    | 0    | 0    | 0    | 0    | 0    | 0    | 0    |
| Mycoplasma                                    | 0    | 0    | 0    | 0    | 0    | 0    | 0    | 0    | 0    | 0    | 0    | 0    | 0    | 0    | 0    | 0    | 0    | 0    | 0    | 0    | 0    | 0    |
| Catenibacterium mitsuokai                     | 0    | 0    | 0    | 0    | 0    | 0    | 0    | 0    | 0    | 0    | 0    | 0    | 0    | 0    | 0    | 0    | 0    | 0    | 0    | 0    | 0    | 0    |
| Veillonella parvula                           | 0    | 0    | 0    | 0    | 0    | 0    | 0    | 0    | 0    | 0    | 0    | 0    | 0    | 0    | 0    | 0    | 0    | 0    | 0    | 0    | 0    | 232  |
| Corynebacterium kroppenstedtii                | 0    | 0    | 0    | 0    | 0    | 0    | 0    | 0    | 0    | 0    | 0    | 0    | 0    | 0    | 0    | 0    | 0    | 0    | 0    | 0    | 0    | 0    |
| Eremococcus coleocola                         | 0    | 0    | 0    | 0    | 0    | 0    | 0    | 0    | 0    | 0    | 0    | 0    | 0    | 0    | 0    | 0    | 0    | 0    | 0    | 0    | 0    | 0    |
| Actinomyces europaeus                         | 0    | 0    | 0    | 0    | 0    | 0    | 0    | 0    | 0    | 0    | 0    | 0    | 0    | 0    | 0    | 0    | 0    | 0    | 0    | 0    | 0    | 0    |
| Peptoniphilus senegalensis                    | 0    | 0    | 0    | 0    | 0    | 0    | 0    | 0    | 0    | 0    | 0    | 0    | 0    | 0    | 0    | 0    | 0    | 0    | 0    | 0    | 0    | 0    |
| Corynebacterium afermentans/humii             | 0    | 0    | 0    | 0    | 0    | 0    | 0    | 0    | 0    | 0    | 0    | 0    | 0    | 0    | 0    | 0    | 0    | 0    | 0    | 0    | 0    | 0    |
| Acinetobacter                                 | 0    | 0    | 0    | 0    | 0    | 0    | 0    | 0    | 0    | 0    | 0    | 0    | 0    | 0    | 0    | 0    | 0    | 0    | 0    | 0    | 0    | 0    |
| Eggerthellaceae                               | 0    | 0    | 0    | 0    | 0    | 0    | 0    | 0    | 0    | 0    | 0    | 0    | 0    | 0    | 0    | 0    | 0    | 0    | 0    | 0    | 0    | 0    |
| Corynebacterium mucifaciens                   | 0    | 0    | 0    | 0    | 0    | 0    | 0    | 0    | 0    | 0    | 0    | 0    | 0    | 0    | 0    | 0    | 0    | 0    | 0    | 0    | 0    | 0    |
| Filifactor                                    | 0    | 0    | 0    | 0    | 0    | 0    | 0    | 0    | 0    | 0    | 0    | 0    | 0    | 0    | 0    | 0    | 0    | 0    | 0    | 0    | 0    | 0    |
| Ruminococcus faecis                           | 0    | 0    | 0    | 0    | 0    | 0    | 0    | 0    | 0    | 0    | 0    | 0    | 0    | 0    | 0    | 0    | 0    | 0    | 0    | 0    | 0    | 0    |
| Lactobacillus                                 | 0    | 0    | 0    | 0    | 0    | 0    | 0    | 0    | 0    | 0    | 0    | 0    | 0    | 0    | 0    | 0    | 0    | 0    | 0    | 0    | 0    | 0    |
| Peptoniphilus grossensis/rhinitidis           | 0    | 0    | 0    | 0    | 0    | 0    | 0    | 0    | 0    | 0    | 0    | 0    | 0    | 0    | 0    | 0    | 0    | 0    | 0    | 0    | 0    | 0    |
| Aerococcus urinaequi/viridans                 | 0    | 0    | 0    | 0    | 0    | 0    | 0    | 0    | 0    | 0    | 0    | 0    | 0    | 0    | 0    | 0    | 0    | 0    | 0    | 0    | 0    | 0    |
| Anaerostipes hadrus                           | 0    | 0    | 0    | 0    | 0    | 0    | 0    | 0    | 0    | 0    | 0    | 0    | 0    | 0    | 0    | 0    | 0    | 0    | 0    | 0    | 0    | 0    |
| Lagierella                                    | 0    | 0    | 0    | 0    | 0    | 0    | 0    | 0    | 0    | 0    | 0    | 67   | 0    | 0    | 0    | 0    | 0    | 0    | 0    | 0    | 0    | 0    |
| Neisseria cinerea/meningitidis                | 0    | 0    | 0    | 0    | 0    | 0    | 0    | 0    | 0    | 0    | 0    | 0    | 0    | 0    | 0    | 0    | 0    | 0    | 0    | 0    | 0    | 0    |
| Micrococcus lysae                             | 0    | 0    | 0    | 0    | 0    | 0    | 0    | 0    | 0    | 0    | 0    | 0    | 0    | 0    | 0    | 0    | 0    | 0    | 0    | 0    | 0    | 0    |
| Staphylococcus cohnii                         | 0    | 0    | 0    | 0    | 0    | 0    | 0    | 0    | 0    | 0    | 0    | 0    | 0    | 0    | 0    | 0    | 0    | 0    | 0    | 0    | 0    | 0    |
| Casaltella massiliensis                       | 0    | 0    | 0    | 0    | 0    | 0    | 0    | 0    | 0    | 0    | 0    | 0    | 0    | 0    | 0    | 0    | 0    | 0    | 0    | 0    | 0    | 0    |
| Stomatobaculum longum                         | 0    | 0    | 0    | 0    | 0    | 0    | 0    | 0    | 0    | 0    | 0    | 0    | 0    | 0    | 0    | 0    | 0    | 0    | 0    | 0    | 0    | 0    |
| Lautropia                                     | 0    | 0    | 0    | 0    | 0    | 0    | 0    | 0    | 0    | 0    | 0    | 0    | 0    | 0    | 0    | 0    | 0    | 0    | 0    | 0    | 0    | 0    |
| Fastidiosipila                                | 0    | 0    | 0    | 0    | 0    | 0    | 0    | 0    | 0    | 0    | 0    | 0    | 0    | 0    | 0    | 0    | 0    | 0    | 0    | 0    | 0    | 0    |



Samples S350 - S377

| Species                                      | S350 | S353 | S354 | S355 | S358 | S359 | S360 | S361 | S362 | S363 | S364 | S365 | S366 | S367 | S368 | S370 | S371 | S372 | S373 | S374 | S375 | S377 |
|----------------------------------------------|------|------|------|------|------|------|------|------|------|------|------|------|------|------|------|------|------|------|------|------|------|------|
| Corynebacterium durum                        | 0    | 0    | 0    | 0    | 0    | 0    | 0    | 0    | 0    | 0    | 0    | 0    | 0    | 0    | 0    | 0    | 0    | 0    | 0    | 0    | 0    | 0    |
| Actinomyces graevenitzii                     | 0    | 0    | 0    | 0    | 0    | 0    | 0    | 0    | 0    | 0    | 0    | 0    | 0    | 0    | 0    | 0    | 0    | 0    | 0    | 0    | 0    | 32   |
| Staphylococcus cohnii/saprophyticus          | 0    | 0    | 0    | 0    | 0    | 0    | 0    | 0    | 0    | 0    | 0    | 0    | 0    | 0    | 0    | 0    | 0    | 0    | 0    | 0    | 0    | 0    |
| Leptotrichia trevisanii                      | 0    | 0    | 0    | 0    | 0    | 0    | 0    | 0    | 0    | 0    | 0    | 0    | 0    | 0    | 0    | 0    | 0    | 0    | 0    | 0    | 0    | 0    |
| Candidatus Paraburkholderia calva            | 0    | 0    | 0    | 0    | 0    | 0    | 0    | 0    | 0    | 0    | 0    | 0    | 0    | 0    | 0    | 0    | 0    | 0    | 0    | 0    | 0    | 0    |
| Actinomyces urogenitalis                     | 0    | 0    | 0    | 0    | 0    | 0    | 0    | 0    | 0    | 0    | 0    | 0    | 0    | 0    | 0    | 0    | 0    | 0    | 0    | 0    | 0    | 0    |
| Clostridiales                                | 0    | 0    | 0    | 0    | 0    | 0    | 0    | 0    | 0    | 0    | 0    | 0    | 0    | 0    | 0    | 0    | 0    | 0    | 0    | 0    | 0    | 0    |
| Pasteurella caballi                          | 0    | 0    | 0    | 0    | 0    | 0    | 0    | 0    | 0    | 0    | 0    | 0    | 0    | 0    | 0    | 0    | 0    | 0    | 0    | 0    | 0    | 0    |
| Fusobacterium hwasookii/nucleatum            | 0    | 0    | 0    | 0    | 0    | 0    | 0    | 0    | 0    | 0    | 0    | 0    | 0    | 0    | 0    | 0    | 0    | 136  | 0    | 0    | 0    | 0    |
| Corynebacterium riegelii                     | 0    | 0    | 0    | 0    | 0    | 0    | 0    | 0    | 0    | 0    | 0    | 0    | 0    | 0    | 0    | 0    | 0    | 0    | 0    | 0    | 0    | 0    |
| Hafnia                                       | 0    | 0    | 0    | 0    | 0    | 0    | 0    | 0    | 0    | 0    | 0    | 0    | 0    | 0    | 0    | 0    | 0    | 0    | 0    | 0    | 0    | 0    |
| Staphylococcus equorum/saprophyticus/xylosum | 0    | 0    | 0    | 0    | 0    | 0    | 0    | 0    | 0    | 0    | 0    | 0    | 0    | 0    | 0    | 0    | 0    | 0    | 0    | 0    | 0    | 0    |
| Acinetobacter lwoffii                        | 0    | 0    | 0    | 0    | 0    | 0    | 0    | 0    | 0    | 0    | 0    | 0    | 0    | 0    | 0    | 0    | 0    | 0    | 0    | 0    | 0    | 0    |
| Micrococcus cohnii                           | 0    | 0    | 0    | 0    | 0    | 0    | 0    | 0    | 0    | 0    | 0    | 0    | 0    | 0    | 0    | 0    | 0    | 0    | 0    | 0    | 0    | 0    |
| Pseudoclavibacter faecalis                   | 0    | 0    | 0    | 0    | 0    | 0    | 0    | 0    | 0    | 0    | 0    | 0    | 0    | 0    | 0    | 0    | 0    | 0    | 0    | 0    | 0    | 0    |
| Leptotrichia buccalis                        | 0    | 0    | 0    | 0    | 0    | 0    | 0    | 0    | 0    | 0    | 0    | 0    | 0    | 0    | 0    | 0    | 0    | 0    | 0    | 0    | 0    | 0    |
| Actinomyces                                  | 0    | 0    | 0    | 0    | 0    | 0    | 0    | 0    | 0    | 0    | 0    | 0    | 0    | 0    | 0    | 0    | 0    | 0    | 0    | 0    | 0    | 36   |
| Fusobacterium nucleatum/periodonticum        | 0    | 0    | 0    | 0    | 0    | 0    | 0    | 0    | 0    | 0    | 0    | 0    | 0    | 0    | 0    | 0    | 0    | 0    | 0    | 0    | 0    | 0    |
| Lactobacillus saerimneri                     | 0    | 0    | 0    | 0    | 0    | 0    | 0    | 0    | 0    | 0    | 0    | 0    | 0    | 0    | 102  | 0    | 0    | 0    | 0    | 0    | 0    | 0    |
| Actinomycetaceae                             | 0    | 0    | 0    | 0    | 0    | 0    | 0    | 0    | 0    | 0    | 0    | 0    | 0    | 0    | 0    | 0    | 0    | 0    | 0    | 0    | 0    | 0    |
| Dialister                                    | 0    | 0    | 0    | 0    | 0    | 0    | 0    | 0    | 0    | 0    | 0    | 0    | 0    | 0    | 0    | 0    | 0    | 0    | 0    | 0    | 0    | 0    |
| Neisseria mucosa/subflava                    | 0    | 0    | 0    | 0    | 0    | 0    | 0    | 0    | 0    | 0    | 0    | 0    | 0    | 0    | 0    | 0    | 0    | 0    | 0    | 0    | 0    | 0    |
| Paracoccus                                   | 0    | 0    | 0    | 0    | 0    | 0    | 0    | 0    | 0    | 0    | 0    | 0    | 0    | 0    | 0    | 0    | 0    | 0    | 0    | 0    | 0    | 0    |
| Acinetobacter haemolyticus/johnsonii         | 0    | 0    | 0    | 0    | 0    | 0    | 0    | 0    | 0    | 0    | 0    | 0    | 0    | 0    | 0    | 0    | 0    | 0    | 0    | 0    | 0    | 0    |
| Neisseria subflava                           | 0    | 0    | 0    | 0    | 0    | 0    | 0    | 0    | 0    | 0    | 0    | 0    | 0    | 0    | 0    | 0    | 0    | 0    | 0    | 0    | 0    | 0    |
| Acinetobacter proteolyticus                  | 0    | 0    | 0    | 0    | 0    | 0    | 0    | 0    | 0    | 0    | 0    | 0    | 0    | 0    | 0    | 0    | 0    | 0    | 0    | 0    | 0    | 0    |
| Dorea formicigenerans                        | 0    | 0    | 0    | 0    | 0    | 0    | 0    | 0    | 0    | 0    | 0    | 0    | 0    | 0    | 0    | 0    | 0    | 0    | 0    | 0    | 0    | 0    |
| Corynebacterium tuscaniense                  | 0    | 0    | 0    | 0    | 0    | 0    | 0    | 0    | 0    | 0    | 0    | 0    | 0    | 0    | 0    | 0    | 0    | 0    | 0    | 0    | 0    | 0    |
| Massiliomicrobiota timonensis                | 0    | 0    | 0    | 0    | 0    | 0    | 0    | 0    | 0    | 0    | 0    | 0    | 0    | 0    | 0    | 0    | 0    | 0    | 0    | 0    | 0    | 0    |
| Fusobacterium hwasookii                      | 0    | 0    | 0    | 0    | 0    | 0    | 0    | 0    | 0    | 0    | 0    | 0    | 0    | 0    | 0    | 0    | 0    | 0    | 0    | 0    | 0    | 0    |
| Pseudoglutamicibacter albus                  | 0    | 0    | 0    | 0    | 0    | 0    | 0    | 0    | 0    | 0    | 0    | 0    | 0    | 0    | 0    | 0    | 0    | 0    | 0    | 0    | 0    | 0    |
| Clostridiales Family XIII. Incertae Sedis    | 0    | 0    | 0    | 0    | 0    | 0    | 0    | 0    | 0    | 0    | 0    | 0    | 0    | 0    | 0    | 0    | 0    | 0    | 0    | 0    | 0    | 0    |
| Kocuria marina/rhizophila                    | 0    | 0    | 0    | 0    | 0    | 0    | 0    | 0    | 0    | 0    | 0    | 0    | 0    | 0    | 0    | 0    | 0    | 0    | 0    | 0    | 0    | 0    |
| Kocuria                                      | 0    | 0    | 0    | 0    | 0    | 0    | 0    | 0    | 0    | 0    | 0    | 0    | 0    | 0    | 0    | 0    | 0    | 0    | 0    | 0    | 0    | 0    |
| Alloprevotella rava                          | 0    | 0    | 0    | 0    | 0    | 0    | 0    | 0    | 0    | 0    | 0    | 0    | 0    | 0    | 0    | 0    | 0    | 0    | 0    | 0    | 0    | 0    |
| Staphylococcus pettenkoferi                  | 0    | 0    | 0    | 0    | 0    | 0    | 0    | 0    | 0    | 0    | 0    | 0    | 0    | 0    | 0    | 0    | 0    | 0    | 0    | 0    | 0    | 0    |
| Streptococcus pseudoporcinus                 | 0    | 0    | 0    | 0    | 0    | 0    | 0    | 0    | 0    | 0    | 0    | 0    | 0    | 0    | 0    | 0    | 0    | 0    | 0    | 0    | 0    | 0    |
| Kingella                                     | 0    | 0    | 0    | 0    | 0    | 0    | 0    | 0    | 0    | 0    | 0    | 0    | 0    | 0    | 0    | 0    | 0    | 0    | 0    | 0    | 0    | 0    |
| Eikenella                                    | 0    | 0    | 0    | 0    | 0    | 0    | 0    | 0    | 0    | 0    | 0    | 0    | 0    | 0    | 0    | 0    | 0    | 0    | 0    | 0    | 0    | 0    |
| Actinomyces odontolyticus                    | 0    | 0    | 0    | 0    | 0    | 0    | 0    | 0    | 0    | 0    | 0    | 0    | 0    | 0    | 0    | 0    | 0    | 0    | 0    | 0    | 0    | 53   |
| Corynebacterium sphenisci                    | 0    | 0    | 0    | 0    | 0    | 0    | 0    | 0    | 0    | 0    | 0    | 0    | 0    | 0    | 0    | 0    | 0    | 0    | 0    | 0    | 0    | 0    |
| Cutibacterium                                | 0    | 0    | 0    | 0    | 0    | 0    | 0    | 0    | 0    | 0    | 0    | 0    | 0    | 0    | 0    | 0    | 0    | 0    | 0    | 0    | 0    | 0    |
| Staphylococcus xylosum                       | 0    | 0    | 0    | 0    | 0    | 0    | 0    | 0    | 0    | 0    | 0    | 0    | 0    | 0    | 0    | 0    | 0    | 0    | 0    | 0    | 0    | 0    |
| Burkholderiales                              | 0    | 0    | 0    | 0    | 0    | 0    | 0    | 0    | 0    | 0    | 0    | 0    | 0    | 0    | 0    | 0    | 0    | 0    | 0    | 0    | 0    | 0    |
| Massiliomicrobiota/Mycoplasma                | 0    | 0    | 0    | 0    | 0    | 0    | 0    | 0    | 0    | 0    | 0    | 0    | 0    | 0    | 0    | 0    | 0    | 0    | 0    | 0    | 0    | 0    |
| Bacteroidales                                | 0    | 0    | 0    | 0    | 0    | 0    | 0    | 0    | 0    | 0    | 0    | 0    | 0    | 0    | 0    | 0    | 0    | 0    | 0    | 0    | 0    | 0    |
| Campylobacter fetus                          | 0    | 0    | 0    | 0    | 0    | 0    | 0    | 0    | 0    | 0    | 0    | 0    | 0    | 0    | 0    | 0    | 0    | 28   | 0    | 0    | 0    | 0    |
| Prevotella aurantiaca                        | 0    | 0    | 0    | 0    | 0    | 0    | 0    | 0    | 0    | 0    | 0    | 0    | 0    | 0    | 0    | 0    | 0    | 0    | 0    | 0    | 0    | 0    |
| Corynebacterium freneyi/xerosis              | 0    | 0    | 0    | 0    | 0    | 0    | 0    | 0    | 0    | 0    | 0    | 0    | 0    | 0    | 0    | 0    | 0    | 0    | 0    | 0    | 0    | 0    |
| Aerococcaceae                                | 0    | 0    | 0    | 0    | 0    | 0    | 0    | 0    | 0    | 0    | 0    | 0    | 0    | 0    | 0    | 0    | 0    | 0    | 0    | 0    | 0    | 0    |
| Moraxella lacunata                           | 0    | 0    | 0    | 0    | 0    | 0    | 0    | 0    | 0    | 0    | 0    | 0    | 0    | 0    | 0    | 0    | 0    | 0    | 0    | 0    | 0    | 0    |
| Corynebacterium accolens/macginleyi          | 0    | 0    | 0    | 0    | 0    | 0    | 0    | 0    | 0    | 0    | 0    | 0    | 0    | 0    | 0    | 0    | 0    | 0    | 0    | 0    | 0    | 0    |
| Massilia aurea                               | 0    | 0    | 0    | 0    | 0    | 0    | 0    | 0    | 0    | 0    | 0    | 0    | 0    | 0    | 0    | 0    | 0    | 0    | 0    | 0    | 0    | 0    |
| Corynebacterium casei                        | 0    | 0    | 0    | 0    | 0    | 0    | 0    | 0    | 0    | 0    | 0    | 0    | 0    | 0    | 0    | 0    | 0    | 0    | 0    | 0    | 0    | 0    |
| Helcococcus sueciensis                       | 0    | 0    | 0    | 0    | 0    | 0    | 0    | 0    | 0    | 0    | 0    | 0    | 0    | 0    | 0    | 0    | 0    | 0    | 0    | 0    | 0    | 0    |
| Lactobacillus casei/rhannosus                | 0    | 0    | 0    | 0    | 0    | 0    | 0    | 0    | 0    | 0    | 0    | 0    | 0    | 0    | 0    | 0    | 0    | 0    | 0    | 0    | 0    | 0    |
| Holdemanella biformis                        | 0    | 0    | 0    | 0    | 0    | 0    | 0    | 0    | 0    | 0    | 0    | 0    | 0    | 0    | 0    | 0    | 0    | 0    | 0    | 0    | 0    | 0    |
| Pelistega                                    | 0    | 0    | 0    | 0    | 0    | 0    | 0    | 0    | 0    | 0    | 0    | 0    | 0    | 0    | 0    | 0    | 0    | 0    | 0    | 0    | 0    | 0    |
| Actinomyces massiliensis                     | 0    | 0    | 0    | 0    | 0    | 0    | 0    | 0    | 0    | 0    | 0    | 0    | 0    | 0    | 0    | 0    | 0    | 0    | 0    | 0    | 0    | 0    |
| Massilia                                     | 0    | 0    | 0    | 0    | 0    | 0    | 0    | 0    | 0    | 0    | 0    | 0    | 0    | 0    | 0    | 0    | 0    | 0    | 0    | 0    | 0    | 0    |
| Staphylococcus equorum/xylosum               | 0    | 0    | 0    | 0    | 0    | 0    | 0    | 0    | 0    | 0    | 0    | 0    | 0    | 0    | 0    | 0    | 0    | 0    | 0    | 0    | 0    | 0    |
| Streptococcus                                | 0    | 0    | 0    | 0    | 0    | 0    | 0    | 0    | 0    | 0    | 0    | 0    | 0    | 0    | 0    | 0    | 0    | 0    | 0    | 0    | 0    | 0    |
| Cutibacterium avidum                         | 0    | 0    | 0    | 0    | 0    | 0    | 0    | 0    | 0    | 0    | 0    | 0    | 0    | 0    | 0    | 0    | 0    | 0    | 0    | 0    | 0    | 0    |

# Samples S378 - S410

| Species                                            | S378  | S379 | S380 | S382 | S384  | S385 | S386  | S388 | S390 | S391 | S392 | S394  | S396  | S397 | S399 | S400 | S401 | S404  | S405  | S407  | S408 | S410 |
|----------------------------------------------------|-------|------|------|------|-------|------|-------|------|------|------|------|-------|-------|------|------|------|------|-------|-------|-------|------|------|
| Streptococcus mitis group                          | 32893 | 4343 | 2302 | 814  | 0     | 0    | 57    | 5539 | 420  | 777  | 6613 | 24765 | 22007 | 0    | 0    | 5787 | 92   | 18478 | 679   | 150   | 0    | 0    |
| Lactobacillus iners                                | 0     | 0    | 0    | 0    | 0     | 0    | 0     | 0    | 0    | 0    | 0    | 0     | 0     | 0    | 0    | 0    | 0    | 0     | 0     | 0     | 0    | 0    |
| Gardnerella vaginalis                              | 0     | 0    | 6825 | 4467 | 0     | 0    | 0     | 0    | 0    | 3544 | 0    | 0     | 0     | 0    | 0    | 0    | 84   | 0     | 6370  | 0     | 0    | 0    |
| Corynebacterium pseudogenitalium/tuberculostrictum | 733   | 247  | 0    | 1542 | 162   | 2991 | 335   | 186  | 8073 | 76   | 1781 | 871   | 200   | 133  | 1581 | 54   | 113  | 26    | 47    | 0     | 0    | 0    |
| Streptococcus agalactiae                           | 0     | 0    | 0    | 0    | 0     | 0    | 0     | 0    | 0    | 0    | 0    | 0     | 0     | 5219 | 0    | 211  | 0    | 0     | 0     | 67    | 5626 | 1162 |
| Veillonella montpellierensis                       | 0     | 0    | 0    | 0    | 0     | 0    | 0     | 0    | 0    | 0    | 0    | 0     | 0     | 0    | 0    | 0    | 0    | 0     | 0     | 10458 | 0    | 0    |
| Streptococcus anginosus                            | 0     | 0    | 0    | 5137 | 0     | 0    | 0     | 33   | 0    | 0    | 0    | 0     | 0     | 0    | 0    | 0    | 1286 | 0     | 84    | 311   | 68   | 0    |
| Chlamydia trachomatis                              | 0     | 0    | 0    | 0    | 0     | 0    | 0     | 0    | 0    | 0    | 0    | 0     | 0     | 0    | 0    | 0    | 0    | 1452  | 0     | 0     | 0    | 0    |
| Haemophilus parainfluenzae                         | 308   | 0    | 0    | 46   | 0     | 0    | 10354 | 344  | 0    | 0    | 0    | 0     | 0     | 0    | 0    | 5332 | 2180 | 0     | 0     | 0     | 0    | 5250 |
| Finegoldia magna                                   | 33    | 141  | 0    | 1981 | 15384 | 113  | 1027  | 298  | 90   | 0    | 0    | 28    | 0     | 59   | 0    | 0    | 8176 | 0     | 139   | 390   | 0    | 1516 |
| Peptoniphilus asaccharolyticus/grossensis/harei    | 0     | 133  | 0    | 1488 | 0     | 0    | 538   | 0    | 0    | 0    | 0    | 0     | 0     | 71   | 0    | 327  | 3680 | 0     | 204   | 144   | 0    | 36   |
| Sneathia amnii                                     | 0     | 0    | 0    | 357  | 0     | 0    | 0     | 0    | 0    | 0    | 0    | 0     | 0     | 0    | 0    | 0    | 0    | 0     | 0     | 0     | 0    | 0    |
| Staphylococcus caprae/cohnii/epidermidis           | 2227  | 133  | 45   | 47   | 1188  | 950  | 47    | 54   | 190  | 0    | 233  | 94    | 106   | 0    | 1372 | 0    | 0    | 0     | 0     | 0     | 0    | 0    |
| Gemella haemolysans/taiwanensis                    | 81    | 0    | 0    | 0    | 0     | 0    | 0     | 35   | 0    | 0    | 0    | 0     | 0     | 0    | 0    | 156  | 0    | 0     | 430   | 0     | 0    | 55   |
| Sneathia sanguinogens                              | 0     | 0    | 0    | 0    | 0     | 0    | 0     | 0    | 0    | 0    | 0    | 0     | 0     | 0    | 0    | 0    | 0    | 0     | 0     | 0     | 0    | 0    |
| Mycoplasma genitalium                              | 0     | 0    | 0    | 0    | 0     | 0    | 15397 | 0    | 0    | 0    | 0    | 0     | 0     | 0    | 0    | 0    | 0    | 0     | 0     | 0     | 0    | 0    |
| Mycoplasma penetrans                               | 0     | 0    | 0    | 0    | 0     | 3725 | 0     | 0    | 0    | 0    | 0    | 0     | 0     | 0    | 0    | 0    | 0    | 0     | 0     | 0     | 0    | 0    |
| Haemophilus haemolyticus/quentini                  | 0     | 418  | 0    | 0    | 0     | 0    | 0     | 681  | 0    | 0    | 0    | 0     | 0     | 0    | 0    | 54   | 0    | 77    | 0     | 0     | 0    | 0    |
| Corynebacterium pyruvicoproductens                 | 0     | 0    | 0    | 892  | 2905  | 0    | 0     | 0    | 0    | 0    | 0    | 0     | 0     | 0    | 0    | 0    | 2994 | 0     | 0     | 0     | 0    | 0    |
| Anaerococcus prevotii/tetradicus                   | 0     | 0    | 0    | 65   | 0     | 0    | 0     | 107  | 0    | 0    | 0    | 0     | 0     | 0    | 0    | 0    | 216  | 145   | 373   | 63    | 0    | 0    |
| Haemophilus influenzae                             | 0     | 0    | 0    | 0    | 0     | 0    | 0     | 0    | 0    | 0    | 0    | 0     | 0     | 0    | 0    | 0    | 0    | 513   | 0     | 0     | 0    | 8454 |
| Staphylococcus epidermidis/hominis                 | 233   | 36   | 0    | 56   | 814   | 642  | 221   | 42   | 248  | 0    | 666  | 72    | 50    | 0    | 208  | 35   | 47   | 0     | 0     | 0     | 0    | 0    |
| Atopobium vaginae                                  | 0     | 0    | 0    | 198  | 0     | 0    | 0     | 0    | 0    | 0    | 0    | 0     | 0     | 0    | 0    | 0    | 0    | 0     | 0     | 0     | 0    | 0    |
| Ureaplasma parvum/urealyticum                      | 0     | 161  | 1102 | 0    | 0     | 0    | 0     | 1490 | 153  | 0    | 0    | 0     | 0     | 0    | 0    | 0    | 2315 | 385   | 31058 | 0     | 0    | 0    |
| Prevotella timonensis                              | 0     | 0    | 0    | 105  | 0     | 0    | 130   | 0    | 0    | 0    | 0    | 0     | 0     | 55   | 0    | 0    | 0    | 0     | 0     | 0     | 0    | 0    |
| Fenollaria massiliensis/timonensis                 | 0     | 0    | 0    | 0    | 0     | 0    | 0     | 0    | 0    | 0    | 0    | 0     | 0     | 0    | 0    | 0    | 0    | 0     | 0     | 0     | 0    | 0    |
| Anaerococcus                                       | 0     | 0    | 0    | 1315 | 384   | 0    | 2496  | 236  | 94   | 0    | 0    | 0     | 0     | 279  | 0    | 268  | 0    | 0     | 0     | 0     | 0    | 0    |
| Corynebacterium coyleae                            | 0     | 0    | 0    | 0    | 0     | 0    | 138   | 0    | 0    | 0    | 0    | 34    | 0     | 0    | 0    | 0    | 0    | 0     | 0     | 0     | 0    | 0    |
| Prevotella bivia                                   | 0     | 209  | 0    | 343  | 0     | 0    | 0     | 0    | 0    | 0    | 0    | 0     | 0     | 92   | 0    | 0    | 0    | 0     | 0     | 36    | 0    | 1057 |
| Prevotella melaninogenica                          | 0     | 0    | 0    | 212  | 0     | 0    | 0     | 0    | 0    | 0    | 0    | 0     | 0     | 0    | 0    | 0    | 0    | 0     | 0     | 0     | 0    | 0    |
| Corynebacterium aurimucosum/minusissimum/singulare | 42    | 0    | 0    | 464  | 0     | 362  | 38    | 0    | 1434 | 0    | 394  | 262   | 26    | 55   | 0    | 0    | 0    | 0     | 0     | 0     | 0    | 0    |
| Staphylococcus aureus                              | 0     | 0    | 0    | 0    | 0     | 0    | 0     | 0    | 0    | 0    | 0    | 0     | 0     | 0    | 8239 | 0    | 0    | 0     | 0     | 0     | 0    | 0    |
| Anaerococcus lactolyticus                          | 0     | 219  | 0    | 0    | 0     | 0    | 0     | 0    | 0    | 0    | 0    | 0     | 0     | 0    | 0    | 0    | 0    | 0     | 0     | 0     | 0    | 0    |
| Aerococcus christensenii                           | 0     | 0    | 2061 | 0    | 0     | 0    | 0     | 0    | 0    | 0    | 0    | 0     | 0     | 0    | 0    | 0    | 0    | 0     | 0     | 0     | 0    | 0    |
| Corynebacterium glucuronolyticum                   | 0     | 0    | 0    | 0    | 0     | 49   | 0     | 160  | 0    | 0    | 199  | 0     | 0     | 0    | 0    | 0    | 333  | 0     | 0     | 0     | 0    | 0    |
| Veillonella atypica                                | 8924  | 0    | 0    | 0    | 0     | 0    | 0     | 135  | 0    | 0    | 0    | 0     | 0     | 231  | 0    | 0    | 0    | 0     | 0     | 0     | 0    | 0    |
| Veillonella                                        | 0     | 0    | 0    | 0    | 0     | 0    | 0     | 0    | 0    | 0    | 0    | 0     | 0     | 0    | 0    | 0    | 0    | 0     | 72    | 0     | 0    | 0    |
| Mycoplasma hominis                                 | 0     | 0    | 0    | 0    | 0     | 0    | 0     | 0    | 0    | 0    | 0    | 0     | 0     | 0    | 0    | 0    | 0    | 0     | 0     | 0     | 0    | 0    |
| Granulicatella elegans                             | 0     | 0    | 0    | 0    | 0     | 0    | 0     | 0    | 0    | 112  | 0    | 0     | 0     | 0    | 0    | 0    | 0    | 0     | 66    | 0     | 0    | 0    |
| Ezakiella                                          | 0     | 0    | 0    | 0    | 0     | 0    | 0     | 0    | 0    | 0    | 0    | 0     | 0     | 0    | 0    | 0    | 0    | 0     | 0     | 0     | 0    | 0    |
| Shigella/Escherichia                               | 0     | 0    | 0    | 0    | 0     | 0    | 0     | 0    | 0    | 0    | 0    | 0     | 0     | 0    | 0    | 0    | 0    | 0     | 0     | 0     | 0    | 0    |
| Streptococcus salivarius                           | 1572  | 0    | 0    | 0    | 0     | 0    | 0     | 388  | 0    | 0    | 0    | 0     | 0     | 0    | 0    | 0    | 0    | 0     | 0     | 0     | 0    | 0    |
| Actinomyces turicensis                             | 0     | 0    | 0    | 0    | 0     | 0    | 52    | 0    | 0    | 0    | 0    | 0     | 0     | 0    | 0    | 0    | 131  | 0     | 0     | 0     | 0    | 0    |
| Prevotella corporis                                | 0     | 0    | 0    | 0    | 0     | 0    | 0     | 0    | 0    | 0    | 0    | 0     | 0     | 0    | 0    | 0    | 0    | 0     | 0     | 0     | 0    | 0    |
| Corynebacterium simulans                           | 0     | 0    | 0    | 0    | 349   | 0    | 0     | 0    | 0    | 0    | 0    | 0     | 0     | 0    | 0    | 0    | 88   | 0     | 0     | 0     | 0    | 0    |
| Fusobacterium equinum                              | 0     | 0    | 0    | 0    | 0     | 0    | 0     | 0    | 0    | 0    | 0    | 0     | 0     | 0    | 0    | 0    | 0    | 0     | 0     | 0     | 0    | 0    |
| Corynebacterium                                    | 0     | 0    | 0    | 42   | 0     | 0    | 0     | 169  | 0    | 0    | 0    | 0     | 0     | 698  | 0    | 368  | 38   | 0     | 0     | 0     | 0    | 43   |
| Staphylococcus haemolyticus                        | 0     | 0    | 0    | 251  | 859   | 79   | 0     | 33   | 0    | 0    | 110  | 0     | 0     | 0    | 0    | 0    | 42   | 0     | 0     | 0     | 0    | 0    |
| Gemella asaccharolytica                            | 0     | 0    | 0    | 0    | 0     | 0    | 0     | 0    | 0    | 0    | 0    | 0     | 0     | 0    | 0    | 0    | 0    | 0     | 0     | 0     | 0    | 0    |
| Peptoniphilus                                      | 0     | 0    | 0    | 0    | 0     | 0    | 182   | 0    | 0    | 0    | 0    | 0     | 0     | 0    | 0    | 0    | 0    | 46    | 0     | 0     | 0    | 0    |
| Corynebacterium hadale/imitans                     | 101   | 0    | 0    | 0    | 0     | 90   | 59    | 0    | 167  | 0    | 37   | 124   | 0     | 0    | 0    | 0    | 0    | 0     | 0     | 0     | 0    | 0    |
| Eggerthella sp. type 1 (species)                   | 0     | 0    | 0    | 0    | 0     | 0    | 0     | 0    | 0    | 0    | 0    | 0     | 0     | 0    | 0    | 0    | 0    | 0     | 0     | 0     | 0    | 0    |
| Prevotella disiens                                 | 0     | 0    | 0    | 149  | 0     | 0    | 0     | 0    | 0    | 0    | 0    | 0     | 0     | 0    | 0    | 0    | 0    | 0     | 0     | 0     | 0    | 0    |
| Peptoniphilus lacrimalis                           | 0     | 0    | 0    | 0    | 0     | 0    | 0     | 0    | 0    | 0    | 0    | 0     | 0     | 0    | 0    | 0    | 0    | 0     | 0     | 0     | 0    | 0    |
| Anaerococcus vaginalis                             | 0     | 0    | 0    | 0    | 0     | 0    | 504   | 0    | 0    | 0    | 0    | 0     | 0     | 0    | 0    | 0    | 28   | 0     | 0     | 0     | 0    | 0    |
| Facklamia hominis                                  | 0     | 0    | 0    | 0    | 0     | 0    | 36    | 0    | 0    | 0    | 0    | 0     | 0     | 29   | 0    | 0    | 0    | 0     | 0     | 0     | 0    | 0    |
| Prevotella amnii                                   | 0     | 0    | 0    | 0    | 0     | 0    | 0     | 0    | 0    | 0    | 0    | 0     | 0     | 0    | 0    | 0    | 0    | 0     | 0     | 0     | 0    | 0    |
| Campylobacter ureolyticus                          | 0     | 0    | 0    | 0    | 0     | 0    | 0     | 0    | 0    | 0    | 0    | 0     | 0     | 27   | 0    | 0    | 196  | 0     | 0     | 0     | 0    | 0    |
| BVAB2 (species)                                    | 0     | 0    | 0    | 0    | 0     | 0    | 0     | 0    | 0    | 0    | 0    | 0     | 0     | 0    | 0    | 0    | 0    | 0     | 0     | 0     | 0    | 0    |
| Haemophilus                                        | 0     | 0    | 0    | 0    | 0     | 0    | 0     | 0    | 0    | 0    | 0    | 0     | 0     | 0    | 0    | 0    | 0    | 0     | 0     | 0     | 0    | 0    |
| Anaerococcus hydrogenalis/rubeifantidis            | 0     | 100  | 0    | 0    | 0     | 0    | 0     | 33   | 0    | 0    | 0    | 0     | 0     | 0    | 0    | 0    | 72   | 0     | 0     | 45    | 0    | 0    |
| Anaerococcus mediterraneensis                      | 0     | 0    | 0    | 0    | 0     | 0    | 79    | 0    | 0    | 0    | 0    | 0     | 0     | 0    | 0    | 0    | 0    | 0     | 62    | 0     | 0    | 0    |
| Dialister sp. type 2                               | 0     | 0    | 0    | 0    | 0     | 0    | 0     | 0    | 0    | 0    | 0    | 0     | 0     | 0    | 0    | 0    | 0    | 0     | 0     | 0     | 0    | 0    |
| Dialister microaerophilus                          | 0     | 0    | 0    | 83   | 0     | 0    | 0     | 0    | 0    | 0    | 0    | 0     | 0     | 0    | 0    | 0    | 0    | 0     | 0     | 0     | 0    | 0    |
| Corynebacterium amycolatum                         | 0     | 0    | 0    | 0    | 0     | 0    | 0     | 0    | 0    | 0    | 0    | 0     | 0     | 0    | 0    | 0    | 46   | 0     | 0     | 0     | 0    | 0    |
| Ureaplasma                                         | 0     | 0    | 0    | 0    | 0     | 0    | 0     | 0    | 0    | 0    | 0    | 0     | 0     | 0    | 0    | 0    | 0    | 0     | 0     | 0     | 0    | 0    |
| Enterococcus faecalis                              | 0     | 0    | 0    | 0    | 0     | 0    | 0     | 50   | 0    | 0    | 0    | 0     | 0     | 0    | 0    | 0    | 0    | 0     | 0     | 0     | 0    | 0    |
| Parvimonas                                         | 0     | 0    | 0    | 0    | 0     | 0    | 0     | 0    | 0    | 0    | 0    | 0     | 0     | 0    | 0    | 0    | 0    | 0     | 0     | 0     | 0    | 0    |
| Haemophilus pittmaniae                             | 0     | 0    | 0    | 0    | 0     | 0    | 0     | 0    | 0    | 0    | 0    | 0     | 0     | 0    | 0    | 0    | 0    | 0     | 0     | 0     | 0    | 0    |
| Actinomyces neuii                                  | 0     | 0    | 0    | 0    | 63    | 0    | 0     | 0    | 0    | 0    | 0    | 0     | 0     | 0    | 0    | 0    | 361  | 0     | 0     | 0     | 0    | 0    |

# Samples S378 - S410

| Species                                                | S378 | S379 | S380 | S382 | S384 | S385 | S386 | S388 | S390 | S391 | S392 | S394 | S396 | S397  | S399 | S400 | S401 | S404 | S405 | S407 | S408 | S410 |
|--------------------------------------------------------|------|------|------|------|------|------|------|------|------|------|------|------|------|-------|------|------|------|------|------|------|------|------|
| Peptoniphilus rhintidis                                | 0    | 0    | 0    | 0    | 0    | 0    | 0    | 86   | 0    | 0    | 0    | 0    | 0    | 0     | 0    | 0    | 0    | 0    | 0    | 0    | 0    | 0    |
| Anaerococcus senegalensis                              | 0    | 0    | 0    | 0    | 35   | 0    | 0    | 37   | 0    | 0    | 0    | 0    | 0    | 0     | 0    | 0    | 135  | 0    | 0    | 0    | 0    | 0    |
| Peptostreptococcus anaerobius                          | 0    | 0    | 0    | 0    | 0    | 0    | 0    | 0    | 0    | 0    | 0    | 0    | 0    | 0     | 0    | 0    | 0    | 41   | 0    | 0    | 0    | 0    |
| Dialister propionificaciens                            | 0    | 0    | 0    | 0    | 0    | 0    | 0    | 0    | 0    | 0    | 0    | 0    | 0    | 0     | 0    | 0    | 133  | 0    | 0    | 0    | 0    | 0    |
| Peptoniphilus harei                                    | 0    | 0    | 0    | 0    | 0    | 0    | 0    | 227  | 0    | 0    | 0    | 0    | 0    | 0     | 0    | 0    | 45   | 0    | 0    | 0    | 0    | 0    |
| Negativococcus succinivorans                           | 0    | 0    | 0    | 0    | 0    | 0    | 0    | 0    | 0    | 0    | 0    | 0    | 36   | 0     | 0    | 0    | 131  | 0    | 0    | 0    | 0    | 0    |
| Parvimonas micra                                       | 0    | 0    | 0    | 0    | 0    | 0    | 0    | 0    | 0    | 0    | 0    | 0    | 0    | 0     | 0    | 0    | 0    | 0    | 0    | 0    | 0    | 0    |
| Actinomyces ihumii                                     | 0    | 0    | 0    | 0    | 0    | 0    | 0    | 0    | 0    | 0    | 0    | 0    | 34   | 0     | 0    | 0    | 99   | 0    | 0    | 0    | 0    | 0    |
| Actinotignum timonense                                 | 0    | 0    | 0    | 202  | 0    | 0    | 0    | 0    | 0    | 0    | 0    | 0    | 0    | 0     | 0    | 0    | 0    | 0    | 0    | 0    | 0    | 0    |
| Fenollaria                                             | 0    | 0    | 0    | 0    | 0    | 0    | 0    | 0    | 0    | 0    | 0    | 0    | 0    | 0     | 0    | 0    | 0    | 0    | 0    | 0    | 0    | 0    |
| Fusobacterium massiliense                              | 0    | 0    | 0    | 0    | 0    | 0    | 0    | 0    | 0    | 0    | 0    | 0    | 0    | 0     | 0    | 0    | 0    | 0    | 0    | 0    | 0    | 0    |
| Actinobaculum massiliense                              | 0    | 0    | 0    | 0    | 0    | 0    | 0    | 57   | 0    | 0    | 0    | 0    | 0    | 0     | 0    | 0    | 0    | 0    | 0    | 0    | 0    | 0    |
| Peptoniphilus coxii                                    | 0    | 0    | 0    | 0    | 0    | 0    | 104  | 0    | 0    | 0    | 0    | 0    | 0    | 0     | 0    | 0    | 743  | 0    | 0    | 0    | 0    | 0    |
| Staphylococcus lugdunensis                             | 0    | 0    | 0    | 0    | 1598 | 44   | 0    | 0    | 0    | 0    | 0    | 38   | 0    | 0     | 0    | 0    | 0    | 0    | 0    | 0    | 0    | 0    |
| Dermabacter                                            | 0    | 0    | 0    | 171  | 0    | 38   | 32   | 0    | 239  | 0    | 0    | 37   | 0    | 0     | 0    | 0    | 0    | 0    | 0    | 0    | 0    | 0    |
| Alloscardovia omnicolens                               | 0    | 0    | 0    | 0    | 0    | 0    | 0    | 0    | 0    | 0    | 0    | 0    | 0    | 0     | 0    | 0    | 0    | 0    | 0    | 0    | 0    | 0    |
| Varibaculum cambriense                                 | 0    | 0    | 0    | 0    | 0    | 0    | 0    | 0    | 0    | 0    | 0    | 0    | 0    | 0     | 0    | 0    | 491  | 0    | 0    | 0    | 0    | 0    |
| Streptococcus urinalis                                 | 0    | 0    | 0    | 0    | 0    | 0    | 0    | 0    | 0    | 0    | 0    | 0    | 0    | 54    | 0    | 0    | 0    | 0    | 0    | 0    | 0    | 1748 |
| Corynebacterium appendicis                             | 0    | 0    | 0    | 0    | 0    | 0    | 0    | 0    | 0    | 0    | 0    | 0    | 0    | 0     | 0    | 0    | 0    | 0    | 0    | 0    | 0    | 0    |
| Actinotignum schaalii                                  | 0    | 0    | 0    | 182  | 0    | 0    | 0    | 0    | 0    | 0    | 0    | 0    | 0    | 0     | 0    | 0    | 158  | 0    | 0    | 0    | 0    | 0    |
| Corynebacterium timonense                              | 0    | 0    | 0    | 0    | 0    | 0    | 0    | 31   | 0    | 0    | 0    | 0    | 0    | 0     | 0    | 0    | 0    | 0    | 0    | 0    | 0    | 0    |
| Gemella                                                | 0    | 0    | 0    | 0    | 0    | 0    | 0    | 0    | 0    | 0    | 0    | 0    | 0    | 0     | 0    | 0    | 0    | 0    | 0    | 0    | 0    | 0    |
| Klebsiella aerogenes/Enterobacter asburiae             | 0    | 0    | 0    | 0    | 0    | 0    | 0    | 0    | 0    | 0    | 0    | 0    | 0    | 0     | 0    | 0    | 0    | 0    | 0    | 0    | 0    | 0    |
| Fusobacterium periodonticum                            | 0    | 0    | 0    | 0    | 0    | 0    | 0    | 0    | 0    | 0    | 0    | 0    | 0    | 0     | 0    | 0    | 0    | 0    | 0    | 0    | 0    | 0    |
| Veillonella dispar                                     | 0    | 0    | 0    | 0    | 0    | 0    | 0    | 89   | 0    | 0    | 0    | 0    | 0    | 0     | 0    | 0    | 141  | 0    | 0    | 0    | 0    | 0    |
| Prevotella colorans                                    | 0    | 0    | 0    | 0    | 0    | 0    | 0    | 0    | 0    | 0    | 0    | 0    | 0    | 0     | 0    | 0    | 0    | 0    | 0    | 0    | 0    | 0    |
| Candidatus Peptoniphilus massiliensis                  | 0    | 0    | 0    | 0    | 0    | 0    | 35   | 0    | 0    | 0    | 0    | 0    | 0    | 0     | 0    | 0    | 27   | 0    | 0    | 0    | 0    | 0    |
| Eremococcus                                            | 58   | 0    | 0    | 0    | 0    | 0    | 37   | 0    | 159  | 0    | 0    | 28   | 0    | 0     | 0    | 0    | 0    | 0    | 0    | 0    | 0    | 0    |
| Varibaculum anthropi                                   | 0    | 0    | 0    | 0    | 0    | 0    | 0    | 0    | 0    | 0    | 0    | 0    | 0    | 0     | 0    | 0    | 0    | 0    | 0    | 0    | 0    | 0    |
| Propionimicrobium lymphophilum                         | 0    | 0    | 0    | 327  | 0    | 0    | 0    | 0    | 0    | 0    | 0    | 0    | 52   | 0     | 0    | 0    | 0    | 0    | 0    | 0    | 0    | 0    |
| Streptococcus dysgalactiae                             | 0    | 0    | 0    | 0    | 0    | 0    | 0    | 0    | 0    | 0    | 0    | 0    | 0    | 13475 | 0    | 0    | 0    | 0    | 0    | 0    | 0    | 0    |
| Negativococcus                                         | 0    | 0    | 0    | 0    | 0    | 0    | 0    | 0    | 0    | 0    | 0    | 0    | 0    | 0     | 0    | 210  | 0    | 0    | 0    | 0    | 0    | 0    |
| Porphyromonas somerae                                  | 0    | 0    | 0    | 0    | 0    | 0    | 0    | 0    | 0    | 0    | 0    | 0    | 0    | 0     | 0    | 0    | 0    | 0    | 0    | 0    | 0    | 0    |
| Corynebacterium jeikeium                               | 0    | 0    | 0    | 0    | 0    | 0    | 0    | 0    | 0    | 0    | 0    | 0    | 0    | 0     | 0    | 0    | 0    | 0    | 0    | 0    | 0    | 0    |
| Mobiluncus curtisii                                    | 0    | 0    | 0    | 0    | 0    | 0    | 0    | 0    | 0    | 0    | 0    | 0    | 0    | 0     | 0    | 0    | 481  | 0    | 0    | 0    | 0    | 0    |
| Porphyromonas uenonis                                  | 0    | 0    | 0    | 0    | 0    | 0    | 0    | 0    | 0    | 0    | 0    | 0    | 0    | 0     | 0    | 0    | 0    | 0    | 0    | 0    | 0    | 0    |
| Aerococcus urinae                                      | 0    | 0    | 0    | 259  | 0    | 0    | 0    | 52   | 0    | 0    | 0    | 0    | 0    | 0     | 0    | 0    | 0    | 0    | 0    | 0    | 0    | 0    |
| Corynebacterium mycetoides                             | 0    | 0    | 0    | 0    | 0    | 0    | 0    | 0    | 0    | 0    | 0    | 0    | 0    | 0     | 0    | 0    | 0    | 0    | 0    | 0    | 0    | 0    |
| Cutibacterium acnes                                    | 0    | 0    | 0    | 0    | 0    | 0    | 0    | 41   | 0    | 0    | 0    | 0    | 0    | 0     | 0    | 0    | 0    | 0    | 0    | 0    | 0    | 0    |
| Urinacoccus massiliensis                               | 0    | 0    | 0    | 0    | 0    | 0    | 46   | 0    | 0    | 0    | 0    | 0    | 0    | 0     | 0    | 0    | 0    | 0    | 0    | 0    | 0    | 0    |
| Campylobacter hominis                                  | 0    | 0    | 0    | 0    | 0    | 0    | 0    | 0    | 0    | 0    | 0    | 0    | 0    | 0     | 0    | 0    | 124  | 0    | 0    | 0    | 0    | 0    |
| Staphylococcus capitis/caprae                          | 0    | 0    | 0    | 0    | 0    | 48   | 0    | 0    | 0    | 0    | 0    | 0    | 0    | 0     | 0    | 0    | 0    | 0    | 0    | 0    | 0    | 0    |
| Sneathia                                               | 0    | 0    | 0    | 0    | 0    | 0    | 0    | 0    | 0    | 0    | 0    | 0    | 0    | 0     | 0    | 0    | 0    | 0    | 0    | 0    | 0    | 0    |
| Prevotella jejuni                                      | 0    | 0    | 0    | 0    | 0    | 0    | 0    | 0    | 0    | 0    | 0    | 0    | 0    | 0     | 0    | 0    | 0    | 45   | 0    | 0    | 0    | 0    |
| Varibaculum                                            | 0    | 0    | 0    | 0    | 0    | 0    | 0    | 0    | 0    | 0    | 0    | 0    | 0    | 0     | 0    | 0    | 0    | 0    | 0    | 0    | 0    | 0    |
| Corynebacterium striatum                               | 0    | 0    | 0    | 0    | 0    | 0    | 0    | 0    | 0    | 0    | 0    | 0    | 0    | 0     | 0    | 0    | 0    | 0    | 0    | 0    | 0    | 0    |
| Jonquetella anthropi                                   | 0    | 0    | 0    | 0    | 0    | 0    | 0    | 0    | 0    | 0    | 0    | 0    | 0    | 0     | 0    | 0    | 0    | 0    | 0    | 0    | 0    | 0    |
| Peptoniphilus koeoeneinae                              | 0    | 0    | 0    | 0    | 0    | 0    | 0    | 0    | 0    | 0    | 0    | 0    | 0    | 0     | 0    | 0    | 0    | 0    | 0    | 0    | 0    | 0    |
| Bifidobacterium longum                                 | 0    | 0    | 0    | 0    | 0    | 0    | 0    | 0    | 0    | 0    | 0    | 0    | 0    | 0     | 0    | 0    | 0    | 0    | 0    | 0    | 0    | 0    |
| Helicobacter                                           | 0    | 0    | 0    | 0    | 0    | 0    | 0    | 0    | 0    | 0    | 0    | 0    | 0    | 0     | 0    | 0    | 0    | 0    | 0    | 0    | 0    | 0    |
| Lawsonella clevelandensis                              | 0    | 0    | 0    | 0    | 0    | 0    | 0    | 0    | 0    | 0    | 0    | 0    | 0    | 0     | 0    | 0    | 0    | 0    | 0    | 0    | 0    | 0    |
| Escherichia coli/fergusonii                            | 0    | 0    | 0    | 0    | 0    | 0    | 0    | 0    | 0    | 0    | 0    | 0    | 0    | 0     | 0    | 0    | 0    | 0    | 0    | 0    | 0    | 0    |
| Fusobacterium nucleatum                                | 0    | 0    | 0    | 0    | 0    | 0    | 591  | 0    | 0    | 0    | 0    | 0    | 0    | 0     | 0    | 0    | 0    | 0    | 0    | 0    | 0    | 0    |
| Porphyromonas asaccharolytica                          | 0    | 0    | 0    | 0    | 0    | 0    | 0    | 0    | 0    | 0    | 0    | 0    | 0    | 0     | 0    | 0    | 0    | 0    | 0    | 0    | 0    | 0    |
| Anaerococcus octavius                                  | 0    | 0    | 0    | 0    | 0    | 0    | 0    | 0    | 0    | 0    | 0    | 0    | 0    | 0     | 0    | 0    | 0    | 0    | 0    | 0    | 0    | 0    |
| Fusobacterium                                          | 0    | 0    | 0    | 0    | 0    | 0    | 0    | 0    | 0    | 0    | 0    | 0    | 0    | 0     | 0    | 0    | 0    | 0    | 0    | 0    | 0    | 0    |
| Corynebacterium phoceense                              | 0    | 0    | 0    | 0    | 0    | 0    | 211  | 0    | 0    | 0    | 0    | 0    | 0    | 0     | 0    | 0    | 0    | 0    | 0    | 0    | 0    | 0    |
| Ruminococcus                                           | 0    | 0    | 0    | 0    | 0    | 0    | 0    | 0    | 0    | 0    | 0    | 0    | 0    | 0     | 0    | 0    | 0    | 0    | 0    | 0    | 0    | 0    |
| Arcanobacterium                                        | 0    | 0    | 0    | 0    | 0    | 0    | 0    | 0    | 0    | 0    | 0    | 0    | 0    | 0     | 0    | 0    | 0    | 0    | 0    | 0    | 0    | 0    |
| Khoudiadiopia                                          | 0    | 0    | 0    | 0    | 0    | 0    | 0    | 0    | 0    | 0    | 0    | 0    | 0    | 0     | 0    | 0    | 0    | 0    | 0    | 0    | 0    | 0    |
| Atopobium deltae                                       | 0    | 0    | 0    | 0    | 0    | 0    | 0    | 0    | 0    | 0    | 0    | 0    | 0    | 0     | 0    | 0    | 0    | 0    | 0    | 0    | 0    | 0    |
| Haemophilus parahaemolyticus                           | 0    | 0    | 0    | 0    | 0    | 0    | 0    | 0    | 0    | 0    | 0    | 0    | 0    | 0     | 0    | 0    | 0    | 0    | 0    | 0    | 0    | 0    |
| Howardella                                             | 0    | 0    | 0    | 0    | 0    | 0    | 0    | 0    | 0    | 0    | 0    | 0    | 0    | 0     | 0    | 0    | 0    | 0    | 0    | 0    | 0    | 0    |
| Prevotella buccalis                                    | 0    | 0    | 0    | 0    | 0    | 0    | 203  | 0    | 0    | 0    | 0    | 0    | 0    | 0     | 0    | 0    | 0    | 0    | 0    | 0    | 0    | 0    |
| Corynebacterium auris                                  | 0    | 0    | 0    | 0    | 0    | 0    | 0    | 86   | 0    | 0    | 0    | 0    | 0    | 0     | 0    | 0    | 0    | 0    | 0    | 0    | 0    | 0    |
| Candidatus Mycoplasma gireddii                         | 0    | 0    | 0    | 0    | 0    | 0    | 0    | 0    | 0    | 0    | 0    | 0    | 0    | 0     | 0    | 0    | 0    | 0    | 0    | 0    | 0    | 0    |
| Alloicoccus                                            | 0    | 0    | 0    | 0    | 0    | 0    | 0    | 0    | 0    | 0    | 0    | 0    | 0    | 0     | 0    | 0    | 0    | 0    | 0    | 0    | 0    | 0    |
| Corynebacterium founierii/mucifaciens/ureicelerivorans | 0    | 0    | 0    | 0    | 0    | 0    | 0    | 0    | 0    | 0    | 0    | 0    | 0    | 0     | 0    | 0    | 0    | 0    | 0    | 0    | 0    | 0    |
| Corynebacterium auris/timonense                        | 0    | 0    | 0    | 0    | 0    | 0    | 0    | 0    | 0    | 0    | 0    | 0    | 0    | 0     | 0    | 0    | 0    | 0    | 0    | 0    | 0    | 0    |
| Veillonella ratti/seminalis                            | 0    | 0    | 0    | 0    | 0    | 0    | 0    | 0    | 0    | 0    | 0    | 0    | 0    | 0     | 0    | 0    | 90   | 0    | 0    | 0    | 0    | 0    |

# Samples S378 - S410

| Species                                    | S378 | S379 | S380 | S382 | S384 | S385 | S386 | S388 | S390 | S391 | S392 | S394 | S396 | S397 | S399 | S400 | S401 | S404 | S405 | S407 | S408 | S410 |
|--------------------------------------------|------|------|------|------|------|------|------|------|------|------|------|------|------|------|------|------|------|------|------|------|------|------|
| Lactobacillus gasserii                     | 0    | 0    | 0    | 0    | 0    | 0    | 0    | 0    | 0    | 0    | 0    | 0    | 0    | 0    | 0    | 0    | 0    | 0    | 0    | 0    | 0    | 0    |
| Tissierella                                | 0    | 0    | 0    | 0    | 0    | 0    | 0    | 0    | 0    | 0    | 0    | 0    | 0    | 0    | 0    | 0    | 0    | 0    | 0    | 0    | 0    | 0    |
| Granulicatella adiacens                    | 0    | 0    | 0    | 0    | 0    | 0    | 0    | 0    | 108  | 0    | 0    | 0    | 0    | 0    | 0    | 0    | 0    | 0    | 0    | 0    | 0    | 0    |
| Sutterella                                 | 0    | 0    | 0    | 0    | 0    | 0    | 0    | 0    | 0    | 0    | 0    | 0    | 0    | 0    | 0    | 0    | 0    | 0    | 0    | 0    | 0    | 0    |
| Prevotella nanceiensis                     | 0    | 0    | 0    | 0    | 0    | 0    | 0    | 0    | 0    | 0    | 0    | 0    | 0    | 0    | 0    | 0    | 0    | 0    | 0    | 0    | 0    | 0    |
| Lactobacillus jensenii                     | 0    | 0    | 0    | 0    | 0    | 0    | 0    | 0    | 0    | 0    | 0    | 0    | 0    | 0    | 0    | 0    | 0    | 0    | 0    | 0    | 0    | 0    |
| Lactobacillus crispatus                    | 0    | 0    | 0    | 0    | 0    | 0    | 0    | 0    | 0    | 0    | 0    | 0    | 0    | 0    | 0    | 0    | 0    | 0    | 0    | 0    | 0    | 0    |
| Candidate Division TM7 vaginal (genus)     | 0    | 0    | 0    | 0    | 0    | 0    | 0    | 0    | 0    | 0    | 0    | 0    | 0    | 0    | 0    | 0    | 0    | 0    | 0    | 0    | 0    | 0    |
| Candidatus Saccharimonas                   | 0    | 0    | 0    | 0    | 0    | 0    | 0    | 0    | 0    | 0    | 0    | 0    | 0    | 0    | 0    | 0    | 0    | 0    | 0    | 0    | 0    | 0    |
| Peptococcus niger                          | 0    | 0    | 0    | 0    | 0    | 0    | 0    | 0    | 0    | 0    | 0    | 0    | 0    | 0    | 0    | 0    | 0    | 0    | 0    | 0    | 0    | 0    |
| Neisseria flavescens/perflava              | 0    | 0    | 0    | 0    | 0    | 0    | 0    | 0    | 0    | 0    | 0    | 0    | 0    | 0    | 0    | 0    | 0    | 0    | 0    | 0    | 0    | 0    |
| Gemella sanguinis                          | 0    | 0    | 0    | 0    | 0    | 0    | 0    | 0    | 0    | 0    | 0    | 0    | 0    | 0    | 0    | 0    | 0    | 0    | 0    | 0    | 0    | 0    |
| Porphyromonas                              | 0    | 0    | 0    | 0    | 0    | 0    | 0    | 0    | 0    | 0    | 0    | 0    | 0    | 0    | 0    | 0    | 0    | 0    | 0    | 0    | 0    | 0    |
| Prevotella                                 | 0    | 0    | 0    | 0    | 0    | 0    | 0    | 0    | 0    | 0    | 0    | 0    | 0    | 0    | 0    | 0    | 0    | 0    | 0    | 0    | 0    | 0    |
| Corynebacterium thomssenii                 | 0    | 0    | 0    | 0    | 0    | 0    | 0    | 0    | 0    | 0    | 0    | 0    | 0    | 0    | 0    | 0    | 0    | 0    | 0    | 0    | 0    | 0    |
| Lachnospiraceae                            | 0    | 0    | 0    | 0    | 0    | 0    | 0    | 0    | 0    | 0    | 0    | 0    | 0    | 0    | 0    | 0    | 0    | 0    | 0    | 0    | 0    | 0    |
| Corynebacterium tuberculoostearicum        | 0    | 0    | 0    | 0    | 0    | 0    | 0    | 0    | 0    | 0    | 0    | 0    | 0    | 0    | 0    | 0    | 0    | 0    | 0    | 0    | 0    | 0    |
| Dermabacter hominis                        | 0    | 0    | 0    | 0    | 0    | 0    | 0    | 0    | 0    | 0    | 0    | 0    | 0    | 0    | 0    | 0    | 0    | 0    | 0    | 0    | 0    | 0    |
| Veillonella rogosae                        | 0    | 0    | 0    | 0    | 0    | 0    | 0    | 0    | 0    | 0    | 0    | 0    | 0    | 0    | 0    | 0    | 0    | 0    | 0    | 0    | 0    | 0    |
| Actinomyces hongkongensis                  | 0    | 0    | 0    | 0    | 0    | 0    | 0    | 0    | 0    | 0    | 0    | 0    | 0    | 0    | 0    | 0    | 0    | 0    | 0    | 0    | 0    | 0    |
| Veillonella parvula/rogosae                | 0    | 0    | 0    | 0    | 0    | 0    | 0    | 0    | 0    | 0    | 0    | 0    | 0    | 0    | 0    | 0    | 0    | 0    | 0    | 0    | 0    | 0    |
| Anaerococcus provencensis                  | 0    | 0    | 0    | 0    | 0    | 0    | 0    | 0    | 0    | 0    | 0    | 0    | 0    | 0    | 0    | 0    | 0    | 0    | 0    | 0    | 0    | 0    |
| Porphyromonas sp. type 1                   | 0    | 0    | 0    | 0    | 0    | 0    | 0    | 0    | 0    | 0    | 0    | 0    | 0    | 0    | 0    | 0    | 0    | 0    | 0    | 0    | 0    | 0    |
| Brevibacterium paucivorans                 | 0    | 0    | 0    | 0    | 0    | 0    | 0    | 0    | 0    | 0    | 0    | 0    | 0    | 0    | 0    | 0    | 0    | 0    | 0    | 0    | 0    | 0    |
| Peptostreptococcus                         | 0    | 0    | 0    | 0    | 0    | 0    | 0    | 0    | 0    | 0    | 0    | 0    | 0    | 0    | 0    | 0    | 0    | 0    | 0    | 0    | 0    | 0    |
| Facklamia languida                         | 0    | 0    | 0    | 0    | 0    | 0    | 0    | 0    | 0    | 0    | 0    | 0    | 0    | 0    | 0    | 0    | 0    | 0    | 0    | 0    | 0    | 0    |
| Streptobacillus                            | 0    | 0    | 0    | 0    | 0    | 0    | 0    | 0    | 0    | 0    | 0    | 0    | 0    | 0    | 0    | 0    | 0    | 0    | 0    | 0    | 0    | 0    |
| Gemella haemolysans                        | 0    | 0    | 0    | 0    | 0    | 0    | 0    | 0    | 0    | 0    | 0    | 0    | 0    | 0    | 0    | 0    | 0    | 0    | 0    | 0    | 0    | 0    |
| Haemophilus sputorum                       | 0    | 0    | 0    | 0    | 0    | 0    | 0    | 0    | 0    | 0    | 0    | 0    | 0    | 0    | 0    | 44   | 0    | 0    | 0    | 0    | 0    | 0    |
| Actinotignum urinale                       | 0    | 0    | 0    | 0    | 0    | 0    | 0    | 0    | 0    | 0    | 0    | 0    | 0    | 0    | 0    | 0    | 0    | 0    | 0    | 0    | 0    | 0    |
| Dialister pneumosintes                     | 0    | 0    | 0    | 0    | 0    | 0    | 0    | 0    | 0    | 0    | 0    | 0    | 0    | 0    | 0    | 0    | 0    | 0    | 0    | 0    | 0    | 0    |
| Treponema pallidum                         | 0    | 0    | 0    | 0    | 0    | 0    | 0    | 0    | 0    | 0    | 0    | 0    | 0    | 0    | 0    | 0    | 0    | 0    | 0    | 0    | 0    | 0    |
| Porphyromonas bennonis                     | 0    | 0    | 0    | 0    | 0    | 0    | 0    | 0    | 0    | 0    | 0    | 0    | 0    | 0    | 0    | 0    | 0    | 0    | 0    | 0    | 0    | 0    |
| Bergeyella                                 | 0    | 0    | 0    | 0    | 0    | 0    | 0    | 0    | 0    | 0    | 0    | 0    | 0    | 0    | 0    | 0    | 0    | 0    | 0    | 0    | 0    | 0    |
| Actinotignum schaalii/timonense            | 0    | 0    | 0    | 0    | 0    | 0    | 0    | 0    | 0    | 0    | 0    | 0    | 0    | 168  | 0    | 0    | 0    | 0    | 0    | 0    | 0    | 0    |
| Klebsiella aerogenes/Kluyvera cryocrescens | 0    | 0    | 0    | 0    | 0    | 0    | 0    | 0    | 0    | 0    | 0    | 0    | 0    | 0    | 0    | 0    | 0    | 0    | 0    | 0    | 0    | 0    |
| Rothia mucilaginosa                        | 25   | 0    | 0    | 0    | 0    | 0    | 0    | 0    | 219  | 0    | 0    | 0    | 0    | 0    | 0    | 0    | 0    | 0    | 0    | 0    | 0    | 0    |
| Solobacterium moorei                       | 0    | 0    | 0    | 0    | 0    | 0    | 0    | 0    | 0    | 0    | 0    | 0    | 0    | 0    | 0    | 0    | 0    | 0    | 0    | 0    | 0    | 0    |
| Mageeibacillus indolicus                   | 0    | 0    | 0    | 0    | 0    | 0    | 0    | 0    | 0    | 0    | 0    | 0    | 0    | 0    | 0    | 0    | 0    | 0    | 0    | 0    | 0    | 0    |
| Serratia urelytica                         | 0    | 0    | 0    | 0    | 0    | 0    | 0    | 0    | 0    | 0    | 0    | 0    | 0    | 0    | 0    | 0    | 0    | 0    | 0    | 0    | 0    | 0    |
| Peptoniphilus obesi                        | 0    | 0    | 0    | 0    | 0    | 0    | 0    | 0    | 0    | 0    | 0    | 0    | 0    | 0    | 0    | 0    | 0    | 0    | 0    | 0    | 0    | 0    |
| Peptoniphilus harei/phoceensis             | 0    | 0    | 0    | 0    | 0    | 0    | 0    | 0    | 0    | 0    | 0    | 0    | 0    | 0    | 0    | 0    | 0    | 0    | 0    | 0    | 0    | 0    |
| Corynebacterium atypicum                   | 0    | 0    | 0    | 0    | 0    | 0    | 0    | 0    | 0    | 0    | 0    | 0    | 0    | 0    | 0    | 0    | 0    | 0    | 0    | 35   | 0    | 0    |
| Atopobium minutum                          | 0    | 0    | 0    | 0    | 0    | 0    | 0    | 0    | 0    | 0    | 0    | 0    | 0    | 0    | 0    | 0    | 0    | 0    | 0    | 0    | 0    | 0    |
| Corynebacterium genitalium                 | 0    | 0    | 0    | 44   | 0    | 0    | 0    | 0    | 0    | 0    | 0    | 0    | 0    | 0    | 0    | 0    | 0    | 0    | 0    | 0    | 0    | 0    |
| Bifidobacterium tsurumiense                | 0    | 0    | 0    | 0    | 0    | 0    | 0    | 0    | 0    | 0    | 0    | 0    | 0    | 0    | 0    | 0    | 0    | 0    | 0    | 0    | 0    | 0    |
| Micrococcus                                | 0    | 0    | 0    | 0    | 0    | 0    | 0    | 0    | 166  | 0    | 0    | 0    | 0    | 0    | 0    | 0    | 0    | 0    | 0    | 0    | 0    | 0    |
| Megasphaera genomsp. type_1                | 0    | 0    | 0    | 0    | 0    | 0    | 0    | 0    | 0    | 0    | 0    | 0    | 0    | 0    | 0    | 0    | 0    | 0    | 0    | 0    | 0    | 0    |
| Enhydrobacter                              | 0    | 0    | 0    | 0    | 0    | 0    | 0    | 0    | 0    | 0    | 0    | 0    | 0    | 0    | 0    | 0    | 0    | 0    | 0    | 0    | 0    | 0    |
| Fastidiosipila sanguinis                   | 0    | 0    | 0    | 0    | 0    | 0    | 0    | 0    | 0    | 0    | 0    | 0    | 0    | 0    | 0    | 0    | 0    | 0    | 0    | 0    | 0    | 0    |
| Prevotellamassilia                         | 0    | 0    | 0    | 0    | 0    | 0    | 0    | 0    | 0    | 0    | 0    | 0    | 0    | 0    | 0    | 0    | 0    | 0    | 29   | 0    | 0    | 0    |
| Peptostreptococcaceae                      | 0    | 0    | 0    | 0    | 0    | 0    | 0    | 0    | 0    | 0    | 0    | 0    | 0    | 0    | 0    | 0    | 0    | 0    | 0    | 0    | 0    | 0    |
| Morganella morganii                        | 0    | 0    | 0    | 0    | 0    | 0    | 0    | 0    | 0    | 0    | 0    | 0    | 0    | 0    | 0    | 0    | 0    | 0    | 0    | 0    | 0    | 0    |
| Neofamilia                                 | 0    | 0    | 0    | 0    | 0    | 0    | 0    | 0    | 0    | 0    | 0    | 0    | 0    | 0    | 0    | 0    | 0    | 0    | 0    | 0    | 0    | 0    |
| Pseudoclavibacter bifida                   | 0    | 0    | 0    | 0    | 0    | 0    | 0    | 0    | 0    | 0    | 0    | 0    | 0    | 0    | 0    | 0    | 0    | 0    | 0    | 0    | 0    | 0    |
| Helcococcus                                | 0    | 0    | 0    | 0    | 0    | 0    | 0    | 0    | 0    | 0    | 0    | 0    | 0    | 0    | 0    | 0    | 0    | 0    | 0    | 0    | 0    | 0    |
| Brevibacterium ravenspurgense              | 0    | 0    | 0    | 0    | 0    | 0    | 0    | 0    | 0    | 0    | 0    | 0    | 0    | 0    | 0    | 0    | 0    | 0    | 0    | 0    | 0    | 0    |
| Moryella indoligenes                       | 0    | 0    | 0    | 0    | 0    | 0    | 0    | 0    | 0    | 0    | 0    | 0    | 0    | 0    | 0    | 0    | 0    | 0    | 0    | 0    | 0    | 0    |
| Olegusella massiliensis                    | 0    | 0    | 0    | 0    | 0    | 0    | 0    | 0    | 0    | 0    | 0    | 0    | 0    | 0    | 0    | 0    | 0    | 0    | 0    | 0    | 0    | 0    |
| Morococcus cerebrosus                      | 0    | 0    | 0    | 0    | 0    | 0    | 0    | 0    | 0    | 0    | 0    | 0    | 0    | 0    | 0    | 0    | 0    | 0    | 0    | 0    | 0    | 0    |
| Prevotella scopos                          | 0    | 0    | 0    | 0    | 0    | 0    | 0    | 0    | 0    | 0    | 0    | 0    | 0    | 0    | 0    | 0    | 0    | 0    | 0    | 0    | 0    | 0    |
| Veillonella parvula/tobetsuensis           | 0    | 0    | 0    | 0    | 0    | 0    | 0    | 0    | 0    | 0    | 0    | 0    | 0    | 0    | 0    | 0    | 0    | 0    | 0    | 0    | 0    | 0    |
| Moryella                                   | 0    | 0    | 0    | 0    | 0    | 0    | 0    | 0    | 0    | 0    | 0    | 0    | 0    | 0    | 0    | 0    | 0    | 0    | 0    | 0    | 0    | 0    |
| Atopobium parvulum                         | 0    | 0    | 0    | 0    | 0    | 0    | 0    | 0    | 0    | 0    | 0    | 0    | 0    | 0    | 0    | 0    | 0    | 0    | 0    | 0    | 0    | 0    |
| Serratia marcescens                        | 0    | 0    | 0    | 0    | 0    | 0    | 0    | 0    | 0    | 0    | 0    | 0    | 0    | 0    | 0    | 0    | 0    | 0    | 0    | 0    | 0    | 0    |
| Collinsella aerofaciens                    | 0    | 0    | 0    | 0    | 0    | 0    | 0    | 0    | 0    | 0    | 0    | 0    | 0    | 0    | 0    | 0    | 0    | 0    | 0    | 0    | 0    | 0    |
| Curvibacter                                | 0    | 0    | 0    | 0    | 0    | 0    | 0    | 0    | 0    | 0    | 0    | 0    | 0    | 0    | 0    | 0    | 0    | 0    | 0    | 0    | 0    | 0    |
| Rothia dentocariosa                        | 0    | 0    | 0    | 0    | 0    | 0    | 0    | 0    | 0    | 0    | 0    | 0    | 0    | 0    | 0    | 0    | 0    | 0    | 0    | 0    | 0    | 0    |
| Prevotella bergensis                       | 0    | 0    | 0    | 0    | 0    | 0    | 45   | 0    | 0    | 0    | 0    | 0    | 0    | 0    | 0    | 0    | 0    | 0    | 0    | 0    | 0    | 0    |
| Corynebacterium sundsvallense              | 0    | 0    | 0    | 0    | 0    | 0    | 0    | 0    | 0    | 0    | 0    | 0    | 0    | 0    | 0    | 0    | 0    | 0    | 0    | 0    | 0    | 0    |

Samples S378 - S410

| Species                                       | S378 | S379 | S380 | S382 | S384 | S385 | S386 | S388 | S390 | S391 | S392 | S394 | S396 | S397 | S399 | S400 | S401 | S404 | S405 | S407 | S408 | S410 |
|-----------------------------------------------|------|------|------|------|------|------|------|------|------|------|------|------|------|------|------|------|------|------|------|------|------|------|
| Coriobacteria                                 | 0    | 0    | 0    | 0    | 0    | 0    | 0    | 0    | 0    | 0    | 0    | 0    | 0    | 0    | 0    | 0    | 0    | 0    | 0    | 0    | 0    | 0    |
| Neisseria meningitidis                        | 0    | 0    | 0    | 0    | 0    | 0    | 0    | 0    | 0    | 0    | 0    | 0    | 0    | 0    | 0    | 0    | 0    | 0    | 0    | 0    | 0    | 0    |
| Dermacoccus nishinomiyaensis                  | 0    | 0    | 0    | 0    | 0    | 0    | 0    | 0    | 155  | 0    | 0    | 0    | 0    | 0    | 0    | 0    | 0    | 0    | 0    | 0    | 0    | 0    |
| Leptotrichia                                  | 0    | 0    | 0    | 0    | 0    | 0    | 0    | 0    | 0    | 0    | 0    | 0    | 0    | 0    | 0    | 0    | 0    | 0    | 0    | 0    | 0    | 0    |
| Microbacteriaceae                             | 0    | 0    | 0    | 0    | 0    | 0    | 0    | 0    | 0    | 0    | 0    | 0    | 0    | 0    | 0    | 0    | 0    | 0    | 0    | 0    | 0    | 0    |
| Klebsiella pneumoniae/variiicola              | 0    | 0    | 0    | 0    | 0    | 0    | 0    | 0    | 0    | 0    | 0    | 0    | 0    | 0    | 0    | 0    | 0    | 0    | 0    | 0    | 0    | 0    |
| Hafnia alvei                                  | 0    | 0    | 0    | 0    | 0    | 0    | 0    | 0    | 0    | 0    | 0    | 0    | 0    | 0    | 0    | 0    | 0    | 0    | 0    | 0    | 0    | 0    |
| Caulobacter                                   | 0    | 0    | 0    | 0    | 0    | 0    | 0    | 0    | 0    | 0    | 0    | 0    | 0    | 0    | 0    | 0    | 0    | 0    | 0    | 0    | 0    | 0    |
| Lactobacillus reuteri                         | 0    | 0    | 0    | 0    | 0    | 0    | 0    | 0    | 0    | 0    | 0    | 0    | 0    | 0    | 0    | 0    | 0    | 0    | 0    | 0    | 0    | 0    |
| Gemella morbillorum                           | 0    | 0    | 0    | 0    | 0    | 0    | 0    | 0    | 0    | 0    | 0    | 0    | 0    | 0    | 0    | 0    | 0    | 0    | 0    | 0    | 0    | 0    |
| Rothia                                        | 0    | 0    | 0    | 0    | 0    | 0    | 0    | 0    | 0    | 0    | 0    | 0    | 0    | 0    | 0    | 0    | 0    | 0    | 0    | 0    | 0    | 0    |
| Campylobacter                                 | 0    | 0    | 0    | 0    | 0    | 0    | 0    | 0    | 0    | 0    | 0    | 0    | 0    | 0    | 0    | 0    | 0    | 0    | 0    | 0    | 0    | 0    |
| Prevotella genogroup 3                        | 0    | 0    | 0    | 0    | 0    | 0    | 0    | 0    | 0    | 0    | 0    | 0    | 0    | 0    | 0    | 0    | 0    | 0    | 0    | 0    | 0    | 0    |
| Staphylococcus warneri                        | 0    | 0    | 0    | 0    | 0    | 0    | 0    | 0    | 0    | 0    | 0    | 0    | 0    | 0    | 0    | 0    | 0    | 0    | 0    | 0    | 0    | 0    |
| Blautia wexlerae                              | 0    | 0    | 0    | 0    | 0    | 0    | 0    | 0    | 0    | 0    | 0    | 0    | 0    | 0    | 0    | 0    | 0    | 0    | 0    | 0    | 0    | 0    |
| Lachnoanaerobaculum                           | 0    | 0    | 0    | 0    | 0    | 0    | 0    | 0    | 0    | 0    | 0    | 0    | 0    | 0    | 0    | 0    | 0    | 0    | 0    | 0    | 0    | 0    |
| Anaerococcus hydrogenalis/senegalensis        | 0    | 0    | 0    | 0    | 0    | 0    | 0    | 0    | 0    | 0    | 0    | 0    | 0    | 0    | 0    | 0    | 0    | 0    | 0    | 0    | 0    | 0    |
| Brevibacterium mcbrellneri                    | 0    | 0    | 0    | 0    | 0    | 0    | 0    | 0    | 0    | 0    | 0    | 0    | 0    | 0    | 0    | 0    | 0    | 0    | 0    | 0    | 0    | 0    |
| Corynebacterium glaucum                       | 0    | 0    | 0    | 0    | 0    | 0    | 0    | 0    | 0    | 0    | 0    | 0    | 0    | 0    | 0    | 0    | 0    | 0    | 0    | 0    | 0    | 0    |
| Prevotella salivae                            | 31   | 0    | 0    | 0    | 0    | 0    | 0    | 0    | 0    | 0    | 0    | 0    | 0    | 0    | 0    | 0    | 0    | 0    | 0    | 0    | 0    | 0    |
| Coriobacteriaceae                             | 0    | 0    | 0    | 0    | 0    | 0    | 0    | 0    | 0    | 0    | 0    | 0    | 0    | 0    | 0    | 0    | 0    | 0    | 0    | 0    | 0    | 0    |
| Bulleidia                                     | 0    | 0    | 0    | 0    | 0    | 0    | 0    | 0    | 0    | 0    | 0    | 0    | 0    | 0    | 0    | 0    | 0    | 0    | 0    | 0    | 0    | 0    |
| Peptococcus                                   | 0    | 0    | 0    | 0    | 0    | 0    | 103  | 0    | 0    | 0    | 0    | 0    | 0    | 0    | 0    | 0    | 0    | 0    | 0    | 0    | 0    | 0    |
| Serratia marcescens/nematodiphila             | 0    | 0    | 0    | 0    | 0    | 0    | 0    | 0    | 0    | 0    | 0    | 0    | 0    | 0    | 0    | 0    | 0    | 0    | 0    | 0    | 0    | 0    |
| Leptotrichia wadei                            | 0    | 0    | 0    | 0    | 0    | 0    | 0    | 0    | 0    | 0    | 0    | 0    | 0    | 0    | 0    | 0    | 0    | 0    | 0    | 0    | 0    | 0    |
| Neisseriaceae                                 | 0    | 0    | 0    | 34   | 0    | 0    | 0    | 0    | 0    | 0    | 0    | 0    | 0    | 0    | 0    | 0    | 0    | 0    | 0    | 0    | 0    | 0    |
| Aerococcus sanguinicola                       | 0    | 0    | 0    | 0    | 0    | 0    | 0    | 0    | 0    | 0    | 0    | 0    | 0    | 0    | 0    | 0    | 0    | 0    | 0    | 0    | 0    | 0    |
| Criobacterium bergeronii                      | 0    | 0    | 0    | 0    | 0    | 0    | 0    | 0    | 0    | 0    | 0    | 0    | 0    | 0    | 0    | 0    | 0    | 0    | 0    | 0    | 0    | 0    |
| Brevibacterium luteolum                       | 0    | 0    | 0    | 0    | 0    | 0    | 0    | 0    | 0    | 0    | 0    | 0    | 0    | 0    | 0    | 0    | 0    | 0    | 0    | 0    | 0    | 0    |
| Klebsiella pneumoniae                         | 0    | 0    | 0    | 0    | 0    | 0    | 0    | 0    | 0    | 0    | 0    | 0    | 0    | 0    | 0    | 0    | 0    | 0    | 0    | 0    | 0    | 0    |
| Actinomyces oris/viscosus                     | 0    | 0    | 0    | 0    | 0    | 0    | 0    | 0    | 0    | 0    | 0    | 0    | 0    | 0    | 0    | 0    | 0    | 0    | 0    | 0    | 0    | 0    |
| Mycobacterium chelonae complex                | 0    | 0    | 0    | 0    | 0    | 0    | 0    | 0    | 0    | 0    | 0    | 0    | 0    | 0    | 0    | 0    | 0    | 0    | 0    | 0    | 0    | 0    |
| Corynebacterium jeddahense                    | 0    | 0    | 0    | 0    | 0    | 0    | 0    | 0    | 0    | 0    | 0    | 0    | 0    | 0    | 0    | 0    | 0    | 0    | 0    | 0    | 0    | 0    |
| Peptostreptococcus stomatis                   | 0    | 0    | 0    | 0    | 0    | 0    | 0    | 41   | 0    | 0    | 0    | 0    | 0    | 0    | 0    | 0    | 0    | 0    | 0    | 0    | 0    | 0    |
| Megasphaera                                   | 0    | 0    | 0    | 0    | 0    | 0    | 0    | 0    | 0    | 0    | 0    | 0    | 0    | 0    | 0    | 0    | 0    | 0    | 0    | 0    | 0    | 0    |
| Campylobacter rectus/showae                   | 0    | 0    | 0    | 0    | 0    | 0    | 0    | 0    | 0    | 0    | 0    | 0    | 0    | 0    | 0    | 0    | 0    | 0    | 0    | 0    | 0    | 0    |
| Staphylococcus carnosus/condimenti            | 0    | 0    | 0    | 0    | 0    | 0    | 0    | 0    | 0    | 0    | 0    | 0    | 0    | 0    | 0    | 0    | 0    | 0    | 0    | 0    | 0    | 0    |
| Prevotella pallens                            | 0    | 0    | 0    | 0    | 0    | 0    | 0    | 0    | 0    | 0    | 0    | 0    | 0    | 0    | 0    | 0    | 0    | 0    | 0    | 0    | 0    | 0    |
| Prolinoborus fasciculus/Acinetobacter lwoffii | 0    | 0    | 0    | 0    | 0    | 0    | 0    | 0    | 0    | 0    | 0    | 0    | 0    | 0    | 0    | 0    | 0    | 0    | 0    | 0    | 0    | 0    |
| Staphylococcus nepalensis                     | 0    | 0    | 0    | 0    | 0    | 0    | 0    | 0    | 0    | 0    | 0    | 0    | 0    | 0    | 0    | 0    | 0    | 0    | 0    | 0    | 0    | 0    |
| Staphylococcaceae                             | 0    | 0    | 0    | 0    | 0    | 0    | 0    | 0    | 0    | 0    | 0    | 0    | 0    | 0    | 0    | 0    | 0    | 0    | 0    | 0    | 0    | 0    |
| Cruoricaptor                                  | 0    | 0    | 0    | 0    | 0    | 0    | 0    | 0    | 0    | 0    | 0    | 0    | 0    | 0    | 0    | 0    | 0    | 0    | 0    | 0    | 0    | 0    |
| [Eubacterium] hallii                          | 0    | 0    | 0    | 0    | 0    | 0    | 0    | 0    | 0    | 0    | 0    | 0    | 0    | 0    | 0    | 0    | 0    | 0    | 0    | 0    | 0    | 0    |
| BVAB1 (species)                               | 0    | 0    | 0    | 0    | 0    | 0    | 0    | 0    | 0    | 0    | 0    | 0    | 0    | 0    | 0    | 0    | 0    | 0    | 0    | 0    | 0    | 0    |
| Stomatobaculum                                | 0    | 0    | 0    | 0    | 0    | 0    | 0    | 0    | 0    | 0    | 0    | 0    | 0    | 0    | 0    | 0    | 0    | 0    | 0    | 0    | 0    | 0    |
| Mycoplasma                                    | 0    | 0    | 0    | 0    | 0    | 0    | 0    | 0    | 0    | 0    | 0    | 0    | 0    | 0    | 0    | 0    | 0    | 0    | 0    | 0    | 0    | 0    |
| Catenibacterium mitsuokai                     | 0    | 0    | 0    | 0    | 0    | 0    | 0    | 0    | 0    | 0    | 0    | 0    | 0    | 0    | 0    | 0    | 0    | 0    | 0    | 0    | 0    | 0    |
| Veillonella parvula                           | 0    | 0    | 0    | 0    | 0    | 0    | 0    | 0    | 0    | 0    | 0    | 0    | 0    | 0    | 0    | 0    | 92   | 0    | 0    | 0    | 0    | 0    |
| Corynebacterium kroppenstedtii                | 0    | 0    | 0    | 0    | 0    | 0    | 0    | 158  | 0    | 0    | 0    | 0    | 0    | 0    | 0    | 0    | 0    | 0    | 0    | 0    | 0    | 0    |
| Eremococcus coleocola                         | 0    | 0    | 0    | 0    | 0    | 0    | 0    | 0    | 0    | 0    | 0    | 0    | 0    | 0    | 0    | 0    | 0    | 0    | 0    | 0    | 0    | 0    |
| Actinomyces europaeus                         | 0    | 0    | 0    | 0    | 0    | 0    | 0    | 0    | 0    | 0    | 0    | 0    | 0    | 0    | 0    | 0    | 0    | 0    | 0    | 0    | 0    | 0    |
| Peptoniphilus senegalensis                    | 0    | 0    | 0    | 0    | 0    | 0    | 0    | 0    | 0    | 0    | 0    | 0    | 0    | 0    | 0    | 0    | 0    | 0    | 0    | 0    | 0    | 0    |
| Corynebacterium afermentans/humii             | 0    | 0    | 0    | 0    | 0    | 0    | 0    | 0    | 0    | 0    | 0    | 0    | 0    | 0    | 0    | 0    | 0    | 0    | 0    | 0    | 0    | 0    |
| Acinetobacter                                 | 0    | 0    | 0    | 0    | 0    | 0    | 0    | 0    | 0    | 0    | 0    | 0    | 0    | 0    | 0    | 0    | 0    | 0    | 0    | 0    | 0    | 0    |
| Eggerthellaceae                               | 0    | 0    | 0    | 0    | 0    | 0    | 0    | 0    | 0    | 0    | 0    | 0    | 0    | 0    | 0    | 0    | 0    | 0    | 0    | 0    | 0    | 0    |
| Corynebacterium mucifaciens                   | 0    | 0    | 0    | 0    | 0    | 0    | 0    | 0    | 0    | 0    | 0    | 0    | 0    | 0    | 0    | 0    | 0    | 0    | 0    | 0    | 0    | 0    |
| Filifactor                                    | 0    | 0    | 0    | 0    | 0    | 0    | 0    | 0    | 0    | 0    | 0    | 0    | 0    | 0    | 0    | 0    | 0    | 0    | 0    | 0    | 0    | 0    |
| Ruminococcus faecis                           | 0    | 0    | 0    | 0    | 0    | 0    | 0    | 0    | 0    | 0    | 0    | 0    | 0    | 0    | 0    | 0    | 0    | 0    | 0    | 0    | 0    | 0    |
| Lactobacillus                                 | 0    | 0    | 0    | 0    | 0    | 0    | 0    | 0    | 0    | 0    | 0    | 0    | 0    | 0    | 0    | 0    | 0    | 0    | 0    | 0    | 0    | 0    |
| Peptoniphilus grossensis/rhinitidis           | 0    | 0    | 0    | 0    | 0    | 0    | 0    | 0    | 0    | 0    | 0    | 0    | 0    | 0    | 0    | 0    | 0    | 0    | 0    | 0    | 0    | 0    |
| Aerococcus urinaequi/viridans                 | 0    | 0    | 0    | 0    | 0    | 0    | 0    | 0    | 0    | 0    | 0    | 0    | 0    | 0    | 0    | 0    | 0    | 0    | 0    | 0    | 0    | 0    |
| Anaerostipes hadrus                           | 0    | 0    | 0    | 0    | 0    | 0    | 0    | 0    | 0    | 0    | 0    | 0    | 0    | 0    | 0    | 0    | 0    | 0    | 0    | 0    | 0    | 0    |
| Lagierella                                    | 0    | 0    | 0    | 0    | 0    | 0    | 0    | 0    | 0    | 0    | 0    | 0    | 0    | 0    | 0    | 0    | 0    | 0    | 0    | 0    | 0    | 0    |
| Neisseria cinerea/meningitidis                | 0    | 0    | 0    | 0    | 0    | 0    | 0    | 0    | 0    | 0    | 0    | 0    | 0    | 0    | 0    | 0    | 0    | 0    | 0    | 0    | 0    | 0    |
| Micrococcus lylae                             | 0    | 0    | 0    | 0    | 0    | 0    | 0    | 0    | 0    | 0    | 0    | 0    | 0    | 0    | 0    | 0    | 0    | 0    | 0    | 0    | 0    | 0    |
| Staphylococcus cohnii                         | 0    | 0    | 0    | 0    | 0    | 0    | 0    | 0    | 0    | 0    | 0    | 0    | 0    | 0    | 0    | 0    | 0    | 0    | 0    | 0    | 0    | 0    |
| Casaltella massiliensis                       | 0    | 0    | 0    | 0    | 0    | 0    | 0    | 0    | 0    | 0    | 0    | 0    | 0    | 0    | 0    | 0    | 0    | 0    | 0    | 0    | 0    | 0    |
| Stomatobaculum longum                         | 0    | 0    | 0    | 0    | 0    | 0    | 0    | 0    | 0    | 0    | 0    | 0    | 0    | 0    | 0    | 0    | 0    | 0    | 0    | 0    | 0    | 0    |
| Lautropia                                     | 0    | 0    | 0    | 0    | 0    | 0    | 0    | 0    | 0    | 0    | 0    | 0    | 0    | 0    | 0    | 0    | 0    | 0    | 0    | 0    | 0    | 0    |
| Fastidiosipila                                | 0    | 0    | 0    | 0    | 0    | 0    | 0    | 0    | 0    | 0    | 0    | 0    | 0    | 0    | 0    | 0    | 0    | 0    | 0    | 0    | 0    | 0    |

Samples S378 - S410

| Species                                      | S378 | S379 | S380 | S382 | S384 | S385 | S386 | S388 | S390 | S391 | S392 | S394 | S396 | S397 | S399 | S400 | S401 | S404 | S405 | S407 | S408 | S410 |
|----------------------------------------------|------|------|------|------|------|------|------|------|------|------|------|------|------|------|------|------|------|------|------|------|------|------|
| Corynebacterium durum                        | 0    | 0    | 0    | 0    | 0    | 0    | 0    | 0    | 0    | 0    | 0    | 0    | 0    | 0    | 0    | 0    | 0    | 0    | 0    | 0    | 0    | 0    |
| Actinomyces graevenitzii                     | 0    | 0    | 0    | 0    | 0    | 0    | 0    | 0    | 0    | 0    | 0    | 0    | 0    | 0    | 0    | 0    | 0    | 0    | 0    | 0    | 0    | 0    |
| Staphylococcus cohnii/saprophyticus          | 0    | 0    | 0    | 0    | 0    | 0    | 0    | 0    | 0    | 0    | 0    | 0    | 0    | 0    | 0    | 0    | 0    | 0    | 0    | 0    | 0    | 0    |
| Leptotrichia trevisanii                      | 0    | 0    | 0    | 0    | 0    | 0    | 0    | 0    | 0    | 0    | 0    | 0    | 0    | 0    | 0    | 0    | 0    | 0    | 0    | 0    | 0    | 0    |
| Candidatus Paraburkholderia calva            | 0    | 0    | 0    | 0    | 0    | 0    | 0    | 0    | 0    | 0    | 0    | 0    | 0    | 0    | 0    | 0    | 0    | 0    | 0    | 0    | 0    | 0    |
| Actinomyces urogenitalis                     | 0    | 0    | 0    | 0    | 0    | 0    | 0    | 0    | 0    | 0    | 0    | 0    | 0    | 0    | 0    | 0    | 0    | 0    | 0    | 0    | 0    | 0    |
| Clostridiales                                | 0    | 0    | 0    | 0    | 0    | 0    | 0    | 0    | 0    | 0    | 0    | 0    | 0    | 0    | 0    | 0    | 0    | 0    | 0    | 0    | 0    | 0    |
| Pasteurella caballi                          | 0    | 0    | 0    | 0    | 0    | 0    | 0    | 0    | 0    | 0    | 0    | 0    | 0    | 0    | 0    | 0    | 0    | 0    | 0    | 0    | 0    | 0    |
| Fusobacterium hwasookii/nucleatum            | 0    | 0    | 0    | 0    | 0    | 0    | 0    | 0    | 0    | 0    | 0    | 0    | 0    | 0    | 0    | 0    | 0    | 0    | 0    | 0    | 0    | 0    |
| Corynebacterium riegelii                     | 0    | 0    | 0    | 0    | 0    | 0    | 0    | 0    | 0    | 0    | 0    | 0    | 0    | 0    | 0    | 0    | 0    | 0    | 0    | 0    | 0    | 0    |
| Hafnia                                       | 0    | 0    | 0    | 0    | 0    | 0    | 0    | 0    | 0    | 0    | 0    | 0    | 0    | 0    | 0    | 0    | 0    | 0    | 0    | 0    | 0    | 0    |
| Staphylococcus equorum/saprophyticus/xylosum | 0    | 0    | 0    | 0    | 0    | 0    | 0    | 0    | 0    | 0    | 0    | 0    | 0    | 0    | 0    | 0    | 0    | 0    | 0    | 0    | 0    | 0    |
| Acinetobacter lwoffii                        | 0    | 0    | 0    | 0    | 0    | 0    | 0    | 0    | 0    | 0    | 0    | 0    | 0    | 0    | 0    | 0    | 0    | 0    | 0    | 0    | 0    | 0    |
| Micrococcus cohnii                           | 0    | 0    | 0    | 0    | 0    | 0    | 0    | 0    | 0    | 0    | 0    | 0    | 0    | 0    | 0    | 0    | 0    | 0    | 0    | 0    | 0    | 0    |
| Pseudoclavibacter faecalis                   | 0    | 0    | 0    | 0    | 0    | 0    | 0    | 0    | 0    | 0    | 0    | 0    | 0    | 0    | 0    | 0    | 0    | 0    | 0    | 0    | 0    | 0    |
| Leptotrichia buccalis                        | 0    | 0    | 0    | 0    | 0    | 0    | 0    | 0    | 0    | 0    | 0    | 0    | 0    | 0    | 0    | 0    | 0    | 0    | 0    | 0    | 0    | 0    |
| Actinomyces                                  | 58   | 0    | 0    | 0    | 0    | 0    | 0    | 0    | 43   | 0    | 0    | 0    | 0    | 0    | 0    | 0    | 0    | 0    | 0    | 0    | 0    | 0    |
| Fusobacterium nucleatum/periodonticum        | 0    | 0    | 0    | 0    | 0    | 0    | 0    | 0    | 0    | 0    | 0    | 0    | 0    | 0    | 0    | 0    | 0    | 0    | 0    | 0    | 0    | 0    |
| Lactobacillus saerimneri                     | 0    | 0    | 0    | 0    | 0    | 0    | 0    | 0    | 0    | 0    | 0    | 0    | 0    | 0    | 0    | 0    | 0    | 0    | 0    | 0    | 0    | 0    |
| Actinomycetaceae                             | 0    | 0    | 0    | 0    | 0    | 0    | 0    | 0    | 0    | 0    | 0    | 0    | 0    | 0    | 0    | 0    | 0    | 0    | 0    | 0    | 0    | 0    |
| Dialister                                    | 0    | 0    | 0    | 0    | 0    | 0    | 0    | 0    | 0    | 0    | 0    | 0    | 0    | 0    | 0    | 0    | 0    | 0    | 0    | 0    | 0    | 0    |
| Neisseria mucosa/subflava                    | 0    | 0    | 0    | 0    | 0    | 0    | 0    | 0    | 0    | 0    | 0    | 0    | 0    | 0    | 0    | 0    | 0    | 0    | 0    | 0    | 0    | 0    |
| Paracoccus                                   | 0    | 0    | 0    | 0    | 0    | 0    | 0    | 0    | 0    | 0    | 0    | 0    | 0    | 0    | 0    | 0    | 0    | 0    | 0    | 0    | 0    | 0    |
| Acinetobacter haemolyticus/johnsonii         | 0    | 0    | 0    | 0    | 0    | 0    | 0    | 0    | 0    | 0    | 0    | 0    | 0    | 0    | 0    | 0    | 0    | 0    | 0    | 0    | 0    | 0    |
| Neisseria subflava                           | 0    | 0    | 0    | 0    | 0    | 0    | 0    | 0    | 81   | 0    | 0    | 0    | 0    | 0    | 0    | 0    | 0    | 0    | 0    | 0    | 0    | 0    |
| Acinetobacter proteolyticus                  | 0    | 0    | 0    | 0    | 0    | 0    | 0    | 0    | 0    | 0    | 0    | 0    | 0    | 0    | 0    | 0    | 0    | 0    | 0    | 0    | 0    | 0    |
| Dorea formicigenerans                        | 0    | 0    | 0    | 0    | 0    | 0    | 0    | 0    | 0    | 0    | 0    | 0    | 0    | 0    | 0    | 0    | 0    | 0    | 0    | 0    | 0    | 0    |
| Corynebacterium tuscaniense                  | 0    | 0    | 0    | 0    | 0    | 0    | 0    | 0    | 0    | 0    | 0    | 0    | 0    | 0    | 0    | 0    | 0    | 0    | 0    | 0    | 0    | 0    |
| Massiliomicrobiota timonensis                | 0    | 0    | 0    | 0    | 0    | 0    | 0    | 0    | 0    | 0    | 0    | 0    | 0    | 0    | 0    | 0    | 0    | 0    | 0    | 0    | 0    | 0    |
| Fusobacterium hwasookii                      | 0    | 0    | 0    | 0    | 0    | 0    | 55   | 0    | 0    | 0    | 0    | 0    | 0    | 0    | 0    | 0    | 0    | 0    | 0    | 0    | 0    | 0    |
| Pseudoglutamicibacter albus                  | 0    | 0    | 0    | 0    | 0    | 0    | 0    | 0    | 0    | 0    | 0    | 0    | 0    | 0    | 0    | 0    | 0    | 0    | 0    | 0    | 0    | 0    |
| Clostridiales Family XIII. Incertae Sedis    | 0    | 0    | 0    | 0    | 0    | 0    | 0    | 0    | 0    | 0    | 0    | 0    | 0    | 0    | 0    | 0    | 0    | 0    | 0    | 0    | 0    | 0    |
| Kocuria marina/rhizophila                    | 0    | 0    | 0    | 0    | 0    | 0    | 0    | 0    | 0    | 0    | 0    | 0    | 0    | 0    | 0    | 0    | 0    | 0    | 0    | 0    | 0    | 0    |
| Kocuria                                      | 0    | 0    | 0    | 0    | 0    | 0    | 0    | 0    | 0    | 0    | 0    | 0    | 0    | 0    | 0    | 0    | 0    | 0    | 0    | 0    | 0    | 0    |
| Alloprevotella rava                          | 0    | 0    | 0    | 0    | 0    | 0    | 0    | 0    | 0    | 0    | 0    | 0    | 0    | 0    | 0    | 0    | 0    | 0    | 0    | 0    | 0    | 0    |
| Staphylococcus pettenkoferi                  | 0    | 0    | 0    | 0    | 0    | 0    | 0    | 0    | 0    | 0    | 0    | 0    | 0    | 0    | 0    | 0    | 0    | 0    | 0    | 0    | 0    | 0    |
| Streptococcus pseudoporcinus                 | 0    | 0    | 0    | 0    | 0    | 0    | 0    | 0    | 0    | 0    | 0    | 0    | 0    | 0    | 0    | 0    | 0    | 0    | 0    | 0    | 0    | 0    |
| Kingella                                     | 0    | 0    | 0    | 0    | 0    | 0    | 0    | 0    | 0    | 0    | 0    | 0    | 0    | 0    | 0    | 0    | 0    | 0    | 0    | 0    | 0    | 0    |
| Eikenella                                    | 0    | 0    | 0    | 0    | 0    | 0    | 0    | 0    | 0    | 0    | 0    | 0    | 0    | 0    | 0    | 0    | 0    | 0    | 0    | 0    | 0    | 0    |
| Actinomyces odontolyticus                    | 0    | 0    | 0    | 0    | 0    | 0    | 0    | 34   | 0    | 0    | 0    | 0    | 0    | 0    | 0    | 0    | 0    | 0    | 0    | 0    | 0    | 0    |
| Corynebacterium sphenisci                    | 0    | 0    | 0    | 0    | 0    | 0    | 0    | 0    | 0    | 0    | 0    | 0    | 0    | 0    | 0    | 0    | 0    | 0    | 0    | 0    | 0    | 0    |
| Cutibacterium                                | 0    | 0    | 0    | 0    | 0    | 0    | 0    | 0    | 0    | 0    | 0    | 0    | 0    | 0    | 0    | 0    | 0    | 0    | 0    | 0    | 0    | 0    |
| Staphylococcus xylosum                       | 0    | 0    | 0    | 0    | 0    | 0    | 0    | 0    | 0    | 0    | 0    | 0    | 0    | 0    | 0    | 0    | 0    | 0    | 0    | 0    | 0    | 0    |
| Burkholderiales                              | 0    | 0    | 0    | 0    | 0    | 0    | 0    | 0    | 0    | 0    | 0    | 0    | 0    | 0    | 0    | 0    | 0    | 0    | 0    | 0    | 0    | 0    |
| Massiliomicrobiota/Mycoplasma                | 0    | 0    | 0    | 0    | 0    | 0    | 0    | 0    | 0    | 0    | 0    | 0    | 0    | 0    | 0    | 0    | 0    | 0    | 0    | 0    | 0    | 0    |
| Bacteroidales                                | 0    | 0    | 0    | 0    | 0    | 0    | 0    | 0    | 0    | 0    | 0    | 0    | 0    | 0    | 0    | 0    | 0    | 0    | 0    | 0    | 0    | 0    |
| Campylobacter fetus                          | 0    | 0    | 0    | 0    | 0    | 0    | 0    | 0    | 0    | 0    | 0    | 0    | 0    | 0    | 0    | 0    | 0    | 0    | 0    | 0    | 0    | 0    |
| Prevotella aurantiaca                        | 0    | 0    | 0    | 0    | 0    | 0    | 0    | 0    | 0    | 0    | 0    | 0    | 0    | 0    | 0    | 0    | 0    | 0    | 0    | 0    | 0    | 0    |
| Corynebacterium freneyi/xerosis              | 0    | 0    | 0    | 0    | 0    | 0    | 0    | 0    | 0    | 0    | 0    | 0    | 0    | 0    | 0    | 0    | 0    | 0    | 0    | 0    | 0    | 0    |
| Aerococcaceae                                | 0    | 0    | 0    | 0    | 0    | 0    | 0    | 0    | 0    | 0    | 0    | 0    | 0    | 0    | 0    | 0    | 0    | 0    | 0    | 0    | 0    | 0    |
| Moraxella lacunata                           | 0    | 0    | 0    | 0    | 0    | 0    | 0    | 0    | 0    | 0    | 0    | 0    | 0    | 0    | 0    | 0    | 0    | 0    | 0    | 0    | 0    | 0    |
| Corynebacterium accolens/macginleyi          | 0    | 0    | 0    | 0    | 0    | 0    | 0    | 0    | 0    | 0    | 0    | 0    | 0    | 0    | 0    | 0    | 0    | 0    | 0    | 0    | 0    | 0    |
| Massilia aurea                               | 0    | 0    | 0    | 0    | 0    | 0    | 0    | 0    | 0    | 0    | 0    | 0    | 0    | 0    | 0    | 0    | 0    | 0    | 0    | 0    | 0    | 0    |
| Corynebacterium casei                        | 0    | 0    | 0    | 0    | 0    | 0    | 0    | 0    | 0    | 0    | 0    | 0    | 0    | 0    | 0    | 0    | 0    | 0    | 0    | 0    | 0    | 0    |
| Helcococcus sueciensis                       | 0    | 0    | 0    | 0    | 0    | 0    | 0    | 0    | 0    | 0    | 0    | 0    | 0    | 0    | 0    | 0    | 0    | 0    | 0    | 0    | 0    | 0    |
| Lactobacillus casei/rhannosus                | 0    | 0    | 0    | 0    | 0    | 0    | 0    | 0    | 0    | 0    | 0    | 0    | 0    | 0    | 0    | 0    | 0    | 0    | 0    | 0    | 0    | 0    |
| Holdemanella biformis                        | 0    | 0    | 0    | 0    | 0    | 0    | 0    | 0    | 0    | 0    | 0    | 0    | 0    | 0    | 0    | 0    | 0    | 0    | 0    | 0    | 0    | 0    |
| Pelistega                                    | 0    | 0    | 0    | 0    | 0    | 0    | 0    | 0    | 0    | 0    | 0    | 0    | 0    | 0    | 0    | 0    | 0    | 0    | 0    | 0    | 0    | 0    |
| Actinomyces massiliensis                     | 0    | 0    | 0    | 0    | 0    | 0    | 0    | 30   | 0    | 0    | 0    | 0    | 0    | 0    | 0    | 0    | 0    | 0    | 0    | 0    | 0    | 0    |
| Massilia                                     | 0    | 0    | 0    | 0    | 0    | 0    | 0    | 0    | 0    | 0    | 0    | 0    | 0    | 0    | 0    | 0    | 0    | 0    | 0    | 0    | 0    | 0    |
| Staphylococcus equorum/xylosum               | 0    | 0    | 0    | 0    | 0    | 0    | 0    | 0    | 0    | 0    | 0    | 0    | 0    | 0    | 0    | 0    | 0    | 0    | 0    | 0    | 0    | 0    |
| Streptococcus                                | 0    | 0    | 0    | 0    | 0    | 0    | 0    | 0    | 0    | 0    | 0    | 0    | 0    | 0    | 0    | 0    | 0    | 0    | 0    | 0    | 0    | 0    |
| Cutibacterium avidum                         | 0    | 0    | 0    | 0    | 0    | 0    | 0    | 0    | 0    | 0    | 0    | 0    | 0    | 0    | 0    | 0    | 0    | 0    | 0    | 0    | 0    | 0    |

# Samples S411 - S434

| Species                                            | S411  | S412  | S413  | S415 | S416  | S417  | S418 | S419  | S420  | S421  | S422  | S424  | S425  | S426  | S428  | S430   | S431 | S432  | S433  | S434  |
|----------------------------------------------------|-------|-------|-------|------|-------|-------|------|-------|-------|-------|-------|-------|-------|-------|-------|--------|------|-------|-------|-------|
| Streptococcus mitis group                          | 534   | 8443  | 0     | 2080 | 18358 | 38039 | 0    | 6188  | 14832 | 0     | 191   | 19832 | 29737 | 2852  | 31882 | 3657   | 0    | 36    | 17137 | 49    |
| Lactobacillus iners                                | 0     | 0     | 0     | 0    | 0     | 0     | 0    | 0     | 0     | 0     | 0     | 0     | 0     | 0     | 0     | 145761 | 0    | 0     | 0     | 0     |
| Gardnerella vaginalis                              | 0     | 0     | 7412  | 0    | 0     | 0     | 0    | 0     | 0     | 0     | 11446 | 0     | 0     | 0     | 0     | 16091  | 0    | 0     | 0     | 0     |
| Corynebacterium pseudogenitalium/tuberculostrictum | 37    | 0     | 20707 | 1362 | 524   | 3792  | 1998 | 5017  | 114   | 460   | 76    | 61    | 1932  | 297   | 2612  | 71     | 215  | 2847  | 0     | 101   |
| Streptococcus agalactiae                           | 0     | 30970 | 0     | 0    | 0     | 1535  | 0    | 0     | 0     | 0     | 0     | 0     | 0     | 1018  | 0     | 60     | 26   | 0     | 0     | 0     |
| Veillonella montpellierensis                       | 0     | 0     | 0     | 0    | 0     | 0     | 0    | 0     | 0     | 0     | 0     | 0     | 0     | 0     | 0     | 0      | 0    | 0     | 0     | 0     |
| Streptococcus anginosus                            | 0     | 0     | 0     | 0    | 0     | 0     | 0    | 0     | 0     | 0     | 473   | 0     | 0     | 61    | 0     | 0      | 0    | 0     | 0     | 0     |
| Chlamydia trachomatis                              | 0     | 0     | 0     | 0    | 0     | 0     | 0    | 27158 | 0     | 18452 | 0     | 0     | 0     | 0     | 0     | 0      | 0    | 31929 | 0     | 0     |
| Haemophilus parainfluenzae                         | 1245  | 0     | 0     | 9378 | 86    | 0     | 0    | 84    | 0     | 0     | 0     | 0     | 0     | 41    | 0     | 0      | 0    | 0     | 0     | 0     |
| Finegoldia magna                                   | 645   | 0     | 1277  | 503  | 15490 | 46    | 0    | 656   | 59    | 30    | 816   | 0     | 0     | 16203 | 228   | 0      | 1017 | 111   | 0     | 0     |
| Peptoniphilus asaccharolyticus/grossensis/hareii   | 413   | 0     | 0     | 1105 | 0     | 0     | 0    | 0     | 0     | 0     | 1609  | 0     | 0     | 1578  | 0     | 0      | 212  | 0     | 0     | 0     |
| Sneathia amnii                                     | 0     | 0     | 0     | 0    | 0     | 0     | 0    | 0     | 0     | 0     | 6085  | 0     | 0     | 0     | 0     | 0      | 0    | 0     | 14686 | 0     |
| Staphylococcus caprae/cohnii/epidermidis           | 59    | 27    | 2958  | 959  | 0     | 590   | 178  | 100   | 26    | 77    | 0     | 49    | 47    | 69    | 164   | 138    | 0    | 0     | 0     | 62    |
| Gemella haemolysans/taiwanensis                    | 37    | 0     | 0     | 0    | 0     | 62    | 0    | 153   | 552   | 0     | 30    | 0     | 844   | 0     | 0     | 0      | 0    | 0     | 0     | 0     |
| Sneathia sanguinegens                              | 0     | 0     | 0     | 0    | 0     | 0     | 0    | 0     | 0     | 0     | 0     | 0     | 0     | 0     | 0     | 0      | 0    | 0     | 0     | 0     |
| Mycoplasma genitalium                              | 24227 | 0     | 0     | 0    | 340   | 0     | 0    | 0     | 0     | 0     | 0     | 0     | 0     | 0     | 0     | 0      | 0    | 21331 | 0     | 64229 |
| Mycoplasma penetrans                               | 0     | 0     | 0     | 0    | 0     | 0     | 0    | 0     | 0     | 0     | 0     | 0     | 0     | 0     | 0     | 0      | 0    | 0     | 0     | 0     |
| Haemophilus haemolyticus/quentini                  | 0     | 0     | 0     | 0    | 0     | 0     | 0    | 6957  | 129   | 0     | 0     | 0     | 0     | 0     | 0     | 0      | 0    | 0     | 0     | 0     |
| Corynebacterium pyruviciproducens                  | 0     | 0     | 0     | 0    | 0     | 0     | 0    | 0     | 27    | 0     | 0     | 0     | 0     | 0     | 0     | 0      | 0    | 0     | 0     | 0     |
| Anaerococcus prevotii/tetradius                    | 190   | 0     | 0     | 238  | 1070  | 43    | 0    | 262   | 0     | 0     | 2128  | 0     | 0     | 463   | 0     | 0      | 153  | 0     | 0     | 0     |
| Haemophilus influenzae                             | 0     | 0     | 0     | 0    | 0     | 0     | 0    | 30446 | 0     | 0     | 0     | 0     | 0     | 0     | 1114  | 0      | 0    | 0     | 0     | 0     |
| Staphylococcus epidermidis/hominis                 | 36    | 0     | 556   | 470  | 81    | 1349  | 0    | 255   | 0     | 76    | 0     | 0     | 324   | 69    | 35    | 0      | 0    | 94    | 0     | 0     |
| Atopobium vaginae                                  | 0     | 0     | 0     | 0    | 0     | 0     | 0    | 0     | 0     | 0     | 0     | 0     | 0     | 0     | 0     | 0      | 0    | 0     | 0     | 0     |
| Ureaplasma parvum/urealyticum                      | 0     | 0     | 0     | 0    | 0     | 0     | 0    | 12256 | 1682  | 0     | 0     | 0     | 0     | 0     | 3092  | 5061   | 0    | 0     | 2539  | 0     |
| Prevotella timonensis                              | 0     | 0     | 0     | 1183 | 0     | 0     | 0    | 0     | 0     | 0     | 0     | 0     | 0     | 232   | 0     | 0      | 0    | 0     | 0     | 0     |
| Fenollaria massiliensis/timonensis                 | 0     | 0     | 0     | 0    | 0     | 0     | 0    | 0     | 0     | 0     | 0     | 0     | 0     | 0     | 0     | 0      | 0    | 0     | 0     | 0     |
| Anaerococcus                                       | 0     | 0     | 179   | 1493 | 354   | 0     | 0    | 0     | 0     | 0     | 0     | 0     | 0     | 0     | 0     | 0      | 27   | 0     | 0     | 0     |
| Corynebacterium coyleae                            | 190   | 0     | 100   | 975  | 0     | 150   | 0    | 0     | 0     | 0     | 178   | 0     | 705   | 0     | 26    | 0      | 39   | 0     | 0     | 0     |
| Prevotella bivia                                   | 0     | 0     | 0     | 0    | 0     | 0     | 0    | 0     | 0     | 0     | 6438  | 0     | 0     | 8627  | 0     | 0      | 0    | 0     | 0     | 0     |
| Prevotella melaninogenica                          | 0     | 0     | 0     | 0    | 0     | 0     | 0    | 0     | 0     | 0     | 0     | 0     | 0     | 0     | 0     | 0      | 0    | 0     | 0     | 0     |
| Corynebacterium aurimucosum/minutissimum/singulare | 0     | 0     | 2932  | 311  | 0     | 448   | 229  | 449   | 0     | 70    | 0     | 0     | 183   | 0     | 1136  | 0      | 0    | 953   | 0     | 0     |
| Staphylococcus aureus                              | 0     | 0     | 0     | 0    | 0     | 0     | 0    | 0     | 0     | 0     | 0     | 0     | 0     | 0     | 0     | 0      | 0    | 0     | 0     | 0     |
| Anaerococcus lactolyticus                          | 0     | 0     | 0     | 0    | 0     | 0     | 0    | 0     | 0     | 0     | 0     | 0     | 0     | 0     | 0     | 0      | 0    | 0     | 0     | 0     |
| Aerococcus christensenii                           | 0     | 0     | 0     | 0    | 0     | 0     | 0    | 0     | 0     | 0     | 0     | 0     | 0     | 0     | 0     | 0      | 0    | 0     | 0     | 0     |
| Corynebacterium glucuronolyticum                   | 0     | 0     | 398   | 38   | 0     | 141   | 0    | 159   | 0     | 0     | 0     | 0     | 0     | 513   | 0     | 0      | 0    | 0     | 0     | 0     |
| Veillonella atypica                                | 0     | 54    | 2113  | 0    | 0     | 1078  | 0    | 132   | 0     | 0     | 0     | 0     | 0     | 0     | 0     | 273    | 0    | 0     | 0     | 0     |
| Veillonella                                        | 0     | 0     | 0     | 0    | 0     | 0     | 0    | 39    | 737   | 0     | 0     | 0     | 0     | 0     | 0     | 0      | 0    | 0     | 0     | 0     |
| Mycoplasma hominis                                 | 0     | 0     | 0     | 0    | 0     | 0     | 0    | 0     | 0     | 0     | 0     | 0     | 0     | 0     | 0     | 0      | 0    | 0     | 0     | 0     |
| Granulicatella elegans                             | 48    | 0     | 0     | 0    | 0     | 0     | 0    | 0     | 0     | 0     | 0     | 0     | 0     | 0     | 0     | 0      | 0    | 0     | 0     | 0     |
| Ezakiella                                          | 0     | 0     | 0     | 0    | 0     | 0     | 0    | 0     | 0     | 0     | 0     | 0     | 0     | 0     | 0     | 0      | 0    | 0     | 0     | 0     |
| Shigella/Escherichia                               | 0     | 0     | 0     | 0    | 0     | 0     | 0    | 0     | 0     | 0     | 0     | 0     | 0     | 0     | 0     | 0      | 0    | 0     | 0     | 0     |
| Streptococcus salivarius                           | 0     | 29    | 0     | 0    | 0     | 76    | 0    | 115   | 0     | 0     | 0     | 0     | 0     | 0     | 0     | 664    | 0    | 0     | 0     | 0     |
| Actinomyces turicensis                             | 0     | 0     | 0     | 0    | 0     | 0     | 0    | 0     | 0     | 0     | 0     | 0     | 0     | 0     | 0     | 0      | 0    | 0     | 0     | 0     |
| Prevotella corporis                                | 0     | 0     | 0     | 0    | 0     | 0     | 0    | 0     | 0     | 0     | 0     | 0     | 0     | 0     | 0     | 0      | 0    | 0     | 0     | 0     |
| Corynebacterium simulans                           | 55    | 0     | 0     | 0    | 7990  | 0     | 0    | 0     | 0     | 0     | 0     | 0     | 0     | 607   | 0     | 0      | 148  | 0     | 0     | 0     |
| Fusobacterium equinum                              | 0     | 0     | 0     | 0    | 0     | 0     | 0    | 0     | 0     | 0     | 0     | 0     | 0     | 0     | 0     | 0      | 0    | 0     | 0     | 0     |
| Corynebacterium                                    | 0     | 0     | 1443  | 0    | 703   | 27    | 0    | 0     | 0     | 0     | 0     | 0     | 114   | 0     | 0     | 0      | 0    | 0     | 0     | 0     |
| Staphylococcus haemolyticus                        | 0     | 0     | 0     | 659  | 0     | 2449  | 0    | 0     | 0     | 364   | 75    | 0     | 62    | 0     | 238   | 0      | 0    | 39    | 0     | 0     |
| Gemella asaccharolytica                            | 0     | 0     | 0     | 0    | 0     | 0     | 0    | 0     | 0     | 0     | 0     | 0     | 0     | 0     | 0     | 0      | 0    | 0     | 0     | 0     |
| Peptoniphilus                                      | 0     | 0     | 0     | 27   | 0     | 0     | 0    | 84    | 0     | 0     | 0     | 0     | 0     | 0     | 0     | 0      | 0    | 0     | 0     | 0     |
| Corynebacterium hadale/imitans                     | 0     | 0     | 0     | 218  | 0     | 106   | 0    | 33    | 0     | 61    | 0     | 0     | 0     | 58    | 806   | 0      | 0    | 520   | 0     | 0     |
| Eggerthella sp. type 1 (species)                   | 0     | 0     | 0     | 0    | 0     | 0     | 0    | 0     | 0     | 0     | 0     | 0     | 0     | 0     | 0     | 321    | 0    | 0     | 0     | 0     |
| Prevotella disiens                                 | 0     | 0     | 0     | 0    | 0     | 0     | 0    | 0     | 0     | 0     | 0     | 0     | 0     | 0     | 0     | 0      | 0    | 0     | 0     | 0     |
| Peptoniphilus lacrimalis                           | 0     | 0     | 0     | 0    | 0     | 0     | 0    | 0     | 0     | 0     | 0     | 0     | 0     | 0     | 0     | 0      | 0    | 0     | 0     | 0     |
| Anaerococcus vaginalis                             | 0     | 0     | 0     | 0    | 0     | 0     | 0    | 0     | 0     | 0     | 0     | 0     | 0     | 0     | 0     | 0      | 0    | 0     | 0     | 0     |
| Facklamia hominis                                  | 0     | 0     | 0     | 832  | 0     | 0     | 0    | 0     | 0     | 0     | 0     | 0     | 0     | 0     | 0     | 0      | 0    | 0     | 0     | 0     |
| Prevotella amnii                                   | 0     | 0     | 0     | 0    | 0     | 0     | 0    | 0     | 0     | 0     | 0     | 0     | 0     | 0     | 0     | 0      | 0    | 0     | 0     | 0     |
| Campylobacter ureolyticus                          | 0     | 0     | 0     | 0    | 0     | 0     | 0    | 0     | 0     | 0     | 0     | 0     | 0     | 33    | 0     | 0      | 0    | 0     | 0     | 0     |
| BVAB2 (species)                                    | 0     | 0     | 0     | 0    | 0     | 0     | 0    | 0     | 0     | 0     | 0     | 0     | 0     | 0     | 0     | 0      | 0    | 0     | 0     | 0     |
| Haemophilus                                        | 0     | 0     | 0     | 0    | 0     | 0     | 0    | 0     | 0     | 0     | 0     | 0     | 0     | 0     | 0     | 0      | 0    | 0     | 0     | 0     |
| Anaerococcus hydrogenalis/rubeifantis              | 74    | 0     | 0     | 160  | 1005  | 0     | 0    | 0     | 0     | 0     | 0     | 0     | 0     | 1352  | 0     | 0      | 27   | 0     | 0     | 0     |
| Anaerococcus mediterraneensis                      | 0     | 0     | 0     | 0    | 0     | 0     | 0    | 0     | 0     | 0     | 0     | 0     | 0     | 0     | 0     | 0      | 0    | 0     | 0     | 0     |
| Dialister sp. type 2                               | 0     | 0     | 0     | 0    | 0     | 0     | 0    | 0     | 0     | 0     | 0     | 0     | 0     | 0     | 0     | 0      | 0    | 0     | 0     | 0     |
| Dialister microaerophilus                          | 0     | 0     | 0     | 0    | 0     | 0     | 0    | 0     | 0     | 0     | 0     | 0     | 0     | 0     | 0     | 0      | 0    | 0     | 0     | 0     |
| Corynebacterium amycolatum                         | 0     | 0     | 122   | 0    | 0     | 0     | 0    | 0     | 0     | 0     | 0     | 0     | 0     | 0     | 0     | 0      | 0    | 0     | 0     | 0     |
| Ureaplasma                                         | 0     | 0     | 0     | 0    | 0     | 0     | 0    | 0     | 0     | 0     | 0     | 0     | 0     | 0     | 0     | 0      | 0    | 0     | 0     | 0     |
| Enterococcus faecalis                              | 29    | 0     | 4656  | 0    | 360   | 0     | 0    | 0     | 0     | 0     | 0     | 0     | 0     | 143   | 0     | 0      | 0    | 0     | 0     | 0     |
| Parvimonas                                         | 0     | 0     | 0     | 0    | 0     | 0     | 0    | 0     | 0     | 0     | 0     | 0     | 0     | 0     | 0     | 0      | 0    | 0     | 0     | 0     |
| Haemophilus pittmaniae                             | 0     | 0     | 0     | 0    | 0     | 0     | 0    | 0     | 0     | 0     | 0     | 0     | 0     | 0     | 0     | 0      | 0    | 0     | 0     | 0     |
| Actinomyces neuii                                  | 35    | 0     | 0     | 0    | 544   | 0     | 0    | 88    | 179   | 0     | 143   | 0     | 0     | 1194  | 0     | 0      | 137  | 0     | 0     | 0     |

# Samples S411 - S434

| Species                                                 | S411 | S412 | S413 | S415 | S416 | S417 | S418 | S419 | S420 | S421 | S422 | S424 | S425 | S426 | S428 | S430 | S431 | S432 | S433 | S434 |
|---------------------------------------------------------|------|------|------|------|------|------|------|------|------|------|------|------|------|------|------|------|------|------|------|------|
| Peptoniphilus rhinitidis                                | 0    | 0    | 203  | 0    | 0    | 0    | 0    | 0    | 0    | 0    | 0    | 0    | 0    | 476  | 0    | 0    | 0    | 0    | 0    | 0    |
| Anaerococcus senegalensis                               | 0    | 0    | 75   | 44   | 632  | 0    | 0    | 246  | 0    | 0    | 0    | 0    | 0    | 214  | 0    | 0    | 0    | 0    | 0    | 0    |
| Peptostreptococcus anaerobius                           | 42   | 0    | 0    | 0    | 0    | 0    | 0    | 0    | 0    | 0    | 0    | 0    | 0    | 0    | 0    | 0    | 0    | 0    | 0    | 0    |
| Dialister propionificiens                               | 0    | 0    | 0    | 0    | 0    | 0    | 0    | 0    | 0    | 0    | 0    | 0    | 0    | 1283 | 0    | 0    | 0    | 0    | 0    | 0    |
| Peptoniphilus harei                                     | 0    | 0    | 133  | 178  | 0    | 0    | 0    | 161  | 0    | 0    | 0    | 0    | 0    | 223  | 0    | 0    | 0    | 0    | 0    | 0    |
| Negativicoccus succinivorans                            | 0    | 0    | 0    | 86   | 0    | 0    | 0    | 32   | 0    | 0    | 0    | 0    | 0    | 1156 | 0    | 0    | 0    | 0    | 0    | 0    |
| Parvimonas micra                                        | 0    | 0    | 0    | 0    | 0    | 0    | 0    | 0    | 0    | 0    | 0    | 0    | 0    | 0    | 0    | 0    | 0    | 0    | 0    | 0    |
| Actinomyces ihumii                                      | 0    | 0    | 0    | 28   | 0    | 0    | 0    | 0    | 0    | 0    | 0    | 0    | 0    | 0    | 0    | 0    | 0    | 0    | 0    | 0    |
| Actinotignum timonense                                  | 0    | 0    | 0    | 109  | 0    | 0    | 0    | 0    | 0    | 0    | 0    | 0    | 0    | 0    | 0    | 0    | 0    | 0    | 0    | 0    |
| Fenollaria                                              | 0    | 0    | 0    | 0    | 0    | 0    | 0    | 0    | 0    | 0    | 0    | 0    | 0    | 0    | 0    | 0    | 0    | 0    | 0    | 0    |
| Fusobacterium massiliense                               | 0    | 0    | 0    | 0    | 0    | 0    | 0    | 0    | 0    | 0    | 0    | 0    | 0    | 0    | 0    | 0    | 0    | 0    | 0    | 0    |
| Actinobaculum massiliense                               | 0    | 0    | 0    | 0    | 0    | 0    | 0    | 0    | 0    | 0    | 0    | 0    | 0    | 0    | 0    | 0    | 0    | 0    | 0    | 0    |
| Peptoniphilus coxii                                     | 0    | 0    | 0    | 0    | 0    | 0    | 0    | 0    | 0    | 0    | 0    | 0    | 0    | 28   | 0    | 0    | 0    | 0    | 0    | 0    |
| Staphylococcus lugdunensis                              | 0    | 0    | 0    | 0    | 0    | 0    | 0    | 0    | 0    | 0    | 0    | 0    | 0    | 0    | 0    | 0    | 0    | 0    | 0    | 0    |
| Dermabacter                                             | 0    | 0    | 418  | 0    | 0    | 0    | 121  | 36   | 0    | 0    | 0    | 0    | 39   | 0    | 196  | 0    | 0    | 132  | 0    | 0    |
| Alloscardovia omnicolens                                | 0    | 0    | 0    | 0    | 0    | 0    | 0    | 0    | 0    | 0    | 397  | 0    | 0    | 0    | 0    | 0    | 0    | 0    | 0    | 0    |
| Varibaculum cambriense                                  | 0    | 0    | 0    | 0    | 0    | 0    | 0    | 0    | 0    | 0    | 0    | 0    | 0    | 27   | 0    | 0    | 0    | 0    | 0    | 0    |
| Streptococcus urinalis                                  | 0    | 0    | 0    | 0    | 0    | 0    | 0    | 0    | 26   | 0    | 0    | 0    | 0    | 0    | 0    | 0    | 299  | 0    | 0    | 0    |
| Corynebacterium appendicis                              | 0    | 0    | 0    | 106  | 0    | 28   | 0    | 0    | 0    | 0    | 0    | 0    | 106  | 0    | 0    | 0    | 0    | 30   | 0    | 0    |
| Actinotignum schaalii                                   | 0    | 0    | 0    | 0    | 0    | 0    | 0    | 0    | 0    | 0    | 0    | 0    | 0    | 0    | 0    | 0    | 0    | 0    | 0    | 0    |
| Corynebacterium timonense                               | 0    | 0    | 0    | 0    | 0    | 0    | 0    | 0    | 0    | 0    | 0    | 0    | 0    | 0    | 0    | 0    | 0    | 0    | 0    | 0    |
| Gemella                                                 | 0    | 0    | 0    | 0    | 0    | 0    | 0    | 0    | 0    | 0    | 0    | 0    | 0    | 0    | 0    | 0    | 0    | 0    | 0    | 0    |
| Klebsiella aerogenes/Enterobacter asburiae              | 0    | 0    | 0    | 0    | 0    | 0    | 0    | 0    | 0    | 0    | 0    | 0    | 0    | 0    | 0    | 0    | 0    | 0    | 0    | 0    |
| Fusobacterium periodonticum                             | 0    | 0    | 0    | 0    | 0    | 0    | 0    | 0    | 0    | 0    | 0    | 0    | 0    | 0    | 0    | 0    | 0    | 0    | 0    | 0    |
| Veillonella dispar                                      | 0    | 0    | 0    | 0    | 37   | 0    | 0    | 316  | 0    | 0    | 0    | 0    | 0    | 0    | 0    | 0    | 0    | 0    | 0    | 0    |
| Prevotella colorans                                     | 0    | 0    | 0    | 0    | 0    | 0    | 0    | 0    | 0    | 0    | 0    | 0    | 0    | 0    | 0    | 0    | 0    | 0    | 0    | 0    |
| Candidatus Peptoniphilus massiliensis                   | 0    | 0    | 0    | 0    | 0    | 0    | 0    | 0    | 0    | 0    | 0    | 0    | 0    | 0    | 0    | 0    | 0    | 0    | 0    | 0    |
| Eremococcus                                             | 0    | 0    | 0    | 0    | 0    | 0    | 0    | 65   | 0    | 0    | 0    | 0    | 0    | 0    | 150  | 0    | 0    | 118  | 0    | 0    |
| Varibaculum anthropi                                    | 0    | 0    | 0    | 0    | 0    | 0    | 0    | 0    | 0    | 0    | 0    | 0    | 0    | 0    | 0    | 0    | 0    | 0    | 0    | 0    |
| Propionimicrobium lymphophilum                          | 0    | 0    | 0    | 130  | 0    | 0    | 0    | 0    | 0    | 0    | 0    | 0    | 0    | 0    | 0    | 0    | 0    | 0    | 0    | 0    |
| Streptococcus dysgalactiae                              | 589  | 0    | 0    | 0    | 0    | 0    | 0    | 0    | 0    | 0    | 0    | 0    | 0    | 0    | 0    | 0    | 0    | 0    | 0    | 0    |
| Negativicoccus                                          | 0    | 0    | 0    | 0    | 0    | 0    | 0    | 0    | 0    | 0    | 0    | 0    | 0    | 74   | 0    | 0    | 0    | 0    | 0    | 0    |
| Porphyromonas somerae                                   | 0    | 0    | 0    | 0    | 0    | 0    | 0    | 0    | 0    | 0    | 0    | 0    | 0    | 0    | 0    | 0    | 0    | 0    | 0    | 0    |
| Corynebacterium jeikeium                                | 0    | 0    | 0    | 318  | 0    | 0    | 26   | 0    | 0    | 34   | 0    | 0    | 0    | 0    | 0    | 0    | 0    | 132  | 0    | 0    |
| Mobiluncus curtisii                                     | 0    | 0    | 0    | 0    | 0    | 0    | 0    | 0    | 0    | 0    | 0    | 0    | 0    | 0    | 0    | 0    | 0    | 0    | 0    | 0    |
| Porphyromonas uenonis                                   | 0    | 0    | 0    | 0    | 0    | 0    | 0    | 0    | 0    | 0    | 0    | 0    | 0    | 0    | 0    | 0    | 0    | 0    | 0    | 0    |
| Aerococcus urinae                                       | 0    | 0    | 0    | 0    | 0    | 0    | 0    | 0    | 0    | 0    | 0    | 0    | 0    | 0    | 0    | 0    | 0    | 0    | 0    | 0    |
| Corynebacterium mycetoides                              | 0    | 0    | 0    | 0    | 0    | 0    | 0    | 0    | 0    | 0    | 0    | 0    | 0    | 0    | 0    | 0    | 0    | 0    | 0    | 0    |
| Cutibacterium acnes                                     | 0    | 0    | 0    | 0    | 0    | 0    | 0    | 0    | 0    | 0    | 0    | 0    | 0    | 0    | 0    | 0    | 0    | 0    | 0    | 0    |
| Urinacoccus massiliensis                                | 0    | 0    | 0    | 144  | 0    | 0    | 0    | 0    | 0    | 0    | 0    | 0    | 0    | 0    | 0    | 0    | 0    | 0    | 0    | 0    |
| Campylobacter hominis                                   | 0    | 0    | 0    | 0    | 0    | 0    | 0    | 0    | 0    | 0    | 0    | 0    | 0    | 0    | 0    | 0    | 0    | 0    | 0    | 0    |
| Staphylococcus capitis/caprae                           | 0    | 0    | 0    | 114  | 0    | 0    | 0    | 0    | 0    | 0    | 0    | 0    | 0    | 0    | 108  | 0    | 0    | 200  | 0    | 0    |
| Sneathia                                                | 0    | 0    | 0    | 0    | 0    | 0    | 0    | 0    | 0    | 0    | 0    | 0    | 0    | 0    | 0    | 0    | 0    | 0    | 0    | 0    |
| Prevotella jejuni                                       | 0    | 0    | 0    | 0    | 0    | 0    | 0    | 0    | 0    | 0    | 0    | 0    | 0    | 0    | 0    | 0    | 0    | 0    | 0    | 0    |
| Varibaculum                                             | 0    | 0    | 0    | 0    | 0    | 0    | 0    | 0    | 0    | 0    | 0    | 0    | 0    | 0    | 0    | 0    | 0    | 0    | 0    | 0    |
| Corynebacterium striatum                                | 0    | 0    | 0    | 0    | 0    | 0    | 0    | 0    | 0    | 0    | 0    | 0    | 0    | 0    | 0    | 0    | 0    | 0    | 0    | 0    |
| Jonquetella anthropi                                    | 0    | 0    | 0    | 0    | 0    | 0    | 0    | 0    | 0    | 0    | 0    | 0    | 0    | 0    | 0    | 0    | 0    | 0    | 0    | 0    |
| Peptoniphilus koenoenieniae                             | 0    | 0    | 0    | 0    | 0    | 0    | 0    | 0    | 0    | 0    | 0    | 0    | 0    | 0    | 0    | 0    | 0    | 0    | 0    | 0    |
| Bifidobacterium longum                                  | 0    | 0    | 0    | 0    | 0    | 0    | 0    | 0    | 0    | 0    | 0    | 0    | 0    | 0    | 0    | 620  | 0    | 0    | 0    | 0    |
| Helicobacter                                            | 0    | 0    | 0    | 0    | 0    | 0    | 0    | 0    | 0    | 0    | 0    | 0    | 0    | 0    | 0    | 0    | 0    | 0    | 0    | 0    |
| Lawsonella clevelandensis                               | 0    | 0    | 0    | 0    | 0    | 0    | 0    | 0    | 0    | 0    | 0    | 0    | 0    | 0    | 0    | 0    | 0    | 0    | 0    | 0    |
| Escherichia coli/fergusonii                             | 0    | 0    | 0    | 0    | 0    | 0    | 0    | 0    | 0    | 0    | 0    | 0    | 0    | 0    | 0    | 0    | 0    | 0    | 0    | 0    |
| Fusobacterium nucleatum                                 | 0    | 0    | 0    | 0    | 0    | 0    | 0    | 0    | 0    | 0    | 0    | 0    | 0    | 0    | 0    | 0    | 0    | 0    | 0    | 0    |
| Porphyromonas asaccharolytica                           | 0    | 0    | 0    | 0    | 0    | 0    | 0    | 0    | 0    | 0    | 0    | 0    | 0    | 0    | 0    | 0    | 0    | 0    | 0    | 0    |
| Anaerococcus octavius                                   | 0    | 0    | 254  | 60   | 0    | 0    | 0    | 31   | 0    | 0    | 0    | 0    | 0    | 0    | 0    | 0    | 0    | 0    | 0    | 0    |
| Fusobacterium                                           | 0    | 0    | 0    | 0    | 0    | 0    | 0    | 0    | 0    | 0    | 0    | 0    | 0    | 0    | 0    | 0    | 0    | 0    | 0    | 0    |
| Corynebacterium phoceense                               | 0    | 0    | 0    | 0    | 0    | 0    | 0    | 0    | 0    | 0    | 0    | 0    | 0    | 0    | 0    | 0    | 0    | 0    | 0    | 0    |
| Ruminococcus                                            | 0    | 0    | 0    | 0    | 0    | 0    | 0    | 0    | 0    | 0    | 0    | 0    | 0    | 0    | 0    | 0    | 0    | 0    | 0    | 0    |
| Arcanobacterium                                         | 0    | 0    | 0    | 0    | 0    | 0    | 0    | 0    | 0    | 0    | 0    | 0    | 0    | 0    | 0    | 0    | 0    | 0    | 0    | 0    |
| Khoudiadiopia                                           | 0    | 0    | 0    | 0    | 0    | 0    | 0    | 0    | 0    | 0    | 0    | 0    | 0    | 0    | 0    | 0    | 0    | 0    | 0    | 0    |
| Atopobium deltae                                        | 0    | 0    | 0    | 0    | 0    | 0    | 0    | 0    | 0    | 0    | 0    | 0    | 0    | 0    | 0    | 0    | 0    | 0    | 0    | 0    |
| Haemophilus parahaemolyticus                            | 0    | 0    | 0    | 0    | 0    | 0    | 0    | 0    | 0    | 0    | 0    | 0    | 0    | 0    | 0    | 0    | 0    | 0    | 0    | 0    |
| Howardella                                              | 0    | 0    | 0    | 0    | 0    | 0    | 0    | 0    | 0    | 0    | 0    | 0    | 0    | 0    | 0    | 0    | 0    | 0    | 0    | 0    |
| Prevotella buccalis                                     | 0    | 0    | 0    | 0    | 0    | 0    | 0    | 0    | 0    | 0    | 0    | 0    | 0    | 25   | 0    | 0    | 0    | 0    | 0    | 0    |
| Corynebacterium auris                                   | 0    | 0    | 0    | 0    | 0    | 0    | 0    | 0    | 0    | 0    | 0    | 0    | 0    | 0    | 0    | 0    | 0    | 0    | 0    | 0    |
| Candidatus Mycoplasma girdarii                          | 0    | 0    | 0    | 0    | 0    | 0    | 0    | 0    | 0    | 0    | 0    | 0    | 0    | 0    | 0    | 0    | 0    | 0    | 0    | 0    |
| Alloiooccus                                             | 0    | 0    | 0    | 0    | 0    | 0    | 0    | 0    | 0    | 0    | 0    | 0    | 0    | 0    | 0    | 0    | 0    | 0    | 0    | 0    |
| Corynebacterium fournierii/mucifaciens/ureicelerivorans | 0    | 0    | 156  | 131  | 0    | 0    | 0    | 0    | 0    | 0    | 0    | 0    | 252  | 0    | 0    | 0    | 0    | 78   | 0    | 0    |
| Corynebacterium auris/timonense                         | 0    | 0    | 0    | 0    | 0    | 0    | 0    | 0    | 0    | 0    | 0    | 0    | 0    | 0    | 0    | 0    | 0    | 0    | 0    | 0    |
| Veillonella ratti/seminalis                             | 0    | 0    | 0    | 0    | 0    | 0    | 0    | 0    | 0    | 0    | 0    | 0    | 0    | 0    | 0    | 0    | 0    | 0    | 0    | 0    |



# Samples S411 - S434

| Species                                    | S411 | S412 | S413 | S415 | S416 | S417 | S418 | S419 | S420 | S421 | S422 | S424 | S425 | S426 | S428 | S430 | S431 | S432 | S433 | S434 |
|--------------------------------------------|------|------|------|------|------|------|------|------|------|------|------|------|------|------|------|------|------|------|------|------|
| Lactobacillus gasseri                      | 0    | 0    | 0    | 0    | 0    | 0    | 0    | 0    | 0    | 0    | 0    | 0    | 0    | 0    | 0    | 0    | 0    | 0    | 0    | 0    |
| Tissierella                                | 0    | 0    | 0    | 0    | 0    | 0    | 0    | 0    | 0    | 0    | 0    | 0    | 0    | 0    | 0    | 0    | 0    | 0    | 0    | 0    |
| Granulicatella adiacens                    | 0    | 0    | 0    | 0    | 0    | 0    | 0    | 75   | 0    | 0    | 0    | 0    | 0    | 0    | 0    | 0    | 0    | 0    | 0    | 0    |
| Sutterella                                 | 0    | 0    | 0    | 0    | 0    | 0    | 0    | 0    | 0    | 0    | 0    | 0    | 0    | 0    | 0    | 0    | 0    | 0    | 0    | 0    |
| Prevotella nanceiensis                     | 0    | 0    | 0    | 0    | 0    | 0    | 0    | 0    | 0    | 0    | 0    | 0    | 0    | 0    | 0    | 0    | 0    | 0    | 0    | 0    |
| Lactobacillus jensenii                     | 0    | 0    | 0    | 0    | 0    | 0    | 0    | 0    | 0    | 0    | 0    | 0    | 0    | 0    | 0    | 0    | 0    | 0    | 0    | 0    |
| Lactobacillus crispatus                    | 0    | 0    | 0    | 0    | 0    | 0    | 0    | 0    | 0    | 0    | 0    | 0    | 0    | 0    | 0    | 0    | 0    | 0    | 0    | 0    |
| Candidate Division TM7 vaginal (genus)     | 0    | 0    | 0    | 0    | 0    | 0    | 0    | 0    | 0    | 0    | 0    | 0    | 0    | 0    | 0    | 0    | 0    | 0    | 0    | 0    |
| Candidatus Saccharimonas                   | 0    | 0    | 0    | 0    | 0    | 0    | 0    | 28   | 0    | 0    | 0    | 0    | 327  | 0    | 0    | 0    | 0    | 0    | 0    | 0    |
| Peptococcus niger                          | 0    | 0    | 0    | 0    | 0    | 0    | 0    | 0    | 0    | 0    | 0    | 0    | 0    | 0    | 0    | 0    | 0    | 0    | 0    | 0    |
| Neisseria flavescens/perflava              | 0    | 0    | 0    | 0    | 0    | 0    | 0    | 238  | 0    | 0    | 0    | 0    | 0    | 0    | 0    | 0    | 0    | 0    | 0    | 0    |
| Gemella sanguinis                          | 0    | 0    | 0    | 0    | 0    | 0    | 0    | 0    | 0    | 0    | 0    | 0    | 0    | 0    | 0    | 0    | 0    | 0    | 0    | 0    |
| Porphyromonas                              | 0    | 0    | 0    | 0    | 0    | 0    | 0    | 0    | 0    | 0    | 0    | 0    | 0    | 0    | 0    | 0    | 0    | 0    | 0    | 0    |
| Prevotella                                 | 0    | 0    | 0    | 0    | 0    | 0    | 0    | 0    | 0    | 0    | 0    | 0    | 0    | 0    | 0    | 0    | 0    | 0    | 0    | 0    |
| Corynebacterium thomsonii                  | 0    | 0    | 0    | 0    | 29   | 0    | 0    | 0    | 0    | 0    | 0    | 0    | 0    | 0    | 0    | 0    | 0    | 0    | 0    | 0    |
| Lachnospiraceae                            | 0    | 0    | 0    | 0    | 0    | 0    | 0    | 0    | 0    | 0    | 0    | 0    | 0    | 0    | 0    | 0    | 0    | 0    | 0    | 0    |
| Corynebacterium tuberculostearicum         | 0    | 0    | 0    | 0    | 0    | 0    | 0    | 0    | 0    | 0    | 0    | 0    | 0    | 0    | 0    | 0    | 0    | 0    | 0    | 0    |
| Dermabacter hominis                        | 0    | 0    | 314  | 0    | 190  | 0    | 0    | 0    | 0    | 0    | 0    | 0    | 0    | 0    | 0    | 0    | 0    | 0    | 0    | 0    |
| Veillonella rogosae                        | 0    | 0    | 0    | 0    | 0    | 0    | 0    | 0    | 0    | 0    | 0    | 0    | 0    | 0    | 0    | 0    | 0    | 0    | 0    | 0    |
| Actinomyces hongkongensis                  | 0    | 0    | 0    | 0    | 0    | 0    | 0    | 0    | 0    | 0    | 0    | 0    | 0    | 0    | 0    | 0    | 0    | 0    | 0    | 0    |
| Veillonella parvula/rogosae                | 0    | 0    | 0    | 0    | 0    | 0    | 0    | 0    | 0    | 0    | 0    | 0    | 0    | 0    | 0    | 0    | 0    | 0    | 0    | 0    |
| Anaerococcus provencensis                  | 0    | 0    | 210  | 0    | 0    | 0    | 0    | 0    | 0    | 0    | 0    | 0    | 0    | 0    | 46   | 0    | 0    | 86   | 0    | 0    |
| Porphyromonas sp. type 1                   | 0    | 0    | 0    | 0    | 0    | 0    | 0    | 0    | 0    | 0    | 0    | 0    | 0    | 0    | 0    | 0    | 0    | 0    | 0    | 0    |
| Brevibacterium paucivorans                 | 0    | 0    | 0    | 65   | 0    | 56   | 0    | 0    | 0    | 0    | 0    | 0    | 0    | 0    | 0    | 0    | 0    | 58   | 0    | 0    |
| Peptostreptococcus                         | 0    | 0    | 0    | 0    | 0    | 0    | 0    | 0    | 0    | 0    | 0    | 0    | 0    | 0    | 0    | 0    | 0    | 0    | 0    | 0    |
| Facklamia languida                         | 0    | 0    | 0    | 0    | 0    | 0    | 0    | 0    | 0    | 0    | 0    | 0    | 0    | 0    | 0    | 0    | 0    | 0    | 0    | 0    |
| Streptobacillus                            | 0    | 0    | 0    | 0    | 0    | 0    | 0    | 0    | 0    | 0    | 0    | 0    | 0    | 0    | 0    | 0    | 0    | 0    | 0    | 0    |
| Gemella haemolysans                        | 0    | 0    | 0    | 0    | 0    | 0    | 0    | 0    | 0    | 0    | 0    | 0    | 57   | 0    | 0    | 0    | 0    | 0    | 0    | 0    |
| Haemophilus sputorum                       | 0    | 0    | 0    | 0    | 0    | 0    | 0    | 0    | 0    | 0    | 0    | 0    | 0    | 0    | 0    | 0    | 0    | 0    | 0    | 0    |
| Actinotignum urinale                       | 0    | 0    | 0    | 0    | 0    | 0    | 0    | 0    | 0    | 0    | 0    | 0    | 0    | 0    | 0    | 0    | 0    | 0    | 0    | 0    |
| Dialister pneumosintes                     | 0    | 0    | 0    | 0    | 0    | 0    | 0    | 0    | 0    | 0    | 0    | 0    | 0    | 0    | 0    | 0    | 0    | 0    | 0    | 0    |
| Treponema pallidum                         | 0    | 0    | 0    | 0    | 0    | 0    | 0    | 0    | 0    | 0    | 0    | 0    | 0    | 0    | 0    | 0    | 0    | 0    | 0    | 0    |
| Porphyromonas bennonis                     | 0    | 0    | 0    | 0    | 0    | 0    | 0    | 0    | 0    | 0    | 0    | 0    | 0    | 0    | 0    | 0    | 0    | 0    | 0    | 0    |
| Bergeyella                                 | 0    | 0    | 0    | 0    | 0    | 0    | 0    | 0    | 0    | 0    | 98   | 0    | 0    | 0    | 0    | 0    | 0    | 0    | 0    | 0    |
| Actinotignum schaalii/timonense            | 0    | 0    | 0    | 0    | 0    | 0    | 0    | 0    | 0    | 0    | 0    | 0    | 0    | 0    | 0    | 0    | 0    | 0    | 0    | 0    |
| Klebsiella aerogenes/Kluyvera cryocrescens | 0    | 0    | 0    | 0    | 0    | 0    | 0    | 0    | 0    | 0    | 0    | 0    | 0    | 0    | 0    | 0    | 0    | 0    | 0    | 0    |
| Rothia mucilaginosus                       | 0    | 0    | 0    | 0    | 0    | 0    | 0    | 86   | 0    | 0    | 0    | 0    | 0    | 0    | 0    | 0    | 0    | 0    | 0    | 0    |
| Solobacterium moorei                       | 0    | 0    | 0    | 0    | 0    | 0    | 0    | 0    | 0    | 0    | 0    | 0    | 0    | 0    | 0    | 0    | 0    | 0    | 0    | 0    |
| Mageeibacillus indolicus                   | 0    | 0    | 0    | 0    | 0    | 0    | 0    | 0    | 0    | 0    | 0    | 0    | 0    | 0    | 0    | 0    | 0    | 0    | 0    | 0    |
| Serratia ureilytica                        | 0    | 0    | 0    | 0    | 0    | 0    | 0    | 0    | 0    | 0    | 0    | 0    | 0    | 0    | 0    | 0    | 0    | 0    | 0    | 0    |
| Peptoniphilus obesi                        | 0    | 0    | 0    | 0    | 0    | 0    | 0    | 0    | 0    | 0    | 0    | 0    | 0    | 0    | 0    | 0    | 0    | 0    | 0    | 0    |
| Peptoniphilus hareii/phocensis             | 0    | 0    | 0    | 339  | 0    | 0    | 0    | 54   | 0    | 0    | 0    | 0    | 0    | 0    | 0    | 0    | 0    | 0    | 0    | 0    |
| Corynebacterium atypicum                   | 0    | 0    | 0    | 0    | 141  | 0    | 0    | 0    | 0    | 0    | 0    | 0    | 0    | 221  | 0    | 0    | 0    | 0    | 0    | 0    |
| Atopobium minutum                          | 0    | 0    | 0    | 0    | 0    | 0    | 0    | 0    | 0    | 0    | 0    | 0    | 0    | 0    | 0    | 0    | 0    | 0    | 0    | 0    |
| Corynebacterium genitalium                 | 0    | 0    | 0    | 0    | 0    | 0    | 0    | 0    | 0    | 0    | 0    | 0    | 0    | 0    | 0    | 0    | 0    | 0    | 0    | 0    |
| Bifidobacterium tsurumiense                | 0    | 0    | 0    | 0    | 0    | 0    | 0    | 0    | 0    | 0    | 0    | 0    | 0    | 0    | 0    | 0    | 0    | 0    | 0    | 0    |
| Micrococcus                                | 0    | 0    | 0    | 0    | 0    | 0    | 0    | 0    | 0    | 0    | 0    | 0    | 0    | 0    | 0    | 0    | 0    | 0    | 0    | 0    |
| Megasphaera genomosp. type_1               | 0    | 0    | 0    | 0    | 0    | 0    | 0    | 0    | 0    | 0    | 0    | 0    | 0    | 0    | 0    | 0    | 0    | 0    | 0    | 0    |
| Enhydrobacter                              | 0    | 0    | 0    | 0    | 0    | 0    | 0    | 0    | 0    | 0    | 0    | 0    | 0    | 0    | 0    | 0    | 0    | 0    | 0    | 0    |
| Fastidiosipila sanguinis                   | 0    | 0    | 0    | 0    | 0    | 0    | 0    | 0    | 0    | 0    | 0    | 0    | 0    | 0    | 0    | 0    | 0    | 0    | 0    | 0    |
| Prevotellamassilia                         | 0    | 0    | 0    | 0    | 0    | 0    | 0    | 0    | 0    | 0    | 0    | 0    | 0    | 0    | 0    | 0    | 0    | 0    | 0    | 0    |
| Peptostreptococcaceae                      | 0    | 0    | 0    | 0    | 0    | 0    | 0    | 0    | 0    | 0    | 0    | 0    | 0    | 0    | 0    | 0    | 0    | 0    | 0    | 0    |
| Morganella morganii                        | 0    | 0    | 0    | 0    | 0    | 0    | 0    | 0    | 0    | 0    | 0    | 0    | 0    | 0    | 0    | 0    | 0    | 0    | 0    | 0    |
| Neofamilia                                 | 0    | 0    | 0    | 0    | 0    | 0    | 0    | 0    | 0    | 0    | 0    | 0    | 0    | 0    | 0    | 0    | 0    | 0    | 0    | 0    |
| Pseudoclavibacter bifida                   | 0    | 0    | 0    | 0    | 0    | 0    | 0    | 0    | 0    | 0    | 0    | 0    | 0    | 0    | 0    | 0    | 0    | 0    | 0    | 0    |
| Helcococcus                                | 0    | 0    | 0    | 0    | 0    | 0    | 0    | 0    | 0    | 0    | 0    | 0    | 0    | 0    | 0    | 0    | 0    | 0    | 0    | 0    |
| Brevibacterium ravenburgense               | 0    | 0    | 0    | 0    | 0    | 0    | 0    | 0    | 0    | 0    | 0    | 0    | 0    | 0    | 0    | 0    | 0    | 0    | 0    | 0    |
| Moryella indoligenes                       | 0    | 0    | 0    | 0    | 0    | 0    | 0    | 0    | 0    | 0    | 0    | 0    | 0    | 0    | 0    | 0    | 0    | 0    | 0    | 0    |
| Olegusella massiliensis                    | 0    | 0    | 0    | 0    | 0    | 0    | 0    | 0    | 0    | 0    | 0    | 0    | 0    | 0    | 0    | 0    | 0    | 0    | 0    | 0    |
| Morococcus cerebrosus                      | 0    | 0    | 0    | 0    | 0    | 0    | 0    | 93   | 0    | 0    | 0    | 0    | 0    | 0    | 0    | 0    | 0    | 0    | 0    | 0    |
| Prevotella scopos                          | 0    | 0    | 0    | 0    | 0    | 0    | 0    | 0    | 0    | 0    | 0    | 0    | 0    | 0    | 0    | 0    | 0    | 0    | 0    | 0    |
| Veillonella parvula/tobetsuensis           | 0    | 0    | 0    | 0    | 0    | 0    | 0    | 0    | 0    | 0    | 0    | 0    | 0    | 0    | 0    | 0    | 0    | 0    | 0    | 0    |
| Moryella                                   | 0    | 0    | 0    | 0    | 0    | 0    | 0    | 0    | 0    | 0    | 0    | 0    | 0    | 0    | 0    | 0    | 0    | 0    | 0    | 0    |
| Atopobium parvulum                         | 0    | 0    | 0    | 0    | 0    | 0    | 0    | 0    | 0    | 0    | 0    | 0    | 0    | 0    | 0    | 0    | 0    | 0    | 0    | 0    |
| Serratia marcescens                        | 0    | 0    | 0    | 0    | 0    | 0    | 0    | 0    | 0    | 0    | 0    | 0    | 0    | 0    | 0    | 0    | 0    | 0    | 0    | 0    |
| Collinsella aerofaciens                    | 0    | 0    | 31   | 0    | 0    | 0    | 0    | 0    | 0    | 0    | 0    | 0    | 0    | 0    | 0    | 0    | 0    | 0    | 0    | 0    |
| Curvibacter                                | 0    | 0    | 0    | 0    | 0    | 0    | 0    | 0    | 0    | 0    | 0    | 0    | 0    | 0    | 0    | 0    | 0    | 0    | 0    | 0    |
| Rothia dentocariosa                        | 0    | 0    | 0    | 0    | 0    | 0    | 0    | 0    | 0    | 0    | 0    | 0    | 0    | 0    | 0    | 0    | 0    | 0    | 0    | 0    |
| Prevotella bergensis                       | 0    | 0    | 0    | 0    | 0    | 0    | 0    | 0    | 0    | 0    | 0    | 0    | 0    | 0    | 0    | 0    | 0    | 0    | 0    | 0    |
| Corynebacterium sundsvallense              | 0    | 0    | 0    | 0    | 0    | 0    | 0    | 0    | 0    | 0    | 0    | 0    | 0    | 0    | 0    | 0    | 0    | 0    | 0    | 0    |

# Samples S411 - S434

| Species                                       | S411 | S412 | S413 | S415 | S416 | S417 | S418 | S419 | S420 | S421 | S422 | S424 | S425 | S426 | S428 | S430 | S431 | S432 | S433 | S434 |
|-----------------------------------------------|------|------|------|------|------|------|------|------|------|------|------|------|------|------|------|------|------|------|------|------|
| Coriobacteriia                                | 0    | 0    | 0    | 0    | 0    | 0    | 0    | 0    | 0    | 0    | 0    | 0    | 0    | 0    | 0    | 0    | 0    | 0    | 0    | 0    |
| Neisseria meningitidis                        | 0    | 0    | 0    | 0    | 0    | 0    | 0    | 0    | 0    | 0    | 0    | 0    | 0    | 0    | 0    | 0    | 0    | 0    | 0    | 0    |
| Dermacoccus nishinomiyaensis                  | 0    | 0    | 0    | 0    | 0    | 0    | 0    | 0    | 0    | 0    | 0    | 0    | 0    | 0    | 0    | 0    | 0    | 0    | 0    | 0    |
| Leptotrichia                                  | 0    | 0    | 0    | 0    | 0    | 0    | 0    | 187  | 0    | 0    | 0    | 0    | 0    | 0    | 0    | 0    | 0    | 0    | 0    | 0    |
| Microbacteriaceae                             | 0    | 0    | 0    | 0    | 0    | 0    | 0    | 0    | 0    | 0    | 0    | 0    | 0    | 0    | 0    | 0    | 0    | 46   | 0    | 0    |
| Klebsiella pneumoniae/varicola                | 0    | 0    | 0    | 0    | 0    | 0    | 0    | 0    | 0    | 0    | 0    | 0    | 0    | 0    | 0    | 0    | 0    | 0    | 0    | 0    |
| Hafnia alvei                                  | 0    | 0    | 0    | 0    | 0    | 0    | 0    | 0    | 0    | 0    | 0    | 0    | 0    | 0    | 0    | 0    | 0    | 0    | 0    | 0    |
| Caulobacter                                   | 0    | 0    | 0    | 0    | 0    | 0    | 0    | 0    | 0    | 0    | 0    | 0    | 0    | 0    | 0    | 0    | 0    | 0    | 0    | 0    |
| Lactobacillus reuteri                         | 0    | 0    | 0    | 0    | 0    | 0    | 0    | 0    | 0    | 0    | 0    | 0    | 0    | 0    | 0    | 0    | 0    | 0    | 0    | 0    |
| Gemella morbillorum                           | 0    | 0    | 0    | 0    | 0    | 0    | 0    | 0    | 0    | 0    | 0    | 0    | 0    | 0    | 0    | 0    | 0    | 0    | 0    | 0    |
| Rothia                                        | 0    | 0    | 0    | 0    | 0    | 0    | 0    | 0    | 0    | 0    | 0    | 0    | 0    | 0    | 0    | 0    | 0    | 0    | 0    | 0    |
| Campylobacter                                 | 0    | 0    | 0    | 0    | 0    | 0    | 0    | 0    | 0    | 0    | 0    | 0    | 0    | 0    | 0    | 0    | 0    | 0    | 0    | 0    |
| Prevotella genogroup 3                        | 0    | 0    | 0    | 0    | 0    | 0    | 0    | 0    | 0    | 0    | 0    | 0    | 0    | 0    | 0    | 0    | 0    | 0    | 0    | 0    |
| Staphylococcus warneri                        | 0    | 0    | 0    | 0    | 0    | 0    | 0    | 0    | 0    | 0    | 0    | 0    | 0    | 0    | 0    | 0    | 0    | 0    | 0    | 0    |
| Blautia wexlerae                              | 0    | 0    | 66   | 0    | 0    | 0    | 0    | 0    | 0    | 0    | 0    | 0    | 0    | 0    | 0    | 0    | 0    | 0    | 0    | 0    |
| Lachnoanaerobaculum                           | 0    | 0    | 0    | 0    | 0    | 0    | 0    | 0    | 0    | 0    | 0    | 0    | 0    | 0    | 0    | 0    | 0    | 0    | 0    | 0    |
| Anaerococcus hydrogenalis/senegalensis        | 0    | 0    | 0    | 0    | 0    | 0    | 0    | 0    | 0    | 0    | 0    | 0    | 0    | 0    | 0    | 0    | 0    | 0    | 0    | 0    |
| Brevibacterium mcbrellneri                    | 0    | 0    | 0    | 0    | 0    | 0    | 0    | 0    | 0    | 0    | 0    | 0    | 0    | 0    | 0    | 0    | 0    | 0    | 0    | 0    |
| Corynebacterium glaucum                       | 0    | 0    | 0    | 0    | 0    | 0    | 0    | 0    | 0    | 0    | 0    | 0    | 0    | 0    | 0    | 0    | 0    | 0    | 0    | 0    |
| Prevotella salivae                            | 0    | 0    | 0    | 0    | 0    | 0    | 0    | 0    | 0    | 0    | 0    | 0    | 0    | 0    | 0    | 0    | 0    | 0    | 0    | 0    |
| Coriobacteriaceae                             | 0    | 0    | 0    | 0    | 0    | 0    | 0    | 0    | 0    | 0    | 0    | 0    | 0    | 0    | 0    | 0    | 0    | 0    | 0    | 0    |
| Bulleidia                                     | 0    | 0    | 0    | 0    | 0    | 0    | 0    | 0    | 0    | 0    | 0    | 0    | 0    | 0    | 0    | 0    | 0    | 0    | 0    | 0    |
| Peptococcus                                   | 0    | 0    | 0    | 0    | 0    | 0    | 0    | 0    | 0    | 0    | 0    | 0    | 0    | 0    | 0    | 0    | 0    | 0    | 0    | 0    |
| Serratia marcescens/nematodiphila             | 0    | 0    | 0    | 0    | 0    | 0    | 0    | 0    | 0    | 0    | 0    | 0    | 0    | 0    | 0    | 0    | 0    | 0    | 0    | 0    |
| Leptotrichia wadei                            | 0    | 0    | 0    | 0    | 0    | 0    | 0    | 66   | 0    | 0    | 0    | 0    | 0    | 0    | 0    | 0    | 0    | 0    | 0    | 0    |
| Neisseriaceae                                 | 0    | 0    | 0    | 0    | 0    | 0    | 0    | 0    | 0    | 0    | 0    | 0    | 0    | 0    | 0    | 0    | 0    | 0    | 0    | 0    |
| Aerococcus sanguinicola                       | 0    | 0    | 0    | 0    | 0    | 0    | 0    | 0    | 0    | 0    | 0    | 0    | 0    | 0    | 0    | 0    | 0    | 0    | 0    | 0    |
| Criobacterium bergeronii                      | 0    | 0    | 0    | 0    | 0    | 0    | 0    | 0    | 0    | 0    | 0    | 0    | 0    | 0    | 0    | 0    | 0    | 0    | 0    | 0    |
| Brevibacterium luteolum                       | 0    | 0    | 0    | 0    | 0    | 0    | 0    | 0    | 0    | 0    | 0    | 0    | 0    | 0    | 0    | 0    | 0    | 0    | 0    | 0    |
| Klebsiella pneumoniae                         | 0    | 0    | 0    | 0    | 0    | 0    | 0    | 0    | 0    | 0    | 0    | 0    | 0    | 0    | 0    | 0    | 0    | 0    | 0    | 0    |
| Actinomyces oris/viscosus                     | 0    | 0    | 0    | 0    | 0    | 0    | 0    | 0    | 0    | 0    | 0    | 0    | 0    | 0    | 0    | 0    | 0    | 0    | 0    | 0    |
| Mycobacterium chelonae complex                | 0    | 0    | 0    | 0    | 0    | 0    | 0    | 0    | 0    | 0    | 0    | 0    | 0    | 0    | 0    | 0    | 0    | 0    | 0    | 0    |
| Corynebacterium jeddahense                    | 0    | 0    | 0    | 0    | 0    | 0    | 0    | 0    | 0    | 0    | 0    | 0    | 0    | 0    | 0    | 0    | 0    | 0    | 0    | 0    |
| Peptostreptococcus stomatis                   | 0    | 0    | 0    | 0    | 0    | 0    | 0    | 0    | 0    | 0    | 0    | 0    | 0    | 0    | 0    | 0    | 0    | 0    | 0    | 0    |
| Megasphaera                                   | 0    | 0    | 0    | 0    | 0    | 0    | 0    | 0    | 0    | 0    | 0    | 0    | 0    | 0    | 0    | 0    | 0    | 0    | 0    | 0    |
| Campylobacter rectus/showae                   | 0    | 0    | 0    | 0    | 0    | 0    | 0    | 0    | 0    | 0    | 0    | 0    | 0    | 0    | 0    | 0    | 0    | 0    | 0    | 0    |
| Staphylococcus carnosus/condimenti            | 0    | 0    | 0    | 0    | 0    | 0    | 0    | 0    | 0    | 0    | 0    | 0    | 0    | 0    | 0    | 0    | 0    | 0    | 0    | 0    |
| Prevotella pallens                            | 0    | 0    | 0    | 0    | 0    | 0    | 0    | 0    | 0    | 0    | 0    | 0    | 0    | 0    | 0    | 0    | 0    | 0    | 0    | 0    |
| Prolinoborus fasciculus/Acinetobacter lwoffii | 0    | 35   | 0    | 0    | 0    | 0    | 0    | 0    | 0    | 0    | 0    | 0    | 0    | 0    | 0    | 0    | 0    | 0    | 0    | 0    |
| Staphylococcus nepalensis                     | 0    | 0    | 0    | 0    | 0    | 0    | 0    | 0    | 0    | 0    | 0    | 0    | 0    | 0    | 0    | 0    | 0    | 0    | 0    | 0    |
| Staphylococcaceae                             | 0    | 0    | 0    | 0    | 0    | 0    | 0    | 0    | 0    | 0    | 0    | 0    | 0    | 0    | 0    | 0    | 0    | 0    | 0    | 0    |
| Cruoricaptor                                  | 0    | 0    | 0    | 0    | 0    | 0    | 0    | 0    | 0    | 0    | 0    | 0    | 0    | 0    | 0    | 0    | 0    | 0    | 0    | 0    |
| [Eubacterium] hallii                          | 0    | 0    | 63   | 0    | 0    | 0    | 0    | 0    | 0    | 0    | 0    | 0    | 0    | 0    | 0    | 0    | 0    | 0    | 0    | 0    |
| BVAB1 (species)                               | 0    | 0    | 0    | 0    | 0    | 0    | 0    | 0    | 0    | 0    | 0    | 0    | 0    | 0    | 0    | 0    | 0    | 0    | 0    | 0    |
| Stomatobaculum                                | 0    | 0    | 0    | 0    | 0    | 0    | 0    | 0    | 0    | 0    | 0    | 0    | 0    | 0    | 0    | 0    | 0    | 0    | 0    | 0    |
| Mycoplasma                                    | 0    | 0    | 0    | 0    | 0    | 0    | 0    | 0    | 0    | 0    | 0    | 0    | 0    | 0    | 0    | 0    | 0    | 0    | 0    | 0    |
| Catenibacterium mitsuokai                     | 0    | 0    | 35   | 0    | 0    | 0    | 0    | 0    | 0    | 0    | 0    | 0    | 0    | 0    | 0    | 0    | 0    | 0    | 0    | 0    |
| Veillonella parvula                           | 0    | 0    | 0    | 0    | 0    | 0    | 0    | 0    | 0    | 0    | 0    | 0    | 0    | 0    | 0    | 0    | 0    | 0    | 0    | 0    |
| Corynebacterium kroppenstedtii                | 0    | 0    | 0    | 0    | 0    | 0    | 0    | 0    | 0    | 0    | 0    | 0    | 0    | 0    | 0    | 0    | 0    | 0    | 0    | 0    |
| Eremococcus coleocola                         | 0    | 0    | 0    | 0    | 0    | 0    | 0    | 0    | 0    | 0    | 0    | 0    | 0    | 0    | 0    | 0    | 0    | 0    | 0    | 0    |
| Actinomyces europaeus                         | 0    | 0    | 0    | 0    | 0    | 0    | 0    | 0    | 0    | 0    | 0    | 0    | 0    | 0    | 0    | 0    | 0    | 0    | 0    | 0    |
| Peptoniphilus senegalensis                    | 0    | 0    | 0    | 0    | 0    | 0    | 0    | 0    | 0    | 0    | 0    | 0    | 0    | 0    | 0    | 0    | 0    | 0    | 0    | 0    |
| Corynebacterium afermentans/humii             | 0    | 0    | 0    | 0    | 0    | 0    | 0    | 0    | 0    | 0    | 0    | 0    | 0    | 0    | 0    | 0    | 0    | 0    | 0    | 0    |
| Acinetobacter                                 | 0    | 0    | 0    | 0    | 0    | 0    | 0    | 0    | 0    | 0    | 0    | 0    | 0    | 0    | 0    | 0    | 0    | 0    | 0    | 0    |
| Eggerthellaceae                               | 0    | 0    | 0    | 0    | 0    | 0    | 0    | 0    | 0    | 0    | 0    | 0    | 0    | 0    | 0    | 0    | 0    | 0    | 0    | 0    |
| Corynebacterium mucifaciens                   | 0    | 0    | 0    | 0    | 0    | 0    | 0    | 0    | 0    | 0    | 0    | 0    | 106  | 0    | 0    | 0    | 0    | 0    | 0    | 0    |
| Filifactor                                    | 0    | 0    | 0    | 0    | 0    | 0    | 0    | 0    | 0    | 0    | 0    | 0    | 0    | 0    | 0    | 0    | 0    | 0    | 0    | 0    |
| Ruminococcus faecis                           | 0    | 0    | 26   | 0    | 0    | 0    | 0    | 0    | 0    | 0    | 0    | 0    | 0    | 0    | 0    | 0    | 0    | 0    | 0    | 0    |
| Lactobacillus                                 | 0    | 0    | 0    | 0    | 0    | 0    | 0    | 0    | 0    | 0    | 0    | 0    | 0    | 0    | 0    | 0    | 0    | 0    | 0    | 0    |
| Peptoniphilus grossensis/rhinitidis           | 0    | 0    | 0    | 0    | 0    | 0    | 0    | 0    | 0    | 0    | 0    | 0    | 0    | 214  | 0    | 0    | 0    | 0    | 0    | 0    |
| Aerococcus urinaeaequi/viridans               | 0    | 0    | 0    | 0    | 0    | 0    | 0    | 0    | 0    | 0    | 0    | 0    | 0    | 0    | 0    | 0    | 0    | 0    | 0    | 0    |
| Anaerostipes hadrus                           | 0    | 0    | 194  | 0    | 0    | 0    | 0    | 0    | 0    | 0    | 0    | 0    | 0    | 0    | 0    | 0    | 0    | 0    | 0    | 0    |
| Lagierella                                    | 0    | 0    | 0    | 0    | 0    | 0    | 0    | 0    | 0    | 0    | 0    | 0    | 0    | 0    | 0    | 0    | 0    | 0    | 0    | 0    |
| Neisseria cinerea/meningitidis                | 0    | 0    | 0    | 0    | 0    | 0    | 0    | 0    | 0    | 0    | 0    | 0    | 0    | 0    | 0    | 0    | 0    | 0    | 0    | 0    |
| Micrococcus lylae                             | 0    | 0    | 0    | 0    | 0    | 0    | 0    | 0    | 0    | 0    | 0    | 0    | 0    | 0    | 0    | 0    | 0    | 0    | 0    | 0    |
| Staphylococcus cohnii                         | 0    | 0    | 0    | 0    | 0    | 0    | 0    | 0    | 0    | 0    | 0    | 0    | 0    | 0    | 0    | 0    | 0    | 0    | 0    | 0    |
| Casaltella massiliensis                       | 0    | 0    | 0    | 0    | 0    | 0    | 0    | 0    | 0    | 0    | 0    | 0    | 0    | 0    | 0    | 0    | 0    | 0    | 0    | 0    |
| Stomatobaculum longum                         | 0    | 0    | 0    | 0    | 0    | 0    | 0    | 0    | 0    | 0    | 0    | 0    | 0    | 0    | 0    | 0    | 0    | 0    | 0    | 0    |
| Lautropia                                     | 0    | 0    | 0    | 0    | 0    | 0    | 0    | 0    | 0    | 0    | 0    | 0    | 0    | 0    | 0    | 0    | 0    | 0    | 0    | 0    |
| Fastidiosipila                                | 0    | 0    | 0    | 0    | 0    | 0    | 0    | 0    | 0    | 0    | 0    | 0    | 0    | 0    | 0    | 0    | 0    | 0    | 0    | 0    |

# Samples S411 - S434

| Species                                      | S411 | S412 | S413 | S415 | S416 | S417 | S418 | S419 | S420 | S421 | S422 | S424 | S425 | S426 | S428 | S430 | S431 | S432 | S433 | S434 |
|----------------------------------------------|------|------|------|------|------|------|------|------|------|------|------|------|------|------|------|------|------|------|------|------|
| Corynebacterium durum                        | 0    | 0    | 0    | 0    | 0    | 0    | 0    | 0    | 0    | 0    | 0    | 0    | 0    | 0    | 0    | 0    | 0    | 0    | 0    | 0    |
| Actinomyces graevenitzii                     | 0    | 0    | 0    | 0    | 0    | 0    | 0    | 0    | 0    | 0    | 0    | 0    | 0    | 0    | 0    | 0    | 0    | 0    | 0    | 0    |
| Staphylococcus cohnii/saprophyticus          | 0    | 0    | 0    | 0    | 0    | 0    | 0    | 0    | 0    | 0    | 0    | 0    | 0    | 0    | 0    | 0    | 0    | 26   | 0    | 0    |
| Leptotrichia trevisanii                      | 0    | 0    | 0    | 0    | 0    | 0    | 0    | 0    | 0    | 0    | 0    | 0    | 0    | 0    | 0    | 0    | 0    | 0    | 0    | 0    |
| Candidatus Paraburkholderia calva            | 0    | 0    | 0    | 0    | 0    | 0    | 0    | 0    | 0    | 0    | 0    | 0    | 0    | 0    | 0    | 0    | 0    | 0    | 0    | 0    |
| Actinomyces urogenitalis                     | 0    | 0    | 0    | 0    | 0    | 0    | 0    | 0    | 0    | 0    | 0    | 0    | 0    | 0    | 0    | 0    | 0    | 0    | 0    | 0    |
| Clostridiales                                | 0    | 0    | 0    | 0    | 0    | 0    | 0    | 0    | 0    | 0    | 0    | 0    | 0    | 0    | 0    | 0    | 0    | 0    | 0    | 0    |
| Pasteurella caballi                          | 0    | 0    | 0    | 0    | 0    | 0    | 0    | 0    | 0    | 0    | 0    | 0    | 0    | 0    | 0    | 0    | 0    | 0    | 0    | 0    |
| Fusobacterium hwasookii/nucleatum            | 0    | 0    | 0    | 0    | 0    | 0    | 0    | 0    | 0    | 0    | 0    | 0    | 0    | 0    | 0    | 0    | 0    | 0    | 0    | 0    |
| Corynebacterium riegliei                     | 0    | 0    | 0    | 0    | 0    | 0    | 0    | 0    | 0    | 0    | 0    | 0    | 0    | 0    | 0    | 0    | 0    | 0    | 0    | 0    |
| Hafnia                                       | 0    | 0    | 0    | 0    | 0    | 0    | 0    | 0    | 0    | 0    | 0    | 0    | 0    | 0    | 0    | 0    | 0    | 0    | 0    | 0    |
| Staphylococcus equorum/saprophyticus/xylosus | 0    | 0    | 0    | 0    | 0    | 0    | 0    | 0    | 0    | 0    | 0    | 0    | 0    | 0    | 0    | 0    | 0    | 0    | 0    | 0    |
| Acinetobacter lwoffii                        | 0    | 0    | 0    | 0    | 0    | 0    | 0    | 0    | 0    | 0    | 0    | 0    | 0    | 0    | 0    | 0    | 0    | 0    | 0    | 0    |
| Micrococcus cohnii                           | 0    | 0    | 0    | 0    | 0    | 0    | 0    | 0    | 0    | 0    | 0    | 0    | 0    | 0    | 0    | 0    | 0    | 0    | 0    | 0    |
| Pseudoclavibacter faecalis                   | 0    | 0    | 0    | 0    | 0    | 0    | 0    | 0    | 0    | 0    | 0    | 0    | 0    | 0    | 0    | 0    | 0    | 0    | 0    | 0    |
| Leptotrichia buccalis                        | 0    | 0    | 0    | 0    | 0    | 0    | 0    | 0    | 0    | 0    | 0    | 0    | 0    | 0    | 0    | 0    | 0    | 0    | 0    | 0    |
| Actinomyces                                  | 0    | 0    | 0    | 0    | 0    | 0    | 25   | 0    | 0    | 0    | 0    | 0    | 0    | 0    | 0    | 0    | 0    | 0    | 0    | 0    |
| Fusobacterium nucleatum/periodonticum        | 0    | 0    | 0    | 0    | 0    | 0    | 0    | 0    | 0    | 0    | 0    | 0    | 0    | 0    | 0    | 0    | 0    | 0    | 0    | 0    |
| Lactobacillus saerimneri                     | 0    | 0    | 0    | 0    | 0    | 0    | 0    | 0    | 0    | 0    | 0    | 0    | 0    | 0    | 0    | 0    | 0    | 0    | 0    | 0    |
| Actinomycetaceae                             | 0    | 0    | 0    | 0    | 0    | 0    | 0    | 0    | 0    | 0    | 0    | 0    | 0    | 0    | 0    | 0    | 0    | 0    | 0    | 0    |
| Dialister                                    | 0    | 0    | 0    | 0    | 0    | 0    | 0    | 0    | 0    | 0    | 0    | 0    | 0    | 0    | 0    | 0    | 0    | 0    | 0    | 0    |
| Neisseria mucosa/subflava                    | 0    | 0    | 0    | 0    | 0    | 0    | 0    | 0    | 0    | 0    | 0    | 0    | 0    | 0    | 0    | 0    | 0    | 0    | 0    | 0    |
| Paracoccus                                   | 0    | 0    | 0    | 0    | 0    | 0    | 0    | 0    | 0    | 0    | 0    | 0    | 0    | 0    | 0    | 0    | 0    | 0    | 0    | 0    |
| Acinetobacter haemolyticus/johnsonii         | 0    | 0    | 0    | 0    | 0    | 0    | 0    | 0    | 0    | 0    | 0    | 0    | 0    | 0    | 0    | 0    | 0    | 0    | 0    | 0    |
| Neisseria subflava                           | 0    | 0    | 0    | 0    | 0    | 0    | 0    | 0    | 0    | 0    | 0    | 0    | 0    | 0    | 0    | 0    | 0    | 0    | 0    | 0    |
| Acinetobacter proteolyticus                  | 0    | 0    | 0    | 0    | 0    | 0    | 0    | 0    | 0    | 0    | 0    | 0    | 0    | 0    | 0    | 0    | 0    | 0    | 0    | 0    |
| Dorea formicigenerans                        | 0    | 0    | 32   | 0    | 0    | 0    | 0    | 0    | 0    | 0    | 0    | 0    | 0    | 0    | 0    | 0    | 0    | 0    | 0    | 0    |
| Corynebacterium tuscaniense                  | 0    | 0    | 0    | 0    | 0    | 0    | 0    | 0    | 0    | 0    | 0    | 0    | 0    | 0    | 0    | 0    | 0    | 0    | 0    | 0    |
| Massiliomicrobiota timonensis                | 0    | 0    | 75   | 0    | 0    | 0    | 0    | 0    | 0    | 0    | 0    | 0    | 0    | 0    | 0    | 0    | 0    | 0    | 0    | 0    |
| Fusobacterium hwasookii                      | 0    | 0    | 0    | 0    | 0    | 0    | 0    | 0    | 0    | 0    | 0    | 0    | 0    | 0    | 0    | 0    | 0    | 0    | 0    | 0    |
| Pseudoglutamicibacter albus                  | 0    | 0    | 0    | 0    | 0    | 0    | 0    | 0    | 0    | 0    | 0    | 0    | 0    | 0    | 0    | 0    | 0    | 0    | 0    | 0    |
| Clostridiales Family XIII. Incertae Sedis    | 0    | 0    | 0    | 0    | 0    | 0    | 0    | 0    | 0    | 0    | 0    | 0    | 0    | 0    | 0    | 0    | 0    | 0    | 0    | 0    |
| Kocuria marina/rhizophila                    | 0    | 0    | 0    | 0    | 0    | 0    | 0    | 0    | 0    | 0    | 0    | 0    | 0    | 0    | 0    | 0    | 0    | 0    | 0    | 0    |
| Kocuria                                      | 0    | 0    | 0    | 0    | 0    | 0    | 0    | 0    | 0    | 0    | 0    | 0    | 0    | 0    | 0    | 0    | 0    | 0    | 0    | 0    |
| Alloprevotella rava                          | 0    | 0    | 0    | 0    | 0    | 0    | 0    | 0    | 0    | 0    | 0    | 0    | 0    | 0    | 0    | 0    | 0    | 0    | 0    | 0    |
| Staphylococcus pettenkoferi                  | 0    | 0    | 0    | 0    | 0    | 0    | 0    | 0    | 0    | 0    | 0    | 0    | 0    | 0    | 0    | 0    | 0    | 0    | 0    | 0    |
| Streptococcus pseudoporcinus                 | 0    | 0    | 0    | 0    | 0    | 0    | 0    | 0    | 0    | 0    | 0    | 0    | 0    | 0    | 0    | 0    | 0    | 0    | 0    | 0    |
| Kingella                                     | 0    | 0    | 0    | 0    | 0    | 0    | 0    | 0    | 0    | 0    | 0    | 0    | 0    | 0    | 0    | 0    | 0    | 0    | 0    | 0    |
| Eikenella                                    | 0    | 0    | 0    | 0    | 0    | 0    | 0    | 0    | 0    | 0    | 0    | 0    | 0    | 0    | 0    | 0    | 0    | 0    | 0    | 0    |
| Actinomyces odontolyticus                    | 0    | 0    | 0    | 0    | 0    | 0    | 0    | 0    | 0    | 0    | 0    | 0    | 0    | 0    | 0    | 0    | 0    | 0    | 0    | 0    |
| Corynebacterium sphenisci                    | 0    | 0    | 0    | 0    | 0    | 0    | 0    | 0    | 0    | 0    | 0    | 0    | 0    | 0    | 0    | 0    | 0    | 0    | 0    | 0    |
| Cutibacterium                                | 0    | 0    | 0    | 0    | 0    | 0    | 0    | 0    | 0    | 0    | 0    | 0    | 0    | 0    | 0    | 0    | 0    | 0    | 0    | 0    |
| Staphylococcus xylosus                       | 0    | 0    | 0    | 0    | 0    | 0    | 0    | 0    | 0    | 0    | 0    | 0    | 0    | 0    | 0    | 0    | 0    | 0    | 0    | 0    |
| Burkholderiales                              | 0    | 0    | 0    | 0    | 0    | 0    | 0    | 0    | 0    | 0    | 0    | 0    | 0    | 0    | 0    | 0    | 0    | 0    | 0    | 0    |
| Massiliomicrobiota/Mycoplasma                | 0    | 0    | 0    | 0    | 0    | 0    | 0    | 0    | 0    | 0    | 0    | 0    | 0    | 0    | 0    | 0    | 0    | 0    | 0    | 0    |
| Bacteroidales                                | 0    | 0    | 0    | 0    | 0    | 0    | 0    | 0    | 0    | 0    | 0    | 0    | 0    | 0    | 0    | 0    | 0    | 0    | 0    | 0    |
| Campylobacter fetus                          | 0    | 45   | 0    | 0    | 0    | 0    | 0    | 0    | 0    | 0    | 0    | 0    | 0    | 0    | 0    | 0    | 0    | 0    | 0    | 0    |
| Prevotella aurantiaca                        | 0    | 0    | 0    | 0    | 0    | 0    | 0    | 0    | 0    | 0    | 0    | 0    | 0    | 0    | 0    | 0    | 0    | 0    | 0    | 0    |
| Corynebacterium freneyi/xerosis              | 0    | 0    | 0    | 0    | 0    | 0    | 0    | 0    | 0    | 0    | 0    | 0    | 0    | 0    | 0    | 0    | 0    | 0    | 0    | 0    |
| Aerococcaceae                                | 0    | 0    | 0    | 0    | 0    | 0    | 0    | 0    | 0    | 0    | 0    | 0    | 0    | 0    | 0    | 0    | 0    | 0    | 0    | 0    |
| Moraxella lacunata                           | 0    | 0    | 0    | 0    | 0    | 0    | 0    | 0    | 0    | 0    | 0    | 0    | 0    | 0    | 0    | 0    | 0    | 0    | 0    | 0    |
| Corynebacterium accolens/macginleyi          | 0    | 0    | 0    | 0    | 0    | 0    | 0    | 0    | 0    | 0    | 0    | 0    | 0    | 0    | 0    | 0    | 0    | 0    | 0    | 0    |
| Massilia aurea                               | 0    | 0    | 0    | 0    | 0    | 0    | 0    | 0    | 0    | 0    | 0    | 0    | 0    | 0    | 0    | 0    | 0    | 0    | 0    | 0    |
| Corynebacterium casei                        | 0    | 0    | 0    | 0    | 0    | 0    | 0    | 0    | 0    | 0    | 0    | 0    | 0    | 0    | 0    | 0    | 0    | 0    | 0    | 0    |
| Helcococcus sueciensis                       | 0    | 0    | 0    | 0    | 0    | 0    | 0    | 0    | 0    | 0    | 0    | 0    | 0    | 0    | 0    | 0    | 0    | 0    | 0    | 0    |
| Lactobacillus casei/rhamnosus                | 0    | 0    | 0    | 0    | 0    | 0    | 0    | 0    | 0    | 0    | 0    | 0    | 0    | 0    | 0    | 0    | 0    | 0    | 0    | 0    |
| Holdemanella biformis                        | 0    | 0    | 32   | 0    | 0    | 0    | 0    | 0    | 0    | 0    | 0    | 0    | 0    | 0    | 0    | 0    | 0    | 0    | 0    | 0    |
| Pelistega                                    | 0    | 0    | 0    | 0    | 0    | 0    | 0    | 0    | 0    | 0    | 0    | 0    | 0    | 0    | 0    | 0    | 0    | 0    | 0    | 0    |
| Actinomyces massiliensis                     | 0    | 0    | 0    | 0    | 0    | 0    | 0    | 0    | 0    | 0    | 0    | 0    | 0    | 0    | 0    | 0    | 0    | 0    | 0    | 0    |
| Massilia                                     | 0    | 0    | 0    | 0    | 0    | 0    | 0    | 0    | 0    | 0    | 0    | 0    | 0    | 0    | 0    | 0    | 0    | 0    | 0    | 0    |
| Staphylococcus equorum/xylosus               | 0    | 0    | 0    | 0    | 0    | 0    | 0    | 0    | 0    | 0    | 0    | 0    | 0    | 0    | 0    | 0    | 0    | 0    | 0    | 0    |
| Streptococcus                                | 0    | 0    | 0    | 0    | 0    | 0    | 0    | 0    | 0    | 0    | 0    | 0    | 0    | 0    | 0    | 0    | 0    | 0    | 0    | 0    |
| Cutibacterium avidum                         | 0    | 0    | 0    | 0    | 0    | 0    | 0    | 0    | 0    | 0    | 0    | 0    | 0    | 0    | 0    | 0    | 0    | 0    | 0    | 0    |
