# Supplementary material
Source: PubMed Central journal article supplement (PMC8492123)
Supplement: ciaa1123_suppl_supplementary_table_04.pdf [file ciaa1123_suppl_supplementary_table_04.pdf]

Supplementary Table 4. Characteristics of 431 Participants with and without *Mycoplasma penetrans* Separately by Sex of Sex Partners

| Characteristic*                                 | MSM                     |                     |              | MSW                     |                    |          |
|-------------------------------------------------|-------------------------|---------------------|--------------|-------------------------|--------------------|----------|
|                                                 | No MP<br>N=181<br>n (%) | MP<br>N=18<br>n (%) | P-value†     | No MP<br>N=227<br>n (%) | MP<br>N=5<br>n (%) | P-value† |
| <i>Demographic</i>                              |                         |                     |              |                         |                    |          |
| Gender                                          |                         |                     |              |                         |                    |          |
| Transgender                                     | 2 (1)                   | 0 (0)               | 1.000        | 0 (0)                   | 0 (0)              | -        |
| Cisgender                                       | 179 (99)                | 18 (100)            |              | 227 (100)               | 5 (100)            |          |
| Age, median (IQR)                               | 30 (27-40)              | 30 (27-36)          | 0.674‡       | 32 (27-37)              | 30 (29-33)         | 0.893‡   |
| Race                                            |                         |                     |              |                         |                    |          |
| White                                           | 118 (65)                | 13 (72)             | 0.915        | 123 (54)                | 2 (40)             | 0.316    |
| Black                                           | 12 (7)                  | 1 (6)               |              | 60 (26)                 | 3 (60)             |          |
| Other/Multiple/Unknown                          | 51 (28)                 | 4 (22)              |              | 44 (19)                 | 0 (0)              |          |
| Hispanic or Latino ethnicity                    |                         |                     |              |                         |                    |          |
| Yes                                             | 36 (20)                 | 3 (17)              | 1.000        | 20 (9)                  | 0 (0)              | 1.000    |
| No                                              | 140 (77)                | 15 (83)             |              | 198 (87)                | 5 (100)            |          |
| Unknown                                         | 5 (3)                   | 0 (0)               |              | 9 (4)                   | 0 (0)              |          |
| Education completed                             |                         |                     |              |                         |                    |          |
| ≤High School or GED                             | 65 (36)                 | 4 (22)              | 0.306        | 95 (42)                 | 3 (60)             | 0.845    |
| Some college                                    | 35 (19)                 | 6 (33)              |              | 46 (21)                 | 1 (20)             |          |
| College graduate                                | 80 (44)                 | 8 (44)              |              | 83 (37)                 | 1 (20)             |          |
| <i>Behavioral</i>                               |                         |                     |              |                         |                    |          |
| Number sex partners past 2 months, median (IQR) | 3 (2-5.5)               | 3 (3-5)             | 0.418‡       | 2 (1-2)                 | 2 (2-2)            | 0.399‡   |
| New sex partner past 2 months                   | 140 (79)                | 17 (94)             | 0.207        | 156 (70)                | 3 (60)             | 0.643    |
| Behaviors at last sexual episode§               |                         |                     |              |                         |                    |          |
| Vaginal sex                                     | -                       | -                   | -            | 215 (95)                | 5 (100)            | 1.000    |
| Insertive oral sex                              | 130 (73)                | 14 (78)             | 0.785        | 118 (52)                | 5 (100)            | 0.062    |
| Insertive anal sex                              | 102 (57)                | 13 (72)             | 0.316        | 5 (2)                   | 0 (0)              | 1.000    |
| Always uses condoms with last sex partner       | 35 (20)                 | 6 (35)              | 0.210        | 47 (21)                 | 0 (0)              | 0.586    |
| <i>History</i>                                  |                         |                     |              |                         |                    |          |
| Reason for visit¶                               |                         |                     |              |                         |                    |          |
| Urethral symptoms                               | 79 (44)                 | 15 (83)             | <b>0.002</b> | 95 (42)                 | 2 (40)             | 1.000    |
| Other symptoms                                  | 6 (3)                   | 0 (0)               | 1.000        | 26 (11)                 | 0 (0)              | 1.000    |
| STD Testing                                     | 134 (74)                | 11 (61)             | 0.269        | 165 (73)                | 4 (80)             | 1.000    |
| History of previous STD                         |                         |                     |              |                         |                    |          |
| History of NGU                                  | 41 (23)                 | 3 (17)              | 0.768        | 27 (12)                 | 0 (0)              | 1.000    |
| History of chlamydial infection                 | 100 (56)                | 9 (50)              | 0.628        | 65 (29)                 | 1 (20)             | 1.000    |
| History of gonococcal infection                 | 95 (53)                 | 10 (56)             | 1.000        | 35 (15)                 | 0 (0)              | 1.000    |
| Known HIV-positive                              | 14 (8)                  | 1 (6)               | 1.000        | 0 (0)                   | 0 (0)              | -        |
| HIV pre-exposure prophylaxis use¶               | 28 (17)                 | 3 (18)              | 1.000        | 0 (0)                   | 0 (0)              | -        |
| <i>Presentation</i>                             |                         |                     |              |                         |                    |          |
| Urethral symptoms                               | 98 (54)                 | 17 (94)             | <b>0.001</b> | 105 (46)                | 4 (80)             | 0.190    |
| Visible urethral discharge                      | 100 (55)                | 17 (94)             | <b>0.001</b> | 103 (45)                | 3 (60)             | 0.662    |
| PMNs/HPF on a urethral Gram stain               |                         |                     |              |                         |                    |          |
| 0-4                                             | 69 (38)                 | 1 (6)               | <b>0.001</b> | 111 (49)                | 1 (20)             | 0.163    |
| 5-9                                             | 25 (14)                 | 0 (0)               |              | 28 (12)                 | 2 (40)             |          |
| ≥10                                             | 87 (48)                 | 17 (94)             |              | 88 (39)                 | 2 (40)             |          |

| Characteristic*                      | MSM                     |                     |              | MSW                     |                    |          |
|--------------------------------------|-------------------------|---------------------|--------------|-------------------------|--------------------|----------|
|                                      | No MP<br>N=181<br>n (%) | MP<br>N=18<br>n (%) | P-value†     | No MP<br>N=227<br>n (%) | MP<br>N=5<br>n (%) | P-value† |
| NGU                                  | 112 (62)                | 17 (94)             | <b>0.004</b> | 116 (51)                | 4 (80)             | 0.371    |
| <i>Urethral pathogen detection</i>   |                         |                     |              |                         |                    |          |
| <i>Chlamydia trachomatis</i> (NAAT)  | 38 (21)                 | 3 (17)              | 1.000        | 32 (14)                 | 1 (20)             | 0.539    |
| <i>Mycoplasma genitalium</i> (NAAT)  | 32 (18)                 | 0 (0)               | 0.084        | 25 (11)                 | 0 (0)              | 1.000    |
| Herpes simplex virus (qPCR)          | 1 (1)                   | 0 (0)               | 1.000        | 3 (1)                   | 0 (0)              | 1.000    |
| Adenovirus (qPCR)                    | 5 (3)                   | 0 (0)               | 1.000        | 3 (1)                   | 0 (0)              | 1.000    |
| <i>Trichomonas vaginalis</i> (qPCR)  | 1 (1)                   | 0 (0)               | 1.000        | 13 (6)                  | 0 (0)              | 1.000    |
| <i>Haemophilus influenzae</i> (qPCR) | 17 (9)                  | 0 (0)               | 0.374        | 20 (9)                  | 1 (20)             | 1.000    |
| <i>Ureaplasma urealyticum</i> (qPCR) | 33 (18)                 | 6 (33)              | 0.129        | 53 (23)                 | 3 (60)             | 0.092    |

Abbreviation: GED, General Education Diploma; HIV, human immunodeficiency virus; HPF, high-power field; IQR, interquartile range; MP, *Mycoplasma penetrans*; MSM, cisgender men who have sex with men only; MSW, cisgender men who have sex with women only; NAAT, nucleic acid amplification test; NGU, nongonococcal urethritis; PMN, polymorphonuclear leukocyte; STD, sexually transmitted disease; TGWSM, transgender women who have sex with men only.

\*n=4 missing education completed, n=18 missing ever had sex with a man, n=32 missing number sex partners past 2 months, n=7 missing new sex partner past 2 months, n=1 missing vaginal sex at last sex, n=4 missing insertive oral sex at last sex, n=4 missing insertive anal at last sex, n=13 missing recent condom use with last sex partner, n=1 missing reason for visit is STD testing, n=4 missing history of NGU, n=4 missing history of chlamydial infection, and n=3 missing history of gonococcal infection. Participants with missing herpes simplex virus and adenovirus test results (n=16) were assumed to be negative for both pathogens.

†Fisher's exact test unless otherwise specified. Bold indicates significance at alpha=0.05 level.

‡Wilcoxon rank-sum test.

§Not mutually exclusive categories.

\*Multiple reasons for visit possible. Other symptoms include genital lesions/rash, non-genital rash, anorectal symptoms, testicular symptoms, oral/pharyngeal symptoms, and other symptoms.

‡Among participants who were not known to be HIV-positive.
