# Supplementary material
Source: PubMed Central journal article supplement (PMC8492123)
Supplement: ciaa1123_suppl_supplementary_table_05.pdf [file ciaa1123_suppl_supplementary_table_05.pdf]

Supplementary Table 5. Characteristics of 431 Participants with and without *Haemophilus influenzae* Separately by Sex of Sex Partners

| Characteristic*                                 | MSM                     |                     |                      | MSW                     |                     |                      |
|-------------------------------------------------|-------------------------|---------------------|----------------------|-------------------------|---------------------|----------------------|
|                                                 | No HI<br>N=182<br>n (%) | HI<br>N=17<br>n (%) | P-value <sup>†</sup> | No HI<br>N=211<br>n (%) | HI<br>N=21<br>n (%) | P-value <sup>†</sup> |
| <i>Demographic</i>                              |                         |                     |                      |                         |                     |                      |
| Gender                                          |                         |                     |                      |                         |                     |                      |
| Transgender                                     | 2 (1)                   | 0 (0)               | 1.000                | 0 (0)                   | 0 (0)               | -                    |
| Cisgender                                       | 180 (99)                | 17 (100)            |                      | 211 (100)               | 21 (100)            |                      |
| Age, median (IQR)                               | 30 (26-39)              | 34 (28-43)          | 0.182 <sup>‡</sup>   | 32 (27-37)              | 33 (26-40)          | 0.831 <sup>‡</sup>   |
| Race                                            |                         |                     |                      |                         |                     |                      |
| White                                           | 118 (65)                | 13 (76)             | 0.700                | 114 (54)                | 11 (52)             | 1.000                |
| Black                                           | 13 (7)                  | 0 (0)               |                      | 57 (27)                 | 6 (29)              |                      |
| Other/Multiple/Unknown                          | 51 (28)                 | 4 (24)              |                      | 40 (19)                 | 4 (19)              |                      |
| Hispanic or Latino ethnicity                    |                         |                     |                      |                         |                     |                      |
| Yes                                             | 36 (20)                 | 3 (18)              | 1.000                | 19 (9)                  | 1 (5)               | 0.754                |
| No                                              | 141 (77)                | 14 (82)             |                      | 184 (87)                | 19 (90)             |                      |
| Unknown                                         | 5 (3)                   | 0 (0)               |                      | 8 (4)                   | 1 (5)               |                      |
| Education completed                             |                         |                     |                      |                         |                     |                      |
| ≤High School or GED                             | 65 (36)                 | 4 (24)              | 0.484                | 88 (42)                 | 10 (48)             | 0.727                |
| Some college                                    | 36 (20)                 | 5 (29)              |                      | 42 (20)                 | 5 (24)              |                      |
| College graduate                                | 80 (44)                 | 8 (47)              |                      | 78 (38)                 | 6 (29)              |                      |
| <i>Behavioral</i>                               |                         |                     |                      |                         |                     |                      |
| Number sex partners past 2 months, median (IQR) | 3 (2-5)                 | 4 (2-6)             | 0.565 <sup>‡</sup>   | 2 (1-2)                 | 2 (1-2)             | 0.492 <sup>‡</sup>   |
| New sex partner past 2 months                   | 143 (80)                | 14 (82)             | 1.000                | 114 (69)                | 15 (75)             | 0.800                |
| Behaviors at last sexual episode <sup>§</sup>   |                         |                     |                      |                         |                     |                      |
| Vaginal sex                                     | -                       | -                   | -                    | 199 (95)                | 21 (100)            | 0.605                |
| Insertive oral sex                              | 130 (73)                | 14 (82)             | 0.567                | 110 (52)                | 13 (62)             | 0.494                |
| Insertive anal sex                              | 104 (58)                | 11 (65)             | 0.797                | 4 (2)                   | 1 (5)               | 0.382                |
| Always uses condoms with last sex partner       | 38 (22)                 | 3 (18)              | 1.000                | 44 (21)                 | 3 (15)              | 0.773                |
| <i>History</i>                                  |                         |                     |                      |                         |                     |                      |
| Reason for visit <sup>¶</sup>                   |                         |                     |                      |                         |                     |                      |
| Urethral symptoms                               | 84 (46)                 | 10 (59)             | 0.447                | 78 (37)                 | 19 (90)             | <0.001               |
| Other symptoms                                  | 5 (3)                   | 1 (6)               | 0.419                | 26 (12)                 | 0 (0)               | 0.141                |
| STD Testing                                     | 132 (73)                | 13 (76)             | 1.000                | 156 (74)                | 13 (65)             | 0.430                |
| History of previous STD                         |                         |                     |                      |                         |                     |                      |
| History of NGU                                  | 41 (23)                 | 3 (18)              | 0.768                | 24 (11)                 | 3 (14)              | 0.720                |
| History of chlamydial infection                 | 99 (55)                 | 10 (59)             | 1.000                | 58 (28)                 | 8 (38)              | 0.318                |
| History of gonococcal infection                 | 94 (52)                 | 11 (65)             | 0.447                | 30 (14)                 | 5 (24)              | 0.333                |
| Known HIV-positive                              | 15 (8)                  | 0 (0)               | 0.372                | 0 (0)                   | 0 (0)               | -                    |
| HIV pre-exposure prophylaxis use <sup>¶</sup>   | 28 (17)                 | 3 (18)              | 1.000                | 0 (0)                   | 0 (0)               | -                    |
| <i>Presentation</i>                             |                         |                     |                      |                         |                     |                      |
| Urethral symptoms                               | 102 (56)                | 13 (76)             | 0.127                | 89 (42)                 | 20 (95)             | <0.001               |
| Visible urethral discharge                      | 104 (57)                | 13 (76)             | 0.196                | 86 (41)                 | 20 (95)             | <0.001               |

| Characteristic*                      | MSM                     |                     |              | P-value† | MSW                     |                     |              |
|--------------------------------------|-------------------------|---------------------|--------------|----------|-------------------------|---------------------|--------------|
|                                      | No HI<br>N=182<br>n (%) | HI<br>N=17<br>n (%) |              |          | No HI<br>N=211<br>n (%) | HI<br>N=21<br>n (%) | P-value†     |
| PMNs/HPF on a urethral Gram stain    |                         |                     |              |          |                         |                     |              |
| 0-4                                  | 68 (37)                 | 2 (12)              |              | 111 (53) | 1 (5)                   |                     |              |
| 5-9                                  | 23 (13)                 | 2 (12)              | 0.062        | 25 (12)  | 5 (24)                  |                     | <0.001       |
| ≥10                                  | 91 (50)                 | 13 (76)             |              | 75 (36)  | 15 (71)                 |                     |              |
| NGU                                  | 114 (63)                | 15 (88)             | <b>0.036</b> | 100 (47) | 20 (95)                 |                     | <0.001       |
| <i>Urethral pathogen detection</i>   |                         |                     |              |          |                         |                     |              |
| <i>Chlamydia trachomatis</i> (NAAT)  | 39 (21)                 | 2 (12)              | 0.533        | 33 (16)  | 0 (0)                   |                     | 0.051        |
| <i>Mycoplasma genitalium</i> (NAAT)  | 31 (17)                 | 1 (6)               | 0.318        | 25 (12)  | 0 (0)                   |                     | 0.140        |
| Herpes simplex virus (qPCR)          | 1 (1)                   | 0 (0)               | 1.000        | 3 (1)    | 0 (0)                   |                     | 1.000        |
| Adenovirus (qPCR)                    | 5 (3)                   | 0 (0)               | 1.000        | 3 (1)    | 0 (0)                   |                     | 1.000        |
| <i>Trichomonas vaginalis</i> (qPCR)  | 0 (0)                   | 1 (6)               | 0.085        | 12 (6)   | 1 (5)                   |                     | 1.000        |
| <i>Mycoplasma penetrans</i> (qPCR)   | 18 (10)                 | 0 (0)               | 0.374        | 4 (2)    | 1 (5)                   |                     | 0.380        |
| <i>Ureaplasma urealyticum</i> (qPCR) | 36 (20)                 | 3 (18)              | 1.000        | 55 (26)  | 1 (5)                   |                     | <b>0.031</b> |

Abbreviation: GED, General Education Diploma; HI, *Haemophilus influenzae*; HIV, human immunodeficiency virus; HPF, high-power field; IQR, interquartile range; MSM, cisgender men who have sex with men only; MSW, cisgender men who have sex with women only; NAAT, nucleic acid amplification test; NGU, nongonococcal urethritis; PMN, polymorphonuclear leukocyte; STD, sexually transmitted disease; TGWSM, transgender women who have sex with men only.

\*n=4 missing education completed, n=18 missing ever had sex with a man, n=32 missing ever had sex with an HIV+ partner, n=14 missing number sex partners past 2 months, n=7 missing new sex partner past 2 months, n=1 missing vaginal sex at last sex, n=4 missing insertive oral sex at last sex, n=4 missing insertive anal at last sex, n=13 missing recent condom use with last sex partner, n=1 missing reason for visit is STD testing, n=4 missing history of NGU, n=4 missing history of chlamydial infection, and n=3 missing history of gonococcal infection. Participants with missing herpes simplex virus and adenovirus test results (n=16) were assumed to be negative for both pathogens.

†Fisher's exact test unless otherwise specified. Bold indicates significance at alpha=0.05 level.

‡Wilcoxon rank-sum test.

§Not mutually exclusive categories.

\*Multiple reasons for visit possible. Other symptoms include genital lesions/rash, non-genital rash, anorectal symptoms, testicular symptoms, oral/pharyngeal symptoms, and other symptoms.

‡Among participants who were not known to be HIV-positive.
