# Supplementary material
Source: PubMed Central journal article supplement (PMC8492123)
Supplement: ciaa1123_suppl_supplementary_table_06.pdf [file ciaa1123_suppl_supplementary_table_06.pdf]

Supplementary Table 6. Characteristics of 431 Participants with and without *Ureaplasma urealyticum* Separately by Sex of Sex Partners

| Characteristic*                                 | MSM                     |                     |              | MSW                     |                     |          |
|-------------------------------------------------|-------------------------|---------------------|--------------|-------------------------|---------------------|----------|
|                                                 | No UU<br>N=160<br>n (%) | UU<br>N=39<br>n (%) | P-value†     | No UU<br>N=176<br>n (%) | UU<br>N=56<br>n (%) | P-value† |
| <i>Demographic</i>                              |                         |                     |              |                         |                     |          |
| Gender                                          |                         |                     |              |                         |                     |          |
| Transgender                                     | 2 (1)                   | 0 (0)               | 1.000        | 0 (0)                   | 0 (0)               | -        |
| Cisgender                                       | 158 (99)                | 39 (100)            |              | 176 (100)               | 56 (100)            |          |
| Age, median (IQR)                               | 31 (27-40)              | 29 (25-37)          | 0.255‡       | 32 (26-36)              | 33.5 (27-41)        | 0.278‡   |
| Race                                            |                         |                     |              |                         |                     |          |
| White                                           | 104 (65)                | 27 (69)             | 0.181        | 94 (53)                 | 31 (55)             | 0.857    |
| Black                                           | 13 (8)                  | 0 (0)               |              | 47 (27)                 | 16 (29)             |          |
| Other/Multiple/Unknown                          | 43 (27)                 | 12 (31)             |              | 35 (20)                 | 9 (16)              |          |
| Hispanic or Latino ethnicity                    |                         |                     |              |                         |                     |          |
| Yes                                             | 33 (21)                 | 6 (15)              | 0.573        | 16 (9)                  | 4 (7)               | 0.380    |
| No                                              | 122 (76)                | 33 (85)             |              | 155 (88)                | 48 (86)             |          |
| Unknown                                         | 5 (3)                   | 0 (0)               |              | 5 (3)                   | 4 (7)               |          |
| Education completed                             |                         |                     |              |                         |                     |          |
| ≤High School or GED                             | 59 (37)                 | 10 (26)             | 0.064        | 77 (44)                 | 21 (39)             | 0.383    |
| Some college                                    | 36 (23)                 | 5 (13)              |              | 38 (22)                 | 9 (17)              |          |
| College graduate                                | 64 (40)                 | 24 (62)             |              | 60 (34)                 | 24 (44)             |          |
| <i>Behavioral</i>                               |                         |                     |              |                         |                     |          |
| Number sex partners past 2 months, median (IQR) | 3 (2-5)                 | 4 (2-6)             | 0.230‡       | 2 (1-2)                 | 2 (1-3)             | 0.672‡   |
| New sex partner past 2 months                   | 124 (79)                | 33 (87)             | 0.363        | 120 (69)                | 39 (71)             | 0.867    |
| Behaviors at last sexual episode§               |                         |                     |              |                         |                     |          |
| Vaginal sex                                     | -                       | -                   | -            | 165 (94)                | 55 (98)             | 0.304    |
| Insertive oral sex                              | 112 (71)                | 32 (82)             | 0.225        | 94 (54)                 | 29 (52)             | 0.878    |
| Insertive anal sex                              | 85 (54)                 | 30 (77)             | <b>0.011</b> | 5 (3)                   | 0 (0)               | 0.339    |
| Always uses condoms with last sex partner       | 38 (25)                 | 3 (8)               | <b>0.026</b> | 38 (22)                 | 9 (17)              | 0.447    |
| <i>History</i>                                  |                         |                     |              |                         |                     |          |
| Reason for visit¶                               |                         |                     |              |                         |                     |          |
| Urethral symptoms                               | 72 (45)                 | 22 (56)             | 0.215        | 75 (43)                 | 22 (39)             | 0.756    |
| Other symptoms                                  | 5 (3)                   | 1 (3)               | 1.000        | 19 (11)                 | 7 (13)              | 0.808    |
| STD Testing                                     | 116 (73)                | 29 (74)             | 1.000        | 129 (74)                | 40 (71)             | 0.732    |
| History of previous STD                         |                         |                     |              |                         |                     |          |
| History of NGU                                  | 34 (21)                 | 10 (27)             | 0.512        | 21 (12)                 | 6 (11)              | 1.000    |
| History of chlamydial infection                 | 89 (56)                 | 20 (54)             | 0.856        | 52 (30)                 | 14 (25)             | 0.611    |
| History of gonococcal infection                 | 86 (54)                 | 19 (51)             | 0.856        | 25 (14)                 | 10 (18)             | 0.519    |
| Known HIV-positive                              | 10 (6)                  | 5 (13)              | 0.179        | 0 (0)                   | 0 (0)               | -        |
| HIV pre-exposure prophylaxis use¶               | 24 (16)                 | 7 (21)              | 0.611        | 0 (0)                   | 0 (0)               | -        |
| <i>Presentation</i>                             |                         |                     |              |                         |                     |          |
| Urethral symptoms                               | 89 (56)                 | 26 (67)             | 0.278        | 84 (48)                 | 25 (45)             | 0.759    |
| Visible urethral discharge                      | 90 (56)                 | 27 (69)             | 0.151        | 80 (45)                 | 26 (46)             | 1.000    |

| Characteristic*                      | MSM                     |                     |          | MSW                     |                     |              |
|--------------------------------------|-------------------------|---------------------|----------|-------------------------|---------------------|--------------|
|                                      | No UU<br>N=160<br>n (%) | UU<br>N=39<br>n (%) | P-value† | No UU<br>N=176<br>n (%) | UU<br>N=56<br>n (%) | P-value†     |
| PMNs/HPF on a urethral Gram stain    |                         |                     |          |                         |                     |              |
| 0-4                                  | 59 (37)                 | 11 (28)             | 0.469    | 84 (48)                 | 28 (50)             | 0.623        |
| 5-9                                  | 21 (13)                 | 4 (10)              |          | 25 (14)                 | 5 (9)               |              |
| ≥10                                  | 80 (50)                 | 24 (62)             |          | 67 (38)                 | 23 (41)             |              |
| NGU                                  | 101 (63)                | 28 (72)             | 0.354    | 92 (52)                 | 28 (50)             | 0.878        |
| <i>Urethral pathogen detection</i>   |                         |                     |          |                         |                     |              |
| <i>Chlamydia trachomatis</i> (NAAT)  | 32 (20)                 | 9 (23)              | 0.663    | 26 (15)                 | 7 (13)              | 0.827        |
| <i>Mycoplasma genitalium</i> (NAAT)  | 24 (15)                 | 8 (21)              | 0.465    | 21 (12)                 | 4 (7)               | 0.458        |
| Herpes simplex virus (qPCR)          | 1 (1)                   | 0 (0)               | 1.000    | 2 (1)                   | 1 (2)               | 0.565        |
| Adenovirus (qPCR)                    | 5 (3)                   | 0 (0)               | 0.585    | 2 (1)                   | 1 (2)               | 0.565        |
| <i>Trichomonas vaginalis</i> (qPCR)  | 1 (1)                   | 0 (0)               | 1.000    | 11 (6)                  | 2 (4)               | 0.739        |
| <i>Mycoplasma penetrans</i> (qPCR)   | 12 (8)                  | 6 (15)              | 0.129    | 2 (1)                   | 3 (5)               | 0.092        |
| <i>Haemophilus influenzae</i> (qPCR) | 14 (9)                  | 3 (8)               | 1.000    | 20 (11)                 | 1 (2)               | <b>0.031</b> |

Abbreviation: GED, General Education Diploma; HIV, human immunodeficiency virus; HPF, high-power field; IQR, interquartile range; MSM, cisgender men who have sex with men only; MSW, cisgender men who have sex with women only; NAAT, nucleic acid amplification test; NGU, nongonococcal urethritis; PMN, polymorphonuclear leukocyte; STD, sexually transmitted disease; TGWSM, transgender women who have sex with men only; UU, *Ureaplasma urealyticum*.

\*n=4 missing education completed, n=18 missing ever had sex with a man, n=32 missing ever had sex with an HIV+ partner, n=14 missing number sex partners past 2 months, n=7 missing new sex partner past 2 months, n=1 missing vaginal sex at last sex, n=4 missing insertive oral sex at last sex, n=4 missing insertive anal at last sex, n=13 missing recent condom use with last sex partner, n=1 missing reason for visit is STD testing, n=4 missing history of NGU, n=4 missing history of chlamydial infection, and n=3 missing history of gonococcal infection. Participants with missing herpes simplex virus and adenovirus test results (n=16) were assumed to be negative for both pathogens.

†Fisher's exact test unless otherwise specified. Bold indicates significance at alpha=0.05 level.

‡Wilcoxon rank-sum test.

§Not mutually exclusive categories.

\*Multiple reasons for visit possible. Other symptoms include genital lesions/rash, non-genital rash, anorectal symptoms, testicular symptoms, oral/pharyngeal symptoms, and other symptoms.

‡Among participants who were not known to be HIV-positive.
