# Supplementary material
Source: PubMed Central journal article supplement (PMC8492123)

A

NGU NEGATIVE

NGU POSITIVE

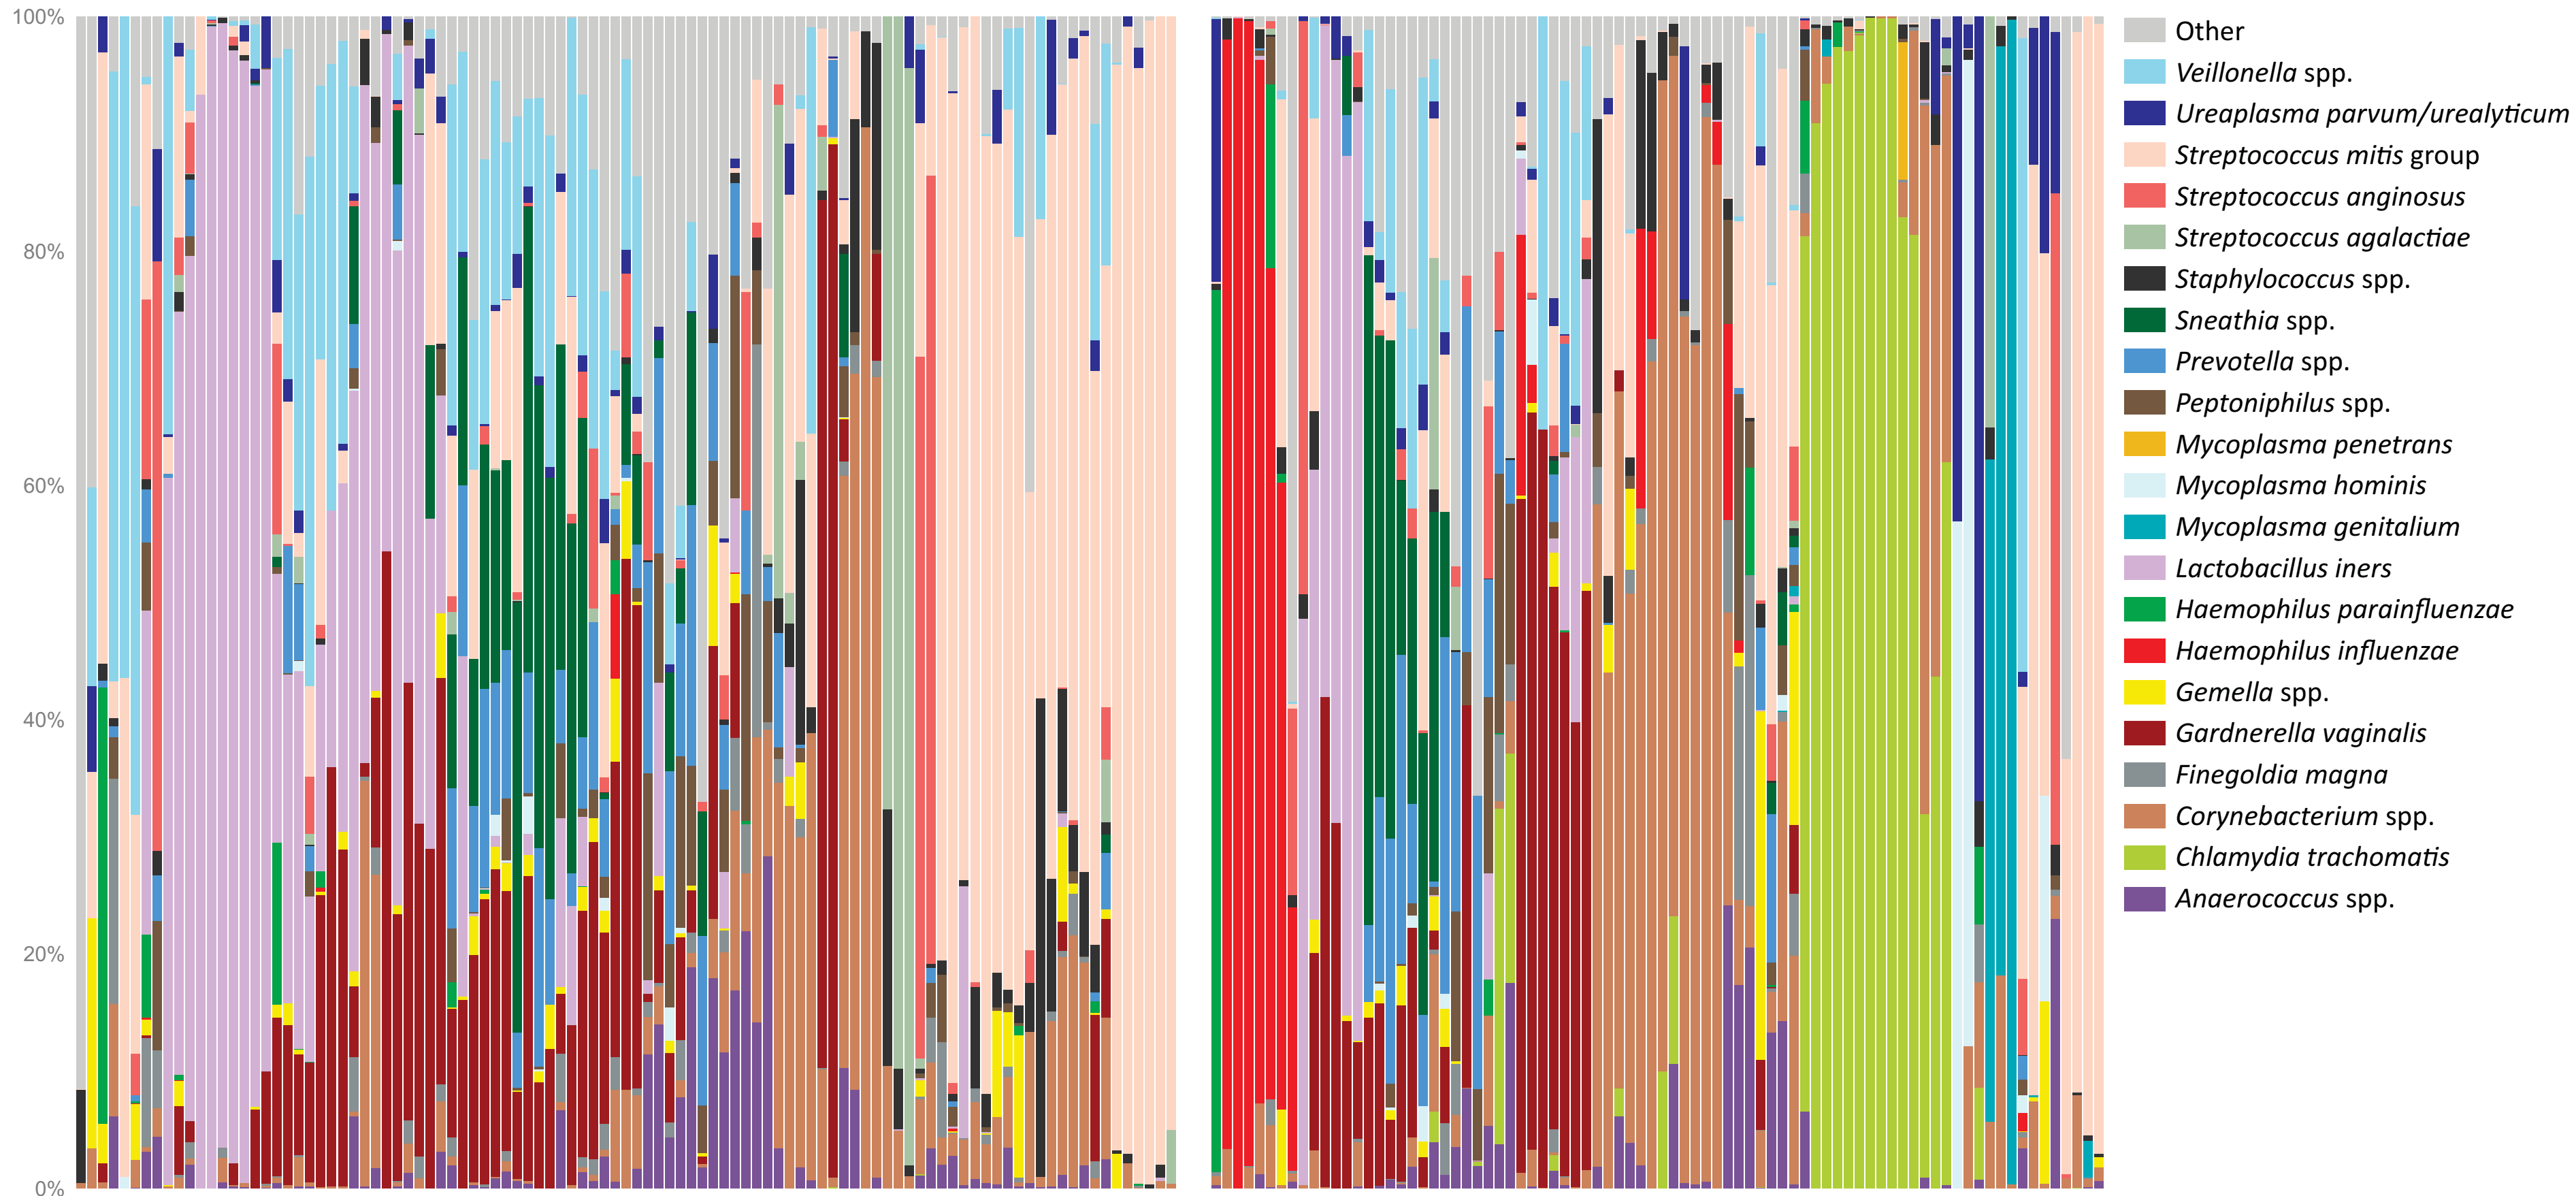

B

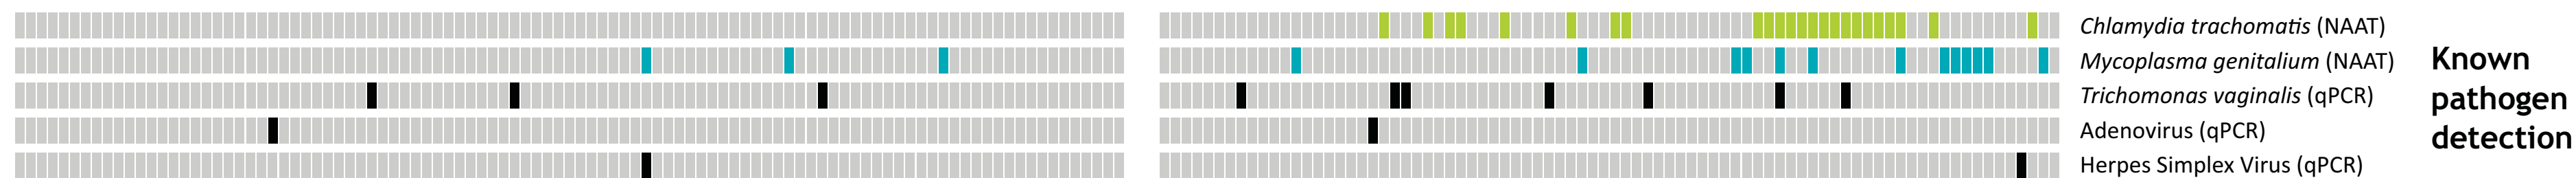

C

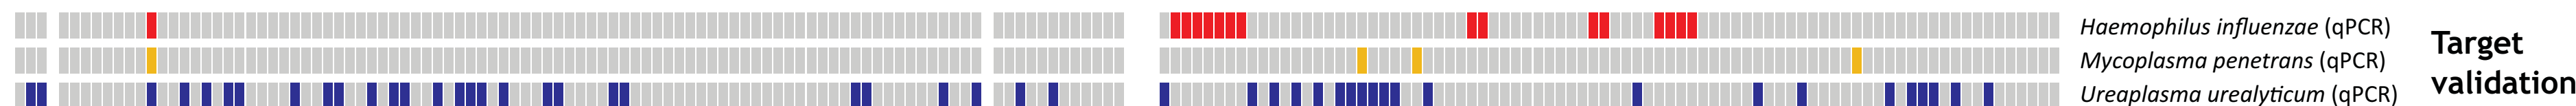

D

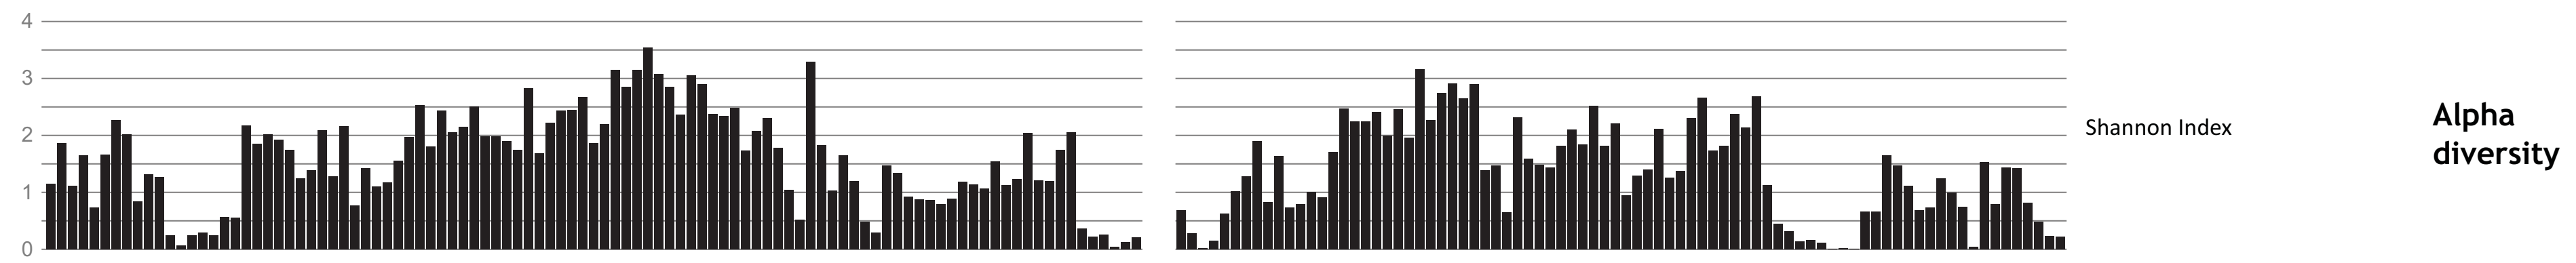

Supplement: ciaa1123_suppl_supplementary_figure_02.pdf [file ciaa1123_suppl_supplementary_figure_02.pdf]
